# Supplementary material for: Signature-driven repurposing of Midostaurin for combination with MEK1/2 and KRASG12C inhibitors in lung cancer
Source: PubMed Central journal article supplement (PMC10564741; doi:10.1038/s41467-023-41828-z), 2023-10-10
Supplement: 41467_2023_41828_MOESM5_ESM.pdf [file 41467_2023_41828_MOESM5_ESM.pdf]

**Title:** Supplementary Data 1:

**Description:** Normalized RNAseq data\_GSE161218

H1792 cell line treated with Trametinib and Lestaurtinib

**Title:** Supplementary data 2:

**Description:** Proteomics data\_H1792 cell line\_All comparisons

H1792 treated with Trametinib, Lestaurtinib or both

H1792-TR cell lines undergoing Trametinib treatment treated with Lestaurtinib
