# Supplementary material for: Signature-driven repurposing of Midostaurin for combination with MEK1/2 and KRASG12C inhibitors in lung cancer
Source: Nat Commun. 2023 Oct 10;14:6332. doi: 10.1038/s41467-023-41828-z (PMC10564741; doi:10.1038/s41467-023-41828-z)
Supplement: Supplementary file 3 — Supplementary Data 1 [file 41467_2023_41828_MOESM3_ESM.xlsx]

## Sheet: Tram vs Ctrl
gene_id	gene_type	gene_name	level	havana_gene	chr	DB	Type	start	end	strand	logFC	FC	AveExpr	t	P.Value	adj.P.Val	B
ENSG00000026508.18	protein_coding	CD44	1	OTTHUMG00000044388.9	chr11	HAVANA	gene	35138870	35232402	+	-2.91561	0.13253	7.1638	-26.3603	2.90925e-15	4.33624e-11	25.0017
ENSG00000139289.13	protein_coding	PHLDA1	2	OTTHUMG00000169783.2	chr12	HAVANA	gene	76025447	76033932	-	-4.40838	0.0470917	5.51764	-23.5647	1.87575e-14	1.3979e-10	23.0078
ENSG00000164400.5	protein_coding	CSF2	2	OTTHUMG00000059637.3	chr5	HAVANA	gene	132073790	132076170	+	-5.49188	0.0222218	4.73225	-22.8615	3.09792e-14	1.53915e-10	22.5474
ENSG00000172927.7	protein_coding	MYEOV	2	OTTHUMG00000167836.4	chr11	HAVANA	gene	69294138	69367726	+	-4.40344	0.0472533	3.51657	-22.1576	5.19493e-14	1.93576e-10	21.342
ENSG00000104368.17	protein_coding	PLAT	1	OTTHUMG00000164072.2	chr8	HAVANA	gene	42175233	42207724	-	-3.73734	0.0749804	4.06588	-20.645	1.66535e-13	4.96441e-10	20.8363
ENSG00000163661.3	protein_coding	PTX3	2	OTTHUMG00000158750.1	chr3	HAVANA	gene	157436789	157443628	+	-3.24966	0.105137	4.72614	-18.7472	8.07617e-13	2.00626e-09	19.5176
ENSG00000165092.12	protein_coding	ALDH1A1	2	OTTHUMG00000020019.2	chr9	HAVANA	gene	72900662	73080442	-	2.38662	5.22929	7.38601	18.5536	9.56532e-13	2.03673e-09	19.5047
ENSG00000105825.11	protein_coding	TFPI2	1	OTTHUMG00000022963.3	chr7	HAVANA	gene	93885397	93890991	-	-2.0152	0.24738	7.20555	-17.6697	2.115e-12	3.53094e-09	18.7379
ENSG00000085117.11	protein_coding	CD82	1	OTTHUMG00000166472.2	chr11	HAVANA	gene	44564427	44620363	+	-2.42593	0.18609	5.66737	-17.661	2.13206e-12	3.53094e-09	18.6992
ENSG00000128567.16	protein_coding	PODXL	2	OTTHUMG00000154918.4	chr7	HAVANA	gene	131500262	131558217	-	-2.89032	0.134873	5.06426	-16.9424	4.17609e-12	5.6586e-09	18.0333
ENSG00000169271.2	protein_coding	HSPB3	2	OTTHUMG00000096995.2	chr5	HAVANA	gene	54455601	54456384	+	2.07413	4.21092	5.92085	16.5213	6.26693e-12	7.78404e-09	17.6328
ENSG00000142627.12	protein_coding	EPHA2	2	OTTHUMG00000009527.2	chr1	HAVANA	gene	16124337	16156087	-	-4.56265	0.042316	3.5207	-17.4279	2.64435e-12	3.94141e-09	17.4009
ENSG00000163814.7	protein_coding	CDCP1	2	OTTHUMG00000133090.3	chr3	HAVANA	gene	45082278	45146422	-	-2.80646	0.142945	4.54642	-16.0316	1.01658e-11	1.0823e-08	17.1507
ENSG00000011422.11	protein_coding	PLAUR	1	OTTHUMG00000182778.2	chr19	HAVANA	gene	43646095	43670547	-	-2.21381	0.215564	5.29959	-15.8604	1.20762e-11	1.19997e-08	16.9991
ENSG00000104081.13	protein_coding	BMF	2	OTTHUMG00000129875.3	chr15	HAVANA	gene	40087890	40108892	-	3.23545	9.41817	4.5176	16.1087	9.41221e-12	1.07915e-08	16.9384
ENSG00000106366.8	protein_coding	SERPINE1	1	OTTHUMG00000157107.2	chr7	HAVANA	gene	101127089	101139266	+	-2.15484	0.224558	8.83338	-15.5405	1.67359e-11	1.46735e-08	16.6798
ENSG00000120875.8	protein_coding	DUSP4	1	OTTHUMG00000133395.2	chr8	HAVANA	gene	29333064	29350668	-	-2.59424	0.165599	3.64521	-15.5649	1.63197e-11	1.46735e-08	16.6032
ENSG00000134531.9	protein_coding	EMP1	1	OTTHUMG00000168775.5	chr12	HAVANA	gene	13196716	13219939	+	-3.9215	0.0659951	4.27777	-15.0795	2.70617e-11	2.24086e-08	16.073
ENSG00000095739.10	protein_coding	BAMBI	2	OTTHUMG00000017874.2	chr10	HAVANA	gene	28677342	28682939	+	1.83783	3.57472	7.83156	14.7897	3.68484e-11	2.89066e-08	15.8993
ENSG00000133816.14	protein_coding	MICAL2	1	OTTHUMG00000165744.8	chr11	HAVANA	gene	12094008	12359144	+	-2.79499	0.144087	5.36995	-14.6618	4.2299e-11	3.00222e-08	15.7596
ENSG00000249992.1	protein_coding	TMEM158	2	OTTHUMG00000160317.2	chr3	HAVANA	gene	45224466	45226278	-	-1.76522	0.294181	7.15437	-14.4526	5.31164e-11	3.44218e-08	15.5289
ENSG00000175832.12	protein_coding	ETV4	1	OTTHUMG00000180884.1	chr17	HAVANA	gene	43527844	43579620	-	-3.37987	0.0960637	2.76842	-14.6733	4.1772e-11	3.00222e-08	15.3829
ENSG00000198959.11	protein_coding	TGM2	2	OTTHUMG00000032437.4	chr20	HAVANA	gene	38127387	38166578	-	-1.99643	0.250619	7.92548	-14.3104	6.21169e-11	3.85772e-08	15.3577
ENSG00000128342.4	protein_coding	LIF	2	OTTHUMG00000150910.2	chr22	HAVANA	gene	30240447	30246851	-	-3.42001	0.0934276	3.3317	-14.4637	5.24796e-11	3.44218e-08	15.2698
ENSG00000135318.11	protein_coding	NT5E	2	OTTHUMG00000015139.2	chr6	HAVANA	gene	85449584	85495791	+	-2.80859	0.142735	4.70695	-14.1543	7.38708e-11	4.40418e-08	15.2058
ENSG00000122861.15	protein_coding	PLAU	2	OTTHUMG00000018494.5	chr10	HAVANA	gene	73909177	73917497	+	-3.19807	0.108965	5.23848	-14.0215	8.57194e-11	4.88864e-08	15.0691
ENSG00000099250.17	protein_coding	NRP1	2	OTTHUMG00000019343.5	chr10	HAVANA	gene	33177492	33336262	-	-1.95255	0.258359	4.8429	-13.9892	8.88941e-11	4.88864e-08	15.035
ENSG00000211772.11	TR_C_gene	TRBC2	2	OTTHUMG00000158912.3	chr7	HAVANA	gene	142801041	142802748	+	-2.2717	0.207085	3.75789	-13.9603	9.18363e-11	4.88864e-08	14.9936
ENSG00000108691.9	protein_coding	CCL2	2	OTTHUMG00000132887.3	chr17	HAVANA	gene	34255218	34257203	+	-2.31889	0.200421	5.73127	-13.8851	9.99856e-11	5.13891e-08	14.9153
ENSG00000164171.10	protein_coding	ITGA2	2	OTTHUMG00000131165.4	chr5	HAVANA	gene	52989326	53094779	+	-2.85533	0.138185	5.0677	-13.6959	1.24069e-10	6.16416e-08	14.7059
ENSG00000117318.8	protein_coding	ID3	2	OTTHUMG00000003229.2	chr1	HAVANA	gene	23557918	23559794	-	2.42369	5.36541	7.68065	13.6664	1.28332e-10	6.17026e-08	14.6572
ENSG00000140859.15	protein_coding	KIFC3	1	OTTHUMG00000133455.19	chr16	HAVANA	gene	57758217	57863053	-	-1.89423	0.269016	5.72178	-13.5909	1.39994e-10	6.52065e-08	14.5847
ENSG00000109511.11	protein_coding	ANXA10	2	OTTHUMG00000161275.2	chr4	HAVANA	gene	168092515	168187690	+	-1.72785	0.301901	6.29778	-13.4547	1.63951e-10	7.40513e-08	14.4115
ENSG00000175592.8	protein_coding	FOSL1	1	OTTHUMG00000166715.4	chr11	HAVANA	gene	65892049	65900573	-	-2.54648	0.171173	5.76915	-13.2578	2.06467e-10	9.05116e-08	14.2011
ENSG00000124191.17	protein_coding	C20orf100	2	OTTHUMG00000032517.5	chr20	HAVANA	gene	43914864	44069616	+	-2.36421	0.194224	3.83061	-13.18	2.26348e-10	9.63921e-08	14.1073
ENSG00000138623.10	protein_coding	SEMA7A	2	OTTHUMG00000139000.5	chr15	HAVANA	gene	74409289	74433958	-	-3.22036	0.107294	2.61015	-13.113	2.45087e-10	1.01473e-07	13.795
ENSG00000129474.15	protein_coding	AJUBA	1	OTTHUMG00000028711.5	chr14	HAVANA	gene	22971174	22982642	-	1.49854	2.82557	6.70852	12.6238	4.42613e-10	1.78301e-07	13.4309
ENSG00000198369.9	protein_coding	SPRED2	1	OTTHUMG00000152737.5	chr2	HAVANA	gene	65310851	65432637	-	-2.07112	0.237974	5.51086	-12.4737	5.32591e-10	2.08902e-07	13.2541
ENSG00000133131.14	protein_coding	MORC4	2	OTTHUMG00000022155.4	chrX	HAVANA	gene	106813871	107000244	-	-1.909	0.266277	4.21417	-12.3583	6.14841e-10	2.29105e-07	13.1206
ENSG00000145623.12	protein_coding	OSMR	1	OTTHUMG00000090811.2	chr5	HAVANA	gene	38845858	38945596	+	-2.03854	0.24341	5.99343	-12.3602	6.13367e-10	2.29105e-07	13.0887
ENSG00000149798.4	protein_coding	CDC42EP2	2	OTTHUMG00000165958.1	chr11	HAVANA	gene	65314818	65322429	+	-2.28075	0.205791	4.00525	-12.2538	7.00848e-10	2.52724e-07	12.9766
ENSG00000125148.6	protein_coding	MT2A	2	OTTHUMG00000133281.2	chr16	HAVANA	gene	56608199	56609497	+	-1.77076	0.293054	10.0162	-12.1798	7.69427e-10	2.66705e-07	12.7748
ENSG00000106089.11	protein_coding	STX1A	1	OTTHUMG00000137422.3	chr7	HAVANA	gene	73699206	73719672	-	-3.62729	0.080924	2.51679	-12.2411	7.12138e-10	2.52724e-07	12.7007
ENSG00000128340.14	protein_coding	RAC2	1	OTTHUMG00000150540.2	chr22	HAVANA	gene	37225261	37244448	-	-2.37421	0.192882	4.67651	-12.0172	9.45941e-10	3.1016e-07	12.6973
ENSG00000125538.11	protein_coding	IL1B	2	OTTHUMG00000131344.3	chr2	HAVANA	gene	112829751	112836903	-	-3.7023	0.076824	3.9696	-12.0079	9.57219e-10	3.1016e-07	12.6839
ENSG00000110031.12	protein_coding	LPXN	1	OTTHUMG00000167466.3	chr11	HAVANA	gene	58526871	58578220	-	-1.63726	0.321466	6.66707	-11.9196	1.07188e-09	3.33882e-07	12.5141
ENSG00000164251.4	protein_coding	F2RL1	2	OTTHUMG00000102118.4	chr5	HAVANA	gene	76818933	76835315	+	-2.86292	0.13746	2.52647	-11.9172	1.07523e-09	3.33882e-07	12.4795
ENSG00000028277.21	protein_coding	POU2F2	2	OTTHUMG00000165991.12	chr19	HAVANA	gene	42086110	42196585	-	-2.46289	0.181383	3.24588	-11.7585	1.32002e-09	3.85783e-07	12.3499
ENSG00000146278.10	protein_coding	PNRC1	1	OTTHUMG00000015191.2	chr6	HAVANA	gene	89080751	89085160	+	1.8693	3.65357	6.98161	11.7319	1.36654e-09	3.91699e-07	12.2751
ENSG00000164056.10	protein_coding	SPRY1	2	OTTHUMG00000133071.3	chr4	HAVANA	gene	123396795	123403760	+	-2.70871	0.152966	2.7084	-11.7894	1.26822e-09	3.78056e-07	12.2461
ENSG00000197301.7	antisense	RP11-366L20.2	1	OTTHUMG00000168956.1	chr12	HAVANA	gene	65851340	65882167	-	-3.19444	0.109239	2.36878	-11.8256	1.21006e-09	3.6808e-07	12.2011
ENSG00000132334.16	protein_coding	PTPRE	2	OTTHUMG00000019254.3	chr10	HAVANA	gene	127907061	128085855	+	-2.15	0.225313	3.41927	-11.5915	1.64209e-09	4.61799e-07	12.1392
ENSG00000136859.9	protein_coding	ANGPTL2	2	OTTHUMG00000020695.1	chr9	HAVANA	gene	127087332	127122883	-	-1.78353	0.290473	4.06062	-11.5414	1.7539e-09	4.80871e-07	12.0879
ENSG00000100292.16	protein_coding	HMOX1	2	OTTHUMG00000150960.3	chr22	HAVANA	gene	35380361	35394214	+	1.60035	3.03216	6.7821	11.5326	1.77443e-09	4.80871e-07	12.0208
ENSG00000077238.13	protein_coding	IL4R	1	OTTHUMG00000097015.11	chr16	HAVANA	gene	27313668	27364778	+	-1.90958	0.26617	3.76494	-11.4271	2.04044e-09	5.43085e-07	11.9395
ENSG00000146674.14	protein_coding	IGFBP3	1	OTTHUMG00000023769.9	chr7	HAVANA	gene	45912245	45921874	-	5.14502	35.3838	3.57787	12.1206	8.29263e-10	2.80913e-07	11.8707
ENSG00000139211.6	protein_coding	AMIGO2	2	OTTHUMG00000169616.1	chr12	HAVANA	gene	47075707	47079951	-	-1.68399	0.311221	5.71002	-11.3955	2.12821e-09	5.55017e-07	11.8553
ENSG00000123689.5	protein_coding	G0S2	2	OTTHUMG00000036479.1	chr1	HAVANA	gene	209675420	209676388	+	-1.86787	0.273978	6.05677	-11.3778	2.17903e-09	5.55017e-07	11.8219
ENSG00000142871.16	protein_coding	CYR61	2	OTTHUMG00000010577.1	chr1	HAVANA	gene	85580761	85583962	+	-1.47428	0.359912	7.5825	-11.3699	2.2022e-09	5.55017e-07	11.7841
ENSG00000153094.22	protein_coding	BCL2L11	2	OTTHUMG00000131256.9	chr2	HAVANA	gene	111119378	111168447	+	1.77521	3.42287	4.99152	11.3108	2.38312e-09	5.7291e-07	11.777
ENSG00000082781.11	protein_coding	ITGB5	1	OTTHUMG00000159432.9	chr3	HAVANA	gene	124761948	124901418	-	-1.56187	0.338712	6.33552	-11.359	2.23422e-09	5.55017e-07	11.7738
ENSG00000135480.15	protein_coding	KRT7	1	OTTHUMG00000169580.1	chr12	HAVANA	gene	52232520	52252186	+	-1.20432	0.433973	8.634	-11.3228	2.34508e-09	5.7291e-07	11.6735
ENSG00000112715.21	protein_coding	VEGFA	2	OTTHUMG00000014745.13	chr6	HAVANA	gene	43770184	43786487	+	-1.31427	0.402128	5.99875	-11.2574	2.5603e-09	6.05735e-07	11.6558
ENSG00000114315.3	protein_coding	HES1	2	OTTHUMG00000155984.1	chr3	HAVANA	gene	194136145	194138732	+	-2.09565	0.233962	3.93314	-11.1981	2.77309e-09	6.45826e-07	11.6281
ENSG00000115641.18	protein_coding	FHL2	2	OTTHUMG00000153120.5	chr2	HAVANA	gene	105357712	105438513	-	-1.11731	0.460952	6.91292	-11.1763	2.85628e-09	6.54967e-07	11.5038
ENSG00000146950.12	protein_coding	SHROOM2	2	OTTHUMG00000021121.2	chrX	HAVANA	gene	9786456	9949443	+	-2.08634	0.235477	2.77251	-10.8845	4.25509e-09	9.466e-07	11.2156
ENSG00000168389.17	protein_coding	MFSD2A	2	OTTHUMG00000009293.2	chr1	HAVANA	gene	39955112	39969968	+	-2.15335	0.22479	3.07303	-10.8262	4.61241e-09	1.011e-06	11.1289
ENSG00000196139.13	protein_coding	AKR1C3	2	OTTHUMG00000017585.6	chr10	HAVANA	gene	5035354	5107686	+	1.35151	2.55178	10.4375	10.8099	4.71752e-09	1.01905e-06	10.9214
ENSG00000244405.7	protein_coding	ETV5	2	OTTHUMG00000156639.4	chr3	HAVANA	gene	186046308	186110318	-	-2.19207	0.218837	3.05886	-10.6702	5.73218e-09	1.20335e-06	10.9132
ENSG00000187720.14	protein_coding	THSD4	2	OTTHUMG00000133389.7	chr15	HAVANA	gene	71096952	71783383	+	-2.23663	0.212181	2.66166	-10.6562	5.84591e-09	1.21019e-06	10.8555
ENSG00000197632.8	protein_coding	SERPINB2	2	OTTHUMG00000060592.4	chr18	HAVANA	gene	63871692	63903890	+	-1.57803	0.334938	5.24187	-10.6216	6.13674e-09	1.25299e-06	10.8322
ENSG00000169429.10	protein_coding	CXCL8	2	OTTHUMG00000151316.1	chr4	HAVANA	gene	73740506	73743716	+	-6.05321	0.0150592	2.59504	-10.6703	5.73145e-09	1.20335e-06	10.7706
ENSG00000138772.12	protein_coding	ANXA3	1	OTTHUMG00000130198.9	chr4	HAVANA	gene	78551519	78610451	+	2.71655	6.57298	4.87909	10.56	6.69364e-09	1.33976e-06	10.7455
ENSG00000197321.14	protein_coding	SVIL	2	OTTHUMG00000017882.4	chr10	HAVANA	gene	29457338	29736781	-	-1.58719	0.33282	4.40266	-10.554	6.75009e-09	1.33976e-06	10.7414
ENSG00000134070.4	protein_coding	IRAK2	2	OTTHUMG00000155358.1	chr3	HAVANA	gene	10164865	10243743	+	-1.67416	0.313348	4.69375	-10.5443	6.84291e-09	1.33976e-06	10.7154
ENSG00000188042.7	protein_coding	ARL4C	2	OTTHUMG00000133291.2	chr2	HAVANA	gene	234493041	234497053	-	-1.52982	0.346321	4.09006	-10.5363	6.92125e-09	1.33976e-06	10.7103
ENSG00000121895.7	protein_coding	TMEM156	1	OTTHUMG00000128582.4	chr4	HAVANA	gene	38966744	39032922	-	-2.17453	0.221514	2.86622	-10.5144	7.13946e-09	1.36428e-06	10.6768
ENSG00000171345.13	protein_coding	KRT19	1	OTTHUMG00000133422.5	chr17	HAVANA	gene	41523617	41528308	-	1.42586	2.68675	5.6966	10.4724	7.57777e-09	1.4297e-06	10.5684
ENSG00000163683.11	protein_coding	SMIM14	1	OTTHUMG00000128581.7	chr4	HAVANA	gene	39546330	39639090	-	1.43136	2.69701	5.19425	10.429	8.05978e-09	1.4831e-06	10.5595
ENSG00000148082.9	protein_coding	SHC3	2	OTTHUMG00000020179.2	chr9	HAVANA	gene	89005771	89178767	-	-1.61471	0.326531	3.78895	-10.4008	8.39077e-09	1.5068e-06	10.5472
ENSG00000177606.6	protein_coding	JUN	2	OTTHUMG00000008376.1	chr1	HAVANA	gene	58780788	58784327	-	-1.20991	0.432296	6.38885	-10.404	8.35223e-09	1.5068e-06	10.4445
ENSG00000143320.8	protein_coding	CRABP2	2	OTTHUMG00000041300.3	chr1	HAVANA	gene	156699606	156705816	-	2.29879	4.92046	5.39837	10.3195	9.4277e-09	1.67286e-06	10.399
ENSG00000167772.11	protein_coding	ANGPTL4	2	OTTHUMG00000182273.5	chr19	HAVANA	gene	8363289	8374373	+	-4.71461	0.0380855	2.56385	-10.4518	7.80248e-09	1.4537e-06	10.3221
ENSG00000057019.15	protein_coding	DCBLD2	1	OTTHUMG00000151985.3	chr3	HAVANA	gene	98795941	98901689	-	-2.02265	0.246106	3.37998	-10.2352	1.06453e-08	1.84499e-06	10.3115
ENSG00000149948.13	protein_coding	HMGA2	2	OTTHUMG00000168936.2	chr12	HAVANA	gene	65824131	65966295	+	-2.17679	0.221167	3.6013	-10.1647	1.17893e-08	1.99682e-06	10.2104
ENSG00000067064.11	protein_coding	IDI1	2	OTTHUMG00000017536.4	chr10	HAVANA	gene	1039152	1049170	-	1.02467	2.03449	7.65911	10.2757	1.00409e-08	1.7607e-06	10.2073
ENSG00000110092.3	protein_coding	CCND1	1	OTTHUMG00000167877.3	chr11	HAVANA	gene	69641087	69654474	+	-1.40397	0.377887	5.32697	-10.206	1.11036e-08	1.90229e-06	10.2002
ENSG00000107551.20	protein_coding	RASSF4	2	OTTHUMG00000018060.6	chr10	HAVANA	gene	44959407	44995891	+	2.42601	5.37405	3.83533	10.1219	1.25475e-08	2.10135e-06	10.1364
ENSG00000231298.6	lincRNA	RP11-117P22.1	2	OTTHUMG00000017576.2	chr10	HAVANA	gene	4650185	4678154	-	-3.44005	0.0921389	2.15066	-10.0442	1.40554e-08	2.32773e-06	9.95216
ENSG00000186960.10	lincRNA	C14orf23	2	OTTHUMG00000029410.6	chr14	HAVANA	gene	28772704	28813453	+	-1.85679	0.27609	3.53824	-9.9936	1.51393e-08	2.47968e-06	9.94869
ENSG00000160326.13	protein_coding	SLC2A6	2	OTTHUMG00000020874.3	chr9	HAVANA	gene	133471095	133479137	-	1.61907	3.07178	5.52895	9.95964	1.59157e-08	2.55079e-06	9.8376
ENSG00000187678.9	protein_coding	SPRY4	2	OTTHUMG00000129663.5	chr5	HAVANA	gene	142310427	142326455	-	-4.84699	0.0347465	0.339972	-10.9002	4.16387e-09	9.4034e-07	9.81773
ENSG00000184557.4	protein_coding	SOCS3	2	OTTHUMG00000177513.5	chr17	HAVANA	gene	78356778	78360077	-	-1.97829	0.25379	3.12142	-9.8638	1.83401e-08	2.85876e-06	9.77464
ENSG00000100558.8	protein_coding	PLEK2	1	OTTHUMG00000171247.3	chr14	HAVANA	gene	67386983	67412200	-	-1.10368	0.465328	6.38092	-9.93098	1.66032e-08	2.63267e-06	9.72539
ENSG00000163735.6	protein_coding	CXCL5	2	OTTHUMG00000160871.1	chr4	HAVANA	gene	73995642	73998779	-	-0.976906	0.508068	10.0818	-9.97014	1.56714e-08	2.53893e-06	9.68625
ENSG00000127920.5	protein_coding	GNG11	2	OTTHUMG00000023411.4	chr7	HAVANA	gene	93921699	93928610	+	-1.22	0.429282	7.67062	-9.8518	1.86701e-08	2.86884e-06	9.56827
ENSG00000136244.11	protein_coding	IL6	2	OTTHUMG00000023178.5	chr7	HAVANA	gene	22725884	22732002	+	-4.70037	0.0384634	2.29116	-9.86114	1.84127e-08	2.85876e-06	9.37263
ENSG00000165507.8	protein_coding	C10orf10	2	OTTHUMG00000018063.3	chr10	HAVANA	gene	44970981	44978810	-	2.9458	7.70502	2.96333	9.57947	2.80961e-08	4.23003e-06	9.31634
ENSG00000261371.5	protein_coding	PECAM1	2	OTTHUMG00000175829.3	chr17	HAVANA	gene	64319415	64413776	-	-2.93852	0.130442	1.41887	-9.61806	2.65021e-08	4.03075e-06	9.26556
ENSG00000110427.15	protein_coding	KIAA1549L	1	OTTHUMG00000150410.7	chr11	HAVANA	gene	33376466	33674102	+	-1.70896	0.30588	2.57845	-9.43469	3.50327e-08	4.93616e-06	9.14582
ENSG00000185262.8	protein_coding	UBALD2	2	OTTHUMG00000132666.4	chr17	HAVANA	gene	76265202	76271299	+	-1.24011	0.423341	5.8897	-9.50898	3.12735e-08	4.61517e-06	9.10786
ENSG00000145817.16	protein_coding	YIPF5	2	OTTHUMG00000129679.5	chr5	HAVANA	gene	144158159	144170714	-	-1.25682	0.418465	7.21942	-9.52493	3.0523e-08	4.54945e-06	9.08287
ENSG00000164543.5	protein_coding	STK17A	2	OTTHUMG00000022825.3	chr7	HAVANA	gene	43582758	43626786	+	-1.34589	0.39341	5.68316	-9.474	3.29877e-08	4.77361e-06	9.07788
ENSG00000169297.7	protein_coding	NR0B1	2	OTTHUMG00000021323.1	chrX	HAVANA	gene	30304206	30309598	-	1.29536	2.45438	7.16014	9.47957	3.27085e-08	4.77361e-06	9.03157
ENSG00000123240.16	protein_coding	OPTN	2	OTTHUMG00000017690.6	chr10	HAVANA	gene	13099449	13138308	+	1.05843	2.08266	7.00816	9.45339	3.40439e-08	4.87909e-06	8.99239
ENSG00000177706.8	protein_coding	FAM20C	1	OTTHUMG00000151401.4	chr7	HAVANA	gene	192969	260745	+	-1.2329	0.425462	4.91171	-9.43335	3.51046e-08	4.93616e-06	8.99014
ENSG00000134686.18	protein_coding	PHC2	2	OTTHUMG00000004133.1	chr1	HAVANA	gene	33323623	33431052	-	-1.53907	0.344107	6.58886	-9.34732	4.00679e-08	5.58142e-06	8.82628
ENSG00000106780.8	protein_coding	MEGF9	2	OTTHUMG00000021039.1	chr9	HAVANA	gene	120600813	120714470	-	1.47846	2.78652	5.77875	9.29879	4.31875e-08	5.96027e-06	8.80763
ENSG00000114115.9	protein_coding	RBP1	1	OTTHUMG00000155751.4	chr3	HAVANA	gene	139517434	139539829	-	1.57455	2.97842	5.3525	9.22677	4.82947e-08	6.60396e-06	8.76131
ENSG00000170390.15	protein_coding	DCLK2	2	OTTHUMG00000161444.4	chr4	HAVANA	gene	150078274	150257457	+	1.56039	2.94934	5.7783	9.19555	5.0701e-08	6.8081e-06	8.69599
ENSG00000163132.6	protein_coding	MSX1	2	OTTHUMG00000090335.4	chr4	HAVANA	gene	4859666	4863936	+	-1.20302	0.434364	5.70749	-9.20105	5.02683e-08	6.8081e-06	8.62413
ENSG00000143384.12	protein_coding	MCL1	2	OTTHUMG00000034867.2	chr1	HAVANA	gene	150574551	150579738	-	-1.00119	0.499587	6.93221	-9.13657	5.55971e-08	7.26908e-06	8.47586
ENSG00000138166.5	protein_coding	DUSP5	2	OTTHUMG00000019040.1	chr10	HAVANA	gene	110497838	110511544	+	-3.21658	0.107575	1.28773	-9.15612	5.39215e-08	7.11238e-06	8.40946
ENSG00000164574.15	protein_coding	GALNT10	2	OTTHUMG00000130145.4	chr5	HAVANA	gene	154190730	154420984	+	-1.08097	0.472712	5.6499	-9.03044	6.56967e-08	8.51486e-06	8.36037
ENSG00000115648.13	protein_coding	MLPH	1	OTTHUMG00000133298.3	chr2	HAVANA	gene	237485428	237555318	+	-1.5583	0.339552	3.88624	-8.93164	7.68319e-08	9.78786e-06	8.29176
ENSG00000116016.13	protein_coding	EPAS1	1	OTTHUMG00000128818.24	chr2	HAVANA	gene	46293667	46386703	+	-2.70589	0.153266	2.89281	-8.87141	8.45752e-08	1.02513e-05	8.2839
ENSG00000176165.10	protein_coding	FOXG1	2	OTTHUMG00000140187.6	chr14	HAVANA	gene	28760330	28770277	+	-1.34482	0.393704	4.49036	-8.91061	7.94479e-08	9.95101e-06	8.26062
ENSG00000111252.10	protein_coding	SH2B3	1	OTTHUMG00000169550.5	chr12	HAVANA	gene	111405948	111451623	+	-1.66099	0.316221	4.4287	-8.8998	8.08289e-08	1.00396e-05	8.25833
ENSG00000137331.11	protein_coding	IER3	2	OTTHUMG00000031265.2	chr6	HAVANA	gene	30743199	30744554	-	-2.72769	0.150968	1.70979	-8.92528	7.76134e-08	9.80362e-06	8.21289
ENSG00000171951.4	protein_coding	SCG2	2	OTTHUMG00000133166.4	chr2	HAVANA	gene	223596940	223602503	-	-3.76444	0.0735854	1.0633	-8.9556	7.39611e-08	9.50337e-06	8.16276
ENSG00000171992.12	protein_coding	SYNPO	2	OTTHUMG00000130078.2	chr5	HAVANA	gene	150601080	150659220	+	1.55848	2.94544	6.30314	8.87872	8.35928e-08	1.02513e-05	8.13104
ENSG00000211448.11	protein_coding	DIO2	2	OTTHUMG00000171443.5	chr14	HAVANA	gene	80197527	80387757	-	2.19387	4.57531	5.8933	8.78467	9.71929e-08	1.14973e-05	8.063
ENSG00000118523.5	protein_coding	CTGF	2	OTTHUMG00000015573.2	chr6	HAVANA	gene	131948176	131951373	-	-2.06328	0.239272	4.22331	-8.72417	1.07148e-07	1.23801e-05	8.05164
ENSG00000123933.16	protein_coding	MXD4	2	OTTHUMG00000090243.5	chr4	HAVANA	gene	2247432	2262294	-	1.09524	2.13649	6.63887	8.8257	9.09954e-08	1.09378e-05	8.02007
ENSG00000253522.6	lincRNA	MIR3142HG	2	OTTHUMG00000163553.2	chr5	HAVANA	gene	160438594	160487426	+	-5.38457	0.0239377	0.687463	-9.17691	5.21981e-08	6.94655e-06	7.96932
ENSG00000136158.11	protein_coding	SPRY2	2	OTTHUMG00000017140.2	chr13	HAVANA	gene	80335976	80340951	-	-2.30422	0.202469	2.77007	-8.66954	1.17057e-07	1.33186e-05	7.96605
ENSG00000170681.6	protein_coding	MURC	2	OTTHUMG00000020368.2	chr9	HAVANA	gene	100578079	100587906	+	1.89972	3.7314	3.69785	8.67017	1.16937e-07	1.33186e-05	7.96472
ENSG00000187957.7	protein_coding	DNER	2	OTTHUMG00000153637.1	chr2	HAVANA	gene	229357629	229714558	-	-1.3781	0.384724	4.85676	-8.73902	1.0461e-07	1.21813e-05	7.91689
ENSG00000124875.9	protein_coding	CXCL6	1	OTTHUMG00000130010.3	chr4	HAVANA	gene	73836497	73849064	+	-0.95468	0.515956	8.17796	-8.81092	9.31788e-08	1.11106e-05	7.88278
ENSG00000167552.13	protein_coding	TUBA1A	1	OTTHUMG00000169511.3	chr12	HAVANA	gene	49184796	49189324	-	1.07313	2.104	8.12305	8.77159	9.92586e-08	1.16492e-05	7.85981
ENSG00000235109.7	protein_coding	ZSCAN31	1	OTTHUMG00000014518.5	chr6	HAVANA	gene	28324693	28356271	-	2.48232	5.58794	5.9116	8.63461	1.2389e-07	1.38841e-05	7.75194
ENSG00000164120.13	protein_coding	HPGD	1	OTTHUMG00000160772.7	chr4	HAVANA	gene	174490177	174523154	-	2.54177	5.82302	2.23893	8.50676	1.52681e-07	1.66111e-05	7.69217
ENSG00000113070.7	protein_coding	HBEGF	2	OTTHUMG00000129496.4	chr5	HAVANA	gene	140332843	140346631	-	-1.74512	0.298309	3.58514	-8.496	1.55403e-07	1.67059e-05	7.68659
ENSG00000182752.9	protein_coding	PAPPA	2	OTTHUMG00000021045.1	chr9	HAVANA	gene	116153804	116402322	+	-2.78477	0.145111	2.02291	-8.52345	1.48555e-07	1.6281e-05	7.68502
ENSG00000111057.10	protein_coding	KRT18	2	OTTHUMG00000169882.1	chr12	HAVANA	gene	52948871	52952901	+	-1.20856	0.432701	6.93541	-8.64472	1.2187e-07	1.37612e-05	7.67986
ENSG00000102048.15	protein_coding	ASB9	2	OTTHUMG00000021172.3	chrX	HAVANA	gene	15235288	15270467	-	1.47341	2.77678	3.91963	8.49012	1.56915e-07	1.67059e-05	7.65539
ENSG00000144655.14	protein_coding	CSRNP1	2	OTTHUMG00000131293.2	chr3	HAVANA	gene	39141855	39154562	-	-1.32093	0.400277	5.37847	-8.53244	1.46381e-07	1.61615e-05	7.59698
ENSG00000172965.15	lincRNA	AC068491.1	2	OTTHUMG00000150313.11	chr2	HAVANA	gene	111036776	111523376	-	-1.29069	0.408755	4.38858	-8.46582	1.63317e-07	1.69862e-05	7.54929
ENSG00000185022.11	protein_coding	MAFF	2	OTTHUMG00000151163.4	chr22	HAVANA	gene	38200767	38216511	+	-3.09441	0.117082	1.62074	-8.47909	1.59788e-07	1.68773e-05	7.54244
ENSG00000143786.7	protein_coding	CNIH3	2	OTTHUMG00000037634.3	chr1	HAVANA	gene	224434660	224740549	+	-3.85555	0.069082	1.62683	-8.55638	1.40753e-07	1.56562e-05	7.51341
ENSG00000154263.17	protein_coding	ABCA10	2	OTTHUMG00000164716.6	chr17	HAVANA	gene	69147214	69244846	-	-1.94309	0.260058	2.49156	-8.3856	1.86466e-07	1.86529e-05	7.51207
ENSG00000197971.14	protein_coding	MBP	1	OTTHUMG00000132874.8	chr18	HAVANA	gene	76978827	77133683	-	-1.39441	0.380399	3.71311	-8.4025	1.81319e-07	1.8294e-05	7.50263
ENSG00000019549.10	protein_coding	SNAI2	2	OTTHUMG00000149912.6	chr8	HAVANA	gene	48917604	48921740	-	2.56157	5.9035	4.12981	8.35287	1.96874e-07	1.93053e-05	7.4558
ENSG00000085063.15	protein_coding	CD59	1	OTTHUMG00000192410.1	chr11	HAVANA	gene	33703010	33736491	-	-0.916212	0.529899	7.32102	-8.4944	1.55814e-07	1.67059e-05	7.40287
ENSG00000168386.18	protein_coding	FILIP1L	1	OTTHUMG00000159055.3	chr3	HAVANA	gene	99830141	100114513	-	3.72567	13.2293	3.77916	8.31995	2.07954e-07	2.00576e-05	7.39847
ENSG00000130164.13	protein_coding	LDLR	1	OTTHUMG00000171935.8	chr19	HAVANA	gene	11089362	11133816	+	-1.18798	0.438918	5.52482	-8.40139	1.81651e-07	1.8294e-05	7.33049
ENSG00000073008.14	protein_coding	PVR	2	OTTHUMG00000151527.4	chr19	HAVANA	gene	44643798	44663583	+	-1.15709	0.448418	5.42626	-8.37882	1.88574e-07	1.8738e-05	7.32273
ENSG00000120885.21	protein_coding	CLU	1	OTTHUMG00000102114.7	chr8	HAVANA	gene	27596917	27615031	-	1.28839	2.44255	6.97655	8.40626	1.80192e-07	1.8294e-05	7.29999
ENSG00000221869.4	protein_coding	CEBPD	2	OTTHUMG00000162290.2	chr8	HAVANA	gene	47736909	47739086	-	-1.33987	0.395057	7.12204	-8.43688	1.71301e-07	1.76086e-05	7.29729
ENSG00000166750.9	protein_coding	SLFN5	1	OTTHUMG00000179858.2	chr17	HAVANA	gene	35243036	35273655	+	-1.47369	0.360059	4.51247	-8.30692	2.12522e-07	2.0176e-05	7.28958
ENSG00000127124.15	protein_coding	HIVEP3	2	OTTHUMG00000192539.3	chr1	HAVANA	gene	41506365	42035925	-	-1.44001	0.368565	4.59263	-8.30981	2.11498e-07	2.0176e-05	7.25244
ENSG00000049249.8	protein_coding	TNFRSF9	1	OTTHUMG00000001223.3	chr1	HAVANA	gene	7915894	7943165	-	1.03397	2.04765	6.29824	8.36031	1.94454e-07	1.91943e-05	7.24186
ENSG00000154127.9	protein_coding	UBASH3B	2	OTTHUMG00000166025.1	chr11	HAVANA	gene	122655675	122814473	+	-2.2351	0.212406	2.73873	-8.21311	2.48637e-07	2.27358e-05	7.22719
ENSG00000164951.15	protein_coding	PDP1	2	OTTHUMG00000164356.4	chr8	HAVANA	gene	93857807	93926066	+	-2.33026	0.198848	2.58005	-8.2081	2.50741e-07	2.27884e-05	7.22512
ENSG00000095752.6	protein_coding	IL11	2	OTTHUMG00000180789.2	chr19	HAVANA	gene	55364389	55370463	-	-4.23917	0.0529522	1.62844	-8.87125	8.45964e-08	1.02513e-05	7.2003
ENSG00000144583.4	protein_coding	2018-03-04	2	OTTHUMG00000154824.2	chr2	HAVANA	gene	216257865	216372027	-	-2.76221	0.147398	1.87339	-8.1973	2.5533e-07	2.30648e-05	7.16785
ENSG00000102804.14	protein_coding	TSC22D1	2	OTTHUMG00000016838.7	chr13	HAVANA	gene	44432143	44577147	-	-0.878562	0.543909	7.18984	-8.34266	2.00242e-07	1.95072e-05	7.13895
ENSG00000185338.5	protein_coding	SOCS1	2	OTTHUMG00000129792.2	chr16	HAVANA	gene	11254405	11256200	-	-3.29082	0.10218	0.81348	-8.19218	2.57537e-07	2.3124e-05	7.122
ENSG00000165685.8	protein_coding	TMEM52B	2	OTTHUMG00000168410.2	chr12	HAVANA	gene	10170542	10191801	+	1.70473	3.25969	3.91006	8.13232	2.8488e-07	2.51251e-05	7.09639
ENSG00000196460.13	protein_coding	RFX8	2	OTTHUMG00000130693.6	chr2	HAVANA	gene	101397361	101474703	-	-4.3921	0.0476262	0.2382	-8.46289	1.64107e-07	1.69862e-05	7.09054
ENSG00000173801.16	protein_coding	JUP	2	OTTHUMG00000133494.9	chr17	HAVANA	gene	41754604	41786931	-	-3.9258	0.0657987	1.5228	-8.22871	2.42214e-07	2.22852e-05	7.08691
ENSG00000168874.12	protein_coding	ATOH8	1	OTTHUMG00000130178.2	chr2	HAVANA	gene	85751344	85788066	+	1.83023	3.55593	4.06236	8.135	2.83593e-07	2.51251e-05	7.08028
ENSG00000115008.5	protein_coding	IL1A	2	OTTHUMG00000131315.2	chr2	HAVANA	gene	112773915	112784590	-	-4.79298	0.0360719	2.26075	-8.09523	3.03331e-07	2.61338e-05	7.03584
ENSG00000152128.13	protein_coding	TMEM163	2	OTTHUMG00000131713.2	chr2	HAVANA	gene	134455759	134719000	-	-2.90133	0.133848	1.71448	-8.09792	3.01952e-07	2.61338e-05	7.02743
ENSG00000112769.18	protein_coding	LAMA4	1	OTTHUMG00000015386.8	chr6	HAVANA	gene	112108760	112254939	-	-0.977047	0.508018	6.19893	-8.2446	2.35849e-07	2.18343e-05	7.02326
ENSG00000171729.13	protein_coding	TMEM51	1	OTTHUMG00000002046.4	chr1	HAVANA	gene	15152532	15220480	+	-1.7581	0.295638	3.96849	-8.10192	2.99911e-07	2.61338e-05	6.9783
ENSG00000213719.8	protein_coding	CLIC1	2	OTTHUMG00000031103.3	chr6	HAVANA	gene	31730581	31739763	-	-1.01409	0.495141	9.36254	-8.27993	2.22312e-07	2.09121e-05	6.97381
ENSG00000004660.14	protein_coding	CAMKK1	2	OTTHUMG00000090725.2	chr17	HAVANA	gene	3860315	3894891	-	1.31424	2.48672	4.25019	8.08164	3.10396e-07	2.65888e-05	6.94587
ENSG00000129355.6	protein_coding	CDKN2D	2	OTTHUMG00000180583.1	chr19	HAVANA	gene	10566462	10569059	-	-1.19089	0.438033	4.44835	-8.1169	2.92405e-07	2.5637e-05	6.93387
ENSG00000163297.16	protein_coding	ANTXR2	2	OTTHUMG00000151982.3	chr4	HAVANA	gene	79901149	80125454	-	-2.32895	0.199029	3.17465	-8.02868	3.39627e-07	2.8439e-05	6.91722
ENSG00000260604.2	lincRNA	RP1-140K8.5	2	OTTHUMG00000175886.3	chr6	HAVANA	gene	3904920	3911979	-	3.49129	11.2456	1.66888	8.47529	1.6079e-07	1.68773e-05	6.88707
ENSG00000118849.9	protein_coding	RARRES1	1	OTTHUMG00000158834.2	chr3	HAVANA	gene	158696892	158732696	-	1.43295	2.69999	4.40382	8.03936	3.33512e-07	2.80847e-05	6.85765
ENSG00000091136.13	protein_coding	LAMB1	1	OTTHUMG00000149966.3	chr7	HAVANA	gene	107923799	108003255	-	-1.04229	0.485556	7.18792	-8.16654	2.68899e-07	2.39996e-05	6.85523
ENSG00000204291.10	protein_coding	COL15A1	2	OTTHUMG00000020351.4	chr9	HAVANA	gene	98943179	99070792	+	-2.24577	0.210842	1.69834	-7.95884	3.82636e-07	3.13362e-05	6.81438
ENSG00000163762.6	protein_coding	TM4SF18	2	OTTHUMG00000159582.2	chr3	HAVANA	gene	149318498	149334414	-	-1.88138	0.271424	3.28148	-7.97981	3.69159e-07	3.03995e-05	6.80246
ENSG00000111912.19	protein_coding	NCOA7	2	OTTHUMG00000015513.6	chr6	HAVANA	gene	125781161	125932030	+	-1.25579	0.418763	5.50192	-8.07664	3.13043e-07	2.66623e-05	6.79921
ENSG00000171631.14	protein_coding	P2RY6	2	OTTHUMG00000167969.3	chr11	HAVANA	gene	73264505	73298617	+	-1.48579	0.357052	3.73048	-7.99614	3.59e-07	2.97272e-05	6.76747
ENSG00000143416.20	protein_coding	SELENBP1	2	OTTHUMG00000012498.25	chr1	HAVANA	gene	151364302	151372733	-	1.66065	3.16159	3.42988	7.86309	4.51057e-07	3.61452e-05	6.64559
ENSG00000114554.11	protein_coding	PLXNA1	2	OTTHUMG00000044222.3	chr3	HAVANA	gene	126988594	127037392	+	-1.31579	0.401706	5.64314	-7.99661	3.58715e-07	2.97272e-05	6.64386
ENSG00000143753.12	protein_coding	DEGS1	2	OTTHUMG00000037496.4	chr1	HAVANA	gene	224175756	224193441	+	-0.91677	0.529694	7.11505	-8.04131	3.32408e-07	2.80847e-05	6.63183
ENSG00000139318.7	protein_coding	DUSP6	2	OTTHUMG00000169912.4	chr12	HAVANA	gene	89347232	89353271	-	-6.3652	0.0121306	0.635771	-8.25892	2.30262e-07	2.14503e-05	6.57892
ENSG00000112299.7	protein_coding	VNN1	2	OTTHUMG00000015587.1	chr6	HAVANA	gene	132681590	132714049	-	-3.61659	0.0815261	0.401502	-7.88675	4.33042e-07	3.48892e-05	6.57598
ENSG00000050344.8	protein_coding	NFE2L3	2	OTTHUMG00000023882.4	chr7	HAVANA	gene	26152240	26187125	+	-1.90108	0.267743	3.2869	-7.83432	4.74016e-07	3.74779e-05	6.565
ENSG00000138735.15	protein_coding	PDE5A	2	OTTHUMG00000132971.6	chr4	HAVANA	gene	119494395	119628991	-	1.84902	3.60256	3.17284	7.76877	5.31017e-07	4.10094e-05	6.496
ENSG00000215808.2	lincRNA	RP11-371I1.2	2	OTTHUMG00000039532.1	chr1	HAVANA	gene	238480384	238486023	-	1.82135	3.53412	3.52862	7.7477	5.50828e-07	4.2103e-05	6.45696
ENSG00000181104.6	protein_coding	F2R	2	OTTHUMG00000131299.2	chr5	HAVANA	gene	76716043	76735781	+	-1.04663	0.484099	5.79738	-7.89987	4.23375e-07	3.43765e-05	6.44934
ENSG00000163435.15	protein_coding	ELF3	2	OTTHUMG00000035867.4	chr1	HAVANA	gene	202007945	202017188	+	1.19754	2.29349	6.13436	7.8985	4.24373e-07	3.43765e-05	6.42529
ENSG00000197467.14	protein_coding	COL13A1	1	OTTHUMG00000018394.5	chr10	HAVANA	gene	69801867	69964275	+	-3.17592	0.11065	0.547188	-7.85944	4.53905e-07	3.61789e-05	6.37883
ENSG00000176907.4	protein_coding	C8orf4	2	OTTHUMG00000164045.1	chr8	HAVANA	gene	40153455	40155308	+	1.33613	2.52472	5.39156	7.77682	5.23652e-07	4.08641e-05	6.35021
ENSG00000160285.14	protein_coding	LSS	1	OTTHUMG00000090633.9	chr21	HAVANA	gene	46188141	46228824	-	1.17654	2.26034	5.62364	7.78562	5.15718e-07	4.04567e-05	6.29078
ENSG00000152784.15	protein_coding	PRDM8	2	OTTHUMG00000160885.2	chr4	HAVANA	gene	80183879	80204329	+	-1.55687	0.339889	3.00131	-7.65359	6.4916e-07	4.88043e-05	6.27509
ENSG00000184254.16	protein_coding	ALDH1A3	2	OTTHUMG00000186439.3	chr15	HAVANA	gene	100877714	100916626	+	-1.37687	0.385054	5.30367	-7.75579	5.43129e-07	4.17286e-05	6.2379
ENSG00000166592.11	protein_coding	RRAD	2	OTTHUMG00000137511.4	chr16	HAVANA	gene	66921679	66925644	-	0.921878	1.89458	7.9439	7.83284	4.75232e-07	3.74779e-05	6.23186
ENSG00000111145.7	protein_coding	ELK3	2	OTTHUMG00000170364.3	chr12	HAVANA	gene	96194382	96269835	+	-1.09378	0.468531	5.80933	-7.77379	5.26414e-07	4.08657e-05	6.20557
ENSG00000116285.12	protein_coding	ERRFI1	1	OTTHUMG00000001221.3	chr1	HAVANA	gene	8004404	8026308	-	-2.02397	0.24588	3.69155	-7.62046	6.88007e-07	5.02684e-05	6.15914
ENSG00000071575.11	protein_coding	TRIB2	1	OTTHUMG00000090575.4	chr2	HAVANA	gene	12716889	12742734	+	-1.29453	0.40767	3.31857	-7.62115	6.87176e-07	5.02684e-05	6.15733
ENSG00000003436.15	protein_coding	TFPI	2	OTTHUMG00000132634.7	chr2	HAVANA	gene	187464230	187565760	-	-1.81997	0.283227	4.19605	-7.62919	6.77539e-07	4.99937e-05	6.15546
ENSG00000262454.3	lincRNA	MIR193BHG	2	OTTHUMG00000177423.4	chr16	HAVANA	gene	14301389	14331067	+	1.37573	2.59499	4.9839	7.64168	6.62859e-07	4.91538e-05	6.10853
ENSG00000162407.8	protein_coding	PLPP3	2	OTTHUMG00000008160.2	chr1	HAVANA	gene	56494747	56645301	-	1.16635	2.24443	4.78541	7.64459	6.59488e-07	4.91483e-05	6.08376
ENSG00000188643.10	protein_coding	S100A16	2	OTTHUMG00000013545.4	chr1	HAVANA	gene	153606886	153613145	-	-1.10411	0.46519	7.9745	-7.73333	5.6477e-07	4.29484e-05	6.048
ENSG00000110047.17	protein_coding	EHD1	1	OTTHUMG00000066832.17	chr11	HAVANA	gene	64851642	64888296	-	-1.11527	0.461603	5.47984	-7.65146	6.51597e-07	4.88043e-05	6.04424
ENSG00000142949.16	protein_coding	PTPRF	2	OTTHUMG00000007501.5	chr1	HAVANA	gene	43525187	43623666	+	-0.927663	0.525709	7.25893	-7.68854	6.10657e-07	4.62023e-05	6.00884
ENSG00000198246.8	protein_coding	SLC29A3	2	OTTHUMG00000018424.5	chr10	HAVANA	gene	71319258	71381423	+	1.41361	2.66402	4.41895	7.52165	8.18899e-07	5.84005e-05	5.9581
ENSG00000144749.13	protein_coding	LRIG1	2	OTTHUMG00000158727.1	chr3	HAVANA	gene	66378797	66501263	-	-1.68065	0.311942	3.38708	-7.47102	8.95793e-07	6.32786e-05	5.93155
ENSG00000173221.13	protein_coding	GLRX	2	OTTHUMG00000121167.3	chr5	HAVANA	gene	95751319	95823005	-	-1.13265	0.456078	4.70046	-7.55261	7.75298e-07	5.58252e-05	5.93039
ENSG00000151474.21	protein_coding	FRMD4A	1	OTTHUMG00000017708.8	chr10	HAVANA	gene	13643706	14462142	-	-1.26939	0.414836	3.86947	-7.44885	9.31797e-07	6.55115e-05	5.82423
ENSG00000166147.13	protein_coding	FBN1	1	OTTHUMG00000172218.2	chr15	HAVANA	gene	48408306	48645849	-	1.15134	2.2212	6.55712	7.55503	7.72001e-07	5.58252e-05	5.81937
ENSG00000112096.17	protein_coding	SOD2	1	OTTHUMG00000015940.4	chr6	HAVANA	gene	159669057	159745186	-	0.953341	1.93635	6.63977	7.55558	7.71243e-07	5.58252e-05	5.78322
ENSG00000153071.14	protein_coding	DAB2	2	OTTHUMG00000162043.4	chr5	HAVANA	gene	39371675	39462300	-	0.918563	1.89023	6.15643	7.51136	8.33947e-07	5.91904e-05	5.76679
ENSG00000039560.13	protein_coding	RAI14	2	OTTHUMG00000162019.3	chr5	HAVANA	gene	34656237	34832627	+	-0.814062	0.568778	6.63901	-7.53058	8.06076e-07	5.77623e-05	5.7499
ENSG00000100628.11	protein_coding	ASB2	1	OTTHUMG00000171298.2	chr14	HAVANA	gene	93934153	93976791	-	-4.79447	0.0360346	-2.36589	-8.31814	2.08583e-07	2.00576e-05	5.74325
ENSG00000006534.15	protein_coding	ALDH3B1	2	OTTHUMG00000154910.7	chr11	HAVANA	gene	68008578	68029282	+	1.47313	2.77624	4.46642	7.36171	1.0886e-06	7.50941e-05	5.73227
ENSG00000144802.11	protein_coding	NFKBIZ	1	OTTHUMG00000159194.18	chr3	HAVANA	gene	101827991	101861022	+	-1.0356	0.487814	4.69886	-7.43634	9.52787e-07	6.66727e-05	5.70361
ENSG00000198113.2	protein_coding	TOR4A	2	OTTHUMG00000131779.1	chr9	HAVANA	gene	137277749	137282641	+	-1.58285	0.333822	2.72203	-7.308	1.19873e-06	8.15848e-05	5.67089
ENSG00000036672.15	protein_coding	USP2	1	OTTHUMG00000166200.2	chr11	HAVANA	gene	119355215	119381726	-	1.42783	2.69041	3.29925	7.27621	1.26933e-06	8.56078e-05	5.63234
ENSG00000260877.2	lincRNA	RP11-211G23.2	2	OTTHUMG00000175507.2	chr11	HAVANA	gene	69371463	69372512	+	-4.81146	0.0356129	-1.75781	-8.27786	2.23081e-07	2.09121e-05	5.62439
ENSG00000140564.11	protein_coding	FURIN	2	OTTHUMG00000149831.3	chr15	HAVANA	gene	90868592	90883458	+	-1.06703	0.4773	5.35105	-7.40125	1.0143e-06	7.06452e-05	5.58928
ENSG00000178764.7	protein_coding	ZHX2	2	OTTHUMG00000165077.6	chr8	HAVANA	gene	122781394	122974512	+	1.4782	2.78602	3.79964	7.26443	1.29658e-06	8.67967e-05	5.56779
ENSG00000138100.13	protein_coding	TRIM54	2	OTTHUMG00000097078.3	chr2	HAVANA	gene	27282392	27307439	+	1.61726	3.06791	3.70555	7.24948	1.33201e-06	8.79686e-05	5.54586
ENSG00000181773.6	protein_coding	GPR3	2	OTTHUMG00000003397.2	chr1	HAVANA	gene	27392644	27395814	+	-3.88335	0.0677632	0.251022	-7.35674	1.09832e-06	7.50941e-05	5.53001
ENSG00000142910.15	protein_coding	TINAGL1	2	OTTHUMG00000003884.1	chr1	HAVANA	gene	31576485	31587686	+	-1.15576	0.44883	5.90774	-7.37276	1.06729e-06	7.39903e-05	5.51074
ENSG00000164116.16	protein_coding	GUCY1A3	2	OTTHUMG00000161700.3	chr4	HAVANA	gene	155666711	155732349	+	2.5162	5.72073	2.77497	7.13673	1.63421e-06	0.000105177	5.39625
ENSG00000134802.17	protein_coding	SLC43A3	2	OTTHUMG00000167113.3	chr11	HAVANA	gene	57406954	57427580	-	-1.36928	0.387084	5.16201	-7.24135	1.35173e-06	8.87557e-05	5.35708
ENSG00000138835.22	protein_coding	RGS3	1	OTTHUMG00000021048.9	chr9	HAVANA	gene	113444731	113597743	+	-1.09011	0.469726	4.83806	-7.24936	1.33231e-06	8.79686e-05	5.35696
ENSG00000163739.4	protein_coding	CXCL1	2	OTTHUMG00000160866.1	chr4	HAVANA	gene	73869393	73871242	+	-0.912938	0.531103	8.56098	-7.35811	1.09564e-06	7.50941e-05	5.34836
ENSG00000101670.11	protein_coding	LIPG	1	OTTHUMG00000179658.4	chr18	HAVANA	gene	49560699	49599182	+	-1.72879	0.301705	2.80349	-7.13575	1.63711e-06	0.000105177	5.31952
ENSG00000102265.11	protein_coding	TIMP1	2	OTTHUMG00000021447.2	chrX	HAVANA	gene	47582313	47586789	+	-0.914803	0.530416	7.00485	-7.28275	1.25445e-06	8.49889e-05	5.25922
ENSG00000256235.1	protein_coding	SMIM3	2	OTTHUMG00000163646.2	chr5	HAVANA	gene	150777946	150796734	+	-1.31005	0.403306	5.2784	-7.21576	1.41577e-06	9.21489e-05	5.24294
ENSG00000162645.12	protein_coding	GBP2	2	OTTHUMG00000010662.4	chr1	HAVANA	gene	89106132	89150456	-	0.919639	1.89164	4.98071	7.20086	1.4545e-06	9.42577e-05	5.23878
ENSG00000164283.12	protein_coding	ESM1	2	OTTHUMG00000097010.5	chr5	HAVANA	gene	54977864	55022671	-	-4.45115	0.0457161	0.361029	-7.26356	1.2986e-06	8.67967e-05	5.22229
ENSG00000131669.9	protein_coding	NINJ1	2	OTTHUMG00000020242.2	chr9	HAVANA	gene	93121489	93134288	-	0.872394	1.8307	7.42423	7.24873	1.33384e-06	8.79686e-05	5.20169
ENSG00000142634.12	protein_coding	EFHD2	2	OTTHUMG00000002254.1	chr1	HAVANA	gene	15409895	15430343	+	-0.753177	0.593295	6.68128	-7.23129	1.37653e-06	8.99879e-05	5.19546
ENSG00000107554.16	protein_coding	DNMBP	2	OTTHUMG00000018897.4	chr10	HAVANA	gene	99875577	100009919	-	-1.79897	0.28738	3.47681	-7.06027	1.87909e-06	0.000118678	5.18145
ENSG00000106123.11	protein_coding	EPHB6	2	OTTHUMG00000155707.4	chr7	HAVANA	gene	142855061	142871094	+	-1.28413	0.410618	3.59082	-7.06991	1.84621e-06	0.000117097	5.14119
ENSG00000107338.9	protein_coding	SHB	2	OTTHUMG00000019936.1	chr9	HAVANA	gene	37919134	38069211	-	-1.45786	0.364033	3.72553	-7.00588	2.07633e-06	0.000128414	5.06686
ENSG00000164512.17	protein_coding	ANKRD55	1	OTTHUMG00000162305.6	chr5	HAVANA	gene	56099678	56233359	-	-3.63949	0.0802427	0.427055	-7.12259	1.67684e-06	0.000107267	5.06428
ENSG00000120738.7	protein_coding	EGR1	2	OTTHUMG00000129197.2	chr5	HAVANA	gene	138465490	138469315	+	-3.15021	0.11264	0.339699	-7.04423	1.93512e-06	0.000121189	5.04773
ENSG00000243709.1	protein_coding	LEFTY1	2	OTTHUMG00000037443.5	chr1	HAVANA	gene	225886282	225911382	-	2.99146	7.95277	1.48848	6.9302	2.38727e-06	0.000144058	5.00158
ENSG00000189143.9	protein_coding	CLDN4	1	OTTHUMG00000023425.4	chr7	HAVANA	gene	73799542	73832693	+	-1.62031	0.325266	2.70764	-6.94334	2.32997e-06	0.000141172	4.989
ENSG00000138678.10	protein_coding	GPAT3	2	OTTHUMG00000130431.3	chr4	HAVANA	gene	83535914	83605875	+	-1.00298	0.498968	4.66267	-7.028	1.99362e-06	0.00012433	4.98187
ENSG00000171658.8	transcribed_unprocessed_pseudogene	RP11-443P15.2	1	OTTHUMG00000156640.2	chr3	HAVANA	gene	185959943	185980872	+	1.10889	2.15679	5.36167	7.04984	1.91534e-06	0.000120456	4.97903
ENSG00000250303.3	lincRNA	RP11-356J5.12	1	OTTHUMG00000167191.2	chr11	HAVANA	gene	112270749	112362534	+	1.30445	2.46989	5.19676	6.98032	2.17632e-06	0.000134042	4.9321
ENSG00000133321.10	protein_coding	RARRES3	2	OTTHUMG00000167850.2	chr11	HAVANA	gene	63536809	63546462	+	1.3749	2.5935	3.98732	6.9175	2.444e-06	0.000146391	4.91905
ENSG00000133030.20	protein_coding	MPRIP	1	OTTHUMG00000059276.10	chr17	HAVANA	gene	17042545	17217679	+	-0.834192	0.560897	5.75689	-7.01129	2.05575e-06	0.000127671	4.8423
ENSG00000104689.9	protein_coding	TNFRSF10A	2	OTTHUMG00000097843.2	chr8	HAVANA	gene	23190452	23225126	-	-1.5604	0.339056	2.86094	-6.79829	3.05028e-06	0.000174863	4.78028
ENSG00000162692.10	protein_coding	VCAM1	2	OTTHUMG00000010982.3	chr1	HAVANA	gene	100719742	100739045	+	3.41679	10.6796	1.70325	6.82251	2.91556e-06	0.000167786	4.74637
ENSG00000176170.13	protein_coding	SPHK1	2	OTTHUMG00000180177.2	chr17	HAVANA	gene	76376584	76387860	+	-1.26833	0.415141	4.30852	-6.8692	2.67294e-06	0.000158096	4.73168
ENSG00000110660.14	protein_coding	SLC35F2	2	OTTHUMG00000166366.3	chr11	HAVANA	gene	107790991	107928293	-	-0.827026	0.56369	5.67535	-6.94394	2.3274e-06	0.000141172	4.72463
ENSG00000146242.8	protein_coding	TPBG	2	OTTHUMG00000015103.1	chr6	HAVANA	gene	82363206	82370828	+	-1.01192	0.495885	4.70673	-6.89315	2.55678e-06	0.000151828	4.71778
ENSG00000150347.15	protein_coding	ARID5B	2	OTTHUMG00000018298.2	chr10	HAVANA	gene	61901300	62096944	+	1.18758	2.2777	4.1616	6.82443	2.90514e-06	0.000167786	4.7021
ENSG00000138413.13	protein_coding	IDH1	2	OTTHUMG00000132943.14	chr2	HAVANA	gene	208236227	208266074	-	0.880596	1.84114	6.61049	6.94397	2.32728e-06	0.000141172	4.68838
ENSG00000091844.7	protein_coding	RGS17	2	OTTHUMG00000015858.2	chr6	HAVANA	gene	153004459	153131249	-	-1.57055	0.336681	2.74152	-6.77104	3.20965e-06	0.000182595	4.6569
ENSG00000124225.15	protein_coding	PMEPA1	1	OTTHUMG00000032831.3	chr20	HAVANA	gene	57648392	57711536	-	-0.79726	0.575441	7.55363	-6.95733	2.27056e-06	0.00013927	4.63765
ENSG00000168765.16	protein_coding	GSTM4	2	OTTHUMG00000011642.1	chr1	HAVANA	gene	109656081	109674836	+	1.24441	2.36922	7.00732	6.91715	2.44557e-06	0.000146391	4.62048
ENSG00000188766.12	protein_coding	SPRED3	2	OTTHUMG00000182082.4	chr19	HAVANA	gene	38388421	38399587	+	-3.29228	0.102076	-0.166526	-6.82413	2.90676e-06	0.000167786	4.59104
ENSG00000101187.15	protein_coding	SLCO4A1	2	OTTHUMG00000032923.3	chr20	HAVANA	gene	62642445	62685785	+	-1.31966	0.40063	4.04507	-6.79505	3.06878e-06	0.00017525	4.57395
ENSG00000081277.12	protein_coding	PKP1	2	OTTHUMG00000035729.3	chr1	HAVANA	gene	201283452	201332993	+	1.71493	3.28281	4.05377	6.67836	3.81952e-06	0.000212425	4.52898
ENSG00000237686.6	antisense	RP5-1120P11.1	2	OTTHUMG00000014752.2	chr6	HAVANA	gene	43995723	44074652	-	-2.27162	0.207098	1.67335	-6.63945	4.11038e-06	0.000224415	4.5159
ENSG00000180801.13	protein_coding	ARSJ	2	OTTHUMG00000161067.3	chr4	HAVANA	gene	113900284	113979727	-	-1.28958	0.409069	3.49952	-6.67951	3.81125e-06	0.000212425	4.48098
ENSG00000145901.14	protein_coding	TNIP1	1	OTTHUMG00000163722.5	chr5	HAVANA	gene	151029945	151093577	-	-0.861242	0.550479	7.30194	-6.86128	2.71256e-06	0.000159805	4.46784
ENSG00000133935.6	protein_coding	C14orf1	2	OTTHUMG00000171488.1	chr14	HAVANA	gene	75649791	75661189	-	0.878054	1.83789	6.57525	6.83428	2.85229e-06	0.000166068	4.46585
ENSG00000170961.6	protein_coding	HAS2	2	OTTHUMG00000164953.2	chr8	HAVANA	gene	121612116	121641390	-	-5.01962	0.0308279	-1.28746	-7.09767	1.75486e-06	0.000111779	4.43649
ENSG00000166068.12	protein_coding	SPRED1	2	OTTHUMG00000172377.3	chr15	HAVANA	gene	38252326	38357249	+	-1.88405	0.270921	2.94245	-6.61099	4.33758e-06	0.00023256	4.41227
ENSG00000070882.12	protein_coding	OSBPL3	2	OTTHUMG00000023277.7	chr7	HAVANA	gene	24796539	24981634	-	-1.24548	0.421767	3.13221	-6.6241	4.23137e-06	0.000228509	4.39564
ENSG00000121966.6	protein_coding	CXCR4	2	OTTHUMG00000153583.1	chr2	HAVANA	gene	136114349	136118165	-	2.83021	7.11176	1.06052	6.65707	3.97588e-06	0.000218673	4.39085
ENSG00000206073.10	protein_coding	SERPINB4	2	OTTHUMG00000060405.4	chr18	HAVANA	gene	63637259	63644298	-	-2.60714	0.164124	0.374841	-6.59769	4.44818e-06	0.000235944	4.34687
ENSG00000263528.7	protein_coding	IKBKE	2	OTTHUMG00000184613.2	chr1	HAVANA	gene	206470476	206496889	+	0.968217	1.95642	4.76538	6.69501	3.70171e-06	0.000207421	4.34277
ENSG00000138316.10	protein_coding	ADAMTS14	2	OTTHUMG00000018414.1	chr10	HAVANA	gene	70672803	70762441	+	-3.40752	0.0942397	-0.0192897	-6.60656	4.37411e-06	0.000233678	4.29678
ENSG00000136869.14	protein_coding	TLR4	2	OTTHUMG00000021046.6	chr9	HAVANA	gene	117704175	117724730	+	-2.50074	0.176686	0.933932	-6.52593	5.09769e-06	0.000263614	4.28755
ENSG00000157227.12	protein_coding	MMP14	1	OTTHUMG00000028704.4	chr14	HAVANA	gene	22836557	22849027	+	-0.967542	0.511376	6.11779	-6.71048	3.59555e-06	0.000202999	4.25495
ENSG00000185483.11	protein_coding	ROR1	2	OTTHUMG00000009022.1	chr1	HAVANA	gene	63774022	64181498	+	-1.10986	0.463338	4.55161	-6.62523	4.22231e-06	0.000228509	4.24026
ENSG00000150556.16	protein_coding	LYPD6B	1	OTTHUMG00000153743.3	chr2	HAVANA	gene	149038107	149215262	+	-1.62062	0.325196	2.44514	-6.48287	5.53404e-06	0.000277727	4.22277
ENSG00000249306.5	lincRNA	RP11-267A15.1	2	OTTHUMG00000163128.3	chr5	HAVANA	gene	174336295	174532457	+	-1.65944	0.316563	2.71448	-6.51635	5.19157e-06	0.000266829	4.21752
ENSG00000108405.3	protein_coding	P2RX1	2	OTTHUMG00000177673.1	chr17	HAVANA	gene	3896592	3916500	-	-3.25689	0.104611	-0.0533341	-6.63713	4.12842e-06	0.000224577	4.21654
ENSG00000144136.10	protein_coding	SLC20A1	1	OTTHUMG00000131317.4	chr2	HAVANA	gene	112645857	112663827	+	-1.64354	0.320069	5.29666	-6.6499	4.03005e-06	0.000220838	4.19408
ENSG00000084734.8	protein_coding	GCKR	1	OTTHUMG00000128426.2	chr2	HAVANA	gene	27496842	27523684	+	-2.22876	0.213341	1.21401	-6.46446	5.73225e-06	0.00028575	4.18125
ENSG00000196639.6	protein_coding	HRH1	2	OTTHUMG00000129719.5	chr3	HAVANA	gene	11137093	11263557	+	-1.66901	0.314468	2.93422	-6.48903	5.46935e-06	0.000276538	4.17679
ENSG00000079459.12	protein_coding	FDFT1	1	OTTHUMG00000090801.6	chr8	HAVANA	gene	11795573	11839309	+	0.851849	1.80481	7.25193	6.699	3.67398e-06	0.000206644	4.1685
ENSG00000115718.17	protein_coding	PROC	2	OTTHUMG00000131528.5	chr2	HAVANA	gene	127418427	127429246	+	4.53737	23.2212	0.929082	6.90009	2.52408e-06	0.000150486	4.15293
ENSG00000186480.12	protein_coding	INSIG1	1	OTTHUMG00000151330.5	chr7	HAVANA	gene	155297776	155310235	+	0.7737	1.70965	6.45371	6.66544	3.91368e-06	0.00021605	4.1418
ENSG00000149218.4	protein_coding	ENDOD1	2	OTTHUMG00000167835.1	chr11	HAVANA	gene	95089810	95132645	+	-0.994348	0.501963	4.29466	-6.5719	4.67113e-06	0.000246018	4.12876
ENSG00000119408.16	protein_coding	NEK6	2	OTTHUMG00000020650.2	chr9	HAVANA	gene	124257606	124353307	+	-1.07782	0.473744	5.39703	-6.60428	4.39305e-06	0.000233851	4.09936
ENSG00000150687.11	protein_coding	PRSS23	2	OTTHUMG00000167226.3	chr11	HAVANA	gene	86791059	86952910	+	0.763241	1.6973	8.4774	6.66892	3.88807e-06	0.000215434	4.07695
ENSG00000169435.13	protein_coding	RASSF6	2	OTTHUMG00000130007.2	chr4	HAVANA	gene	73571550	73620631	-	1.73583	3.33071	2.83118	6.40795	6.38785e-06	0.000314228	4.06879
ENSG00000163513.17	protein_coding	TGFBR2	2	OTTHUMG00000130569.3	chr3	HAVANA	gene	30606502	30694142	+	-2.22019	0.214613	3.45875	-6.47729	5.59335e-06	0.000279761	4.04207
ENSG00000008517.16	protein_coding	IL32	2	OTTHUMG00000167498.6	chr16	HAVANA	gene	3065297	3082192	+	1.46377	2.75828	5.18468	6.51247	5.23018e-06	0.000267306	4.0414
ENSG00000013297.11	protein_coding	CLDN11	1	OTTHUMG00000158940.4	chr3	HAVANA	gene	170418865	170454733	+	-0.962862	0.513038	6.76449	-6.61232	4.3267e-06	0.00023256	4.03749
ENSG00000197142.10	protein_coding	ACSL5	2	OTTHUMG00000019060.1	chr10	HAVANA	gene	112374018	112428380	+	-0.859521	0.551136	5.06899	-6.55999	4.77795e-06	0.000249878	4.02944
ENSG00000243444.7	protein_coding	PALM2	2	OTTHUMG00000020479.3	chr9	HAVANA	gene	109640788	109946703	+	-2.06213	0.239462	1.29622	-6.38285	6.70357e-06	0.000327596	4.02215
ENSG00000242258.1	lincRNA	RP11-511P7.2	2	OTTHUMG00000158321.1	chr7	HAVANA	gene	150433654	150448140	+	-1.81873	0.283471	0.995001	-6.3645	6.9446e-06	0.000336069	4.02067
ENSG00000006468.13	protein_coding	ETV1	1	OTTHUMG00000152403.6	chr7	HAVANA	gene	13891228	13991425	-	-3.74605	0.0745293	0.0325145	-6.44538	5.9454e-06	0.000294406	3.99214
ENSG00000181634.7	protein_coding	TNFSF15	2	OTTHUMG00000021011.2	chr9	HAVANA	gene	114784635	114806126	-	-4.65084	0.0398068	0.155535	-6.44925	5.90147e-06	0.000293205	3.95605
ENSG00000112972.14	protein_coding	HMGCS1	2	OTTHUMG00000162231.2	chr5	HAVANA	gene	43289395	43313512	-	1.43545	2.70467	3.49186	6.36942	6.87903e-06	0.00033398	3.9491
ENSG00000213344.2	processed_pseudogene	RP11-221N13.1	1	OTTHUMG00000168873.1	chr12	HAVANA	gene	65645992	65646462	-	-5.51035	0.0219391	-1.48106	-6.83745	2.83553e-06	0.000165739	3.94589
ENSG00000165233.17	protein_coding	CARD19	2	OTTHUMG00000020243.3	chr9	HAVANA	gene	93096218	93113283	+	-0.87018	0.547079	5.48256	-6.52453	5.11134e-06	0.000263614	3.94054
ENSG00000277734.7	TR_C_gene	TRAC	2	OTTHUMG00000028683.7	chr14	HAVANA	gene	22547506	22552154	+	-4.44645	0.0458655	-1.36476	-6.85819	2.72822e-06	0.000160095	3.92511
ENSG00000113161.15	protein_coding	HMGCR	1	OTTHUMG00000102069.5	chr5	HAVANA	gene	75336329	75362104	+	1.06929	2.09839	5.16412	6.48546	5.50666e-06	0.000277287	3.92282
ENSG00000136830.11	protein_coding	FAM129B	2	OTTHUMG00000020705.2	chr9	HAVANA	gene	127505339	127578989	-	-1.22566	0.427602	7.31109	-6.56952	4.69229e-06	0.000246263	3.91183
ENSG00000184371.13	protein_coding	CSF1	1	OTTHUMG00000011646.3	chr1	HAVANA	gene	109910242	109930992	+	1.05829	2.08247	6.76655	6.54139	4.9499e-06	0.000257966	3.9062
ENSG00000116729.13	protein_coding	WLS	2	OTTHUMG00000009153.4	chr1	HAVANA	gene	68098473	68233120	-	-0.897884	0.536673	5.87587	-6.52809	5.07677e-06	0.000263614	3.90508
ENSG00000128805.14	protein_coding	ARHGAP22	1	OTTHUMG00000018176.5	chr10	HAVANA	gene	48446034	48656265	-	-1.60921	0.327777	2.96267	-6.33114	7.40598e-06	0.000353802	3.89505
ENSG00000115414.18	protein_coding	FN1	2	OTTHUMG00000133054.6	chr2	HAVANA	gene	215360440	215436172	-	-0.862708	0.549919	9.66557	-6.588	4.53062e-06	0.000239464	3.86914
ENSG00000222041.11	lincRNA	CYTOR	1	OTTHUMG00000130273.15	chr2	HAVANA	gene	87454781	87636740	+	-0.943126	0.520105	6.20471	-6.51181	5.23672e-06	0.000267306	3.86752
ENSG00000129116.17	protein_coding	PALLD	1	OTTHUMG00000161097.9	chr4	HAVANA	gene	168497066	168928457	+	0.974128	1.96445	6.33133	6.49682	5.38863e-06	0.000274121	3.84173
ENSG00000162897.14	protein_coding	FCAMR	2	OTTHUMG00000036579.3	chr1	HAVANA	gene	206957965	206970625	-	2.94539	7.70286	1.31317	6.27842	8.20102e-06	0.000384391	3.83684
ENSG00000135643.4	protein_coding	KCNMB4	2	OTTHUMG00000167586.1	chr12	HAVANA	gene	70366276	70434292	+	1.05032	2.071	4.56019	6.4184	6.26103e-06	0.000309009	3.83362
ENSG00000100100.12	protein_coding	PIK3IP1	2	OTTHUMG00000151256.2	chr22	HAVANA	gene	31281593	31292534	-	3.36133	10.2769	2.1997	6.33401	7.36501e-06	0.000353802	3.75088
ENSG00000091482.6	protein_coding	SMPX	2	OTTHUMG00000021235.4	chrX	HAVANA	gene	21705972	21758163	-	1.8966	3.72334	2.53725	6.20631	9.43408e-06	0.000435341	3.72823
ENSG00000137309.19	protein_coding	HMGA1	2	OTTHUMG00000014539.3	chr6	HAVANA	gene	34236873	34246231	+	-0.908426	0.532766	9.48348	-6.48865	5.47325e-06	0.000276538	3.68037
ENSG00000162458.12	protein_coding	FBLIM1	2	OTTHUMG00000003079.7	chr1	HAVANA	gene	15756607	15786594	+	-1.02842	0.490247	5.12932	-6.36947	6.87839e-06	0.00033398	3.66731
ENSG00000137673.8	protein_coding	MMP7	2	OTTHUMG00000048193.2	chr11	HAVANA	gene	102520508	102530753	-	2.87224	7.322	3.04479	6.17519	1.00242e-05	0.000452759	3.65436
ENSG00000268362.5	lincRNA	CTD-2017D11.1	2	OTTHUMG00000183392.1	chr19	HAVANA	gene	24033445	24066909	+	1.0833	2.11887	4.86938	6.30402	7.80449e-06	0.000370465	3.61969
ENSG00000144821.9	protein_coding	MYH15	2	OTTHUMG00000159226.2	chr3	HAVANA	gene	108380369	108529322	-	-2.4643	0.181205	0.15738	-6.1619	1.02877e-05	0.000463256	3.61474
ENSG00000173442.12	protein_coding	EHBP1L1	2	OTTHUMG00000166520.4	chr11	HAVANA	gene	65576038	65592650	+	-0.987734	0.504269	5.08808	-6.3384	7.30286e-06	0.000352263	3.61058
ENSG00000145632.14	protein_coding	PLK2	2	OTTHUMG00000097047.2	chr5	HAVANA	gene	58453982	58460260	-	1.03084	2.04321	5.77929	6.33279	7.38245e-06	0.000353802	3.60884
ENSG00000163347.5	protein_coding	CLDN1	2	OTTHUMG00000156214.2	chr3	HAVANA	gene	190305701	190322475	-	-1.93016	0.262399	2.565	-6.14796	1.05719e-05	0.000471777	3.59931
ENSG00000169242.11	protein_coding	EFNA1	2	OTTHUMG00000035312.2	chr1	HAVANA	gene	155127460	155134857	+	2.60461	6.08229	1.43048	6.2025	9.50433e-06	0.000437229	3.59225
ENSG00000113739.10	protein_coding	STC2	1	OTTHUMG00000130542.4	chr5	HAVANA	gene	173314713	173329503	-	-1.08492	0.47142	5.48749	-6.2982	7.89289e-06	0.000373471	3.55878
ENSG00000168016.14	protein_coding	TRANK1	1	OTTHUMG00000155848.6	chr3	HAVANA	gene	36826820	36945098	-	1.8912	3.70945	3.8047	6.18003	9.92991e-06	0.000449864	3.55845
ENSG00000006327.13	protein_coding	TNFRSF12A	2	OTTHUMG00000129001.2	chr16	HAVANA	gene	3018445	3022383	+	-0.777425	0.583407	8.57825	-6.40159	6.4663e-06	0.00031704	3.5404
ENSG00000119681.11	protein_coding	LTBP2	1	OTTHUMG00000171476.3	chr14	HAVANA	gene	74498170	74612378	-	-1.64418	0.319929	2.09006	-6.1051	1.14973e-05	0.000502544	3.51633
ENSG00000180398.11	protein_coding	MCFD2	1	OTTHUMG00000153100.3	chr2	HAVANA	gene	46901870	46941855	-	-1.16632	0.445556	5.26621	-6.29384	7.95971e-06	0.000375441	3.5119
ENSG00000117152.13	protein_coding	RGS4	2	OTTHUMG00000034417.5	chr1	HAVANA	gene	163068775	163076802	+	-1.54387	0.342964	1.96102	-6.11252	1.13314e-05	0.00049675	3.50885
ENSG00000279095.1	TEC	AC092066.1	2	OTTHUMG00000188264.1	chr19	HAVANA	gene	44664131	44666158	+	-1.05852	0.480124	4.63608	-6.24173	8.80607e-06	0.00041017	3.50731
ENSG00000176438.12	protein_coding	SYNE3	2	OTTHUMG00000171632.4	chr14	HAVANA	gene	95407266	95475836	-	-3.41411	0.0938101	0.11846	-6.13473	1.08491e-05	0.000480827	3.49775
ENSG00000180340.6	protein_coding	FZD2	2	OTTHUMG00000181819.1	chr17	HAVANA	gene	44557459	44559570	+	1.14723	2.21489	4.93716	6.24367	8.77297e-06	0.000409909	3.49644
ENSG00000237441.9	protein_coding	RGL2	2	OTTHUMG00000031072.4	chr6	HAVANA	gene	33291654	33299324	-	-1.08492	0.471419	4.31871	-6.21466	9.28209e-06	0.000429657	3.47295
ENSG00000136732.15	protein_coding	GYPC	1	OTTHUMG00000131464.3	chr2	HAVANA	gene	126655933	126696670	+	-1.50228	0.352994	2.98438	-6.06828	1.23593e-05	0.000530881	3.4236
ENSG00000067082.14	protein_coding	KLF6	2	OTTHUMG00000017567.1	chr10	HAVANA	gene	3775996	3785281	-	-0.885651	0.541243	6.43368	-6.27997	8.17634e-06	0.000384391	3.42067
ENSG00000067798.15	protein_coding	NAV3	1	OTTHUMG00000170001.4	chr12	HAVANA	gene	77324641	78213008	+	-1.88532	0.270684	2.45401	-6.06493	1.2441e-05	0.000532856	3.41917
ENSG00000145358.6	protein_coding	DDIT4L	2	OTTHUMG00000161019.2	chr4	HAVANA	gene	100185870	100190782	-	2.89117	7.41874	1.35651	6.03774	1.31249e-05	0.00055734	3.40228
ENSG00000128283.6	protein_coding	CDC42EP1	2	OTTHUMG00000150591.5	chr22	HAVANA	gene	37560447	37569405	+	-1.07758	0.473822	5.50598	-6.229	9.02661e-06	0.000419133	3.40198
ENSG00000173852.14	protein_coding	DPY19L1	2	OTTHUMG00000154888.4	chr7	HAVANA	gene	34928876	35038271	-	0.818857	1.76401	7.34271	6.30579	7.77772e-06	0.000370374	3.39677
ENSG00000105327.17	protein_coding	BBC3	2	OTTHUMG00000183489.2	chr19	HAVANA	gene	47220822	47232766	-	0.976974	1.96833	4.51142	6.14269	1.06813e-05	0.00047524	3.38169
ENSG00000233384.2	bidirectional_promoter_lncRNA	RP11-100E13.1	1	OTTHUMG00000037718.2	chr1	HAVANA	gene	224611404	224616220	-	-1.51683	0.349454	1.21563	-6.03934	1.30836e-05	0.000557174	3.37014
ENSG00000171056.7	protein_coding	SOX7	2	OTTHUMG00000090585.1	chr8	HAVANA	gene	10723768	10730512	-	-1.25311	0.419543	3.65395	-6.1273	1.10079e-05	0.00048399	3.36933
ENSG00000018408.14	protein_coding	WWTR1	1	OTTHUMG00000159614.13	chr3	HAVANA	gene	149517235	149736714	-	-1.27965	0.411896	4.94539	-6.18929	9.7523e-06	0.000445883	3.32665
ENSG00000104365.13	protein_coding	IKBKB	2	OTTHUMG00000164092.2	chr8	HAVANA	gene	42271302	42332653	+	-1.1255	0.458342	3.69868	-6.08219	1.20262e-05	0.000518066	3.32321
ENSG00000168916.15	protein_coding	ZNF608	1	OTTHUMG00000162999.4	chr5	HAVANA	gene	124636913	124748807	-	1.76918	3.4086	2.40357	5.96996	1.50043e-05	0.000621222	3.28735
ENSG00000065534.18	protein_coding	MYLK	1	OTTHUMG00000141304.13	chr3	HAVANA	gene	123610049	123884331	-	1.35939	2.56577	2.92875	5.9839	1.45965e-05	0.00060771	3.26735
ENSG00000108840.15	protein_coding	HDAC5	1	OTTHUMG00000181806.2	chr17	HAVANA	gene	44076746	44123702	-	1.00137	2.0019	5.16429	6.13368	1.08714e-05	0.000480827	3.25108
ENSG00000223609.8	protein_coding	HBD	1	OTTHUMG00000066674.4	chr11	HAVANA	gene	5232678	5243657	-	5.13097	35.041	-0.358939	6.75154	3.32898e-06	0.000188664	3.24505
ENSG00000261253.2	processed_transcript	AC137932.6	2	OTTHUMG00000175559.3	chr16	HAVANA	gene	89321133	89325110	+	-3.23334	0.106333	0.366689	-6.02851	1.3366e-05	0.000563479	3.23171
ENSG00000172840.6	protein_coding	PDP2	2	OTTHUMG00000137512.8	chr16	HAVANA	gene	66878589	66895754	+	-0.870313	0.547028	5.13611	-6.15049	1.05196e-05	0.000470855	3.23168
ENSG00000071054.16	protein_coding	MAP4K4	2	OTTHUMG00000155394.5	chr2	HAVANA	gene	101696850	101894689	+	-0.746413	0.596084	6.41474	-6.18768	9.783e-06	0.000445919	3.20421
ENSG00000170231.15	protein_coding	FABP6	2	OTTHUMG00000130329.6	chr5	HAVANA	gene	160187367	160238735	+	2.34674	5.08672	2.38567	5.91993	1.65688e-05	0.000671083	3.17683
ENSG00000081041.8	protein_coding	CXCL2	2	OTTHUMG00000160865.2	chr4	HAVANA	gene	74097035	74099293	-	-0.881913	0.542648	6.83297	-6.18518	9.83066e-06	0.000446726	3.16799
ENSG00000111799.20	protein_coding	COL12A1	1	OTTHUMG00000015051.7	chr6	HAVANA	gene	75084326	75206051	-	0.806128	1.74851	6.94236	6.15345	1.04591e-05	0.000469555	3.14453
ENSG00000001084.11	protein_coding	GCLC	1	OTTHUMG00000160220.12	chr6	HAVANA	gene	53497341	53616970	-	0.86464	1.82089	6.15717	6.12893	1.0973e-05	0.000483882	3.11869
ENSG00000235884.3	lincRNA	RP11-77I22.3	2	OTTHUMG00000169309.1	chr12	HAVANA	gene	30795681	30802711	+	-1.6993	0.307936	2.48028	-5.89554	1.73915e-05	0.000698708	3.11404
ENSG00000161011.19	protein_coding	SQSTM1	2	OTTHUMG00000150643.79	chr5	HAVANA	gene	179806398	179838078	+	0.962189	1.94826	5.6137	6.08531	1.19528e-05	0.000516395	3.10497
ENSG00000111348.8	protein_coding	ARHGDIB	2	OTTHUMG00000168742.3	chr12	HAVANA	gene	14942017	14961728	-	-0.955588	0.515631	4.02501	-6.03186	1.32778e-05	0.000562233	3.1021
ENSG00000244026.6	transcribed_unprocessed_pseudogene	FAM86DP	2	OTTHUMG00000158855.2	chr3	HAVANA	gene	75421552	75435110	-	-1.38829	0.382019	3.22513	-5.92787	1.63097e-05	0.000664195	3.08187
ENSG00000140931.19	protein_coding	CMTM3	1	OTTHUMG00000137503.8	chr16	HAVANA	gene	66603874	66613892	+	-0.881585	0.542771	5.96835	-6.09635	1.16965e-05	0.000509755	3.05249
ENSG00000179431.6	protein_coding	FJX1	2	OTTHUMG00000166310.1	chr11	HAVANA	gene	35618419	35620868	+	-0.946002	0.519069	5.28547	-6.02787	1.33829e-05	0.000563479	3.02224
ENSG00000100439.10	protein_coding	ABHD4	1	OTTHUMG00000028686.7	chr14	HAVANA	gene	22598237	22613215	+	1.38926	2.61944	6.37719	6.05824	1.26059e-05	0.00053837	3.02114
ENSG00000110921.13	protein_coding	MVK	2	OTTHUMG00000169256.5	chr12	HAVANA	gene	109573255	109598117	+	1.22376	2.33554	4.15064	5.95302	1.55164e-05	0.000638873	2.99892
ENSG00000070718.11	protein_coding	AP3M2	1	OTTHUMG00000164060.5	chr8	HAVANA	gene	42152946	42171673	+	-1.0974	0.467358	3.50888	-5.91447	1.67495e-05	0.000676564	2.9888
ENSG00000234155.1	lincRNA	RP11-30P6.6	2	OTTHUMG00000015137.1	chr6	HAVANA	gene	85387219	85390186	-	-4.79211	0.0360938	-1.18364	-6.19567	9.63181e-06	0.00044173	2.9821
ENSG00000110911.15	protein_coding	SLC11A2	1	OTTHUMG00000169493.10	chr12	HAVANA	gene	50979401	51028566	-	-0.95985	0.51411	3.92421	-5.94441	1.57834e-05	0.000646605	2.95511
ENSG00000158050.4	protein_coding	DUSP2	2	OTTHUMG00000130456.2	chr2	HAVANA	gene	96143166	96145440	-	1.01434	2.01997	5.43535	5.99047	1.4408e-05	0.000603235	2.93842
ENSG00000075420.12	protein_coding	FNDC3B	2	OTTHUMG00000156761.5	chr3	HAVANA	gene	172039628	172401665	+	-1.21872	0.429665	4.85157	-5.9659	1.51256e-05	0.000624507	2.9184
ENSG00000121068.13	protein_coding	TBX2	2	OTTHUMG00000156986.3	chr17	HAVANA	gene	61399896	61409466	+	-1.29569	0.40734	4.20987	-5.92315	1.64631e-05	0.000668619	2.91178
ENSG00000113140.10	protein_coding	SPARC	1	OTTHUMG00000130122.4	chr5	HAVANA	gene	151661096	151687165	-	0.677751	1.59964	9.57988	6.09246	1.1786e-05	0.00051067	2.90544
ENSG00000135929.8	protein_coding	CYP27A1	1	OTTHUMG00000048238.6	chr2	HAVANA	gene	218781749	218815293	+	1.33166	2.51693	3.96644	5.85308	1.89263e-05	0.000747778	2.89964
ENSG00000116852.14	protein_coding	KIF21B	2	OTTHUMG00000035787.5	chr1	HAVANA	gene	200969390	201023700	-	-1.40884	0.376613	2.49271	-5.79408	2.1294e-05	0.000830857	2.87673
ENSG00000100034.13	protein_coding	PPM1F	1	OTTHUMG00000150835.12	chr22	HAVANA	gene	21919420	21952837	-	-0.926283	0.526212	4.98224	-5.9386	1.59662e-05	0.000651988	2.85157
ENSG00000157193.15	protein_coding	LRP8	1	OTTHUMG00000008924.5	chr1	HAVANA	gene	53242364	53328070	-	-0.841728	0.557975	4.83285	-5.94417	1.57909e-05	0.000646605	2.8513
ENSG00000166825.13	protein_coding	ANPEP	2	OTTHUMG00000149814.7	chr15	HAVANA	gene	89784889	89815401	-	-0.903024	0.534765	6.64393	-6.00689	1.39482e-05	0.000585629	2.81962
ENSG00000076641.4	protein_coding	PAG1	2	OTTHUMG00000164592.3	chr8	HAVANA	gene	80967810	81112068	-	-1.75516	0.296241	2.42428	-5.74672	2.34155e-05	0.000885387	2.8188
ENSG00000108342.12	protein_coding	CSF3	2	OTTHUMG00000133247.3	chr17	HAVANA	gene	40015361	40017813	+	-4.0012	0.0624482	-1.86683	-6.09429	1.17437e-05	0.000510322	2.80701
ENSG00000062282.14	protein_coding	DGAT2	1	OTTHUMG00000165338.3	chr11	HAVANA	gene	75759512	75801535	+	1.258	2.39164	4.15397	5.83512	1.96166e-05	0.000769437	2.80316
ENSG00000058453.16	protein_coding	CROCC	2	OTTHUMG00000002200.9	chr1	HAVANA	gene	16740273	16972979	+	1.43845	2.71029	3.0937	5.75943	2.28253e-05	0.000865678	2.80053
ENSG00000125266.7	protein_coding	EFNB2	2	OTTHUMG00000017324.6	chr13	HAVANA	gene	106489731	106535662	-	-1.09226	0.469026	2.47299	-5.76656	2.25015e-05	0.000857761	2.79954
ENSG00000121236.20	protein_coding	TRIM6	1	OTTHUMG00000150029.7	chr11	HAVANA	gene	5596109	5612958	+	1.19476	2.28907	3.77445	5.78955	2.14882e-05	0.000836246	2.78446
ENSG00000183729.3	protein_coding	NPBWR1	2	OTTHUMG00000164275.1	chr8	HAVANA	gene	52938431	52941117	+	-1.56505	0.337966	2.43158	-5.73557	2.39459e-05	0.000899026	2.74933
ENSG00000110841.13	protein_coding	PPFIBP1	2	OTTHUMG00000169207.3	chr12	HAVANA	gene	27523431	27695564	+	-0.904105	0.534364	5.3619	-5.90495	1.70693e-05	0.000687617	2.72127
ENSG00000115756.12	protein_coding	HPCAL1	2	OTTHUMG00000090451.5	chr2	HAVANA	gene	10302889	10427617	+	-0.912372	0.531311	7.53539	-5.97261	1.4926e-05	0.0006197	2.71133
ENSG00000087903.12	protein_coding	RFX2	1	OTTHUMG00000180711.4	chr19	HAVANA	gene	5993164	6199572	-	-0.827703	0.563425	4.43611	-5.83986	1.94319e-05	0.000764203	2.70967
ENSG00000132938.19	protein_coding	MTUS2	2	OTTHUMG00000016657.5	chr13	HAVANA	gene	28820348	29505947	+	3.37461	10.3719	0.331926	5.85208	1.89641e-05	0.000747778	2.68955
ENSG00000181026.14	protein_coding	AEN	2	OTTHUMG00000148681.6	chr15	HAVANA	gene	88621296	88632282	+	-0.928129	0.525539	4.8829	-5.85649	1.87977e-05	0.000746996	2.68888
ENSG00000091409.14	protein_coding	ITGA6	2	OTTHUMG00000132277.5	chr2	HAVANA	gene	172427354	172506282	+	-1.74928	0.29745	3.52802	-5.76405	2.26151e-05	0.000859892	2.63911
ENSG00000078269.14	protein_coding	SYNJ2	2	OTTHUMG00000015904.5	chr6	HAVANA	gene	157981887	158099176	+	-0.617026	0.652014	6.09912	-5.89296	1.74812e-05	0.000700422	2.63487
ENSG00000197046.11	protein_coding	SIGLEC15	2	OTTHUMG00000170870.5	chr18	HAVANA	gene	45825512	45844080	+	-3.73858	0.0749162	-1.582	-5.98511	1.45615e-05	0.00060771	2.61589
ENSG00000138134.11	protein_coding	STAMBPL1	2	OTTHUMG00000018702.1	chr10	HAVANA	gene	88879734	88975153	+	-0.995099	0.501702	3.39898	-5.72764	2.43305e-05	0.00091117	2.61031
ENSG00000115738.9	protein_coding	ID2	2	OTTHUMG00000112454.3	chr2	HAVANA	gene	8678845	8684453	+	1.77351	3.41884	2.43771	5.60689	3.10443e-05	0.0011137	2.59829
ENSG00000166130.14	protein_coding	IKBIP	2	OTTHUMG00000170213.2	chr12	HAVANA	gene	98613405	98645113	-	-0.698477	0.616222	6.99864	-5.88993	1.75867e-05	0.000702761	2.58068
ENSG00000203706.8	antisense	SERTAD4-AS1	2	OTTHUMG00000036392.2	chr1	HAVANA	gene	210231456	210234047	-	-1.111	0.462974	4.22461	-5.78362	2.17451e-05	0.000839667	2.57803
ENSG00000141469.17	protein_coding	SLC14A1	1	OTTHUMG00000132617.15	chr18	HAVANA	gene	45687025	45752520	+	-1.89586	0.268713	1.27343	-5.6015	3.13854e-05	0.00112182	2.56697
ENSG00000172375.12	protein_coding	C2CD2L	1	OTTHUMG00000166167.3	chr11	HAVANA	gene	119102198	119118544	+	-1.3275	0.398459	2.98201	-5.65491	2.8171e-05	0.00102914	2.56444
ENSG00000253276.2	protein_coding	CCDC71L	2	OTTHUMG00000164150.1	chr7	HAVANA	gene	106656765	106660996	-	-0.898334	0.536506	4.8595	-5.77052	2.23233e-05	0.000853151	2.54462
ENSG00000166949.15	protein_coding	SMAD3	1	OTTHUMG00000133230.5	chr15	HAVANA	gene	67063763	67195195	+	-0.626652	0.647678	6.46539	-5.85526	1.88441e-05	0.000746996	2.53533
ENSG00000167767.13	protein_coding	KRT80	2	OTTHUMG00000150193.1	chr12	HAVANA	gene	52168996	52192000	-	-0.841025	0.558247	4.54674	-5.74235	2.36216e-05	0.00088909	2.51325
ENSG00000168264.10	protein_coding	IRF2BP2	2	OTTHUMG00000037981.1	chr1	HAVANA	gene	234604269	234609525	-	-0.872396	0.546239	5.14563	-5.78381	2.17368e-05	0.000839667	2.50158
ENSG00000099194.5	protein_coding	SCD	2	OTTHUMG00000018906.2	chr10	HAVANA	gene	100347124	100364834	+	0.555829	1.47001	7.46952	5.86404	1.85171e-05	0.000737961	2.50097
ENSG00000198919.12	protein_coding	DZIP3	2	OTTHUMG00000159232.6	chr3	HAVANA	gene	108589682	108694846	+	0.996794	1.99556	3.44585	5.6336	2.94104e-05	0.00106751	2.49661
ENSG00000233622.2	transcribed_unitary_pseudogene	CYP2T2P	1	OTTHUMG00000154549.2	chr19	HAVANA	gene	40808474	40811390	-	2.57363	5.95306	1.79153	5.55252	3.46658e-05	0.00122439	2.49626
ENSG00000178726.6	protein_coding	THBD	2	OTTHUMG00000032053.2	chr20	HAVANA	gene	23045633	23049741	-	-1.59603	0.330786	4.85331	-5.77984	2.19101e-05	0.000843852	2.49009
ENSG00000134107.4	protein_coding	BHLHE40	2	OTTHUMG00000119035.2	chr3	HAVANA	gene	4979116	4985323	+	-0.923619	0.527185	5.41332	-5.77536	2.21077e-05	0.000847082	2.47703
ENSG00000173926.5	protein_coding	2018-03-03	2	OTTHUMG00000128968.3	chr5	HAVANA	gene	126867714	127030808	-	-1.10325	0.465467	3.14887	-5.63411	2.93803e-05	0.00106751	2.46525
ENSG00000178882.14	protein_coding	FAM101A	2	OTTHUMG00000168609.5	chr12	HAVANA	gene	123973241	124316024	+	-0.832008	0.561747	6.48524	-5.8092	2.06597e-05	0.000808225	2.45435
ENSG00000100234.11	protein_coding	TIMP3	2	OTTHUMG00000030784.3	chr22	HAVANA	gene	32801701	32863043	+	-0.780824	0.582034	4.76851	-5.70027	2.57077e-05	0.000955545	2.43816
ENSG00000153823.18	protein_coding	PID1	2	OTTHUMG00000133191.5	chr2	HAVANA	gene	228850526	229271285	-	-1.53209	0.345776	2.91069	-5.59112	3.20526e-05	0.00113749	2.4362
ENSG00000181804.14	protein_coding	SLC9A9	2	OTTHUMG00000159373.3	chr3	HAVANA	gene	143265222	143848531	-	1.85293	3.61232	2.38448	5.53178	3.61587e-05	0.00126929	2.43237
ENSG00000102471.13	protein_coding	NDFIP2	1	OTTHUMG00000017136.7	chr13	HAVANA	gene	79481124	79556075	+	-1.03647	0.487517	4.72519	-5.71375	2.50195e-05	0.000932289	2.41857
ENSG00000233532.6	lincRNA	RP11-165M6.1	2	OTTHUMG00000017319.2	chr13	HAVANA	gene	106374477	106384315	+	-1.0666	0.477442	3.08229	-5.61136	3.07649e-05	0.00110761	2.41461
ENSG00000197448.13	protein_coding	GSTK1	2	OTTHUMG00000152637.7	chr7	HAVANA	gene	143244093	143270854	+	0.651641	1.57095	6.66557	5.78778	2.15643e-05	0.000837022	2.41185
ENSG00000019186.9	protein_coding	CYP24A1	1	OTTHUMG00000032773.2	chr20	HAVANA	gene	54153449	54173973	-	-2.18056	0.22059	0.890019	-5.51014	3.77884e-05	0.00130985	2.4092
ENSG00000124098.9	protein_coding	FAM210B	2	OTTHUMG00000032793.2	chr20	HAVANA	gene	56358915	56368663	+	0.796204	1.73653	5.42862	5.72324	2.45467e-05	0.000916965	2.39783
ENSG00000136783.9	protein_coding	NIPSNAP3A	2	OTTHUMG00000020413.1	chr9	HAVANA	gene	104747688	104760122	+	0.966011	1.95343	5.80075	5.74569	2.34638e-05	0.000885387	2.39353
ENSG00000136205.16	protein_coding	TNS3	1	OTTHUMG00000074075.3	chr7	HAVANA	gene	47275154	47582558	-	1.06782	2.09626	6.42372	5.77578	2.20894e-05	0.000847082	2.39259
ENSG00000227471.8	protein_coding	AKR1B15	2	OTTHUMG00000155376.2	chr7	HAVANA	gene	134549136	134579875	+	1.04494	2.06328	3.85241	5.62973	2.96417e-05	0.00107235	2.37099
ENSG00000177169.9	protein_coding	ULK1	2	OTTHUMG00000168052.5	chr12	HAVANA	gene	131894651	131923167	+	1.06426	2.0911	4.94643	5.66821	2.74242e-05	0.00101136	2.36715
ENSG00000137491.14	protein_coding	SLCO2B1	1	OTTHUMG00000165420.4	chr11	HAVANA	gene	75100563	75206549	+	1.76307	3.39419	2.8142	5.48985	3.93848e-05	0.0013526	2.32171
ENSG00000127528.5	protein_coding	KLF2	2	OTTHUMG00000182330.1	chr19	HAVANA	gene	16324817	16327874	+	1.3868	2.61498	4.50965	5.53409	3.59894e-05	0.00126814	2.30201
ENSG00000119280.16	protein_coding	C1orf198	1	OTTHUMG00000037790.3	chr1	HAVANA	gene	230837119	230869589	-	1.07138	2.10144	4.94958	5.60627	3.10834e-05	0.0011137	2.25822
ENSG00000159733.13	protein_coding	ZFYVE28	1	OTTHUMG00000160292.5	chr4	HAVANA	gene	2269582	2418663	-	-1.43936	0.368731	2.52965	-5.49138	3.92614e-05	0.00135148	2.24654
ENSG00000127603.25	protein_coding	MACF1	1	OTTHUMG00000007754.14	chr1	HAVANA	gene	39081316	39487177	+	-0.724033	0.605403	5.91393	-5.68799	2.63518e-05	0.000974626	2.23257
ENSG00000006210.6	protein_coding	CX3CL1	1	OTTHUMG00000133469.5	chr16	HAVANA	gene	57372458	57385048	+	3.81179	14.0431	1.72466	5.45517	4.22749e-05	0.0014386	2.22544
ENSG00000186577.12	protein_coding	C6orf1	2	OTTHUMG00000159754.3	chr6	HAVANA	gene	34246380	34249470	-	-0.988899	0.503862	4.71353	-5.61937	3.02696e-05	0.00109242	2.21435
ENSG00000173432.10	protein_coding	SAA1	2	OTTHUMG00000166147.3	chr11	HAVANA	gene	18266174	18269977	+	-0.876909	0.544533	4.13097	-5.59949	3.15135e-05	0.0011237	2.19625
ENSG00000041982.15	protein_coding	TNC	1	OTTHUMG00000021010.6	chr9	HAVANA	gene	115019578	115118257	-	-1.00571	0.498023	5.28239	-5.66389	2.76648e-05	0.00101563	2.17767
ENSG00000169032.9	protein_coding	MAP2K1	1	OTTHUMG00000133196.5	chr15	HAVANA	gene	66386817	66492312	+	-0.614708	0.653062	7.28087	-5.69183	2.61485e-05	0.000969512	2.155
ENSG00000065618.18	protein_coding	COL17A1	2	OTTHUMG00000018998.2	chr10	HAVANA	gene	104031286	104086002	-	-3.73858	0.0749162	-1.13418	-5.66719	2.74808e-05	0.00101136	2.13999
ENSG00000197415.11	protein_coding	VEPH1	1	OTTHUMG00000158711.5	chr3	HAVANA	gene	157259742	157533619	-	-2.71193	0.152626	-0.712906	-5.40397	4.69481e-05	0.00156197	2.12207
ENSG00000171552.12	protein_coding	BCL2L1	2	OTTHUMG00000032192.3	chr20	HAVANA	gene	31664452	31723989	-	-1.27302	0.413793	6.84301	-5.63317	2.94362e-05	0.00106751	2.08684
ENSG00000169231.13	protein_coding	THBS3	2	OTTHUMG00000035710.4	chr1	HAVANA	gene	155195588	155209051	-	1.07522	2.10704	4.50897	5.49508	3.89663e-05	0.00134695	2.08596
ENSG00000174640.12	protein_coding	SLCO2A1	1	OTTHUMG00000159745.3	chr3	HAVANA	gene	133932696	134052184	-	-2.26165	0.208534	0.603018	-5.33808	5.37539e-05	0.00176476	2.08392
ENSG00000171033.12	protein_coding	PKIA	2	OTTHUMG00000164618.1	chr8	HAVANA	gene	78516139	78605267	+	-1.48862	0.356352	4.05317	-5.51226	3.76254e-05	0.00130985	2.07237
ENSG00000115363.13	protein_coding	EVA1A	1	OTTHUMG00000129991.3	chr2	HAVANA	gene	75469302	75569722	-	-2.90455	0.13355	-0.165433	-5.39201	4.8114e-05	0.00159719	2.05989
ENSG00000163171.7	protein_coding	CDC42EP3	2	OTTHUMG00000100971.5	chr2	HAVANA	gene	37641882	37738468	-	-0.760579	0.59026	5.66388	-5.59502	3.18e-05	0.00113122	2.05869
ENSG00000178896.8	protein_coding	EXOSC4	1	OTTHUMG00000165437.2	chr8	HAVANA	gene	144078626	144080647	+	-0.852751	0.553728	5.74072	-5.58898	3.21923e-05	0.00113973	2.05316
ENSG00000111843.13	protein_coding	TMEM14C	2	OTTHUMG00000014242.1	chr6	HAVANA	gene	10722915	10731129	+	0.634072	1.55194	8.9204	5.66045	2.78576e-05	0.00102019	2.04111
ENSG00000028137.18	protein_coding	TNFRSF1B	2	OTTHUMG00000001829.1	chr1	HAVANA	gene	12167003	12209228	+	-1.03401	0.48835	4.01631	-5.49416	3.90393e-05	0.00134695	2.02984
ENSG00000185745.9	protein_coding	IFIT1	2	OTTHUMG00000018712.1	chr10	HAVANA	gene	89392546	89406486	+	1.66631	3.17401	3.48532	5.4102	4.63526e-05	0.0015456	1.98389
ENSG00000010030.13	protein_coding	ETV7	2	OTTHUMG00000014594.2	chr6	HAVANA	gene	36354091	36387800	-	1.99842	3.99563	1.82787	5.27768	6.08843e-05	0.00196424	1.96642
ENSG00000273055.1	antisense	CTB-13F3.1	2	OTTHUMG00000186301.1	chr7	HAVANA	gene	107942116	107942740	+	-2.16711	0.222656	1.51613	-5.26976	6.18887e-05	0.00198804	1.95196
ENSG00000105204.13	protein_coding	DYRK1B	2	OTTHUMG00000182584.5	chr19	HAVANA	gene	39825350	39834201	-	2.07807	4.22243	2.20214	5.26402	6.26273e-05	0.00199884	1.93678
ENSG00000162840.4	processed_pseudogene	RP11-4I17.1	2	OTTHUMG00000160744.1	chr4	HAVANA	gene	68376323	68376505	+	-2.70732	0.153114	0.611624	-5.26451	6.25644e-05	0.00199884	1.90893
ENSG00000168685.14	protein_coding	IL7R	1	OTTHUMG00000090791.5	chr5	HAVANA	gene	35852695	35879603	+	-1.18741	0.43909	3.49944	-5.37655	4.96654e-05	0.00163775	1.90455
ENSG00000170545.16	protein_coding	SMAGP	2	OTTHUMG00000185196.2	chr12	HAVANA	gene	51244558	51270890	-	-0.917413	0.529458	4.4415	-5.4399	4.36165e-05	0.00147751	1.89193
ENSG00000151789.10	protein_coding	ZNF385D	1	OTTHUMG00000130484.9	chr3	HAVANA	gene	21412222	22373321	-	-1.2351	0.424812	1.62423	-5.27528	6.11874e-05	0.00196976	1.89084
ENSG00000168542.14	protein_coding	COL3A1	2	OTTHUMG00000132648.6	chr2	HAVANA	gene	188974320	189012746	+	0.721877	1.64933	6.77866	5.52599	3.65879e-05	0.00128015	1.88703
ENSG00000231574.5	lincRNA	RP11-91K9.1	2	OTTHUMG00000157236.1	chr3	HAVANA	gene	177816865	177899224	+	-3.47658	0.0898351	-2.52926	-5.44832	4.28715e-05	0.00145558	1.88494
ENSG00000138131.3	protein_coding	LOXL4	2	OTTHUMG00000018874.1	chr10	HAVANA	gene	98247690	98268250	-	3.96422	15.608	1.29422	5.41185	4.61955e-05	0.00154382	1.87923
ENSG00000077782.19	protein_coding	FGFR1	1	OTTHUMG00000147366.12	chr8	HAVANA	gene	38411138	38468834	-	-0.693179	0.61849	6.13278	-5.51862	3.71409e-05	0.00129645	1.87411
ENSG00000165757.8	protein_coding	KIAA1462	2	OTTHUMG00000017885.1	chr10	HAVANA	gene	30012800	30115494	-	-1.2032	0.43431	3.14656	-5.33051	5.45985e-05	0.0017861	1.86926
ENSG00000145990.10	protein_coding	GFOD1	2	OTTHUMG00000014276.2	chr6	HAVANA	gene	13357830	13487662	-	-0.894888	0.537789	5.0069	-5.46838	4.11495e-05	0.00140418	1.86728
ENSG00000196449.3	protein_coding	YRDC	2	OTTHUMG00000004318.1	chr1	HAVANA	gene	37802944	37808185	-	-0.608792	0.655746	6.01972	-5.51119	3.77074e-05	0.00130985	1.86384
ENSG00000183196.8	protein_coding	CHST6	2	OTTHUMG00000137612.3	chr16	HAVANA	gene	75472052	75495384	-	-1.30951	0.403457	2.64402	-5.29174	5.91416e-05	0.00191632	1.84799
ENSG00000170899.10	protein_coding	GSTA4	2	OTTHUMG00000014868.3	chr6	HAVANA	gene	52977948	52995378	-	0.935306	1.9123	4.65582	5.41713	4.56985e-05	0.00153064	1.84711
ENSG00000112511.17	protein_coding	PHF1	2	OTTHUMG00000031105.11	chr6	HAVANA	gene	33410399	33416453	+	-1.20093	0.434994	2.47737	-5.26524	6.247e-05	0.00199884	1.83703
ENSG00000272398.5	protein_coding	CD24	2	OTTHUMG00000188439.1	chr6	HAVANA	gene	106969831	106975627	-	2.75594	6.75494	2.71338	5.19504	7.22467e-05	0.00223875	1.79988
ENSG00000044574.7	protein_coding	HSPA5	2	OTTHUMG00000020672.1	chr9	HAVANA	gene	125234853	125241330	-	-0.683714	0.622561	8.38018	-5.53133	3.61925e-05	0.00126929	1.77707
ENSG00000164442.9	protein_coding	CITED2	2	OTTHUMG00000015691.2	chr6	HAVANA	gene	139371807	139374620	-	0.962179	1.94825	4.89798	5.384	4.89121e-05	0.00162008	1.75534
ENSG00000117525.13	protein_coding	F3	2	OTTHUMG00000010716.3	chr1	HAVANA	gene	94529225	94541800	-	-1.33608	0.396094	3.0545	-5.25752	6.34753e-05	0.00200629	1.74753
ENSG00000130202.9	protein_coding	NECTIN2	1	OTTHUMG00000180839.2	chr19	HAVANA	gene	44846175	44889228	+	-0.93672	0.522419	6.46142	-5.46814	4.11693e-05	0.00140418	1.73674
ENSG00000124882.3	protein_coding	EREG	2	OTTHUMG00000130005.2	chr4	HAVANA	gene	74365143	74388751	+	-1.39008	0.381543	3.756	-5.32139	5.5634e-05	0.0018145	1.72921
ENSG00000169607.12	protein_coding	CKAP2L	2	OTTHUMG00000131313.2	chr2	HAVANA	gene	112736607	112764677	-	-0.820374	0.566295	5.5879	-5.43424	4.41247e-05	0.00148796	1.72648
ENSG00000175556.16	protein_coding	LONRF3	2	OTTHUMG00000022262.6	chrX	HAVANA	gene	118974614	119018355	+	-1.12777	0.457623	2.47602	-5.21805	6.88794e-05	0.0021523	1.70592
ENSG00000092841.18	protein_coding	MYL6	2	OTTHUMG00000170200.7	chr12	HAVANA	gene	56158161	56163496	+	0.62744	1.54482	9.20541	5.48595	3.96991e-05	0.00136026	1.67106
ENSG00000109220.10	protein_coding	CHIC2	2	OTTHUMG00000102101.2	chr4	HAVANA	gene	54009789	54064690	-	-1.02124	0.492694	3.5396	-5.25704	6.35381e-05	0.00200629	1.65251
ENSG00000151746.13	protein_coding	BICD1	1	OTTHUMG00000169307.5	chr12	HAVANA	gene	32106835	32383633	+	-0.91212	0.531404	3.46624	-5.25498	6.38094e-05	0.00200649	1.64044
ENSG00000189241.6	protein_coding	TSPYL1	2	OTTHUMG00000015427.1	chr6	HAVANA	gene	116276578	116279903	-	0.689992	1.61327	5.97644	5.38181	4.91318e-05	0.00162374	1.62955
ENSG00000198900.5	protein_coding	TOP1	2	OTTHUMG00000033057.2	chr20	HAVANA	gene	41028818	41124487	+	-0.813793	0.568884	7.32039	-5.43733	4.38466e-05	0.00148193	1.62137
ENSG00000160606.10	protein_coding	TLCD1	2	OTTHUMG00000132683.4	chr17	HAVANA	gene	28724348	28727935	-	1.12986	2.18838	3.96732	5.25605	6.36683e-05	0.00200629	1.62137
ENSG00000153391.15	protein_coding	INO80C	1	OTTHUMG00000132564.6	chr18	HAVANA	gene	35452230	35497991	-	-0.75701	0.591722	4.30979	-5.29582	5.86457e-05	0.00190439	1.61212
ENSG00000178860.8	protein_coding	MSC	2	OTTHUMG00000164489.1	chr8	HAVANA	gene	71841549	71844468	-	0.745282	1.6763	7.16868	5.42204	4.5241e-05	0.00151873	1.60618
ENSG00000162909.17	protein_coding	CAPN2	2	OTTHUMG00000037376.4	chr1	HAVANA	gene	223701593	223776018	+	-0.835384	0.560434	7.36568	-5.42732	4.47547e-05	0.0015058	1.60563
ENSG00000258711.2	lincRNA	RP11-218E20.3	2	OTTHUMG00000171001.2	chr14	HAVANA	gene	50956259	50962002	-	2.15698	4.45981	2.33404	5.09505	8.89549e-05	0.00267895	1.60467
ENSG00000137869.14	protein_coding	CYP19A1	1	OTTHUMG00000131747.6	chr15	HAVANA	gene	51208057	51338610	-	-1.55868	0.339462	1.19296	-5.11263	8.57534e-05	0.00260848	1.59781
ENSG00000177989.13	protein_coding	ODF3B	1	OTTHUMG00000150334.3	chr22	HAVANA	gene	50529710	50532580	-	1.57729	2.9841	2.11386	5.08402	9.10257e-05	0.00272986	1.5697
ENSG00000253669.3	lincRNA	KB-1732A1.1	1	OTTHUMG00000164736.2	chr8	HAVANA	gene	102805517	102809971	+	-2.35779	0.19509	1.31225	-5.07228	9.32853e-05	0.002792	1.56828
ENSG00000164236.11	protein_coding	ANKRD33B	1	OTTHUMG00000162050.5	chr5	HAVANA	gene	10564330	10657816	+	0.921723	1.89438	4.68314	5.26251	6.28228e-05	0.0020008	1.56434
ENSG00000163545.8	protein_coding	NUAK2	2	OTTHUMG00000037196.2	chr1	HAVANA	gene	205302059	205321791	-	-1.89575	0.268734	0.898162	-5.05474	9.67685e-05	0.00288169	1.52923
ENSG00000152061.23	protein_coding	RABGAP1L	2	OTTHUMG00000034899.9	chr1	HAVANA	gene	174159410	174995308	+	0.97389	1.96413	4.59426	5.26037	6.3102e-05	0.00200541	1.52795
ENSG00000099937.10	protein_coding	SERPIND1	2	OTTHUMG00000150755.1	chr22	HAVANA	gene	20773879	20787720	+	-4.5815	0.0417669	-0.941064	-5.22278	6.82081e-05	0.0021403	1.52418
ENSG00000173530.5	protein_coding	TNFRSF10D	2	OTTHUMG00000097845.1	chr8	HAVANA	gene	23135588	23164030	-	-1.27963	0.411901	2.9852	-5.13658	8.15797e-05	0.00250195	1.52257
ENSG00000185215.8	protein_coding	TNFAIP2	2	OTTHUMG00000171890.2	chr14	HAVANA	gene	103123442	103137439	+	0.881098	1.84178	6.70124	5.36141	5.12349e-05	0.00168578	1.50644
ENSG00000273489.1	antisense	RP11-180C16.1	2	OTTHUMG00000186336.1	chr7	HAVANA	gene	131493964	131497694	-	-3.5156	0.0874377	-2.35368	-5.30279	5.78085e-05	0.0018813	1.48887
ENSG00000171604.11	protein_coding	CXXC5	2	OTTHUMG00000163331.4	chr5	HAVANA	gene	139647299	139683882	+	0.896689	1.86179	5.59651	5.27982	6.06154e-05	0.00195981	1.45159
ENSG00000067182.7	protein_coding	TNFRSF1A	1	OTTHUMG00000168267.3	chr12	HAVANA	gene	6328757	6342114	-	-0.725603	0.604744	6.83082	-5.33011	5.46434e-05	0.0017861	1.4187
ENSG00000163568.14	protein_coding	AIM2	2	OTTHUMG00000037183.4	chr1	HAVANA	gene	159062484	159147096	-	-1.51703	0.349404	0.343703	-5.01416	0.000105346	0.00308483	1.41332
ENSG00000145675.14	protein_coding	PIK3R1	1	OTTHUMG00000131251.3	chr5	HAVANA	gene	68215720	68301821	+	1.08016	2.11427	3.45621	5.10124	8.78131e-05	0.00265488	1.39855
ENSG00000271605.5	protein_coding	MILR1	2	OTTHUMG00000185198.4	chr17	HAVANA	gene	64449037	64468643	+	-1.65475	0.317592	0.74327	-4.98883	0.00011109	0.00319653	1.39807
ENSG00000173846.12	protein_coding	PLK3	2	OTTHUMG00000008491.2	chr1	HAVANA	gene	44800225	44805990	+	-2.23489	0.212438	1.64247	-4.99972	0.000108583	0.00313042	1.39727
ENSG00000166510.13	protein_coding	CCDC68	2	OTTHUMG00000132708.3	chr18	HAVANA	gene	54901509	54959508	-	-1.55757	0.339722	1.19242	-4.98684	0.000111555	0.00320372	1.39322
ENSG00000265972.5	protein_coding	TXNIP	2	OTTHUMG00000013755.6	chr1	HAVANA	gene	145992435	145996600	-	1.54356	2.91513	5.72331	5.2211	6.84454e-05	0.00214323	1.37289
ENSG00000184584.12	protein_coding	TMEM173	1	OTTHUMG00000129239.8	chr5	HAVANA	gene	139475534	139482935	-	-0.973509	0.509266	3.39377	-5.10516	8.70999e-05	0.00263867	1.35707
ENSG00000229563.6	lincRNA	RP11-245M24.1	2	OTTHUMG00000021406.2	chrX	HAVANA	gene	45505388	45630202	+	-2.65121	0.159186	-0.566055	-5.00192	0.000108083	0.00312812	1.35082
ENSG00000134769.21	protein_coding	DTNA	1	OTTHUMG00000132309.6	chr18	HAVANA	gene	34493290	34891844	+	0.903118	1.8701	4.25971	5.15048	7.92544e-05	0.00244068	1.34446
ENSG00000022267.16	protein_coding	FHL1	2	OTTHUMG00000022504.7	chrX	HAVANA	gene	136146702	136211359	+	-0.738749	0.599259	6.01283	-5.25724	6.35112e-05	0.00200629	1.34291
ENSG00000071242.11	protein_coding	RPS6KA2	1	OTTHUMG00000016007.9	chr6	HAVANA	gene	166409364	166906451	-	-1.16436	0.446161	1.70564	-5.03388	0.000101083	0.00298938	1.31932
ENSG00000241749.4	transcribed_processed_pseudogene	RP11-764E9.1	1	OTTHUMG00000157608.3	chr12	HAVANA	gene	65758020	65826997	-	-2.49827	0.176988	0.424622	-4.94458	0.000121909	0.00343488	1.31691
ENSG00000159167.11	protein_coding	STC1	1	OTTHUMG00000097853.2	chr8	HAVANA	gene	23841915	23854807	-	-1.60915	0.327792	2.30449	-5.00272	0.000107903	0.00312812	1.31306
ENSG00000146666.5	antisense	AC019066.3	2	OTTHUMG00000155644.1	chr7	HAVANA	gene	47761476	47766772	+	1.79024	3.45872	1.56387	4.94827	0.000120967	0.00342128	1.29923
ENSG00000198865.9	protein_coding	CCDC152	2	OTTHUMG00000162141.1	chr5	HAVANA	gene	42756801	42802360	+	-1.06749	0.477149	2.93937	-5.03202	0.000101479	0.0029949	1.29677
ENSG00000127947.15	protein_coding	PTPN12	1	OTTHUMG00000023501.9	chr7	HAVANA	gene	77537275	77640071	+	-1.76358	0.294517	3.00364	-5.02332	0.000103345	0.00303219	1.28831
ENSG00000119714.10	protein_coding	GPR68	2	OTTHUMG00000167590.4	chr14	HAVANA	gene	91232532	91253925	-	-1.45755	0.364112	1.7024	-4.98249	0.000112579	0.00322071	1.27873
ENSG00000197635.9	protein_coding	DPP4	2	OTTHUMG00000132056.13	chr2	HAVANA	gene	161992241	162074542	-	0.880813	1.84141	5.43751	5.19667	7.20022e-05	0.00223582	1.27107
ENSG00000141441.15	protein_coding	GAREM1	1	OTTHUMG00000132273.4	chr18	HAVANA	gene	32124877	32470484	-	0.934085	1.91068	4.29542	5.11041	8.61503e-05	0.00261521	1.26461
ENSG00000078401.6	protein_coding	EDN1	2	OTTHUMG00000014266.1	chr6	HAVANA	gene	12290363	12297194	+	-2.03375	0.244219	2.26046	-4.91381	0.000130061	0.00360999	1.26078
ENSG00000112297.14	protein_coding	AIM1	2	OTTHUMG00000015302.3	chr6	HAVANA	gene	106360808	106571978	+	0.662792	1.58314	5.64539	5.19787	7.18231e-05	0.00223491	1.25755
ENSG00000155093.17	protein_coding	PTPRN2	2	OTTHUMG00000152646.2	chr7	HAVANA	gene	157539056	158587788	-	-1.44335	0.367712	1.6302	-5.00803	0.000106707	0.00311247	1.25474
ENSG00000133101.9	protein_coding	CCNA1	2	OTTHUMG00000016733.3	chr13	HAVANA	gene	36431520	36442882	+	-0.961376	0.513567	2.29069	-5.05428	9.68621e-05	0.00288169	1.25463
ENSG00000170525.20	protein_coding	PFKFB3	2	OTTHUMG00000017621.5	chr10	HAVANA	gene	6144934	6254644	+	-0.796564	0.575719	5.46054	-5.19246	7.2634e-05	0.00224608	1.24553
ENSG00000265724.1	miRNA	MIR4284	3	NA	chr7	ENSEMBL	gene	73711317	73711397	+	-3.42598	0.0930416	-1.98552	-5.11345	8.56075e-05	0.00260848	1.18196
ENSG00000069974.15	protein_coding	RAB27A	2	OTTHUMG00000131959.3	chr15	HAVANA	gene	55202966	55319113	-	-0.680372	0.624004	5.40764	-5.16289	7.7235e-05	0.00238341	1.16504
ENSG00000101335.9	protein_coding	MYL9	2	OTTHUMG00000032387.3	chr20	HAVANA	gene	36541484	36551447	+	1.89082	3.70846	3.70346	4.92277	0.00012763	0.00354912	1.16428
ENSG00000145819.16	protein_coding	ARHGAP26	1	OTTHUMG00000059705.14	chr5	HAVANA	gene	142770377	143229011	+	-0.98705	0.504508	3.22179	-5.01146	0.000105944	0.00309626	1.15896
ENSG00000116741.7	protein_coding	RGS2	2	OTTHUMG00000035600.2	chr1	HAVANA	gene	192809039	192812283	+	-1.26145	0.417124	3.13692	-4.9838	0.00011227	0.00321803	1.14701
ENSG00000151388.10	protein_coding	ADAMTS12	2	OTTHUMG00000162088.4	chr5	HAVANA	gene	33523535	33892192	-	-1.28925	0.409163	2.95908	-4.96388	0.000117064	0.00332351	1.14603
ENSG00000082074.16	protein_coding	FYB1	2	OTTHUMG00000162071.8	chr5	HAVANA	gene	39105255	39274528	-	2.64368	6.24923	1.25776	4.85635	0.00014681	0.00397856	1.13615
ENSG00000163395.16	protein_coding	IGFN1	2	OTTHUMG00000035728.5	chr1	HAVANA	gene	201190825	201228952	+	1.36771	2.58061	5.22136	5.05574	9.65655e-05	0.00288169	1.13275
ENSG00000181649.6	protein_coding	PHLDA2	2	OTTHUMG00000010926.2	chr11	HAVANA	gene	2928273	2929455	-	-1.03566	0.487794	7.45514	-5.19804	7.17977e-05	0.00223491	1.11715
ENSG00000120833.13	protein_coding	SOCS2	1	OTTHUMG00000170160.5	chr12	HAVANA	gene	93569814	93583487	+	2.19942	4.59295	2.30162	4.83896	0.000152305	0.00411251	1.10898
ENSG00000102871.15	protein_coding	TRADD	2	OTTHUMG00000137519.3	chr16	HAVANA	gene	67154180	67160298	-	0.755018	1.68765	5.5101	5.09401	8.91485e-05	0.00267895	1.0662
ENSG00000049192.14	protein_coding	ADAMTS6	2	OTTHUMG00000074079.7	chr5	HAVANA	gene	65148736	65481920	-	-1.00405	0.498597	3.31908	-4.94011	0.00012306	0.00345478	1.05225
ENSG00000231185.6	antisense	AC005592.2	2	OTTHUMG00000133693.3	chr5	HAVANA	gene	142325293	142672001	+	-3.24617	0.105392	-1.974	-5.00211	0.00010804	0.00312812	1.04315
ENSG00000107957.16	protein_coding	SH3PXD2A	2	OTTHUMG00000018997.2	chr10	HAVANA	gene	103594027	103855543	-	-1.97933	0.253607	1.79217	-4.82168	0.000157968	0.00422127	1.03629
ENSG00000101457.12	protein_coding	DNTTIP1	1	OTTHUMG00000032610.2	chr20	HAVANA	gene	45791937	45811427	+	0.542286	1.45628	7.00459	5.14838	7.96013e-05	0.00244631	1.03618
ENSG00000064547.13	protein_coding	LPAR2	2	OTTHUMG00000182328.2	chr19	HAVANA	gene	19623668	19628930	-	2.36835	5.16349	0.506161	4.86441	0.000144335	0.00392576	1.03172
ENSG00000171223.5	protein_coding	JUNB	2	OTTHUMG00000180373.1	chr19	HAVANA	gene	12791496	12793315	+	0.729443	1.658	6.37727	5.11968	8.45026e-05	0.00258626	1.02022
ENSG00000270605.1	antisense	RP5-1092A3.4	2	OTTHUMG00000185161.1	chr1	HAVANA	gene	28239509	28241453	-	1.41304	2.66298	2.12255	4.81855	0.00015902	0.00422702	1.01879
ENSG00000151287.16	protein_coding	TEX30	2	OTTHUMG00000017306.5	chr13	HAVANA	gene	102765990	102773811	-	-0.614886	0.652981	6.07789	-5.11795	8.4808e-05	0.00259029	1.01779
ENSG00000185989.10	protein_coding	RASA3	2	OTTHUMG00000017399.3	chr13	HAVANA	gene	113977783	114132611	-	-1.11031	0.463193	3.95961	-4.97273	0.000114908	0.00327477	1.01629
ENSG00000131016.16	protein_coding	AKAP12	2	OTTHUMG00000015833.1	chr6	HAVANA	gene	151239999	151358557	+	-0.786452	0.579768	5.8982	-5.09476	8.90097e-05	0.00267895	1.0079
ENSG00000169398.19	protein_coding	PTK2	1	OTTHUMG00000067438.25	chr8	HAVANA	gene	140657900	141002216	-	-0.780595	0.582127	5.02182	-5.05059	9.76112e-05	0.0028982	0.99433
ENSG00000109321.10	protein_coding	AREG	2	OTTHUMG00000130006.2	chr4	HAVANA	gene	74445134	74455009	+	-3.84961	0.0693669	-0.752288	-4.93459	0.000124497	0.00348149	0.985266
ENSG00000281376.1	antisense	ABALON	2	OTTHUMG00000189574.1	chr20	HAVANA	gene	31721507	31723409	+	-1.21288	0.431407	2.78585	-4.86535	0.000144049	0.00392513	0.97939
ENSG00000041353.9	protein_coding	RAB27B	1	OTTHUMG00000132710.6	chr18	HAVANA	gene	54717860	54895516	+	-1.60299	0.329195	0.842601	-4.78796	0.000169654	0.00440983	0.959027
ENSG00000264920.1	processed_transcript	RP11-6N17.4	2	OTTHUMG00000178293.1	chr17	HAVANA	gene	47891255	47895812	-	0.839651	1.78962	4.56388	4.96217	0.000117485	0.00332911	0.957339
ENSG00000176371.13	protein_coding	ZSCAN2	1	OTTHUMG00000074027.5	chr15	HAVANA	gene	84600986	84627796	+	1.0658	2.09334	3.70745	4.92326	0.000127501	0.00354912	0.942203
ENSG00000176046.8	protein_coding	NUPR1	1	OTTHUMG00000131764.3	chr16	HAVANA	gene	28532708	28539174	-	2.17304	4.50973	3.09478	4.74465	0.000185965	0.00476256	0.915796
ENSG00000170345.9	protein_coding	FOS	1	OTTHUMG00000171774.3	chr14	HAVANA	gene	75278774	75282230	+	-2.28316	0.205447	0.555068	-4.73769	0.000188733	0.00482516	0.908017
ENSG00000270069.1	lincRNA	RP6-99M1.2	2	OTTHUMG00000184015.3	chrX	HAVANA	gene	45745211	45770274	-	-3.69115	0.0774199	-0.866091	-4.78974	0.000169016	0.00440417	0.900087
ENSG00000131873.6	protein_coding	CHSY1	1	OTTHUMG00000149873.3	chr15	HAVANA	gene	101175723	101251932	-	-0.802358	0.573411	5.14366	-5.00688	0.000106965	0.0031139	0.860222
ENSG00000196754.10	protein_coding	S100A2	1	OTTHUMG00000035031.3	chr1	HAVANA	gene	153561108	153567890	-	0.650444	1.56965	6.19418	5.03111	0.000101672	0.0029949	0.852923
ENSG00000134339.8	protein_coding	SAA2	1	OTTHUMG00000166484.1	chr11	HAVANA	gene	18239223	18248643	-	-1.63162	0.322725	1.0398	-4.73073	0.000191542	0.00487004	0.8345
ENSG00000158246.7	protein_coding	FAM46B	2	OTTHUMG00000004278.3	chr1	HAVANA	gene	27005020	27012836	-	3.45073	10.9338	0.728101	4.79887	0.00016578	0.00432741	0.831731
ENSG00000248323.5	lincRNA	RP11-213H15.3	2	OTTHUMG00000162611.1	chr5	HAVANA	gene	91303029	91314402	-	-1.01974	0.493206	3.41469	-4.87455	0.000141279	0.00387089	0.818558
ENSG00000164237.8	protein_coding	CMBL	2	OTTHUMG00000131043.2	chr5	HAVANA	gene	10275875	10308026	-	0.532181	1.44611	7.44729	5.03828	0.000100159	0.00296793	0.801475
ENSG00000254703.2	antisense	RP11-744N12.2	2	OTTHUMG00000165793.2	chr11	HAVANA	gene	128691672	128696023	-	-1.27395	0.413527	2.56879	-4.76173	0.000179351	0.00462495	0.790138
ENSG00000240194.7	transcribed_unitary_pseudogene	CYMP	1	OTTHUMG00000022784.4	chr1	HAVANA	gene	110480752	110491277	+	1.32558	2.50633	1.09756	4.68071	0.000213026	0.00531389	0.772474
ENSG00000052802.12	protein_coding	MSMO1	2	OTTHUMG00000161126.6	chr4	HAVANA	gene	165327623	165343160	+	0.767538	1.70236	5.72286	4.96651	0.000116419	0.00331149	0.750904
ENSG00000162783.10	protein_coding	IER5	2	OTTHUMG00000035178.2	chr1	HAVANA	gene	181088712	181092899	+	-0.640083	0.641676	5.88309	-4.9787	0.000113478	0.00324022	0.747624
ENSG00000143256.4	protein_coding	PFDN2	2	OTTHUMG00000031481.1	chr1	HAVANA	gene	161100556	161118111	-	-0.589928	0.664376	7.93829	-5.02948	0.000102019	0.00299921	0.741117
ENSG00000111087.9	protein_coding	GLI1	2	OTTHUMG00000167332.2	chr12	HAVANA	gene	57460135	57472262	+	1.94027	3.83777	1.82804	4.64672	0.000229012	0.00555028	0.725862
ENSG00000185432.11	protein_coding	METTL7A	2	OTTHUMG00000169484.3	chr12	HAVANA	gene	50923472	50932517	+	0.951294	1.93361	3.60921	4.81145	0.000161426	0.00427362	0.722586
ENSG00000248690.6	antisense	HAS2AS	2	OTTHUMG00000164965.2	chr8	HAVANA	gene	121639293	121644693	+	-1.88598	0.270561	-0.2455	-4.63627	0.000234169	0.0056295	0.714789
ENSG00000165733.7	protein_coding	BMS1	2	OTTHUMG00000018020.2	chr10	HAVANA	gene	42782801	42834937	+	-0.630897	0.645775	5.32878	-4.92819	0.000126184	0.00352206	0.707458
ENSG00000174718.11	protein_coding	KIAA1551	2	OTTHUMG00000128501.5	chr12	HAVANA	gene	31959370	31993107	+	-1.49955	0.353663	1.07448	-4.64766	0.000228554	0.00555028	0.70735
ENSG00000159216.18	protein_coding	RUNX1	1	OTTHUMG00000086299.10	chr21	HAVANA	gene	34787801	36004667	-	-0.759993	0.590499	3.9596	-4.84628	0.000149966	0.00405669	0.70483
ENSG00000162595.6	protein_coding	DIRAS3	2	OTTHUMG00000009544.3	chr1	HAVANA	gene	68045896	68051631	-	-1.33545	0.396268	1.36358	-4.65099	0.000226938	0.00553602	0.702442
ENSG00000276900.1	antisense	RP11-467L13.7	2	OTTHUMG00000187205.1	chr12	HAVANA	gene	31729117	31731204	+	-1.60561	0.328597	1.38825	-4.66313	0.000221148	0.00543181	0.701974
ENSG00000247774.6	processed_transcript	RP11-493L12.2	2	OTTHUMG00000169619.1	chr12	HAVANA	gene	47205898	47216456	-	-1.59994	0.32989	0.992429	-4.64145	0.000231598	0.00558571	0.700986
ENSG00000119718.10	protein_coding	EIF2B2	1	OTTHUMG00000171764.3	chr14	HAVANA	gene	75002911	75012366	+	-0.598573	0.660407	5.78362	-4.94572	0.000121617	0.00343315	0.699885
ENSG00000187908.17	protein_coding	DMBT1	2	OTTHUMG00000019185.3	chr10	HAVANA	gene	122560665	122643736	+	-3.15772	0.112055	-0.126716	-4.71345	0.0001987	0.00501121	0.697622
ENSG00000249740.2	lincRNA	CTD-2127H9.1	1	OTTHUMG00000162040.2	chr5	HAVANA	gene	38710367	38845829	-	-1.70065	0.307648	1.39207	-4.64783	0.000228474	0.00555028	0.695411
ENSG00000108797.11	protein_coding	CNTNAP1	2	OTTHUMG00000180643.1	chr17	HAVANA	gene	42682613	42699814	+	1.33618	2.52482	3.36699	4.76387	0.000178536	0.00461193	0.693301
ENSG00000168306.12	protein_coding	ACOX2	1	OTTHUMG00000159154.3	chr3	HAVANA	gene	58505136	58537319	-	-3.19653	0.109081	0.196091	-4.62894	0.00023786	0.00568212	0.690709
ENSG00000136250.11	protein_coding	AOAH	1	OTTHUMG00000023566.7	chr7	HAVANA	gene	36512949	36724549	-	2.7167	6.5737	0.745266	4.66672	0.000219462	0.00541571	0.69054
ENSG00000197457.9	protein_coding	STMN3	2	OTTHUMG00000032985.2	chr20	HAVANA	gene	63639705	63657682	-	-1.00162	0.499438	2.73263	-4.75911	0.00018035	0.00463468	0.68948
ENSG00000179862.6	protein_coding	CITED4	2	OTTHUMG00000007728.1	chr1	HAVANA	gene	40861051	40862366	-	-0.86015	0.550895	5.06997	-4.91208	0.000130537	0.00361645	0.687211
ENSG00000005884.17	protein_coding	ITGA3	2	OTTHUMG00000161890.6	chr17	HAVANA	gene	50055968	50090481	+	-0.740398	0.598574	5.86814	-4.93766	0.000123696	0.00346559	0.670788
ENSG00000234380.1	antisense	AP000330.8	2	OTTHUMG00000086233.1	chr21	HAVANA	gene	34745757	34784886	+	-1.68938	0.31006	1.7253	-4.62681	0.000238942	0.00568919	0.67022
ENSG00000110888.17	protein_coding	CAPRIN2	1	OTTHUMG00000169185.7	chr12	HAVANA	gene	30709552	30754951	-	-0.813115	0.569152	4.72823	-4.8812	0.000139312	0.00383816	0.668399
ENSG00000164093.16	protein_coding	PITX2	2	OTTHUMG00000132837.9	chr4	HAVANA	gene	110617423	110642123	-	0.963655	1.95024	4.56416	4.82149	0.000158032	0.00422127	0.66022
ENSG00000119686.9	protein_coding	FLVCR2	1	OTTHUMG00000171487.4	chr14	HAVANA	gene	75578617	75663214	+	2.22117	4.6627	0.868559	4.61524	0.000244908	0.00579976	0.658898
ENSG00000231925.11	protein_coding	TAPBP	1	OTTHUMG00000031090.5	chr6	HAVANA	gene	33299694	33314387	-	0.606485	1.52255	6.34627	4.94004	0.000123079	0.00345478	0.65442
ENSG00000246334.2	antisense	RP11-1334A24.4	2	OTTHUMG00000163400.1	chr5	HAVANA	gene	177438503	177447699	-	-1.75644	0.295977	1.99919	-4.66108	0.000222116	0.00544512	0.637256
ENSG00000101307.15	protein_coding	SIRPB1	1	OTTHUMG00000031676.10	chr20	HAVANA	gene	1563521	1620061	-	-2.99009	0.125862	-2.23947	-4.76612	0.000177687	0.00460388	0.63486
ENSG00000172986.12	protein_coding	GXYLT2	2	OTTHUMG00000158815.2	chr3	HAVANA	gene	72888073	72998138	+	0.901024	1.86739	3.94347	4.80751	0.000162774	0.00427892	0.632867
ENSG00000166963.12	protein_coding	MAP1A	1	OTTHUMG00000059756.5	chr15	HAVANA	gene	43510958	43531620	+	1.13553	2.19699	3.56321	4.72856	0.000192428	0.00487778	0.627589
ENSG00000205336.11	protein_coding	ADGRG1	1	OTTHUMG00000176742.22	chr16	HAVANA	gene	57610652	57665580	+	0.901543	1.86806	5.21544	4.86666	0.00014365	0.00392145	0.619697
ENSG00000138675.16	protein_coding	FGF5	2	OTTHUMG00000130288.2	chr4	HAVANA	gene	80266599	80336680	+	-1.30265	0.405381	2.05561	-4.66685	0.000219405	0.00541571	0.618828
ENSG00000166407.13	protein_coding	LMO1	2	OTTHUMG00000165833.2	chr11	HAVANA	gene	8224304	8268716	-	1.93623	3.82704	1.79752	4.59703	0.000254616	0.00599907	0.617531
ENSG00000181019.12	protein_coding	NQO1	1	OTTHUMG00000137575.2	chr16	HAVANA	gene	69706996	69726951	-	0.545907	1.45994	10.2467	5.00068	0.000108364	0.00313015	0.616611
ENSG00000137573.13	protein_coding	SULF1	2	OTTHUMG00000164466.5	chr8	HAVANA	gene	69466624	69660915	+	1.17528	2.25836	2.58501	4.67951	0.000213572	0.00531434	0.614675
ENSG00000228203.6	processed_transcript	AC017076.4	2	OTTHUMG00000151701.3	chr2	HAVANA	gene	6912277	6918709	-	-1.33867	0.395385	2.20312	-4.67361	0.00021627	0.00537251	0.607257
ENSG00000109452.12	protein_coding	INPP4B	2	OTTHUMG00000161341.2	chr4	HAVANA	gene	142023160	142847432	-	-1.52066	0.348526	1.60595	-4.62759	0.000238544	0.00568879	0.602494
ENSG00000070961.15	protein_coding	ATP2B1	2	OTTHUMG00000169946.4	chr12	HAVANA	gene	89588049	89709300	-	-1.3792	0.384432	4.10487	-4.80897	0.000162275	0.00427892	0.588869
ENSG00000184292.6	protein_coding	TACSTD2	2	OTTHUMG00000010067.1	chr1	HAVANA	gene	58575423	58577773	-	-0.832826	0.561428	4.13259	-4.80408	0.000163963	0.00430258	0.58661
ENSG00000164379.6	protein_coding	FOXQ1	2	OTTHUMG00000016160.2	chr6	HAVANA	gene	1312440	1314748	+	-2.80837	0.142757	-0.171036	-4.56834	0.000270703	0.00633412	0.571969
ENSG00000245648.1	antisense	RP11-277P12.20	2	OTTHUMG00000168533.4	chr12	HAVANA	gene	10363769	10398506	+	1.00327	2.00454	4.01256	4.80021	0.000165309	0.0043227	0.565068
ENSG00000124762.13	protein_coding	CDKN1A	2	OTTHUMG00000014603.3	chr6	HAVANA	gene	36676460	36687339	+	0.864292	1.82045	5.83234	4.88309	0.000138757	0.00382995	0.561195
ENSG00000258655.2	antisense	RP11-431H16.2	2	OTTHUMG00000170588.2	chr14	HAVANA	gene	32074946	32076793	-	-0.697133	0.616797	4.17044	-4.78748	0.000169825	0.00440983	0.552943
ENSG00000151778.10	protein_coding	SERP2	2	OTTHUMG00000016833.4	chr13	HAVANA	gene	44373665	44397714	+	-0.933848	0.52346	3.64224	-4.76062	0.000179773	0.00462785	0.54356
ENSG00000177685.16	protein_coding	EFCAB4A	2	OTTHUMG00000165267.7	chr11	HAVANA	gene	826144	831991	+	1.32438	2.50426	3.19947	4.68033	0.000213197	0.00531389	0.53775
ENSG00000082126.17	protein_coding	MPP4	1	OTTHUMG00000154525.7	chr2	HAVANA	gene	201644870	201698694	-	-2.1662	0.222797	-0.222717	-4.55168	0.000280521	0.00648242	0.536153
ENSG00000108984.14	protein_coding	MAP2K6	1	OTTHUMG00000180311.3	chr17	HAVANA	gene	69414698	69553861	+	1.36946	2.58373	2.19403	4.61255	0.00024632	0.00581838	0.532851
ENSG00000054793.13	protein_coding	ATP9A	1	OTTHUMG00000032751.3	chr20	HAVANA	gene	51596514	51768634	-	0.690604	1.61396	4.81989	4.80193	0.000164709	0.00431457	0.527257
ENSG00000164933.11	protein_coding	SLC25A32	2	OTTHUMG00000164790.5	chr8	HAVANA	gene	103398635	103415189	-	-0.644814	0.639575	5.78425	-4.8626	0.000144886	0.00393356	0.527245
ENSG00000141401.11	protein_coding	IMPA2	2	OTTHUMG00000131693.4	chr18	HAVANA	gene	11981025	12030883	+	0.840301	1.79042	6.75085	4.87592	0.000140873	0.00386687	0.495434
ENSG00000144476.5	protein_coding	ACKR3	2	OTTHUMG00000133295.4	chr2	HAVANA	gene	236567787	236582358	+	1.74602	3.35432	3.42949	4.56136	0.000274773	0.00639922	0.493217
ENSG00000023171.17	protein_coding	GRAMD1B	2	OTTHUMG00000166004.6	chr11	HAVANA	gene	123358428	123627774	+	-2.18804	0.219449	1.3331	-4.51997	0.000300215	0.00685252	0.487395
ENSG00000139428.11	protein_coding	MMAB	2	OTTHUMG00000169255.5	chr12	HAVANA	gene	109553737	109573874	-	0.722624	1.65018	5.76151	4.83632	0.000153156	0.00412055	0.485667
ENSG00000106927.11	protein_coding	AMBP	2	OTTHUMG00000020534.4	chr9	HAVANA	gene	114060127	114078472	-	2.59297	6.03341	0.584589	4.54944	0.000281869	0.00650349	0.473483
ENSG00000112977.15	protein_coding	DAP	1	OTTHUMG00000131041.3	chr5	HAVANA	gene	10679230	10761272	-	-0.713727	0.609743	8.43052	-4.89842	0.000134346	0.00371509	0.442128
ENSG00000157778.8	protein_coding	PSMG3	1	OTTHUMG00000119043.2	chr7	HAVANA	gene	1567330	1571005	-	-0.531483	0.691843	7.74233	-4.87888	0.000139994	0.00384984	0.430003
ENSG00000153574.8	protein_coding	RPIA	2	OTTHUMG00000130333.2	chr2	HAVANA	gene	88691644	88750935	+	-0.621604	0.649948	5.95395	-4.82332	0.000157423	0.00422012	0.411572
ENSG00000166250.11	protein_coding	CLMP	1	OTTHUMG00000166031.2	chr11	HAVANA	gene	123069865	123195281	-	-0.663408	0.631385	5.82724	-4.82012	0.000158493	0.004226	0.409305
ENSG00000100364.18	protein_coding	KIAA0930	1	OTTHUMG00000151263.4	chr22	HAVANA	gene	45190338	45240769	-	0.546416	1.46045	6.23276	4.81831	0.000159098	0.00422702	0.405013
ENSG00000145220.13	protein_coding	LYAR	2	OTTHUMG00000125477.19	chr4	HAVANA	gene	4267701	4290169	-	-0.700993	0.615149	7.82294	-4.86819	0.000143188	0.00391599	0.403365
ENSG00000172893.15	protein_coding	DHCR7	1	OTTHUMG00000167346.3	chr11	HAVANA	gene	71428193	71452868	-	0.879582	1.83984	6.16096	4.80799	0.00016261	0.00427892	0.399362
ENSG00000222009.8	protein_coding	BTBD19	2	OTTHUMG00000008493.3	chr1	HAVANA	gene	44808482	44815585	+	-1.9367	0.261213	1.50596	-4.47917	0.000327636	0.00736564	0.392061
ENSG00000075426.11	protein_coding	FOSL2	1	OTTHUMG00000097832.6	chr2	HAVANA	gene	28392448	28417312	+	-1.06847	0.476823	3.09836	-4.63293	0.000235842	0.0056606	0.391547
ENSG00000260077.1	lincRNA	RP11-254F7.2	2	OTTHUMG00000175729.1	chr2	HAVANA	gene	10039092	10040663	-	1.41568	2.66785	1.9598	4.492	0.000318748	0.00718749	0.374024
ENSG00000122145.14	protein_coding	TBX22	2	OTTHUMG00000021901.2	chrX	HAVANA	gene	80014756	80031769	+	2.38192	5.21231	0.660098	4.45807	0.000342803	0.0076261	0.35513
ENSG00000166920.12	protein_coding	C15orf48	2	OTTHUMG00000131424.3	chr15	HAVANA	gene	45430529	45448761	+	0.992581	1.98974	4.33344	4.70026	0.000204349	0.00513629	0.349569
ENSG00000169583.12	protein_coding	CLIC3	2	OTTHUMG00000020954.3	chr9	HAVANA	gene	136994635	136996803	-	4.44373	21.7619	0.31538	4.663	0.000221208	0.00543181	0.343253
ENSG00000167191.11	protein_coding	GPRC5B	2	OTTHUMG00000131460.4	chr16	HAVANA	gene	19856691	19886167	-	0.797094	1.7376	5.101	4.72764	0.000192801	0.00487894	0.315059
ENSG00000072274.12	protein_coding	TFRC	2	OTTHUMG00000155714.2	chr3	HAVANA	gene	196027183	196082189	-	-0.755437	0.592367	7.33527	-4.81658	0.000159681	0.00423494	0.3032
ENSG00000067057.16	protein_coding	PFKP	2	OTTHUMG00000017556.6	chr10	HAVANA	gene	3066333	3137712	+	-0.590279	0.664215	8.64921	-4.82896	0.000155557	0.00417762	0.290331
ENSG00000213462.4	protein_coding	ERV3-1	2	OTTHUMG00000165023.4	chr7	HAVANA	gene	64990809	65006743	-	1.03131	2.04388	2.50813	4.51855	0.000301127	0.00686283	0.288973
ENSG00000135074.15	protein_coding	ADAM19	2	OTTHUMG00000130242.2	chr5	HAVANA	gene	157395534	157575775	-	-1.11316	0.462282	3.34014	-4.59579	0.000255288	0.00600169	0.270027
ENSG00000064886.13	protein_coding	CHI3L2	1	OTTHUMG00000012174.8	chr1	HAVANA	gene	111200771	111243440	+	3.30842	9.9068	-0.568098	4.52143	0.000299277	0.00685211	0.267589
ENSG00000053918.16	protein_coding	KCNQ1	2	OTTHUMG00000009900.9	chr11	HAVANA	gene	2444684	2849110	+	3.84934	14.4134	-1.70015	4.65857	0.000223307	0.00545637	0.256107
ENSG00000154122.13	protein_coding	ANKH	2	OTTHUMG00000090539.4	chr5	HAVANA	gene	14704800	14871785	-	-0.694227	0.61804	6.07552	-4.75095	0.000183499	0.00470748	0.2455
ENSG00000130176.7	protein_coding	CNN1	1	OTTHUMG00000182033.2	chr19	HAVANA	gene	11538717	11550323	+	3.71415	13.1241	-0.0534102	4.62153	0.000241644	0.00574434	0.242753
ENSG00000204610.12	protein_coding	TRIM15	2	OTTHUMG00000031031.3	chr6	HAVANA	gene	30163206	30172696	+	1.38909	2.61913	1.97757	4.43547	0.00035984	0.00789096	0.239827
ENSG00000167468.16	protein_coding	GPX4	1	OTTHUMG00000181874.10	chr19	HAVANA	gene	1103926	1106791	+	0.633914	1.55177	9.31956	4.80877	0.000162343	0.00427892	0.232042
ENSG00000108106.13	protein_coding	UBE2S	1	OTTHUMG00000180811.4	chr19	HAVANA	gene	55399745	55407777	-	-0.643904	0.639979	5.92363	-4.73011	0.000191796	0.00487004	0.231713
ENSG00000166295.8	protein_coding	ANAPC16	2	OTTHUMG00000018433.3	chr10	HAVANA	gene	72216000	72235860	+	0.488218	1.40271	7.22203	4.76552	0.000177916	0.00460388	0.223772
ENSG00000184009.10	protein_coding	ACTG1	2	OTTHUMG00000177955.8	chr17	HAVANA	gene	81509971	81523847	-	0.470565	1.38565	11.8213	4.83786	0.000152658	0.00411458	0.217515
ENSG00000170099.5	protein_coding	SERPINA6	2	OTTHUMG00000171346.1	chr14	HAVANA	gene	94304248	94323394	-	3.40475	10.5909	0.16897	4.44597	0.000351821	0.00778188	0.215339
ENSG00000171310.10	protein_coding	CHST11	2	OTTHUMG00000169803.3	chr12	HAVANA	gene	104455295	104762014	+	-0.655954	0.634656	4.72583	-4.65858	0.0002233	0.00545637	0.206932
ENSG00000196937.10	protein_coding	FAM3C	2	OTTHUMG00000156979.2	chr7	HAVANA	gene	121348851	121396364	-	-0.946026	0.51906	4.17838	-4.62889	0.000237883	0.00568212	0.206888
ENSG00000143013.12	protein_coding	LMO4	2	OTTHUMG00000010248.2	chr1	HAVANA	gene	87328468	87348923	+	0.552835	1.46697	6.69992	4.73474	0.000189918	0.00484309	0.202805
ENSG00000072134.15	protein_coding	EPN2	1	OTTHUMG00000187034.3	chr17	HAVANA	gene	19215615	19336715	+	-0.787716	0.57926	4.11854	-4.5891	0.000258962	0.00606891	0.166042
ENSG00000064205.10	protein_coding	WISP2	2	OTTHUMG00000033071.2	chr20	HAVANA	gene	44714844	44728509	+	4.91552	30.1799	1.14817	4.54155	0.000286662	0.00660387	0.164772
ENSG00000134909.18	protein_coding	ARHGAP32	1	OTTHUMG00000165774.4	chr11	HAVANA	gene	128965060	129279324	-	0.622727	1.53978	5.16234	4.64251	0.000231078	0.0055822	0.14944
ENSG00000006451.7	protein_coding	RALA	2	OTTHUMG00000128775.4	chr7	HAVANA	gene	39623483	39708124	+	-0.591238	0.663773	6.051	-4.70184	0.000203665	0.00512774	0.146057
ENSG00000197771.12	protein_coding	MCMBP	2	OTTHUMG00000019159.4	chr10	HAVANA	gene	119829404	119892556	-	-0.556723	0.679845	6.5428	-4.72048	0.000195758	0.00494537	0.143957
ENSG00000105612.8	protein_coding	DNASE2	2	OTTHUMG00000180535.2	chr19	HAVANA	gene	12875211	12881468	-	0.692421	1.61599	5.41273	4.64047	0.000232086	0.00558844	0.135587
ENSG00000225361.3	antisense	RP11-426A6.7	1	OTTHUMG00000020905.3	chr9	HAVANA	gene	135462727	135480777	-	1.1711	2.25184	2.73197	4.43526	0.000360003	0.00789096	0.135012
ENSG00000108846.15	protein_coding	ABCC3	1	OTTHUMG00000162245.5	chr17	HAVANA	gene	50634777	50692252	+	-0.648025	0.638153	6.04537	-4.68838	0.000209579	0.00525004	0.129273
ENSG00000106546.13	protein_coding	AHR	2	OTTHUMG00000149967.4	chr7	HAVANA	gene	16916359	17346152	+	-1.23705	0.42424	5.98648	-4.68548	0.000210876	0.00527367	0.122662
ENSG00000183696.13	protein_coding	UPP1	2	OTTHUMG00000129253.3	chr7	HAVANA	gene	48088628	48108733	+	-0.581251	0.668384	5.36792	-4.66961	0.000218117	0.00540936	0.122643
ENSG00000203780.10	protein_coding	FANK1	2	OTTHUMG00000019241.4	chr10	HAVANA	gene	125896539	126009592	+	1.1902	2.28184	2.17464	4.39047	0.000396379	0.00863746	0.121031
ENSG00000101236.16	protein_coding	RNF24	2	OTTHUMG00000031770.4	chr20	HAVANA	gene	3927309	4015582	-	-0.597312	0.660984	5.09578	-4.64374	0.000230473	0.00557662	0.117912
ENSG00000134013.15	protein_coding	LOXL2	1	OTTHUMG00000163797.5	chr8	HAVANA	gene	23297189	23425328	-	-0.562168	0.677284	6.05114	-4.66707	0.0002193	0.00541571	0.112914
ENSG00000175155.8	protein_coding	YPEL2	2	OTTHUMG00000179378.1	chr17	HAVANA	gene	59331689	59401729	+	2.49598	5.64113	1.93076	4.3213	0.000460019	0.00978115	0.0957767
ENSG00000131791.7	protein_coding	PRKAB2	2	OTTHUMG00000014032.3	chr1	HAVANA	gene	147155106	147172550	-	1.0195	2.02721	4.18458	4.53801	0.000288842	0.0066438	0.0913363
ENSG00000162545.5	protein_coding	CAMK2N1	2	OTTHUMG00000002837.1	chr1	HAVANA	gene	20482391	20486220	-	-0.887244	0.540646	2.60444	-4.5068	0.000308801	0.00698434	0.0852764
ENSG00000128849.10	protein_coding	CGNL1	2	OTTHUMG00000166485.3	chr15	HAVANA	gene	57375967	57550727	+	1.57922	2.98809	1.84443	4.32466	0.000456697	0.00972438	0.077429
ENSG00000087842.10	protein_coding	PIR	2	OTTHUMG00000021176.1	chrX	HAVANA	gene	15384799	15493564	-	0.54989	1.46397	9.07987	4.73433	0.000190084	0.00484309	0.0764025
ENSG00000276600.4	protein_coding	RAB7B	2	OTTHUMG00000189246.1	chr1	HAVANA	gene	205976740	206003461	-	2.56485	5.91695	0.133221	4.34559	0.000436568	0.0093492	0.0700869
ENSG00000162337.11	protein_coding	LRP5	1	OTTHUMG00000167570.1	chr11	HAVANA	gene	68312609	68449275	+	-0.843098	0.557445	5.24496	-4.61933	0.000242782	0.0057622	0.0668301
ENSG00000162878.12	protein_coding	PKDCC	2	OTTHUMG00000152303.4	chr2	HAVANA	gene	42048020	42058528	+	1.54102	2.91	1.41313	4.30721	0.000474204	0.00999718	0.066405
ENSG00000078579.8	protein_coding	FGF20	2	OTTHUMG00000096964.2	chr8	HAVANA	gene	16992169	17002181	-	3.93207	15.2641	-1.10826	4.52041	0.00029993	0.00685252	0.0484228
ENSG00000100739.10	protein_coding	BDKRB1	2	OTTHUMG00000171412.1	chr14	HAVANA	gene	96255824	96268967	+	1.10771	2.15504	3.33511	4.44083	0.000355728	0.0078318	0.0440929
ENSG00000179604.9	protein_coding	CDC42EP4	1	OTTHUMG00000178419.2	chr17	HAVANA	gene	73283624	73312175	-	0.656718	1.57649	6.60387	4.66478	0.000220373	0.0054292	0.03568
ENSG00000117122.13	protein_coding	MFAP2	2	OTTHUMG00000002290.1	chr1	HAVANA	gene	16974502	16980835	-	1.79131	3.4613	0.80644	4.28578	0.000496632	0.0103819	0.0333216
ENSG00000154217.14	protein_coding	PITPNC1	1	OTTHUMG00000179602.2	chr17	HAVANA	gene	67377281	67697261	+	-0.850769	0.554489	3.81576	-4.52703	0.000295707	0.00678079	0.0113692
ENSG00000120949.14	protein_coding	TNFRSF8	2	OTTHUMG00000001827.4	chr1	HAVANA	gene	12063377	12144207	+	-0.818673	0.566963	4.75664	-4.55329	0.000279554	0.00648017	0.00968432
ENSG00000214063.10	protein_coding	TSPAN4	2	OTTHUMG00000133305.6	chr11	HAVANA	gene	842808	867116	+	-0.713358	0.609899	5.99336	-4.63008	0.000237278	0.00568212	0.0041277
ENSG00000204616.10	protein_coding	TRIM31	2	OTTHUMG00000031064.2	chr6	HAVANA	gene	30102897	30113106	-	3.25454	9.54365	-0.62515	4.39091	0.000396003	0.00863746	0.0033959
ENSG00000198286.9	protein_coding	CARD11	2	OTTHUMG00000023023.6	chr7	HAVANA	gene	2906141	3043945	-	-0.91624	0.529888	2.58084	-4.41988	0.000372098	0.00814409	0.00309243
ENSG00000130640.13	protein_coding	TUBGCP2	2	OTTHUMG00000019319.6	chr10	HAVANA	gene	133278630	133312337	-	-0.610111	0.655146	6.40543	-4.6472	0.000228778	0.00555028	0.0013663
ENSG00000148450.12	protein_coding	MSRB2	2	OTTHUMG00000017812.3	chr10	HAVANA	gene	23095506	23122013	+	0.64855	1.56759	5.56084	4.59674	0.000254774	0.00599907	0.000352997
ENSG00000111653.19	protein_coding	ING4	2	OTTHUMG00000141274.6	chr12	HAVANA	gene	6650280	6663148	-	0.993673	1.99125	3.84521	4.44587	0.000351895	0.00778188	-0.0082492
ENSG00000177374.12	protein_coding	HIC1	2	OTTHUMG00000177635.10	chr17	HAVANA	gene	2054154	2063241	+	-0.829905	0.562566	3.94168	-4.51551	0.000303096	0.00687897	-0.0128687
ENSG00000108821.13	protein_coding	COL1A1	2	OTTHUMG00000148674.9	chr17	HAVANA	gene	50183289	50201632	-	0.762207	1.69608	9.95629	4.69608	0.000206174	0.00517344	-0.0160596
ENSG00000140279.12	protein_coding	DUOX2	2	OTTHUMG00000131355.3	chr15	HAVANA	gene	45092650	45114344	-	-1.68452	0.311107	1.10232	-4.30909	0.000472286	0.00997085	-0.0386988
ENSG00000167779.7	protein_coding	IGFBP6	1	OTTHUMG00000169773.1	chr12	HAVANA	gene	53097436	53102345	+	0.598372	1.51401	6.11114	4.5901	0.000258407	0.00606544	-0.0667126
ENSG00000123992.19	protein_coding	DNPEP	1	OTTHUMG00000058919.7	chr2	HAVANA	gene	219373527	219400022	-	0.503572	1.41772	6.68624	4.61479	0.000245143	0.00579976	-0.0714267
ENSG00000179097.5	protein_coding	HTR1F	2	OTTHUMG00000159008.1	chr3	HAVANA	gene	87990696	87993835	+	-2.54217	0.171685	-0.774398	-4.25399	0.000531897	0.0109957	-0.073615
ENSG00000196503.4	protein_coding	ARL9	2	OTTHUMG00000184000.3	chr4	HAVANA	gene	56505209	56525481	+	1.00664	2.00923	3.62275	4.37703	0.000408	0.00881338	-0.0967057
ENSG00000180573.9	protein_coding	HIST1H2AC	2	OTTHUMG00000014428.2	chr6	HAVANA	gene	26124145	26139116	+	-0.617824	0.651653	5.42691	-4.55358	0.000279383	0.00648017	-0.0971721
ENSG00000119537.16	protein_coding	KDSR	2	OTTHUMG00000132792.8	chr18	HAVANA	gene	63327726	63367510	-	-0.71585	0.608846	5.60801	-4.565	0.000272646	0.00636957	-0.108835
ENSG00000137502.9	protein_coding	RAB30	1	OTTHUMG00000166973.3	chr11	HAVANA	gene	82973133	83071923	-	1.39787	2.63513	3.38527	4.37347	0.000411138	0.00885551	-0.118763
ENSG00000188211.8	protein_coding	NCR3LG1	2	OTTHUMG00000165913.3	chr11	HAVANA	gene	17351726	17377341	+	-1.24823	0.420965	2.55751	-4.31025	0.000471102	0.00996881	-0.139513
ENSG00000177602.5	protein_coding	GSG2	2	OTTHUMG00000090703.1	chr17	HAVANA	gene	3723903	3726699	+	-0.898428	0.536471	2.7576	-4.34701	0.000435231	0.00933397	-0.155885
ENSG00000123095.5	protein_coding	BHLHE41	2	OTTHUMG00000169174.1	chr12	HAVANA	gene	26120026	26125127	-	1.24262	2.36628	6.21741	4.56336	0.000273599	0.00638183	-0.156074
ENSG00000170075.8	protein_coding	GPR37L1	2	OTTHUMG00000035924.2	chr1	HAVANA	gene	202122858	202133592	+	3.40689	10.6066	-0.860375	4.37703	0.000407998	0.00881338	-0.159291
ENSG00000276045.3	protein_coding	ORAI1	2	OTTHUMG00000169073.3	chr12	HAVANA	gene	121626550	121642677	+	-0.575526	0.671041	5.51886	-4.53662	0.000289703	0.00665336	-0.161003
ENSG00000145555.14	protein_coding	MYO10	1	OTTHUMG00000161822.4	chr5	HAVANA	gene	16661914	16936276	-	-0.557957	0.679263	6.29296	-4.55703	0.00027733	0.00644868	-0.173031
ENSG00000026559.13	protein_coding	KCNG1	2	OTTHUMG00000032745.8	chr20	HAVANA	gene	51003656	51023129	-	-0.811372	0.56984	4.42454	-4.46202	0.000339915	0.00757762	-0.173215
ENSG00000186204.14	protein_coding	CYP4F12	2	OTTHUMG00000164477.13	chr19	HAVANA	gene	15672757	15697174	+	3.84934	14.4134	-0.91251	4.37858	0.000406645	0.00881338	-0.178004
ENSG00000164086.9	protein_coding	DUSP7	2	OTTHUMG00000157819.1	chr3	HAVANA	gene	52048919	52056550	-	-0.75407	0.592929	5.38243	-4.50803	0.000307988	0.00697654	-0.200883
ENSG00000189184.11	protein_coding	PCDH18	1	OTTHUMG00000161348.2	chr4	HAVANA	gene	137518918	137532494	-	2.18364	4.54298	2.03796	4.1927	0.000607203	0.0121481	-0.211127
ENSG00000170425.3	protein_coding	ADORA2B	2	OTTHUMG00000059140.2	chr17	HAVANA	gene	15944917	15975746	+	-0.634138	0.644326	5.55586	-4.51564	0.000303011	0.00687897	-0.22058
ENSG00000265962.1	antisense	RP11-674N23.1	2	OTTHUMG00000178955.1	chr18	HAVANA	gene	8695856	8707621	-	2.97862	7.88232	0.147829	4.20281	0.000594069	0.0119657	-0.22654
ENSG00000137285.9	protein_coding	TUBB2B	2	OTTHUMG00000014143.2	chr6	HAVANA	gene	3224261	3231730	-	1.48223	2.7938	2.91991	4.24304	0.000544615	0.0111965	-0.232309
ENSG00000116133.11	protein_coding	DHCR24	2	OTTHUMG00000009989.1	chr1	HAVANA	gene	54849633	54887218	-	0.897253	1.86252	5.25818	4.47106	0.000333382	0.00748351	-0.232899
ENSG00000119862.12	protein_coding	LGALSL	1	OTTHUMG00000129541.6	chr2	HAVANA	gene	64453969	64461381	+	-0.928182	0.52552	4.44563	-4.44401	0.000353303	0.00780145	-0.242772
ENSG00000162654.8	protein_coding	GBP4	2	OTTHUMG00000010663.1	chr1	HAVANA	gene	89181148	89198932	-	1.29096	2.44691	2.39023	4.21756	0.000575432	0.0116691	-0.245067
ENSG00000090520.11	protein_coding	DNAJB11	2	OTTHUMG00000156614.2	chr3	HAVANA	gene	186567403	186585800	+	-0.562344	0.677201	6.10833	-4.51532	0.000303219	0.00687897	-0.254905
ENSG00000145536.15	protein_coding	ADAMTS16	2	OTTHUMG00000161663.1	chr5	HAVANA	gene	5140330	5320304	+	1.02583	2.03613	2.7112	4.237	0.000551766	0.0113123	-0.265114
ENSG00000033170.16	protein_coding	FUT8	1	OTTHUMG00000142818.4	chr14	HAVANA	gene	65410592	65744121	+	-1.20411	0.434037	4.67706	-4.46213	0.00033983	0.00757762	-0.275893
ENSG00000154040.20	protein_coding	CABYR	2	OTTHUMG00000037365.11	chr18	HAVANA	gene	24138956	24161603	+	0.758582	1.69183	4.11782	4.36191	0.000421491	0.00905234	-0.279617
ENSG00000171617.13	protein_coding	ENC1	1	OTTHUMG00000102059.6	chr5	HAVANA	gene	74627406	74641424	-	-1.68838	0.310276	2.31174	-4.25131	0.000534979	0.0110289	-0.280219
ENSG00000188227.12	protein_coding	ZNF793	1	OTTHUMG00000182003.4	chr19	HAVANA	gene	37506939	37548762	+	1.3533	2.55496	2.04647	4.18537	0.000616897	0.0122926	-0.28181
ENSG00000240065.7	protein_coding	PSMB9	2	OTTHUMG00000031287.6	chr6	HAVANA	gene	32844136	32859585	+	0.68366	1.60621	5.15106	4.44948	0.00034918	0.00774483	-0.28347
ENSG00000140416.20	protein_coding	TPM1	2	OTTHUMG00000132803.13	chr15	HAVANA	gene	63042632	63071915	+	0.650736	1.56997	8.35247	4.55244	0.000280063	0.0064819	-0.28674
ENSG00000183486.12	protein_coding	MX2	1	OTTHUMG00000086753.6	chr21	HAVANA	gene	41361943	41409390	+	1.19199	2.28467	2.34471	4.18329	0.000619687	0.0123317	-0.297621
ENSG00000154928.16	protein_coding	EPHB1	1	OTTHUMG00000159804.4	chr3	HAVANA	gene	134597801	135260467	+	-1.58611	0.333068	0.936342	-4.15955	0.00065234	0.0128443	-0.307824
ENSG00000165272.15	protein_coding	AQP3	2	OTTHUMG00000019769.4	chr9	HAVANA	gene	33441154	33447633	-	-0.863738	0.549527	2.75004	-4.32536	0.000456013	0.00972372	-0.309671
ENSG00000120889.12	protein_coding	TNFRSF10B	2	OTTHUMG00000097826.2	chr8	HAVANA	gene	23020133	23069179	-	-0.862001	0.550189	6.16275	-4.48295	0.00032499	0.00731718	-0.315551
ENSG00000175294.5	protein_coding	CATSPER1	2	OTTHUMG00000166668.1	chr11	HAVANA	gene	66016752	66026517	-	-1.30613	0.404404	1.83774	-4.20911	0.000586045	0.0118521	-0.322741
ENSG00000163624.5	protein_coding	CDS1	2	OTTHUMG00000130428.2	chr4	HAVANA	gene	84582979	84651338	+	1.20143	2.29967	2.75449	4.20187	0.000595285	0.011974	-0.3305
ENSG00000090238.11	protein_coding	YPEL3	2	OTTHUMG00000176853.1	chr16	HAVANA	gene	30092314	30096915	-	1.62465	3.08368	1.62462	4.1062	0.000732211	0.0140438	-0.340908
ENSG00000185585.19	protein_coding	OLFML2A	2	OTTHUMG00000020663.3	chr9	HAVANA	gene	124777158	124814885	+	0.981525	1.97455	3.23455	4.27886	0.000504098	0.0105232	-0.342356
ENSG00000105889.14	protein_coding	STEAP1B	2	OTTHUMG00000152529.4	chr7	HAVANA	gene	22419444	22632925	-	-0.777437	0.583402	4.61089	-4.39542	0.000392176	0.00857095	-0.350277
ENSG00000153395.9	protein_coding	LPCAT1	2	OTTHUMG00000131017.4	chr5	HAVANA	gene	1456480	1523977	-	-0.733124	0.6016	5.77862	-4.46353	0.000338815	0.00757762	-0.358523
ENSG00000164465.18	protein_coding	DCBLD1	2	OTTHUMG00000015455.3	chr6	HAVANA	gene	117453817	117569858	+	0.517723	1.43169	5.62436	4.44148	0.000355231	0.0078318	-0.364845
ENSG00000215440.11	protein_coding	NPEPL1	2	OTTHUMG00000033060.7	chr20	HAVANA	gene	58689131	58719238	+	0.754887	1.6875	4.10792	4.31357	0.000467747	0.00991716	-0.372579
ENSG00000183044.11	protein_coding	ABAT	1	OTTHUMG00000048201.5	chr16	HAVANA	gene	8674565	8784575	+	3.69211	12.9251	-0.628455	4.2554	0.000530281	0.0109775	-0.381494
ENSG00000101255.10	protein_coding	TRIB3	2	OTTHUMG00000031627.5	chr20	HAVANA	gene	362835	397559	+	-0.74022	0.598648	6.96466	-4.46174	0.000340116	0.00757762	-0.381558
ENSG00000254369.6	antisense	HOXA-AS3	2	OTTHUMG00000158092.4	chr7	HAVANA	gene	27129977	27155928	+	1.86784	3.64985	0.444794	4.0709	0.000790423	0.0147082	-0.385965
ENSG00000184117.11	protein_coding	NIPSNAP1	1	OTTHUMG00000151294.3	chr22	HAVANA	gene	29554808	29581337	-	0.78551	1.7237	5.14526	4.37743	0.000407651	0.00881338	-0.387884
ENSG00000125968.8	protein_coding	ID1	2	OTTHUMG00000032181.1	chr20	HAVANA	gene	31605283	31606515	+	0.64849	1.56753	8.84774	4.49523	0.000316551	0.00714877	-0.419625
ENSG00000108370.16	protein_coding	RGS9	2	OTTHUMG00000179349.2	chr17	HAVANA	gene	65100812	65227703	+	-0.883482	0.542058	2.83029	-4.20378	0.000592832	0.0119569	-0.424348
ENSG00000270504.1	antisense	RP11-420L9.5	2	OTTHUMG00000185108.1	chr6	HAVANA	gene	3751111	3753871	+	1.37492	2.59354	1.90685	4.07276	0.000787237	0.0146856	-0.440408
ENSG00000156265.15	protein_coding	MAP3K7CL	2	OTTHUMG00000078806.7	chr21	HAVANA	gene	29077471	29175889	+	-1.60441	0.328869	1.3495	-4.09335	0.000752882	0.0142047	-0.443011
ENSG00000179674.3	protein_coding	ARL14	2	OTTHUMG00000159031.1	chr3	HAVANA	gene	160677159	160678452	+	1.57097	2.97105	2.00779	4.08557	0.000765676	0.0144278	-0.44925
ENSG00000177427.12	protein_coding	MIEF2	1	OTTHUMG00000059392.4	chr17	HAVANA	gene	18260534	18266552	+	0.933498	1.9099	3.162	4.20099	0.000596419	0.0119806	-0.45677
ENSG00000179314.14	protein_coding	WSCD1	2	OTTHUMG00000177794.6	chr17	HAVANA	gene	6057807	6124427	+	-3.32553	0.0997507	-1.30679	-4.06853	0.000794491	0.014755	-0.457655
ENSG00000221866.9	protein_coding	PLXNA4	2	OTTHUMG00000155108.3	chr7	HAVANA	gene	132123332	132648688	-	-3.12453	0.114663	-1.18704	-4.05326	0.000821228	0.0151116	-0.46247
ENSG00000151702.16	protein_coding	FLI1	1	OTTHUMG00000165792.4	chr11	HAVANA	gene	128686535	128813267	+	-1.80779	0.285628	1.60544	-4.10568	0.000733046	0.0140438	-0.463363
ENSG00000151632.17	protein_coding	AKR1C2	2	OTTHUMG00000017584.4	chr10	HAVANA	gene	4987400	5018031	-	0.959758	1.94498	7.2733	4.45108	0.000347987	0.00772988	-0.465105
ENSG00000134363.11	protein_coding	FST	2	OTTHUMG00000131183.4	chr5	HAVANA	gene	53480409	53487134	+	-1.89539	0.2688	1.16386	-4.03957	0.000845976	0.0155096	-0.467272
ENSG00000134470.20	protein_coding	IL15RA	1	OTTHUMG00000017612.6	chr10	HAVANA	gene	5943639	5978187	-	-0.549245	0.683377	6.85199	-4.43988	0.000356452	0.00783617	-0.469077
ENSG00000144959.9	protein_coding	NCEH1	1	OTTHUMG00000156872.6	chr3	HAVANA	gene	172630249	172711218	-	-1.05936	0.479846	3.60039	-4.26345	0.000521141	0.0108184	-0.479906
ENSG00000152137.6	protein_coding	HSPB8	1	OTTHUMG00000168932.2	chr12	HAVANA	gene	119178642	119221131	+	0.783735	1.72158	5.57285	4.36653	0.000417321	0.00897572	-0.484521
ENSG00000251562.8	lincRNA	MALAT1	2	OTTHUMG00000166322.5	chr11	HAVANA	gene	65497688	65506516	+	0.888077	1.85071	8.85734	4.46576	0.000337195	0.00755774	-0.488112
ENSG00000148218.15	protein_coding	ALAD	2	OTTHUMG00000020522.5	chr9	HAVANA	gene	113386317	113401333	-	0.731909	1.66084	4.59125	4.30605	0.000475393	0.0100081	-0.491517
ENSG00000117228.9	protein_coding	GBP1	2	OTTHUMG00000010614.3	chr1	HAVANA	gene	89052319	89065360	-	0.822837	1.76888	4.60194	4.30349	0.000478021	0.0100351	-0.498604
ENSG00000267764.1	antisense	RP11-484L8.1	2	OTTHUMG00000180025.1	chr18	HAVANA	gene	48826051	48834770	-	-2.67551	0.156528	-1.92149	-4.10162	0.000739519	0.0141065	-0.49879
ENSG00000265096.1	antisense	C1QTNF1-AS1	1	OTTHUMG00000132159.2	chr17	HAVANA	gene	79019209	79027655	-	1.04211	2.05924	2.71893	4.12224	0.000707216	0.0136719	-0.498902
ENSG00000011523.13	protein_coding	CEP68	1	OTTHUMG00000129538.3	chr2	HAVANA	gene	65056366	65087004	+	0.514774	1.42877	5.84162	4.37791	0.000407228	0.00881338	-0.507038
ENSG00000108395.13	protein_coding	TRIM37	1	OTTHUMG00000179360.2	chr17	HAVANA	gene	58982638	59106921	-	0.776359	1.7128	4.76286	4.3042	0.000477288	0.0100338	-0.510896
ENSG00000213694.3	protein_coding	S1PR3	2	OTTHUMG00000020173.2	chr9	HAVANA	gene	88991447	89005010	+	-0.732823	0.601725	4.51633	-4.30984	0.00047152	0.00996881	-0.517057
ENSG00000196611.4	protein_coding	MMP1	2	OTTHUMG00000048192.1	chr11	HAVANA	gene	102789920	102798160	-	-2.89914	0.134052	-1.26826	-4.07801	0.000778325	0.0145924	-0.524317
ENSG00000275342.4	protein_coding	PRAG1	2	OTTHUMG00000163709.3	chr8	HAVANA	gene	8317736	8386498	-	-1.04037	0.486202	3.51888	-4.23418	0.000555134	0.0113412	-0.540887
ENSG00000256234.1	antisense	RP11-283G6.4	2	OTTHUMG00000169176.1	chr12	HAVANA	gene	26211164	26335856	-	3.30527	9.88522	-0.247766	3.98353	0.000955359	0.0170331	-0.578103
ENSG00000109743.10	protein_coding	BST1	1	OTTHUMG00000097739.2	chr4	HAVANA	gene	15702950	15738313	+	0.664007	1.58448	4.22611	4.22791	0.000562716	0.0114737	-0.578805
ENSG00000147454.13	protein_coding	SLC25A37	1	OTTHUMG00000163865.1	chr8	HAVANA	gene	23528805	23575463	+	-0.511419	0.701532	6.62079	-4.38157	0.000404035	0.00879145	-0.581078
ENSG00000131459.12	protein_coding	GFPT2	2	OTTHUMG00000163442.5	chr5	HAVANA	gene	180300690	180353387	-	-0.794049	0.576723	6.1151	-4.37364	0.000410984	0.00885551	-0.585344
ENSG00000146072.6	protein_coding	TNFRSF21	2	OTTHUMG00000014796.1	chr6	HAVANA	gene	47231532	47309905	-	-1.47231	0.360406	2.63608	-4.10059	0.000741159	0.0141065	-0.590049
ENSG00000143367.15	protein_coding	TUFT1	2	OTTHUMG00000012536.3	chr1	HAVANA	gene	151540305	151583583	+	1.25263	2.38275	3.14572	4.06254	0.000804872	0.0148473	-0.591725
ENSG00000141448.8	protein_coding	GATA6	2	OTTHUMG00000131767.2	chr18	HAVANA	gene	22169443	22202528	+	-0.548265	0.683842	5.65606	-4.33412	0.00044748	0.00956914	-0.601601
ENSG00000257337.6	antisense	RP11-983P16.4	2	OTTHUMG00000169806.5	chr12	HAVANA	gene	53014596	53054438	-	1.9641	3.90168	0.972207	3.94901	0.00102972	0.0180776	-0.621338
ENSG00000216775.3	transcribed_unprocessed_pseudogene	RP1-152L7.5	2	OTTHUMG00000014854.3	chr6	HAVANA	gene	52664366	52669155	+	0.764354	1.69861	4.07672	4.19743	0.000601027	0.0120443	-0.625056
ENSG00000162976.12	protein_coding	PQLC3	1	OTTHUMG00000119055.5	chr2	HAVANA	gene	11155198	11178874	+	0.964333	1.95116	4.47575	4.22133	0.000570768	0.0115903	-0.632631
ENSG00000213085.9	protein_coding	CFAP45	2	OTTHUMG00000035432.4	chr1	HAVANA	gene	159872364	159900163	-	-1.61296	0.326927	0.179959	-3.94795	0.00103209	0.018098	-0.640511
ENSG00000249042.5	antisense	CTD-2015H6.3	2	OTTHUMG00000162534.1	chr5	HAVANA	gene	80482293	80488063	-	0.892661	1.8566	3.0656	4.12264	0.000706602	0.0136719	-0.642018
ENSG00000143443.9	protein_coding	C1orf56	2	OTTHUMG00000035159.2	chr1	HAVANA	gene	151047740	151051986	+	0.849508	1.80189	3.02244	4.09808	0.000745214	0.0141316	-0.648317
ENSG00000142867.12	protein_coding	BCL10	2	OTTHUMG00000009965.2	chr1	HAVANA	gene	85266248	85277090	-	-0.85467	0.552992	4.26043	-4.23716	0.000551582	0.0113123	-0.651609
ENSG00000139083.10	protein_coding	ETV6	1	OTTHUMG00000168538.2	chr12	HAVANA	gene	11649854	11895402	+	-0.71616	0.608715	4.48542	-4.24445	0.000542966	0.0111781	-0.65389
ENSG00000198728.10	protein_coding	LDB1	2	OTTHUMG00000018950.1	chr10	HAVANA	gene	102107560	102120453	-	0.826013	1.77278	3.64536	4.16635	0.000642812	0.012707	-0.659702
ENSG00000166816.13	protein_coding	LDHD	2	OTTHUMG00000137605.2	chr16	HAVANA	gene	75111860	75116771	-	3.27538	9.68247	-0.857936	4.06756	0.000796169	0.014755	-0.659918
ENSG00000008441.16	protein_coding	NFIX	1	OTTHUMG00000180726.4	chr19	HAVANA	gene	12995608	13098796	+	0.589051	1.50426	5.46177	4.28729	0.000495009	0.0103625	-0.66763
ENSG00000132481.6	protein_coding	TRIM47	2	OTTHUMG00000179916.3	chr17	HAVANA	gene	75874161	75878575	-	0.737732	1.66755	5.5219	4.27622	0.000506981	0.0105686	-0.677981
ENSG00000167508.11	protein_coding	MVD	1	OTTHUMG00000137865.5	chr16	HAVANA	gene	88651935	88663161	-	0.668463	1.58938	5.4164	4.27165	0.000511999	0.0106583	-0.68863
ENSG00000181264.8	protein_coding	TMEM136	2	OTTHUMG00000166142.1	chr11	HAVANA	gene	120325129	120333682	+	0.686608	1.6095	4.55907	4.19729	0.000601206	0.0120443	-0.699579
ENSG00000198832.10	protein_coding	RP3-412A9.11	2	OTTHUMG00000151207.1	chr22	HAVANA	gene	31104772	31120069	-	0.640212	1.55856	7.07597	4.33223	0.000449314	0.0095946	-0.700959
ENSG00000185038.14	protein_coding	MROH2A	1	OTTHUMG00000059037.11	chr2	HAVANA	gene	233775679	233833423	+	1.06028	2.08533	2.38103	3.98789	0.000946363	0.0169334	-0.710139
ENSG00000232759.1	antisense	AC002480.3	2	OTTHUMG00000152530.1	chr7	HAVANA	gene	22563337	22573996	+	-2.67316	0.156783	-1.76582	-3.91463	0.00110957	0.0191192	-0.727687
ENSG00000255595.3	processed_transcript	RP4-809F18.1	2	OTTHUMG00000168466.3	chr12	HAVANA	gene	126191151	126434227	+	1.33045	2.51481	1.99256	3.97695	0.000969108	0.017206	-0.737877
ENSG00000085733.15	protein_coding	CTTN	1	OTTHUMG00000134307.3	chr11	HAVANA	gene	70398404	70436584	+	-0.611274	0.654618	6.55244	-4.29926	0.000482396	0.0101127	-0.744609
ENSG00000128564.6	protein_coding	VGF	2	OTTHUMG00000157109.2	chr7	HAVANA	gene	101162509	101165593	-	-1.46132	0.363162	1.11041	-3.91687	0.00110419	0.0190706	-0.744858
ENSG00000159388.5	protein_coding	BTG2	2	OTTHUMG00000035834.4	chr1	HAVANA	gene	203305491	203309602	+	1.80888	3.50371	1.81315	3.90947	0.00112208	0.0192903	-0.750855
ENSG00000132846.5	protein_coding	ZBED3	2	OTTHUMG00000102131.5	chr5	HAVANA	gene	77072072	77087323	-	0.708074	1.63362	4.0767	4.13316	0.000690686	0.0134571	-0.753441
ENSG00000187634.11	protein_coding	SAMD11	2	OTTHUMG00000040719.10	chr1	HAVANA	gene	923928	944581	+	4.18042	18.1314	0.343264	3.9865	0.00094922	0.0169642	-0.758972
ENSG00000122641.10	protein_coding	INHBA	2	OTTHUMG00000023574.4	chr7	HAVANA	gene	41667168	41705834	-	-2.70751	0.153094	-0.924103	-3.90231	0.00113965	0.0195149	-0.762106
ENSG00000183578.6	protein_coding	TNFAIP8L3	2	OTTHUMG00000172460.2	chr15	HAVANA	gene	51056598	51105276	-	-0.875656	0.545006	2.63012	-4.09887	0.000743933	0.0141252	-0.763047
ENSG00000114423.19	protein_coding	CBLB	1	OTTHUMG00000150654.17	chr3	HAVANA	gene	105655461	105869552	-	0.909161	1.87795	3.90591	4.09719	0.000746638	0.0141406	-0.767483
ENSG00000279191.1	TEC	RP11-803D5.1	2	OTTHUMG00000185277.1	chr2	HAVANA	gene	111321433	111324812	-	-2.26335	0.208287	-0.117667	-3.87063	0.0012209	0.0205622	-0.771945
ENSG00000148680.15	protein_coding	HTR7	2	OTTHUMG00000018732.1	chr10	HAVANA	gene	90740823	90857698	-	-1.05019	0.482904	1.64288	-3.99923	0.000923367	0.0166418	-0.772692
ENSG00000236345.1	antisense	RP11-59D5__B.2	2	OTTHUMG00000014954.1	chr6	HAVANA	gene	63806836	63822642	+	-2.84029	0.139633	-2.41822	-3.92542	0.00108385	0.0187978	-0.773357
ENSG00000259867.5	antisense	RP11-525K10.3	2	OTTHUMG00000177002.1	chr16	HAVANA	gene	80155053	80563135	-	3.62931	12.3746	-2.03225	4.0083	0.000905369	0.0163968	-0.777584
ENSG00000235169.8	protein_coding	SMIM1	1	OTTHUMG00000003505.6	chr1	HAVANA	gene	3772761	3775982	+	1.96584	3.90641	0.756762	3.87108	0.0012197	0.0205622	-0.780596
ENSG00000129354.11	protein_coding	AP1M2	1	OTTHUMG00000180584.2	chr19	HAVANA	gene	10572671	10587315	-	0.782731	1.72038	4.63929	4.16442	0.000645506	0.0127434	-0.789494
ENSG00000113657.12	protein_coding	DPYSL3	2	OTTHUMG00000163437.3	chr5	HAVANA	gene	147390811	147510056	-	0.572055	1.48664	8.05594	4.31976	0.000461541	0.00979952	-0.790307
ENSG00000260401.1	sense_overlapping	RP11-800A3.4	2	OTTHUMG00000167967.1	chr11	HAVANA	gene	73238975	73242335	+	-1.00052	0.499821	1.56291	-3.97668	0.000969678	0.017206	-0.794724
ENSG00000134824.13	protein_coding	FADS2	1	OTTHUMG00000163794.4	chr11	HAVANA	gene	61792980	61867354	+	0.828623	1.77599	3.99175	4.11624	0.000716459	0.0138327	-0.810278
ENSG00000187079.16	protein_coding	TEAD1	2	OTTHUMG00000165878.6	chr11	HAVANA	gene	12674591	12944483	+	-0.672473	0.62743	4.75501	-4.17412	0.000632093	0.0125451	-0.812864
ENSG00000054282.15	protein_coding	SDCCAG8	2	OTTHUMG00000039996.3	chr1	HAVANA	gene	243256034	243500092	+	-0.742025	0.5979	3.48197	-4.07462	0.000784069	0.0146639	-0.822847
ENSG00000166923.10	protein_coding	GREM1	2	OTTHUMG00000129319.4	chr15	HAVANA	gene	32717974	32745107	+	1.72914	3.31529	5.00247	4.11196	0.000723127	0.0139001	-0.835307
ENSG00000162641.18	protein_coding	AKNAD1	2	OTTHUMG00000011231.8	chr1	HAVANA	gene	108815898	108858228	-	-2.91133	0.132923	-1.71067	-3.88333	0.00118765	0.0202077	-0.842847
ENSG00000131378.13	protein_coding	RFTN1	1	OTTHUMG00000156973.4	chr3	HAVANA	gene	16313574	16514026	-	-0.931833	0.524192	2.74374	-3.99248	0.000936978	0.0168122	-0.844324
ENSG00000175471.19	protein_coding	MCTP1	1	OTTHUMG00000162742.8	chr5	HAVANA	gene	94703741	95284575	-	-1.78577	0.290022	0.0822567	-3.85515	0.00126267	0.0211939	-0.845854
ENSG00000132170.20	protein_coding	PPARG	1	OTTHUMG00000129764.11	chr3	HAVANA	gene	12287368	12434356	+	-0.468115	0.722908	6.41094	-4.26051	0.000524465	0.0108722	-0.846099
ENSG00000090013.10	protein_coding	BLVRB	1	OTTHUMG00000182593.3	chr19	HAVANA	gene	40447765	40465840	-	0.54208	1.45607	7.36156	4.26802	0.000516027	0.0107272	-0.852071
ENSG00000213923.11	protein_coding	CSNK1E	1	OTTHUMG00000151135.4	chr22	HAVANA	gene	38290691	38318084	-	-0.604223	0.657826	5.62844	-4.20846	0.000586863	0.0118526	-0.856251
ENSG00000109089.7	protein_coding	CDR2L	2	OTTHUMG00000150435.1	chr17	HAVANA	gene	74987632	75005800	+	-0.648581	0.637907	5.05876	-4.17273	0.000634006	0.0125663	-0.85649
ENSG00000162927.13	protein_coding	PUS10	2	OTTHUMG00000129423.8	chr2	HAVANA	gene	60940222	61018259	-	0.593774	1.50919	4.72826	4.14082	0.000679321	0.0132703	-0.862739
ENSG00000173744.17	protein_coding	AGFG1	1	OTTHUMG00000133186.5	chr2	HAVANA	gene	227472152	227561214	+	-0.604149	0.657859	6.57466	-4.2526	0.000533489	0.0110134	-0.863061
ENSG00000269293.2	antisense	RP1-265C24.9	2	OTTHUMG00000184041.1	chr6	HAVANA	gene	28121795	28137293	-	0.735641	1.66514	4.77698	4.14785	0.000669067	0.0131216	-0.86703
ENSG00000130433.7	protein_coding	CACNG6	2	OTTHUMG00000064907.2	chr19	HAVANA	gene	53992288	54012669	+	-1.22205	0.428674	1.61867	-3.93723	0.00105642	0.0184811	-0.883478
ENSG00000278703.1	lincRNA	RP11-706P11.2	2	OTTHUMG00000186554.1	chr18	HAVANA	gene	57588611	57589091	-	1.17055	2.25097	1.94132	3.87796	0.00120161	0.0203291	-0.885672
ENSG00000115935.17	protein_coding	WIPF1	1	OTTHUMG00000132334.5	chr2	HAVANA	gene	174559572	174682916	-	-0.666541	0.630015	4.03917	-4.09404	0.00075176	0.0142015	-0.890261
ENSG00000047932.13	protein_coding	GOPC	2	OTTHUMG00000015457.2	chr6	HAVANA	gene	117560269	117602542	-	0.810047	1.75327	4.78172	4.12234	0.000707053	0.0136719	-0.89871
ENSG00000106052.13	protein_coding	TAX1BP1	1	OTTHUMG00000023377.9	chr7	HAVANA	gene	27739331	27844564	+	0.725414	1.65337	6.04662	4.21267	0.000581553	0.0117772	-0.901549
ENSG00000223768.2	bidirectional_promoter_lncRNA	LINC00205	1	OTTHUMG00000090403.3	chr21	HAVANA	gene	45288050	45297806	+	0.618029	1.53478	4.12063	4.08217	0.00077135	0.0145164	-0.903727
ENSG00000130702.15	protein_coding	LAMA5	2	OTTHUMG00000032908.6	chr20	HAVANA	gene	62307955	62367312	-	0.706946	1.63234	6.74797	4.23392	0.000555456	0.0113412	-0.911853
ENSG00000163491.16	protein_coding	NEK10	1	OTTHUMG00000130571.14	chr3	HAVANA	gene	27110085	27369460	-	1.98964	3.97139	0.634827	3.7974	0.00143157	0.023193	-0.912608
ENSG00000006757.11	protein_coding	PNPLA4	2	OTTHUMG00000021103.2	chrX	HAVANA	gene	7898247	7927739	-	0.49213	1.40652	7.15163	4.23394	0.000555427	0.0113412	-0.921064
ENSG00000136856.17	protein_coding	SLC2A8	2	OTTHUMG00000020702.5	chr9	HAVANA	gene	127397138	127408424	+	0.615937	1.53255	5.08068	4.14385	0.00067488	0.0132009	-0.922812
ENSG00000102466.15	protein_coding	FGF14	2	OTTHUMG00000017303.9	chr13	HAVANA	gene	101710804	102402457	-	-1.91098	0.265912	-0.177398	-3.79001	0.00145479	0.0235435	-0.942755
ENSG00000158717.10	protein_coding	RNF166	2	OTTHUMG00000137863.7	chr16	HAVANA	gene	88696495	88706421	-	-0.735422	0.600642	4.35841	-4.10007	0.000742	0.0141065	-0.945349
ENSG00000198805.11	protein_coding	PNP	1	OTTHUMG00000029546.4	chr14	HAVANA	gene	20468954	20477094	+	-0.61522	0.65283	5.89748	-4.18609	0.000615938	0.0122899	-0.945563
ENSG00000185033.14	protein_coding	SEMA4B	1	OTTHUMG00000172096.6	chr15	HAVANA	gene	90160604	90229679	+	-0.832272	0.561644	4.99138	-4.15363	0.000660754	0.0129928	-0.951336
ENSG00000185634.11	protein_coding	SHC4	2	OTTHUMG00000131513.2	chr15	HAVANA	gene	48823735	48963444	-	-1.86083	0.275318	0.0251822	-3.78287	0.00147754	0.0237571	-0.956219
ENSG00000125434.10	protein_coding	SLC25A35	2	OTTHUMG00000178480.2	chr17	HAVANA	gene	8287763	8295343	-	1.1044	2.15009	2.16052	3.88171	0.00119183	0.0202326	-0.957232
ENSG00000147010.17	protein_coding	SH3KBP1	2	OTTHUMG00000021227.2	chrX	HAVANA	gene	19533975	19887601	-	-0.468551	0.72269	7.24492	-4.22248	0.000569354	0.0115774	-0.960461
ENSG00000162670.10	protein_coding	BRINP3	2	OTTHUMG00000035533.6	chr1	HAVANA	gene	190097662	190478404	-	1.79233	3.46375	1.17253	3.78676	0.0014651	0.023608	-0.961361
ENSG00000183386.9	protein_coding	FHL3	2	OTTHUMG00000004434.2	chr1	HAVANA	gene	37996770	38005606	-	-0.701046	0.615126	5.09522	-4.13528	0.000687523	0.013413	-0.962166
ENSG00000272702.1	processed_transcript	RP11-44N22.3	2	OTTHUMG00000185982.2	chr2	HAVANA	gene	73113018	73115907	+	1.53244	2.89275	1.67188	3.81269	0.00138478	0.0226814	-0.96938
ENSG00000143127.12	protein_coding	ITGA10	2	OTTHUMG00000013751.3	chr1	HAVANA	gene	145891208	145910189	-	-1.57177	0.336394	0.684708	-3.78796	0.00146128	0.0235973	-0.972077
ENSG00000143603.18	protein_coding	KCNN3	2	OTTHUMG00000037260.3	chr1	HAVANA	gene	154697455	154870280	-	-1.47478	0.359789	1.16595	-3.82619	0.00134472	0.0222453	-0.974432
ENSG00000267123.5	lincRNA	CTD-2357A8.3	2	OTTHUMG00000177747.1	chr17	HAVANA	gene	78617389	78632057	-	-1.37377	0.385881	2.77536	-3.96596	0.000992513	0.0175694	-0.981608
ENSG00000185909.14	protein_coding	KLHDC8B	2	OTTHUMG00000156814.3	chr3	HAVANA	gene	49171611	49176486	+	0.757006	1.68998	4.16983	4.04929	0.000828334	0.0152048	-0.983916
ENSG00000148331.11	protein_coding	ASB6	2	OTTHUMG00000020787.2	chr9	HAVANA	gene	129634604	129642169	-	-0.528542	0.693255	5.74471	-4.16129	0.00064989	0.012813	-0.984879
ENSG00000163697.16	protein_coding	APBB2	2	OTTHUMG00000160416.11	chr4	HAVANA	gene	40810027	41216714	-	-0.655974	0.634647	4.64053	-4.11176	0.00072345	0.0139001	-0.989139
ENSG00000158315.10	protein_coding	RHBDL2	2	OTTHUMG00000000487.2	chr1	HAVANA	gene	38885807	38941799	-	1.63677	3.10969	1.59959	3.77924	0.00148926	0.0238682	-0.989853
ENSG00000100906.10	protein_coding	NFKBIA	1	OTTHUMG00000140220.4	chr14	HAVANA	gene	35401511	35404749	-	0.573971	1.48862	7.98436	4.22395	0.00056754	0.0115563	-0.991097
ENSG00000185420.18	protein_coding	SMYD3	1	OTTHUMG00000040508.7	chr1	HAVANA	gene	245749342	246507312	-	0.663033	1.58341	4.5863	4.07373	0.000785581	0.014673	-0.996492
ENSG00000175376.8	protein_coding	EIF1AD	1	OTTHUMG00000166671.4	chr11	HAVANA	gene	65996545	66002176	-	-0.590011	0.664338	4.93133	-4.11317	0.000721239	0.0139001	-0.997003
ENSG00000097007.17	protein_coding	ABL1	2	OTTHUMG00000020813.3	chr9	HAVANA	gene	130713946	130887675	+	-0.870138	0.547094	5.58803	-4.14819	0.000668576	0.0131216	-1.00155
ENSG00000196083.9	protein_coding	IL1RAP	1	OTTHUMG00000156211.3	chr3	HAVANA	gene	190514051	190659750	+	-1.52098	0.34845	1.87586	-3.83093	0.00133094	0.0220649	-1.00771
ENSG00000123908.11	protein_coding	AGO2	1	OTTHUMG00000164232.6	chr8	HAVANA	gene	140520156	140635619	-	-0.64551	0.639267	5.04014	-4.10244	0.000738203	0.0141063	-1.01345
ENSG00000198042.10	protein_coding	MAK16	2	OTTHUMG00000163957.4	chr8	HAVANA	gene	33484750	33501260	+	-0.908443	0.53276	3.47455	-4.00315	0.000915547	0.0165209	-1.02112
ENSG00000172936.12	protein_coding	MYD88	1	OTTHUMG00000131083.4	chr3	HAVANA	gene	38138478	38143022	+	0.543728	1.45773	5.87816	4.145	0.000673209	0.0131855	-1.03007
ENSG00000151693.10	protein_coding	ASAP2	2	OTTHUMG00000117485.3	chr2	HAVANA	gene	9206765	9405683	+	-1.47802	0.358982	1.71268	-3.81454	0.00137921	0.0226401	-1.03625
ENSG00000197208.5	protein_coding	SLC22A4	2	OTTHUMG00000059648.6	chr5	HAVANA	gene	132294443	132344206	+	-0.649183	0.637641	3.42557	-3.99721	0.000927419	0.0166947	-1.03687
ENSG00000205078.5	protein_coding	SYCE1L	2	OTTHUMG00000176809.1	chr16	HAVANA	gene	77199397	77213215	+	1.12994	2.1885	2.65087	3.882	0.0011911	0.0202326	-1.04633
ENSG00000137210.13	protein_coding	TMEM14B	2	OTTHUMG00000014246.3	chr6	HAVANA	gene	10747759	10852753	+	0.49579	1.41009	8.34502	4.1891	0.000611954	0.0122268	-1.07607
ENSG00000145287.10	protein_coding	PLAC8	1	OTTHUMG00000130294.2	chr4	HAVANA	gene	83090048	83137075	-	2.02787	4.07801	1.74712	3.71037	0.00172984	0.0268184	-1.08493
ENSG00000149289.10	protein_coding	ZC3H12C	1	OTTHUMG00000166572.1	chr11	HAVANA	gene	110093361	110171841	+	-2.62114	0.162539	-0.464386	-3.74174	0.00161579	0.0255934	-1.08731
ENSG00000087494.15	protein_coding	PTHLH	2	OTTHUMG00000169221.3	chr12	HAVANA	gene	27958084	27972705	-	0.526532	1.44046	5.9803	4.13067	0.000694419	0.013477	-1.08977
ENSG00000170485.16	protein_coding	NPAS2	1	OTTHUMG00000130675.7	chr2	HAVANA	gene	100820152	100996829	+	-0.889011	0.539984	3.38321	-3.93636	0.00105841	0.0184943	-1.09068
ENSG00000139410.14	protein_coding	SDSL	2	OTTHUMG00000169551.3	chr12	HAVANA	gene	113422237	113438276	+	0.755107	1.68776	5.20061	4.06708	0.000796988	0.014755	-1.09121
ENSG00000113319.12	protein_coding	RASGRF2	2	OTTHUMG00000119015.5	chr5	HAVANA	gene	80960672	81230156	+	-1.31489	0.401955	2.17902	-3.85418	0.00126534	0.0212148	-1.09536
ENSG00000109205.16	protein_coding	ODAM	2	OTTHUMG00000129406.4	chr4	HAVANA	gene	70196496	70204576	+	3.37465	10.3722	-0.581538	3.81575	0.00137558	0.0226053	-1.09969
ENSG00000132329.10	protein_coding	RAMP1	1	OTTHUMG00000133337.3	chr2	HAVANA	gene	237858893	237912114	+	0.734005	1.66325	4.16914	3.9787	0.000965439	0.0171717	-1.10034
ENSG00000143549.19	protein_coding	TPM3	2	OTTHUMG00000035853.6	chr1	HAVANA	gene	154155304	154194648	-	-0.411492	0.751845	8.2941	-4.17866	0.000625915	0.012439	-1.10298
ENSG00000091592.15	protein_coding	NLRP1	2	OTTHUMG00000132419.7	chr17	HAVANA	gene	5499427	5619424	-	-1.23904	0.423654	3.12434	-3.87955	0.00119744	0.0203047	-1.10973
ENSG00000106330.11	protein_coding	MOSPD3	2	OTTHUMG00000159599.2	chr7	HAVANA	gene	100612102	100615384	+	0.841958	1.79248	4.51725	4.00872	0.000904534	0.0163968	-1.11759
ENSG00000148985.19	protein_coding	PGAP2	1	OTTHUMG00000012238.14	chr11	HAVANA	gene	3797724	3826371	+	0.610671	1.52697	3.67828	3.9516	0.00102394	0.0180186	-1.11849
ENSG00000130303.12	protein_coding	BST2	1	OTTHUMG00000191770.1	chr19	HAVANA	gene	17402939	17405648	-	-1.95267	0.258338	-0.103273	-3.69357	0.0017942	0.0275697	-1.12176
ENSG00000134352.19	protein_coding	IL6ST	1	OTTHUMG00000097043.11	chr5	HAVANA	gene	55935095	55994993	-	-1.64422	0.31992	1.08394	-3.73052	0.0016557	0.025967	-1.12354
ENSG00000164040.16	protein_coding	PGRMC2	2	OTTHUMG00000133342.4	chr4	HAVANA	gene	128269237	128288829	-	0.449105	1.36519	6.90127	4.1316	0.000693024	0.0134732	-1.1246
ENSG00000272468.1	lincRNA	RP1-86C11.7	2	OTTHUMG00000185709.1	chr6	HAVANA	gene	27122657	27123221	-	-2.14726	0.225741	0.639872	-3.67939	0.00185041	0.0282875	-1.14317
ENSG00000204138.12	protein_coding	PHACTR4	2	OTTHUMG00000003541.7	chr1	HAVANA	gene	28369582	28500369	+	0.486329	1.40088	6.33069	4.10454	0.000734845	0.0140602	-1.15306
ENSG00000109339.21	protein_coding	MAPK10	2	OTTHUMG00000130604.48	chr4	HAVANA	gene	85990007	86594625	-	2.59653	6.04832	0.526523	3.68668	0.0018213	0.0279573	-1.15753
ENSG00000198074.9	protein_coding	AKR1B10	2	OTTHUMG00000155356.3	chr7	HAVANA	gene	134527592	134541408	+	-0.590087	0.664303	9.23911	-4.16737	0.000641401	0.012696	-1.16
ENSG00000073331.17	protein_coding	ALPK1	2	OTTHUMG00000132911.2	chr4	HAVANA	gene	112285509	112442620	+	1.03466	2.04863	2.5461	3.8023	0.00141642	0.0230478	-1.1685
ENSG00000144746.6	protein_coding	ARL6IP5	2	OTTHUMG00000158773.1	chr3	HAVANA	gene	69084944	69106066	+	0.630707	1.54832	6.85602	4.11161	0.000723683	0.0139001	-1.17867
ENSG00000101955.14	protein_coding	SRPX	2	OTTHUMG00000021362.1	chrX	HAVANA	gene	38149336	38220924	-	-0.544428	0.685663	7.56907	-4.1314	0.000693321	0.0134732	-1.18426
ENSG00000132467.3	protein_coding	UTP3	2	OTTHUMG00000129911.2	chr4	HAVANA	gene	70688479	70690551	+	-0.587766	0.665373	5.49598	-4.05027	0.000826582	0.0151914	-1.18563
ENSG00000134508.12	protein_coding	CABLES1	2	OTTHUMG00000179186.5	chr18	HAVANA	gene	23134564	23260467	+	0.806146	1.74853	4.28645	3.93256	0.00106718	0.0186038	-1.18788
ENSG00000185813.10	protein_coding	PCYT2	1	OTTHUMG00000177956.4	chr17	HAVANA	gene	81900965	81911464	-	0.590687	1.50596	4.70366	4.00333	0.000915171	0.0165209	-1.19187
ENSG00000262001.1	antisense	RP11-874J12.1	2	OTTHUMG00000177864.1	chr18	HAVANA	gene	3603000	3608336	+	-1.27302	0.413793	1.47437	-3.73021	0.0016568	0.025967	-1.19418
ENSG00000057657.15	protein_coding	PRDM1	1	OTTHUMG00000015299.4	chr6	HAVANA	gene	106086320	106109939	+	-1.55571	0.340162	1.30633	-3.70366	0.0017553	0.0270835	-1.19766
ENSG00000196954.13	protein_coding	CASP4	1	OTTHUMG00000166078.3	chr11	HAVANA	gene	104942866	104969436	-	-0.620698	0.650356	6.67921	-4.10051	0.000741294	0.0141065	-1.19883
ENSG00000168056.15	protein_coding	LTBP3	1	OTTHUMG00000166575.6	chr11	HAVANA	gene	65538805	65558930	-	-0.533393	0.690928	5.87419	-4.0746	0.00078411	0.0146639	-1.2016
ENSG00000183671.12	protein_coding	GPR1	2	OTTHUMG00000132894.3	chr2	HAVANA	gene	206175316	206218047	-	1.49313	2.81499	2.09891	3.67153	0.00188231	0.0286869	-1.21213
ENSG00000163162.8	protein_coding	RNF149	1	OTTHUMG00000130685.2	chr2	HAVANA	gene	101271219	101308701	-	-0.451725	0.731168	5.96906	-4.06669	0.000797671	0.014755	-1.21277
ENSG00000196428.12	protein_coding	TSC22D2	2	OTTHUMG00000159744.2	chr3	HAVANA	gene	150408335	150466431	+	-1.59693	0.330579	2.22844	-3.73487	0.0016401	0.0258299	-1.21527
ENSG00000084112.14	protein_coding	SSH1	2	OTTHUMG00000169371.3	chr12	HAVANA	gene	108778192	108857590	-	-0.735734	0.600513	5.02772	-4.01037	0.000901306	0.0163968	-1.21576
ENSG00000274762.1	antisense	RP11-966I7.4	2	OTTHUMG00000186807.1	chr14	HAVANA	gene	28818741	28819258	+	-2.44902	0.183135	-1.11798	-3.64083	0.00201226	0.0301435	-1.21696
ENSG00000076864.19	protein_coding	RAP1GAP	1	OTTHUMG00000007513.12	chr1	HAVANA	gene	21596215	21669363	-	1.1295	2.18784	2.55813	3.75212	0.0015797	0.025102	-1.21856
ENSG00000099399.5	protein_coding	MAGEB2	2	OTTHUMG00000021319.1	chrX	HAVANA	gene	30215560	30220089	+	-0.663888	0.631175	5.08375	-3.9954	0.00093107	0.0167402	-1.22093
ENSG00000124006.14	protein_coding	OBSL1	2	OTTHUMG00000059157.12	chr2	HAVANA	gene	219550729	219571859	-	1.61466	3.06239	2.02984	3.68517	0.00182729	0.0280136	-1.22636
ENSG00000183520.11	protein_coding	UTP11	2	OTTHUMG00000004435.1	chr1	HAVANA	gene	38009258	38024824	+	-0.514206	0.700178	7.10629	-4.09416	0.000751557	0.0142015	-1.23894
ENSG00000103642.11	protein_coding	LACTB	2	OTTHUMG00000132807.5	chr15	HAVANA	gene	63121800	63142061	+	0.551832	1.46595	6.75692	4.07135	0.000789653	0.0147082	-1.23902
ENSG00000159713.10	protein_coding	TPPP3	2	OTTHUMG00000137516.3	chr16	HAVANA	gene	67389809	67393535	-	0.813234	1.75715	2.65719	3.8166	0.00137306	0.0226053	-1.23974
ENSG00000007255.10	protein_coding	TRAPPC6A	1	OTTHUMG00000181775.1	chr19	HAVANA	gene	45162928	45178237	-	0.816547	1.76119	4.19484	3.89968	0.0011462	0.0195919	-1.24154
ENSG00000132906.17	protein_coding	CASP9	1	OTTHUMG00000002256.7	chr1	HAVANA	gene	15490832	15526534	-	0.697531	1.62173	3.8243	3.90384	0.00113589	0.0195051	-1.24613
ENSG00000171208.9	protein_coding	NETO2	1	OTTHUMG00000133101.4	chr16	HAVANA	gene	47077703	47143997	-	-0.618427	0.651381	5.20389	-4.02187	0.000879094	0.0160772	-1.24842
ENSG00000099953.9	protein_coding	MMP11	2	OTTHUMG00000150742.2	chr22	HAVANA	gene	23768226	23784316	+	2.17842	4.52659	1.00592	3.62656	0.00207565	0.0307837	-1.25162
ENSG00000105829.11	protein_coding	BET1	2	OTTHUMG00000023487.3	chr7	HAVANA	gene	93962762	94004382	-	-0.450522	0.731778	6.61122	-4.06375	0.000802773	0.0148269	-1.26388
ENSG00000127585.11	protein_coding	FBXL16	2	OTTHUMG00000090420.3	chr16	HAVANA	gene	692498	705829	-	2.24109	4.72756	-0.179116	3.63107	0.00205542	0.0305443	-1.26427
ENSG00000153029.14	protein_coding	MR1	2	OTTHUMG00000035175.2	chr1	HAVANA	gene	181033425	181061938	+	0.987081	1.98217	3.37817	3.80363	0.00141231	0.023006	-1.26632
ENSG00000279591.1	TEC	AC002044.1	2	OTTHUMG00000178108.1	chr16	HAVANA	gene	73015047	73016016	-	2.31834	4.98759	0.137046	3.60793	0.00216144	0.0316777	-1.27253
ENSG00000154473.17	protein_coding	BUB3	1	OTTHUMG00000019197.4	chr10	HAVANA	gene	123154277	123170467	+	-0.409361	0.752957	7.43742	-4.08004	0.000774918	0.0145468	-1.28081
ENSG00000239415.1	antisense	AP001469.9	2	OTTHUMG00000090631.1	chr21	HAVANA	gene	46251549	46254133	-	1.10562	2.15191	2.17951	3.72055	0.00169196	0.0262846	-1.28204
ENSG00000115129.13	protein_coding	TP53I3	2	OTTHUMG00000090817.3	chr2	HAVANA	gene	24077433	24085861	-	0.592164	1.50751	5.72065	4.00882	0.000904347	0.0163968	-1.28476
ENSG00000179598.5	protein_coding	PLD6	2	OTTHUMG00000059278.2	chr17	HAVANA	gene	17200995	17206315	-	-0.971618	0.509934	3.10779	-3.80542	0.00140683	0.0229433	-1.28816
ENSG00000116299.16	protein_coding	KIAA1324	2	OTTHUMG00000011725.5	chr1	HAVANA	gene	109113679	109206781	+	0.962174	1.94824	2.91705	3.81639	0.00137368	0.0226053	-1.28827
ENSG00000107984.9	protein_coding	DKK1	2	OTTHUMG00000018247.1	chr10	HAVANA	gene	52314296	52318042	+	-0.782426	0.581388	4.63313	-3.92431	0.00108649	0.0188084	-1.29648
ENSG00000165732.12	protein_coding	DDX21	2	OTTHUMG00000018366.1	chr10	HAVANA	gene	68956128	68985073	+	-0.469717	0.722106	8.01696	-4.0807	0.0007738	0.0145441	-1.30113
ENSG00000167941.2	protein_coding	SOST	2	OTTHUMG00000180888.3	chr17	HAVANA	gene	43753731	43758788	-	1.12696	2.18398	3.00704	3.72717	0.0016678	0.0260573	-1.30878
ENSG00000116584.17	protein_coding	ARHGEF2	2	OTTHUMG00000017464.8	chr1	HAVANA	gene	155946851	156007070	-	-0.653985	0.635523	4.45867	-3.91544	0.00110762	0.0191078	-1.31031
ENSG00000104635.13	protein_coding	SLC39A14	1	OTTHUMG00000097791.6	chr8	HAVANA	gene	22367249	22434129	+	-0.578169	0.669813	7.07699	-4.05674	0.000815062	0.0150167	-1.31096
ENSG00000135636.13	protein_coding	DYSF	2	OTTHUMG00000129757.8	chr2	HAVANA	gene	71453722	71686768	+	2.92003	7.5686	-0.191946	3.62586	0.0020788	0.0307997	-1.31271
ENSG00000130707.17	protein_coding	ASS1	2	OTTHUMG00000020806.4	chr9	HAVANA	gene	130444929	130501274	+	0.813839	1.75788	4.21662	3.82263	0.00135517	0.0223934	-1.31788
ENSG00000243819.4	lincRNA	RP11-791G15.1	2	OTTHUMG00000185349.1	chr2	HAVANA	gene	10690344	10692099	+	1.3588	2.56473	1.14954	3.62532	0.00208125	0.0308054	-1.32198
ENSG00000135148.11	protein_coding	TRAFD1	1	OTTHUMG00000169640.4	chr12	HAVANA	gene	112125501	112153609	+	0.801767	1.74323	4.55211	3.91218	0.00111549	0.019199	-1.32513
ENSG00000175611.11	lincRNA	LINC00476	2	OTTHUMG00000020286.2	chr9	HAVANA	gene	95759231	95875977	-	0.848857	1.80107	3.20414	3.80539	0.00140692	0.0229433	-1.33069
ENSG00000102007.10	protein_coding	PLP2	2	OTTHUMG00000021513.1	chrX	HAVANA	gene	49171926	49175239	+	-0.613897	0.653429	7.78702	-4.06656	0.000797891	0.014755	-1.33168
ENSG00000155111.14	protein_coding	CDK19	2	OTTHUMG00000015365.6	chr6	HAVANA	gene	110609978	110815958	-	0.579111	1.49393	4.12481	3.90247	0.00113928	0.0195149	-1.33473
ENSG00000127125.8	protein_coding	PPCS	2	OTTHUMG00000007332.4	chr1	HAVANA	gene	42456117	42473385	+	0.503214	1.41737	6.64082	4.02467	0.000873778	0.0159996	-1.33942
ENSG00000132840.9	protein_coding	BHMT2	1	OTTHUMG00000108158.4	chr5	HAVANA	gene	79069717	79089466	+	0.488324	1.40281	6.19243	4.01332	0.000895558	0.0163382	-1.34149
ENSG00000166582.9	protein_coding	CENPV	2	OTTHUMG00000059345.4	chr17	HAVANA	gene	16342534	16353656	-	-0.594979	0.662054	4.72241	-3.95549	0.00101533	0.0178883	-1.34455
ENSG00000198589.10	protein_coding	LRBA	1	OTTHUMG00000161443.1	chr4	HAVANA	gene	150264531	151015727	-	0.65816	1.57807	4.29568	3.87862	0.00119986	0.0203227	-1.35001
ENSG00000172183.14	protein_coding	ISG20	1	OTTHUMG00000148679.3	chr15	HAVANA	gene	88636153	88656483	+	-0.965215	0.512202	2.40926	-3.72029	0.00169294	0.0262846	-1.35128
ENSG00000171055.14	protein_coding	FEZ2	2	OTTHUMG00000152148.4	chr2	HAVANA	gene	36531805	36646087	-	-0.540059	0.687743	5.93453	-3.99231	0.000937331	0.0168122	-1.35144
ENSG00000204438.10	protein_coding	GPANK1	2	OTTHUMG00000031174.10	chr6	HAVANA	gene	31661229	31666283	-	-0.729958	0.602922	4.92613	-3.94918	0.00102933	0.0180776	-1.35577
ENSG00000270190.1	lincRNA	RP11-803D5.4	2	OTTHUMG00000185276.1	chr2	HAVANA	gene	111266868	111267473	-	-2.65774	0.158467	-1.4786	-3.58241	0.0022847	0.0330295	-1.3583
ENSG00000134533.6	protein_coding	RERG	1	OTTHUMG00000168745.2	chr12	HAVANA	gene	15107783	15348675	-	1.62646	3.08754	2.55467	3.70405	0.00175378	0.0270835	-1.36284
ENSG00000154451.14	protein_coding	GBP5	2	OTTHUMG00000010006.3	chr1	HAVANA	gene	89258950	89272804	-	-1.54719	0.342175	0.123153	-3.58284	0.00228258	0.0330295	-1.36744
ENSG00000113721.13	protein_coding	PDGFRB	1	OTTHUMG00000130053.4	chr5	HAVANA	gene	150113837	150155872	-	1.23757	2.358	2.03274	3.65175	0.00196504	0.0296447	-1.37098
ENSG00000116396.14	protein_coding	KCNC4	1	OTTHUMG00000011037.11	chr1	HAVANA	gene	110211343	110283100	+	-1.25856	0.41796	1.63692	-3.64999	0.00197256	0.029728	-1.37742
ENSG00000135046.13	protein_coding	ANXA1	2	OTTHUMG00000020016.2	chr9	HAVANA	gene	73151757	73170393	+	-2.44061	0.184206	4.77599	-3.96728	0.000989681	0.0175401	-1.38092
ENSG00000171793.13	protein_coding	CTPS1	2	OTTHUMG00000005712.2	chr1	HAVANA	gene	40979335	41012565	+	-0.546386	0.684733	6.394	-4.00503	0.000911811	0.0164934	-1.38698
ENSG00000122591.11	protein_coding	FAM126A	1	OTTHUMG00000128435.3	chr7	HAVANA	gene	22889371	23014130	-	-0.699486	0.615791	3.67946	-3.86102	0.00124666	0.0209487	-1.39253
ENSG00000151445.15	protein_coding	VIPAS39	2	OTTHUMG00000171538.3	chr14	HAVANA	gene	77426675	77457952	-	0.655345	1.57499	3.81382	3.83185	0.00132827	0.0220467	-1.39992
ENSG00000123080.10	protein_coding	CDKN2C	2	OTTHUMG00000008046.2	chr1	HAVANA	gene	50960745	50974633	+	0.612497	1.5289	6.24205	3.98845	0.000945216	0.0169332	-1.40688
ENSG00000106302.9	protein_coding	HYAL4	2	OTTHUMG00000157349.3	chr7	HAVANA	gene	123828983	123877478	+	-1.8381	0.27969	-0.569879	-3.54516	0.00247733	0.0351663	-1.4134
ENSG00000100918.12	protein_coding	REC8	2	OTTHUMG00000171916.7	chr14	HAVANA	gene	24171853	24180257	+	0.535259	1.4492	5.19717	3.92659	0.00108112	0.0187978	-1.41436
ENSG00000124104.18	protein_coding	SNX21	2	OTTHUMG00000032624.2	chr20	HAVANA	gene	45833810	45843275	+	0.829074	1.77654	3.23426	3.78051	0.00148513	0.0238533	-1.41524
ENSG00000131871.14	protein_coding	VIMP	2	OTTHUMG00000166441.5	chr15	HAVANA	gene	101270817	101277500	-	-0.457383	0.728306	7.16065	-4.01038	0.000901283	0.0163968	-1.41579
ENSG00000231066.3	processed_pseudogene	U70984.1	1	OTTHUMG00000021167.3	chrX	HAVANA	gene	14834476	14835319	-	-3.06075	0.119846	-0.945119	-3.54405	0.00248331	0.0352176	-1.41699
ENSG00000133678.13	protein_coding	TMEM254	2	OTTHUMG00000018602.1	chr10	HAVANA	gene	80078646	80092557	+	0.569083	1.48358	4.50338	3.86538	0.0012349	0.0207745	-1.41718
ENSG00000144451.18	protein_coding	SPAG16	2	OTTHUMG00000133015.8	chr2	HAVANA	gene	213284379	214410501	+	0.639329	1.5576	5.1806	3.89865	0.00114876	0.0196051	-1.42414
ENSG00000138193.15	protein_coding	PLCE1	2	OTTHUMG00000018789.3	chr10	HAVANA	gene	94030812	94332823	+	0.782447	1.72005	3.68241	3.7796	0.00148808	0.0238682	-1.42726
ENSG00000130958.11	protein_coding	SLC35D2	2	OTTHUMG00000020293.1	chr9	HAVANA	gene	96320706	96383710	-	0.721394	1.64877	4.98604	3.90202	0.00114039	0.0195149	-1.42871
ENSG00000130818.11	protein_coding	ZNF426	1	OTTHUMG00000180132.3	chr19	HAVANA	gene	9523224	9538645	-	0.70232	1.62712	3.90405	3.80051	0.00142193	0.0231121	-1.43067
ENSG00000114270.17	protein_coding	COL7A1	2	OTTHUMG00000133541.3	chr3	HAVANA	gene	48564073	48595267	-	-0.526186	0.694388	6.53715	-3.98548	0.000951329	0.0169815	-1.43684
ENSG00000010438.16	protein_coding	PRSS3	2	OTTHUMG00000019798.5	chr9	HAVANA	gene	33750466	33799231	+	-0.696218	0.617188	5.71946	-3.96031	0.00100477	0.0177441	-1.44292
ENSG00000135218.17	protein_coding	CD36	1	OTTHUMG00000155383.21	chr7	HAVANA	gene	80369575	80679277	+	1.32045	2.49744	2.00546	3.58678	0.00226311	0.0328769	-1.45063
ENSG00000105516.10	protein_coding	DBP	1	OTTHUMG00000183319.1	chr19	HAVANA	gene	48630030	48637438	-	1.41229	2.66159	2.48485	3.63654	0.00203108	0.0303035	-1.45605
ENSG00000125247.15	protein_coding	TMTC4	1	OTTHUMG00000017289.6	chr13	HAVANA	gene	100603927	100675093	-	0.7932	1.73291	3.1147	3.74236	0.00161359	0.0255857	-1.45646
ENSG00000109854.13	protein_coding	HTATIP2	2	OTTHUMG00000166015.6	chr11	HAVANA	gene	20363685	20383783	+	0.40917	1.32792	8.26988	4.00864	0.000904699	0.0163968	-1.46174
ENSG00000135269.17	protein_coding	TES	2	OTTHUMG00000023092.9	chr7	HAVANA	gene	116210493	116258783	+	0.465989	1.38126	6.6662	3.96464	0.000995367	0.017599	-1.46802
ENSG00000066926.10	protein_coding	FECH	1	OTTHUMG00000132740.3	chr18	HAVANA	gene	57548283	57586772	-	0.513106	1.42712	6.44754	3.95678	0.0010125	0.0178595	-1.47591
ENSG00000165424.6	protein_coding	ZCCHC24	2	OTTHUMG00000018561.1	chr10	HAVANA	gene	79382325	79445627	-	-0.779701	0.582488	4.16057	-3.83876	0.00130846	0.021794	-1.48182
ENSG00000181192.11	protein_coding	DHTKD1	2	OTTHUMG00000017677.3	chr10	HAVANA	gene	12068972	12123225	+	0.544381	1.45839	5.23689	3.89431	0.00115965	0.0197538	-1.4833
ENSG00000162078.11	protein_coding	ZG16B	1	OTTHUMG00000128933.3	chr16	HAVANA	gene	2830169	2839585	+	-1.93	0.262429	-0.671055	-3.49569	0.0027583	0.0381393	-1.48644
ENSG00000132386.10	protein_coding	SERPINF1	1	OTTHUMG00000090571.6	chr17	HAVANA	gene	1761959	1777574	+	1.24398	2.36851	1.81801	3.56842	0.00235522	0.0337544	-1.48711
ENSG00000137494.13	protein_coding	ANKRD42	1	OTTHUMG00000167075.1	chr11	HAVANA	gene	83193739	83260694	+	-0.645413	0.63931	3.75442	-3.78941	0.00145668	0.0235485	-1.49121
ENSG00000160211.16	protein_coding	G6PD	1	OTTHUMG00000024237.9	chrX	HAVANA	gene	154531391	154547572	-	0.440561	1.35713	9.45882	4.01584	0.000890664	0.0162688	-1.49279
ENSG00000115267.5	protein_coding	IFIH1	2	OTTHUMG00000132055.3	chr2	HAVANA	gene	162267079	162318703	-	0.969873	1.95867	3.48765	3.73027	0.0016566	0.025967	-1.49301
ENSG00000117877.10	protein_coding	CD3EAP	2	OTTHUMG00000182120.2	chr19	HAVANA	gene	45406209	45410766	+	-0.687011	0.621139	3.6389	-3.76371	0.00154039	0.0245819	-1.49312
ENSG00000232723.1	processed_pseudogene	AC013399.3	1	OTTHUMG00000155142.1	chr2	HAVANA	gene	121309995	121310412	+	-2.31438	0.201049	-1.7461	-3.51122	0.00266683	0.0373231	-1.49363
ENSG00000180616.8	protein_coding	SSTR2	1	OTTHUMG00000178343.3	chr17	HAVANA	gene	73165012	73176633	+	2.9963	7.97951	0.0604284	3.50947	0.00267697	0.0373949	-1.49484
ENSG00000115525.17	protein_coding	ST3GAL5	1	OTTHUMG00000130171.16	chr2	HAVANA	gene	85837120	85905199	-	-0.618205	0.651481	4.45631	-3.87114	0.00121953	0.0205622	-1.49538
ENSG00000109814.11	protein_coding	UGDH	1	OTTHUMG00000099371.5	chr4	HAVANA	gene	39498755	39528311	-	0.437695	1.35444	7.62021	3.98158	0.000959416	0.0170849	-1.50196
ENSG00000169047.5	protein_coding	IRS1	2	OTTHUMG00000133179.3	chr2	HAVANA	gene	226731317	226799759	-	-1.08997	0.469771	2.59563	-3.65703	0.0019426	0.0293931	-1.50215
ENSG00000100422.13	protein_coding	CERK	2	OTTHUMG00000150395.2	chr22	HAVANA	gene	46684411	46738261	-	-0.680756	0.623838	5.66296	-3.9251	0.00108461	0.0187978	-1.50338
ENSG00000146021.14	protein_coding	KLHL3	1	OTTHUMG00000129155.13	chr5	HAVANA	gene	137617500	137736090	-	1.6793	3.20273	1.07271	3.51022	0.00267263	0.0373692	-1.5051
ENSG00000081721.11	protein_coding	DUSP12	2	OTTHUMG00000034540.2	chr1	HAVANA	gene	161749758	161757238	+	-0.537452	0.688987	6.33899	-3.93736	0.0010561	0.0184811	-1.5137
ENSG00000099625.12	protein_coding	CBARP	2	OTTHUMG00000180141.5	chr19	HAVANA	gene	1228287	1238027	-	-2.55417	0.170262	-1.33243	-3.50426	0.00270748	0.0376363	-1.52645
ENSG00000272172.1	antisense	RP13-582O9.7	2	OTTHUMG00000185627.1	chr8	HAVANA	gene	143290399	143290621	-	1.52203	2.87195	1.01721	3.48924	0.00279723	0.0384974	-1.53156
ENSG00000119801.12	protein_coding	YPEL5	2	OTTHUMG00000097839.4	chr2	HAVANA	gene	30146941	30160533	+	1.00361	2.00502	3.77659	3.73425	0.0016423	0.0258299	-1.53224
ENSG00000137819.13	protein_coding	PAQR5	2	OTTHUMG00000133322.5	chr15	HAVANA	gene	69298947	69407780	+	-0.910264	0.532088	3.05623	-3.74016	0.00162135	0.0256541	-1.53461
ENSG00000155265.10	protein_coding	GOLGA7B	2	OTTHUMG00000018869.2	chr10	HAVANA	gene	97850239	97871580	+	-2.27876	0.206074	-0.603229	-3.47102	0.00291003	0.0396109	-1.54247
ENSG00000197548.12	protein_coding	ATG7	1	OTTHUMG00000129740.21	chr3	HAVANA	gene	11272309	11557665	+	-0.70581	0.613098	3.7622	-3.7647	0.0015371	0.0245819	-1.55184
ENSG00000006652.13	protein_coding	IFRD1	1	OTTHUMG00000155124.7	chr7	HAVANA	gene	112422968	112481017	+	-0.474854	0.719539	6.69437	-3.92323	0.00108903	0.0188306	-1.55522
ENSG00000166025.17	protein_coding	AMOTL1	1	OTTHUMG00000167828.4	chr11	HAVANA	gene	94706431	94876753	+	-0.900683	0.535633	3.60134	-3.75712	0.00156261	0.0249099	-1.55883
ENSG00000205791.3	lincRNA	RP11-757G14.4	2	OTTHUMG00000187482.1	chr12	HAVANA	gene	12355406	12357067	-	1.79771	3.47669	0.564405	3.46389	0.00295543	0.039901	-1.56289
ENSG00000268621.5	lincRNA	AC006262.5	2	OTTHUMG00000182496.1	chr19	HAVANA	gene	46189166	46203083	-	3.87516	14.6737	-0.00286541	3.50273	0.00271644	0.0376988	-1.56848
ENSG00000279425.1	TEC	CTD-2017D11.2	2	OTTHUMG00000183393.1	chr19	HAVANA	gene	24078481	24080669	+	2.02519	4.07046	0.643471	3.46046	0.00297747	0.0400896	-1.56872
ENSG00000057704.12	protein_coding	TMCC3	1	OTTHUMG00000170225.3	chr12	HAVANA	gene	94567124	94650562	-	-1.01751	0.493969	1.82784	-3.58754	0.00225939	0.0328548	-1.56984
ENSG00000165476.13	protein_coding	REEP3	2	OTTHUMG00000018318.5	chr10	HAVANA	gene	63521363	63625123	+	-0.595549	0.661793	6.71088	-3.92918	0.00107504	0.018719	-1.57318
ENSG00000151062.14	protein_coding	CACNA2D4	2	OTTHUMG00000168111.5	chr12	HAVANA	gene	1791957	1918836	-	-1.87533	0.272565	0.128724	-3.45706	0.00299955	0.0402117	-1.57648
ENSG00000117298.14	protein_coding	ECE1	1	OTTHUMG00000002625.3	chr1	HAVANA	gene	21217247	21345504	-	-0.600871	0.659356	6.68233	-3.92602	0.00108244	0.0187978	-1.57862
ENSG00000214944.9	protein_coding	ARHGEF28	1	OTTHUMG00000162454.3	chr5	HAVANA	gene	73626158	73941993	+	-0.664282	0.631003	3.55456	-3.72291	0.00168333	0.0262449	-1.58323
ENSG00000164520.11	protein_coding	RAET1E	2	OTTHUMG00000015796.3	chr6	HAVANA	gene	149883375	149898102	-	-2.47466	0.179909	-1.09023	-3.45657	0.00300273	0.0402117	-1.58345
ENSG00000154447.14	protein_coding	SH3RF1	2	OTTHUMG00000161010.5	chr4	HAVANA	gene	169094256	169271105	-	-1.10867	0.46372	2.19253	-3.64795	0.00198135	0.0298303	-1.58348
ENSG00000144642.21	protein_coding	RBMS3	2	OTTHUMG00000155699.8	chr3	HAVANA	gene	28574791	30010391	+	1.68651	3.21876	1.67476	3.49243	0.0027779	0.0383021	-1.58966
ENSG00000275552.1	antisense	CH17-302M23.1	2	OTTHUMG00000188279.1	chr14	HAVANA	gene	22595808	22598946	-	3.08396	8.47936	-0.708608	3.49419	0.0027673	0.038215	-1.60204
ENSG00000143061.17	protein_coding	IGSF3	2	OTTHUMG00000022751.4	chr1	HAVANA	gene	116574399	116667755	-	1.88664	3.69774	0.269835	3.43004	0.00318058	0.0415846	-1.60613
ENSG00000181885.18	protein_coding	CLDN7	1	OTTHUMG00000178005.4	chr17	HAVANA	gene	7259903	7263983	-	1.75229	3.36893	0.631154	3.43028	0.00317892	0.0415846	-1.60993
ENSG00000053372.4	protein_coding	MRTO4	2	OTTHUMG00000002496.2	chr1	HAVANA	gene	19251539	19260128	+	-0.423595	0.745564	7.83012	-3.93482	0.00106195	0.0185344	-1.61111
ENSG00000279822.1	TEC	RP11-541M12.6	2	OTTHUMG00000176172.1	chr10	HAVANA	gene	48443836	48445820	-	-1.55982	0.339193	0.253948	-3.438	0.00312614	0.0412113	-1.61962
ENSG00000196839.12	protein_coding	ADA	1	OTTHUMG00000033081.3	chr20	HAVANA	gene	44619522	44652233	-	0.567948	1.48241	5.38839	3.83715	0.00131306	0.0218428	-1.62262
ENSG00000006747.14	protein_coding	SCIN	1	OTTHUMG00000152385.4	chr7	HAVANA	gene	12570577	12660179	+	3.05738	8.3246	0.479012	3.44176	0.00310075	0.041045	-1.62699
ENSG00000198680.4	protein_coding	TUSC1	2	OTTHUMG00000159591.1	chr9	HAVANA	gene	25676389	25678440	-	0.624382	1.54155	4.68838	3.79962	0.0014247	0.0231122	-1.63265
ENSG00000164695.4	protein_coding	CHMP4C	2	OTTHUMG00000164726.1	chr8	HAVANA	gene	81732434	81759515	+	1.17465	2.25738	2.2525	3.51234	0.00266035	0.0372674	-1.63796
ENSG00000188015.9	protein_coding	S100A3	2	OTTHUMG00000013550.2	chr1	HAVANA	gene	153547329	153549372	-	0.668152	1.58904	5.36924	3.84614	0.00128765	0.0215403	-1.63863
ENSG00000189283.9	protein_coding	FHIT	2	OTTHUMG00000158591.3	chr3	HAVANA	gene	59749310	61251459	-	1.54467	2.91738	0.589941	3.44567	0.00307456	0.0408658	-1.64448
ENSG00000186529.15	protein_coding	CYP4F3	2	OTTHUMG00000182374.5	chr19	HAVANA	gene	15640897	15662825	+	3.03434	8.19271	-0.591142	3.44264	0.00309487	0.0410192	-1.64985
ENSG00000124116.18	protein_coding	WFDC3	1	OTTHUMG00000032614.4	chr20	HAVANA	gene	45747944	45791932	-	1.30861	2.47702	0.899765	3.46982	0.00291763	0.0396419	-1.65303
ENSG00000010319.6	protein_coding	SEMA3G	2	OTTHUMG00000158570.2	chr3	HAVANA	gene	52433053	52445085	-	2.72164	6.59621	-0.71849	3.46464	0.00295062	0.039901	-1.66162
ENSG00000188488.13	protein_coding	SERPINA5	2	OTTHUMG00000170860.4	chr14	HAVANA	gene	94561442	94593120	+	3.72847	13.255	-0.912939	3.45676	0.00300146	0.0402117	-1.66819
ENSG00000234690.6	lincRNA	AC073283.4	1	OTTHUMG00000151698.6	chr2	HAVANA	gene	47192405	47345074	-	1.57805	2.98566	1.05675	3.43055	0.00317707	0.0415846	-1.66836
ENSG00000121691.4	protein_coding	CAT	2	OTTHUMG00000044353.2	chr11	HAVANA	gene	34438925	34472062	+	0.562124	1.47644	7.47333	3.89832	0.0011496	0.0196051	-1.67451
ENSG00000247271.6	antisense	CTD-2003C8.1	1	OTTHUMG00000165888.1	chr11	HAVANA	gene	10858259	10906802	+	1.08222	2.11729	2.73211	3.60806	0.00216085	0.0316777	-1.67776
ENSG00000203797.9	protein_coding	DDO	2	OTTHUMG00000015360.3	chr6	HAVANA	gene	110391771	110415562	-	3.18354	9.08534	-0.272946	3.44507	0.00307857	0.0408658	-1.6805
ENSG00000129991.12	protein_coding	TNNI3	2	OTTHUMG00000180589.5	chr19	HAVANA	gene	55151767	55157773	-	1.44057	2.71428	1.60942	3.46194	0.00296793	0.0399973	-1.68383
ENSG00000196968.10	protein_coding	FUT11	2	OTTHUMG00000018483.2	chr10	HAVANA	gene	73772291	73780251	+	-0.590261	0.664223	4.07164	-3.7341	0.00164286	0.0258299	-1.68731
ENSG00000162755.13	protein_coding	KLHDC9	2	OTTHUMG00000031479.2	chr1	HAVANA	gene	161098361	161100346	+	1.31915	2.4952	1.85373	3.47348	0.00289456	0.0394725	-1.6996
ENSG00000272156.1	lincRNA	RP11-477N3.1	2	OTTHUMG00000185585.1	chr2	HAVANA	gene	54082554	54085066	+	3.1121	8.6464	-1.11812	3.44923	0.00305094	0.0406747	-1.70261
ENSG00000230630.4	antisense	DNM3OS	2	OTTHUMG00000040855.3	chr1	HAVANA	gene	172136531	172144794	-	2.10988	4.31656	0.741189	3.39139	0.00345856	0.0441351	-1.70338
ENSG00000166922.8	protein_coding	SCG5	1	OTTHUMG00000159447.2	chr15	HAVANA	gene	32641676	32697098	+	-1.46588	0.362015	1.33491	-3.4939	0.00276901	0.038215	-1.70851
ENSG00000269927.1	lincRNA	RP6-91H8.3	2	OTTHUMG00000172968.1	chr14	HAVANA	gene	71141125	71143253	-	-2.23466	0.212472	-0.475972	-3.37434	0.0035887	0.045209	-1.70903
ENSG00000269416.5	lincRNA	CTB-175P5.4	2	OTTHUMG00000183272.1	chr19	HAVANA	gene	23399233	23416075	-	1.48664	2.80235	0.456806	3.39267	0.00344893	0.0440499	-1.71059
ENSG00000225648.5	transcribed_unprocessed_pseudogene	SBDSP	2	OTTHUMG00000157063.3	chr7	HAVANA	gene	72829425	72836701	+	-0.728621	0.60348	2.92426	-3.61398	0.00213321	0.0313874	-1.71197
ENSG00000113811.10	protein_coding	RP11-884K10.5	2	OTTHUMG00000158656.1	chr3	HAVANA	gene	53884410	53891988	-	-0.444552	0.734813	7.17588	-3.87636	0.00120579	0.0203768	-1.71412
ENSG00000230257.2	protein_coding	NFE4	2	OTTHUMG00000157208.3	chr7	HAVANA	gene	102973437	102988856	+	-0.44293	0.735639	5.75334	-3.81397	0.00138092	0.0226432	-1.71523
ENSG00000130755.12	protein_coding	GMFG	2	OTTHUMG00000182811.2	chr19	HAVANA	gene	39328353	39342372	-	-1.32883	0.398092	0.924263	-3.43655	0.00313599	0.041255	-1.71913
ENSG00000114948.12	protein_coding	ADAM23	2	OTTHUMG00000132919.4	chr2	HAVANA	gene	206443539	206621130	+	0.634253	1.55213	4.85324	3.75212	0.00157972	0.025102	-1.72646
ENSG00000013374.16	protein_coding	NUB1	2	OTTHUMG00000157365.5	chr7	HAVANA	gene	151341699	151378449	+	0.449831	1.36588	6.62449	3.84634	0.0012871	0.0215403	-1.72687
ENSG00000171155.7	protein_coding	C1GALT1C1	2	OTTHUMG00000022305.1	chrX	HAVANA	gene	120625793	120630150	-	-0.671741	0.627749	3.91947	-3.7056	0.00174788	0.0270251	-1.72846
ENSG00000188921.13	protein_coding	HACD4	2	OTTHUMG00000021016.4	chr9	HAVANA	gene	20999515	21031636	-	0.787537	1.72612	3.95541	3.66298	0.00191764	0.0291615	-1.7287
ENSG00000065413.19	protein_coding	ANKRD44	1	OTTHUMG00000154411.11	chr2	HAVANA	gene	196967017	197311173	-	-1.17124	0.444039	1.44675	-3.4754	0.00288253	0.0394379	-1.73277
ENSG00000153714.5	protein_coding	LURAP1L	2	OTTHUMG00000019557.1	chr9	HAVANA	gene	12775021	12822131	+	0.72299	1.6506	4.53352	3.71009	0.00173091	0.0268184	-1.73408
ENSG00000111331.12	protein_coding	OAS3	2	OTTHUMG00000169795.2	chr12	HAVANA	gene	112938352	112973249	+	0.718106	1.64502	4.25434	3.69484	0.00178928	0.0275509	-1.73981
ENSG00000246985.7	processed_transcript	RP11-887P2.1	2	OTTHUMG00000170159.1	chr12	HAVANA	gene	93542463	93571768	-	2.46332	5.51485	-0.191331	3.37416	0.0035901	0.045209	-1.74025
ENSG00000105963.13	protein_coding	ADAP1	1	OTTHUMG00000023380.13	chr7	HAVANA	gene	897901	955407	-	0.753336	1.68569	3.85456	3.63477	0.00203895	0.0303602	-1.74194
ENSG00000165181.16	protein_coding	C9orf84	1	OTTHUMG00000020495.5	chr9	HAVANA	gene	111686173	111795008	-	3.40084	10.5622	-0.514811	3.40378	0.00336691	0.0432062	-1.74291
ENSG00000114796.15	protein_coding	KLHL24	2	OTTHUMG00000156911.5	chr3	HAVANA	gene	183635568	183684477	+	0.851938	1.80492	2.79332	3.54028	0.00250371	0.0354059	-1.74385
ENSG00000115107.19	protein_coding	STEAP3	2	OTTHUMG00000131402.2	chr2	HAVANA	gene	119223831	119265652	+	0.78528	1.72343	5.63416	3.8086	0.00139714	0.0228338	-1.74619
ENSG00000160209.18	protein_coding	PDXK	2	OTTHUMG00000086870.4	chr21	HAVANA	gene	43719094	43762307	+	-0.499378	0.707412	5.9707	-3.82019	0.00136238	0.0224875	-1.75104
ENSG00000013588.7	protein_coding	GPRC5A	2	OTTHUMG00000168710.2	chr12	HAVANA	gene	12890782	12917937	+	-0.51745	0.698605	5.32842	-3.76405	0.00153926	0.0245819	-1.75528
ENSG00000054967.12	protein_coding	RELT	2	OTTHUMG00000167973.3	chr11	HAVANA	gene	73376264	73397474	+	-0.930142	0.524807	2.89801	-3.58384	0.00227762	0.0330233	-1.76076
ENSG00000085831.15	protein_coding	TTC39A	2	OTTHUMG00000008193.5	chr1	HAVANA	gene	51287258	51345116	-	1.02525	2.03531	2.78037	3.5333	0.00254196	0.0358448	-1.77006
ENSG00000076356.6	protein_coding	PLXNA2	1	OTTHUMG00000036564.6	chr1	HAVANA	gene	208022242	208244320	-	-1.63234	0.322564	1.1389	-3.39016	0.00346777	0.0441394	-1.77234
ENSG00000214021.15	protein_coding	TTLL3	1	OTTHUMG00000128439.13	chr3	HAVANA	gene	9808086	9855138	+	1.73597	3.33104	1.31809	3.37951	0.00354872	0.0449776	-1.77769
ENSG00000167700.8	protein_coding	MFSD3	2	OTTHUMG00000165177.2	chr8	HAVANA	gene	144509074	144511213	+	0.609907	1.52616	4.69028	3.70315	0.00175721	0.0270851	-1.78243
ENSG00000166887.15	protein_coding	VPS39	2	OTTHUMG00000130467.4	chr15	HAVANA	gene	42158701	42208316	-	0.59728	1.51286	5.98909	3.7852	0.00147005	0.0236621	-1.78451
ENSG00000103490.13	protein_coding	PYCARD	2	OTTHUMG00000176753.30	chr16	HAVANA	gene	31201485	31203450	-	1.93418	3.82162	0.641914	3.35169	0.00376905	0.0468148	-1.78831
ENSG00000260549.1	transcribed_unprocessed_pseudogene	MT1L	2	OTTHUMG00000176212.2	chr16	HAVANA	gene	56617476	56618818	+	-0.469395	0.722267	6.27848	-3.83441	0.00132091	0.0219489	-1.78858
ENSG00000267934.1	antisense	CTB-176F20.3	2	OTTHUMG00000183269.1	chr19	HAVANA	gene	23323968	23329101	+	3.20583	9.2268	-0.277679	3.35348	0.00375445	0.0466723	-1.79613
ENSG00000070444.14	protein_coding	MNT	1	OTTHUMG00000090603.7	chr17	HAVANA	gene	2384060	2401118	-	0.654143	1.57368	4.83981	3.72867	0.00166238	0.0259998	-1.80165
ENSG00000227051.6	protein_coding	C14orf132	1	OTTHUMG00000171393.3	chr14	HAVANA	gene	96039324	96093889	+	1.09354	2.13397	1.65636	3.42794	0.00319507	0.041665	-1.80393
ENSG00000213626.11	protein_coding	LBH	1	OTTHUMG00000152051.3	chr2	HAVANA	gene	30231531	30323730	+	1.12283	2.17773	3.86361	3.61889	0.00211056	0.0311464	-1.80403
ENSG00000119630.13	protein_coding	PGF	2	OTTHUMG00000171496.3	chr14	HAVANA	gene	74941834	74955784	-	-2.28053	0.205822	-0.16689	-3.3394	0.00387064	0.0476399	-1.80664
ENSG00000146376.10	protein_coding	ARHGAP18	2	OTTHUMG00000015547.2	chr6	HAVANA	gene	129576132	129710225	-	-0.773344	0.58506	4.20733	-3.67409	0.00187187	0.0285863	-1.8103
ENSG00000107937.18	protein_coding	GTPBP4	2	OTTHUMG00000017538.5	chr10	HAVANA	gene	988019	1019936	+	-0.417771	0.74858	7.87078	-3.8418	0.00129984	0.0217199	-1.81364
ENSG00000106080.10	protein_coding	FKBP14	2	OTTHUMG00000023442.3	chr7	HAVANA	gene	30010587	30026684	-	-0.608973	0.655663	5.15233	-3.73575	0.00163696	0.0258189	-1.82121
ENSG00000072682.18	protein_coding	P4HA2	1	OTTHUMG00000059647.11	chr5	HAVANA	gene	132191838	132295315	-	-0.650157	0.637211	4.61291	-3.72175	0.00168756	0.0262558	-1.8214
ENSG00000171940.13	protein_coding	ZNF217	1	OTTHUMG00000032764.5	chr20	HAVANA	gene	53567065	53609907	-	-2.49957	0.176829	-0.0690352	-3.33212	0.00393216	0.0481828	-1.82234
ENSG00000269899.1	sense_intronic	RP11-589N15.2	2	OTTHUMG00000183972.1	chr8	HAVANA	gene	11846154	11846391	-	2.64593	6.25898	-0.96321	3.366	0.00365411	0.04573	-1.82467
ENSG00000196781.14	protein_coding	TLE1	2	OTTHUMG00000021008.2	chr9	HAVANA	gene	81583683	81689305	-	0.79384	1.73368	4.37451	3.63931	0.00201888	0.0301834	-1.83222
ENSG00000158747.14	protein_coding	NBL1	1	OTTHUMG00000002700.7	chr1	HAVANA	gene	19596979	19658456	+	-0.597125	0.66107	6.68929	-3.81028	0.00139205	0.0227755	-1.83279
ENSG00000075151.20	protein_coding	EIF4G3	1	OTTHUMG00000002624.7	chr1	HAVANA	gene	20806292	21176888	-	-0.447137	0.733497	5.63474	-3.76456	0.00153756	0.0245819	-1.83333
ENSG00000137198.9	protein_coding	GMPR	2	OTTHUMG00000014302.3	chr6	HAVANA	gene	16238580	16295549	+	-0.942538	0.520317	2.69923	-3.58336	0.00227999	0.0330255	-1.83333
ENSG00000111321.10	protein_coding	LTBR	1	OTTHUMG00000168356.3	chr12	HAVANA	gene	6375045	6391571	+	-0.596049	0.661563	8.33718	-3.83869	0.00130866	0.021794	-1.83925
ENSG00000224897.6	antisense	RP11-3B12.1	2	OTTHUMG00000157170.1	chr7	HAVANA	gene	124929873	125179315	+	1.33946	2.53056	1.21236	3.36022	0.00370012	0.0462282	-1.842
ENSG00000105835.11	protein_coding	NAMPT	2	OTTHUMG00000140388.4	chr7	HAVANA	gene	106248285	106286326	-	-1.51826	0.349106	5.05752	-3.72182	0.0016873	0.0262558	-1.84621
ENSG00000125170.10	protein_coding	DOK4	2	OTTHUMG00000133460.8	chr16	HAVANA	gene	57471922	57487327	-	1.25994	2.39486	2.29986	3.42067	0.00324585	0.0421056	-1.84882
ENSG00000113460.12	protein_coding	BRIX1	2	OTTHUMG00000162021.2	chr5	HAVANA	gene	34915376	34925996	+	-0.452273	0.73089	7.92807	-3.83045	0.00133233	0.0220649	-1.84888
ENSG00000114812.12	protein_coding	VIPR1	1	OTTHUMG00000131792.8	chr3	HAVANA	gene	42489299	42537573	+	-1.22371	0.428181	1.12909	-3.36922	0.00362865	0.0454878	-1.85158
ENSG00000162896.5	protein_coding	PIGR	2	OTTHUMG00000036581.1	chr1	HAVANA	gene	206928518	206946466	-	2.34263	5.07226	-1.61398	3.29643	0.00424762	0.0508	-1.85884
ENSG00000244509.3	protein_coding	APOBEC3C	2	OTTHUMG00000151087.3	chr22	HAVANA	gene	39014083	39020352	+	0.473131	1.38812	5.88822	3.75479	0.00157057	0.0250099	-1.87117
ENSG00000158715.5	protein_coding	SLC45A3	2	OTTHUMG00000037223.1	chr1	HAVANA	gene	205657851	205680459	-	-0.869534	0.547324	3.9971	-3.65469	0.00195252	0.0294856	-1.87561
ENSG00000137103.18	protein_coding	TMEM8B	2	OTTHUMG00000019885.7	chr9	HAVANA	gene	35814451	35865518	+	0.760587	1.69418	3.53087	3.58067	0.00229337	0.033069	-1.87641
ENSG00000135373.12	protein_coding	EHF	1	OTTHUMG00000166454.2	chr11	HAVANA	gene	34621093	34661057	+	-2.15877	0.223947	-1.41442	-3.28582	0.00434612	0.0514526	-1.8766
ENSG00000163931.15	protein_coding	TKT	2	OTTHUMG00000158192.2	chr3	HAVANA	gene	53224707	53256052	-	0.624086	1.54123	9.71543	3.84058	0.00130329	0.0217532	-1.88073
ENSG00000197483.9	protein_coding	ZNF628	2	OTTHUMG00000150396.4	chr19	HAVANA	gene	55476332	55484487	+	-1.07709	0.473982	1.60045	-3.39016	0.00346777	0.0441394	-1.88518
ENSG00000135047.14	protein_coding	CTSL	2	OTTHUMG00000020149.1	chr9	HAVANA	gene	87725519	87731393	+	-0.545294	0.685252	8.29788	-3.81583	0.00137535	0.0226053	-1.89146
ENSG00000067533.5	protein_coding	RRP15	2	OTTHUMG00000039494.4	chr1	HAVANA	gene	218285287	218337983	+	-0.479341	0.717305	5.79705	-3.74581	0.00160155	0.0254218	-1.89549
ENSG00000010295.19	protein_coding	IFFO1	2	OTTHUMG00000141264.3	chr12	HAVANA	gene	6538375	6556083	-	-1.18708	0.439191	1.45054	-3.43472	0.00314846	0.0413825	-1.89744
ENSG00000147872.9	protein_coding	PLIN2	2	OTTHUMG00000019624.2	chr9	HAVANA	gene	19108375	19149290	-	-0.500801	0.706714	7.10037	-3.7872	0.00146369	0.023608	-1.9029
ENSG00000114850.6	protein_coding	SSR3	1	OTTHUMG00000158632.1	chr3	HAVANA	gene	156540140	156555184	-	-0.558283	0.67911	7.78347	-3.79951	0.00142503	0.0231122	-1.90344
ENSG00000106714.17	protein_coding	CNTNAP3	2	OTTHUMG00000019954.4	chr9	HAVANA	gene	39072767	39288315	-	1.39173	2.62394	0.334875	3.28159	0.004386	0.0517148	-1.90349
ENSG00000188064.9	protein_coding	WNT7B	1	OTTHUMG00000154636.2	chr22	HAVANA	gene	45920362	45977129	-	-1.2295	0.426466	0.828213	-3.35879	0.00371155	0.0462935	-1.92409
ENSG00000171488.14	protein_coding	LRRC8C	2	OTTHUMG00000010305.5	chr1	HAVANA	gene	89633072	89769903	+	-1.02873	0.490141	1.91295	-3.44246	0.00309605	0.0410192	-1.9295
ENSG00000177200.16	protein_coding	CHD9	1	OTTHUMG00000173188.6	chr16	HAVANA	gene	53055033	53329150	+	-0.744422	0.596907	3.80133	-3.5976	0.00221052	0.0321755	-1.93072
ENSG00000148677.6	protein_coding	ANKRD1	2	OTTHUMG00000018734.1	chr10	HAVANA	gene	90912096	90921276	-	-2.617	0.163006	-0.319891	-3.2552	0.0046433	0.053775	-1.93119
ENSG00000099282.9	protein_coding	TSPAN15	1	OTTHUMG00000018381.3	chr10	HAVANA	gene	69451473	69507669	+	0.929399	1.90448	3.61895	3.58143	0.00228961	0.0330684	-1.93487
ENSG00000205436.7	protein_coding	EXOC3L4	2	OTTHUMG00000171888.2	chr14	HAVANA	gene	103100144	103110559	+	1.6181	3.0697	-0.0213603	3.26074	0.00458806	0.053285	-1.93605
ENSG00000155893.12	protein_coding	PXYLP1	1	OTTHUMG00000160171.5	chr3	HAVANA	gene	141228726	141367753	+	-0.780802	0.582043	2.40024	-3.45263	0.0030285	0.0404478	-1.93792
ENSG00000240694.8	protein_coding	PNMA2	2	OTTHUMG00000163816.4	chr8	HAVANA	gene	26504686	26514092	-	-1.67553	0.313052	0.759505	-3.28371	0.00436598	0.0516072	-1.94135
ENSG00000118515.11	protein_coding	SGK1	2	OTTHUMG00000015613.5	chr6	HAVANA	gene	134169246	134318112	-	-0.76483	0.588523	3.95975	-3.56287	0.00238381	0.0340986	-1.9416
ENSG00000168772.10	protein_coding	CXXC4	2	OTTHUMG00000131121.3	chr4	HAVANA	gene	104468312	104494901	-	1.93266	3.81758	0.650253	3.26939	0.00450312	0.0526423	-1.95177
ENSG00000270055.1	sense_intronic	CTD-3092A11.2	2	OTTHUMG00000183910.1	chr15	HAVANA	gene	30487963	30490313	+	-1.03266	0.488809	1.32976	-3.35	0.00378283	0.0469078	-1.95374
ENSG00000285294.1	lincRNA	CH17-335B8.6	2	OTTHUMG00000192454.1	chr10	HAVANA	gene	46398362	46453306	+	2.96125	7.78801	-1.21766	3.29463	0.00426416	0.0508866	-1.95465
ENSG00000125744.11	protein_coding	RTN2	2	OTTHUMG00000182123.1	chr19	HAVANA	gene	45485289	45497061	-	0.820167	1.76561	2.91778	3.46984	0.00291747	0.0396419	-1.95757
ENSG00000269713.7	protein_coding	NBPF9	2	OTTHUMG00000013845.9	chr1	HAVANA	gene	149054027	149103561	-	-1.74109	0.299143	-0.0509797	-3.26685	0.00452795	0.0528391	-1.9603
ENSG00000181722.16	protein_coding	ZBTB20	1	OTTHUMG00000159366.4	chr3	HAVANA	gene	114314501	115147271	-	0.589438	1.50466	5.10667	3.66257	0.00191932	0.0291615	-1.96171
ENSG00000120915.13	protein_coding	EPHX2	1	OTTHUMG00000102115.6	chr8	HAVANA	gene	27490779	27545564	+	1.22039	2.3301	2.00737	3.33861	0.00387729	0.0476824	-1.96217
ENSG00000082293.12	protein_coding	COL19A1	2	OTTHUMG00000014987.4	chr6	HAVANA	gene	69866571	70209976	+	2.28512	4.87405	-0.634595	3.24684	0.00472783	0.0544157	-1.96354
ENSG00000271590.1	lincRNA	RP11-181E10.3	2	OTTHUMG00000185273.1	chr2	HAVANA	gene	111210995	111212476	-	-1.26729	0.415438	0.921834	-3.33431	0.00391357	0.0480492	-1.96708
ENSG00000249852.1	TEC	AC145676.2	2	OTTHUMG00000160234.1	chr7	HAVANA	gene	227554	229557	-	-1.93659	0.261234	-1.54753	-3.24291	0.00476807	0.054752	-1.97185
ENSG00000120860.10	protein_coding	WASHC3	2	OTTHUMG00000168187.1	chr12	HAVANA	gene	102012927	102062149	-	0.530822	1.44475	4.94847	3.64357	0.00200029	0.0300277	-1.97202
ENSG00000159128.14	protein_coding	IFNGR2	2	OTTHUMG00000065188.5	chr21	HAVANA	gene	33402896	33479348	+	-0.446097	0.734026	6.23805	-3.72883	0.00166178	0.0259998	-1.9738
ENSG00000183579.15	protein_coding	ZNRF3	2	OTTHUMG00000151009.2	chr22	HAVANA	gene	28883592	29057487	+	-0.544628	0.685568	4.25463	-3.60113	0.00219361	0.0319607	-1.97384
ENSG00000070371.15	protein_coding	CLTCL1	2	OTTHUMG00000150109.10	chr22	HAVANA	gene	19179473	19291716	-	1.08091	2.11537	1.8174	3.34532	0.00382136	0.0473178	-1.97498
ENSG00000123815.11	protein_coding	ADCK4	2	OTTHUMG00000182620.7	chr19	HAVANA	gene	40691529	40718207	-	0.648592	1.56764	3.62688	3.53133	0.0025529	0.035965	-1.97695
ENSG00000074266.19	protein_coding	EED	1	OTTHUMG00000167209.6	chr11	HAVANA	gene	86244544	86278813	+	-0.527198	0.693901	5.12744	-3.67192	0.00188073	0.0286869	-1.97756
ENSG00000267577.1	antisense	CTD-2587H24.5	2	OTTHUMG00000180668.2	chr19	HAVANA	gene	55158939	55177540	+	-1.65534	0.317462	-0.0641905	-3.24895	0.00470629	0.0543324	-1.97985
ENSG00000102595.19	protein_coding	UGGT2	2	OTTHUMG00000017230.4	chr13	HAVANA	gene	95801580	96053482	-	-0.709613	0.611484	3.34766	-3.52575	0.00258401	0.0363689	-1.98178
ENSG00000100151.15	protein_coding	PICK1	2	OTTHUMG00000151159.4	chr22	HAVANA	gene	38056311	38075701	+	0.951557	1.93396	2.72979	3.4053	0.00335583	0.0431195	-1.98242
ENSG00000154734.14	protein_coding	ADAMTS1	2	OTTHUMG00000078688.4	chr21	HAVANA	gene	26835747	26845409	-	-0.781575	0.581731	3.97375	-3.5536	0.00243229	0.034659	-1.98356
ENSG00000176597.11	protein_coding	B3GNT5	1	OTTHUMG00000158436.2	chr3	HAVANA	gene	183253244	183298504	+	-0.949108	0.517953	2.36546	-3.43136	0.00317149	0.0415846	-1.98555
ENSG00000176049.15	protein_coding	JAKMIP2	2	OTTHUMG00000129731.2	chr5	HAVANA	gene	147585439	147782848	-	2.62954	6.1883	-1.44873	3.26721	0.00452443	0.0528391	-1.98659
ENSG00000196756.11	processed_transcript	RP4-564F22.2	2	OTTHUMG00000032442.3	chr20	HAVANA	gene	38420588	38435353	-	-0.547271	0.684314	6.86733	-3.73585	0.00163661	0.0258189	-1.99114
ENSG00000167617.2	protein_coding	CDC42EP5	2	OTTHUMG00000065699.1	chr19	HAVANA	gene	54465026	54473264	-	2.18659	4.55229	0.412926	3.21821	0.00502901	0.0570079	-1.99452
ENSG00000158156.7	protein_coding	XKR8	2	OTTHUMG00000003912.1	chr1	HAVANA	gene	27959462	27968096	+	0.981225	1.97414	2.13381	3.37882	0.00355402	0.0450065	-1.99615
ENSG00000109436.7	protein_coding	TBC1D9	2	OTTHUMG00000161405.2	chr4	HAVANA	gene	140620765	140756120	-	0.840284	1.7904	3.28761	3.46394	0.00295512	0.039901	-2
ENSG00000177000.11	protein_coding	MTHFR	2	OTTHUMG00000002277.5	chr1	HAVANA	gene	11785723	11806920	-	0.800731	1.74198	3.50913	3.48244	0.00283881	0.0389976	-2.00029
ENSG00000263142.5	transcribed_unprocessed_pseudogene	RP11-156P1.1	2	OTTHUMG00000178082.1	chr17	HAVANA	gene	46978481	47054569	+	1.6485	3.13508	0.0507816	3.21975	0.00501234	0.0569428	-2.00154
ENSG00000159176.13	protein_coding	CSRP1	2	OTTHUMG00000035773.4	chr1	HAVANA	gene	201483530	201509456	-	-0.671585	0.627817	5.35839	-3.66045	0.00192819	0.0292665	-2.00824
ENSG00000108602.17	protein_coding	ALDH3A1	2	OTTHUMG00000059469.11	chr17	HAVANA	gene	19737984	19748943	-	0.967496	1.95544	3.50318	3.50393	0.00270941	0.0376363	-2.00841
ENSG00000135951.14	protein_coding	TSGA10	2	OTTHUMG00000130637.3	chr2	HAVANA	gene	98997261	99154964	-	1.14065	2.2048	2.11177	3.37359	0.00359451	0.045209	-2.01335
ENSG00000285407.1	lincRNA	RP11-520E6.1	2	OTTHUMG00000192366.1	chr1	HAVANA	gene	68679202	68943452	+	2.38062	5.20759	-0.727237	3.21483	0.00506572	0.0572872	-2.0171
ENSG00000134317.17	protein_coding	GRHL1	2	OTTHUMG00000151704.6	chr2	HAVANA	gene	9951693	10002277	+	1.17917	2.26447	1.12843	3.29001	0.00430694	0.0511922	-2.01807
ENSG00000152078.9	protein_coding	TMEM56	2	OTTHUMG00000010847.2	chr1	HAVANA	gene	95117338	95197607	+	0.806198	1.7486	4.08512	3.52493	0.00258861	0.0363993	-2.02008
ENSG00000242474.2	lincRNA	AC093627.9	2	OTTHUMG00000151405.2	chr7	HAVANA	gene	135853	149466	-	-1.2578	0.41818	1.06043	-3.29616	0.00425009	0.0508	-2.0212
ENSG00000118898.15	protein_coding	PPL	2	OTTHUMG00000129528.8	chr16	HAVANA	gene	4882507	4960741	-	1.78142	3.43765	-0.139951	3.20251	0.00520202	0.0583856	-2.02965
ENSG00000139132.14	protein_coding	FGD4	1	OTTHUMG00000137374.7	chr12	HAVANA	gene	32399529	32646050	+	1.34896	2.54729	2.17239	3.29907	0.00422349	0.0506037	-2.03415
ENSG00000248508.6	lincRNA	RP11-521C20.4	2	OTTHUMG00000172392.2	chr15	HAVANA	gene	40039311	40067290	+	0.615212	1.53178	4.7053	3.58495	0.00227215	0.0329761	-2.04197
ENSG00000065802.11	protein_coding	ASB1	1	OTTHUMG00000152866.1	chr2	HAVANA	gene	238426742	238452250	+	-0.79435	0.576603	4.87498	-3.60858	0.00215837	0.0316777	-2.04322
ENSG00000152127.8	protein_coding	MGAT5	1	OTTHUMG00000131681.3	chr2	HAVANA	gene	134119983	134454621	+	-0.66842	0.629195	4.59577	-3.61633	0.00212235	0.0312894	-2.04545
ENSG00000231799.2	processed_pseudogene	RP13-93L13.2	1	OTTHUMG00000020186.2	chr9	HAVANA	gene	89449558	89450754	+	-1.58916	0.332364	0.0490565	-3.20067	0.00522275	0.0585301	-2.05158
ENSG00000139269.2	protein_coding	INHBE	2	OTTHUMG00000169995.2	chr12	HAVANA	gene	57452323	57459280	+	1.20254	2.30145	3.40361	3.30639	0.00415716	0.0500686	-2.0525
ENSG00000138650.8	protein_coding	PCDH10	1	OTTHUMG00000161301.4	chr4	HAVANA	gene	133149315	133208606	+	0.822881	1.76894	3.58969	3.49047	0.00278971	0.0384294	-2.05793
ENSG00000253731.2	protein_coding	PCDHGA6	2	OTTHUMG00000163684.2	chr5	HAVANA	gene	141373914	141512979	+	1.72904	3.31506	-0.395196	3.19221	0.00531874	0.0593827	-2.05872
ENSG00000160345.12	protein_coding	C9orf116	2	OTTHUMG00000020902.2	chr9	HAVANA	gene	135495181	135501734	-	0.670878	1.59204	4.81257	3.60419	0.00217906	0.0318733	-2.06396
ENSG00000110619.17	protein_coding	CARS	2	OTTHUMG00000010927.9	chr11	HAVANA	gene	3000922	3057613	-	-0.500197	0.70701	5.59081	-3.63779	0.00202558	0.0302518	-2.06566
ENSG00000092964.17	protein_coding	DPYSL2	1	OTTHUMG00000099439.7	chr8	HAVANA	gene	26514022	26658178	+	-0.630279	0.646051	4.28305	-3.58053	0.00229409	0.033069	-2.06725
ENSG00000074842.7	protein_coding	C19orf10	2	OTTHUMG00000182039.1	chr19	HAVANA	gene	4641374	4670370	-	-0.42349	0.745619	8.53207	-3.73603	0.00163598	0.0258189	-2.07471
ENSG00000100106.20	protein_coding	TRIOBP	2	OTTHUMG00000150657.11	chr22	HAVANA	gene	37696988	37776556	+	-0.381982	0.767383	6.24058	-3.68139	0.00184237	0.0281936	-2.07492
ENSG00000164715.5	protein_coding	LMTK2	2	OTTHUMG00000154256.3	chr7	HAVANA	gene	98106885	98209633	+	-0.709785	0.611411	4.73882	-3.60317	0.0021839	0.0319128	-2.07532
ENSG00000204054.13	processed_transcript	RP11-492E3.1	2	OTTHUMG00000020783.9	chr9	HAVANA	gene	129483451	129513686	+	0.546141	1.46017	5.00295	3.60132	0.00219273	0.0319607	-2.07636
ENSG00000153815.16	protein_coding	CMIP	1	OTTHUMG00000176520.4	chr16	HAVANA	gene	81445170	81711762	+	0.687267	1.61023	5.52028	3.61906	0.00210976	0.0311464	-2.08094
ENSG00000256612.7	transcribed_unprocessed_pseudogene	CYP2B7P1	2	OTTHUMG00000182706.6	chr19	HAVANA	gene	40924219	40950660	+	3.1402	8.81646	0.28187	3.16881	0.0055935	0.0614832	-2.08614
ENSG00000198176.12	protein_coding	TFDP1	2	OTTHUMG00000017388.6	chr13	HAVANA	gene	113584721	113641470	+	-0.485173	0.714411	6.30983	-3.68481	0.00182873	0.0280136	-2.08623
ENSG00000184838.14	protein_coding	PRR16	2	OTTHUMG00000128903.4	chr5	HAVANA	gene	120464278	120687332	+	0.719943	1.64712	4.07343	3.47408	0.00289078	0.0394673	-2.08807
ENSG00000125618.16	protein_coding	PAX8	1	OTTHUMG00000128529.11	chr2	HAVANA	gene	113215997	113278950	-	1.06649	2.09433	3.28682	3.40116	0.00338606	0.0433584	-2.08947
ENSG00000258704.6	transcribed_unitary_pseudogene	RP11-85K15.2	2	OTTHUMG00000170821.4	chr14	HAVANA	gene	34920858	34982532	-	0.891205	1.85472	3.05523	3.42864	0.00319025	0.041665	-2.08999
ENSG00000138336.8	protein_coding	TET1	2	OTTHUMG00000018359.1	chr10	HAVANA	gene	68560656	68694482	+	1.87848	3.67688	0.120605	3.16548	0.00563383	0.0618808	-2.09294
ENSG00000140157.14	protein_coding	NIPA2	2	OTTHUMG00000129101.3	chr15	HAVANA	gene	22838641	22868384	+	-0.487777	0.713123	5.19015	-3.62876	0.00206576	0.0306675	-2.09385
ENSG00000227533.5	lincRNA	RP5-848E13.3	2	OTTHUMG00000007699.1	chr1	HAVANA	gene	42959049	42983358	+	1.52524	2.87834	0.158737	3.17887	0.00547376	0.0606139	-2.10165
ENSG00000174307.6	protein_coding	PHLDA3	2	OTTHUMG00000035767.3	chr1	HAVANA	gene	201464383	201469237	-	0.664483	1.585	4.0366	3.49996	0.00273286	0.0378914	-2.10346
ENSG00000107738.19	protein_coding	VSIR	2	OTTHUMG00000018426.4	chr10	HAVANA	gene	71747559	71773498	-	0.938383	1.91638	2.73098	3.31563	0.00407492	0.0494195	-2.10428
ENSG00000204860.4	antisense	FAM201A	1	OTTHUMG00000019948.2	chr9	HAVANA	gene	38620474	38624990	+	0.881195	1.8419	3.13305	3.42358	0.00322546	0.0419507	-2.10525
ENSG00000272523.1	lincRNA	CTC-329H14.4	2	OTTHUMG00000185544.1	chr5	HAVANA	gene	108727825	108728260	-	0.990235	1.98651	2.20466	3.31601	0.00407156	0.0494191	-2.10596
ENSG00000146083.11	protein_coding	RNF44	2	OTTHUMG00000130664.3	chr5	HAVANA	gene	176526697	176538025	-	0.766707	1.70138	4.84489	3.56207	0.00238795	0.034125	-2.10686
ENSG00000128228.4	protein_coding	SDF2L1	2	OTTHUMG00000150820.1	chr22	HAVANA	gene	21642261	21644298	+	-0.603676	0.658075	6.12909	-3.65784	0.00193916	0.0293931	-2.11154
ENSG00000116106.11	protein_coding	EPHA4	1	OTTHUMG00000133142.7	chr2	HAVANA	gene	221418027	221574202	-	-1.06015	0.479583	1.28024	-3.27151	0.00448261	0.0525261	-2.11273
ENSG00000139174.11	protein_coding	PRICKLE1	2	OTTHUMG00000169443.4	chr12	HAVANA	gene	42456757	42590355	-	1.30958	2.47869	1.70217	3.26218	0.00457385	0.0532188	-2.11477
ENSG00000126458.3	protein_coding	RRAS	2	OTTHUMG00000183247.1	chr19	HAVANA	gene	49635292	49640201	-	0.673904	1.59538	5.89641	3.63342	0.00204492	0.0304186	-2.11483
ENSG00000197746.13	protein_coding	PSAP	2	OTTHUMG00000018429.5	chr10	HAVANA	gene	71816298	71851375	-	0.421195	1.33904	9.48935	3.72468	0.00167685	0.0261711	-2.11601
ENSG00000167522.15	protein_coding	ANKRD11	1	OTTHUMG00000175548.13	chr16	HAVANA	gene	89267619	89490561	-	-0.605296	0.657336	8.37277	-3.70745	0.00174086	0.0269444	-2.11802
ENSG00000169490.16	protein_coding	TM2D2	2	OTTHUMG00000164098.3	chr8	HAVANA	gene	38988808	38996824	-	0.443097	1.35952	5.2023	3.60503	0.00217509	0.0318465	-2.11901
ENSG00000065809.13	protein_coding	FAM107B	2	OTTHUMG00000017709.4	chr10	HAVANA	gene	14518557	14774897	-	-0.501036	0.706599	6.50121	-3.6566	0.00194442	0.0293931	-2.12667
ENSG00000140526.17	protein_coding	ABHD2	2	OTTHUMG00000148684.5	chr15	HAVANA	gene	89087459	89202360	+	-0.539936	0.687801	6.43239	-3.66468	0.00191056	0.0290878	-2.12799
ENSG00000171444.17	protein_coding	MCC	2	OTTHUMG00000128804.10	chr5	HAVANA	gene	113022099	113488830	-	0.806313	1.74874	3.45343	3.43842	0.00312333	0.0412113	-2.13076
ENSG00000172037.13	protein_coding	LAMB2	2	OTTHUMG00000156807.4	chr3	HAVANA	gene	49121114	49133118	-	0.659558	1.5796	4.33235	3.49567	0.00275841	0.0381393	-2.13296
ENSG00000114779.19	protein_coding	ABHD14B	2	OTTHUMG00000157816.23	chr3	HAVANA	gene	51968510	51983409	-	0.430355	1.34757	6.40943	3.64589	0.00199025	0.029934	-2.13687
ENSG00000170006.11	protein_coding	TMEM154	2	OTTHUMG00000161463.1	chr4	HAVANA	gene	152618632	152680165	-	-1.03679	0.48741	1.72915	-3.33702	0.00389068	0.0478076	-2.13733
ENSG00000105711.11	protein_coding	SCN1B	2	OTTHUMG00000182472.4	chr19	HAVANA	gene	35030466	35040449	+	-0.815375	0.568261	2.34329	-3.38145	0.00353381	0.0448268	-2.13884
ENSG00000108175.16	protein_coding	ZMIZ1	2	OTTHUMG00000018560.2	chr10	HAVANA	gene	79069035	79316528	+	0.571068	1.48562	5.87196	3.63479	0.00203884	0.0303602	-2.14196
ENSG00000099860.8	protein_coding	GADD45B	2	OTTHUMG00000180434.3	chr19	HAVANA	gene	2476122	2478259	+	0.754409	1.68694	4.40728	3.48201	0.00284144	0.0389979	-2.14836
ENSG00000219607.3	protein_coding	PPP1R3G	2	OTTHUMG00000014172.4	chr6	HAVANA	gene	5084581	5089487	+	2.57899	5.97522	-0.784466	3.13729	0.00598582	0.0646029	-2.14849
ENSG00000164161.9	protein_coding	HHIP	2	OTTHUMG00000161428.2	chr4	HAVANA	gene	144646021	144745271	+	-1.77055	0.293097	-0.122497	-3.15896	0.00571338	0.0623228	-2.14918
ENSG00000255517.6	antisense	CTD-3074O7.5	1	OTTHUMG00000167095.2	chr11	HAVANA	gene	66473490	66480233	-	1.17931	2.26468	2.23233	3.28219	0.00438037	0.0516939	-2.15206
ENSG00000170989.8	protein_coding	S1PR1	2	OTTHUMG00000010835.1	chr1	HAVANA	gene	101236888	101241518	+	3.53537	11.5945	-1.26998	3.15848	0.0057192	0.0623228	-2.16027
ENSG00000250159.6	antisense	RP11-381K20.2	2	OTTHUMG00000163307.2	chr5	HAVANA	gene	137814333	137889336	-	0.921916	1.89463	2.62348	3.34077	0.00385921	0.0475777	-2.16382
ENSG00000134240.11	protein_coding	HMGCS2	2	OTTHUMG00000012101.3	chr1	HAVANA	gene	119747996	119768905	-	2.42435	5.36786	-1.84385	3.17458	0.00552452	0.06104	-2.16428
ENSG00000174405.13	protein_coding	LIG4	2	OTTHUMG00000017328.5	chr13	HAVANA	gene	108207439	108218368	-	-1.91549	0.265081	-0.487503	-3.13697	0.00599001	0.0646029	-2.16433
ENSG00000121775.17	protein_coding	TMEM39B	2	OTTHUMG00000004020.9	chr1	HAVANA	gene	32072031	32102866	+	-0.583744	0.66723	5.023	-3.57788	0.00230732	0.0332276	-2.16582
ENSG00000143578.15	protein_coding	CREB3L4	2	OTTHUMG00000037159.3	chr1	HAVANA	gene	153967534	153974363	+	1.004	2.00555	2.84831	3.33974	0.00386782	0.0476399	-2.16639
ENSG00000134504.13	protein_coding	KCTD1	2	OTTHUMG00000131947.6	chr18	HAVANA	gene	26454910	26657401	-	-0.641741	0.640939	4.86149	-3.56905	0.00235204	0.0337544	-2.16806
ENSG00000169752.16	protein_coding	NRG4	2	OTTHUMG00000142917.3	chr15	HAVANA	gene	75935969	76059795	-	1.00485	2.00674	2.17265	3.30602	0.0041605	0.0500686	-2.17247
ENSG00000184924.5	protein_coding	PTRHD1	2	OTTHUMG00000151978.3	chr2	HAVANA	gene	24789734	24793382	-	0.568542	1.48302	6.13392	3.61509	0.00212807	0.0313428	-2.17848
ENSG00000105974.11	protein_coding	CAV1	1	OTTHUMG00000023413.8	chr7	HAVANA	gene	116524785	116561184	+	0.37826	1.29977	9.34374	3.69399	0.00179258	0.0275697	-2.1789
ENSG00000167962.13	protein_coding	ZNF598	2	OTTHUMG00000176955.4	chr16	HAVANA	gene	1997654	2009823	-	-0.748348	0.595285	3.45201	-3.44501	0.00307898	0.0408658	-2.17913
ENSG00000078070.12	protein_coding	MCCC1	2	OTTHUMG00000158355.3	chr3	HAVANA	gene	183015218	183116075	-	0.513198	1.42721	4.87516	3.54888	0.00245739	0.0349165	-2.18032
ENSG00000157168.18	protein_coding	NRG1	2	OTTHUMG00000163918.11	chr8	HAVANA	gene	31639386	32767959	+	-0.584705	0.666786	3.7233	-3.46218	0.00296639	0.0399973	-2.18304
ENSG00000257671.1	antisense	RP3-416H24.1	2	OTTHUMG00000169581.1	chr12	HAVANA	gene	52245048	52247448	-	-2.55417	0.170262	-1.86885	-3.11838	0.00623399	0.0664647	-2.18735
ENSG00000101596.15	protein_coding	SMCHD1	1	OTTHUMG00000178235.5	chr18	HAVANA	gene	2655738	2805017	+	-0.917188	0.52954	1.97225	-3.32825	0.00396521	0.0484357	-2.18801
ENSG00000126603.8	protein_coding	GLIS2	2	OTTHUMG00000129467.1	chr16	HAVANA	gene	4314761	4339597	+	0.463043	1.37845	5.99444	3.61062	0.00214885	0.0315863	-2.19611
ENSG00000197965.11	protein_coding	MPZL1	1	OTTHUMG00000034571.4	chr1	HAVANA	gene	167721192	167791919	+	-0.442705	0.735754	6.77267	-3.63929	0.00201898	0.0301834	-2.19626
ENSG00000170153.10	protein_coding	RNF150	1	OTTHUMG00000161380.5	chr4	HAVANA	gene	140859807	141212877	-	1.57118	2.97148	0.963995	3.1235	0.00616576	0.0660334	-2.19646
ENSG00000160703.15	protein_coding	NLRX1	2	OTTHUMG00000154476.5	chr11	HAVANA	gene	119166568	119184016	+	0.752042	1.68418	3.33914	3.37515	0.00358236	0.045209	-2.19682
ENSG00000269609.5	processed_transcript	RP11-18I14.10	2	OTTHUMG00000182529.1	chr10	HAVANA	gene	102449817	102461106	+	0.893986	1.8583	2.86562	3.3315	0.00393738	0.0481828	-2.19793
ENSG00000243445.1	processed_pseudogene	RP11-715J22.1	1	OTTHUMG00000158080.1	chr16	HAVANA	gene	2332313	2332732	-	2.36888	5.16538	-0.292376	3.09817	0.00651033	0.0683356	-2.20997
ENSG00000144810.15	protein_coding	COL8A1	2	OTTHUMG00000148669.3	chr3	HAVANA	gene	99638475	99799226	+	-1.18901	0.438605	1.82921	-3.26332	0.00456254	0.0531286	-2.2105
ENSG00000075131.9	protein_coding	TIPIN	2	OTTHUMG00000133188.3	chr15	HAVANA	gene	66336206	66386746	-	-0.715902	0.608824	3.70519	-3.46762	0.0029316	0.0397231	-2.21575
ENSG00000253671.1	processed_transcript	RP11-806O11.1	2	OTTHUMG00000163706.1	chr8	HAVANA	gene	17808941	17820868	+	2.97971	7.88829	-0.660374	3.12075	0.00620234	0.066222	-2.21593
ENSG00000143878.9	protein_coding	RHOB	2	OTTHUMG00000090755.3	chr2	HAVANA	gene	20447074	20449445	+	0.730854	1.65962	4.6208	3.44002	0.00311248	0.0411273	-2.21982
ENSG00000154721.14	protein_coding	JAM2	2	OTTHUMG00000078441.3	chr21	HAVANA	gene	25639272	25717562	+	1.46284	2.7565	0.960976	3.15841	0.00572007	0.0623228	-2.2231
ENSG00000110002.15	protein_coding	VWA5A	1	OTTHUMG00000165971.2	chr11	HAVANA	gene	124115362	124147721	+	1.33739	2.52693	0.602933	3.17948	0.00546656	0.0605792	-2.22314
ENSG00000224184.5	lincRNA	AC096559.1	2	OTTHUMG00000151709.2	chr2	HAVANA	gene	11848622	12578348	+	-1.79482	0.288208	-0.862539	-3.1099	0.00634846	0.0671567	-2.22563
ENSG00000130725.7	protein_coding	UBE2M	2	OTTHUMG00000183548.2	chr19	HAVANA	gene	58555712	58558960	-	-0.439057	0.737617	7.37857	-3.6426	0.0020045	0.0300574	-2.22646
ENSG00000262877.4	lincRNA	RP11-1055B8.4	2	OTTHUMG00000177951.4	chr17	HAVANA	gene	81388126	81390256	-	1.45266	2.73713	0.684219	3.13734	0.00598522	0.0646029	-2.22808
ENSG00000168214.20	protein_coding	RBPJ	1	OTTHUMG00000097793.10	chr4	HAVANA	gene	26163455	26435131	+	-0.504619	0.704846	5.18205	-3.55659	0.00241656	0.0345009	-2.23522
ENSG00000214274.9	protein_coding	ANG	1	OTTHUMG00000029576.3	chr14	HAVANA	gene	20684177	20698971	+	0.9323	1.90832	2.41627	3.30442	0.00417492	0.0501427	-2.23722
ENSG00000228439.5	protein_coding	TSTD3	2	OTTHUMG00000015265.3	chr6	HAVANA	gene	99520693	99531918	+	0.766532	1.70117	2.99317	3.34445	0.0038286	0.0473178	-2.23827
ENSG00000244184.1	antisense	RP11-314A20.2	2	OTTHUMG00000157665.1	chr17	HAVANA	gene	4704230	4705529	+	2.08056	4.22971	0.250637	3.08271	0.0067298	0.0699984	-2.24469
ENSG00000105976.14	protein_coding	MET	1	OTTHUMG00000023299.9	chr7	HAVANA	gene	116672390	116798386	+	-0.795999	0.575944	6.26291	-3.60121	0.00219326	0.0319607	-2.24772
ENSG00000230207.1	processed_pseudogene	RP11-87M1.1	1	OTTHUMG00000019537.1	chr9	HAVANA	gene	7477045	7478320	-	1.12142	2.17561	1.22498	3.17275	0.00554627	0.0611896	-2.25044
ENSG00000246695.7	antisense	RP11-877E17.2	2	OTTHUMG00000169126.2	chr12	HAVANA	gene	25939329	25959765	-	0.531665	1.4456	4.07599	3.45956	0.00298328	0.0401153	-2.25267
ENSG00000177106.14	protein_coding	EPS8L2	1	OTTHUMG00000165165.9	chr11	HAVANA	gene	694438	727727	+	2.03533	4.09916	-0.748405	3.07348	0.00686423	0.0708527	-2.25407
ENSG00000224945.1	sense_intronic	RP11-82L18.2	1	OTTHUMG00000020177.1	chr9	HAVANA	gene	89088604	89109934	-	-1.11546	0.461545	1.52519	-3.21816	0.00502954	0.0570079	-2.2567
ENSG00000259721.1	lincRNA	RP11-758N13.1	2	OTTHUMG00000172200.1	chr15	HAVANA	gene	32717270	32719007	-	1.59649	3.02406	1.34634	3.12295	0.00617316	0.0660334	-2.25692
ENSG00000082458.11	protein_coding	DLG3	2	OTTHUMG00000021778.3	chrX	HAVANA	gene	70444861	70505490	+	-0.610839	0.654816	3.57541	-3.43745	0.0031299	0.0412113	-2.25847
ENSG00000165915.13	protein_coding	SLC39A13	1	OTTHUMG00000166890.4	chr11	HAVANA	gene	47407132	47416501	+	-0.492545	0.71077	5.59441	-3.55584	0.0024205	0.034524	-2.26061
ENSG00000143333.6	protein_coding	RGS16	2	OTTHUMG00000035212.1	chr1	HAVANA	gene	182598623	182604408	-	-1.40695	0.377108	1.29353	-3.15363	0.00577925	0.062781	-2.26404
ENSG00000271133.5	antisense	CTA-293F17.1	2	OTTHUMG00000185140.1	chr7	HAVANA	gene	20328299	20331747	-	0.674073	1.59557	2.83785	3.32914	0.00395756	0.0483901	-2.26699
ENSG00000109861.15	protein_coding	CTSC	2	OTTHUMG00000167290.3	chr11	HAVANA	gene	88293592	88337787	-	-0.44007	0.737099	9.19692	-3.65678	0.00194365	0.0293931	-2.26779
ENSG00000155660.10	protein_coding	PDIA4	1	OTTHUMG00000150248.2	chr7	HAVANA	gene	149003062	149028641	-	-0.357644	0.780438	8.46117	-3.64352	0.00200051	0.0300277	-2.27062
ENSG00000100417.11	protein_coding	PMM1	2	OTTHUMG00000150972.3	chr22	HAVANA	gene	41576894	41589890	-	0.62228	1.53931	4.15047	3.44788	0.0030599	0.0407576	-2.2718
ENSG00000215256.3	antisense	DHRS4-AS1	1	OTTHUMG00000171901.1	chr14	HAVANA	gene	23938731	23988839	-	0.660789	1.58095	3.58248	3.40358	0.00336837	0.0432062	-2.27813
ENSG00000182957.15	protein_coding	SPATA13	1	OTTHUMG00000016578.12	chr13	HAVANA	gene	23979805	24307074	+	0.705826	1.63108	3.99034	3.42771	0.00319671	0.041665	-2.28899
ENSG00000145687.16	protein_coding	SSBP2	2	OTTHUMG00000119039.3	chr5	HAVANA	gene	81413021	81751797	-	0.712814	1.639	3.23367	3.35362	0.00375332	0.0466723	-2.2892
ENSG00000164741.14	protein_coding	DLC1	1	OTTHUMG00000090825.9	chr8	HAVANA	gene	13083361	13604610	-	-1.06735	0.477193	1.86854	-3.2261	0.00494415	0.0564262	-2.2921
ENSG00000135924.15	protein_coding	DNAJB2	1	OTTHUMG00000133134.22	chr2	HAVANA	gene	219279267	219286900	+	0.727807	1.65612	3.9898	3.38486	0.00350785	0.0445733	-2.29616
ENSG00000205534.6	unprocessed_pseudogene	RP11-345J4.8	2	OTTHUMG00000176759.1	chr16	HAVANA	gene	29527568	29594966	-	1.8667	3.64698	0.122815	3.05821	0.00709242	0.0727047	-2.2968
ENSG00000260942.1	antisense	RP11-27M15.1	2	OTTHUMG00000170676.1	chr2	HAVANA	gene	240582700	240586699	-	1.1569	2.22978	1.08303	3.11702	0.00625227	0.0665168	-2.30238
ENSG00000253746.1	lincRNA	RP11-527N22.2	2	OTTHUMG00000164278.1	chr8	HAVANA	gene	37405439	37406724	-	-2.06138	0.239587	-0.0680498	-3.06797	0.00694569	0.0715449	-2.30558
ENSG00000120458.10	protein_coding	MSANTD2	1	OTTHUMG00000165931.2	chr11	HAVANA	gene	124766498	124800673	-	-0.61212	0.654235	3.15355	-3.37285	0.00360026	0.045209	-2.30873
ENSG00000168917.8	protein_coding	SLC35G2	2	OTTHUMG00000159787.1	chr3	HAVANA	gene	136818647	136855892	+	-0.768714	0.586941	4.22365	-3.44699	0.0030658	0.0407998	-2.31593
ENSG00000168096.14	protein_coding	ANKS3	1	OTTHUMG00000129478.10	chr16	HAVANA	gene	4696510	4734378	-	-0.569445	0.673876	4.33091	-3.43424	0.00315177	0.0413896	-2.3223
ENSG00000103855.17	protein_coding	CD276	1	OTTHUMG00000137585.8	chr15	HAVANA	gene	73683966	73714518	+	-0.538878	0.688306	6.39357	-3.57374	0.00232818	0.0334957	-2.32387
ENSG00000134480.14	protein_coding	CCNH	1	OTTHUMG00000119077.5	chr5	HAVANA	gene	87318416	87413019	-	-0.45383	0.730102	6.40437	-3.56518	0.00237186	0.0339601	-2.32567
ENSG00000144815.15	protein_coding	NXPE3	2	OTTHUMG00000159179.15	chr3	HAVANA	gene	101779202	101827392	+	0.416506	1.33469	6.02926	3.55009	0.00245095	0.0348581	-2.32802
ENSG00000108375.12	protein_coding	RNF43	2	OTTHUMG00000179077.1	chr17	HAVANA	gene	58352500	58417595	-	-2.0007	0.249878	-0.0862021	-3.0506	0.00720892	0.0735639	-2.33139
ENSG00000198520.10	protein_coding	C1orf228	1	OTTHUMG00000007834.6	chr1	HAVANA	gene	44674692	44725591	+	2.28905	4.88736	-0.544068	3.03117	0.00751484	0.075784	-2.3329
ENSG00000243175.1	transcribed_processed_pseudogene	RP11-58H15.1	1	OTTHUMG00000157578.1	chr4	HAVANA	gene	143424753	143426013	+	2.74484	6.70315	-1.13784	3.03863	0.00739596	0.07494	-2.33313
ENSG00000225791.6	lincRNA	RP1-180E22.3	2	OTTHUMG00000014849.4	chr6	HAVANA	gene	52577307	52583993	+	0.72391	1.65165	3.10064	3.31439	0.00408583	0.0495116	-2.33532
ENSG00000152582.13	protein_coding	SPEF2	1	OTTHUMG00000131111.5	chr5	HAVANA	gene	35617844	35814611	+	0.919562	1.89154	3.1642	3.28673	0.00433763	0.051393	-2.33663
ENSG00000103485.17	protein_coding	QPRT	1	OTTHUMG00000097770.4	chr16	HAVANA	gene	29679008	29698699	+	1.55635	2.94108	1.90258	3.1137	0.00629695	0.066793	-2.33826
ENSG00000203724.10	protein_coding	C1orf53	2	OTTHUMG00000035659.1	chr1	HAVANA	gene	197902647	197907367	+	0.693101	1.61675	5.56423	3.50428	0.00270735	0.0376363	-2.342
ENSG00000143149.12	protein_coding	ALDH9A1	2	OTTHUMG00000034677.2	chr1	HAVANA	gene	165662216	165698863	-	-0.564685	0.676103	3.96943	-3.41326	0.00329842	0.0425285	-2.35278
ENSG00000140945.16	protein_coding	CDH13	1	OTTHUMG00000176635.2	chr16	HAVANA	gene	82626803	83800640	+	-0.43883	0.737733	5.73949	-3.53871	0.00251227	0.0354932	-2.35293
ENSG00000088256.8	protein_coding	GNA11	2	OTTHUMG00000180631.6	chr19	HAVANA	gene	3094410	3124004	+	-0.540503	0.687531	6.1854	-3.54312	0.00248833	0.0352552	-2.35293
ENSG00000163686.14	protein_coding	ABHD6	2	OTTHUMG00000159150.2	chr3	HAVANA	gene	58237506	58295693	+	-0.583184	0.667489	3.73816	-3.39342	0.00344338	0.0440167	-2.35602
ENSG00000172081.13	protein_coding	MOB3A	2	OTTHUMG00000180353.4	chr19	HAVANA	gene	2071038	2096673	-	-0.900827	0.535579	3.56494	-3.3543	0.0037478	0.0466675	-2.36114
ENSG00000112144.15	protein_coding	ICK	2	OTTHUMG00000014870.1	chr6	HAVANA	gene	53001279	53061802	-	0.641961	1.56045	4.88882	3.45924	0.00298538	0.0401153	-2.36119
ENSG00000140563.14	protein_coding	MCTP2	2	OTTHUMG00000171751.8	chr15	HAVANA	gene	94231538	94483952	+	-1.89051	0.269712	-0.493946	-3.01933	0.00770746	0.0771005	-2.36241
ENSG00000187837.3	protein_coding	HIST1H1C	2	OTTHUMG00000016140.2	chr6	HAVANA	gene	26055787	26056428	-	-0.363864	0.777081	9.92633	-3.62304	0.00209159	0.0309277	-2.36625
ENSG00000261971.6	antisense	RP11-473M20.7	2	OTTHUMG00000177474.2	chr16	HAVANA	gene	3051096	3059370	-	1.68892	3.22415	1.37882	3.08547	0.00669003	0.0696819	-2.36657
ENSG00000143924.18	protein_coding	EML4	2	OTTHUMG00000128603.6	chr2	HAVANA	gene	42169350	42332548	+	-0.812532	0.569382	3.85537	-3.40154	0.00338328	0.0433584	-2.36699
ENSG00000100897.17	protein_coding	DCAF11	1	OTTHUMG00000028793.9	chr14	HAVANA	gene	24114195	24125242	+	0.457887	1.37353	5.03213	3.46882	0.00292394	0.0396916	-2.36749
ENSG00000157350.12	protein_coding	ST3GAL2	2	OTTHUMG00000137580.5	chr16	HAVANA	gene	70375978	70439237	-	-0.386494	0.764987	6.75054	-3.56866	0.00235402	0.0337544	-2.36765
ENSG00000236682.1	lincRNA	AC068282.3	1	OTTHUMG00000153398.1	chr2	HAVANA	gene	127389130	127400580	+	1.00308	2.00428	1.88334	3.17021	0.00557669	0.0613888	-2.36815
ENSG00000187800.13	protein_coding	PEAR1	2	OTTHUMG00000041293.4	chr1	HAVANA	gene	156893698	156916434	+	-0.83031	0.562408	2.68772	-3.28075	0.00439396	0.0517148	-2.37635
ENSG00000137177.19	protein_coding	KIF13A	1	OTTHUMG00000014313.8	chr6	HAVANA	gene	17759183	17987623	-	0.514288	1.42829	5.01188	3.45892	0.00298745	0.0401153	-2.37806
ENSG00000196535.15	protein_coding	MYO18A	1	OTTHUMG00000166360.10	chr17	HAVANA	gene	29071124	29180412	-	1.90332	3.74073	0.182977	3.00927	0.00787491	0.0781982	-2.37862
ENSG00000184903.9	protein_coding	IMMP2L	1	OTTHUMG00000155023.8	chr7	HAVANA	gene	110663051	111562517	-	0.462121	1.37757	5.43225	3.48794	0.00280511	0.0385702	-2.38019
ENSG00000132196.13	protein_coding	HSD17B7	2	OTTHUMG00000034420.6	chr1	HAVANA	gene	162790702	162812817	+	0.604338	1.52028	4.1603	3.41608	0.0032783	0.0423423	-2.38108
ENSG00000160949.16	protein_coding	TONSL	2	OTTHUMG00000153122.3	chr8	HAVANA	gene	144428775	144444444	-	-0.656835	0.634268	3.52332	-3.33345	0.00392083	0.0480988	-2.38458
ENSG00000154548.8	protein_coding	SRSF12	2	OTTHUMG00000015192.2	chr6	HAVANA	gene	89095959	89118081	-	0.865715	1.82224	2.456	3.22333	0.00497372	0.0565983	-2.38647
ENSG00000113966.9	protein_coding	ARL6	1	OTTHUMG00000159189.3	chr3	HAVANA	gene	97764521	97801242	+	-0.714902	0.609247	2.45517	-3.26658	0.00453058	0.0528391	-2.38979
ENSG00000147130.14	protein_coding	ZMYM3	2	OTTHUMG00000021799.1	chrX	HAVANA	gene	71239624	71255146	-	0.673633	1.59508	5.11175	3.46838	0.00292675	0.0396936	-2.39329
ENSG00000182165.17	lincRNA	TP53TG1	2	OTTHUMG00000130822.5	chr7	HAVANA	gene	87325225	87345515	-	0.657486	1.57733	4.15876	3.38381	0.00351577	0.0446359	-2.39491
ENSG00000111817.17	protein_coding	DSE	2	OTTHUMG00000015434.15	chr6	HAVANA	gene	116254173	116444860	+	-0.680941	0.623758	5.40968	-3.49645	0.00275375	0.0381393	-2.39563
ENSG00000112855.15	protein_coding	HARS2	2	OTTHUMG00000129500.18	chr5	HAVANA	gene	140691426	140699318	+	0.603716	1.51963	4.52485	3.40744	0.00334028	0.0429567	-2.39969
ENSG00000023608.4	protein_coding	SNAPC1	2	OTTHUMG00000140343.2	chr14	HAVANA	gene	61762357	61796428	+	-0.480391	0.716784	5.91165	-3.5085	0.00268264	0.0374389	-2.40086
ENSG00000197769.5	protein_coding	MAP1LC3C	2	OTTHUMG00000039865.1	chr1	HAVANA	gene	241995490	241999073	-	2.47147	5.5461	-1.23896	2.98884	0.00822598	0.0808228	-2.40449
ENSG00000112365.4	protein_coding	ZBTB24	2	OTTHUMG00000015349.1	chr6	HAVANA	gene	109462594	109483237	-	0.598081	1.5137	4.88277	3.42116	0.0032424	0.0420976	-2.40594
ENSG00000155760.2	protein_coding	FZD7	2	OTTHUMG00000132841.1	chr2	HAVANA	gene	202034587	202038445	+	0.759584	1.693	3.24818	3.30082	0.00420754	0.0504939	-2.40605
ENSG00000179041.3	protein_coding	RRS1	2	OTTHUMG00000164765.2	chr8	HAVANA	gene	66429028	66430733	+	-0.515224	0.699685	6.14119	-3.51765	0.00262985	0.0368748	-2.40851
ENSG00000234779.1	antisense	RP11-62F24.2	2	OTTHUMG00000019591.1	chr9	HAVANA	gene	16726814	16727524	+	0.959949	1.94524	1.9805	3.18087	0.00545028	0.0604437	-2.40918
ENSG00000242147.1	lincRNA	RP13-463N16.6	1	OTTHUMG00000017601.3	chr10	HAVANA	gene	5594991	5596118	-	-1.79312	0.288547	-1.12052	-3.00855	0.00788701	0.078211	-2.40955
ENSG00000132837.14	protein_coding	DMGDH	1	OTTHUMG00000108159.4	chr5	HAVANA	gene	78997606	79236038	-	1.20773	2.30974	1.47772	3.08693	0.00666912	0.0695955	-2.41203
ENSG00000212747.4	protein_coding	FAM127C	2	OTTHUMG00000022464.3	chrX	HAVANA	gene	135020504	135022529	-	0.448821	1.36492	5.7415	3.50405	0.00270869	0.0376363	-2.41262
ENSG00000101473.16	protein_coding	ACOT8	1	OTTHUMG00000033045.6	chr20	HAVANA	gene	45841721	45857406	-	0.650568	1.56979	4.09782	3.39036	0.00346624	0.0441394	-2.41321
ENSG00000274460.1	lincRNA	CTD-2649C14.2	2	OTTHUMG00000186800.1	chr16	HAVANA	gene	21950218	21951708	-	1.39467	2.62928	0.746398	3.03705	0.00742095	0.0750821	-2.41747
ENSG00000259498.1	antisense	RP11-244F12.3	2	OTTHUMG00000172299.1	chr15	HAVANA	gene	63046034	63049387	-	1.33871	2.52925	1.11962	3.05048	0.00721079	0.0735639	-2.41786
ENSG00000104823.8	protein_coding	ECH1	1	OTTHUMG00000182609.2	chr19	HAVANA	gene	38815422	38832005	-	0.446954	1.36316	8.78276	3.57082	0.00234298	0.0336761	-2.42942
ENSG00000169085.11	protein_coding	C8orf46	1	OTTHUMG00000156998.9	chr8	HAVANA	gene	66460003	66518524	+	1.95304	3.87191	-0.210539	2.97512	0.00847014	0.0825107	-2.43065
ENSG00000265491.4	protein_coding	RNF115	2	OTTHUMG00000013758.6	chr1	HAVANA	gene	145738868	145824077	-	0.460549	1.37607	5.62089	3.4761	0.00287815	0.039429	-2.43198
ENSG00000250509.1	lincRNA	CTC-573N18.1	2	OTTHUMG00000163288.1	chr5	HAVANA	gene	180441559	180443238	+	2.35032	5.09938	0.0276377	2.97063	0.00855162	0.0829074	-2.43593
ENSG00000198892.6	protein_coding	SHISA4	2	OTTHUMG00000035807.1	chr1	HAVANA	gene	201888680	201892306	+	0.750821	1.68275	4.71704	3.40878	0.00333065	0.0429069	-2.43899
ENSG00000282860.1	lincRNA	RP11-153F10.2	2	OTTHUMG00000191544.1	chr3	HAVANA	gene	127571232	127571838	-	3.25881	9.57191	-1.10697	2.98761	0.00824759	0.0809284	-2.44104
ENSG00000159399.9	protein_coding	HK2	1	OTTHUMG00000129972.7	chr2	HAVANA	gene	74833981	74893359	+	-0.713761	0.609729	2.83308	-3.28701	0.00433496	0.051393	-2.44279
ENSG00000188493.14	protein_coding	C19orf54	1	OTTHUMG00000150174.6	chr19	HAVANA	gene	40740856	40751553	-	0.782193	1.71974	3.54444	3.28084	0.00439311	0.0517148	-2.44295
ENSG00000168528.11	protein_coding	SERINC2	2	OTTHUMG00000003796.2	chr1	HAVANA	gene	31409565	31434680	+	0.53705	1.451	5.0565	3.43081	0.00317531	0.0415846	-2.44447
ENSG00000157514.16	protein_coding	TSC22D3	2	OTTHUMG00000022168.3	chrX	HAVANA	gene	107713221	107777342	-	0.707286	1.63273	3.83328	3.28054	0.00439602	0.0517148	-2.44901
ENSG00000130720.12	protein_coding	FIBCD1	1	OTTHUMG00000020814.4	chr9	HAVANA	gene	130902438	130939286	-	-1.12726	0.457785	0.540605	-3.08959	0.00663129	0.0693123	-2.44976
ENSG00000163743.13	protein_coding	RCHY1	1	OTTHUMG00000130105.3	chr4	HAVANA	gene	75479037	75514764	-	-0.465664	0.724138	4.76608	-3.42005	0.00325026	0.0421262	-2.45546
ENSG00000029153.14	protein_coding	ARNTL2	1	OTTHUMG00000169257.2	chr12	HAVANA	gene	27332854	27425289	+	-0.435038	0.739675	6.86078	-3.51985	0.00261732	0.0367337	-2.45968
ENSG00000159214.12	protein_coding	CCDC24	2	OTTHUMG00000008299.4	chr1	HAVANA	gene	43991359	43996528	+	0.750147	1.68196	3.62578	3.30689	0.00415266	0.0500686	-2.46235
ENSG00000242265.5	protein_coding	PEG10	2	OTTHUMG00000155578.5	chr7	HAVANA	gene	94656325	94669695	+	0.797483	1.73807	4.04694	3.35051	0.00377869	0.0468954	-2.46267
ENSG00000186470.13	protein_coding	BTN3A2	2	OTTHUMG00000014450.6	chr6	HAVANA	gene	26365159	26378320	+	0.618415	1.53519	5.0075	3.42136	0.003241	0.0420976	-2.46422
ENSG00000012822.15	protein_coding	CALCOCO1	1	OTTHUMG00000170095.4	chr12	HAVANA	gene	53708517	53727745	-	1.44879	2.72978	1.30314	3.00331	0.00797585	0.0788853	-2.46527
ENSG00000117595.11	protein_coding	IRF6	2	OTTHUMG00000036521.3	chr1	HAVANA	gene	209785623	209806175	-	2.78869	6.91	-1.08439	2.95821	0.00878092	0.0841669	-2.46642
ENSG00000253457.2	protein_coding	SMIM18	2	OTTHUMG00000163839.1	chr8	HAVANA	gene	30638600	30646064	+	0.497079	1.41135	4.4094	3.37314	0.00359804	0.045209	-2.47409
ENSG00000157216.15	protein_coding	SSBP3	2	OTTHUMG00000008264.5	chr1	HAVANA	gene	54225432	54413479	-	0.551382	1.46549	5.49787	3.45387	0.00302039	0.040412	-2.47421
ENSG00000163479.13	protein_coding	SSR2	1	OTTHUMG00000017456.3	chr1	HAVANA	gene	156009048	156020959	-	-0.428218	0.743179	8.70556	-3.55078	0.00244725	0.0348389	-2.47465
ENSG00000107104.18	protein_coding	KANK1	2	OTTHUMG00000019434.6	chr9	HAVANA	gene	470291	746106	+	0.711445	1.63744	3.36174	3.25184	0.00467701	0.0541233	-2.4747
ENSG00000131015.4	protein_coding	ULBP2	2	OTTHUMG00000015803.1	chr6	HAVANA	gene	149942000	149949235	+	-0.737732	0.599681	3.07888	-3.27397	0.00445884	0.0522888	-2.48491
ENSG00000079156.16	protein_coding	OSBPL6	2	OTTHUMG00000132579.4	chr2	HAVANA	gene	178194481	178402891	+	-0.742317	0.597778	3.19104	-3.29216	0.00428699	0.0510364	-2.4869
ENSG00000102010.14	protein_coding	BMX	2	OTTHUMG00000021180.1	chrX	HAVANA	gene	15464246	15556529	+	-1.96178	0.256711	-0.582353	-2.95059	0.00892448	0.0852142	-2.48733
ENSG00000270607.1	lincRNA	RP11-359E10.1	2	OTTHUMG00000185180.1	chr11	HAVANA	gene	19710934	19712619	-	-1.11631	0.461272	1.08741	-3.04495	0.00729658	0.0741852	-2.49106
ENSG00000255224.1	antisense	CTD-3065J16.9	2	OTTHUMG00000165436.1	chr8	HAVANA	gene	144078002	144079265	-	-1.3277	0.398403	0.836449	-3.03488	0.00745556	0.075288	-2.49122
ENSG00000157483.8	protein_coding	MYO1E	1	OTTHUMG00000171944.3	chr15	HAVANA	gene	59132434	59372900	-	-0.529574	0.692759	5.32858	-3.44005	0.00311231	0.0411273	-2.4929
ENSG00000143498.17	protein_coding	TAF1A	2	OTTHUMG00000037544.3	chr1	HAVANA	gene	222557902	222589933	-	-0.720682	0.606811	2.59287	-3.21287	0.00508717	0.0574426	-2.49546
ENSG00000250899.3	lincRNA	RP11-253E3.3	2	OTTHUMG00000168179.2	chr12	HAVANA	gene	3041437	3044950	+	-0.912072	0.531421	2.11964	-3.12312	0.00617081	0.0660334	-2.49632
ENSG00000159110.19	protein_coding	IFNAR2	2	OTTHUMG00000065127.39	chr21	HAVANA	gene	33229901	33265675	+	0.741996	1.67249	3.73061	3.32055	0.00403174	0.0490156	-2.49742
ENSG00000167984.17	protein_coding	NLRC3	2	OTTHUMG00000177561.6	chr16	HAVANA	gene	3539033	3577400	-	1.49266	2.81407	0.507833	2.97338	0.00850157	0.0825605	-2.50087
ENSG00000207296.1	snRNA	RNU6-140P	3	NA	chr19	ENSEMBL	gene	38797002	38797109	-	1.57752	2.98457	-0.464132	2.93418	0.00924146	0.0871797	-2.50101
ENSG00000141570.10	protein_coding	CBX8	2	OTTHUMG00000150416.3	chr17	HAVANA	gene	79792132	79801683	-	0.888242	1.85092	2.4629	3.16447	0.00564606	0.0619694	-2.50686
ENSG00000163346.16	protein_coding	PBXIP1	2	OTTHUMG00000037369.5	chr1	HAVANA	gene	154944076	154956123	-	0.730156	1.65882	3.68729	3.27678	0.00443182	0.0520538	-2.50878
ENSG00000154957.13	protein_coding	ZNF18	1	OTTHUMG00000178307.5	chr17	HAVANA	gene	11977439	11997510	-	1.48644	2.80197	1.45609	3.0148	0.00778248	0.0776425	-2.51151
ENSG00000125753.13	protein_coding	VASP	2	OTTHUMG00000182124.2	chr19	HAVANA	gene	45506579	45526983	+	-0.493902	0.710102	6.28475	-3.47396	0.00289153	0.0394673	-2.51437
ENSG00000275074.1	protein_coding	NUDT18	2	OTTHUMG00000163774.5	chr8	HAVANA	gene	22106872	22109419	-	0.953166	1.93612	2.68285	3.15744	0.005732	0.0624072	-2.51567
ENSG00000144355.14	protein_coding	DLX1	1	OTTHUMG00000073951.4	chr2	HAVANA	gene	172084740	172089677	+	-0.419506	0.747681	4.98341	-3.41509	0.00328539	0.0423972	-2.51928
ENSG00000137261.13	protein_coding	KIAA0319	2	OTTHUMG00000014358.1	chr6	HAVANA	gene	24544104	24646155	-	0.73289	1.66197	2.86099	3.21041	0.00511422	0.0576171	-2.52519
ENSG00000134684.10	protein_coding	YARS	2	OTTHUMG00000003933.2	chr1	HAVANA	gene	32775237	32818153	-	-0.507592	0.703396	7.79415	-3.50577	0.00269858	0.0376262	-2.52936
ENSG00000143390.17	protein_coding	RFX5	1	OTTHUMG00000012495.24	chr1	HAVANA	gene	151340640	151347357	-	0.691073	1.61448	3.97799	3.29421	0.00426808	0.0508926	-2.53306
ENSG00000103599.19	protein_coding	IQCH	1	OTTHUMG00000133231.6	chr15	HAVANA	gene	67254800	67502260	+	-0.927104	0.525913	1.78198	-3.11494	0.00628021	0.0666714	-2.54081
ENSG00000215039.6	processed_transcript	CD27-AS1	2	OTTHUMG00000168315.2	chr12	HAVANA	gene	6439001	6451567	-	0.662845	1.5832	4.11694	3.29577	0.0042537	0.0508024	-2.54188
ENSG00000106853.18	protein_coding	PTGR1	2	OTTHUMG00000020493.7	chr9	HAVANA	gene	111549722	111599855	-	0.531133	1.44506	9.96359	3.53746	0.00251913	0.0355564	-2.54356
ENSG00000272008.1	antisense	RP11-393I2.4	2	OTTHUMG00000185794.1	chr6	HAVANA	gene	87151159	87155285	-	1.60602	3.04411	0.142476	2.92343	0.00945504	0.0885222	-2.5486
ENSG00000127507.17	protein_coding	ADGRE2	1	OTTHUMG00000183408.3	chr19	HAVANA	gene	14732393	14778541	-	-1.01164	0.495981	0.905987	-3.01333	0.00780701	0.077783	-2.54945
ENSG00000169410.9	protein_coding	PTPN9	2	OTTHUMG00000142838.3	chr15	HAVANA	gene	75463251	75579289	-	-0.54087	0.687356	5.06177	-3.39972	0.00339665	0.0434568	-2.54978
ENSG00000272843.1	antisense	RP11-313P13.5	2	OTTHUMG00000186270.1	chr7	HAVANA	gene	72924418	72925125	-	1.45403	2.73972	-0.278951	2.92434	0.00943687	0.088453	-2.55062
ENSG00000003402.19	protein_coding	CFLAR	1	OTTHUMG00000132819.19	chr2	HAVANA	gene	201116104	201176687	+	-0.596989	0.661132	4.62968	-3.35894	0.00371033	0.0462935	-2.55083
ENSG00000233559.1	lincRNA	AC016831.7	2	OTTHUMG00000155022.1	chr7	HAVANA	gene	130853720	130928649	+	-2.06263	0.23938	-0.522738	-2.90097	0.0099169	0.0913976	-2.55478
ENSG00000214530.8	protein_coding	STARD10	1	OTTHUMG00000167954.3	chr11	HAVANA	gene	72754729	72794168	-	0.588128	1.50329	3.90318	3.30952	0.00412911	0.0499548	-2.55493
ENSG00000128512.20	protein_coding	DOCK4	1	OTTHUMG00000155077.7	chr7	HAVANA	gene	111726110	112206411	-	-1.0198	0.493185	3.07842	-3.23258	0.00487552	0.0558138	-2.55539
ENSG00000182718.16	protein_coding	ANXA2	1	OTTHUMG00000132763.5	chr15	HAVANA	gene	60347134	60402883	-	0.488587	1.40307	11.1045	3.54256	0.00249136	0.0352647	-2.56109
ENSG00000125731.12	protein_coding	SH2D3A	2	OTTHUMG00000181868.2	chr19	HAVANA	gene	6752160	6767588	-	1.98509	3.95886	0.55099	2.91499	0.00962616	0.0895059	-2.56131
ENSG00000145681.10	protein_coding	HAPLN1	2	OTTHUMG00000119045.5	chr5	HAVANA	gene	83637805	83721613	-	-2.06263	0.23938	0.491596	-2.89564	0.0100297	0.0918384	-2.56402
ENSG00000172663.8	protein_coding	TMEM134	2	OTTHUMG00000168034.4	chr11	HAVANA	gene	67461710	67469272	-	0.381772	1.30294	7.10248	3.47191	0.00290441	0.0395705	-2.56471
ENSG00000233521.5	lincRNA	RP5-1172A22.1	1	OTTHUMG00000150955.1	chr22	HAVANA	gene	27221349	27224727	-	1.14135	2.20587	1.94225	3.04953	0.00722552	0.0736638	-2.56804
ENSG00000156475.18	protein_coding	PPP2R2B	1	OTTHUMG00000163381.10	chr5	HAVANA	gene	146581146	147084784	-	0.72174	1.64917	2.83298	3.18727	0.00537559	0.0597934	-2.57075
ENSG00000106211.8	protein_coding	HSPB1	2	OTTHUMG00000023228.3	chr7	HAVANA	gene	76302544	76304295	+	0.529811	1.44374	10.1184	3.52086	0.00261161	0.036688	-2.57626
ENSG00000162591.15	protein_coding	MEGF6	2	OTTHUMG00000000611.7	chr1	HAVANA	gene	3489920	3611495	-	1.83339	3.56374	0.356932	2.89698	0.0100012	0.0916775	-2.57986
ENSG00000124508.16	protein_coding	BTN2A2	1	OTTHUMG00000014452.4	chr6	HAVANA	gene	26383096	26394874	+	0.547216	1.46126	3.81946	3.28275	0.00437506	0.0516721	-2.58281
ENSG00000276850.4	lincRNA	CH17-360D5.2	2	OTTHUMG00000189091.2	chr10	HAVANA	gene	47908064	47991850	-	2.63067	6.19313	-0.91996	2.90473	0.00983807	0.0909092	-2.58464
ENSG00000171462.14	protein_coding	DLK2	2	OTTHUMG00000014735.2	chr6	HAVANA	gene	43450352	43456632	-	-1.89511	0.268853	-0.960494	-2.89869	0.009965	0.0915711	-2.58469
ENSG00000131381.12	protein_coding	RBSN	2	OTTHUMG00000129860.7	chr3	HAVANA	gene	15070073	15099163	-	-0.506854	0.703755	4.03346	-3.28871	0.00431905	0.0512952	-2.58662
ENSG00000255327.1	lincRNA	RP11-555G19.1	2	OTTHUMG00000167185.1	chr11	HAVANA	gene	134950708	134951568	+	0.856958	1.81121	2.7196	3.19127	0.0053295	0.0594583	-2.58773
ENSG00000172331.11	protein_coding	BPGM	2	OTTHUMG00000155380.2	chr7	HAVANA	gene	134646808	134679813	+	-0.491427	0.711321	4.66019	-3.34455	0.00382778	0.0473178	-2.58868
ENSG00000128510.10	protein_coding	CPA4	1	OTTHUMG00000157825.4	chr7	HAVANA	gene	130293134	130324180	+	1.0745	2.10599	2.39575	3.08194	0.00674093	0.0700653	-2.5931
ENSG00000132432.13	protein_coding	SEC61G	2	OTTHUMG00000023430.3	chr7	HAVANA	gene	54752250	54759974	-	-0.609985	0.655203	6.25869	-3.43767	0.00312838	0.0412113	-2.59369
ENSG00000105497.7	protein_coding	ZNF175	1	OTTHUMG00000167771.4	chr19	HAVANA	gene	51571298	51592508	+	-0.986099	0.504841	2.08129	-3.10181	0.00645963	0.068043	-2.59384
ENSG00000203867.7	protein_coding	RBM20	2	OTTHUMG00000019043.5	chr10	HAVANA	gene	110644397	110839469	+	0.590738	1.50602	3.84185	3.26015	0.00459392	0.0532859	-2.59954
ENSG00000179528.15	protein_coding	LBX2	1	OTTHUMG00000170595.5	chr2	HAVANA	gene	74497517	74503316	-	0.974687	1.96521	2.19397	3.06751	0.00695267	0.0715673	-2.5999
ENSG00000119655.10	protein_coding	NPC2	1	OTTHUMG00000171212.2	chr14	HAVANA	gene	74476192	74494177	-	-0.522148	0.696334	4.90936	-3.37823	0.00355853	0.0450254	-2.60299
ENSG00000108963.17	protein_coding	DPH1	2	OTTHUMG00000177724.7	chr17	HAVANA	gene	2030110	2043430	+	-1.40107	0.378648	0.511727	-2.95369	0.00886569	0.0847614	-2.60735
ENSG00000205356.9	protein_coding	TECPR1	2	OTTHUMG00000154273.6	chr7	HAVANA	gene	98214624	98252251	-	-0.598844	0.660283	4.21355	-3.2837	0.0043661	0.0516072	-2.60855
ENSG00000027075.14	protein_coding	PRKCH	1	OTTHUMG00000152341.6	chr14	HAVANA	gene	61187559	61550976	+	-1.57363	0.335962	0.15434	-2.94035	0.00912096	0.0865044	-2.60996
ENSG00000183778.17	protein_coding	B3GALT5	2	OTTHUMG00000086725.3	chr21	HAVANA	gene	39556442	39673137	+	-2.36816	0.193693	-1.35937	-2.86993	0.0105914	0.0948891	-2.61075
ENSG00000279479.1	TEC	RP11-91I8.2	2	OTTHUMG00000178469.1	chr18	HAVANA	gene	6727053	6728981	+	1.65118	3.14091	0.505858	2.88513	0.0102557	0.0929299	-2.61381
ENSG00000169908.11	protein_coding	TM4SF1	2	OTTHUMG00000159597.1	chr3	HAVANA	gene	149369022	149377865	-	-0.443411	0.735394	8.18971	-3.47797	0.00286645	0.0393049	-2.61409
ENSG00000171848.14	protein_coding	RRM2	2	OTTHUMG00000185555.3	chr2	HAVANA	gene	10120698	10131419	+	-0.618224	0.651472	7.54499	-3.47515	0.00288409	0.0394379	-2.62125
ENSG00000125898.12	protein_coding	FAM110A	2	OTTHUMG00000031649.3	chr20	HAVANA	gene	833715	857463	+	-0.831238	0.562047	2.18634	-3.11248	0.0063135	0.0668818	-2.62142
ENSG00000008282.8	protein_coding	SYPL1	1	OTTHUMG00000157587.2	chr7	HAVANA	gene	106090503	106112576	-	-0.589479	0.664583	6.22522	-3.42754	0.0031979	0.041665	-2.62453
ENSG00000170779.10	protein_coding	CDCA4	2	OTTHUMG00000170767.1	chr14	HAVANA	gene	105009573	105021148	-	-0.467218	0.723358	6.23152	-3.4253	0.00321341	0.0418305	-2.63071
ENSG00000160445.10	protein_coding	ZER1	2	OTTHUMG00000020759.2	chr9	HAVANA	gene	128729786	128772414	-	0.779101	1.71606	3.33175	3.18447	0.0054082	0.0600217	-2.63123
ENSG00000273820.1	protein_coding	USP27X	2	OTTHUMG00000189037.1	chrX	HAVANA	gene	49879948	49882565	+	2.64593	6.25898	-0.61352	2.86658	0.0106666	0.095258	-2.63164
ENSG00000068383.18	protein_coding	INPP5A	2	OTTHUMG00000019293.5	chr10	HAVANA	gene	132537820	132783480	+	-0.937296	0.522211	2.1667	-3.09181	0.00659976	0.0691282	-2.63281
ENSG00000113389.15	protein_coding	NPR3	1	OTTHUMG00000150316.9	chr5	HAVANA	gene	32689070	32791724	+	-0.621314	0.650078	3.54065	-3.23836	0.00481512	0.0552072	-2.63413
ENSG00000260572.1	antisense	RP11-16N11.2	2	OTTHUMG00000175842.1	chr3	HAVANA	gene	160753428	160755142	-	-2.00874	0.24849	-0.731729	-2.85942	0.0108295	0.0961938	-2.63846
ENSG00000168071.21	protein_coding	CCDC88B	2	OTTHUMG00000045419.5	chr11	HAVANA	gene	64340223	64357534	+	0.751547	1.6836	2.84874	3.12295	0.00617314	0.0660334	-2.64078
ENSG00000115194.10	protein_coding	SLC30A3	1	OTTHUMG00000128409.4	chr2	HAVANA	gene	27253684	27275817	-	1.28675	2.43977	1.27754	2.97817	0.00841518	0.0820584	-2.64777
ENSG00000236859.6	antisense	NIFK-AS1	1	OTTHUMG00000153332.4	chr2	HAVANA	gene	121649650	121728481	+	0.681387	1.60368	2.73668	3.13199	0.00605437	0.0651555	-2.64849
ENSG00000115758.12	protein_coding	ODC1	2	OTTHUMG00000090450.4	chr2	HAVANA	gene	10439968	10448504	-	-0.460629	0.726669	8.78643	-3.46709	0.00293498	0.0397328	-2.65283
ENSG00000182492.15	protein_coding	BGN	2	OTTHUMG00000024205.4	chrX	HAVANA	gene	153494939	153509554	+	0.991408	1.98812	2.13074	3.0392	0.00738689	0.074899	-2.65513
ENSG00000129657.14	protein_coding	SEC14L1	1	OTTHUMG00000177311.13	chr17	HAVANA	gene	77086716	77217101	+	-0.481937	0.716016	6.23858	-3.4075	0.0033399	0.0429567	-2.65582
ENSG00000169184.5	protein_coding	MN1	2	OTTHUMG00000150975.1	chr22	HAVANA	gene	27748277	27801498	-	1.44538	2.72335	0.827596	2.8827	0.0103087	0.093178	-2.6567
ENSG00000165698.15	protein_coding	C9orf9	2	OTTHUMG00000020847.1	chr9	HAVANA	gene	132878027	132890201	+	0.708402	1.63399	3.20014	3.16012	0.00569907	0.0623228	-2.65996
ENSG00000125398.6	protein_coding	SOX9	2	OTTHUMG00000166300.2	chr17	HAVANA	gene	72121020	72126420	+	0.752321	1.6845	5.07701	3.3452	0.00382238	0.0473178	-2.6617
ENSG00000173418.11	protein_coding	NAA20	1	OTTHUMG00000031998.4	chr20	HAVANA	gene	20017116	20033655	+	-0.451573	0.731245	7.87647	-3.45141	0.00303654	0.0405189	-2.66203
ENSG00000071462.11	protein_coding	WBSCR22	2	OTTHUMG00000023306.4	chr7	HAVANA	gene	73683025	73705161	+	-0.459455	0.727261	7.97764	-3.45286	0.00302697	0.0404478	-2.66219
ENSG00000197568.13	protein_coding	HHLA3	1	OTTHUMG00000009346.4	chr1	HAVANA	gene	70354805	70385339	+	1.24573	2.37139	1.51896	2.9308	0.0093082	0.0875875	-2.66286
ENSG00000231952.3	unprocessed_pseudogene	AC018648.5	2	OTTHUMG00000152927.2	chr7	HAVANA	gene	32812757	32838570	+	1.28446	2.43592	-0.657317	2.86832	0.0106275	0.0950795	-2.66445
ENSG00000140545.14	protein_coding	MFGE8	1	OTTHUMG00000148682.8	chr15	HAVANA	gene	88898683	88913411	-	0.863952	1.82002	2.60518	3.12288	0.006174	0.0660334	-2.66571
ENSG00000267397.1	lincRNA	RP11-873E20.1	2	OTTHUMG00000176165.1	chr18	HAVANA	gene	35716370	35717978	+	-2.16321	0.22326	-1.27173	-2.8395	0.0112955	0.0987449	-2.66651
ENSG00000099260.10	protein_coding	PALMD	2	OTTHUMG00000010764.2	chr1	HAVANA	gene	99645943	99694541	+	1.20728	2.30902	1.28412	2.90399	0.00985365	0.0909967	-2.66693
ENSG00000145794.16	protein_coding	MEGF10	1	OTTHUMG00000128984.3	chr5	HAVANA	gene	127290831	127465737	+	-1.50307	0.352802	-0.873187	-2.88496	0.0102595	0.0929299	-2.66963
ENSG00000160072.19	protein_coding	ATAD3B	2	OTTHUMG00000000577.5	chr1	HAVANA	gene	1471769	1497848	+	-0.571794	0.67278	5.78677	-3.37117	0.0036134	0.0453348	-2.67223
ENSG00000232079.6	processed_transcript	AL035610.1	2	OTTHUMG00000078709.4	chr21	HAVANA	gene	28048404	28137611	+	1.60119	3.03394	1.76363	2.94704	0.00899217	0.0856411	-2.67593
ENSG00000183160.8	protein_coding	TMEM119	2	OTTHUMG00000169410.3	chr12	HAVANA	gene	108589846	108598320	-	0.810003	1.75321	4.76084	3.30585	0.00416202	0.0500686	-2.6809
ENSG00000258245.1	processed_pseudogene	RP11-114H23.3	2	OTTHUMG00000169778.1	chr12	HAVANA	gene	75688794	75689096	-	-2.01564	0.247304	-1.3765	-2.82683	0.0116019	0.100773	-2.68232
ENSG00000133106.14	protein_coding	EPSTI1	2	OTTHUMG00000016814.4	chr13	HAVANA	gene	42886388	42992271	-	1.5084	2.84495	0.969582	2.85867	0.0108468	0.0962334	-2.68307
ENSG00000154096.13	protein_coding	THY1	1	OTTHUMG00000166202.4	chr11	HAVANA	gene	119417378	119424985	-	-1.38316	0.383379	-0.00408754	-2.86588	0.0106826	0.0952748	-2.68597
ENSG00000177732.8	protein_coding	SOX12	2	OTTHUMG00000031623.4	chr20	HAVANA	gene	325595	330224	+	0.496246	1.41054	4.92178	3.30592	0.00416139	0.0500686	-2.68967
ENSG00000044446.11	protein_coding	PHKA2	2	OTTHUMG00000021222.2	chrX	HAVANA	gene	18892300	18984598	-	0.581551	1.49646	4.86588	3.30851	0.00413814	0.0500235	-2.69202
ENSG00000104219.12	protein_coding	ZDHHC2	2	OTTHUMG00000163860.4	chr8	HAVANA	gene	17156029	17224799	+	0.663689	1.58413	4.88303	3.31114	0.00411469	0.0498209	-2.69234
ENSG00000075568.16	protein_coding	TMEM131	1	OTTHUMG00000153061.9	chr2	HAVANA	gene	97756333	97995891	-	-0.580001	0.668963	5.73034	-3.37534	0.00358093	0.045209	-2.69743
ENSG00000197405.7	protein_coding	C5AR1	2	OTTHUMG00000183504.3	chr19	HAVANA	gene	47290023	47322066	+	2.62997	6.19011	-1.04568	2.82461	0.0116563	0.10101	-2.69873
ENSG00000274270.1	sense_intronic	RP11-34F20.7	2	OTTHUMG00000187356.1	chr13	HAVANA	gene	50125816	50128463	+	1.90246	3.73849	-1.43583	2.82075	0.0117516	0.101539	-2.69929
ENSG00000204439.3	protein_coding	C6orf47	2	OTTHUMG00000031172.1	chr6	HAVANA	gene	31658298	31660772	-	-1.57014	0.336775	-0.294535	-2.84574	0.0111475	0.0980256	-2.70504
ENSG00000151929.9	protein_coding	BAG3	2	OTTHUMG00000019155.2	chr10	HAVANA	gene	119651370	119677819	+	-0.479975	0.71699	7.40479	-3.41832	0.00326241	0.0421762	-2.71118
ENSG00000110435.11	protein_coding	PDHX	1	OTTHUMG00000166491.3	chr11	HAVANA	gene	34915829	35020591	+	-0.383066	0.766806	5.7846	-3.36496	0.00366233	0.0457945	-2.71384
ENSG00000166822.12	protein_coding	TMEM170A	1	OTTHUMG00000137614.3	chr16	HAVANA	gene	75443054	75465497	-	-0.447283	0.733423	5.01978	-3.32282	0.00401201	0.0488155	-2.715
ENSG00000184363.9	protein_coding	PKP3	2	OTTHUMG00000119068.7	chr11	HAVANA	gene	392614	404908	+	0.737557	1.66735	3.87225	3.19882	0.0052436	0.0586756	-2.71507
ENSG00000254266.5	lincRNA	RP11-594N15.2	2	OTTHUMG00000164617.1	chr8	HAVANA	gene	78426103	78558503	-	-2.35512	0.195452	-1.35536	-2.80645	0.0121113	0.103492	-2.71527
ENSG00000117410.13	protein_coding	ATP6V0B	2	OTTHUMG00000008298.3	chr1	HAVANA	gene	43974487	43978295	+	-0.368197	0.77475	7.66855	-3.4183	0.00326261	0.0421762	-2.71809
ENSG00000143375.14	protein_coding	CGN	2	OTTHUMG00000012497.16	chr1	HAVANA	gene	151510510	151538692	+	1.47843	2.78645	0.379739	2.85913	0.0108363	0.096197	-2.71858
ENSG00000172824.14	protein_coding	CES4A	2	OTTHUMG00000167866.4	chr16	HAVANA	gene	66988589	67009758	+	1.74603	3.35435	-0.0653586	2.81618	0.0118655	0.101993	-2.72065
ENSG00000034239.10	protein_coding	EFCAB1	2	OTTHUMG00000164203.3	chr8	HAVANA	gene	48710789	48735311	-	1.41546	2.66744	0.372023	2.85491	0.0109334	0.0968289	-2.72106
ENSG00000273723.1	lincRNA	RP11-93H24.3	2	OTTHUMG00000187324.1	chr13	HAVANA	gene	52651305	52652279	-	1.04597	2.06475	1.81012	2.98642	0.00826849	0.0810268	-2.72366
ENSG00000213977.7	protein_coding	TAX1BP3	2	OTTHUMG00000090701.2	chr17	HAVANA	gene	3662896	3668682	-	0.464999	1.38032	4.61174	3.27041	0.00449321	0.052609	-2.73052
ENSG00000124635.8	protein_coding	HIST1H2BJ	2	OTTHUMG00000014470.4	chr6	HAVANA	gene	27125897	27132750	-	-0.90174	0.535241	2.55067	-3.11343	0.00630064	0.066793	-2.73173
ENSG00000182809.10	protein_coding	CRIP2	1	OTTHUMG00000029906.5	chr14	HAVANA	gene	105472962	105480170	+	1.03958	2.05563	3.31232	3.07666	0.00681769	0.0705189	-2.73547
ENSG00000172346.14	protein_coding	CSDC2	1	OTTHUMG00000150967.4	chr22	HAVANA	gene	41560763	41577741	+	1.97067	3.91951	1.03873	2.8726	0.0105317	0.0945631	-2.73893
ENSG00000060140.8	protein_coding	STYK1	2	OTTHUMG00000168408.3	chr12	HAVANA	gene	10618939	10674318	-	1.11833	2.17095	1.85458	2.93628	0.00920029	0.0868463	-2.73922
ENSG00000269526.1	protein_coding	ERVV-1	2	OTTHUMG00000182942.1	chr19	HAVANA	gene	53013921	53016122	+	3.2071	9.23492	-1.67256	2.79535	0.0123979	0.104935	-2.74091
ENSG00000228451.3	transcribed_processed_pseudogene	RP11-722A15.2	1	OTTHUMG00000163945.1	chr8	HAVANA	gene	26379259	26382953	-	1.57132	2.97176	-0.285223	2.81026	0.0120144	0.102917	-2.74197
ENSG00000169241.17	protein_coding	SLC50A1	2	OTTHUMG00000035333.2	chr1	HAVANA	gene	155135344	155138857	+	0.535362	1.44931	4.48512	3.24826	0.0047133	0.0543324	-2.74325
ENSG00000151689.12	protein_coding	INPP1	2	OTTHUMG00000132672.6	chr2	HAVANA	gene	190343470	190371665	+	-0.511865	0.701315	4.97195	-3.30514	0.00416841	0.050105	-2.74607
ENSG00000179673.4	protein_coding	RPRML	2	OTTHUMG00000178187.1	chr17	HAVANA	gene	46978156	46979248	-	-1.25424	0.419215	1.36752	-2.94356	0.0090589	0.0861665	-2.74667
ENSG00000178199.13	protein_coding	ZC3H12D	1	OTTHUMG00000015786.5	chr6	HAVANA	gene	149446795	149485061	-	-1.3983	0.379375	0.107517	-2.87039	0.0105811	0.0948891	-2.74709
ENSG00000267301.1	processed_pseudogene	RPL23AP77	1	OTTHUMG00000158183.2	chr18	HAVANA	gene	23709825	23710287	-	2.69706	6.48477	-0.463821	2.7865	0.0126312	0.106232	-2.74723
ENSG00000128274.16	protein_coding	A4GALT	2	OTTHUMG00000150744.6	chr22	HAVANA	gene	42692112	42721298	-	-0.594288	0.662371	3.80221	-3.20106	0.0052183	0.0585242	-2.75531
ENSG00000279766.1	TEC	RP11-642A1.2	2	OTTHUMG00000164220.1	chr8	HAVANA	gene	140572142	140572812	-	-1.54283	0.343212	-0.59434	-2.79883	0.0123073	0.104465	-2.7555
ENSG00000115594.11	protein_coding	IL1R1	1	OTTHUMG00000130783.5	chr2	HAVANA	gene	102064544	102179874	+	-0.880225	0.543283	3.56347	-3.23167	0.00488512	0.0558808	-2.7604
ENSG00000115271.10	protein_coding	GCA	1	OTTHUMG00000132057.9	chr2	HAVANA	gene	162318840	162371595	+	0.547251	1.4613	4.26329	3.21876	0.005023	0.0570079	-2.76156
ENSG00000157800.17	protein_coding	SLC37A3	1	OTTHUMG00000157343.5	chr7	HAVANA	gene	140293693	140404433	-	-0.917988	0.529246	3.51122	-3.17159	0.00556021	0.061298	-2.76195
ENSG00000151468.10	protein_coding	CCDC3	2	OTTHUMG00000017689.2	chr10	HAVANA	gene	12896625	13099652	-	0.568678	1.48316	5.85061	3.32754	0.00397128	0.0484386	-2.76205
ENSG00000253320.5	antisense	KB-1507C5.2	1	OTTHUMG00000164825.2	chr8	HAVANA	gene	102864300	102977876	+	1.12286	2.17778	1.50357	2.8807	0.0103525	0.0934325	-2.76223
ENSG00000156966.6	protein_coding	B3GNT7	1	OTTHUMG00000153880.1	chr2	HAVANA	gene	231395543	231401164	+	2.78869	6.91	-0.693047	2.77841	0.0128479	0.107402	-2.76249
ENSG00000127423.10	protein_coding	AUNIP	2	OTTHUMG00000007372.2	chr1	HAVANA	gene	25831913	25859458	-	-0.510095	0.702176	3.8518	-3.20988	0.00512004	0.0576391	-2.76286
ENSG00000236778.7	antisense	RP11-550E22.3	2	OTTHUMG00000016944.7	chr13	HAVANA	gene	51452367	51552364	+	1.0118	2.01643	1.62808	2.93253	0.00927405	0.0873765	-2.76318
ENSG00000235724.8	antisense	AC009299.2	1	OTTHUMG00000151884.5	chr2	HAVANA	gene	161222785	161308303	-	2.82346	7.07857	-0.881144	2.78252	0.0127373	0.106837	-2.76406
ENSG00000165886.4	protein_coding	UBTD1	2	OTTHUMG00000018856.1	chr10	HAVANA	gene	97498868	97571209	+	-0.633816	0.644469	3.71247	-3.18816	0.00536531	0.0597683	-2.76431
ENSG00000128591.15	protein_coding	FLNC	2	OTTHUMG00000023627.3	chr7	HAVANA	gene	128830377	128859274	+	0.540744	1.45472	6.56439	3.35822	0.00371611	0.0463116	-2.76647
ENSG00000247675.6	antisense	RP11-411D10.1	2	OTTHUMG00000166699.1	chr11	HAVANA	gene	46846412	46874396	+	1.26146	2.39739	0.841117	2.8442	0.0111838	0.0981142	-2.76769
ENSG00000224152.1	antisense	AC009506.1	1	OTTHUMG00000154041.1	chr2	HAVANA	gene	159615296	159617082	+	1.5268	2.88146	1.06225	2.92569	0.00940982	0.0883207	-2.77015
ENSG00000152583.12	protein_coding	SPARCL1	1	OTTHUMG00000130605.5	chr4	HAVANA	gene	87473335	87531061	-	0.700172	1.6247	3.44921	3.10009	0.00648364	0.0681514	-2.77143
ENSG00000123609.10	protein_coding	NMI	2	OTTHUMG00000131867.4	chr2	HAVANA	gene	151270465	151290057	-	0.443691	1.36008	6.22479	3.34369	0.00383491	0.0473565	-2.77323
ENSG00000102034.16	protein_coding	ELF4	2	OTTHUMG00000022390.2	chrX	HAVANA	gene	130064874	130110716	-	0.584377	1.49939	5.20835	3.29382	0.00427164	0.0508943	-2.77539
ENSG00000122971.8	protein_coding	ACADS	2	OTTHUMG00000169203.1	chr12	HAVANA	gene	120725735	120740008	+	0.60938	1.5256	3.67139	3.14526	0.00588416	0.0636916	-2.7758
ENSG00000273132.1	antisense	RP11-350J20.12	2	OTTHUMG00000186262.1	chr6	HAVANA	gene	149852462	149853192	+	-0.971757	0.509885	1.94601	-3.00074	0.00801965	0.0792133	-2.77791
ENSG00000197646.7	protein_coding	PDCD1LG2	2	OTTHUMG00000019504.2	chr9	HAVANA	gene	5510570	5571254	+	-2.13129	0.228254	-1.68861	-2.76861	0.0131153	0.108905	-2.77825
ENSG00000196544.7	protein_coding	BORCS6	2	OTTHUMG00000153930.1	chr17	HAVANA	gene	8188333	8190907	-	0.752429	1.68463	3.14292	3.10755	0.00638055	0.0673754	-2.77854
ENSG00000133056.13	protein_coding	PIK3C2B	2	OTTHUMG00000036101.4	chr1	HAVANA	gene	204422628	204494724	-	1.03978	2.05592	2.23349	3.02534	0.00760907	0.0763212	-2.77869
ENSG00000162496.8	protein_coding	DHRS3	2	OTTHUMG00000001885.5	chr1	HAVANA	gene	12567910	12617731	-	-0.567618	0.67473	6.0096	-3.34264	0.00384362	0.0474248	-2.77937
ENSG00000084731.14	protein_coding	KIF3C	1	OTTHUMG00000094797.4	chr2	HAVANA	gene	25926596	25982749	-	0.503517	1.41767	4.69513	3.26408	0.00455505	0.0530829	-2.77968
ENSG00000187187.13	protein_coding	ZNF546	2	OTTHUMG00000182578.7	chr19	HAVANA	gene	39984134	40021041	+	0.758412	1.69163	2.76162	3.04815	0.00724687	0.0738308	-2.78401
ENSG00000120217.13	protein_coding	CD274	2	OTTHUMG00000019503.2	chr9	HAVANA	gene	5450503	5470566	+	-1.53248	0.345683	0.361447	-2.82188	0.0117236	0.101358	-2.78679
ENSG00000272905.1	lincRNA	RP11-265E18.1	2	OTTHUMG00000186216.1	chr7	HAVANA	gene	32845394	32846061	+	1.69911	3.247	-0.2341	2.78609	0.012642	0.106232	-2.78757
ENSG00000178935.5	protein_coding	ZNF552	1	OTTHUMG00000183478.1	chr19	HAVANA	gene	57803841	57814913	-	0.747922	1.67937	2.50817	3.04049	0.00736654	0.0747435	-2.78939
ENSG00000096092.5	protein_coding	TMEM14A	2	OTTHUMG00000014856.1	chr6	HAVANA	gene	52671109	52686588	+	0.398527	1.31816	7.24301	3.3764	0.00357267	0.0451659	-2.79035
ENSG00000240849.10	protein_coding	TMEM189	2	OTTHUMG00000152625.4	chr20	HAVANA	gene	50118254	50153734	-	0.418126	1.33619	5.94477	3.32649	0.00398026	0.0485014	-2.7909
ENSG00000205871.5	processed_pseudogene	RPS3AP47	1	OTTHUMG00000157905.1	chr15	HAVANA	gene	43115702	43116493	-	-2.11261	0.231228	-1.03337	-2.77676	0.0128927	0.107576	-2.79149
ENSG00000263050.1	lincRNA	RP11-667K14.3	2	OTTHUMG00000177680.1	chr17	HAVANA	gene	2043475	2044968	-	-1.40589	0.377385	-0.1199	-2.7935	0.0124464	0.105226	-2.79259
ENSG00000071539.13	protein_coding	TRIP13	1	OTTHUMG00000090349.27	chr5	HAVANA	gene	892643	919357	+	-0.368523	0.774575	7.19052	-3.37284	0.00360034	0.045209	-2.79348
ENSG00000185818.7	protein_coding	NAT8L	2	OTTHUMG00000121151.3	chr4	HAVANA	gene	2059512	2069089	+	-0.664488	0.630913	3.03789	-3.1074	0.00638269	0.0673754	-2.80132
ENSG00000261770.1	lincRNA	CTC-459F4.1	2	OTTHUMG00000175751.2	chr19	HAVANA	gene	27757184	27760849	-	1.51675	2.86146	0.998206	2.81443	0.0119093	0.102251	-2.80356
ENSG00000100664.10	protein_coding	EIF5	1	OTTHUMG00000171839.3	chr14	HAVANA	gene	103333544	103345025	+	-0.355387	0.78166	7.97409	-3.38597	0.00349941	0.044504	-2.80365
ENSG00000204219.9	protein_coding	TCEA3	2	OTTHUMG00000003233.3	chr1	HAVANA	gene	23381061	23424740	-	0.449393	1.36547	6.16905	3.32618	0.00398294	0.0485014	-2.80379
ENSG00000103064.13	protein_coding	SLC7A6	2	OTTHUMG00000176544.11	chr16	HAVANA	gene	68264516	68301823	+	-0.381016	0.767896	5.25934	-3.29723	0.00424025	0.0507638	-2.80553
ENSG00000078114.18	protein_coding	NEBL	2	OTTHUMG00000017788.6	chr10	HAVANA	gene	20779973	21174187	-	1.78577	3.44803	0.383565	2.78086	0.0127818	0.106969	-2.8076
ENSG00000215067.9	antisense	AC027763.2	1	OTTHUMG00000132903.8	chr17	HAVANA	gene	6876635	7012349	-	0.824427	1.77083	2.08486	2.97212	0.00852446	0.0827194	-2.81207
ENSG00000256683.6	protein_coding	ZNF350	1	OTTHUMG00000182538.3	chr19	HAVANA	gene	51964343	51986856	-	0.870237	1.82796	2.63953	2.99845	0.00805889	0.0795482	-2.81307
ENSG00000166821.8	protein_coding	PEX11A	1	OTTHUMG00000149809.5	chr15	HAVANA	gene	89677764	89690783	-	0.558126	1.47236	4.46849	3.22498	0.00495613	0.0565196	-2.81353
ENSG00000169220.17	protein_coding	RGS14	2	OTTHUMG00000163324.1	chr5	HAVANA	gene	177357837	177372601	+	0.760307	1.69385	3.2154	3.08638	0.00667706	0.0695955	-2.81392
ENSG00000227992.1	processed_pseudogene	AC108463.2	1	OTTHUMG00000153689.1	chr2	HAVANA	gene	111203964	111206215	-	-2.59014	0.16607	-1.34153	-2.7477	0.013704	0.112055	-2.81632
ENSG00000061918.12	protein_coding	GUCY1B3	1	OTTHUMG00000161698.17	chr4	HAVANA	gene	155758992	155807591	+	1.64097	3.11876	1.16554	2.87686	0.0104369	0.0938748	-2.8166
ENSG00000116774.11	protein_coding	OLFML3	2	OTTHUMG00000011980.2	chr1	HAVANA	gene	113979391	114035572	+	2.58499	6.00013	-0.985032	2.74379	0.013817	0.11266	-2.81929
ENSG00000128218.7	protein_coding	VPREB3	1	OTTHUMG00000150738.2	chr22	HAVANA	gene	23752743	23754468	-	2.01049	4.02918	0.133933	2.74526	0.0137743	0.112373	-2.8222
ENSG00000116922.14	protein_coding	C1orf109	2	OTTHUMG00000004323.6	chr1	HAVANA	gene	37681570	37692249	-	-0.424318	0.745191	6.01655	-3.31822	0.00405218	0.0492239	-2.82527
ENSG00000047936.10	protein_coding	ROS1	2	OTTHUMG00000016188.1	chr6	HAVANA	gene	117288300	117425855	-	2.63215	6.19947	-1.42747	2.74874	0.0136741	0.112055	-2.82834
ENSG00000106799.12	protein_coding	TGFBR1	2	OTTHUMG00000020353.6	chr9	HAVANA	gene	99104038	99154192	+	-0.637819	0.642684	4.2694	-3.21519	0.00506184	0.0572868	-2.83528
ENSG00000270882.2	protein_coding	HIST2H4A	2	OTTHUMG00000012189.8	chr1	HAVANA	gene	149832659	149839767	+	-1.31153	0.402892	0.438284	-2.80218	0.0122208	0.103849	-2.83599
ENSG00000108960.7	protein_coding	MMD	1	OTTHUMG00000177845.1	chr17	HAVANA	gene	55392613	55421992	-	-1.16812	0.445002	2.57258	-3.05503	0.00714085	0.0731006	-2.83622
ENSG00000148057.15	protein_coding	IDNK	1	OTTHUMG00000020105.6	chr9	HAVANA	gene	83623049	83644130	+	0.731778	1.66068	3.18432	3.03454	0.00746099	0.0752918	-2.83752
ENSG00000170558.8	protein_coding	CDH2	1	OTTHUMG00000059940.11	chr18	HAVANA	gene	27950966	28177446	-	-0.318643	0.801823	7.97691	-3.36671	0.00364848	0.045698	-2.83924
ENSG00000124067.16	protein_coding	SLC12A4	1	OTTHUMG00000137535.11	chr16	HAVANA	gene	67943474	67969601	-	-0.650761	0.636944	3.22041	-3.07711	0.006811	0.0704986	-2.84022
ENSG00000132825.6	protein_coding	PPP1R3D	2	OTTHUMG00000032876.2	chr20	HAVANA	gene	59936668	59940297	-	1.02067	2.02886	1.93636	2.94054	0.00911743	0.0865044	-2.84519
ENSG00000189362.11	protein_coding	NEMP2	1	OTTHUMG00000154454.2	chr2	HAVANA	gene	190504342	190534722	-	-1.03165	0.489149	2.12085	-2.97803	0.00841779	0.0820584	-2.8452
ENSG00000133104.12	protein_coding	SPG20	2	OTTHUMG00000016730.4	chr13	HAVANA	gene	36301638	36370180	-	-0.726675	0.604295	4.85815	-3.26976	0.0044996	0.0526423	-2.85155
ENSG00000213904.8	antisense	CTB-50E14.6	2	OTTHUMG00000182815.3	chr19	HAVANA	gene	42397128	42652355	+	1.13537	2.19674	1.87311	2.91932	0.00953802	0.0890196	-2.8646
ENSG00000168938.5	protein_coding	PPIC	2	OTTHUMG00000128921.2	chr5	HAVANA	gene	123023250	123036741	-	0.36664	1.28935	6.95912	3.3318	0.00393481	0.0481828	-2.86546
ENSG00000234840.1	lincRNA	RP11-399D6.2	2	OTTHUMG00000019696.1	chr9	HAVANA	gene	22646200	22824213	+	1.27285	2.41639	1.81914	2.89213	0.0101046	0.0922846	-2.86583
ENSG00000258053.1	lincRNA	CTD-2021H9.3	2	OTTHUMG00000169541.1	chr12	HAVANA	gene	71047402	71118247	-	1.87235	3.66129	-0.10821	2.72104	0.0144916	0.116003	-2.87182
ENSG00000198142.4	protein_coding	SOWAHC	2	OTTHUMG00000153219.1	chr2	HAVANA	gene	109614334	109618990	+	-0.789297	0.578626	3.63046	-3.11662	0.00625754	0.0665254	-2.87407
ENSG00000223764.2	lincRNA	RP11-54O7.3	2	OTTHUMG00000040718.2	chr1	HAVANA	gene	916865	921016	-	1.73322	3.3247	1.18161	2.76676	0.0131665	0.109177	-2.87415
ENSG00000113580.14	protein_coding	NR3C1	2	OTTHUMG00000129677.3	chr5	HAVANA	gene	143277931	143435512	-	0.587459	1.5026	5.18098	3.24742	0.0047219	0.0543894	-2.87596
ENSG00000239665.8	processed_transcript	RP11-295P9.3	2	OTTHUMG00000191439.1	chr10	HAVANA	gene	13631143	13668445	+	-1.18334	0.440331	0.978745	-2.86094	0.0107949	0.0959606	-2.87898
ENSG00000106536.19	protein_coding	POU6F2	1	OTTHUMG00000150803.8	chr7	HAVANA	gene	38977998	39493095	+	2.49806	5.64926	-1.0844	2.71018	0.0148247	0.117563	-2.88082
ENSG00000269113.3	protein_coding	TRABD2B	2	OTTHUMG00000007960.3	chr1	HAVANA	gene	47760528	47996895	-	2.50673	5.68332	-0.114711	2.70564	0.0149661	0.118277	-2.881
ENSG00000169379.15	protein_coding	ARL13B	2	OTTHUMG00000159012.4	chr3	HAVANA	gene	93980139	94055668	+	-0.939833	0.521293	2.19011	-2.96846	0.00859114	0.0830421	-2.88569
ENSG00000177181.14	protein_coding	RIMKLA	2	OTTHUMG00000007335.4	chr1	HAVANA	gene	42380795	42422578	+	1.78391	3.44359	-0.35598	2.70665	0.0149346	0.11809	-2.88589
ENSG00000171914.16	protein_coding	TLN2	1	OTTHUMG00000133679.4	chr15	HAVANA	gene	62390526	62844631	+	0.812871	1.7567	2.22771	2.94038	0.0091204	0.0865044	-2.89014
ENSG00000087086.14	protein_coding	FTL	2	OTTHUMG00000183332.1	chr19	HAVANA	gene	48965301	48966878	+	0.445677	1.36195	13.394	3.41863	0.00326027	0.0421762	-2.89134
ENSG00000165724.5	protein_coding	ZMYND19	2	OTTHUMG00000020992.1	chr9	HAVANA	gene	137582079	137590490	-	-0.505351	0.704489	5.51424	-3.26052	0.00459027	0.053285	-2.89143
ENSG00000197077.13	protein_coding	KIAA1671	2	OTTHUMG00000150841.9	chr22	HAVANA	gene	24952730	25197448	+	-0.702851	0.614357	3.59013	-3.1089	0.00636209	0.0672531	-2.89491
ENSG00000176142.12	protein_coding	TMEM39A	1	OTTHUMG00000159361.30	chr3	HAVANA	gene	119429500	119468830	-	-0.609718	0.655325	4.41834	-3.19786	0.0052544	0.0587523	-2.89772
ENSG00000105894.11	protein_coding	PTN	1	OTTHUMG00000155709.2	chr7	HAVANA	gene	137227341	137343865	-	0.741154	1.67151	3.50274	3.08828	0.00664983	0.0694574	-2.89781
ENSG00000013619.13	protein_coding	MAMLD1	2	OTTHUMG00000024157.5	chrX	HAVANA	gene	150361422	150514178	+	-0.620561	0.650418	2.55872	-3.01886	0.00771527	0.0771269	-2.8981
ENSG00000226803.7	antisense	RP11-203B9.4	2	OTTHUMG00000014917.4	chr6	HAVANA	gene	57114894	57174236	-	2.15906	4.46624	-0.740474	2.69586	0.0152749	0.120017	-2.90076
ENSG00000112667.12	protein_coding	DNPH1	2	OTTHUMG00000014724.2	chr6	HAVANA	gene	43225629	43229484	-	0.486672	1.40121	7.67943	3.32794	0.0039678	0.0484357	-2.90193
ENSG00000101400.5	protein_coding	SNTA1	2	OTTHUMG00000032259.2	chr20	HAVANA	gene	33407955	33443892	-	0.576461	1.49119	5.20064	3.22327	0.00497443	0.0565983	-2.90235
ENSG00000103021.9	protein_coding	CCDC113	1	OTTHUMG00000133489.3	chr16	HAVANA	gene	58231157	58283836	+	0.432257	1.34934	4.31595	3.16218	0.00567387	0.0621831	-2.90256
ENSG00000231028.8	lincRNA	LINC00271	2	OTTHUMG00000015632.2	chr6	HAVANA	gene	135497801	135716055	+	2.4005	5.27986	-0.948463	2.69096	0.0154321	0.120805	-2.90545
ENSG00000166073.10	protein_coding	GPR176	2	OTTHUMG00000129873.4	chr15	HAVANA	gene	39799032	39920892	-	0.388973	1.30946	6.76301	3.306	0.00416062	0.0500686	-2.9063
ENSG00000283355.1	TEC	RP11-739P1.3	2	OTTHUMG00000191879.1	chr4	HAVANA	gene	184014035	184016382	+	2.90051	7.46693	-1.81493	2.69593	0.0152728	0.120017	-2.90656
ENSG00000108788.11	protein_coding	MLX	2	OTTHUMG00000180246.2	chr17	HAVANA	gene	42567068	42573239	+	-0.629549	0.646379	3.21403	-3.07617	0.00682473	0.0705428	-2.90794
ENSG00000270179.1	sense_intronic	RP11-159N11.4	2	OTTHUMG00000184126.1	chr11	HAVANA	gene	113368478	113369117	+	1.23668	2.35655	0.610146	2.7645	0.013229	0.109483	-2.91317
ENSG00000121851.12	protein_coding	POLR3GL	2	OTTHUMG00000013739.3	chr1	HAVANA	gene	145964702	145978848	+	0.500767	1.41497	5.61511	3.25042	0.00469146	0.0542484	-2.9147
ENSG00000128923.10	protein_coding	FAM63B	2	OTTHUMG00000171983.2	chr15	HAVANA	gene	58771192	58861900	+	-0.535587	0.689878	4.65727	-3.18832	0.00536355	0.0597683	-2.91908
ENSG00000237945.7	antisense	LINC00649	1	OTTHUMG00000065819.10	chr21	HAVANA	gene	33915534	33977691	+	0.821131	1.76679	1.92688	2.90807	0.00976852	0.0904908	-2.92121
ENSG00000168404.12	protein_coding	MLKL	1	OTTHUMG00000177356.6	chr16	HAVANA	gene	74671855	74700960	-	-0.442863	0.735673	4.98093	-3.21983	0.00501148	0.0569428	-2.92167
ENSG00000115306.15	protein_coding	SPTBN1	2	OTTHUMG00000133746.6	chr2	HAVANA	gene	54456285	54671445	+	-0.547016	0.684434	5.00345	-3.21591	0.00505401	0.0572416	-2.9242
ENSG00000168646.12	protein_coding	AXIN2	1	OTTHUMG00000179353.3	chr17	HAVANA	gene	65528563	65561647	-	1.02083	2.02908	1.94259	2.88815	0.0101903	0.0926131	-2.92508
ENSG00000116962.14	protein_coding	NID1	2	OTTHUMG00000040071.2	chr1	HAVANA	gene	235975830	236065162	-	-0.400308	0.757697	6.01596	-3.27569	0.00444232	0.052136	-2.9261
ENSG00000114854.7	protein_coding	TNNC1	1	OTTHUMG00000158572.2	chr3	HAVANA	gene	52451102	52454070	-	2.86654	7.29313	-0.998597	2.68232	0.015713	0.122044	-2.92805
ENSG00000104549.11	protein_coding	SQLE	2	OTTHUMG00000164990.2	chr8	HAVANA	gene	124998497	125022283	+	0.636426	1.55447	6.68902	3.28832	0.00432272	0.0512979	-2.93214
ENSG00000107719.8	protein_coding	PALD1	2	OTTHUMG00000018411.2	chr10	HAVANA	gene	70478821	70568449	+	-1.1484	0.451126	1.26197	-2.8661	0.0106774	0.0952748	-2.9336
ENSG00000196569.12	protein_coding	LAMA2	2	OTTHUMG00000015545.2	chr6	HAVANA	gene	128883141	129516569	+	0.409759	1.32846	5.71464	3.24246	0.00477269	0.0547629	-2.93725
ENSG00000132716.18	protein_coding	DCAF8	2	OTTHUMG00000031604.8	chr1	HAVANA	gene	160215715	160262531	-	0.424525	1.34213	5.08407	3.20521	0.00517182	0.0580904	-2.93766
ENSG00000114251.14	protein_coding	WNT5A	2	OTTHUMG00000158361.6	chr3	HAVANA	gene	55465715	55490539	-	-1.49764	0.354133	1.34173	-2.80602	0.0121224	0.103492	-2.93888
ENSG00000134287.9	protein_coding	ARF3	1	OTTHUMG00000168080.2	chr12	HAVANA	gene	48935723	48957551	-	0.445386	1.36168	6.89762	3.29178	0.00429053	0.0510378	-2.94027
ENSG00000164342.12	protein_coding	TLR3	1	OTTHUMG00000160345.6	chr4	HAVANA	gene	186069152	186088069	+	0.996672	1.99539	1.96482	2.90007	0.00993595	0.0914734	-2.94322
ENSG00000125871.13	protein_coding	MGME1	2	OTTHUMG00000031955.2	chr20	HAVANA	gene	17968913	17991122	+	-0.426892	0.743863	5.41735	-3.23097	0.00489246	0.0559219	-2.94351
ENSG00000172336.4	protein_coding	POP7	2	OTTHUMG00000044311.3	chr7	HAVANA	gene	100706053	100707495	+	-0.380678	0.768077	7.18572	-3.30029	0.00421235	0.050511	-2.94493
ENSG00000162377.5	protein_coding	COA7	2	OTTHUMG00000008505.3	chr1	HAVANA	gene	52684451	52698366	-	-0.52102	0.696879	5.11967	-3.20641	0.00515853	0.0580286	-2.95001
ENSG00000186867.10	protein_coding	QRFPR	1	OTTHUMG00000133036.3	chr4	HAVANA	gene	121329312	121381059	-	-0.853145	0.553576	2.9571	-3.03024	0.00752991	0.0758155	-2.95254
ENSG00000144057.15	protein_coding	ST6GAL2	2	OTTHUMG00000130923.5	chr2	HAVANA	gene	106801600	106887108	-	-1.56977	0.336861	-0.758032	-2.71831	0.0145747	0.116293	-2.95276
ENSG00000183049.12	protein_coding	CAMK1D	2	OTTHUMG00000017683.3	chr10	HAVANA	gene	12349482	12835545	+	0.501915	1.41609	5.85914	3.24563	0.00474017	0.0545156	-2.9557
ENSG00000132109.9	protein_coding	TRIM21	1	OTTHUMG00000165701.1	chr11	HAVANA	gene	4384897	4393696	-	0.920349	1.89257	2.27216	2.90133	0.00990943	0.0913976	-2.95846
ENSG00000157240.3	protein_coding	FZD1	2	OTTHUMG00000023046.3	chr7	HAVANA	gene	91264364	91271326	+	-0.720042	0.60708	2.34053	-2.96888	0.00858348	0.0830219	-2.95852
ENSG00000178105.9	protein_coding	DDX10	1	OTTHUMG00000166540.1	chr11	HAVANA	gene	108665025	108940930	+	-0.42452	0.745087	5.23264	-3.21089	0.00510896	0.0576014	-2.9625
ENSG00000129170.8	protein_coding	CSRP3	2	OTTHUMG00000166100.2	chr11	HAVANA	gene	19182030	19210573	-	1.56235	2.95334	-0.772411	2.69809	0.0152041	0.11965	-2.96418
ENSG00000186814.13	protein_coding	ZSCAN30	1	OTTHUMG00000178569.5	chr18	HAVANA	gene	35251058	35290245	-	0.672377	1.5937	3.34897	3.03003	0.00753323	0.0758155	-2.96618
ENSG00000167528.12	protein_coding	ZNF641	2	OTTHUMG00000169906.4	chr12	HAVANA	gene	48337180	48351414	-	1.69232	3.23176	-0.121863	2.65765	0.0165418	0.125986	-2.96753
ENSG00000197217.12	protein_coding	ENTPD4	1	OTTHUMG00000097852.4	chr8	HAVANA	gene	23385783	23457695	-	-0.479238	0.717356	4.73736	-3.17492	0.00552053	0.06104	-2.96801
ENSG00000137628.16	protein_coding	DDX60	2	OTTHUMG00000161350.2	chr4	HAVANA	gene	168216293	168318807	-	1.11627	2.16785	1.11755	2.80519	0.0121435	0.103605	-2.97085
ENSG00000149489.8	protein_coding	ROM1	1	OTTHUMG00000167528.4	chr11	HAVANA	gene	62611722	62615120	+	1.06765	2.09602	1.6785	2.84707	0.0111163	0.0978242	-2.97753
ENSG00000101198.14	protein_coding	NKAIN4	1	OTTHUMG00000032959.3	chr20	HAVANA	gene	63240784	63272694	-	2.39558	5.2619	-1.30181	2.65256	0.016718	0.126945	-2.97905
ENSG00000240370.6	transcribed_processed_pseudogene	U47924.6	1	OTTHUMG00000156667.2	chr12	HAVANA	gene	6873389	6884741	+	0.582341	1.49728	3.31486	3.03523	0.00744995	0.0752824	-2.98236
ENSG00000103145.10	protein_coding	HCFC1R1	1	OTTHUMG00000177450.1	chr16	HAVANA	gene	3022620	3024286	-	0.629619	1.54716	6.28038	3.24848	0.00471114	0.0543324	-2.98442
ENSG00000164199.17	protein_coding	ADGRV1	1	OTTHUMG00000162668.11	chr5	HAVANA	gene	90529344	91164437	+	1.74199	3.34495	0.346131	2.71855	0.0145674	0.116293	-2.98479
ENSG00000064042.17	protein_coding	LIMCH1	1	OTTHUMG00000160575.7	chr4	HAVANA	gene	41359607	41700044	+	0.789291	1.72822	4.44899	3.05695	0.00711156	0.0728507	-2.98665
ENSG00000120669.15	protein_coding	SOHLH2	1	OTTHUMG00000016728.3	chr13	HAVANA	gene	36168208	36214615	-	-1.59995	0.329889	0.208702	-2.69218	0.0153928	0.120689	-2.98748
ENSG00000171241.8	protein_coding	SHCBP1	1	OTTHUMG00000132540.4	chr16	HAVANA	gene	46580554	46621626	-	-0.498397	0.707893	5.65225	-3.2355	0.0048449	0.0555059	-2.98871
ENSG00000104415.14	protein_coding	WISP1	1	OTTHUMG00000164440.3	chr8	HAVANA	gene	133191039	133231690	+	-1.82349	0.282536	-1.03741	-2.7036	0.0150299	0.11862	-2.9888
ENSG00000121297.6	protein_coding	TSHZ3	2	OTTHUMG00000150184.3	chr19	HAVANA	gene	31274945	31349547	-	-1.83175	0.280924	-1.23883	-2.66291	0.0163619	0.125128	-2.98987
ENSG00000164484.11	protein_coding	TMEM200A	2	OTTHUMG00000015557.1	chr6	HAVANA	gene	130365734	130443063	+	-1.16692	0.445371	-0.151927	-2.73652	0.0140292	0.113644	-2.99039
ENSG00000116096.5	protein_coding	SPR	1	OTTHUMG00000129777.2	chr2	HAVANA	gene	72887360	72892158	+	0.531296	1.44523	6.44664	3.24932	0.00470256	0.0543324	-2.99452
ENSG00000217716.3	processed_pseudogene	RPS10P3	1	OTTHUMG00000020159.2	chr9	HAVANA	gene	88016300	88016793	+	2.16848	4.49551	-0.254822	2.64716	0.0169071	0.127959	-2.99459
ENSG00000263155.5	protein_coding	MYZAP	2	OTTHUMG00000132453.7	chr15	HAVANA	gene	57591941	57685364	+	-0.778835	0.582837	2.40842	-2.97014	0.00856051	0.0829074	-2.99574
ENSG00000088826.17	protein_coding	SMOX	2	OTTHUMG00000031777.4	chr20	HAVANA	gene	4120980	4187747	+	-0.836067	0.560169	3.15142	-3.00826	0.00789194	0.078211	-2.99908
ENSG00000089356.18	protein_coding	FXYD3	2	OTTHUMG00000184625.2	chr19	HAVANA	gene	35115879	35124324	+	2.49806	5.64926	-1.63204	2.63425	0.0173669	0.12971	-2.99966
ENSG00000104951.15	protein_coding	IL4I1	2	OTTHUMG00000183377.2	chr19	HAVANA	gene	49889654	49929539	-	-1.59266	0.331559	-1.24821	-2.65911	0.0164917	0.125689	-3.00379
ENSG00000225770.1	processed_pseudogene	AC092933.3	1	OTTHUMG00000155584.1	chr3	HAVANA	gene	196536532	196536702	+	1.72282	3.30082	-0.573269	2.64686	0.0169177	0.127959	-3.0043
ENSG00000118640.10	protein_coding	VAMP8	1	OTTHUMG00000130180.4	chr2	HAVANA	gene	85561562	85582031	+	0.446599	1.36282	4.61761	3.13819	0.00597426	0.0645732	-3.00615
ENSG00000257704.3	protein_coding	INAFM1	2	OTTHUMG00000170128.2	chr19	HAVANA	gene	47274453	47275707	+	0.667927	1.58879	4.00463	3.07484	0.00684432	0.0706962	-3.00625
ENSG00000144579.7	protein_coding	CTDSP1	1	OTTHUMG00000133109.3	chr2	HAVANA	gene	218398256	218405941	+	-0.743386	0.597336	5.01007	-3.15966	0.0057048	0.0623228	-3.00715
ENSG00000125844.15	protein_coding	RRBP1	2	OTTHUMG00000031945.11	chr20	HAVANA	gene	17613678	17682295	-	-0.433545	0.74044	5.17336	-3.18757	0.00537217	0.0597934	-3.0087
ENSG00000105993.14	protein_coding	DNAJB6	2	OTTHUMG00000157242.6	chr7	HAVANA	gene	157335381	157417439	+	-0.415676	0.749668	7.00909	-3.26163	0.00457921	0.0532395	-3.00902
ENSG00000187650.3	protein_coding	VMAC	2	OTTHUMG00000180618.2	chr19	HAVANA	gene	5904858	5910853	+	2.43953	5.42464	-0.00674471	2.62858	0.0175724	0.130778	-3.01067
ENSG00000141699.10	protein_coding	FAM134C	1	OTTHUMG00000180275.2	chr17	HAVANA	gene	42579513	42610623	-	0.693293	1.61697	2.97195	2.96983	0.0085661	0.0829076	-3.0112
ENSG00000099377.13	protein_coding	HSD3B7	2	OTTHUMG00000132417.5	chr16	HAVANA	gene	30985207	30989152	+	0.909543	1.87845	2.50266	2.87902	0.0103893	0.0935771	-3.02058
ENSG00000224578.5	protein_coding	CTD-2119F7.2	2	OTTHUMG00000173250.2	chr16	HAVANA	gene	51553436	51647132	+	0.516543	1.43052	4.12308	3.10302	0.00644291	0.0679149	-3.02069
ENSG00000112304.10	protein_coding	ACOT13	2	OTTHUMG00000014359.2	chr6	HAVANA	gene	24667035	24705065	+	0.645167	1.56392	4.26213	3.10123	0.00646768	0.068056	-3.02166
ENSG00000182253.14	protein_coding	SYNM	1	OTTHUMG00000171887.5	chr15	HAVANA	gene	99098217	99135593	+	0.452783	1.36868	4.40536	3.12338	0.00616738	0.0660334	-3.02674
ENSG00000166888.11	protein_coding	STAT6	1	OTTHUMG00000171194.6	chr12	HAVANA	gene	57095408	57132139	-	0.572721	1.48733	5.50446	3.17812	0.00548257	0.0606664	-3.02749
ENSG00000160957.12	protein_coding	RECQL4	2	OTTHUMG00000165178.6	chr8	HAVANA	gene	144511288	144517845	-	-0.488136	0.712946	5.02091	-3.16037	0.005696	0.0623228	-3.0298
ENSG00000103034.14	protein_coding	NDRG4	1	OTTHUMG00000133485.18	chr16	HAVANA	gene	58462846	58513628	+	0.629581	1.54712	2.92094	2.96715	0.00861521	0.0832208	-3.03111
ENSG00000104331.8	protein_coding	IMPAD1	2	OTTHUMG00000164415.1	chr8	HAVANA	gene	56957933	56993844	-	-0.388561	0.763891	6.19131	-3.23014	0.00490121	0.055979	-3.03335
ENSG00000110318.13	protein_coding	CEP126	2	OTTHUMG00000167319.2	chr11	HAVANA	gene	101915015	102001058	+	0.562705	1.47704	3.8453	3.02712	0.00758026	0.0761859	-3.03691
ENSG00000213073.4	transcribed_processed_pseudogene	RP11-288H12.3	1	OTTHUMG00000015946.2	chr6	HAVANA	gene	160093082	160096212	+	2.17045	4.50162	-1.24408	2.61049	0.0182445	0.134355	-3.03885
ENSG00000169330.8	protein_coding	KIAA1024	2	OTTHUMG00000172073.1	chr15	HAVANA	gene	79432516	79472290	+	-1.48405	0.357485	-0.946409	-2.66042	0.0164468	0.125561	-3.03933
ENSG00000124749.16	protein_coding	COL21A1	2	OTTHUMG00000014907.5	chr6	HAVANA	gene	56056590	56394094	-	2.18891	4.55962	-2.16427	2.6137	0.0181234	0.133793	-3.03996
ENSG00000160094.14	protein_coding	ZNF362	2	OTTHUMG00000004124.5	chr1	HAVANA	gene	33256545	33300719	+	0.635415	1.55338	4.43265	3.09326	0.00657924	0.0689617	-3.04171
ENSG00000187134.13	protein_coding	AKR1C1	2	OTTHUMG00000017580.3	chr10	HAVANA	gene	4963253	4983283	+	0.522773	1.43671	8.25449	3.27683	0.00443136	0.0520538	-3.04299
ENSG00000276390.1	sense_intronic	RP1-197B17.5	2	OTTHUMG00000187397.1	chr12	HAVANA	gene	47699401	47699917	-	-0.832738	0.561463	2.26481	-2.89157	0.0101167	0.0923051	-3.04366
ENSG00000186481.16	transcribed_unprocessed_pseudogene	ANKRD20A5P	1	OTTHUMG00000191817.1	chr18	HAVANA	gene	14179097	14252140	+	-1.58288	0.333815	0.461357	-2.70204	0.0150789	0.118853	-3.04633
ENSG00000143322.19	protein_coding	ABL2	2	OTTHUMG00000035199.6	chr1	HAVANA	gene	179099327	179229684	-	-0.517366	0.698646	5.22003	-3.15949	0.00570679	0.0623228	-3.0472
ENSG00000143341.11	protein_coding	HMCN1	2	OTTHUMG00000059337.3	chr1	HAVANA	gene	185734551	186190949	+	0.913024	1.88299	3.56589	3.02098	0.0076803	0.076932	-3.04753
ENSG00000251169.2	lincRNA	AC005355.2	1	OTTHUMG00000163059.2	chr5	HAVANA	gene	134506552	134509229	+	1.66166	3.16381	-0.0419765	2.66078	0.0164345	0.125554	-3.05069
ENSG00000138061.11	protein_coding	CYP1B1	1	OTTHUMG00000100970.8	chr2	HAVANA	gene	38066973	38109902	-	1.03096	2.04339	4.8839	3.08664	0.00667338	0.0695955	-3.05766
ENSG00000164855.15	protein_coding	TMEM184A	2	OTTHUMG00000119025.12	chr7	HAVANA	gene	1542235	1560821	-	0.889468	1.85249	1.9531	2.82027	0.0117636	0.101539	-3.05864
ENSG00000188313.12	protein_coding	PLSCR1	2	OTTHUMG00000159427.4	chr3	HAVANA	gene	146515180	146544864	-	-0.495646	0.709244	5.20726	-3.17048	0.00557354	0.0613888	-3.06133
ENSG00000136897.7	protein_coding	MRPL50	2	OTTHUMG00000020384.1	chr9	HAVANA	gene	101387633	101398614	-	-0.698631	0.616157	2.64617	-2.93829	0.00916115	0.0866162	-3.06186
ENSG00000150630.3	protein_coding	VEGFC	2	OTTHUMG00000160734.3	chr4	HAVANA	gene	176683538	176792727	-	-0.431969	0.74125	5.12699	-3.17423	0.00552871	0.0610411	-3.0628
ENSG00000256955.2	lincRNA	RP11-417L19.2	2	OTTHUMG00000168051.2	chr12	HAVANA	gene	131857420	131864538	+	2.71977	6.58767	-1.29838	2.59575	0.0188097	0.136981	-3.06292
ENSG00000155465.18	protein_coding	SLC7A7	1	OTTHUMG00000028692.13	chr14	HAVANA	gene	22773222	22829820	-	0.944284	1.92423	1.699	2.79995	0.0122785	0.104279	-3.06319
ENSG00000141994.15	protein_coding	DUS3L	2	OTTHUMG00000162311.4	chr19	HAVANA	gene	5784832	5791238	-	-0.662963	0.63158	4.12858	-3.07795	0.00679884	0.0704536	-3.06499
ENSG00000245904.3	antisense	RP11-796E2.4	2	OTTHUMG00000170094.2	chr12	HAVANA	gene	92145573	92189660	+	1.28521	2.43718	-0.171825	2.63654	0.0172845	0.129629	-3.06508
ENSG00000161791.13	protein_coding	FMNL3	2	OTTHUMG00000169651.5	chr12	HAVANA	gene	49636499	49708165	-	-0.779748	0.582469	2.32882	-2.91004	0.00972785	0.0902825	-3.0652
ENSG00000163864.16	protein_coding	NMNAT3	1	OTTHUMG00000159951.4	chr3	HAVANA	gene	139560180	139678017	-	0.871183	1.82916	2.44648	2.8651	0.0107002	0.0953293	-3.07154
ENSG00000159915.12	protein_coding	ZNF233	1	OTTHUMG00000182354.2	chr19	HAVANA	gene	44259880	44275317	+	1.46278	2.75638	0.53066	2.64383	0.0170246	0.128547	-3.0731
ENSG00000104936.17	protein_coding	DMPK	1	OTTHUMG00000182334.3	chr19	HAVANA	gene	45769717	45782552	-	0.940407	1.91907	2.26524	2.84729	0.011111	0.0978242	-3.0744
ENSG00000238045.9	antisense	AC009133.12	2	OTTHUMG00000132117.4	chr16	HAVANA	gene	29808636	29821252	-	2.24572	4.74274	-0.887413	2.58496	0.0192343	0.13843	-3.07479
ENSG00000122545.19	protein_coding	2018-09-07	2	OTTHUMG00000155063.5	chr7	HAVANA	gene	35800932	35907105	+	-0.85861	0.551484	3.92394	-3.10571	0.00640592	0.0675727	-3.07511
ENSG00000164850.14	protein_coding	GPER1	2	OTTHUMG00000023680.4	chr7	HAVANA	gene	1082208	1093815	+	2.05341	4.15087	0.623652	2.611	0.018225	0.134344	-3.07543
ENSG00000279369.1	TEC	RP11-51F16.1	2	OTTHUMG00000176077.1	chr17	HAVANA	gene	63700847	63702670	+	-1.06744	0.477167	0.919581	-2.76392	0.0132452	0.109496	-3.0792
ENSG00000197261.11	protein_coding	C6orf141	1	OTTHUMG00000014820.6	chr6	HAVANA	gene	49550646	49561907	+	-0.606738	0.65668	3.48219	-3.03679	0.00742509	0.0750821	-3.08089
ENSG00000163235.15	protein_coding	TGFA	2	OTTHUMG00000129669.39	chr2	HAVANA	gene	70447280	70554193	-	-0.584551	0.666857	3.52339	-3.038	0.00740596	0.0749903	-3.0809
ENSG00000137868.18	protein_coding	STRA6	2	OTTHUMG00000138998.4	chr15	HAVANA	gene	74179466	74212267	-	-0.518962	0.697874	6.06314	-3.20573	0.00516611	0.0580701	-3.08124
ENSG00000132535.18	protein_coding	DLG4	1	OTTHUMG00000134327.5	chr17	HAVANA	gene	7189890	7219702	-	-1.09889	0.466876	0.881911	-2.75088	0.013613	0.111915	-3.08175
ENSG00000253485.2	protein_coding	PCDHGA5	2	OTTHUMG00000163683.2	chr5	HAVANA	gene	141364232	141512979	+	2.39012	5.24201	-0.394272	2.58758	0.0191305	0.138083	-3.08279
ENSG00000114923.16	protein_coding	SLC4A3	1	OTTHUMG00000059238.20	chr2	HAVANA	gene	219627327	219641980	+	3.03219	8.18052	-1.18073	2.58139	0.0193767	0.139185	-3.08288
ENSG00000163328.13	protein_coding	GPR155	2	OTTHUMG00000132336.2	chr2	HAVANA	gene	174431571	174487094	-	0.745834	1.67694	2.86637	2.90075	0.0099216	0.0913976	-3.08386
ENSG00000277423.1	lincRNA	RP11-173P15.9	2	OTTHUMG00000187244.1	chr12	HAVANA	gene	120703867	120704282	+	-1.362	0.389043	0.326483	-2.67554	0.0159368	0.123205	-3.08461
ENSG00000173083.14	protein_coding	HPSE	1	OTTHUMG00000130425.5	chr4	HAVANA	gene	83292461	83335153	-	1.09465	2.13562	2.07194	2.78162	0.0127616	0.106939	-3.09197
ENSG00000164692.17	protein_coding	COL1A2	2	OTTHUMG00000148675.2	chr7	HAVANA	gene	94394561	94431232	+	0.309402	1.23919	8.99591	3.2574	0.00462124	0.0535612	-3.09303
ENSG00000187741.14	protein_coding	FANCA	2	OTTHUMG00000173049.6	chr16	HAVANA	gene	89737549	89816657	-	-0.495003	0.70956	4.50886	-3.11495	0.00628	0.0666714	-3.09314
ENSG00000260088.1	lincRNA	RP11-92G12.3	2	OTTHUMG00000035741.1	chr1	HAVANA	gene	200669507	200694250	+	1.74655	3.35555	-0.488846	2.59	0.0190349	0.137806	-3.09418
ENSG00000125726.10	protein_coding	CD70	1	OTTHUMG00000181834.3	chr19	HAVANA	gene	6583183	6604103	-	-0.40739	0.753986	4.82507	-3.13372	0.00603187	0.0650072	-3.09667
ENSG00000135249.7	protein_coding	RINT1	1	OTTHUMG00000157400.2	chr7	HAVANA	gene	105532085	105567677	+	-1.43736	0.369242	0.452674	-2.69506	0.0153006	0.120156	-3.09731
ENSG00000106049.8	protein_coding	HIBADH	1	OTTHUMG00000097035.4	chr7	HAVANA	gene	27525442	27662995	-	0.399129	1.31871	5.23958	3.14618	0.00587255	0.0636121	-3.09996
ENSG00000163050.16	protein_coding	ADCK3	2	OTTHUMG00000037621.5	chr1	HAVANA	gene	226897536	226987545	+	0.477293	1.39213	5.015	3.10107	0.00647	0.068056	-3.10043
ENSG00000270332.1	lincRNA	RP11-82L2.1	2	OTTHUMG00000185235.1	chr9	HAVANA	gene	104080024	104093073	-	1.57747	2.98445	-0.784552	2.57468	0.0196473	0.140251	-3.10452
ENSG00000088756.12	protein_coding	ARHGAP28	1	OTTHUMG00000167698.10	chr18	HAVANA	gene	6729718	6915716	+	1.66843	3.17868	0.684205	2.65904	0.0164942	0.125689	-3.10523
ENSG00000142583.17	protein_coding	SLC2A5	2	OTTHUMG00000001771.3	chr1	HAVANA	gene	9035107	9088478	-	-1.6712	0.313991	-0.326515	-2.63616	0.0172979	0.129629	-3.11206
ENSG00000070423.17	protein_coding	RNF126	2	OTTHUMG00000180592.9	chr19	HAVANA	gene	647526	663277	-	-0.431999	0.741234	6.94523	-3.21212	0.00509544	0.0574924	-3.11348
ENSG00000173638.18	protein_coding	SLC19A1	1	OTTHUMG00000090397.7	chr21	HAVANA	gene	45493572	45544411	-	-0.571814	0.67277	4.36824	-3.07854	0.00679018	0.0704298	-3.11547
ENSG00000269974.1	lincRNA	RP11-932O9.10	2	OTTHUMG00000183913.1	chr15	HAVANA	gene	30648797	30649529	+	-2.02968	0.244909	-0.886546	-2.5798	0.0194406	0.139401	-3.11566
ENSG00000137710.15	protein_coding	RDX	1	OTTHUMG00000166574.8	chr11	HAVANA	gene	109864295	110296722	-	0.666239	1.58693	5.80367	3.15263	0.0057916	0.062781	-3.12138
ENSG00000224032.6	lincRNA	EPB41L4A-AS1	2	OTTHUMG00000128803.3	chr5	HAVANA	gene	112160526	112164276	+	0.405241	1.32431	6.91705	3.20007	0.00522951	0.0585619	-3.12149
ENSG00000178665.14	protein_coding	ZNF713	2	OTTHUMG00000156175.2	chr7	HAVANA	gene	55887475	55942225	+	1.11053	2.15924	1.06197	2.68958	0.0154767	0.120939	-3.12259
ENSG00000259209.3	antisense	RP5-991G20.2	2	OTTHUMG00000172560.4	chr16	HAVANA	gene	72805998	72809872	+	1.52962	2.88709	-0.758053	2.57518	0.0196268	0.140238	-3.12266
ENSG00000150967.17	protein_coding	ABCB9	1	OTTHUMG00000168769.6	chr12	HAVANA	gene	122920951	122981649	-	0.819646	1.76497	2.24819	2.84189	0.0112386	0.0984205	-3.12548
ENSG00000221890.3	protein_coding	NPTXR	2	OTTHUMG00000150458.2	chr22	HAVANA	gene	38818452	38843982	-	0.72245	1.64998	2.05498	2.81689	0.0118477	0.10197	-3.12907
ENSG00000158623.14	protein_coding	COPG2	2	OTTHUMG00000155364.4	chr7	HAVANA	gene	130506238	130668748	-	-1.17069	0.444209	0.803651	-2.6982	0.0152004	0.11965	-3.13042
ENSG00000277342.1	sense_intronic	RP11-843B15.4	2	OTTHUMG00000187209.1	chr12	HAVANA	gene	32109076	32109602	+	-1.33231	0.397131	-0.264993	-2.62734	0.0176179	0.130962	-3.13156
ENSG00000126432.13	protein_coding	PRDX5	2	OTTHUMG00000168805.1	chr11	HAVANA	gene	64318088	64321811	+	0.3874	1.30803	7.98224	3.22416	0.00496485	0.0565758	-3.13401
ENSG00000254615.2	lincRNA	RP11-395G23.3	2	OTTHUMG00000156320.6	chr8	HAVANA	gene	106270144	106272899	+	-0.542741	0.686465	3.96543	-3.02971	0.00753844	0.0758168	-3.13411
ENSG00000119711.12	protein_coding	ALDH6A1	2	OTTHUMG00000171203.1	chr14	HAVANA	gene	74056850	74084493	-	0.720778	1.64807	3.30875	2.93911	0.00914507	0.0865709	-3.13813
ENSG00000197948.10	protein_coding	FCHSD1	1	OTTHUMG00000163762.4	chr5	HAVANA	gene	141639302	141651419	-	0.806848	1.74938	2.21475	2.81261	0.0119552	0.102475	-3.14147
ENSG00000174132.8	protein_coding	FAM174A	1	OTTHUMG00000128726.2	chr5	HAVANA	gene	100535305	100586741	+	-0.383047	0.766816	5.63638	-3.15574	0.00575311	0.0625457	-3.14168
ENSG00000173227.13	protein_coding	SYT12	2	OTTHUMG00000167101.2	chr11	HAVANA	gene	67006778	67050863	+	-0.462769	0.725592	4.32974	-3.07858	0.00678966	0.0704298	-3.14173
ENSG00000275183.1	protein_coding	LENG9	2	OTTHUMG00000188273.2	chr19	HAVANA	gene	54461796	54463711	-	-1.86604	0.274326	-0.902638	-2.55224	0.0205778	0.143928	-3.14491
ENSG00000272202.1	antisense	RP11-157F20.3	2	OTTHUMG00000185634.1	chr3	HAVANA	gene	57078943	57080101	+	1.93979	3.83651	-0.957239	2.56106	0.0202072	0.142338	-3.14604
ENSG00000116701.14	protein_coding	NCF2	2	OTTHUMG00000035329.4	chr1	HAVANA	gene	183555563	183590876	-	2.21855	4.65426	0.273959	2.5392	0.0211379	0.145996	-3.15076
ENSG00000116857.16	protein_coding	TMEM9	2	OTTHUMG00000035831.7	chr1	HAVANA	gene	201134772	201171574	-	0.493216	1.40758	7.70872	3.21291	0.00508673	0.0574426	-3.15191
ENSG00000204248.10	protein_coding	COL11A2	2	OTTHUMG00000031036.10	chr6	HAVANA	gene	33162681	33192499	-	1.74922	3.36178	-0.64281	2.5462	0.0208355	0.144965	-3.15383
ENSG00000233203.6	antisense	RP11-67L3.4	2	OTTHUMG00000009988.1	chr1	HAVANA	gene	54887563	54888850	+	1.47323	2.77642	0.176729	2.59092	0.0189986	0.137806	-3.15512
ENSG00000244219.6	protein_coding	TMEM225B	2	OTTHUMG00000156636.2	chr7	HAVANA	gene	99598066	99610813	+	-2.02878	0.245062	-0.924948	-2.54005	0.0211011	0.145996	-3.15785
ENSG00000142409.5	protein_coding	ZNF787	2	OTTHUMG00000181760.5	chr19	HAVANA	gene	56087366	56121280	-	-0.443242	0.73548	5.30305	-3.11937	0.00622071	0.0663706	-3.15827
ENSG00000197747.8	protein_coding	S100A10	2	OTTHUMG00000013068.2	chr1	HAVANA	gene	151982915	151994390	-	0.422534	1.34028	10.1658	3.24472	0.00474946	0.0545803	-3.16308
ENSG00000089127.12	protein_coding	OAS1	1	OTTHUMG00000169792.6	chr12	HAVANA	gene	112906777	112933222	+	0.721447	1.64883	3.08683	2.8996	0.00994575	0.0915063	-3.16326
ENSG00000164076.16	protein_coding	CAMKV	1	OTTHUMG00000158288.7	chr3	HAVANA	gene	49857988	49870222	-	-1.71033	0.30559	-0.487411	-2.57475	0.0196442	0.140251	-3.16472
ENSG00000231871.5	antisense	RP11-90L20.3	1	OTTHUMG00000035809.1	chr1	HAVANA	gene	201688259	201829559	-	2.14591	4.42572	-1.04565	2.54331	0.02096	0.14546	-3.16482
ENSG00000269176.2	antisense	RP11-727F15.12	2	OTTHUMG00000183002.2	chr11	HAVANA	gene	62786023	62786785	-	1.5213	2.87049	-0.131622	2.573	0.0197153	0.1404	-3.16552
ENSG00000106261.16	protein_coding	ZKSCAN1	2	OTTHUMG00000156534.3	chr7	HAVANA	gene	100015572	100041689	+	0.386435	1.30716	5.87335	3.13205	0.00605358	0.0651555	-3.16643
ENSG00000104883.7	protein_coding	PEX11G	2	OTTHUMG00000182044.1	chr19	HAVANA	gene	7476875	7497449	-	1.88675	3.69802	0.142188	2.55057	0.0206487	0.144222	-3.17116
ENSG00000068024.16	protein_coding	HDAC4	2	OTTHUMG00000133344.7	chr2	HAVANA	gene	239048168	239401654	-	-0.617582	0.651762	3.38571	-2.96495	0.00865574	0.08345	-3.17552
ENSG00000198691.11	protein_coding	ABCA4	2	OTTHUMG00000010622.3	chr1	HAVANA	gene	93992835	94121132	-	1.48654	2.80217	0.761075	2.56602	0.0200014	0.141525	-3.17642
ENSG00000125845.6	protein_coding	BMP2	2	OTTHUMG00000031833.3	chr20	HAVANA	gene	6767664	6780280	+	-1.55692	0.339875	-0.154447	-2.60734	0.0183637	0.13471	-3.17703
ENSG00000226137.5	lincRNA	BAIAP2-AS1	2	OTTHUMG00000177697.3	chr17	HAVANA	gene	81029130	81034881	-	0.832825	1.78117	2.66253	2.86134	0.0107857	0.0959606	-3.17788
ENSG00000105996.6	protein_coding	HOXA2	2	OTTHUMG00000023208.6	chr7	HAVANA	gene	27100354	27102811	-	-1.21164	0.431777	0.0303027	-2.64143	0.0171094	0.128882	-3.1779
ENSG00000160233.7	protein_coding	LRRC3	2	OTTHUMG00000040847.4	chr21	HAVANA	gene	44455486	44462196	+	-1.66663	0.314989	0.173514	-2.59595	0.0188022	0.136981	-3.17838
ENSG00000112561.17	protein_coding	TFEB	2	OTTHUMG00000014684.13	chr6	HAVANA	gene	41683978	41736259	-	0.984884	1.97915	1.4728	2.78667	0.0126265	0.106232	-3.17885
ENSG00000243244.5	protein_coding	STON1	2	OTTHUMG00000129169.5	chr2	HAVANA	gene	48529383	48598513	+	1.74831	3.35964	0.461765	2.57385	0.0196811	0.140346	-3.18113
ENSG00000149809.14	protein_coding	TM7SF2	2	OTTHUMG00000165603.2	chr11	HAVANA	gene	65111845	65116384	+	1.25925	2.39372	1.02425	2.66966	0.0161331	0.123951	-3.18142
ENSG00000183833.16	protein_coding	MAATS1	2	OTTHUMG00000159422.1	chr3	HAVANA	gene	119703022	119767102	+	0.585481	1.50054	3.59561	2.97333	0.00850255	0.0825605	-3.18472
ENSG00000035862.12	protein_coding	TIMP2	2	OTTHUMG00000154517.4	chr17	HAVANA	gene	78852977	78925387	-	-0.370556	0.773484	6.87408	-3.18481	0.00540417	0.0600217	-3.18474
ENSG00000239523.5	antisense	RP11-202D20.1	2	OTTHUMG00000159536.2	chr3	HAVANA	gene	123585542	123644568	+	1.01562	2.02176	1.5134	2.71525	0.0146682	0.116727	-3.18626
ENSG00000273008.1	lincRNA	RP11-351D16.3	2	OTTHUMG00000186248.1	chr10	HAVANA	gene	43136824	43138334	-	1.83205	3.56042	-0.214984	2.53573	0.0212895	0.146703	-3.18637
ENSG00000205334.2	lincRNA	AC074091.13	1	OTTHUMG00000151945.1	chr2	HAVANA	gene	27705786	27715732	-	2.10593	4.30477	-0.905676	2.52958	0.0215604	0.14809	-3.18652
ENSG00000114993.16	protein_coding	RTKN	1	OTTHUMG00000129955.6	chr2	HAVANA	gene	74425836	74442422	-	0.478544	1.39334	4.29306	3.01699	0.00774607	0.077331	-3.1873
ENSG00000225077.2	lincRNA	LINC00337	2	OTTHUMG00000001255.4	chr1	HAVANA	gene	6236240	6239444	+	-2.09724	0.233705	-0.721446	-2.53798	0.0211908	0.146159	-3.19001
ENSG00000149929.15	protein_coding	HIRIP3	1	OTTHUMG00000132118.4	chr16	HAVANA	gene	29992321	29996436	-	-0.487297	0.713361	4.56743	-3.06019	0.0070624	0.0724467	-3.19624
ENSG00000143319.16	protein_coding	ISG20L2	2	OTTHUMG00000041301.3	chr1	HAVANA	gene	156721891	156728799	-	-0.377045	0.770013	6.61752	-3.16396	0.00565229	0.0619921	-3.19764
ENSG00000241520.1	antisense	AC098820.4	1	OTTHUMG00000154849.1	chr2	HAVANA	gene	216483032	216487196	-	2.36812	5.16268	-0.924657	2.50672	0.0225959	0.152948	-3.19841
ENSG00000136603.13	protein_coding	SKIL	1	OTTHUMG00000158831.6	chr3	HAVANA	gene	170357678	170396835	+	-0.738679	0.599288	3.02982	-2.89737	0.00999294	0.0916775	-3.19944
ENSG00000175564.12	protein_coding	UCP3	2	OTTHUMG00000168109.2	chr11	HAVANA	gene	74000281	74009435	-	2.12436	4.3601	-0.817135	2.50498	0.0226765	0.153215	-3.20015
ENSG00000174013.7	protein_coding	FBXO45	2	OTTHUMG00000155571.2	chr3	HAVANA	gene	196568611	196589059	+	-0.487602	0.713209	4.10966	-3.0177	0.00773435	0.0772657	-3.20048
ENSG00000164970.14	protein_coding	FAM219A	2	OTTHUMG00000019822.3	chr9	HAVANA	gene	34398184	34458570	-	-0.459021	0.72748	4.91161	-3.07774	0.00680193	0.0704536	-3.20474
ENSG00000172771.11	protein_coding	EFCAB12	2	OTTHUMG00000159464.2	chr3	HAVANA	gene	129401321	129428651	-	1.48169	2.79275	-0.73705	2.57034	0.019824	0.140838	-3.20519
ENSG00000123685.8	protein_coding	BATF3	2	OTTHUMG00000036807.2	chr1	HAVANA	gene	212686418	212699985	-	-1.15005	0.450609	1.10325	-2.63497	0.0173406	0.12971	-3.20667
ENSG00000186665.9	protein_coding	C17orf58	2	OTTHUMG00000179782.2	chr17	HAVANA	gene	67991101	67996431	-	-0.419799	0.747529	5.17467	-3.08459	0.00670266	0.0697648	-3.20965
ENSG00000113916.17	protein_coding	BCL6	1	OTTHUMG00000156441.3	chr3	HAVANA	gene	187721377	187745727	-	-0.655965	0.634651	2.82816	-2.9134	0.00965866	0.0896962	-3.21383
ENSG00000160050.14	protein_coding	CCDC28B	2	OTTHUMG00000005738.7	chr1	HAVANA	gene	32200386	32205387	+	0.610063	1.52633	4.43387	3.01956	0.00770379	0.0771005	-3.21687
ENSG00000150281.6	protein_coding	CTF1	2	OTTHUMG00000132413.2	chr16	HAVANA	gene	30896607	30903560	+	1.63918	3.11488	0.0883637	2.50706	0.0225804	0.152948	-3.21717
ENSG00000204264.8	protein_coding	PSMB8	2	OTTHUMG00000031285.3	chr6	HAVANA	gene	32840717	32844703	-	0.46442	1.37976	7.05233	3.15916	0.00571088	0.0623228	-3.22383
ENSG00000143933.16	protein_coding	CALM2	2	OTTHUMG00000128850.8	chr2	HAVANA	gene	47160082	47176601	-	-0.373117	0.772113	8.33613	-3.19497	0.00528726	0.0590754	-3.22662
ENSG00000149428.18	protein_coding	HYOU1	1	OTTHUMG00000166354.9	chr11	HAVANA	gene	119044189	119057202	-	-0.982698	0.506033	0.82397	-2.68254	0.0157059	0.122044	-3.22662
ENSG00000163283.6	protein_coding	ALPP	2	OTTHUMG00000133255.4	chr2	HAVANA	gene	232378534	232382889	+	2.34322	5.07433	-1.15781	2.48813	0.0234729	0.15605	-3.2274
ENSG00000138080.13	protein_coding	EMILIN1	1	OTTHUMG00000097069.4	chr2	HAVANA	gene	27078567	27086408	+	-1.56523	0.337925	-0.187296	-2.58637	0.0191783	0.138294	-3.22913
ENSG00000163364.9	lincRNA	AC017048.3	1	OTTHUMG00000154156.3	chr2	HAVANA	gene	176629589	176637931	-	0.562699	1.47703	5.1347	3.04628	0.00727591	0.0740256	-3.23024
ENSG00000171843.15	protein_coding	MLLT3	2	OTTHUMG00000019650.3	chr9	HAVANA	gene	20341665	20622543	-	0.836556	1.78578	3.39338	2.9162	0.00960146	0.0893319	-3.23049
ENSG00000118276.11	protein_coding	B4GALT6	1	OTTHUMG00000131980.4	chr18	HAVANA	gene	31622247	31685836	-	-0.782541	0.581342	1.78392	-2.77509	0.012938	0.107612	-3.23531
ENSG00000239713.8	protein_coding	APOBEC3G	2	OTTHUMG00000151081.4	chr22	HAVANA	gene	39077005	39087743	+	2.45197	5.47161	-0.0752639	2.48221	0.0237588	0.157459	-3.23742
ENSG00000205930.8	antisense	C21orf62-AS1	1	OTTHUMG00000064992.5	chr21	HAVANA	gene	32772100	32893735	+	1.77929	3.43256	-0.72204	2.49441	0.0231731	0.154955	-3.24049
ENSG00000170873.18	protein_coding	MTSS1	1	OTTHUMG00000048189.5	chr8	HAVANA	gene	124550790	124728429	-	-0.573021	0.672208	3.89644	-2.99703	0.00808337	0.0796843	-3.24069
ENSG00000104324.15	protein_coding	CPQ	1	OTTHUMG00000164690.4	chr8	HAVANA	gene	96645227	97149654	+	1.52304	2.87396	0.427703	2.54857	0.0207343	0.144485	-3.24337
ENSG00000277157.1	protein_coding	HIST1H4D	2	OTTHUMG00000014423.2	chr6	HAVANA	gene	26188765	26189076	-	-1.68445	0.311121	-0.87355	-2.5225	0.0218762	0.149571	-3.24352
ENSG00000134186.11	protein_coding	PRPF38B	2	OTTHUMG00000010991.3	chr1	HAVANA	gene	108692323	108701803	+	-0.485827	0.714088	6.25076	-3.12241	0.00618025	0.0660334	-3.24476
ENSG00000249069.7	lincRNA	RP11-461C13.1	1	OTTHUMG00000162286.3	chr5	HAVANA	gene	54320944	54415125	+	2.21999	4.65889	-1.94906	2.47534	0.0240949	0.158909	-3.24726
ENSG00000261236.7	protein_coding	BOP1	2	OTTHUMG00000174603.3	chr8	HAVANA	gene	144262102	144291370	-	-0.393754	0.761147	6.39526	-3.13153	0.00606033	0.0651726	-3.24836
ENSG00000261884.2	protein_coding	CTC-479C5.12	2	OTTHUMG00000177516.4	chr16	HAVANA	gene	67929614	67936017	-	1.12321	2.17831	1.40955	2.67727	0.0158793	0.122951	-3.24943
ENSG00000182551.13	protein_coding	ADI1	2	OTTHUMG00000112441.6	chr2	HAVANA	gene	3497361	3519736	-	0.384073	1.30502	7.32348	3.15677	0.00574037	0.0624527	-3.25003
ENSG00000144026.11	protein_coding	ZNF514	2	OTTHUMG00000130391.4	chr2	HAVANA	gene	95147330	95165413	-	0.435545	1.35242	4.37782	3.00732	0.00790777	0.0783158	-3.25063
ENSG00000132603.13	protein_coding	NIP7	2	OTTHUMG00000137568.5	chr16	HAVANA	gene	69339430	69343111	+	-0.381642	0.767564	7.77808	-3.1695	0.0055852	0.0614372	-3.25123
ENSG00000247400.3	lincRNA	RP11-10E18.6	1	OTTHUMG00000166152.2	chr13	HAVANA	gene	95648733	95676925	-	1.01272	2.01771	1.2565	2.67727	0.0158792	0.122951	-3.25309
ENSG00000215271.7	protein_coding	HOMEZ	2	OTTHUMG00000172122.7	chr14	HAVANA	gene	23272422	23299447	-	0.571864	1.48644	3.86312	2.94023	0.00912344	0.0865044	-3.25334
ENSG00000119938.8	protein_coding	PPP1R3C	2	OTTHUMG00000018745.1	chr10	HAVANA	gene	91628442	91633054	-	0.825307	1.77191	2.77649	2.81258	0.0119559	0.102475	-3.25413
ENSG00000234678.1	antisense	RP11-465N4.4	2	OTTHUMG00000035865.1	chr1	HAVANA	gene	202000094	202010353	-	1.09777	2.14024	1.77525	2.73787	0.0139895	0.113508	-3.25436
ENSG00000168310.10	protein_coding	IRF2	1	OTTHUMG00000160606.8	chr4	HAVANA	gene	184387713	184474580	-	0.489831	1.40428	4.32897	2.9942	0.00813233	0.0800082	-3.25714
ENSG00000120262.9	protein_coding	CCDC170	2	OTTHUMG00000015839.2	chr6	HAVANA	gene	151494030	151621193	+	2.20705	4.61731	-1.27682	2.46513	0.0246022	0.161043	-3.26045
ENSG00000165689.16	protein_coding	SDCCAG3	2	OTTHUMG00000020928.13	chr9	HAVANA	gene	136401922	136410609	-	-0.526387	0.694291	6.33072	-3.12242	0.00618017	0.0660334	-3.26105
ENSG00000183145.8	protein_coding	RIPPLY3	2	OTTHUMG00000086639.1	chr21	HAVANA	gene	37006150	37019659	+	1.46536	2.76132	0.0232767	2.52798	0.0216311	0.148203	-3.26173
ENSG00000248489.1	lincRNA	CTD-2007H13.3	2	OTTHUMG00000162749.1	chr5	HAVANA	gene	98929171	98995013	+	1.11484	2.16571	0.503792	2.59034	0.0190214	0.137806	-3.26174
ENSG00000196154.11	protein_coding	S100A4	2	OTTHUMG00000013546.3	chr1	HAVANA	gene	153543613	153550136	-	0.35311	1.27731	9.08189	3.18453	0.00540745	0.0600217	-3.26316
ENSG00000037474.14	protein_coding	NSUN2	1	OTTHUMG00000090455.2	chr5	HAVANA	gene	6599239	6633291	-	-0.355731	0.781474	6.69895	-3.12989	0.00608172	0.0653555	-3.2693
ENSG00000132357.13	protein_coding	CARD6	1	OTTHUMG00000094775.8	chr5	HAVANA	gene	40841184	40860175	+	0.63283	1.5506	3.4781	2.91657	0.00959382	0.0893166	-3.26936
ENSG00000135736.5	protein_coding	CCDC102A	2	OTTHUMG00000133472.2	chr16	HAVANA	gene	57512178	57536599	-	0.642069	1.56057	3.38265	2.87662	0.0104424	0.0938748	-3.26949
ENSG00000106415.12	protein_coding	GLCCI1	2	OTTHUMG00000151984.4	chr7	HAVANA	gene	7968794	8094272	+	0.582905	1.49786	4.18535	2.96156	0.00871845	0.0837876	-3.26959
ENSG00000143067.4	protein_coding	ZNF697	2	OTTHUMG00000012962.3	chr1	HAVANA	gene	119619422	119647773	-	-0.898077	0.536601	2.13911	-2.78153	0.0127638	0.106939	-3.27091
ENSG00000137575.11	protein_coding	SDCBP	2	OTTHUMG00000164303.2	chr8	HAVANA	gene	58552924	58582860	+	-0.816414	0.567852	4.93818	-3.05347	0.00716484	0.0732958	-3.27664
ENSG00000123119.11	protein_coding	NECAB1	2	OTTHUMG00000164009.1	chr8	HAVANA	gene	90791550	90959408	+	0.753853	1.68629	2.3887	2.7903	0.0125306	0.105878	-3.27788
ENSG00000170579.16	protein_coding	DLGAP1	1	OTTHUMG00000131537.11	chr18	HAVANA	gene	3496032	4455335	-	2.44636	5.45038	-0.849587	2.45567	0.0250815	0.162751	-3.27882
ENSG00000126705.14	protein_coding	AHDC1	2	OTTHUMG00000003398.5	chr1	HAVANA	gene	27534035	27604431	-	0.561187	1.47548	3.3021	2.88217	0.0103202	0.0932261	-3.27997
ENSG00000171357.5	protein_coding	LURAP1	2	OTTHUMG00000007605.1	chr1	HAVANA	gene	46203334	46221261	+	1.50977	2.84764	-0.16208	2.50703	0.0225817	0.152948	-3.28047
ENSG00000177889.9	protein_coding	UBE2N	1	OTTHUMG00000170156.4	chr12	HAVANA	gene	93405673	93442262	-	-0.40776	0.753793	7.5002	-3.15282	0.00578925	0.062781	-3.2811
ENSG00000186193.8	protein_coding	SAPCD2	2	OTTHUMG00000020961.3	chr9	HAVANA	gene	137062124	137070588	-	-0.416929	0.749018	4.90262	-3.04277	0.0073307	0.0744306	-3.28378
ENSG00000110108.9	protein_coding	TMEM109	2	OTTHUMG00000167801.1	chr11	HAVANA	gene	60913874	60923443	+	-0.420709	0.747058	7.75293	-3.15297	0.00578743	0.062781	-3.28455
ENSG00000111364.15	protein_coding	DDX55	2	OTTHUMG00000168695.2	chr12	HAVANA	gene	123602077	123620941	+	-0.412101	0.751528	5.71092	-3.08123	0.00675114	0.0701225	-3.28627
ENSG00000148175.12	protein_coding	STOM	2	OTTHUMG00000020590.1	chr9	HAVANA	gene	121338988	121370304	-	-0.42257	0.746094	5.90491	-3.09942	0.0064929	0.0682006	-3.28754
ENSG00000151882.11	protein_coding	CCL28	1	OTTHUMG00000094811.3	chr5	HAVANA	gene	43376645	43412391	-	0.726565	1.65469	4.19663	2.96562	0.00864338	0.0833848	-3.28859
ENSG00000125652.7	protein_coding	ALKBH7	2	OTTHUMG00000180792.2	chr19	HAVANA	gene	6372433	6375251	+	0.413147	1.33159	6.00459	3.09369	0.00657318	0.0689467	-3.28952
ENSG00000079931.14	protein_coding	MOXD1	1	OTTHUMG00000055853.4	chr6	HAVANA	gene	132296055	132401545	-	1.5628	2.95426	1.1448	2.57802	0.019512	0.139552	-3.28968
ENSG00000279453.1	TEC	RP3-425C14.4	2	OTTHUMG00000175939.1	chr6	HAVANA	gene	122436789	122439223	-	-1.95333	0.25822	0.653485	-2.54379	0.0209391	0.145432	-3.29102
ENSG00000049089.14	protein_coding	COL9A2	2	OTTHUMG00000005761.6	chr1	HAVANA	gene	40300487	40317813	-	1.61808	3.06966	0.800156	2.53931	0.0211329	0.145996	-3.29344
ENSG00000136052.9	protein_coding	SLC41A2	2	OTTHUMG00000156965.5	chr12	HAVANA	gene	104802553	104958744	-	0.932632	1.90876	3.66672	2.89271	0.0100922	0.0922284	-3.29358
ENSG00000094804.9	protein_coding	CDC6	2	OTTHUMG00000133324.4	chr17	HAVANA	gene	40287633	40304657	+	-0.42175	0.746519	4.66987	-3.02295	0.00764804	0.0766604	-3.29893
ENSG00000103404.14	protein_coding	USP31	1	OTTHUMG00000094793.6	chr16	HAVANA	gene	23061406	23149270	-	-0.683561	0.622627	2.99655	-2.86865	0.0106201	0.0950703	-3.29906
ENSG00000149582.15	protein_coding	TMEM25	1	OTTHUMG00000166339.3	chr11	HAVANA	gene	118531041	118547280	+	0.894505	1.85897	2.10141	2.71898	0.0145541	0.116253	-3.29951
ENSG00000015475.18	protein_coding	BID	2	OTTHUMG00000150087.5	chr22	HAVANA	gene	17734138	17774770	-	0.38564	1.30644	7.60198	3.14249	0.00591933	0.0640258	-3.30092
ENSG00000122574.10	protein_coding	WIPF3	1	OTTHUMG00000152761.1	chr7	HAVANA	gene	29806486	29917066	+	0.698158	1.62243	2.5051	2.74984	0.0136427	0.111974	-3.30172
ENSG00000123405.13	protein_coding	NFE2	2	OTTHUMG00000169761.1	chr12	HAVANA	gene	54292111	54301121	-	0.798637	1.73946	3.58504	2.85418	0.0109503	0.0968963	-3.30357
ENSG00000275719.1	antisense	CTB-147N14.6	2	OTTHUMG00000186769.1	chr19	HAVANA	gene	46787815	46789043	+	0.988314	1.98387	0.760774	2.55474	0.0204722	0.143459	-3.30452
ENSG00000134853.11	protein_coding	PDGFRA	2	OTTHUMG00000128699.5	chr4	HAVANA	gene	54229097	54298247	+	-1.56639	0.337651	0.46849	-2.59935	0.0186703	0.136346	-3.30497
ENSG00000212719.10	protein_coding	C17orf51	1	OTTHUMG00000186498.2	chr17	HAVANA	gene	21524790	21574458	-	-0.539968	0.687786	3.83484	-2.93759	0.00917476	0.0866602	-3.30506
ENSG00000024422.11	protein_coding	EHD2	2	OTTHUMG00000183266.1	chr19	HAVANA	gene	47713343	47743134	+	0.520768	1.43472	5.82372	3.04403	0.00731097	0.0742808	-3.30603
ENSG00000167550.10	protein_coding	RHEBL1	2	OTTHUMG00000170407.2	chr12	HAVANA	gene	49064685	49070025	-	-1.46773	0.36155	0.941	-2.6343	0.0173651	0.12971	-3.30624
ENSG00000181523.12	protein_coding	SGSH	2	OTTHUMG00000177569.3	chr17	HAVANA	gene	80206716	80220923	-	-0.824074	0.564845	2.77602	-2.82274	0.0117024	0.101233	-3.30631
ENSG00000248187.1	lincRNA	RP11-184M15.1	2	OTTHUMG00000161178.1	chr4	HAVANA	gene	128567972	128570531	-	-2.41039	0.188105	-1.25628	-2.44269	0.0257535	0.165028	-3.3066
ENSG00000163701.18	protein_coding	IL17RE	2	OTTHUMG00000128649.4	chr3	HAVANA	gene	9902612	9916402	+	1.07943	2.11321	1.46962	2.64969	0.0168183	0.127441	-3.30943
ENSG00000129493.14	protein_coding	HEATR5A	1	OTTHUMG00000169043.4	chr14	HAVANA	gene	31291791	31420582	-	0.508116	1.42219	5.27959	3.01442	0.00778883	0.0776538	-3.3126
ENSG00000095637.21	protein_coding	SORBS1	2	OTTHUMG00000018812.8	chr10	HAVANA	gene	95311771	95561414	-	1.46649	2.76349	-0.229483	2.54299	0.0209738	0.145469	-3.31336
ENSG00000006118.14	protein_coding	TMEM132A	1	OTTHUMG00000167803.2	chr11	HAVANA	gene	60924463	60937159	+	-0.711458	0.610703	4.45331	-2.98225	0.00834241	0.0815903	-3.31371
ENSG00000231711.2	processed_transcript	RP11-398F12.1	1	OTTHUMG00000150406.2	chr22	HAVANA	gene	46039907	46044853	-	0.997273	1.99622	1.83615	2.65191	0.0167408	0.126983	-3.31467
ENSG00000167642.12	protein_coding	SPINT2	1	OTTHUMG00000181891.3	chr19	HAVANA	gene	38244035	38292614	+	0.802397	1.744	2.30217	2.70769	0.0149021	0.117991	-3.31472
ENSG00000149212.11	protein_coding	SESN3	1	OTTHUMG00000167829.5	chr11	HAVANA	gene	95165513	95232541	-	1.34986	2.54887	0.220986	2.53541	0.0213033	0.146731	-3.31587
ENSG00000167173.18	protein_coding	C15orf39	2	OTTHUMG00000142820.4	chr15	HAVANA	gene	75195643	75212169	+	-0.605587	0.657204	3.85943	-2.95535	0.00883438	0.0845163	-3.31622
ENSG00000108474.16	protein_coding	PIGL	1	OTTHUMG00000059346.10	chr17	HAVANA	gene	16217191	16351797	+	-0.560971	0.677846	4.20595	-2.96567	0.00864244	0.0833848	-3.32014
ENSG00000170500.12	protein_coding	LONRF2	2	OTTHUMG00000130668.3	chr2	HAVANA	gene	100273291	100322733	-	1.83787	3.57481	-0.4677	2.45521	0.0251052	0.162834	-3.32109
ENSG00000127580.15	protein_coding	WDR24	2	OTTHUMG00000090421.2	chr16	HAVANA	gene	684622	690444	-	-0.767494	0.587437	3.12957	-2.84938	0.011062	0.0977347	-3.32149
ENSG00000272894.5	lincRNA	RP5-1159O4.1	2	OTTHUMG00000186149.1	chr7	HAVANA	gene	7552462	7566996	-	1.36391	2.57382	0.0317793	2.49202	0.0232866	0.155505	-3.3228
ENSG00000280832.1	antisense	ST3GAL4-AS1	2	OTTHUMG00000189590.1	chr11	HAVANA	gene	126340889	126355587	-	0.592457	1.50781	3.79896	2.88464	0.0102663	0.0929299	-3.32624
ENSG00000107404.19	protein_coding	DVL1	2	OTTHUMG00000003069.4	chr1	HAVANA	gene	1335276	1349350	-	-0.45508	0.72947	6.41088	-3.09125	0.00660773	0.069163	-3.32689
ENSG00000145685.13	protein_coding	LHFPL2	1	OTTHUMG00000107579.4	chr5	HAVANA	gene	78485215	78770021	-	0.390902	1.31121	5.45142	3.06532	0.00698534	0.0718044	-3.33052
ENSG00000234618.1	processed_pseudogene	RP11-422N19.3	1	OTTHUMG00000020041.1	chr9	HAVANA	gene	76398699	76399586	+	1.35223	2.55307	-0.582411	2.46069	0.0248261	0.161958	-3.33095
ENSG00000112167.9	protein_coding	SAYSD1	2	OTTHUMG00000014641.1	chr6	HAVANA	gene	39104064	39115189	-	0.557156	1.47137	3.44512	2.87897	0.0103905	0.0935771	-3.332
ENSG00000135093.12	protein_coding	USP30	1	OTTHUMG00000133613.5	chr12	HAVANA	gene	109023089	109088026	+	0.652868	1.57229	4.32838	2.93928	0.00914189	0.0865709	-3.33249
ENSG00000260708.1	antisense	CTA-29F11.1	2	OTTHUMG00000172744.1	chr22	HAVANA	gene	46761894	46762563	-	-0.666643	0.629971	2.60599	-2.82708	0.0115957	0.100773	-3.3334
ENSG00000068745.14	protein_coding	IP6K2	1	OTTHUMG00000133543.6	chr3	HAVANA	gene	48688003	48740353	-	0.505848	1.41996	5.98234	3.06338	0.00701441	0.0720536	-3.334
ENSG00000139899.10	protein_coding	CBLN3	1	OTTHUMG00000171315.1	chr14	HAVANA	gene	24426532	24430954	-	1.67639	3.19628	-0.830437	2.4351	0.026154	0.166592	-3.33498
ENSG00000167524.14	protein_coding	SGK494	2	OTTHUMG00000179342.30	chr17	HAVANA	gene	28607964	28614200	-	-2.22209	0.214331	-1.28213	-2.43909	0.0259425	0.16574	-3.33907
ENSG00000178999.12	protein_coding	AURKB	1	OTTHUMG00000108189.5	chr17	HAVANA	gene	8204733	8210600	-	-0.442317	0.735952	5.89431	-3.07142	0.00689467	0.0711177	-3.33971
ENSG00000257732.1	antisense	RP11-818F20.5	2	OTTHUMG00000170178.1	chr12	HAVANA	gene	104262314	104280722	-	0.739455	1.66954	2.93905	2.79667	0.0123636	0.104764	-3.34431
ENSG00000188687.17	protein_coding	SLC4A5	1	OTTHUMG00000090263.7	chr2	HAVANA	gene	74216242	74343414	-	2.04762	4.13422	-0.549548	2.4236	0.0267722	0.168738	-3.34774
ENSG00000147650.11	protein_coding	LRP12	2	OTTHUMG00000164892.6	chr8	HAVANA	gene	104489231	104589024	-	-0.672305	0.627503	3.88149	-2.92818	0.00936009	0.0879094	-3.34902
ENSG00000172006.11	protein_coding	ZNF554	2	OTTHUMG00000180493.5	chr19	HAVANA	gene	2819874	2835773	+	1.2081	2.31034	0.389962	2.51221	0.022343	0.151926	-3.34927
ENSG00000231107.1	lincRNA	RP11-389K14.3	2	OTTHUMG00000020194.1	chr9	HAVANA	gene	90300902	90433505	-	2.19016	4.56356	-1.48316	2.40619	0.0277346	0.173153	-3.3494
ENSG00000213889.10	protein_coding	PPM1N	1	OTTHUMG00000140397.7	chr19	HAVANA	gene	45488777	45502510	+	0.88156	1.84237	1.54428	2.62186	0.0178191	0.132202	-3.35218
ENSG00000175536.6	protein_coding	LIPT2	1	OTTHUMG00000165646.2	chr11	HAVANA	gene	74491712	74493733	-	1.28351	2.4343	0.171121	2.51254	0.0223278	0.151926	-3.35301
ENSG00000130508.10	protein_coding	PXDN	2	OTTHUMG00000059697.4	chr2	HAVANA	gene	1631887	1744852	-	-2.4495	0.183074	-0.315994	-2.42461	0.0267175	0.168525	-3.35396
ENSG00000082497.11	protein_coding	SERTAD4	2	OTTHUMG00000036391.1	chr1	HAVANA	gene	210232799	210246631	+	-0.843749	0.557194	1.34685	-2.70988	0.0148339	0.117563	-3.35641
ENSG00000228536.2	lincRNA	RP11-392O17.1	2	OTTHUMG00000041231.2	chr1	HAVANA	gene	219409523	219459369	-	-1.85156	0.277092	-2.1012	-2.40804	0.0276308	0.172823	-3.35734
ENSG00000131773.13	protein_coding	KHDRBS3	2	OTTHUMG00000164164.4	chr8	HAVANA	gene	135457457	135656722	+	-1.95392	0.258115	-0.213196	-2.45126	0.025308	0.163368	-3.36181
ENSG00000137070.17	protein_coding	IL11RA	1	OTTHUMG00000019837.7	chr9	HAVANA	gene	34650702	34661892	+	1.00775	2.01078	2.18435	2.68572	0.015602	0.121481	-3.36428
ENSG00000104064.17	protein_coding	GABPB1	1	OTTHUMG00000131642.4	chr15	HAVANA	gene	50275392	50355408	-	-0.580381	0.668787	4.38088	-2.95949	0.00875685	0.0840985	-3.36607
ENSG00000084070.11	protein_coding	SMAP2	2	OTTHUMG00000007301.6	chr1	HAVANA	gene	40344850	40423326	+	-0.411988	0.751587	5.0992	-3.00852	0.00788757	0.078211	-3.36967
ENSG00000187608.8	protein_coding	ISG15	2	OTTHUMG00000040777.3	chr1	HAVANA	gene	1001138	1014541	+	0.467533	1.38274	7.89746	3.11021	0.00634428	0.0671567	-3.37045
ENSG00000234684.6	antisense	RP11-314N13.4	2	OTTHUMG00000031671.2	chr20	HAVANA	gene	1325405	1378734	+	0.51201	1.42604	3.29448	2.81935	0.0117862	0.101604	-3.37516
ENSG00000165060.12	protein_coding	FXN	2	OTTHUMG00000019977.11	chr9	HAVANA	gene	69035259	69120427	+	0.457216	1.37289	5.14894	2.99625	0.00809697	0.0797656	-3.37722
ENSG00000233006.6	processed_transcript	AC034220.3	2	OTTHUMG00000059646.4	chr5	HAVANA	gene	132311285	132369916	-	1.04598	2.06476	1.36341	2.5824	0.0193364	0.13903	-3.37866
ENSG00000215790.7	protein_coding	SLC35E2	2	OTTHUMG00000000823.6	chr1	HAVANA	gene	1724838	1745999	-	0.948946	1.93046	1.59772	2.59511	0.0188348	0.137077	-3.37893
ENSG00000185519.8	protein_coding	FAM131C	2	OTTHUMG00000009525.1	chr1	HAVANA	gene	16057769	16073632	-	-1.05876	0.480044	0.423648	-2.50951	0.0224672	0.152493	-3.37963
ENSG00000253552.7	antisense	HOXA-AS2	1	OTTHUMG00000063274.5	chr7	HAVANA	gene	27107777	27134302	+	-0.752633	0.593519	2.21626	-2.7404	0.0139155	0.113215	-3.3816
ENSG00000272948.2	antisense	AP001412.1	2	OTTHUMG00000186494.2	chr21	HAVANA	gene	37267784	37268497	+	1.30219	2.46604	0.412411	2.48837	0.0234612	0.156042	-3.38211
ENSG00000213300.5	processed_pseudogene	RP11-642N14.1	1	OTTHUMG00000158819.1	chr3	HAVANA	gene	75214631	75215636	+	1.01159	2.01613	0.711313	2.56587	0.0200077	0.141525	-3.38924
ENSG00000119699.7	protein_coding	TGFB3	1	OTTHUMG00000171489.1	chr14	HAVANA	gene	75958099	75982991	-	0.878662	1.83867	2.50994	2.74009	0.0139245	0.113226	-3.38987
ENSG00000145949.10	protein_coding	MYLK4	2	OTTHUMG00000014121.4	chr6	HAVANA	gene	2663629	2750966	-	2.02643	4.07396	-0.537593	2.40394	0.0278613	0.173464	-3.39205
ENSG00000283294.1	processed_transcript	RP11-681B3.4	2	OTTHUMG00000157172.5	chr18	HAVANA	gene	14225224	14342505	+	-1.09812	0.467124	0.412322	-2.54969	0.0206863	0.144363	-3.3926
ENSG00000166548.15	protein_coding	TK2	2	OTTHUMG00000137499.10	chr16	HAVANA	gene	66508003	66552544	-	-0.463043	0.725454	3.92242	-2.91689	0.00958732	0.0893119	-3.39431
ENSG00000124406.16	protein_coding	ATP8A1	2	OTTHUMG00000099403.3	chr4	HAVANA	gene	42408373	42657105	-	1.64001	3.11667	-0.641797	2.40671	0.0277053	0.173071	-3.39658
ENSG00000120832.9	protein_coding	MTERFD3	1	OTTHUMG00000170007.3	chr12	HAVANA	gene	106977291	106987166	-	0.705899	1.63116	3.97169	2.89454	0.0100531	0.0919743	-3.39677
ENSG00000151849.14	protein_coding	CENPJ	2	OTTHUMG00000016595.1	chr13	HAVANA	gene	24882284	24922889	-	-0.579953	0.668986	3.93816	-2.90947	0.00973957	0.090335	-3.39696
ENSG00000109472.13	protein_coding	CPE	2	OTTHUMG00000150252.3	chr4	HAVANA	gene	165361194	165498320	+	0.429756	1.34701	6.42878	3.05276	0.00717573	0.0733568	-3.40112
ENSG00000117305.14	protein_coding	HMGCL	1	OTTHUMG00000002963.4	chr1	HAVANA	gene	23801885	23838620	-	0.472557	1.38757	5.09824	2.96414	0.00867061	0.0835394	-3.40126
ENSG00000134873.9	protein_coding	CLDN10	2	OTTHUMG00000017217.3	chr13	HAVANA	gene	95433604	95579759	+	-0.786682	0.579676	1.5455	-2.71059	0.0148119	0.117556	-3.40142
ENSG00000107371.12	protein_coding	EXOSC3	2	OTTHUMG00000019932.3	chr9	HAVANA	gene	37766978	37801437	-	-0.399499	0.758122	7.29163	-3.09064	0.00661636	0.0692048	-3.40142
ENSG00000159224.4	protein_coding	GIP	2	OTTHUMG00000161171.1	chr17	HAVANA	gene	48958554	48968596	-	1.63892	3.11433	0.202283	2.47146	0.0242863	0.159606	-3.40211
ENSG00000275226.1	lincRNA	LINC00547	2	OTTHUMG00000187339.1	chr13	HAVANA	gene	37534940	37551536	+	-1.26707	0.415503	-0.21156	-2.45885	0.0249193	0.162241	-3.40454
ENSG00000172671.19	protein_coding	ZFAND4	1	OTTHUMG00000018085.7	chr10	HAVANA	gene	45615501	45672780	-	0.723006	1.65062	2.05001	2.68253	0.015706	0.122044	-3.40501
ENSG00000166831.8	protein_coding	RBPMS2	2	OTTHUMG00000172423.2	chr15	HAVANA	gene	64739892	64775587	-	-0.615515	0.652697	4.25658	-2.92206	0.00948261	0.0886689	-3.40538
ENSG00000145526.11	protein_coding	CDH18	1	OTTHUMG00000090578.4	chr5	HAVANA	gene	19472951	20575873	-	1.77022	3.41106	0.198864	2.45005	0.0253702	0.163597	-3.40894
ENSG00000142002.17	protein_coding	DPP9	1	OTTHUMG00000182040.8	chr19	HAVANA	gene	4675224	4724673	-	-0.364455	0.776762	6.55972	-3.06244	0.00702853	0.0721489	-3.40951
ENSG00000136104.20	protein_coding	RNASEH2B	2	OTTHUMG00000016937.15	chr13	HAVANA	gene	50909678	51024120	+	0.34091	1.26656	6.90077	3.07095	0.00690149	0.0711388	-3.41356
ENSG00000132382.14	protein_coding	MYBBP1A	2	OTTHUMG00000090747.3	chr17	HAVANA	gene	4538897	4555631	-	-0.505899	0.704221	5.76081	-3.02535	0.00760901	0.0763212	-3.41579
ENSG00000175745.12	protein_coding	NR2F1	1	OTTHUMG00000119079.4	chr5	HAVANA	gene	93583224	93594615	+	0.411027	1.32963	4.77414	2.95899	0.00876619	0.084134	-3.41624
ENSG00000171497.4	protein_coding	PPID	2	OTTHUMG00000161927.3	chr4	HAVANA	gene	158709134	158723396	-	-0.540256	0.687649	4.34037	-2.94856	0.00896302	0.0854727	-3.41888
ENSG00000114126.17	protein_coding	TFDP2	2	OTTHUMG00000164975.4	chr3	HAVANA	gene	141944428	142149544	-	0.339348	1.26518	5.89288	3.02574	0.00760264	0.0763212	-3.41893
ENSG00000115946.7	protein_coding	PNO1	2	OTTHUMG00000129563.2	chr2	HAVANA	gene	68157844	68176238	+	-0.326247	0.797609	6.7975	-3.06544	0.00698349	0.0718044	-3.41908
ENSG00000117395.12	protein_coding	EBNA1BP2	2	OTTHUMG00000007284.2	chr1	HAVANA	gene	43164175	43270936	-	-0.405878	0.754777	9.64275	-3.1173	0.00624842	0.0665168	-3.42164
ENSG00000182600.9	protein_coding	C2orf82	1	OTTHUMG00000133273.6	chr2	HAVANA	gene	232857270	232878708	+	0.972332	1.96201	2.03214	2.60589	0.0184191	0.13504	-3.42177
ENSG00000140374.15	protein_coding	ETFA	1	OTTHUMG00000172586.6	chr15	HAVANA	gene	76215355	76311472	-	0.386375	1.30711	9.458	3.11738	0.0062474	0.0665168	-3.42193
ENSG00000005469.11	protein_coding	CROT	1	OTTHUMG00000023653.5	chr7	HAVANA	gene	87345681	87399795	+	0.480487	1.39521	4.74141	2.95109	0.0089149	0.0851773	-3.42204
ENSG00000260669.2	processed_transcript	AL136419.6	2	OTTHUMG00000029324.4	chr14	HAVANA	gene	24209646	24215987	-	-1.61064	0.327453	-0.905201	-2.40473	0.0278169	0.173405	-3.42333
ENSG00000119231.10	protein_coding	SENP5	1	OTTHUMG00000155527.1	chr3	HAVANA	gene	196867856	196934714	+	-0.498481	0.707851	4.06548	-2.89037	0.0101424	0.0924038	-3.42344
ENSG00000225131.2	processed_pseudogene	RP11-278A16.1	1	OTTHUMG00000016907.1	chr13	HAVANA	gene	48771128	48771827	+	1.03893	2.05471	0.774374	2.53019	0.021533	0.147971	-3.42424
ENSG00000131781.12	protein_coding	FMO5	2	OTTHUMG00000014607.4	chr1	HAVANA	gene	147175351	147243050	-	1.85956	3.62896	0.230378	2.43303	0.0262643	0.167152	-3.42753
ENSG00000153558.14	protein_coding	FBXL2	2	OTTHUMG00000130745.7	chr3	HAVANA	gene	33277025	33403662	+	0.728159	1.65652	2.49423	2.68978	0.0154704	0.120939	-3.43186
ENSG00000069020.18	protein_coding	MAST4	1	OTTHUMG00000152471.6	chr5	HAVANA	gene	66596361	67169595	+	-1.23158	0.425852	1.11243	-2.55685	0.0203833	0.143168	-3.43352
ENSG00000167604.14	protein_coding	NFKBID	1	OTTHUMG00000180760.7	chr19	HAVANA	gene	35887653	35902303	-	-0.570971	0.673164	2.89346	-2.77852	0.012845	0.107402	-3.43565
ENSG00000180592.16	protein_coding	SKIDA1	2	OTTHUMG00000017797.4	chr10	HAVANA	gene	21513478	21526368	-	1.37883	2.60057	0.957755	2.51118	0.0223903	0.152109	-3.4376
ENSG00000197905.8	protein_coding	TEAD4	2	OTTHUMG00000168153.2	chr12	HAVANA	gene	2959330	3040673	+	-0.346682	0.786391	5.21425	-2.98696	0.00825903	0.0809874	-3.43864
ENSG00000244578.1	lincRNA	RP11-548O1.3	1	OTTHUMG00000159892.1	chr3	HAVANA	gene	138935189	138944020	-	2.00842	4.02341	-1.66116	2.34488	0.0313873	0.187245	-3.44683
ENSG00000185800.11	protein_coding	DMWD	1	OTTHUMG00000169044.3	chr19	HAVANA	gene	45782947	45792802	-	-0.571509	0.672912	4.65558	-2.91731	0.00957884	0.0892887	-3.44782
ENSG00000198885.9	protein_coding	ITPRIPL1	2	OTTHUMG00000155230.4	chr2	HAVANA	gene	96325331	96330517	+	-0.693786	0.618229	2.44403	-2.72737	0.0143006	0.114968	-3.44831
ENSG00000181404.16	protein_coding	WASHC1	2	OTTHUMG00000019420.4	chr9	HAVANA	gene	14521	73865	-	-1.46739	0.361636	0.419068	-2.4522	0.0252592	0.163123	-3.44878
ENSG00000141431.11	protein_coding	ASXL3	2	OTTHUMG00000178395.14	chr18	HAVANA	gene	33578233	33751192	+	1.50144	2.83126	-0.540604	2.43135	0.026354	0.167436	-3.44972
ENSG00000113504.20	protein_coding	SLC12A7	2	OTTHUMG00000161931.9	chr5	HAVANA	gene	1050376	1112035	-	0.470185	1.38529	5.92833	3.01124	0.00784186	0.077974	-3.45032
ENSG00000121413.12	protein_coding	ZSCAN18	2	OTTHUMG00000183451.2	chr19	HAVANA	gene	58083838	58118427	-	0.637031	1.55513	2.69472	2.72447	0.0143879	0.115358	-3.45067
ENSG00000267733.5	transcribed_processed_pseudogene	RP11-64C12.3	2	OTTHUMG00000180718.1	chr18	HAVANA	gene	12201982	12223539	+	1.74023	3.34088	-0.914504	2.36405	0.0301995	0.182903	-3.45075
ENSG00000232938.2	transcribed_processed_pseudogene	AC139099.3	1	OTTHUMG00000177777.1	chr17	HAVANA	gene	83226897	83240804	+	-0.80212	0.573506	1.56235	-2.59568	0.0188125	0.136981	-3.45338
ENSG00000182310.14	protein_coding	SPACA6	2	OTTHUMG00000177373.5	chr19	HAVANA	gene	51689128	51712387	+	0.617584	1.5343	3.22349	2.80222	0.0122198	0.103849	-3.45428
ENSG00000145945.5	protein_coding	FAM50B	2	OTTHUMG00000014147.1	chr6	HAVANA	gene	3849386	3851317	+	0.453095	1.36897	4.33007	2.87911	0.0103874	0.0935771	-3.45998
ENSG00000277586.2	protein_coding	NEFL	2	OTTHUMG00000134284.9	chr8	HAVANA	gene	24950955	24957110	-	0.991152	1.98777	3.72229	2.70324	0.0150414	0.11862	-3.46021
ENSG00000245275.7	antisense	CTB-157D17.1	2	OTTHUMG00000163570.2	chr5	HAVANA	gene	154329437	154445850	-	-0.978672	0.507446	1.58344	-2.60796	0.0183401	0.13466	-3.46188
ENSG00000132639.12	protein_coding	SNAP25	2	OTTHUMG00000031863.3	chr20	HAVANA	gene	10218830	10307418	+	-1.50903	0.351348	-0.810958	-2.44487	0.0256393	0.164484	-3.46281
ENSG00000182612.10	protein_coding	TSPAN10	2	OTTHUMG00000178037.4	chr17	HAVANA	gene	81637171	81648749	+	1.12555	2.18185	0.655872	2.41436	0.0272791	0.171054	-3.46311
ENSG00000164647.8	protein_coding	STEAP1	2	OTTHUMG00000023006.6	chr7	HAVANA	gene	90154375	90164829	+	-0.452763	0.730642	6.7156	-3.04661	0.00727071	0.0740232	-3.46313
ENSG00000089639.10	protein_coding	GMIP	2	OTTHUMG00000182329.2	chr19	HAVANA	gene	19629476	19643667	-	0.687499	1.61049	3.7553	2.80432	0.0121658	0.103678	-3.46348
ENSG00000188215.9	protein_coding	DCUN1D3	2	OTTHUMG00000131553.3	chr16	HAVANA	gene	20854925	20900384	-	-0.849526	0.554967	2.03959	-2.68451	0.0156413	0.121677	-3.46522
ENSG00000183111.11	protein_coding	ARHGEF37	2	OTTHUMG00000163491.2	chr5	HAVANA	gene	149551947	149634968	+	1.47402	2.77795	0.90447	2.45349	0.0251933	0.162997	-3.46549
ENSG00000198039.11	protein_coding	ZNF273	1	OTTHUMG00000149837.3	chr7	HAVANA	gene	64870172	64930966	+	0.79826	1.739	2.82799	2.73938	0.0139452	0.113281	-3.46702
ENSG00000125122.15	protein_coding	AC040160.13	1	OTTHUMG00000154403.3	chr16	HAVANA	gene	67207139	67227048	-	0.893885	1.85817	1.94113	2.58192	0.0193557	0.139101	-3.46848
ENSG00000102401.19	protein_coding	ARMCX3	2	OTTHUMG00000022035.3	chrX	HAVANA	gene	101622797	101627843	+	0.571398	1.48596	4.68273	2.92103	0.00950341	0.0888078	-3.46966
ENSG00000167740.9	protein_coding	CYB5D2	2	OTTHUMG00000177726.3	chr17	HAVANA	gene	4143168	4187310	+	0.36626	1.28901	5.5184	2.9738	0.00849398	0.0825605	-3.46977
ENSG00000245060.6	lincRNA	CTC-205M6.2	1	OTTHUMG00000162270.1	chr5	HAVANA	gene	180830957	180835726	+	0.630806	1.54843	3.61065	2.81683	0.0118492	0.10197	-3.46979
ENSG00000152402.10	protein_coding	GUCY1A2	2	OTTHUMG00000166296.2	chr11	HAVANA	gene	106674012	107018524	-	1.79446	3.46887	-0.763657	2.37308	0.029655	0.180818	-3.47161
ENSG00000111837.11	protein_coding	MAK	2	OTTHUMG00000014247.2	chr6	HAVANA	gene	10762723	10838555	-	1.29698	2.45713	0.234419	2.43082	0.0263825	0.167547	-3.4729
ENSG00000255435.6	antisense	RP11-770J1.3	2	OTTHUMG00000166407.2	chr11	HAVANA	gene	118511911	118531094	-	1.6783	3.2005	-1.10579	2.34979	0.0310794	0.18604	-3.47307
ENSG00000198088.10	protein_coding	NUP62CL	2	OTTHUMG00000022159.4	chrX	HAVANA	gene	107123427	107206433	-	-0.980745	0.506718	1.37455	-2.58404	0.019271	0.138627	-3.47391
ENSG00000214401.4	antisense	RP11-197O15.1	2	OTTHUMG00000178028.2	chr17	HAVANA	gene	46193576	46196723	+	0.610248	1.52652	4.05455	2.82425	0.0116651	0.101028	-3.47406
ENSG00000083750.12	protein_coding	RRAGB	2	OTTHUMG00000021662.2	chrX	HAVANA	gene	55717739	55758774	+	0.914769	1.88527	1.57331	2.58534	0.0192192	0.13843	-3.47733
ENSG00000177138.15	protein_coding	FAM9B	2	OTTHUMG00000021114.3	chrX	HAVANA	gene	9024232	9164639	-	-1.54383	0.342973	-1.06547	-2.34166	0.0315913	0.187672	-3.47952
ENSG00000251359.4	lincRNA	RP11-335L23.3	2	OTTHUMG00000160677.1	chr4	HAVANA	gene	183097017	183099199	-	1.32473	2.50485	-0.287128	2.38238	0.0291033	0.178585	-3.48001
ENSG00000109738.10	protein_coding	GLRB	2	OTTHUMG00000161954.1	chr4	HAVANA	gene	157076057	157172090	+	0.657894	1.57778	3.36501	2.78778	0.0125972	0.106232	-3.48193
ENSG00000169228.13	protein_coding	RAB24	2	OTTHUMG00000130849.5	chr5	HAVANA	gene	177301198	177303744	-	-1.41451	0.375136	0.758695	-2.4846	0.0236432	0.15697	-3.48288
ENSG00000065526.10	protein_coding	SPEN	2	OTTHUMG00000009376.2	chr1	HAVANA	gene	15847864	15940460	+	-0.430909	0.741794	5.66646	-2.98794	0.00824165	0.0809234	-3.48382
ENSG00000168566.12	protein_coding	SNRNP48	2	OTTHUMG00000014213.4	chr6	HAVANA	gene	7590199	7611967	+	-0.495309	0.70941	4.11616	-2.88299	0.0103023	0.0931772	-3.48592
ENSG00000163590.13	protein_coding	PPM1L	2	OTTHUMG00000159048.2	chr3	HAVANA	gene	160755602	161078907	+	0.671409	1.59263	2.79889	2.71997	0.0145239	0.116074	-3.48702
ENSG00000089050.15	protein_coding	RBBP9	2	OTTHUMG00000031972.4	chr20	HAVANA	gene	18486540	18497243	-	0.576349	1.49107	4.37245	2.89112	0.0101264	0.0923144	-3.48809
ENSG00000267321.2	lincRNA	RP11-1094M14.11	2	OTTHUMG00000179915.2	chr17	HAVANA	gene	35568109	35574843	+	-0.586603	0.665909	3.76907	-2.83742	0.0113452	0.0990583	-3.49025
ENSG00000198585.11	protein_coding	NUDT16	2	OTTHUMG00000159623.11	chr3	HAVANA	gene	131381671	131388830	+	0.414611	1.33294	4.88364	2.9308	0.00930809	0.0875875	-3.49025
ENSG00000115461.4	protein_coding	IGFBP5	2	OTTHUMG00000133058.3	chr2	HAVANA	gene	216672105	216695525	-	-1.24953	0.420584	1.05557	-2.44678	0.02554	0.164155	-3.49051
ENSG00000070495.14	protein_coding	JMJD6	1	OTTHUMG00000169267.3	chr17	HAVANA	gene	76712832	76726799	-	-0.475711	0.719112	5.85374	-2.99715	0.00808141	0.0796843	-3.49105
ENSG00000183346.6	protein_coding	C10orf107	2	OTTHUMG00000018295.4	chr10	HAVANA	gene	61662961	61766766	+	1.30227	2.46616	1.56561	2.52168	0.0219128	0.149684	-3.49282
ENSG00000250742.2	lincRNA	RP11-834C11.4	2	OTTHUMG00000160035.2	chr12	HAVANA	gene	54126098	54142493	+	2.21999	4.65889	-1.98367	2.3072	0.0338508	0.196169	-3.49368
ENSG00000137693.13	protein_coding	YAP1	1	OTTHUMG00000167322.3	chr11	HAVANA	gene	102110461	102233423	+	-0.505604	0.704365	3.97107	-2.86321	0.0107432	0.0956552	-3.49406
ENSG00000165923.15	protein_coding	AGBL2	1	OTTHUMG00000165368.7	chr11	HAVANA	gene	47659591	47715389	-	1.07661	2.10908	0.955953	2.45993	0.0248648	0.16198	-3.49507
ENSG00000111445.13	protein_coding	RFC5	2	OTTHUMG00000156438.4	chr12	HAVANA	gene	118013588	118033130	+	-0.355981	0.781338	5.91554	-3.00458	0.00795418	0.0787232	-3.49544
ENSG00000162366.7	protein_coding	PDZK1IP1	2	OTTHUMG00000007852.3	chr1	HAVANA	gene	47183593	47191044	-	1.35886	2.56483	0.102785	2.42665	0.0266068	0.168111	-3.49694
ENSG00000163866.8	protein_coding	SMIM12	2	OTTHUMG00000004375.3	chr1	HAVANA	gene	34712737	34859816	-	-0.358921	0.779747	5.34424	-2.96216	0.00870728	0.0837876	-3.50137
ENSG00000197461.13	protein_coding	PDGFA	1	OTTHUMG00000151412.6	chr7	HAVANA	gene	497258	520296	-	-0.375702	0.77073	5.25846	-2.95862	0.00877316	0.0841467	-3.5023
ENSG00000111012.9	protein_coding	CYP27B1	2	OTTHUMG00000170457.3	chr12	HAVANA	gene	57762334	57768986	-	0.866711	1.8235	1.72909	2.58935	0.0190606	0.137825	-3.50279
ENSG00000235618.7	transcribed_unprocessed_pseudogene	FAM21EP	1	OTTHUMG00000018221.1	chr10	HAVANA	gene	50021182	50067803	-	1.92065	3.78595	-0.162138	2.35595	0.0306965	0.184657	-3.503
ENSG00000085998.13	protein_coding	POMGNT1	2	OTTHUMG00000007604.2	chr1	HAVANA	gene	46188682	46220305	-	-0.390538	0.762845	6.22338	-3.00081	0.00801847	0.0792133	-3.50335
ENSG00000177119.15	protein_coding	ANO6	2	OTTHUMG00000169564.1	chr12	HAVANA	gene	45215987	45440404	+	-0.403993	0.755763	5.64242	-2.97903	0.00839976	0.0820436	-3.50984
ENSG00000198517.9	protein_coding	MAFK	2	OTTHUMG00000151453.2	chr7	HAVANA	gene	1530714	1543043	+	-1.19179	0.437761	0.33344	-2.41492	0.0272479	0.17093	-3.51013
ENSG00000125485.17	protein_coding	DDX31	2	OTTHUMG00000020843.3	chr9	HAVANA	gene	132592997	132670401	-	-0.426782	0.743919	5.05618	-2.93318	0.00926122	0.0873109	-3.51092
ENSG00000174963.17	protein_coding	ZIC4	1	OTTHUMG00000037281.8	chr3	HAVANA	gene	147386046	147406860	-	1.90414	3.74286	-0.795677	2.31345	0.0334303	0.194563	-3.51223
ENSG00000136826.14	protein_coding	KLF4	2	OTTHUMG00000020449.3	chr9	HAVANA	gene	107484852	107490482	-	-0.593768	0.66261	3.7684	-2.8261	0.0116197	0.100833	-3.51238
ENSG00000223382.4	lincRNA	RP5-1125N11.2	2	OTTHUMG00000003749.6	chr1	HAVANA	gene	30824228	30834431	+	1.74371	3.34896	-0.589046	2.3991	0.0281354	0.174587	-3.51308
ENSG00000007944.14	protein_coding	MYLIP	2	OTTHUMG00000016405.2	chr6	HAVANA	gene	16129125	16148248	+	-0.78191	0.581596	2.44087	-2.68777	0.0155353	0.121169	-3.51421
ENSG00000178695.5	protein_coding	KCTD12	2	OTTHUMG00000017096.3	chr13	HAVANA	gene	76880166	76886390	-	-1.93407	0.26169	-0.418309	-2.37394	0.0296036	0.180818	-3.51423
ENSG00000181045.14	protein_coding	SLC26A11	1	OTTHUMG00000133419.5	chr17	HAVANA	gene	80219699	80253500	+	-0.703754	0.613972	2.9795	-2.72595	0.0143434	0.115177	-3.51431
ENSG00000196312.13	protein_coding	MFSD14C	2	OTTHUMG00000020317.5	chr9	HAVANA	gene	96887373	97013708	-	0.514523	1.42852	4.11208	2.82791	0.0115753	0.100718	-3.51533
ENSG00000118785.13	protein_coding	SPP1	2	OTTHUMG00000130599.5	chr4	HAVANA	gene	87975650	87983426	+	0.434794	1.35172	8.26155	3.05233	0.00718238	0.0733745	-3.51819
ENSG00000232810.3	protein_coding	TNF	2	OTTHUMG00000031194.2	chr6	HAVANA	gene	31575567	31578336	+	1.55459	2.93751	-0.564503	2.33731	0.0318686	0.188571	-3.5197
ENSG00000184232.8	protein_coding	OAF	2	OTTHUMG00000166139.2	chr11	HAVANA	gene	120210767	120230332	+	-0.597748	0.660784	6.12893	-2.99421	0.00813216	0.0800082	-3.52307
ENSG00000267698.1	antisense	AC002116.7	2	OTTHUMG00000181746.1	chr19	HAVANA	gene	36014508	36045972	+	-1.06841	0.476844	1.41625	-2.51415	0.0222544	0.151532	-3.52501
ENSG00000150593.17	protein_coding	PDCD4	2	OTTHUMG00000019048.2	chr10	HAVANA	gene	110871795	110900006	+	0.979658	1.972	3.40955	2.73033	0.0142124	0.114692	-3.526
ENSG00000275703.1	lincRNA	U47924.32	2	OTTHUMG00000187114.1	chr12	HAVANA	gene	6899752	6900212	+	1.53289	2.89364	-0.641228	2.35674	0.0306473	0.18449	-3.53103
ENSG00000169857.7	protein_coding	AVEN	2	OTTHUMG00000129371.2	chr15	HAVANA	gene	33866227	34039176	-	0.446223	1.36247	4.97479	2.90658	0.00979959	0.0906463	-3.53319
ENSG00000123610.4	protein_coding	TNFAIP6	2	OTTHUMG00000131884.3	chr2	HAVANA	gene	151357592	151380048	+	-0.464104	0.724921	4.25182	-2.87563	0.0104642	0.0940141	-3.5337
ENSG00000073464.11	protein_coding	CLCN4	2	OTTHUMG00000021125.2	chrX	HAVANA	gene	10156945	10237660	+	-0.653162	0.635885	3.32458	-2.7773	0.012878	0.107546	-3.53601
ENSG00000148335.14	protein_coding	NTMT1	2	OTTHUMG00000020785.3	chr9	HAVANA	gene	129608884	129636131	+	-0.643674	0.640081	2.76246	-2.71602	0.0146445	0.116601	-3.53726
ENSG00000178852.15	protein_coding	EFCAB13	1	OTTHUMG00000164767.6	chr17	HAVANA	gene	47323290	47441312	+	-1.38668	0.382444	0.267708	-2.40264	0.0279346	0.173702	-3.53908
ENSG00000118495.18	protein_coding	PLAGL1	2	OTTHUMG00000015738.4	chr6	HAVANA	gene	143940300	144064599	-	0.546795	1.46084	4.13453	2.80991	0.0120233	0.102933	-3.54017
ENSG00000102547.18	protein_coding	CAB39L	2	OTTHUMG00000016914.5	chr13	HAVANA	gene	49308650	49444126	-	-0.86048	0.550769	1.99708	-2.61812	0.017958	0.133034	-3.5423
ENSG00000214706.10	protein_coding	IFRD2	2	OTTHUMG00000156935.3	chr3	HAVANA	gene	50287732	50292918	-	-0.57629	0.670686	4.01361	-2.83348	0.0114401	0.0996579	-3.54702
ENSG00000117461.14	protein_coding	PIK3R3	2	OTTHUMG00000008096.3	chr1	HAVANA	gene	46040140	46133036	-	0.963318	1.94979	2.48098	2.61069	0.0182367	0.134355	-3.54763
ENSG00000141696.12	protein_coding	P3H4	1	OTTHUMG00000133501.6	chr17	HAVANA	gene	41801947	41812604	-	-0.346887	0.786279	6.18459	-2.97854	0.00840863	0.0820584	-3.54774
ENSG00000087076.8	protein_coding	HSD17B14	1	OTTHUMG00000183328.1	chr19	HAVANA	gene	48813017	48836678	-	0.884223	1.84577	1.85223	2.54467	0.0209013	0.145305	-3.5484
ENSG00000173548.8	protein_coding	SNX33	2	OTTHUMG00000142835.2	chr15	HAVANA	gene	75647906	75662301	+	0.76782	1.7027	4.14532	2.82756	0.011584	0.100734	-3.54965
ENSG00000125384.6	protein_coding	PTGER2	2	OTTHUMG00000140300.2	chr14	HAVANA	gene	52314305	52328606	+	-0.650081	0.637245	2.99117	-2.7247	0.0143809	0.115358	-3.5502
ENSG00000133138.19	protein_coding	TBC1D8B	2	OTTHUMG00000022152.4	chrX	HAVANA	gene	106802680	106876145	+	-2.07078	0.238032	0.308816	-2.35517	0.0307445	0.18467	-3.55292
ENSG00000242759.6	lincRNA	RP11-280F2.2	1	OTTHUMG00000159196.2	chr3	HAVANA	gene	106836811	107240641	-	0.756537	1.68943	2.07973	2.62054	0.0178682	0.1325	-3.55341
ENSG00000166946.13	protein_coding	CCNDBP1	2	OTTHUMG00000130703.3	chr15	HAVANA	gene	43185118	43197176	+	0.356575	1.28038	6.55002	2.98515	0.00829089	0.081193	-3.55373
ENSG00000154380.17	protein_coding	ENAH	1	OTTHUMG00000037742.10	chr1	HAVANA	gene	225486835	225653142	-	-0.432087	0.741189	6.98409	-3.01049	0.0078545	0.0780476	-3.55379
ENSG00000137824.15	protein_coding	RMDN3	1	OTTHUMG00000130066.3	chr15	HAVANA	gene	40735884	40755851	-	-0.402469	0.756562	5.18235	-2.92212	0.00948149	0.0886689	-3.55506
ENSG00000154309.8	protein_coding	DISP1	2	OTTHUMG00000037893.2	chr1	HAVANA	gene	222872271	223005995	+	0.749257	1.68093	2.49846	2.64136	0.0171122	0.128882	-3.55666
ENSG00000108819.10	protein_coding	PPP1R9B	2	OTTHUMG00000162008.6	chr17	HAVANA	gene	50133735	50150630	-	-0.408407	0.753455	4.79595	-2.88756	0.010203	0.0926157	-3.55748
ENSG00000198911.11	protein_coding	SREBF2	1	OTTHUMG00000151261.2	chr22	HAVANA	gene	41833079	41907308	+	0.472295	1.38731	5.11978	2.90639	0.00980354	0.0906463	-3.55831
ENSG00000197603.13	protein_coding	C5orf42	2	OTTHUMG00000160492.2	chr5	HAVANA	gene	37106228	37249428	-	0.64544	1.56422	3.27372	2.7098	0.0148364	0.117563	-3.55834
ENSG00000085644.13	protein_coding	ZNF213	1	OTTHUMG00000177519.1	chr16	HAVANA	gene	3129777	3142805	+	0.611389	1.52773	3.58748	2.75032	0.0136291	0.111974	-3.55873
ENSG00000100575.13	protein_coding	TIMM9	1	OTTHUMG00000140322.7	chr14	HAVANA	gene	58408494	58427614	-	-0.420533	0.747148	5.37816	-2.92909	0.00934199	0.0878501	-3.55899
ENSG00000106635.7	protein_coding	BCL7B	2	OTTHUMG00000023412.4	chr7	HAVANA	gene	73536356	73558002	-	-0.449271	0.732413	5.24358	-2.91895	0.00954547	0.0890333	-3.56026
ENSG00000138172.10	protein_coding	CALHM2	2	OTTHUMG00000018990.1	chr10	HAVANA	gene	103446786	103452402	-	-0.584826	0.66673	4.24392	-2.85402	0.0109541	0.0968963	-3.56098
ENSG00000130045.15	protein_coding	NXNL2	2	OTTHUMG00000020170.5	chr9	HAVANA	gene	88535101	88584274	+	1.94307	3.84524	-0.810834	2.28168	0.0356197	0.202561	-3.56133
ENSG00000063660.8	protein_coding	GPC1	1	OTTHUMG00000133349.6	chr2	HAVANA	gene	240435671	240468078	+	0.449136	1.36522	7.54159	3.0116	0.00783586	0.0779662	-3.56272
ENSG00000173409.13	protein_coding	ARV1	1	OTTHUMG00000037837.6	chr1	HAVANA	gene	230978981	231000595	+	0.368384	1.29091	5.35648	2.9241	0.00944172	0.088453	-3.56299
ENSG00000168453.14	protein_coding	HR	2	OTTHUMG00000097089.4	chr8	HAVANA	gene	22114415	22133384	-	1.5659	2.96062	0.706342	2.3373	0.0318692	0.188571	-3.56347
ENSG00000143771.11	protein_coding	CNIH4	2	OTTHUMG00000037635.3	chr1	HAVANA	gene	224356850	224379459	+	-0.400764	0.757457	5.8805	-2.96154	0.00871885	0.0837876	-3.5641
ENSG00000279434.1	TEC	RP11-85K15.3	2	OTTHUMG00000170879.1	chr14	HAVANA	gene	35086035	35088059	+	2.23574	4.71003	-0.881627	2.28176	0.0356146	0.202561	-3.56569
ENSG00000180902.17	protein_coding	D2HGDH	1	OTTHUMG00000151474.14	chr2	HAVANA	gene	241734579	241768816	+	0.556234	1.47043	3.96927	2.79834	0.0123201	0.104514	-3.5657
ENSG00000212864.3	protein_coding	RNF208	2	OTTHUMG00000131782.2	chr9	HAVANA	gene	137220247	137221581	-	-1.03159	0.489171	0.671117	-2.4905	0.0233594	0.155766	-3.56662
ENSG00000176871.8	protein_coding	WSB2	1	OTTHUMG00000168885.5	chr12	HAVANA	gene	118032694	118062430	-	-0.472345	0.720792	5.51927	-2.94302	0.00906929	0.0862104	-3.56786
ENSG00000280278.1	TEC	RP11-463O9.8	2	OTTHUMG00000183871.1	chr16	HAVANA	gene	86555320	86557299	+	1.50719	2.84256	-0.853462	2.28678	0.0352599	0.20136	-3.56978
ENSG00000172296.12	protein_coding	SPTLC3	2	OTTHUMG00000031899.4	chr20	HAVANA	gene	13008979	13169103	+	1.23329	2.35103	-0.670279	2.36416	0.0301929	0.182903	-3.57105
ENSG00000065029.14	protein_coding	ZNF76	2	OTTHUMG00000014564.4	chr6	HAVANA	gene	35258909	35295985	+	0.577736	1.4925	4.01658	2.80318	0.0121952	0.103749	-3.57276
ENSG00000166896.7	protein_coding	ATP23	2	OTTHUMG00000170493.1	chr12	HAVANA	gene	57941541	57957269	+	0.376968	1.29861	6.47547	2.97935	0.00839406	0.0820416	-3.57485
ENSG00000165661.16	protein_coding	QSOX2	1	OTTHUMG00000020923.2	chr9	HAVANA	gene	136206333	136245841	-	-0.594175	0.662423	5.73189	-2.94711	0.00899088	0.0856411	-3.57624
ENSG00000188385.11	protein_coding	JAKMIP3	2	OTTHUMG00000150167.3	chr10	HAVANA	gene	132104671	132184809	+	0.996431	1.99506	1.57514	2.55413	0.020498	0.143572	-3.57822
ENSG00000272666.1	lincRNA	CTA-384D8.35	2	OTTHUMG00000186141.1	chr22	HAVANA	gene	50542305	50542906	-	1.87518	3.66846	-0.546552	2.26965	0.0364838	0.205147	-3.57927
ENSG00000165861.13	protein_coding	ZFYVE1	2	OTTHUMG00000171365.2	chr14	HAVANA	gene	72969451	73027212	-	0.742968	1.67362	2.67445	2.65331	0.0166922	0.126872	-3.57949
ENSG00000119689.14	protein_coding	DLST	2	OTTHUMG00000171483.2	chr14	HAVANA	gene	74881891	74903745	+	-0.38468	0.765949	6.47788	-2.97029	0.0085577	0.0829074	-3.58345
ENSG00000196295.11	processed_transcript	AC005154.6	2	OTTHUMG00000152788.10	chr7	HAVANA	gene	30516309	30594809	-	0.54054	1.45452	3.49371	2.74185	0.0138732	0.112995	-3.58464
ENSG00000213096.10	protein_coding	ZNF254	2	OTTHUMG00000183394.1	chr19	HAVANA	gene	24033405	24129961	+	0.881415	1.84218	2.12463	2.58018	0.0194255	0.139401	-3.58607
ENSG00000115241.10	protein_coding	PPM1G	2	OTTHUMG00000097788.2	chr2	HAVANA	gene	27381194	27409687	-	-0.312756	0.805102	7.83353	-3.01222	0.00782546	0.0779148	-3.58874
ENSG00000259172.1	antisense	RP11-299G20.2	2	OTTHUMG00000172092.1	chr15	HAVANA	gene	101295419	101305737	+	2.27479	4.83929	-0.94941	2.26689	0.0366844	0.205904	-3.58924
ENSG00000169122.11	protein_coding	FAM110B	2	OTTHUMG00000164282.2	chr8	HAVANA	gene	57994509	58204279	+	0.87441	1.83326	1.21803	2.47976	0.0238782	0.157801	-3.59008
ENSG00000204228.3	protein_coding	HSD17B8	2	OTTHUMG00000031117.2	chr6	HAVANA	gene	33204642	33206831	+	1.09193	2.13159	1.35267	2.44543	0.0256103	0.164394	-3.59212
ENSG00000237181.1	antisense	AC147651.4	1	OTTHUMG00000151414.1	chr7	HAVANA	gene	603185	608482	+	-0.927089	0.525918	0.311736	-2.42765	0.026553	0.168086	-3.5948
ENSG00000198768.10	protein_coding	APCDD1L	2	OTTHUMG00000032845.4	chr20	HAVANA	gene	58459101	58515131	-	-0.592602	0.663146	2.85091	-2.72057	0.0145059	0.116043	-3.59559
ENSG00000175040.5	protein_coding	CHST2	2	OTTHUMG00000159351.2	chr3	HAVANA	gene	143119331	143124014	+	-0.676086	0.625861	2.25499	-2.62712	0.0176257	0.130962	-3.5969
ENSG00000058866.14	protein_coding	DGKG	2	OTTHUMG00000156617.5	chr3	HAVANA	gene	186105668	186362237	-	-0.653356	0.635799	2.8078	-2.69072	0.01544	0.120805	-3.59848
ENSG00000213463.4	protein_coding	SYNJ2BP	2	OTTHUMG00000171240.2	chr14	HAVANA	gene	70366496	70417061	-	0.53996	1.45393	4.66091	2.8365	0.0113673	0.0991395	-3.60247
ENSG00000104872.10	protein_coding	PIH1D1	2	OTTHUMG00000183167.3	chr19	HAVANA	gene	49446298	49453497	-	-0.408526	0.753393	5.61456	-2.9286	0.00935175	0.0878864	-3.60355
ENSG00000083799.17	protein_coding	CYLD	1	OTTHUMG00000173404.5	chr16	HAVANA	gene	50742050	50801935	+	0.550195	1.46428	4.38349	2.82021	0.011765	0.101539	-3.605
ENSG00000170113.15	protein_coding	NIPA1	2	OTTHUMG00000129099.4	chr15	HAVANA	gene	22773063	22829791	+	-0.418162	0.748377	5.31591	-2.90915	0.00974616	0.0903398	-3.60514
ENSG00000253368.3	protein_coding	TRNP1	2	OTTHUMG00000004277.4	chr1	HAVANA	gene	26993707	27000898	+	0.537285	1.45124	3.90062	2.73934	0.0139464	0.113281	-3.60961
ENSG00000272138.1	lincRNA	RP11-27N21.3	2	OTTHUMG00000185488.1	chr8	HAVANA	gene	79768142	79802842	+	1.53326	2.89438	0.11304	2.3007	0.0342934	0.197911	-3.61038
ENSG00000232859.9	protein_coding	LYRM9	1	OTTHUMG00000132829.10	chr17	HAVANA	gene	27878314	27894752	-	1.36755	2.58033	1.5231	2.46847	0.0244351	0.160372	-3.61192
ENSG00000186205.12	protein_coding	2018-03-01	2	OTTHUMG00000037353.4	chr1	HAVANA	gene	220786759	220819657	+	0.650838	1.57008	2.89861	2.62859	0.0175719	0.130778	-3.6134
ENSG00000184357.4	protein_coding	HIST1H1B	2	OTTHUMG00000016139.2	chr6	HAVANA	gene	27866849	27867529	-	-1.30201	0.40556	-0.602166	-2.35827	0.0305531	0.184146	-3.61536
ENSG00000213793.5	protein_coding	ZNF888	2	OTTHUMG00000182819.4	chr19	HAVANA	gene	52904417	52923481	-	0.950862	1.93303	1.32091	2.44964	0.0253916	0.163597	-3.6168
ENSG00000179630.10	protein_coding	LACC1	2	OTTHUMG00000016826.4	chr13	HAVANA	gene	43879284	43893932	+	2.13394	4.38914	-0.203493	2.26964	0.036484	0.205147	-3.6176
ENSG00000248367.1	antisense	CTB-129O4.1	1	OTTHUMG00000163311.1	chr5	HAVANA	gene	180293245	180295253	+	1.20534	2.30592	0.779521	2.39142	0.0285765	0.176369	-3.61832
ENSG00000141985.9	protein_coding	SH3GL1	1	OTTHUMG00000181918.3	chr19	HAVANA	gene	4360370	4400547	-	-0.341056	0.789463	6.38978	-2.95635	0.00881575	0.0844465	-3.61937
ENSG00000010704.18	protein_coding	HFE	1	OTTHUMG00000016348.3	chr6	HAVANA	gene	26087281	26098343	+	0.50539	1.41951	4.17152	2.78098	0.0127787	0.106969	-3.6206
ENSG00000285366.1	TEC	CTC-483L24.2	2	OTTHUMG00000192463.1	chr5	HAVANA	gene	142946569	142947105	-	-1.47299	0.360234	-1.52405	-2.29359	0.0347837	0.199759	-3.62093
ENSG00000131435.12	protein_coding	PDLIM4	1	OTTHUMG00000059645.7	chr5	HAVANA	gene	132257671	132273454	+	-0.416316	0.749336	7.48817	-2.98921	0.00821941	0.0808115	-3.62166
ENSG00000117036.11	protein_coding	ETV3	2	OTTHUMG00000034298.2	chr1	HAVANA	gene	157121191	157138474	-	-0.499052	0.707572	3.63949	-2.75391	0.0135266	0.111349	-3.62235
ENSG00000137561.4	protein_coding	TTPA	2	OTTHUMG00000164367.2	chr8	HAVANA	gene	63048553	63086053	-	-1.22075	0.429058	0.381736	-2.37975	0.0292582	0.179241	-3.62321
ENSG00000079150.17	protein_coding	FKBP7	2	OTTHUMG00000132577.6	chr2	HAVANA	gene	178463664	178478600	-	0.554714	1.46888	3.7584	2.7475	0.0137097	0.112055	-3.62606
ENSG00000185305.10	protein_coding	ARL15	2	OTTHUMG00000162287.4	chr5	HAVANA	gene	53883945	54310582	-	1.01305	2.01817	2.02192	2.56676	0.0199711	0.141525	-3.62637
ENSG00000181904.8	protein_coding	C5orf24	1	OTTHUMG00000129121.4	chr5	HAVANA	gene	134845680	134859737	+	0.396837	1.31662	5.26978	2.88453	0.0102687	0.0929299	-3.62685
ENSG00000157379.13	protein_coding	DHRS1	2	OTTHUMG00000029333.4	chr14	HAVANA	gene	24290598	24299833	-	0.524592	1.43853	4.8647	2.8442	0.0111839	0.0981142	-3.62825
ENSG00000161036.12	protein_coding	LRWD1	2	OTTHUMG00000157718.16	chr7	HAVANA	gene	102464929	102473168	+	-0.729508	0.60311	4.34792	-2.81393	0.0119218	0.102299	-3.62856
ENSG00000141404.15	protein_coding	GNAL	1	OTTHUMG00000131660.4	chr18	HAVANA	gene	11688956	11885685	+	1.029	2.04062	1.84382	2.52554	0.0217399	0.148844	-3.62913
ENSG00000171903.16	protein_coding	CYP4F11	2	OTTHUMG00000182294.5	chr19	HAVANA	gene	15912367	15934867	-	1.86442	3.64122	0.290752	2.2364	0.0389717	0.212618	-3.63039
ENSG00000135862.5	protein_coding	LAMC1	1	OTTHUMG00000035418.5	chr1	HAVANA	gene	183023460	183145592	+	-0.309823	0.80674	6.48205	-2.95591	0.008824	0.0844713	-3.63052
ENSG00000173210.19	protein_coding	ABLIM3	2	OTTHUMG00000129932.3	chr5	HAVANA	gene	149141483	149260542	+	-0.422706	0.746024	4.5365	-2.83716	0.0113513	0.0990583	-3.63136
ENSG00000253958.1	protein_coding	CLDN23	2	OTTHUMG00000163674.1	chr8	HAVANA	gene	8701938	8704106	+	-0.840263	0.558542	1.61432	-2.50424	0.0227109	0.153251	-3.63206
ENSG00000142039.3	protein_coding	CCDC97	1	OTTHUMG00000182722.5	chr19	HAVANA	gene	41310189	41324883	+	0.45581	1.37155	5.62333	2.88786	0.0101965	0.0926131	-3.6344
ENSG00000166689.15	protein_coding	PLEKHA7	1	OTTHUMG00000165954.4	chr11	HAVANA	gene	16777317	17014443	-	-0.79713	0.575493	2.05383	-2.5741	0.0196706	0.140346	-3.63472
ENSG00000197555.9	protein_coding	SIPA1L1	1	OTTHUMG00000171282.6	chr14	HAVANA	gene	71320449	71741229	+	-0.436098	0.739131	5.33061	-2.88998	0.0101508	0.0924241	-3.63596
ENSG00000133773.11	protein_coding	CCDC59	2	OTTHUMG00000170251.2	chr12	HAVANA	gene	82223681	82358805	-	-0.31371	0.80457	7.37265	-2.97443	0.00848268	0.0825289	-3.63717
ENSG00000158423.16	protein_coding	RIBC1	2	OTTHUMG00000021615.4	chrX	HAVANA	gene	53422690	53431120	+	2.29696	4.9142	-0.806235	2.22757	0.039659	0.214882	-3.64028
ENSG00000197153.4	protein_coding	HIST1H3J	1	OTTHUMG00000016185.3	chr6	HAVANA	gene	27890382	27893106	-	-1.30136	0.405745	-0.562251	-2.3607	0.0304041	0.183471	-3.64068
ENSG00000164117.13	protein_coding	FBXO8	2	OTTHUMG00000160746.4	chr4	HAVANA	gene	174236658	174284264	-	0.552651	1.46678	3.45318	2.72036	0.0145122	0.116043	-3.64134
ENSG00000196159.11	protein_coding	FAT4	2	OTTHUMG00000133100.4	chr4	HAVANA	gene	125316399	125492932	+	1.23557	2.35475	1.24482	2.41963	0.0269888	0.169733	-3.64307
ENSG00000183298.5	processed_pseudogene	RP11-556K13.1	2	OTTHUMG00000010943.1	chr1	HAVANA	gene	101786340	101787219	-	-1.03047	0.489551	0.67939	-2.37888	0.0293093	0.179477	-3.64565
ENSG00000132740.8	protein_coding	IGHMBP2	1	OTTHUMG00000167894.2	chr11	HAVANA	gene	68903842	68940602	+	-0.479535	0.717209	4.53122	-2.81652	0.0118569	0.101978	-3.64572
ENSG00000090273.13	protein_coding	NUDC	1	OTTHUMG00000004226.11	chr1	HAVANA	gene	26900238	26946862	+	-0.334883	0.792849	8.0458	-2.98453	0.0083019	0.0812474	-3.6468
ENSG00000164045.11	protein_coding	CDC25A	2	OTTHUMG00000133535.5	chr3	HAVANA	gene	48157146	48188402	-	-0.518097	0.698292	2.95598	-2.67247	0.0160389	0.123696	-3.64803
ENSG00000164509.13	protein_coding	IL31RA	1	OTTHUMG00000097045.5	chr5	HAVANA	gene	55851379	55922853	+	-0.536277	0.689548	3.21138	-2.70756	0.0149062	0.117991	-3.65108
ENSG00000232368.1	processed_pseudogene	FTLL2	1	OTTHUMG00000021327.2	chrX	HAVANA	gene	30630298	30630825	+	1.09683	2.13885	1.62771	2.47411	0.0241555	0.159238	-3.65115
ENSG00000237732.9	transcribed_unprocessed_pseudogene	AC010980.2	1	OTTHUMG00000153406.3	chr2	HAVANA	gene	222318275	222352989	+	1.71315	3.27877	-1.14377	2.26194	0.0370471	0.207355	-3.65172
ENSG00000105245.9	protein_coding	NUMBL	1	OTTHUMG00000182627.5	chr19	HAVANA	gene	40665905	40690972	-	0.435138	1.35204	5.72102	2.89932	0.00995181	0.0915063	-3.65236
ENSG00000119599.16	protein_coding	DCAF4	1	OTTHUMG00000160542.3	chr14	HAVANA	gene	72926332	72959703	+	0.603073	1.51895	3.37669	2.67028	0.0161123	0.123854	-3.65379
ENSG00000166225.8	protein_coding	FRS2	1	OTTHUMG00000169373.3	chr12	HAVANA	gene	69470349	69579789	+	-1.02281	0.492158	0.279903	-2.37995	0.0292465	0.179241	-3.65421
ENSG00000170458.13	protein_coding	CD14	1	OTTHUMG00000129507.4	chr5	HAVANA	gene	140631728	140633701	-	-1.75835	0.295587	-0.951811	-2.24108	0.0386123	0.211747	-3.6543
ENSG00000234362.5	lincRNA	AC104654.2	2	OTTHUMG00000152505.2	chr2	HAVANA	gene	41931599	41933723	-	1.50764	2.84345	-0.453996	2.24389	0.038398	0.211432	-3.65651
ENSG00000099821.13	protein_coding	POLRMT	2	OTTHUMG00000180611.11	chr19	HAVANA	gene	617224	633604	-	-0.510197	0.702126	5.45367	-2.88056	0.0103556	0.0934325	-3.6575
ENSG00000254604.1	antisense	AP000487.6	2	OTTHUMG00000167273.1	chr11	HAVANA	gene	70282367	70363368	-	-1.26033	0.417447	-0.214755	-2.3427	0.0315251	0.187499	-3.6587
ENSG00000096060.14	protein_coding	FKBP5	2	OTTHUMG00000014576.2	chr6	HAVANA	gene	35573585	35728583	-	0.49973	1.41395	5.50623	2.88895	0.0101731	0.0925138	-3.66008
ENSG00000138759.18	protein_coding	FRAS1	1	OTTHUMG00000160856.4	chr4	HAVANA	gene	78057570	78544269	+	0.841696	1.79216	2.36077	2.57112	0.0197923	0.140746	-3.66468
ENSG00000145014.17	protein_coding	TMEM44	1	OTTHUMG00000156023.3	chr3	HAVANA	gene	194587673	194633689	-	-0.482381	0.715795	3.85874	-2.73708	0.0140127	0.113634	-3.66718
ENSG00000122877.15	protein_coding	EGR2	2	OTTHUMG00000018308.6	chr10	HAVANA	gene	62811996	62919900	-	0.783343	1.72111	2.15561	2.6018	0.0185757	0.135988	-3.66755
ENSG00000117616.17	protein_coding	RSRP1	2	OTTHUMG00000043611.6	chr1	HAVANA	gene	25242237	25338213	-	0.456573	1.37228	4.9609	2.84441	0.0111788	0.0981142	-3.66822
ENSG00000026025.15	protein_coding	VIM	2	OTTHUMG00000017744.5	chr10	HAVANA	gene	17228259	17237593	+	-0.319228	0.801498	11.8085	-3.03078	0.00752109	0.0757957	-3.66854
ENSG00000070814.18	protein_coding	TCOF1	1	OTTHUMG00000130081.15	chr5	HAVANA	gene	150357639	150400308	+	-0.369083	0.774274	7.51113	-2.96197	0.00871076	0.0837876	-3.66859
ENSG00000196712.17	protein_coding	NF1	2	OTTHUMG00000132871.9	chr17	HAVANA	gene	31094927	31382116	+	-0.455775	0.729119	3.59973	-2.75369	0.0135329	0.111349	-3.66911
ENSG00000116132.11	protein_coding	PRRX1	1	OTTHUMG00000035231.6	chr1	HAVANA	gene	170662728	170739419	+	-0.727037	0.604144	3.99585	-2.77301	0.0129945	0.108022	-3.67363
ENSG00000260300.5	protein_coding	RP11-505K9.4	2	OTTHUMG00000176811.3	chr16	HAVANA	gene	83908132	83951445	+	2.03867	4.10866	-1.1517	2.1932	0.0424397	0.224075	-3.6748
ENSG00000125378.15	protein_coding	BMP4	1	OTTHUMG00000140303.4	chr14	HAVANA	gene	53949736	53958761	-	-0.769197	0.586744	2.13292	-2.53972	0.0211151	0.145996	-3.67482
ENSG00000225783.7	lincRNA	MIAT	1	OTTHUMG00000150985.5	chr22	HAVANA	gene	26646428	26676475	+	1.94646	3.85427	-1.06783	2.22011	0.0402478	0.216646	-3.67517
ENSG00000272384.1	lincRNA	RP11-44N11.2	2	OTTHUMG00000185333.1	chr8	HAVANA	gene	122779971	122780830	-	1.20797	2.31013	-0.241857	2.30064	0.0342976	0.197911	-3.67639
ENSG00000149089.12	protein_coding	APIP	2	OTTHUMG00000166455.2	chr11	HAVANA	gene	34853094	34916499	-	-0.360794	0.778736	5.71267	-2.89769	0.00998617	0.0916775	-3.67799
ENSG00000213347.10	protein_coding	MXD3	2	OTTHUMG00000130854.3	chr5	HAVANA	gene	177301461	177312757	-	0.550433	1.46453	3.80506	2.76493	0.0132172	0.109445	-3.67893
ENSG00000182648.11	lincRNA	C7orf13	2	OTTHUMG00000157237.1	chr7	HAVANA	gene	156472196	156640654	-	-0.568061	0.674523	3.83017	-2.75379	0.0135302	0.111349	-3.68133
ENSG00000125868.15	protein_coding	DSTN	2	OTTHUMG00000031947.9	chr20	HAVANA	gene	17569863	17609919	+	0.406268	1.32525	8.57873	2.97484	0.00847527	0.0825107	-3.6836
ENSG00000163536.12	protein_coding	SERPINI1	2	OTTHUMG00000158450.11	chr3	HAVANA	gene	167735243	167825568	+	0.889896	1.85304	2.17261	2.53123	0.0214874	0.147726	-3.68364
ENSG00000078699.21	protein_coding	CBFA2T2	2	OTTHUMG00000032261.6	chr20	HAVANA	gene	33490075	33650036	+	0.389186	1.30965	5.1897	2.85503	0.0109306	0.0968289	-3.68523
ENSG00000196275.13	protein_coding	GTF2IRD2	2	OTTHUMG00000181527.3	chr7	HAVANA	gene	74796144	74851551	-	0.686945	1.60987	1.9279	2.50821	0.0225272	0.15283	-3.68605
ENSG00000129515.18	protein_coding	SNX6	1	OTTHUMG00000140213.5	chr14	HAVANA	gene	34561094	34630183	-	0.3363	1.26251	7.02421	2.93897	0.00914788	0.0865709	-3.68654
ENSG00000015133.18	protein_coding	CCDC88C	1	OTTHUMG00000171099.1	chr14	HAVANA	gene	91271323	91417844	-	-0.587957	0.665284	3.08071	-2.65424	0.0166597	0.126755	-3.68901
ENSG00000151692.14	protein_coding	RNF144A	2	OTTHUMG00000090353.7	chr2	HAVANA	gene	6917392	7068286	+	-0.52078	0.696995	3.60915	-2.76336	0.0132609	0.109564	-3.69104
ENSG00000151665.12	protein_coding	PIGF	2	OTTHUMG00000128816.5	chr2	HAVANA	gene	46580937	46617119	-	-1.18912	0.438572	1.13928	-2.45734	0.0249962	0.162481	-3.69187
ENSG00000175073.7	protein_coding	VCPIP1	2	OTTHUMG00000164560.1	chr8	HAVANA	gene	66628487	66667217	-	1.14306	2.20849	0.794746	2.35848	0.0305407	0.184146	-3.6962
ENSG00000104885.17	protein_coding	DOT1L	1	OTTHUMG00000150431.6	chr19	HAVANA	gene	2164149	2232578	+	-0.610607	0.654921	3.63523	-2.73123	0.0141855	0.114537	-3.69625
ENSG00000157933.9	protein_coding	SKI	2	OTTHUMG00000001407.3	chr1	HAVANA	gene	2228695	2310119	+	-0.549831	0.6831	4.19991	-2.77609	0.0129107	0.107576	-3.69629
ENSG00000111206.12	protein_coding	FOXM1	2	OTTHUMG00000168118.2	chr12	HAVANA	gene	2857681	2877155	-	-0.891383	0.539097	1.49986	-2.44031	0.0258781	0.165471	-3.69766
ENSG00000106560.10	protein_coding	GIMAP2	2	OTTHUMG00000157488.1	chr7	HAVANA	gene	150685697	150693641	+	1.16661	2.24484	1.98799	2.45742	0.0249919	0.162481	-3.70033
ENSG00000128268.11	protein_coding	MGAT3	1	OTTHUMG00000030185.5	chr22	HAVANA	gene	39457344	39492194	+	0.587858	1.50301	3.29294	2.68553	0.015608	0.121481	-3.70097
ENSG00000183844.16	protein_coding	FAM3B	2	OTTHUMG00000086752.2	chr21	HAVANA	gene	41304212	41357431	+	-1.5445	0.342814	-1.506	-2.18823	0.0428568	0.22522	-3.70116
ENSG00000129055.12	protein_coding	ANAPC13	2	OTTHUMG00000159803.1	chr3	HAVANA	gene	134477706	134486716	-	-0.512335	0.701087	5.83555	-2.8943	0.0100582	0.0919743	-3.70225
ENSG00000237505.7	antisense	RP11-76N22.2	2	OTTHUMG00000010024.4	chr1	HAVANA	gene	87620803	88685204	-	1.11621	2.16777	0.532593	2.32139	0.0329026	0.192657	-3.70428
[truncated: 12,906 more rows]

## Sheet: Lest vs Ctrl
gene_id	gene_type	gene_name	level	havana_gene	chr	DB	Type	start	end	strand	logFC	AveExpr	t	P.Value	adj.P.Val	B
ENSG00000135480.15	protein_coding	KRT7	1	OTTHUMG00000169580.1	chr12	HAVANA	gene	52232520	52252186	+	1.3379	8.634	13.1312	2.39847e-10	3.57492e-06	14.0526
ENSG00000142871.16	protein_coding	CYR61	2	OTTHUMG00000010577.1	chr1	HAVANA	gene	85580761	85583962	+	1.43241	7.5825	11.9808	9.90989e-10	3.61586e-06	12.652
ENSG00000169429.10	protein_coding	CXCL8	2	OTTHUMG00000151316.1	chr4	HAVANA	gene	73740506	73743716	+	-4.20021	2.59504	-11.8238	1.21297e-09	3.61586e-06	12.3157
ENSG00000023171.17	protein_coding	GRAMD1B	2	OTTHUMG00000166004.6	chr11	HAVANA	gene	123358428	123627774	+	3.28525	1.3331	12.2253	7.2643e-10	3.61586e-06	12.258
ENSG00000078401.6	protein_coding	EDN1	2	OTTHUMG00000014266.1	chr6	HAVANA	gene	12290363	12297194	+	2.91394	2.26046	12.1622	7.86667e-10	3.61586e-06	12.0943
ENSG00000124875.9	protein_coding	CXCL6	1	OTTHUMG00000130010.3	chr4	HAVANA	gene	73836497	73849064	+	-1.23885	8.17796	-11.4598	1.95375e-09	4.85344e-06	11.9762
ENSG00000118523.5	protein_coding	CTGF	2	OTTHUMG00000015573.2	chr6	HAVANA	gene	131948176	131951373	-	1.79168	4.22331	11.1149	3.10384e-09	6.60897e-06	11.4985
ENSG00000129474.15	protein_coding	AJUBA	1	OTTHUMG00000028711.5	chr14	HAVANA	gene	22971174	22982642	-	1.21758	6.70852	10.2936	9.78516e-09	1.8231e-05	10.3969
ENSG00000176697.18	protein_coding	BDNF	2	OTTHUMG00000178797.2	chr11	HAVANA	gene	27654893	27722058	-	2.00056	3.75885	10.19	1.1365e-08	1.88216e-05	10.1016
ENSG00000141753.6	protein_coding	IGFBP4	2	OTTHUMG00000133326.1	chr17	HAVANA	gene	40443461	40457731	+	1.88553	3.23045	9.77485	2.09382e-08	2.83713e-05	9.58997
ENSG00000095752.6	protein_coding	IL11	2	OTTHUMG00000180789.2	chr19	HAVANA	gene	55364389	55370463	-	1.84967	1.62844	9.7762	2.08961e-08	2.83713e-05	9.48886
ENSG00000162645.12	protein_coding	GBP2	2	OTTHUMG00000010662.4	chr1	HAVANA	gene	89106132	89150456	-	-1.3552	4.98071	-9.29367	4.3531e-08	4.991e-05	8.92798
ENSG00000112096.17	protein_coding	SOD2	1	OTTHUMG00000015940.4	chr6	HAVANA	gene	159669057	159745186	-	-1.23638	6.63977	-9.2194	4.88517e-08	5.20097e-05	8.80253
ENSG00000114019.14	protein_coding	AMOTL2	1	OTTHUMG00000159777.7	chr3	HAVANA	gene	134355874	134375479	-	1.64726	5.42966	9.10273	5.86278e-08	5.82565e-05	8.64028
ENSG00000188042.7	protein_coding	ARL4C	2	OTTHUMG00000133291.2	chr2	HAVANA	gene	234493041	234497053	-	-1.2198	4.09006	-9.04281	6.44265e-08	6.00173e-05	8.54677
ENSG00000100889.11	protein_coding	PCK2	1	OTTHUMG00000028791.9	chr14	HAVANA	gene	24094053	24110598	+	1.36994	5.23	8.98542	7.05446e-08	6.18511e-05	8.46075
ENSG00000138772.12	protein_coding	ANXA3	1	OTTHUMG00000130198.9	chr4	HAVANA	gene	78551519	78610451	+	2.29864	4.87909	8.93888	7.59525e-08	6.21466e-05	8.26546
ENSG00000135069.13	protein_coding	PSAT1	2	OTTHUMG00000020066.1	chr9	HAVANA	gene	78297143	78330093	+	0.96654	8.19225	8.90197	8.05496e-08	6.21466e-05	8.25797
ENSG00000127528.5	protein_coding	KLF2	2	OTTHUMG00000182330.1	chr19	HAVANA	gene	16324817	16327874	+	2.10754	4.50965	8.88024	8.33903e-08	6.21466e-05	8.20179
ENSG00000171631.14	protein_coding	P2RY6	2	OTTHUMG00000167969.3	chr11	HAVANA	gene	73264505	73298617	+	-1.57091	3.73048	-8.80717	9.37412e-08	6.35097e-05	8.18332
ENSG00000164400.5	protein_coding	CSF2	2	OTTHUMG00000059637.3	chr5	HAVANA	gene	132073790	132076170	+	-1.60633	4.73225	-8.84839	8.77473e-08	6.22797e-05	8.16224
ENSG00000186960.10	lincRNA	C14orf23	2	OTTHUMG00000029410.6	chr14	HAVANA	gene	28772704	28813453	+	-1.40767	3.53824	-8.41866	1.76536e-07	0.000114403	7.56038
ENSG00000188707.5	protein_coding	ZBED6CL	2	OTTHUMG00000158328.1	chr7	HAVANA	gene	150329789	150332721	+	-1.72418	5.45087	-8.29412	2.17105e-07	0.000124459	7.34497
ENSG00000108691.9	protein_coding	CCL2	2	OTTHUMG00000132887.3	chr17	HAVANA	gene	34255218	34257203	+	-1.28267	5.73127	-8.32498	2.0622e-07	0.000122949	7.3366
ENSG00000176046.8	protein_coding	NUPR1	1	OTTHUMG00000131764.3	chr16	HAVANA	gene	28532708	28539174	-	4.08793	3.09478	9.59668	2.73733e-08	3.39999e-05	7.27223
ENSG00000185338.5	protein_coding	SOCS1	2	OTTHUMG00000129792.2	chr16	HAVANA	gene	11254405	11256200	-	-2.60677	0.81348	-8.33538	2.02682e-07	0.000122949	7.26531
ENSG00000041982.15	protein_coding	TNC	1	OTTHUMG00000021010.6	chr9	HAVANA	gene	115019578	115118257	-	-1.46485	5.28239	-8.23347	2.40288e-07	0.000132648	7.21575
ENSG00000184557.4	protein_coding	SOCS3	2	OTTHUMG00000177513.5	chr17	HAVANA	gene	78356778	78360077	-	-1.42246	3.12142	-8.12247	2.89663e-07	0.000143914	7.08112
ENSG00000092621.12	protein_coding	PHGDH	2	OTTHUMG00000012100.6	chr1	HAVANA	gene	119648411	119744226	+	1.18684	7.01666	8.15749	2.73034e-07	0.00014033	7.06265
ENSG00000167601.11	protein_coding	AXL	1	OTTHUMG00000182727.3	chr19	HAVANA	gene	41219203	41261766	+	1.29945	6.5449	8.05617	3.24114e-07	0.000155836	6.89698
ENSG00000165272.15	protein_coding	AQP3	2	OTTHUMG00000019769.4	chr9	HAVANA	gene	33441154	33447633	-	-1.69305	2.75004	-8.02093	3.44143e-07	0.000160296	6.88425
ENSG00000118515.11	protein_coding	SGK1	2	OTTHUMG00000015613.5	chr6	HAVANA	gene	134169246	134318112	-	1.38405	3.95975	7.87618	4.40992e-07	0.000193323	6.6689
ENSG00000130766.4	protein_coding	SESN2	2	OTTHUMG00000003532.1	chr1	HAVANA	gene	28259527	28282491	+	1.31948	4.70135	7.74816	5.5038e-07	0.000221714	6.45591
ENSG00000169715.14	protein_coding	MT1E	2	OTTHUMG00000133014.2	chr16	HAVANA	gene	56625475	56627112	+	1.03972	6.37836	7.79949	5.03468e-07	0.0002144	6.44881
ENSG00000123933.16	protein_coding	MXD4	2	OTTHUMG00000090243.5	chr4	HAVANA	gene	2247432	2262294	-	0.958766	6.63887	7.78325	5.17841e-07	0.0002144	6.44426
ENSG00000102010.14	protein_coding	BMX	2	OTTHUMG00000021180.1	chrX	HAVANA	gene	15464246	15556529	+	3.27206	-0.582353	8.163	2.70509e-07	0.00014033	6.38386
ENSG00000128965.11	protein_coding	CHAC1	2	OTTHUMG00000130208.8	chr15	HAVANA	gene	40952962	40956519	+	2.64798	3.80194	7.64239	6.62035e-07	0.000259675	6.25205
ENSG00000116016.13	protein_coding	EPAS1	1	OTTHUMG00000128818.24	chr2	HAVANA	gene	46293667	46386703	+	-1.8214	2.89281	-7.48607	8.72189e-07	0.000309523	6.01503
ENSG00000221869.4	protein_coding	CEBPD	2	OTTHUMG00000162290.2	chr8	HAVANA	gene	47736909	47739086	-	-1.18377	7.12204	-7.56936	7.52723e-07	0.000287675	6.00663
ENSG00000177706.8	protein_coding	FAM20C	1	OTTHUMG00000151401.4	chr7	HAVANA	gene	192969	260745	+	-0.923638	4.91171	-7.34591	1.11985e-06	0.000384457	5.6523
ENSG00000118503.14	protein_coding	TNFAIP3	2	OTTHUMG00000015664.2	chr6	HAVANA	gene	137867188	137883312	+	-0.827485	6.2323	-7.33845	1.13493e-06	0.000384457	5.64477
ENSG00000139269.2	protein_coding	INHBE	2	OTTHUMG00000169995.2	chr12	HAVANA	gene	57452323	57459280	+	2.41639	3.40361	7.27401	1.27436e-06	0.000422096	5.36884
ENSG00000206073.10	protein_coding	SERPINB4	2	OTTHUMG00000060405.4	chr18	HAVANA	gene	63637259	63644298	-	-2.90715	0.374841	-7.51235	8.32489e-07	0.00030264	5.25972
ENSG00000081041.8	protein_coding	CXCL2	2	OTTHUMG00000160865.2	chr4	HAVANA	gene	74097035	74099293	-	-1.00621	6.83297	-7.12369	1.67349e-06	0.000542247	5.2196
ENSG00000115008.5	protein_coding	IL1A	2	OTTHUMG00000131315.2	chr2	HAVANA	gene	112773915	112784590	-	-2.48836	2.26075	-6.99516	2.11768e-06	0.000657584	5.11243
ENSG00000042062.11	protein_coding	FAM65C	2	OTTHUMG00000032724.2	chr20	HAVANA	gene	50586108	50691528	-	-1.50172	4.13558	-6.97901	2.18158e-06	0.000663601	5.10753
ENSG00000163568.14	protein_coding	AIM2	2	OTTHUMG00000037183.4	chr1	HAVANA	gene	159062484	159147096	-	-2.24236	0.343703	-7.02172	2.01676e-06	0.000639569	4.89544
ENSG00000163435.15	protein_coding	ELF3	2	OTTHUMG00000035867.4	chr1	HAVANA	gene	202007945	202017188	+	-1.12821	6.13436	-6.85258	2.75679e-06	0.000821799	4.79695
ENSG00000100628.11	protein_coding	ASB2	1	OTTHUMG00000171298.2	chr14	HAVANA	gene	93934153	93976791	-	-3.66396	-2.36589	-7.89866	4.24257e-07	0.000191623	4.76597
ENSG00000099860.8	protein_coding	GADD45B	2	OTTHUMG00000180434.3	chr19	HAVANA	gene	2476122	2478259	+	1.38404	4.40728	6.78328	3.13704e-06	0.000916815	4.76427
ENSG00000184470.20	protein_coding	TXNRD2	2	OTTHUMG00000149975.7	chr22	HAVANA	gene	19875517	19941992	-	1.27325	3.91796	6.75015	3.33767e-06	0.000955164	4.71067
ENSG00000144583.4	protein_coding	2018-03-04	2	OTTHUMG00000154824.2	chr2	HAVANA	gene	216257865	216372027	-	1.29937	1.87339	6.74084	3.39642e-06	0.000955164	4.66917
ENSG00000104881.15	protein_coding	PPP1R13L	2	OTTHUMG00000181784.2	chr19	HAVANA	gene	45379634	45406349	-	1.62995	3.01468	6.69918	3.67279e-06	0.000977553	4.61291
ENSG00000167767.13	protein_coding	KRT80	2	OTTHUMG00000150193.1	chr12	HAVANA	gene	52168996	52192000	-	0.852263	4.54674	6.71303	3.57838e-06	0.00096974	4.54569
ENSG00000248890.1	antisense	RP11-291L15.2	2	OTTHUMG00000161429.1	chr4	HAVANA	gene	144642922	144661357	-	1.44169	2.00216	6.64719	4.0507e-06	0.00102833	4.52693
ENSG00000085117.11	protein_coding	CD82	1	OTTHUMG00000166472.2	chr11	HAVANA	gene	44564427	44620363	+	-0.829141	5.66737	-6.72788	3.47996e-06	0.000960533	4.48092
ENSG00000069399.14	protein_coding	BCL3	1	OTTHUMG00000151517.3	chr19	HAVANA	gene	44747705	44760044	+	-1.02952	5.91673	-6.64461	4.07055e-06	0.00102833	4.38695
ENSG00000101255.10	protein_coding	TRIB3	2	OTTHUMG00000031627.5	chr20	HAVANA	gene	362835	397559	+	1.03868	6.96466	6.67119	3.87149e-06	0.00101236	4.37423
ENSG00000183578.6	protein_coding	TNFAIP8L3	2	OTTHUMG00000172460.2	chr15	HAVANA	gene	51056598	51105276	-	-1.41586	2.63012	-6.51882	5.16721e-06	0.00126258	4.30318
ENSG00000164283.12	protein_coding	ESM1	2	OTTHUMG00000097010.5	chr5	HAVANA	gene	54977864	55022671	-	1.52089	0.361029	6.47075	5.66364e-06	0.00136156	4.19649
ENSG00000128272.14	protein_coding	ATF4	2	OTTHUMG00000151099.2	chr22	HAVANA	gene	39519695	39522685	+	0.85709	6.8159	6.54438	4.92189e-06	0.00122268	4.14786
ENSG00000106105.13	protein_coding	GARS	2	OTTHUMG00000152769.1	chr7	HAVANA	gene	30594681	30634033	+	0.625176	7.54931	6.46001	5.78117e-06	0.00136775	3.95022
ENSG00000082126.17	protein_coding	MPP4	1	OTTHUMG00000154525.7	chr2	HAVANA	gene	201644870	201698694	-	1.80206	-0.222717	6.35734	7.04096e-06	0.00161455	3.9049
ENSG00000248323.5	lincRNA	RP11-213H15.3	2	OTTHUMG00000162611.1	chr5	HAVANA	gene	91303029	91314402	-	-1.294	3.41469	-6.30302	7.81957e-06	0.00172102	3.87881
ENSG00000142910.15	protein_coding	TINAGL1	2	OTTHUMG00000003884.1	chr1	HAVANA	gene	31576485	31587686	+	0.917281	5.90774	6.40044	6.4806e-06	0.00150927	3.85805
ENSG00000123610.4	protein_coding	TNFAIP6	2	OTTHUMG00000131884.3	chr2	HAVANA	gene	151357592	151380048	+	-1.0249	4.25182	-6.259	8.51563e-06	0.00181322	3.76171
ENSG00000013588.7	protein_coding	GPRC5A	2	OTTHUMG00000168710.2	chr12	HAVANA	gene	12890782	12917937	+	0.788456	5.32842	6.30063	7.85584e-06	0.00172102	3.73496
ENSG00000140279.12	protein_coding	DUOX2	2	OTTHUMG00000131355.3	chr15	HAVANA	gene	45092650	45114344	-	-2.81687	1.10232	-6.3032	7.81684e-06	0.00172102	3.66134
ENSG00000136842.13	protein_coding	TMOD1	1	OTTHUMG00000020325.2	chr9	HAVANA	gene	97501180	97601748	+	-1.86296	2.46853	-6.18917	9.7546e-06	0.00196476	3.63549
ENSG00000273132.1	antisense	RP11-350J20.12	2	OTTHUMG00000186262.1	chr6	HAVANA	gene	149852462	149853192	+	1.48688	1.94601	6.1471	1.05896e-05	0.00207681	3.61798
ENSG00000249992.1	protein_coding	TMEM158	2	OTTHUMG00000160317.2	chr3	HAVANA	gene	45224466	45226278	-	-0.742993	7.15437	-6.29336	7.96716e-06	0.00172102	3.6033
ENSG00000069974.15	protein_coding	RAB27A	2	OTTHUMG00000131959.3	chr15	HAVANA	gene	55202966	55319113	-	-0.804877	5.40764	-6.22499	9.09739e-06	0.00187486	3.57644
ENSG00000151789.10	protein_coding	ZNF385D	1	OTTHUMG00000130484.9	chr3	HAVANA	gene	21412222	22373321	-	-1.37317	1.62423	-6.13448	1.08543e-05	0.00210108	3.5745
ENSG00000109099.14	protein_coding	PMP22	1	OTTHUMG00000058960.6	chr17	HAVANA	gene	15229777	15265357	-	-0.868175	5.93422	-6.22284	9.13543e-06	0.00187486	3.56352
ENSG00000171055.14	protein_coding	FEZ2	2	OTTHUMG00000152148.4	chr2	HAVANA	gene	36531805	36646087	-	0.786481	5.93453	6.2202	9.18247e-06	0.00187486	3.53291
ENSG00000138316.10	protein_coding	ADAMTS14	2	OTTHUMG00000018414.1	chr10	HAVANA	gene	70672803	70762441	+	-2.42049	-0.0192897	-6.17371	1.00533e-05	0.00199792	3.5008
ENSG00000148057.15	protein_coding	IDNK	1	OTTHUMG00000020105.6	chr9	HAVANA	gene	83623049	83644130	+	1.35955	3.18432	6.06716	1.23867e-05	0.00230781	3.46994
ENSG00000168389.17	protein_coding	MFSD2A	2	OTTHUMG00000009293.2	chr1	HAVANA	gene	39955112	39969968	+	-0.97611	3.07303	-6.07793	1.21272e-05	0.00228805	3.39082
ENSG00000147394.18	protein_coding	ZNF185	1	OTTHUMG00000024187.12	chrX	HAVANA	gene	152914442	152973480	+	1.32778	2.11918	6.02609	1.34299e-05	0.00238819	3.38626
ENSG00000137869.14	protein_coding	CYP19A1	1	OTTHUMG00000131747.6	chr15	HAVANA	gene	51208057	51338610	-	-1.79079	1.19296	-6.04539	1.29289e-05	0.00237907	3.37297
ENSG00000205403.13	protein_coding	CFI	2	OTTHUMG00000161109.6	chr4	HAVANA	gene	109740694	109802179	-	-1.0951	3.60413	-6.02608	1.343e-05	0.00238819	3.36533
ENSG00000130558.19	protein_coding	OLFM1	1	OTTHUMG00000020897.4	chr9	HAVANA	gene	135075422	135121179	+	-1.36994	4.17851	-6.01898	1.36193e-05	0.00238819	3.34015
ENSG00000164761.8	protein_coding	TNFRSF11B	2	OTTHUMG00000164969.1	chr8	HAVANA	gene	118923557	118952200	-	-1.63005	4.65671	-6.02489	1.34615e-05	0.00238819	3.29767
ENSG00000104368.17	protein_coding	PLAT	1	OTTHUMG00000164072.2	chr8	HAVANA	gene	42175233	42207724	-	-0.808776	4.06588	-6.09694	1.16829e-05	0.00223249	3.27329
ENSG00000231574.5	lincRNA	RP11-91K9.1	2	OTTHUMG00000157236.1	chr3	HAVANA	gene	177816865	177899224	+	-4.9735	-2.52926	-7.52499	8.14083e-07	0.00030264	3.26051
ENSG00000166165.12	protein_coding	CKB	2	OTTHUMG00000171786.2	chr14	HAVANA	gene	103519659	103523111	-	-1.06659	5.03893	-6.01201	1.38081e-05	0.00239314	3.22394
ENSG00000064042.17	protein_coding	LIMCH1	1	OTTHUMG00000160575.7	chr4	HAVANA	gene	41359607	41700044	+	1.44129	4.44899	5.94979	1.56159e-05	0.00261523	3.20899
ENSG00000149150.8	protein_coding	SLC43A1	1	OTTHUMG00000167030.3	chr11	HAVANA	gene	57484534	57515786	-	0.787968	4.95298	5.96895	1.50346e-05	0.00254649	3.12956
ENSG00000121858.10	protein_coding	TNFSF10	1	OTTHUMG00000156917.2	chr3	HAVANA	gene	172505508	172523507	-	-2.01812	1.65958	-5.99153	1.43779e-05	0.00246324	3.12221
ENSG00000228742.9	lincRNA	RP5-884M6.1	2	OTTHUMG00000157590.3	chr7	HAVANA	gene	106775011	106795564	+	-1.02969	4.33103	-5.92282	1.64741e-05	0.0027283	3.10977
ENSG00000141469.17	protein_coding	SLC14A1	1	OTTHUMG00000132617.15	chr18	HAVANA	gene	45687025	45752520	+	-1.80487	1.27343	-5.8559	1.882e-05	0.00304905	3.05675
ENSG00000163347.5	protein_coding	CLDN1	2	OTTHUMG00000156214.2	chr3	HAVANA	gene	190305701	190322475	-	1.21755	2.565	5.84486	1.92392e-05	0.00305064	2.99314
ENSG00000171451.13	protein_coding	DSEL	2	OTTHUMG00000132804.2	chr18	HAVANA	gene	67506582	67516980	-	-0.94711	3.9386	-5.845	1.92335e-05	0.00305064	2.99108
ENSG00000112299.7	protein_coding	VNN1	2	OTTHUMG00000015587.1	chr6	HAVANA	gene	132681590	132714049	-	-1.63245	0.401502	-5.80146	2.09821e-05	0.00324513	2.9567
ENSG00000072682.18	protein_coding	P4HA2	1	OTTHUMG00000059647.11	chr5	HAVANA	gene	132191838	132295315	-	-1.00548	4.61291	-5.79308	2.13367e-05	0.00324513	2.80329
ENSG00000118785.13	protein_coding	SPP1	2	OTTHUMG00000130599.5	chr4	HAVANA	gene	87975650	87983426	+	-0.848676	8.26155	-5.86949	1.83172e-05	0.0030002	2.77518
ENSG00000091844.7	protein_coding	RGS17	2	OTTHUMG00000015858.2	chr6	HAVANA	gene	153004459	153131249	-	-1.18155	2.74152	-5.72416	2.45014e-05	0.00354557	2.74826
ENSG00000099250.17	protein_coding	NRP1	2	OTTHUMG00000019343.5	chr10	HAVANA	gene	33177492	33336262	-	-0.719256	4.8429	-5.81707	2.03372e-05	0.00319079	2.74273
ENSG00000227507.2	protein_coding	LTB	2	OTTHUMG00000031136.5	chr6	HAVANA	gene	31580525	31582522	-	1.79708	0.167775	5.69449	2.60089e-05	0.0036572	2.72784
ENSG00000117318.8	protein_coding	ID3	2	OTTHUMG00000003229.2	chr1	HAVANA	gene	23557918	23559794	-	1.04541	7.68065	5.79696	2.11717e-05	0.00324513	2.69809
ENSG00000152253.8	protein_coding	SPC25	2	OTTHUMG00000132181.9	chr2	HAVANA	gene	168834132	168913371	-	-0.693841	5.56863	-5.77142	2.2283e-05	0.00335483	2.67609
ENSG00000149218.4	protein_coding	ENDOD1	2	OTTHUMG00000167835.1	chr11	HAVANA	gene	95089810	95132645	+	-0.820655	4.29466	-5.73136	2.41493e-05	0.00354557	2.66629
ENSG00000256235.1	protein_coding	SMIM3	2	OTTHUMG00000163646.2	chr5	HAVANA	gene	150777946	150796734	+	-0.994545	5.2784	-5.75216	2.31611e-05	0.00345215	2.62121
ENSG00000145685.13	protein_coding	LHFPL2	1	OTTHUMG00000107579.4	chr5	HAVANA	gene	78485215	78770021	-	-0.759577	5.45142	-5.71793	2.48104e-05	0.00355576	2.6048
ENSG00000152931.7	lincRNA	PART1	2	OTTHUMG00000162213.3	chr5	HAVANA	gene	60487713	60547657	+	-1.20712	3.18355	-5.61557	3.05032e-05	0.00413318	2.59394
ENSG00000072274.12	protein_coding	TFRC	2	OTTHUMG00000155714.2	chr3	HAVANA	gene	196027183	196082189	-	-0.891667	7.33527	-5.72611	2.44055e-05	0.00354557	2.49166
ENSG00000185551.14	protein_coding	NR2F2	2	OTTHUMG00000149848.6	chr15	HAVANA	gene	96325938	96340263	+	0.716284	6.59833	5.64089	2.89802e-05	0.00399953	2.3711
ENSG00000172216.5	protein_coding	CEBPB	2	OTTHUMG00000032715.1	chr20	HAVANA	gene	50190734	50192689	+	-0.833316	7.88238	-5.66774	2.74504e-05	0.00382382	2.36869
ENSG00000215440.11	protein_coding	NPEPL1	2	OTTHUMG00000033060.7	chr20	HAVANA	gene	58689131	58719238	+	0.931395	4.10792	5.5275	3.64753e-05	0.00472751	2.36222
ENSG00000107731.12	protein_coding	UNC5B	2	OTTHUMG00000018422.1	chr10	HAVANA	gene	71212570	71302864	+	1.31551	2.64692	5.47985	4.01961e-05	0.00495143	2.35636
ENSG00000105204.13	protein_coding	DYRK1B	2	OTTHUMG00000182584.5	chr19	HAVANA	gene	39825350	39834201	-	2.14807	2.20214	5.57196	3.33236e-05	0.00439546	2.30758
ENSG00000070404.9	protein_coding	FSTL3	2	OTTHUMG00000180593.14	chr19	HAVANA	gene	676365	683399	+	0.882268	6.00661	5.57262	3.32786e-05	0.00439546	2.29633
ENSG00000154380.17	protein_coding	ENAH	1	OTTHUMG00000037742.10	chr1	HAVANA	gene	225486835	225653142	-	-0.805065	6.98409	-5.6178	3.03657e-05	0.00413318	2.29193
ENSG00000135862.5	protein_coding	LAMC1	1	OTTHUMG00000035418.5	chr1	HAVANA	gene	183023460	183145592	+	-0.582457	6.48205	-5.58674	3.23389e-05	0.00434244	2.2533
ENSG00000115073.7	protein_coding	ACTR1B	2	OTTHUMG00000130549.4	chr2	HAVANA	gene	97655963	97664107	-	0.687537	5.95285	5.56656	3.36905e-05	0.00440489	2.24335
ENSG00000125107.17	protein_coding	CNOT1	1	OTTHUMG00000133487.11	chr16	HAVANA	gene	58519951	58629886	-	-0.908371	4.00106	-5.47123	4.09105e-05	0.00499812	2.21272
ENSG00000184831.13	protein_coding	APOO	2	OTTHUMG00000021259.5	chrX	HAVANA	gene	23833353	23907934	-	-0.653439	6.82189	-5.51691	3.72702e-05	0.0047889	2.09611
ENSG00000114779.19	protein_coding	ABHD14B	2	OTTHUMG00000157816.23	chr3	HAVANA	gene	51968510	51983409	-	0.636626	6.40943	5.49372	3.90744e-05	0.00493562	2.08077
ENSG00000105612.8	protein_coding	DNASE2	2	OTTHUMG00000180535.2	chr19	HAVANA	gene	12875211	12881468	-	0.792464	5.41273	5.44133	4.34891e-05	0.00526995	2.06583
ENSG00000163710.7	protein_coding	PCOLCE2	1	OTTHUMG00000159312.1	chr3	HAVANA	gene	142815922	142889203	-	-0.626488	6.33411	-5.4879	3.95415e-05	0.00493927	2.06542
ENSG00000106003.12	protein_coding	LFNG	1	OTTHUMG00000152043.1	chr7	HAVANA	gene	2512529	2529177	+	-0.789891	3.60161	-5.40114	4.7221e-05	0.00566227	2.06325
ENSG00000134013.15	protein_coding	LOXL2	1	OTTHUMG00000163797.5	chr8	HAVANA	gene	23297189	23425328	-	0.617981	6.05114	5.48512	3.9766e-05	0.00493927	2.06283
ENSG00000105825.11	protein_coding	TFPI2	1	OTTHUMG00000022963.3	chr7	HAVANA	gene	93885397	93890991	-	0.585857	7.20555	5.50949	3.78381e-05	0.00482032	2.02138
ENSG00000187908.17	protein_coding	DMBT1	2	OTTHUMG00000019185.3	chr10	HAVANA	gene	122560665	122643736	+	1.81297	-0.126716	5.3042	5.76408e-05	0.00645967	1.97815
ENSG00000163993.6	protein_coding	S100P	2	OTTHUMG00000090491.4	chr4	HAVANA	gene	6693069	6697170	+	2.59575	-0.156288	5.71091	2.51632e-05	0.00357197	1.97735
ENSG00000140044.12	protein_coding	JDP2	2	OTTHUMG00000171869.2	chr14	HAVANA	gene	75427716	75474111	+	2.03162	2.37542	5.30832	5.71531e-05	0.00645967	1.95273
ENSG00000110218.8	protein_coding	PANX1	2	OTTHUMG00000167757.1	chr11	HAVANA	gene	94128928	94181972	+	-0.861374	4.26609	-5.35945	5.14425e-05	0.00600123	1.94711
ENSG00000182326.14	protein_coding	C1S	1	OTTHUMG00000150305.4	chr12	HAVANA	gene	6988259	7071032	+	-0.83761	6.30653	-5.39841	4.74864e-05	0.00566227	1.90357
ENSG00000168209.4	protein_coding	DDIT4	2	OTTHUMG00000183961.1	chr10	HAVANA	gene	72273920	72276036	+	1.47105	3.20793	5.20893	7.01942e-05	0.00699258	1.8178
ENSG00000115902.10	protein_coding	SLC1A4	1	OTTHUMG00000129537.3	chr2	HAVANA	gene	64988477	65023865	+	0.931544	4.46727	5.28058	6.05202e-05	0.00667348	1.77875
ENSG00000116729.13	protein_coding	WLS	2	OTTHUMG00000009153.4	chr1	HAVANA	gene	68098473	68233120	-	-0.712442	5.87587	-5.33925	5.36248e-05	0.00619595	1.7589
ENSG00000130818.11	protein_coding	ZNF426	1	OTTHUMG00000180132.3	chr19	HAVANA	gene	9523224	9538645	-	0.922045	3.90405	5.21529	6.92744e-05	0.00699258	1.75363
ENSG00000164056.10	protein_coding	SPRY1	2	OTTHUMG00000133071.3	chr4	HAVANA	gene	123396795	123403760	+	-0.843463	2.7084	-5.22875	6.73686e-05	0.00699258	1.72515
ENSG00000263155.5	protein_coding	MYZAP	2	OTTHUMG00000132453.7	chr15	HAVANA	gene	57591941	57685364	+	1.08994	2.40842	5.18944	7.30909e-05	0.00704018	1.71445
ENSG00000150556.16	protein_coding	LYPD6B	1	OTTHUMG00000153743.3	chr2	HAVANA	gene	149038107	149215262	+	0.918888	2.44514	5.18864	7.32122e-05	0.00704018	1.69852
ENSG00000115414.18	protein_coding	FN1	2	OTTHUMG00000133054.6	chr2	HAVANA	gene	215360440	215436172	-	-0.696948	9.66557	-5.36475	5.08847e-05	0.00600123	1.68566
ENSG00000250303.3	lincRNA	RP11-356J5.12	1	OTTHUMG00000167191.2	chr11	HAVANA	gene	112270749	112362534	+	0.969483	5.19676	5.21033	6.99912e-05	0.00699258	1.6649
ENSG00000135046.13	protein_coding	ANXA1	2	OTTHUMG00000020016.2	chr9	HAVANA	gene	73151757	73170393	+	-3.43993	4.77599	-5.2342	6.66131e-05	0.00699203	1.65249
ENSG00000163735.6	protein_coding	CXCL5	2	OTTHUMG00000160871.1	chr4	HAVANA	gene	73995642	73998779	-	-0.516383	10.0818	-5.33248	5.43774e-05	0.00623458	1.60178
ENSG00000228253.1	protein_coding	MT-ATP8	3	NA	chrM	ENSEMBL	gene	8366	8572	+	3.02207	3.15055	5.08841	9.01958e-05	0.00824766	1.59505
ENSG00000074590.13	protein_coding	NUAK1	1	OTTHUMG00000169763.4	chr12	HAVANA	gene	106063340	106140033	-	1.03273	3.61051	5.13396	8.2027e-05	0.00765388	1.59456
ENSG00000177138.15	protein_coding	FAM9B	2	OTTHUMG00000021114.3	chrX	HAVANA	gene	9024232	9164639	-	2.35614	-1.06547	5.30527	5.75139e-05	0.00645967	1.58865
ENSG00000204388.6	protein_coding	HSPA1B	2	OTTHUMG00000031202.2	chr6	HAVANA	gene	31827735	31830255	+	-0.643034	5.47737	-5.21952	6.86694e-05	0.00699258	1.58157
ENSG00000142949.16	protein_coding	PTPRF	2	OTTHUMG00000007501.5	chr1	HAVANA	gene	43525187	43623666	+	0.611667	7.25893	5.28705	5.97177e-05	0.00664248	1.57779
ENSG00000166592.11	protein_coding	RRAD	2	OTTHUMG00000137511.4	chr16	HAVANA	gene	66921679	66925644	-	-0.63344	7.9439	-5.27646	6.10374e-05	0.00667348	1.56926
ENSG00000154027.18	protein_coding	AK5	1	OTTHUMG00000009796.7	chr1	HAVANA	gene	77282051	77559969	+	0.912599	3.96109	5.13317	8.21617e-05	0.00765388	1.56021
ENSG00000133131.14	protein_coding	MORC4	2	OTTHUMG00000022155.4	chrX	HAVANA	gene	106813871	107000244	-	-0.679985	4.21417	-5.20402	7.09128e-05	0.00699258	1.55709
ENSG00000173702.7	protein_coding	MUC13	2	OTTHUMG00000159484.5	chr3	HAVANA	gene	124905442	124953819	-	3.53909	-0.731074	5.35855	5.15369e-05	0.00600123	1.54702
ENSG00000166803.12	protein_coding	PCLAF	1	OTTHUMG00000133017.4	chr15	HAVANA	gene	64364311	64387687	-	-1.16257	6.16831	-5.24392	6.52866e-05	0.00690139	1.54628
ENSG00000115594.11	protein_coding	IL1R1	1	OTTHUMG00000130783.5	chr2	HAVANA	gene	102064544	102179874	+	-1.41779	3.56347	-5.13322	8.21527e-05	0.00765388	1.54363
ENSG00000157350.12	protein_coding	ST3GAL2	2	OTTHUMG00000137580.5	chr16	HAVANA	gene	70375978	70439237	-	-0.564379	6.75054	-5.24685	6.48918e-05	0.00690139	1.52714
ENSG00000145425.9	protein_coding	RPS3A	1	OTTHUMG00000161445.3	chr4	HAVANA	gene	151099573	151104652	+	-1.85519	5.25129	-5.20133	7.13098e-05	0.00699258	1.52608
ENSG00000124191.17	protein_coding	C20orf100	2	OTTHUMG00000032517.5	chr20	HAVANA	gene	43914864	44069616	+	-0.777398	3.83061	-5.21167	6.97961e-05	0.00699258	1.5213
ENSG00000145623.12	protein_coding	OSMR	1	OTTHUMG00000090811.2	chr5	HAVANA	gene	38845858	38945596	+	-0.804674	5.99343	-5.24647	6.49425e-05	0.00690139	1.51971
ENSG00000230487.7	lincRNA	AC093734.11	1	OTTHUMG00000151452.3	chr7	HAVANA	gene	1570073	1589626	+	1.07081	4.24371	5.10289	8.75129e-05	0.00805172	1.50525
ENSG00000264301.1	lincRNA	RP11-527H14.3	2	OTTHUMG00000178812.1	chr18	HAVANA	gene	14969001	14970468	-	-1.08986	2.46735	-5.05488	9.67391e-05	0.00868612	1.50298
ENSG00000164105.3	protein_coding	SAP30	1	OTTHUMG00000160798.2	chr4	HAVANA	gene	173369969	173377532	+	-0.905418	6.25999	-5.20967	7.00867e-05	0.00699258	1.50215
ENSG00000109861.15	protein_coding	CTSC	2	OTTHUMG00000167290.3	chr11	HAVANA	gene	88293592	88337787	-	-0.631659	9.19692	-5.26564	6.24177e-05	0.00674156	1.4939
ENSG00000054392.12	protein_coding	HHAT	2	OTTHUMG00000036447.3	chr1	HAVANA	gene	210328252	210676296	+	1.46569	1.81768	5.02575	0.00010282	0.00906823	1.47572
ENSG00000133104.12	protein_coding	SPG20	2	OTTHUMG00000016730.4	chr13	HAVANA	gene	36301638	36370180	-	-1.14722	4.85815	-5.15906	7.7853e-05	0.00743845	1.4704
ENSG00000169271.2	protein_coding	HSPB3	2	OTTHUMG00000096995.2	chr5	HAVANA	gene	54455601	54456384	+	-0.724909	5.92085	-5.12097	8.4276e-05	0.00780207	1.46751
ENSG00000109511.11	protein_coding	ANXA10	2	OTTHUMG00000161275.2	chr4	HAVANA	gene	168092515	168187690	+	-0.631768	6.29778	-5.2056	7.06808e-05	0.00699258	1.43062
ENSG00000006534.15	protein_coding	ALDH3B1	2	OTTHUMG00000154910.7	chr11	HAVANA	gene	68008578	68029282	+	1.01166	4.46642	5.04363	9.90427e-05	0.00883971	1.42893
ENSG00000155660.10	protein_coding	PDIA4	1	OTTHUMG00000150248.2	chr7	HAVANA	gene	149003062	149028641	-	-0.50727	8.46117	-5.19051	7.29286e-05	0.00704018	1.35777
ENSG00000074410.13	protein_coding	CA12	2	OTTHUMG00000132881.2	chr15	HAVANA	gene	63321378	63382161	-	-0.58051	8.51504	-5.13867	8.12264e-05	0.00765388	1.24879
ENSG00000122591.11	protein_coding	FAM126A	1	OTTHUMG00000128435.3	chr7	HAVANA	gene	22889371	23014130	-	-0.879937	3.67946	-4.98384	0.000112261	0.00961638	1.23139
ENSG00000127399.14	protein_coding	LRRC61	2	OTTHUMG00000158326.1	chr7	HAVANA	gene	150322639	150338150	+	-0.779567	6.0304	-5.07126	9.34851e-05	0.00849632	1.20962
ENSG00000077150.18	protein_coding	NFKB2	2	OTTHUMG00000018962.4	chr10	HAVANA	gene	102394110	102402529	+	0.71063	4.64412	4.97435	0.000114519	0.00969835	1.15544
ENSG00000203760.8	protein_coding	CENPW	2	OTTHUMG00000015518.1	chr6	HAVANA	gene	126340174	126348875	+	-0.597228	7.35198	-5.06095	9.55207e-05	0.0086287	1.11802
ENSG00000146733.13	protein_coding	PSPH	2	OTTHUMG00000023441.10	chr7	HAVANA	gene	56011051	56051604	-	0.894428	4.78396	4.96048	0.000117901	0.00992837	1.11705
ENSG00000113387.11	protein_coding	SUB1	2	OTTHUMG00000131071.4	chr5	HAVANA	gene	32531633	32604079	+	-0.881067	5.2239	-4.99574	0.000109492	0.00943344	1.1148
ENSG00000182584.4	protein_coding	ACTL10	2	OTTHUMG00000032262.1	chr20	HAVANA	gene	33666498	33668525	+	1.40842	1.63713	4.84773	0.000149508	0.0118533	1.11322
ENSG00000095383.19	protein_coding	TBC1D2	2	OTTHUMG00000020343.3	chr9	HAVANA	gene	98198999	98255721	-	1.71661	2.28711	4.83922	0.00015222	0.0120044	1.10888
ENSG00000179862.6	protein_coding	CITED4	2	OTTHUMG00000007728.1	chr1	HAVANA	gene	40861051	40862366	-	0.789929	5.06997	5.01218	0.000105785	0.00922058	1.09533
ENSG00000124788.18	protein_coding	ATXN1	2	OTTHUMG00000014303.5	chr6	HAVANA	gene	16299112	16761491	-	-0.713318	4.38093	-4.936	0.000124128	0.0102707	1.09506
ENSG00000115380.19	protein_coding	EFEMP1	2	OTTHUMG00000129343.6	chr2	HAVANA	gene	55865967	55924139	-	0.929974	6.74887	5.03449	0.000100955	0.00895679	1.07836
ENSG00000141391.13	protein_coding	PRELID3A	2	OTTHUMG00000131694.3	chr18	HAVANA	gene	12407896	12432238	+	0.812506	4.6296	4.92284	0.000127614	0.0103939	1.06748
ENSG00000128564.6	protein_coding	VGF	2	OTTHUMG00000157109.2	chr7	HAVANA	gene	101162509	101165593	-	1.22336	1.11041	4.78428	0.00017098	0.0131364	0.997787
ENSG00000067182.7	protein_coding	TNFRSF1A	1	OTTHUMG00000168267.3	chr12	HAVANA	gene	6328757	6342114	-	-0.670781	6.83082	-4.99611	0.000109407	0.00943344	0.997274
ENSG00000157193.15	protein_coding	LRP8	1	OTTHUMG00000008924.5	chr1	HAVANA	gene	53242364	53328070	-	-0.665483	4.83285	-4.929	0.00012597	0.0103164	0.985939
ENSG00000156787.16	protein_coding	TBC1D31	1	OTTHUMG00000165081.8	chr8	HAVANA	gene	123041968	123152153	+	-0.789334	4.03909	-4.86953	0.000142784	0.0113807	0.977784
ENSG00000100311.16	protein_coding	PDGFB	1	OTTHUMG00000151029.15	chr22	HAVANA	gene	39223359	39244751	-	0.983962	2.70781	4.80337	0.000164208	0.0126814	0.963722
ENSG00000127585.11	protein_coding	FBXL16	2	OTTHUMG00000090420.3	chr16	HAVANA	gene	692498	705829	-	3.06977	-0.179116	5.27407	6.13396e-05	0.00667348	0.961214
ENSG00000136732.15	protein_coding	GYPC	1	OTTHUMG00000131464.3	chr2	HAVANA	gene	126655933	126696670	+	0.87161	2.98438	4.82561	0.000156662	0.0122897	0.94561
ENSG00000213694.3	protein_coding	S1PR3	2	OTTHUMG00000020173.2	chr9	HAVANA	gene	88991447	89005010	+	-0.801884	4.51633	-4.87229	0.000141955	0.0113768	0.927287
ENSG00000114812.12	protein_coding	VIPR1	1	OTTHUMG00000131792.8	chr3	HAVANA	gene	42489299	42537573	+	1.22866	1.12909	4.74022	0.000187724	0.0138516	0.917277
ENSG00000171848.14	protein_coding	RRM2	2	OTTHUMG00000185555.3	chr2	HAVANA	gene	10120698	10131419	+	-0.882474	7.54499	-4.97576	0.00011418	0.00969835	0.91662
ENSG00000100100.12	protein_coding	PIK3IP1	2	OTTHUMG00000151256.2	chr22	HAVANA	gene	31281593	31292534	-	2.6226	2.1997	4.88832	0.000137236	0.0111169	0.907207
ENSG00000039560.13	protein_coding	RAI14	2	OTTHUMG00000162019.3	chr5	HAVANA	gene	34656237	34832627	+	-0.521344	6.63901	-4.94053	0.00012295	0.0102379	0.891945
ENSG00000031698.12	protein_coding	SARS	2	OTTHUMG00000011726.3	chr1	HAVANA	gene	109213918	109238169	+	0.612735	6.77544	4.93373	0.000124723	0.0102707	0.885374
ENSG00000122545.19	protein_coding	2018-09-07	2	OTTHUMG00000155063.5	chr7	HAVANA	gene	35800932	35907105	+	-1.34123	3.92394	-4.81385	0.000160607	0.0124679	0.843258
ENSG00000261105.5	antisense	RP11-173B14.5	2	OTTHUMG00000172803.1	chr13	HAVANA	gene	75604700	75635994	-	1.16968	2.09284	4.69601	0.000206205	0.0149199	0.831223
ENSG00000143878.9	protein_coding	RHOB	2	OTTHUMG00000090755.3	chr2	HAVANA	gene	20447074	20449445	+	0.969914	4.6208	4.76712	0.000177313	0.013484	0.819895
ENSG00000151790.8	protein_coding	TDO2	2	OTTHUMG00000161838.5	chr4	HAVANA	gene	155854738	155920406	+	-2.5846	1.02168	-4.68724	0.000210085	0.0150391	0.790126
ENSG00000182752.9	protein_coding	PAPPA	2	OTTHUMG00000021045.1	chr9	HAVANA	gene	116153804	116402322	+	-1.05493	2.02291	-4.71007	0.000200136	0.0146227	0.738297
ENSG00000196998.17	protein_coding	WDR45	2	OTTHUMG00000034500.10	chrX	HAVANA	gene	49071470	49101170	-	0.846776	4.69991	4.77091	0.000175895	0.0134447	0.73265
ENSG00000071575.11	protein_coding	TRIB2	1	OTTHUMG00000090575.4	chr2	HAVANA	gene	12716889	12742734	+	-0.720296	3.31857	-4.75708	0.000181126	0.0135926	0.724289
ENSG00000173727.12	transcribed_unprocessed_pseudogene	CMB9-22P13.1	2	OTTHUMG00000186654.3	chr11	HAVANA	gene	65455258	65466720	+	-0.752706	4.7658	-4.74447	0.000186038	0.0138302	0.694498
ENSG00000026508.18	protein_coding	CD44	1	OTTHUMG00000044388.9	chr11	HAVANA	gene	35138870	35232402	+	-0.49835	7.1638	-4.87223	0.000141972	0.0113768	0.681101
ENSG00000213190.3	protein_coding	MLLT11	2	OTTHUMG00000035160.2	chr1	HAVANA	gene	151057758	151068497	+	-0.821231	6.47525	-4.81989	0.00015857	0.0123743	0.671562
ENSG00000107984.9	protein_coding	DKK1	2	OTTHUMG00000018247.1	chr10	HAVANA	gene	52314296	52318042	+	0.820279	4.63313	4.76297	0.00017888	0.013534	0.658776
ENSG00000152583.12	protein_coding	SPARCL1	1	OTTHUMG00000130605.5	chr4	HAVANA	gene	87473335	87531061	-	-1.25133	3.44921	-4.60636	0.000249592	0.0168333	0.652272
ENSG00000068028.17	protein_coding	RASSF1	2	OTTHUMG00000149958.6	chr3	HAVANA	gene	50329782	50340980	-	0.799416	3.86278	4.66487	0.000220328	0.0154905	0.605566
ENSG00000147408.14	protein_coding	CSGALNACT1	1	OTTHUMG00000130827.5	chr8	HAVANA	gene	19404161	19758029	-	1.13934	3.2858	4.63222	0.000236198	0.0161493	0.58349
ENSG00000213722.8	protein_coding	DDAH2	2	OTTHUMG00000031212.6	chr6	HAVANA	gene	31727038	31730617	-	-1.07842	4.54356	-4.69931	0.000204765	0.0148879	0.577726
ENSG00000137513.9	protein_coding	NARS2	1	OTTHUMG00000166702.3	chr11	HAVANA	gene	78435961	78574874	-	-0.928257	4.15932	-4.6851	0.000211045	0.0150391	0.569431
ENSG00000109079.9	protein_coding	TNFAIP1	1	OTTHUMG00000132501.4	chr17	HAVANA	gene	28335602	28347009	+	0.542959	5.20343	4.7296	0.000192001	0.0140974	0.560677
ENSG00000127990.16	protein_coding	SGCE	2	OTTHUMG00000022828.17	chr7	HAVANA	gene	94524204	94656572	-	-0.674632	6.54619	-4.75617	0.000181477	0.0135926	0.519367
ENSG00000260401.1	sense_overlapping	RP11-800A3.4	2	OTTHUMG00000167967.1	chr11	HAVANA	gene	73238975	73242335	+	-1.08399	1.56291	-4.53183	0.000292685	0.019218	0.493156
ENSG00000258655.2	antisense	RP11-431H16.2	2	OTTHUMG00000170588.2	chr14	HAVANA	gene	32074946	32076793	-	-0.643768	4.17044	-4.6364	0.000234108	0.0160801	0.459998
ENSG00000129355.6	protein_coding	CDKN2D	2	OTTHUMG00000180583.1	chr19	HAVANA	gene	10566462	10569059	-	-0.626795	4.44835	-4.65569	0.00022468	0.015639	0.414638
ENSG00000237765.6	protein_coding	FAM200B	2	OTTHUMG00000160279.3	chr4	HAVANA	gene	15681662	15705565	+	0.650493	5.40933	4.66095	0.000222178	0.0155472	0.413574
ENSG00000005884.17	protein_coding	ITGA3	2	OTTHUMG00000161890.6	chr17	HAVANA	gene	50055968	50090481	+	0.656787	5.86814	4.68953	0.000209065	0.0150391	0.377905
ENSG00000113739.10	protein_coding	STC2	1	OTTHUMG00000130542.4	chr5	HAVANA	gene	173314713	173329503	-	0.705468	5.48749	4.65309	0.000225926	0.015639	0.345019
ENSG00000113070.7	protein_coding	HBEGF	2	OTTHUMG00000129496.4	chr5	HAVANA	gene	140332843	140346631	-	0.695046	3.58514	4.58374	0.000261941	0.0175078	0.342728
ENSG00000253320.5	antisense	KB-1507C5.2	1	OTTHUMG00000164825.2	chr8	HAVANA	gene	102864300	102977876	+	1.63057	1.50357	4.46466	0.000337989	0.0216211	0.335764
ENSG00000023839.10	protein_coding	ABCC2	2	OTTHUMG00000018895.1	chr10	HAVANA	gene	99782732	99852192	+	-0.878811	4.22437	-4.52402	0.000297623	0.0194564	0.314532
ENSG00000164120.13	protein_coding	HPGD	1	OTTHUMG00000160772.7	chr4	HAVANA	gene	174490177	174523154	-	-2.1073	2.23893	-4.45873	0.000342321	0.0217119	0.303007
ENSG00000106261.16	protein_coding	ZKSCAN1	2	OTTHUMG00000156534.3	chr7	HAVANA	gene	100015572	100041689	+	0.555806	5.87335	4.6173	0.000243835	0.0165198	0.291861
ENSG00000153815.16	protein_coding	CMIP	1	OTTHUMG00000176520.4	chr16	HAVANA	gene	81445170	81711762	+	0.850397	5.52028	4.59601	0.000255167	0.0171318	0.288897
ENSG00000154310.16	protein_coding	TNIK	1	OTTHUMG00000159036.3	chr3	HAVANA	gene	171061339	171460408	-	-1.09672	2.38238	-4.44944	0.000349213	0.0220359	0.279896
ENSG00000113657.12	protein_coding	DPYSL3	2	OTTHUMG00000163437.3	chr5	HAVANA	gene	147390811	147510056	-	-0.626576	8.05594	-4.66762	0.000219044	0.0154732	0.278639
ENSG00000152795.17	protein_coding	HNRNPDL	2	OTTHUMG00000130299.6	chr4	HAVANA	gene	82422564	82430408	-	-0.524704	8.87363	-4.65162	0.000226637	0.015639	0.203978
ENSG00000178726.6	protein_coding	THBD	2	OTTHUMG00000032053.2	chr20	HAVANA	gene	23045633	23049741	-	-1.18237	4.85331	-4.57894	0.000264643	0.0176094	0.203582
ENSG00000245648.1	antisense	RP11-277P12.20	2	OTTHUMG00000168533.4	chr12	HAVANA	gene	10363769	10398506	+	-1.08073	4.01256	-4.45955	0.000341714	0.0217119	0.203103
ENSG00000164161.9	protein_coding	HHIP	2	OTTHUMG00000161428.2	chr4	HAVANA	gene	144646021	144745271	+	1.58008	-0.122497	4.37121	0.000413141	0.0248301	0.2005
ENSG00000026025.15	protein_coding	VIM	2	OTTHUMG00000017744.5	chr10	HAVANA	gene	17228259	17237593	+	0.486302	11.8085	4.68322	0.00021189	0.0150391	0.189003
ENSG00000174720.15	protein_coding	LARP7	1	OTTHUMG00000132909.5	chr4	HAVANA	gene	112636964	112657592	+	-1.92581	2.89266	-4.4307	0.000363547	0.0227675	0.185058
ENSG00000136826.14	protein_coding	KLF4	2	OTTHUMG00000020449.3	chr9	HAVANA	gene	107484852	107490482	-	0.814339	3.7684	4.50403	0.00031064	0.0200437	0.183773
ENSG00000134574.11	protein_coding	DDB2	2	OTTHUMG00000187453.6	chr11	HAVANA	gene	47214465	47239240	+	0.751619	4.61492	4.50598	0.000309342	0.0200437	0.169095
ENSG00000164855.15	protein_coding	TMEM184A	2	OTTHUMG00000119025.12	chr7	HAVANA	gene	1542235	1560821	-	1.29074	1.9531	4.35207	0.000430513	0.0255649	0.159783
ENSG00000100867.14	protein_coding	DHRS2	2	OTTHUMG00000028771.5	chr14	HAVANA	gene	23630115	23645639	+	3.95941	-0.617717	4.94227	0.000122502	0.0102379	0.149676
ENSG00000188015.9	protein_coding	S100A3	2	OTTHUMG00000013550.2	chr1	HAVANA	gene	153547329	153549372	-	-0.837261	5.36924	-4.5049	0.000310056	0.0200437	0.127465
ENSG00000164919.10	protein_coding	COX6C	2	OTTHUMG00000164703.4	chr8	HAVANA	gene	99873200	99894062	-	-1.30487	5.55318	-4.53996	0.000287643	0.0189704	0.125774
ENSG00000125122.15	protein_coding	AC040160.13	1	OTTHUMG00000154403.3	chr16	HAVANA	gene	67207139	67227048	-	1.39933	1.94113	4.33184	0.00044969	0.0264115	0.123459
ENSG00000163132.6	protein_coding	MSX1	2	OTTHUMG00000090335.4	chr4	HAVANA	gene	4859666	4863936	+	-0.567634	5.70749	-4.56776	0.00027104	0.0179549	0.12027
ENSG00000113594.9	protein_coding	LIFR	2	OTTHUMG00000131138.3	chr5	HAVANA	gene	38474963	38608354	-	-1.28612	3.1337	-4.39364	0.000393682	0.0240485	0.0978269
ENSG00000129173.12	protein_coding	E2F8	1	OTTHUMG00000166102.4	chr11	HAVANA	gene	19224063	19241620	-	-0.819072	3.32617	-4.39995	0.000388379	0.0239206	0.0522894
ENSG00000265962.1	antisense	RP11-674N23.1	2	OTTHUMG00000178955.1	chr18	HAVANA	gene	8695856	8707621	-	3.19577	0.147829	4.61843	0.000243251	0.0165198	0.0485134
ENSG00000197971.14	protein_coding	MBP	1	OTTHUMG00000132874.8	chr18	HAVANA	gene	76978827	77133683	-	0.591292	3.71311	4.44788	0.000350387	0.0220359	0.015956
ENSG00000138166.5	protein_coding	DUSP5	2	OTTHUMG00000019040.1	chr10	HAVANA	gene	110497838	110511544	+	-0.914544	1.28773	-4.33302	0.000448546	0.0264115	-0.000145913
ENSG00000162407.8	protein_coding	PLPP3	2	OTTHUMG00000008160.2	chr1	HAVANA	gene	56494747	56645301	-	-0.741449	4.78541	-4.40454	0.000384565	0.0238825	-0.0124873
ENSG00000223784.1	lincRNA	RP11-554I8.2	1	OTTHUMG00000017625.1	chr10	HAVANA	gene	6737382	6739026	+	1.30748	2.43256	4.27804	0.000504986	0.0279807	-0.0136742
ENSG00000189068.10	protein_coding	VSTM1	2	OTTHUMG00000064906.7	chr19	HAVANA	gene	54040825	54063953	-	3.9164	-2.65933	5.02111	0.000103824	0.00910292	-0.0175816
ENSG00000278703.1	lincRNA	RP11-706P11.2	2	OTTHUMG00000186554.1	chr18	HAVANA	gene	57588611	57589091	-	1.23939	1.94132	4.2569	0.000528567	0.0287529	-0.0231349
ENSG00000163902.11	protein_coding	RPN1	2	OTTHUMG00000159691.3	chr3	HAVANA	gene	128619970	128681075	-	-0.531305	6.84755	-4.49427	0.000317203	0.0203789	-0.0586127
ENSG00000232453.6	lincRNA	RP4-794H19.1	2	OTTHUMG00000008375.2	chr1	HAVANA	gene	58882868	58903747	-	2.55584	-0.522088	4.40262	0.000386158	0.0238825	-0.0671682
ENSG00000164741.14	protein_coding	DLC1	1	OTTHUMG00000090825.9	chr8	HAVANA	gene	13083361	13604610	-	1.06708	1.86854	4.28184	0.00050087	0.0278562	-0.0690348
ENSG00000232723.1	processed_pseudogene	AC013399.3	1	OTTHUMG00000155142.1	chr2	HAVANA	gene	121309995	121310412	+	-3.22124	-1.7461	-4.74328	0.000186505	0.0138302	-0.0802996
ENSG00000176165.10	protein_coding	FOXG1	2	OTTHUMG00000140187.6	chr14	HAVANA	gene	28760330	28770277	+	-0.599906	4.49036	-4.41632	0.000374951	0.0233835	-0.0964287
ENSG00000116704.7	protein_coding	SLC35D1	2	OTTHUMG00000009360.1	chr1	HAVANA	gene	66999332	67054099	-	-1.15648	2.87993	-4.27178	0.00051186	0.0281523	-0.100728
ENSG00000272172.1	antisense	RP13-582O9.7	2	OTTHUMG00000185627.1	chr8	HAVANA	gene	143290399	143290621	-	1.77804	1.01721	4.25108	0.000535245	0.0290103	-0.116873
ENSG00000140465.13	protein_coding	CYP1A1	1	OTTHUMG00000142812.4	chr15	HAVANA	gene	74719542	74725610	-	2.56979	0.44002	4.30997	0.000471387	0.027054	-0.124035
ENSG00000143367.15	protein_coding	TUFT1	2	OTTHUMG00000012536.3	chr1	HAVANA	gene	151540305	151583583	+	1.26117	3.14572	4.20936	0.000585723	0.0305899	-0.141738
ENSG00000144821.9	protein_coding	MYH15	2	OTTHUMG00000159226.2	chr3	HAVANA	gene	108380369	108529322	-	-1.22052	0.15738	-4.18027	0.000623748	0.0313029	-0.200272
ENSG00000217801.9	transcribed_unprocessed_pseudogene	RP11-465B22.3	2	OTTHUMG00000000629.3	chr1	HAVANA	gene	1059734	1069355	+	1.13329	2.45	4.19792	0.000600389	0.0308209	-0.201507
ENSG00000169288.17	protein_coding	MRPL1	2	OTTHUMG00000130200.4	chr4	HAVANA	gene	77862520	77952790	+	-0.921326	4.2236	-4.31921	0.00046209	0.0268663	-0.217361
ENSG00000142627.12	protein_coding	EPHA2	2	OTTHUMG00000009527.2	chr1	HAVANA	gene	16124337	16156087	-	0.567706	3.5207	4.3917	0.000395326	0.0240503	-0.224112
ENSG00000136146.14	protein_coding	MED4	1	OTTHUMG00000016891.3	chr13	HAVANA	gene	48053323	48095131	-	-0.631283	5.64505	-4.37624	0.000408693	0.0246622	-0.238118
ENSG00000148926.9	protein_coding	ADM	2	OTTHUMG00000165907.1	chr11	HAVANA	gene	10304680	10307397	+	-0.742273	5.19272	-4.35658	0.000426356	0.0254194	-0.239959
ENSG00000170921.15	protein_coding	TANC2	2	OTTHUMG00000179103.2	chr17	HAVANA	gene	63009556	63427699	+	-0.666243	4.77141	-4.30891	0.000472468	0.027054	-0.24228
ENSG00000169604.19	protein_coding	ANTXR1	1	OTTHUMG00000129575.7	chr2	HAVANA	gene	69013178	69249327	+	0.847926	5.20254	4.36894	0.000415165	0.0248516	-0.248673
ENSG00000103021.9	protein_coding	CCDC113	1	OTTHUMG00000133489.3	chr16	HAVANA	gene	58231157	58283836	+	0.563987	4.31595	4.28281	0.000499816	0.0278562	-0.266191
ENSG00000134339.8	protein_coding	SAA2	1	OTTHUMG00000166484.1	chr11	HAVANA	gene	18239223	18248643	-	-1.23827	1.0398	-4.1536	0.000660799	0.0328307	-0.267362
ENSG00000125618.16	protein_coding	PAX8	1	OTTHUMG00000128529.11	chr2	HAVANA	gene	113215997	113278950	-	1.25565	3.28682	4.17657	0.000628751	0.0314481	-0.271105
ENSG00000065325.12	protein_coding	GLP2R	2	OTTHUMG00000130269.11	chr17	HAVANA	gene	9822206	9892102	+	2.29551	0.362232	4.24183	0.000546046	0.0292763	-0.273576
ENSG00000178882.14	protein_coding	FAM101A	2	OTTHUMG00000168609.5	chr12	HAVANA	gene	123973241	124316024	+	0.594346	6.48524	4.3945	0.000392956	0.0240485	-0.277006
ENSG00000123374.10	protein_coding	CDK2	1	OTTHUMG00000170575.1	chr12	HAVANA	gene	55966769	55972784	+	-0.930447	3.19994	-4.22451	0.000566854	0.0300675	-0.277976
ENSG00000125384.6	protein_coding	PTGER2	2	OTTHUMG00000140300.2	chr14	HAVANA	gene	52314305	52328606	+	-0.985015	2.99117	-4.1884	0.000612878	0.0308681	-0.280456
ENSG00000182010.10	protein_coding	RTKN2	2	OTTHUMG00000018299.5	chr10	HAVANA	gene	62183035	62268707	-	-0.704445	5.09652	-4.31015	0.000471207	0.027054	-0.293891
ENSG00000148677.6	protein_coding	ANKRD1	2	OTTHUMG00000018734.1	chr10	HAVANA	gene	90912096	90921276	-	1.84635	-0.319891	4.11274	0.000721918	0.0339026	-0.305704
ENSG00000104611.11	protein_coding	SH2D4A	1	OTTHUMG00000097005.3	chr8	HAVANA	gene	19313617	19396218	+	0.728089	4.75603	4.28601	0.000496377	0.0278562	-0.311947
ENSG00000167642.12	protein_coding	SPINT2	1	OTTHUMG00000181891.3	chr19	HAVANA	gene	38244035	38292614	+	1.14821	2.30217	4.11829	0.000713292	0.0339026	-0.314791
ENSG00000221963.5	protein_coding	APOL6	2	OTTHUMG00000150615.2	chr22	HAVANA	gene	35648395	35668409	+	0.817253	4.01621	4.24271	0.000545006	0.0292763	-0.318286
ENSG00000136147.17	protein_coding	PHF11	1	OTTHUMG00000016916.5	chr13	HAVANA	gene	49495610	49528987	+	0.780751	3.53954	4.20371	0.000592919	0.0306856	-0.322178
ENSG00000174891.12	protein_coding	RSRC1	1	OTTHUMG00000158758.12	chr3	HAVANA	gene	158105855	158545730	+	-0.665776	4.77475	-4.29005	0.000492076	0.0278562	-0.327914
ENSG00000167972.13	protein_coding	ABCA3	1	OTTHUMG00000128845.2	chr16	HAVANA	gene	2275881	2340746	-	0.750446	3.80488	4.23014	0.000560005	0.0298102	-0.329797
ENSG00000188766.12	protein_coding	SPRED3	2	OTTHUMG00000182082.4	chr19	HAVANA	gene	38388421	38399587	+	-1.24621	-0.166526	-4.10046	0.000741381	0.0345321	-0.348966
ENSG00000117500.12	protein_coding	TMED5	2	OTTHUMG00000010162.4	chr1	HAVANA	gene	93149742	93180728	-	-0.606083	5.4336	-4.30589	0.000475556	0.027054	-0.357843
ENSG00000092820.17	protein_coding	EZR	2	OTTHUMG00000015917.1	chr6	HAVANA	gene	158765741	158819412	-	0.53515	6.49881	4.33143	0.000450086	0.0264115	-0.371249
ENSG00000249306.5	lincRNA	RP11-267A15.1	2	OTTHUMG00000163128.3	chr5	HAVANA	gene	174336295	174532457	+	-0.90566	2.71448	-4.19648	0.000602258	0.0308209	-0.373563
ENSG00000070669.16	protein_coding	ASNS	1	OTTHUMG00000022892.13	chr7	HAVANA	gene	97852118	97872542	-	2.22369	0.744233	4.11674	0.00071568	0.0339026	-0.380416
ENSG00000175115.11	protein_coding	PACS1	1	OTTHUMG00000166889.4	chr11	HAVANA	gene	66070363	66244747	+	0.723622	4.97426	4.28575	0.000496663	0.0278562	-0.382787
ENSG00000170425.3	protein_coding	ADORA2B	2	OTTHUMG00000059140.2	chr17	HAVANA	gene	15944917	15975746	+	-0.588888	5.55586	-4.30684	0.000474581	0.027054	-0.394577
ENSG00000197448.13	protein_coding	GSTK1	2	OTTHUMG00000152637.7	chr7	HAVANA	gene	143244093	143270854	+	0.482783	6.66557	4.31843	0.000462867	0.0268663	-0.397218
ENSG00000205426.10	protein_coding	KRT81	2	OTTHUMG00000167574.2	chr12	HAVANA	gene	52285913	52291534	-	3.81199	-0.325058	4.38505	0.000401027	0.024298	-0.408205
ENSG00000231607.10	antisense	DLEU2	2	OTTHUMG00000016927.5	chr13	HAVANA	gene	49982552	50125720	-	-0.834145	3.93294	-4.20641	0.000589471	0.0306135	-0.421245
ENSG00000118257.16	protein_coding	NRP2	2	OTTHUMG00000132893.5	chr2	HAVANA	gene	205681990	205798133	+	-0.614996	6.77159	-4.31806	0.000463244	0.0268663	-0.425687
ENSG00000075651.15	protein_coding	PLD1	1	OTTHUMG00000156947.7	chr3	HAVANA	gene	171600405	171810950	-	-0.978989	2.44861	-4.07327	0.000786375	0.0358438	-0.429007
ENSG00000166887.15	protein_coding	VPS39	2	OTTHUMG00000130467.4	chr15	HAVANA	gene	42158701	42208316	-	0.662128	5.98909	4.27322	0.000510266	0.0281523	-0.445939
ENSG00000130313.6	protein_coding	PGLS	1	OTTHUMG00000182879.2	chr19	HAVANA	gene	17511629	17521288	+	0.582389	5.5746	4.26423	0.000520264	0.0284049	-0.447849
ENSG00000187955.11	protein_coding	COL14A1	1	OTTHUMG00000149877.4	chr8	HAVANA	gene	120059780	120372036	+	-0.862242	3.52381	-4.11412	0.000719759	0.0339026	-0.458142
ENSG00000147099.19	protein_coding	HDAC8	2	OTTHUMG00000021814.4	chrX	HAVANA	gene	72329516	72573103	-	-0.61491	5.59332	-4.26766	0.000516428	0.0282991	-0.468228
ENSG00000171951.4	protein_coding	SCG2	2	OTTHUMG00000133166.4	chr2	HAVANA	gene	223596940	223602503	-	-0.956334	1.0633	-4.1408	0.000679352	0.0333084	-0.469966
ENSG00000123843.12	protein_coding	C4BPB	2	OTTHUMG00000036035.8	chr1	HAVANA	gene	207088842	207099993	+	3.10447	-0.264779	4.1883	0.000613013	0.0308681	-0.481614
ENSG00000144040.12	protein_coding	SFXN5	1	OTTHUMG00000129775.8	chr2	HAVANA	gene	72942036	73075619	-	-0.54563	4.87138	-4.21718	0.000575906	0.0303168	-0.498811
ENSG00000141376.22	protein_coding	BCAS3	1	OTTHUMG00000180064.2	chr17	HAVANA	gene	60677453	61392838	+	1.08837	3.34868	4.08797	0.000761718	0.0351248	-0.499962
ENSG00000173744.17	protein_coding	AGFG1	1	OTTHUMG00000133186.5	chr2	HAVANA	gene	227472152	227561214	+	-0.599546	6.57466	-4.28272	0.000499914	0.0278562	-0.504077
ENSG00000272405.1	antisense	RP11-284F21.10	2	OTTHUMG00000185554.1	chr1	HAVANA	gene	156641666	156644887	-	1.13664	2.74281	4.05223	0.000823068	0.0370629	-0.516366
ENSG00000117152.13	protein_coding	RGS4	2	OTTHUMG00000034417.5	chr1	HAVANA	gene	163068775	163076802	+	0.759203	1.96102	4.12433	0.000704013	0.0337405	-0.523977
ENSG00000136859.9	protein_coding	ANGPTL2	2	OTTHUMG00000020695.1	chr9	HAVANA	gene	127087332	127122883	-	-0.555221	4.06062	-4.21578	0.000577656	0.0303168	-0.537213
ENSG00000004399.12	protein_coding	PLXND1	1	OTTHUMG00000159547.15	chr3	HAVANA	gene	129555175	129606818	-	-0.792404	4.27533	-4.12553	0.000702192	0.0337405	-0.549512
ENSG00000177225.16	protein_coding	PDDC1	1	OTTHUMG00000133315.7	chr11	HAVANA	gene	767220	777488	-	0.560151	5.72548	4.21924	0.000573345	0.0303039	-0.564047
ENSG00000151876.12	protein_coding	FBXO4	1	OTTHUMG00000094799.3	chr5	HAVANA	gene	41925254	41941743	+	0.658377	4.38728	4.13129	0.000693486	0.0334512	-0.581345
ENSG00000162078.11	protein_coding	ZG16B	1	OTTHUMG00000128933.3	chr16	HAVANA	gene	2830169	2839585	+	1.41106	-0.671055	3.96572	0.000993024	0.0419293	-0.588437
ENSG00000174437.16	protein_coding	ATP2A2	1	OTTHUMG00000169327.4	chr12	HAVANA	gene	110280756	110351093	+	-0.571793	7.14117	-4.24647	0.000540595	0.0291941	-0.608988
ENSG00000067082.14	protein_coding	KLF6	2	OTTHUMG00000017567.1	chr10	HAVANA	gene	3775996	3785281	-	0.558195	6.43368	4.23161	0.000558232	0.0298102	-0.614014
ENSG00000115461.4	protein_coding	IGFBP5	2	OTTHUMG00000133058.3	chr2	HAVANA	gene	216672105	216695525	-	-2.22807	1.05557	-4.02379	0.000875441	0.0383177	-0.619098
ENSG00000174132.8	protein_coding	FAM174A	1	OTTHUMG00000128726.2	chr5	HAVANA	gene	100535305	100586741	+	-0.500542	5.63638	-4.19497	0.00060423	0.0308209	-0.625901
ENSG00000265972.5	protein_coding	TXNIP	2	OTTHUMG00000013755.6	chr1	HAVANA	gene	145992435	145996600	-	1.22127	5.72331	4.14589	0.000671909	0.0332718	-0.635045
ENSG00000080823.22	protein_coding	MOK	1	OTTHUMG00000164896.8	chr14	HAVANA	gene	102224500	102305200	-	0.780195	4.5934	4.11497	0.000718431	0.0339026	-0.642655
ENSG00000142396.10	protein_coding	ERVK3-1	2	OTTHUMG00000150367.8	chr19	HAVANA	gene	58305319	58315663	+	0.557518	5.07599	4.14193	0.000677695	0.0333084	-0.645936
ENSG00000164379.6	protein_coding	FOXQ1	2	OTTHUMG00000016160.2	chr6	HAVANA	gene	1312440	1314748	+	-1.91702	-0.171036	-3.93507	0.00106138	0.043581	-0.652888
ENSG00000132170.20	protein_coding	PPARG	1	OTTHUMG00000129764.11	chr3	HAVANA	gene	12287368	12434356	+	-0.455849	6.41094	-4.20838	0.000586965	0.0305899	-0.663693
ENSG00000131873.6	protein_coding	CHSY1	1	OTTHUMG00000149873.3	chr15	HAVANA	gene	101175723	101251932	-	-0.643617	5.14366	-4.17216	0.000634784	0.0316437	-0.664533
ENSG00000168528.11	protein_coding	SERINC2	2	OTTHUMG00000003796.2	chr1	HAVANA	gene	31409565	31434680	+	0.629253	5.0565	4.13308	0.000690809	0.0334302	-0.66661
ENSG00000157168.18	protein_coding	NRG1	2	OTTHUMG00000163918.11	chr8	HAVANA	gene	31639386	32767959	+	-0.65962	3.7233	-4.05829	0.000812331	0.0368018	-0.672487
ENSG00000051108.14	protein_coding	HERPUD1	1	OTTHUMG00000133276.9	chr16	HAVANA	gene	56932048	56944863	+	0.536908	6.53857	4.19371	0.000605872	0.0308209	-0.672695
ENSG00000197301.7	antisense	RP11-366L20.2	1	OTTHUMG00000168956.1	chr12	HAVANA	gene	65851340	65882167	-	-0.691937	2.36878	-4.09466	0.000750742	0.0348592	-0.675648
ENSG00000157064.10	protein_coding	NMNAT2	2	OTTHUMG00000035519.2	chr1	HAVANA	gene	183248237	183418602	-	2.39833	-1.34938	4.0783	0.00077785	0.035564	-0.689504
ENSG00000006757.11	protein_coding	PNPLA4	2	OTTHUMG00000021103.2	chrX	HAVANA	gene	7898247	7927739	-	0.483588	7.15163	4.19943	0.000598426	0.0308209	-0.694815
ENSG00000119912.15	protein_coding	IDE	2	OTTHUMG00000018759.4	chr10	HAVANA	gene	92451684	92574076	-	-1.15288	3.20366	-4.00888	0.000904223	0.0389166	-0.698311
ENSG00000170961.6	protein_coding	HAS2	2	OTTHUMG00000164953.2	chr8	HAVANA	gene	121612116	121641390	-	-1.27953	-1.28746	-3.92847	0.0010767	0.0438477	-0.700432
ENSG00000101850.12	protein_coding	GPR143	2	OTTHUMG00000021118.4	chrX	HAVANA	gene	9725346	9786297	-	0.614642	4.39088	4.09045	0.000757622	0.0350694	-0.705986
ENSG00000087074.7	protein_coding	PPP1R15A	2	OTTHUMG00000183330.2	chr19	HAVANA	gene	48872392	48876057	+	0.935854	4.00797	4.05533	0.000817551	0.036926	-0.70659
ENSG00000141293.15	protein_coding	SKAP1	2	OTTHUMG00000178823.2	chr17	HAVANA	gene	48133440	48430275	-	1.76833	0.0179474	3.94795	0.0010321	0.042732	-0.713419
ENSG00000119929.12	protein_coding	CUTC	2	OTTHUMG00000018889.4	chr10	HAVANA	gene	99702558	99756134	+	-0.580285	5.49893	-4.14153	0.00067828	0.0333084	-0.718807
ENSG00000176715.15	protein_coding	ACSF3	1	OTTHUMG00000138044.10	chr16	HAVANA	gene	89088375	89155846	+	0.536954	5.4574	4.13735	0.000684442	0.033332	-0.722852
ENSG00000011465.16	protein_coding	DCN	1	OTTHUMG00000169998.6	chr12	HAVANA	gene	91140484	91183123	-	-0.934577	4.04638	-4.01492	0.000892444	0.0387562	-0.724704
ENSG00000242258.1	lincRNA	RP11-511P7.2	2	OTTHUMG00000158321.1	chr7	HAVANA	gene	150433654	150448140	+	-0.90557	0.995001	-3.95098	0.00102533	0.042732	-0.727239
ENSG00000160563.13	protein_coding	MED27	2	OTTHUMG00000020833.4	chr9	HAVANA	gene	131860107	132079908	-	-0.670377	5.52094	-4.13594	0.000686543	0.033332	-0.731287
ENSG00000198856.12	protein_coding	OSTC	2	OTTHUMG00000161031.2	chr4	HAVANA	gene	108650584	108667820	+	-0.637675	7.12435	-4.18984	0.000610968	0.0308681	-0.734549
ENSG00000088826.17	protein_coding	SMOX	2	OTTHUMG00000031777.4	chr20	HAVANA	gene	4120980	4187747	+	0.909264	3.15142	4.02316	0.000876641	0.0383177	-0.760426
ENSG00000145354.10	protein_coding	CISD2	1	OTTHUMG00000161014.4	chr4	HAVANA	gene	102868974	102892807	+	-0.536283	5.44428	-4.11184	0.000723317	0.0339026	-0.771507
ENSG00000077238.13	protein_coding	IL4R	1	OTTHUMG00000097015.11	chr16	HAVANA	gene	27313668	27364778	+	-0.565888	3.76494	-4.08281	0.000770283	0.0353264	-0.802078
ENSG00000196670.13	protein_coding	ZFP62	2	OTTHUMG00000162273.4	chr5	HAVANA	gene	180847611	180861285	-	0.744059	3.56819	3.95135	0.0010245	0.042732	-0.818126
ENSG00000170955.9	protein_coding	PRKCDBP	1	OTTHUMG00000133378.3	chr11	HAVANA	gene	6318946	6320647	-	0.676288	6.52724	4.12173	0.000707989	0.0338224	-0.82026
ENSG00000178752.15	protein_coding	FAM132B	1	OTTHUMG00000152901.3	chr2	HAVANA	gene	238158982	238168900	+	1.30951	1.69185	3.85286	0.00126897	0.0478835	-0.831061
ENSG00000144810.15	protein_coding	COL8A1	2	OTTHUMG00000148669.3	chr3	HAVANA	gene	99638475	99799226	+	-1.34878	1.82921	-3.85666	0.00125852	0.0478283	-0.836477
ENSG00000177425.10	protein_coding	PAWR	1	OTTHUMG00000170080.3	chr12	HAVANA	gene	79574979	79691097	-	0.442284	7.43345	4.13608	0.000686328	0.033332	-0.843261
ENSG00000160712.12	protein_coding	IL6R	2	OTTHUMG00000036073.3	chr1	HAVANA	gene	154405193	154469450	+	-0.925917	3.13115	-3.90414	0.00113514	0.0452385	-0.85994
ENSG00000125037.12	protein_coding	EMC3	2	OTTHUMG00000128652.5	chr3	HAVANA	gene	9962537	10011116	-	-0.499637	6.33177	-4.10873	0.000728215	0.0340252	-0.860813
ENSG00000183160.8	protein_coding	TMEM119	2	OTTHUMG00000169410.3	chr12	HAVANA	gene	108589846	108598320	-	-1.10442	4.76084	-3.9715	0.000980638	0.0416422	-0.87098
ENSG00000110911.15	protein_coding	SLC11A2	1	OTTHUMG00000169493.10	chr12	HAVANA	gene	50979401	51028566	-	-0.598763	3.92421	-4.01388	0.000894474	0.0387562	-0.876039
ENSG00000131389.16	protein_coding	SLC6A6	1	OTTHUMG00000155525.6	chr3	HAVANA	gene	14402576	14489349	+	-0.617157	6.02279	-4.08687	0.000763532	0.0351248	-0.880503
ENSG00000085840.12	protein_coding	ORC1	2	OTTHUMG00000008104.4	chr1	HAVANA	gene	52372829	52404459	-	-0.545564	4.90011	-4.03562	0.000853261	0.0377931	-0.893251
ENSG00000257167.2	antisense	RP11-181C3.2	2	OTTHUMG00000170209.3	chr12	HAVANA	gene	98512973	98516422	-	-0.599313	4.27315	-4.00797	0.000906009	0.0389166	-0.898024
ENSG00000160703.15	protein_coding	NLRX1	2	OTTHUMG00000154476.5	chr11	HAVANA	gene	119166568	119184016	+	0.833693	3.33914	3.88947	0.00117192	0.0460884	-0.898899
ENSG00000154134.14	protein_coding	ROBO3	1	OTTHUMG00000165934.2	chr11	HAVANA	gene	124865386	124881470	+	1.01662	1.77061	3.82547	0.00134683	0.0493232	-0.932707
ENSG00000197467.14	protein_coding	COL13A1	1	OTTHUMG00000018394.5	chr10	HAVANA	gene	69801867	69964275	+	0.808199	0.547188	3.89349	0.00116171	0.0458075	-0.936378
ENSG00000171227.6	protein_coding	TMEM37	1	OTTHUMG00000153304.5	chr2	HAVANA	gene	119429901	119438520	+	-0.912793	2.42053	-3.83237	0.00132677	0.0488284	-0.943094
ENSG00000100439.10	protein_coding	ABHD4	1	OTTHUMG00000028686.7	chr14	HAVANA	gene	22598237	22613215	+	0.924731	6.37719	4.0281	0.0008673	0.0381331	-0.951132
ENSG00000227471.8	protein_coding	AKR1B15	2	OTTHUMG00000155376.2	chr7	HAVANA	gene	134549136	134579875	+	-0.824354	3.85241	-3.88271	0.00118926	0.0466472	-0.951215
ENSG00000237943.6	processed_transcript	RP11-5N23.2	2	OTTHUMG00000017622.4	chr10	HAVANA	gene	6580419	6616452	+	0.665954	4.42328	3.96896	0.000986072	0.041754	-0.951614
ENSG00000164695.4	protein_coding	CHMP4C	2	OTTHUMG00000164726.1	chr8	HAVANA	gene	81732434	81759515	+	1.22057	2.2525	3.77787	0.00149368	0.0521754	-0.966246
ENSG00000157514.16	protein_coding	TSC22D3	2	OTTHUMG00000022168.3	chrX	HAVANA	gene	107713221	107777342	-	0.803184	3.83328	3.87267	0.00121549	0.0471366	-0.973676
ENSG00000197632.8	protein_coding	SERPINB2	2	OTTHUMG00000060592.4	chr18	HAVANA	gene	63871692	63903890	+	-0.524355	5.24187	-4.01407	0.000894103	0.0387562	-0.985279
ENSG00000167703.14	protein_coding	SLC43A2	1	OTTHUMG00000090345.7	chr17	HAVANA	gene	1569267	1628886	-	-0.731627	3.93338	-3.91758	0.00110247	0.0446532	-0.993864
ENSG00000003137.8	protein_coding	CYP26B1	1	OTTHUMG00000129756.5	chr2	HAVANA	gene	72129238	72148038	-	-0.949232	2.98458	-3.85514	0.0012627	0.0478283	-0.996068
ENSG00000153395.9	protein_coding	LPCAT1	2	OTTHUMG00000131017.4	chr5	HAVANA	gene	1456480	1523977	-	-0.646077	5.77862	-4.03359	0.000857033	0.0377931	-1.00373
ENSG00000119681.11	protein_coding	LTBP2	1	OTTHUMG00000171476.3	chr14	HAVANA	gene	74498170	74612378	-	0.742677	2.09006	3.88021	0.00119573	0.0466555	-1.00873
ENSG00000284642.1	lincRNA	RP4-736L20.5	2	OTTHUMG00000192295.1	chr1	HAVANA	gene	10395416	10397432	+	-1.32892	1.43038	-3.74613	0.00160043	0.0547119	-1.01823
ENSG00000174718.11	protein_coding	KIAA1551	2	OTTHUMG00000128501.5	chr12	HAVANA	gene	31959370	31993107	+	-1.04187	1.07448	-3.76208	0.00154586	0.0535838	-1.02157
ENSG00000148680.15	protein_coding	HTR7	2	OTTHUMG00000018732.1	chr10	HAVANA	gene	90740823	90857698	-	-0.9176	1.64288	-3.80378	0.00141186	0.0502434	-1.02162
ENSG00000133805.15	protein_coding	AMPD3	1	OTTHUMG00000165682.5	chr11	HAVANA	gene	10308313	10507579	+	-0.79927	2.57087	-3.80652	0.00140347	0.0502434	-1.03026
ENSG00000013297.11	protein_coding	CLDN11	1	OTTHUMG00000158940.4	chr3	HAVANA	gene	170418865	170454733	+	0.557752	6.76449	4.0495	0.000827964	0.0371379	-1.03199
ENSG00000232593.7	protein_coding	RP11-258C19.5	2	OTTHUMG00000021603.3	chrX	HAVANA	gene	53094145	53170914	+	-1.11633	2.87818	-3.82235	0.00135599	0.0494998	-1.03398
ENSG00000107738.19	protein_coding	VSIR	2	OTTHUMG00000018426.4	chr10	HAVANA	gene	71747559	71773498	-	1.02139	2.73098	3.75635	0.00156525	0.0539052	-1.03805
ENSG00000267121.5	antisense	CTD-2020K17.1	2	OTTHUMG00000180195.1	chr17	HAVANA	gene	45190931	45222222	-	1.98227	0.765203	3.73155	0.00165198	0.0558341	-1.04646
ENSG00000149308.16	protein_coding	NPAT	2	OTTHUMG00000166385.3	chr11	HAVANA	gene	108157215	108222642	-	-1.19229	2.55168	-3.81403	0.00138075	0.0500731	-1.04991
ENSG00000131435.12	protein_coding	PDLIM4	1	OTTHUMG00000059645.7	chr5	HAVANA	gene	132257671	132273454	+	-0.560157	7.48817	-4.04796	0.000830723	0.0371379	-1.0518
ENSG00000166295.8	protein_coding	ANAPC16	2	OTTHUMG00000018433.3	chr10	HAVANA	gene	72216000	72235860	+	0.41006	7.22203	4.03392	0.00085641	0.0377931	-1.05226
ENSG00000131475.6	protein_coding	VPS25	2	OTTHUMG00000180649.2	chr17	HAVANA	gene	42773436	42779599	+	0.483713	5.47055	3.98313	0.000956192	0.0409541	-1.05893
ENSG00000115233.11	protein_coding	PSMD14	2	OTTHUMG00000153882.2	chr2	HAVANA	gene	161308038	161411717	+	-0.384289	7.96589	-4.04714	0.000832207	0.0371379	-1.06864
ENSG00000105974.11	protein_coding	CAV1	1	OTTHUMG00000023413.8	chr7	HAVANA	gene	116524785	116561184	+	0.413409	9.34374	4.06129	0.000807065	0.0366747	-1.0707
ENSG00000224321.1	processed_pseudogene	RP11-169K16.6	1	OTTHUMG00000003108.2	chr1	HAVANA	gene	15792796	15793285	+	1.39825	1.38548	3.73752	0.00163066	0.0554392	-1.07087
ENSG00000006282.20	protein_coding	SPATA20	2	OTTHUMG00000162162.4	chr17	HAVANA	gene	50543058	50555852	+	0.690827	5.30657	3.94864	0.00103056	0.042732	-1.07259
ENSG00000163661.3	protein_coding	PTX3	2	OTTHUMG00000158750.1	chr3	HAVANA	gene	157436789	157443628	+	-0.547492	4.72614	-4.01239	0.000897356	0.0387684	-1.09096
ENSG00000127920.5	protein_coding	GNG11	2	OTTHUMG00000023411.4	chr7	HAVANA	gene	93921699	93928610	+	0.480894	7.67062	4.04092	0.000843514	0.0375301	-1.09682
ENSG00000165507.8	protein_coding	C10orf10	2	OTTHUMG00000018063.3	chr10	HAVANA	gene	44970981	44978810	-	-1.71669	2.96333	-3.69912	0.00177268	0.0583769	-1.09984
ENSG00000181773.6	protein_coding	GPR3	2	OTTHUMG00000003397.2	chr1	HAVANA	gene	27392644	27395814	+	-1.06672	0.251022	-3.78447	0.00147242	0.0518827	-1.10068
ENSG00000170364.12	protein_coding	SETMAR	1	OTTHUMG00000090265.9	chr3	HAVANA	gene	4303304	4317567	+	-0.745626	3.0732	-3.80716	0.00140153	0.0502434	-1.10601
ENSG00000175279.21	protein_coding	CENPS	1	OTTHUMG00000059085.10	chr1	HAVANA	gene	10430443	10442809	+	-0.548489	5.81155	-3.98061	0.000961451	0.0410614	-1.10707
ENSG00000113966.9	protein_coding	ARL6	1	OTTHUMG00000159189.3	chr3	HAVANA	gene	97764521	97801242	+	-0.787366	2.45517	-3.77778	0.00149398	0.0521754	-1.11285
ENSG00000132846.5	protein_coding	ZBED3	2	OTTHUMG00000102131.5	chr5	HAVANA	gene	77072072	77087323	-	0.642835	4.0767	3.84551	0.0012894	0.0481666	-1.11633
ENSG00000197153.4	protein_coding	HIST1H3J	1	OTTHUMG00000016185.3	chr6	HAVANA	gene	27890382	27893106	-	-2.22807	-0.562251	-3.73469	0.00164075	0.0555802	-1.11663
ENSG00000136193.16	protein_coding	SCRN1	2	OTTHUMG00000097093.5	chr7	HAVANA	gene	29920103	29990289	-	0.56207	6.2026	3.97896	0.000964887	0.0410904	-1.12248
ENSG00000145779.7	protein_coding	TNFAIP8	1	OTTHUMG00000162949.7	chr5	HAVANA	gene	119268692	119399688	+	-0.734444	5.3973	-3.94221	0.00104504	0.0430286	-1.12974
ENSG00000162542.13	protein_coding	TMCO4	2	OTTHUMG00000002697.1	chr1	HAVANA	gene	19682213	19799945	-	0.596782	4.36518	3.86481	0.00123643	0.0475139	-1.13
ENSG00000178053.17	protein_coding	MLF1	1	OTTHUMG00000158775.10	chr3	HAVANA	gene	158571163	158607252	+	-0.464787	5.44034	-3.9433	0.00104258	0.0430286	-1.13094
ENSG00000198130.15	protein_coding	HIBCH	1	OTTHUMG00000132673.6	chr2	HAVANA	gene	190189735	190344193	-	-0.735614	4.25694	-3.8707	0.00122071	0.0471366	-1.13121
ENSG00000254635.5	antisense	RP11-164A7.1	1	OTTHUMG00000166235.1	chr10	HAVANA	gene	28522652	28532743	-	0.707331	3.89173	3.8356	0.00131748	0.0488284	-1.13124
ENSG00000128655.17	protein_coding	PDE11A	2	OTTHUMG00000154188.7	chr2	HAVANA	gene	177623252	178072755	-	-1.19717	1.714	-3.68573	0.00182508	0.0586638	-1.13368
ENSG00000275052.4	protein_coding	PPP4R3B	2	OTTHUMG00000129336.7	chr2	HAVANA	gene	55547292	55618880	-	-0.890451	3.69218	-3.84684	0.0012857	0.048149	-1.15458
ENSG00000132478.9	protein_coding	UNK	1	OTTHUMG00000179892.3	chr17	HAVANA	gene	75784771	75825799	+	-0.543903	5.46506	-3.93262	0.00106705	0.0436932	-1.15863
ENSG00000090339.8	protein_coding	ICAM1	2	OTTHUMG00000180403.2	chr19	HAVANA	gene	10270835	10286615	+	-1.27108	2.14084	-3.69247	0.0017985	0.0585168	-1.17293
ENSG00000111981.4	protein_coding	ULBP1	2	OTTHUMG00000015810.2	chr6	HAVANA	gene	149964007	149973710	+	3.44269	0.0271463	3.89809	0.00115018	0.0456039	-1.18874
ENSG00000253522.6	lincRNA	MIR3142HG	2	OTTHUMG00000163553.2	chr5	HAVANA	gene	160438594	160487426	+	-0.858271	0.687463	-3.83336	0.00132392	0.0488284	-1.18967
ENSG00000111799.20	protein_coding	COL12A1	1	OTTHUMG00000015051.7	chr6	HAVANA	gene	75084326	75206051	-	0.515655	6.94236	3.95009	0.00102732	0.042732	-1.19133
ENSG00000203706.8	antisense	SERTAD4-AS1	2	OTTHUMG00000036392.2	chr1	HAVANA	gene	210231456	210234047	-	0.646355	4.22461	3.90984	0.00112117	0.045165	-1.21333
ENSG00000138623.10	protein_coding	SEMA7A	2	OTTHUMG00000139000.5	chr15	HAVANA	gene	74409289	74433958	-	-0.612301	2.61015	-3.87129	0.00121914	0.0471366	-1.22116
ENSG00000137713.15	protein_coding	PPP2R1B	1	OTTHUMG00000166741.3	chr11	HAVANA	gene	111726908	111766427	-	-0.541531	4.73431	-3.85888	0.00125249	0.0478283	-1.2234
ENSG00000130813.17	protein_coding	C19orf66	2	OTTHUMG00000180393.2	chr19	HAVANA	gene	10086122	10093252	+	0.87082	3.73407	3.76748	0.00152781	0.0530855	-1.23164
ENSG00000249852.1	TEC	AC145676.2	2	OTTHUMG00000160234.1	chr7	HAVANA	gene	227554	229557	-	-2.09103	-1.54753	-3.65817	0.00193778	0.0606846	-1.23753
ENSG00000166741.7	protein_coding	NNMT	2	OTTHUMG00000168245.1	chr11	HAVANA	gene	114257787	114313285	+	-0.498628	7.15981	-3.94927	0.00102914	0.042732	-1.24307
ENSG00000214944.9	protein_coding	ARHGEF28	1	OTTHUMG00000162454.3	chr5	HAVANA	gene	73626158	73941993	+	0.580892	3.55456	3.8036	0.00141241	0.0502434	-1.25835
ENSG00000185950.8	protein_coding	IRS2	2	OTTHUMG00000017338.2	chr13	HAVANA	gene	109752698	109786568	-	0.800755	2.92098	3.75328	0.00157574	0.054116	-1.25957
ENSG00000145293.15	protein_coding	ENOPH1	2	OTTHUMG00000130295.4	chr4	HAVANA	gene	82430562	82461091	+	-0.55803	6.12671	-3.92033	0.0010959	0.044508	-1.26026
ENSG00000149380.11	protein_coding	P4HA3	1	OTTHUMG00000165254.4	chr11	HAVANA	gene	74235801	74311657	-	1.33534	1.08443	3.61291	0.00213817	0.0654139	-1.26846
ENSG00000228536.2	lincRNA	RP11-392O17.1	2	OTTHUMG00000041231.2	chr1	HAVANA	gene	219409523	219459369	-	-3.03658	-2.1012	-3.92981	0.00107357	0.0438401	-1.28277
ENSG00000118680.12	protein_coding	MYL12B	2	OTTHUMG00000131510.2	chr18	HAVANA	gene	3261909	3278284	+	0.387141	8.37598	3.95304	0.00102075	0.042732	-1.28318
ENSG00000183891.5	protein_coding	TTC32	1	OTTHUMG00000151776.2	chr2	HAVANA	gene	19896643	19901986	-	-0.634902	4.85345	-3.83868	0.0013087	0.0487653	-1.28799
[truncated: 14,493 more rows]
