# Supplementary material for: Signature-driven repurposing of Midostaurin for combination with MEK1/2 and KRASG12C inhibitors in lung cancer
Source: Nat Commun. 2023 Oct 10;14:6332. doi: 10.1038/s41467-023-41828-z (PMC10564741; doi:10.1038/s41467-023-41828-z)
Supplement: Supplementary file 4 — Supplementary Data 2 [file 41467_2023_41828_MOESM4_ESM.xlsx]

## Sheet: Sheet2
					TvsC				LvsC				CombvsC				TrvsC				TrLvsC				LvsT				CombvsT				TrvsT				TrLvsT				CombvsL				TrvsL				TrLvsM
proteins.names	Protein names	Gene names	Gene names (primary )	Mass	-log 2 C FC	FC	p-value	-log10 p-value	-log 2 C FC	FC	p-value	-log10 p-value	-log 2 C FC	FC	p-value	-log10 p-value	-log 2 C FC	FC	p-value	-log10 p-value	-log 2 C FC	FC	p-value	-log10 p-value	-log 2 C FC	FC	p-value	-log10 p-value	-log 2 C FC	FC	p-value	-log10 p-value	-log 2 C FC	FC	p-value	-log10 p-value	-log 2 C FC	FC	p-value	-log10 p-value	-log 2 C FC	FC	p-value	-log10 p-value	-log 2 C FC	FC	p-value	-log10 p-value	-log 2 C FC
A0A024R1R8	HCG2014768, isoform CRA_a	hCG_2014768	0	7,091	-0.00568738	0.996066	0.971406	0.0125991	0.0245212	1.01714	0.877215	0.0568941	0.000249143	1.00017	0.998747	0.000544459	-0.143704	0.905192	0.369989	0.431811	-0.0797144	0.946245	0.616504	0.210064	0.0302086	1.02116	0.8765	0.0572481	0.00593652	1.00412	0.975629	0.0107153	-0.138016	0.908768	0.480338	0.318453	-0.074027	0.949983	0.70376	0.152575	-0.0242721	0.983317	0.900618	0.0454595	-0.168225	0.889937	0.391095	0.407718	-0.104236
E5RIA4	Aspartyl aminopeptidase (Aspartyl aminopeptidase, isoform CRA_b)	DNPEP hCG_15581	DNPEP	51,999	0.0550755	1.03891	0.539801	0.267767	-0.150098	0.901189	0.104553	0.980665	-0.0316803	0.97828	0.72349	0.140568	-0.0107728	0.992561	0.904105	0.0437809	0.110501	1.0796	0.225118	0.647589	-0.205174	0.867434	0.0722368	1.14124	-0.0867559	0.941638	0.431788	0.364729	-0.0658483	0.955383	0.549401	0.26011	0.0554259	1.03917	0.613862	0.211929	0.118418	1.08554	0.286441	0.542965	0.139326	1.10139	0.212239	0.673175	0.2606
A0A024R4M0	Ribosomal protein S9, isoform CRA_a	RPS9 hCG_2009111	RPS9	22,591	-0.13765	0.908998	0.0316628	1.49945	-0.0635664	0.956896	0.298872	0.524515	-0.294287	0.815475	7.81025e-05	4.10734	-0.0643111	0.956402	0.293399	0.532541	-0.209996	0.864539	0.00212279	2.67309	0.074084	1.05269	0.322259	0.491795	-0.156637	0.897114	0.0442862	1.35373	0.0733392	1.05215	0.327029	0.485413	-0.072346	0.95109	0.333467	0.476947	-0.230721	0.852209	0.00489486	2.31026	-0.000744751	0.999484	0.991961	0.00350535	-0.14643
A0A024RA52	Proteasome subunit alpha type (EC 3.4.25.1)	PSMA2 hCG_19883	PSMA2	25,899	-0.0427916	0.970775	0.314368	0.502561	-0.0239771	0.983518	0.569551	0.244467	0.0147469	1.01027	0.725833	0.139163	-0.00311214	0.997845	0.940919	0.026448	-0.0673159	0.954412	0.120093	0.920483	0.0188145	1.01313	0.714924	0.14574	0.0575385	1.04069	0.27058	0.567705	0.0396795	1.02789	0.443747	0.352865	-0.0245243	0.983145	0.634404	0.197634	0.038724	1.0272	0.45464	0.342332	0.020865	1.01457	0.685551	0.16396	-0.0433388
A0A024RBT2	HCG1782202, isoform CRA_c	hCG_1782202	0	18,919	0.0750277	1.05338	0.351456	0.454129	-0.0971733	0.934863	0.230892	0.636591	-0.0413374	0.971754	0.604939	0.218289	0.00588825	1.00409	0.941063	0.0263811	-0.0707773	0.952125	0.37884	0.421544	-0.172201	0.887488	0.0889121	1.05104	-0.116365	0.922509	0.241065	0.617867	-0.0691394	0.953206	0.481176	0.317696	-0.145805	0.903875	0.14568	0.8366	0.0558359	1.03946	0.568602	0.245192	0.103062	1.07405	0.297345	0.52674	0.026396
A0A075B6F6	Minor histocompatibility antigen H13 (Fragment)	HM13	HM13	30,162	0.222156	1.16648	0.299484	0.523626	0.340422	1.26613	0.118234	0.927257	0.80456	1.74661	0.000973406	3.01171	0.143404	1.10451	0.499632	0.30135	0.328781	1.25595	0.130577	0.884133	0.118267	1.08543	0.648383	0.188168	0.582405	1.49734	0.0336635	1.47284	-0.078752	0.946876	0.761056	0.118584	0.106626	1.07671	0.680834	0.166959	0.464138	1.37949	0.0841786	1.0748	-0.197019	0.872351	0.449559	0.347214	-0.0116413
A0A087WT20	DDB1- and CUL4-associated factor 13	DCAF13	DCAF13	67,551	-0.0717733	0.951468	0.469804	0.328083	0.0864285	1.06174	0.385489	0.413988	-0.154348	0.898539	0.12872	0.890354	0.0250145	1.01749	0.799973	0.0969247	-0.0933164	0.937365	0.349515	0.456534	0.158202	1.1159	0.199741	0.699532	-0.0825745	0.944371	0.496821	0.3038	0.0967878	1.06939	0.426765	0.369811	-0.0215431	0.985178	0.858528	0.0662455	-0.240776	0.84629	0.0571328	1.24311	-0.0614139	0.958324	0.612372	0.212985	-0.179745
A0A087WTP3	Far upstream element-binding protein 2	KHSRP	KHSRP	73,028	0.0525842	1.03712	0.1934	0.713542	0.0378651	1.02659	0.344077	0.463344	0.107525	1.07738	0.0122606	1.91149	0.0146264	1.01019	0.712112	0.147452	0.0981003	1.07036	0.0207115	1.68379	-0.014719	0.989849	0.761598	0.118274	0.0549406	1.03882	0.264471	0.577621	-0.0379578	0.974033	0.436987	0.359532	0.0455162	1.03205	0.35289	0.45236	0.0696596	1.04947	0.160971	0.793252	-0.0232387	0.984021	0.632538	0.198913	0.0602352
A0A087WU65	Vacuolar protein sorting-associated protein 45	VPS45	VPS45	50,736	-0.145071	0.904335	0.28047	0.552113	0.357985	1.28163	0.0126622	1.89749	0.15601	1.1142	0.246852	0.607564	0.0774871	1.05518	0.560181	0.251671	0.187971	1.13916	0.166066	0.779719	0.503056	1.41721	0.00512476	2.29033	0.301082	1.23207	0.0747461	1.12641	0.222558	1.1668	0.179935	0.744883	0.333042	1.25967	0.0506231	1.29565	-0.201975	0.86936	0.221812	0.654015	-0.280498	0.823307	0.0951865	1.02142	-0.170014
A0A087WUK2	Heterogeneous nuclear ribonucleoprotein D-like (Heterogeneous nuclear ribonucleoprotein D-like, isoform CRA_b)	HNRNPDL HNRPDL hCG_22986	HNRNPDL	40,040	0.0436942	1.03075	0.424449	0.372175	-0.0979643	0.93435	0.0824258	1.08394	0.0598509	1.04236	0.277253	0.557124	-0.224551	0.855861	0.000446045	3.35062	-0.177679	0.884124	0.00343109	2.46457	-0.141658	0.906476	0.0431697	1.36482	0.0161566	1.01126	0.808062	0.0925556	-0.268245	0.830329	0.000568161	3.24553	-0.221374	0.857748	0.00300646	2.52195	0.157815	1.1156	0.0259456	1.58594	-0.126587	0.915996	0.0680124	1.16741	-0.0797152
A0A087WUN7	SRA stem-loop-interacting RNA-binding protein, mitochondrial	SLIRP	SLIRP	10,353	0.198636	1.14761	0.0926228	1.03328	0.169639	1.12478	0.147119	0.832331	-0.0437279	0.970145	0.701586	0.153919	0.209085	1.15595	0.0777824	1.10912	0.283944	1.21752	0.0201152	1.69647	-0.0289973	0.980101	0.83543	0.0780902	-0.242364	0.845359	0.0937716	1.02793	0.0104488	1.00727	0.9403	0.0267338	0.085308	1.06091	0.542769	0.265385	-0.213367	0.862522	0.13707	0.863056	0.0394461	1.02772	0.777584	0.109253	0.114305
A0A087WUQ6	Glutathione peroxidase	GPX1	GPX1	21,938	0.0124969	1.0087	0.884756	0.0531765	0.122119	1.08833	0.166799	0.777806	0.170599	1.12553	0.0587251	1.23118	-0.200467	0.870269	0.028794	1.5407	-0.0695193	0.952955	0.423719	0.372922	0.109622	1.07895	0.305549	0.51492	0.158102	1.11582	0.144986	0.838675	-0.212964	0.862763	0.0544219	1.26423	-0.0820162	0.944736	0.440678	0.355879	0.0484797	1.03417	0.646951	0.189129	-0.322587	0.799635	0.00569414	2.24457	-0.191639
A0A087WUT6	Eukaryotic translation initiation factor 5B	EIF5B	EIF5B	138,682	-0.144714	0.904558	0.00327498	2.48479	-0.0672358	0.954465	0.136789	0.863948	-0.143588	0.905265	0.00347673	2.45883	-0.128435	0.914823	0.00770046	2.11348	-0.141256	0.90673	0.0039339	2.40518	0.0774786	1.05517	0.160239	0.795232	0.00112627	1.00078	0.983298	0.00731478	0.0162793	1.01135	0.76247	0.117777	0.00345855	1.0024	0.948746	0.0228501	-0.0763523	0.948453	0.166107	0.779613	-0.0611993	0.958467	0.262925	0.580168	-0.07402
A0A087WVC1	ATP-dependent RNA helicase DDX50	DDX50	DDX50	82,227	-0.0531274	0.963845	0.555394	0.255399	0.00621943	1.00432	0.944723	0.0246955	-0.174268	0.886217	0.0631037	1.19995	-0.0728467	0.95076	0.420543	0.37619	-0.0310719	0.978693	0.729426	0.137019	0.0593468	1.04199	0.590406	0.228849	-0.121141	0.91946	0.277354	0.556966	-0.0197193	0.986425	0.8576	0.0667154	0.0220555	1.01541	0.840959	0.0752253	-0.180488	0.882405	0.111707	0.951918	-0.0790661	0.94667	0.474564	0.323705	-0.0372914
A0A087WVD7	Adenylate kinase isoenzyme 6	AK6	AK6	12,545	-0.0380553	0.973967	0.841742	0.0748212	0.0328815	1.02305	0.863011	0.0639835	-0.225593	0.855244	0.244448	0.611813	0.0466864	1.03289	0.806543	0.0933727	-0.0464835	0.968294	0.807366	0.0929297	0.0709368	1.0504	0.761366	0.118406	-0.187537	0.878103	0.425257	0.371348	0.0847418	1.0605	0.716899	0.144542	-0.00842817	0.994175	0.971184	0.0126985	-0.258474	0.835972	0.2752	0.560352	0.013805	1.00961	0.952819	0.0209895	-0.079365
A0A087WVM4	Monofunctional C1-tetrahydrofolate synthase, mitochondrial	MTHFD1L	MTHFD1L	99,312	0.00351448	1.00244	0.962816	0.0164567	0.0141093	1.00983	0.851595	0.0697671	0.170949	1.1258	0.0325406	1.48757	0.0601786	1.04259	0.428385	0.368166	0.0903959	1.06466	0.238754	0.62205	0.0105948	1.00737	0.908654	0.0416013	0.167435	1.12306	0.0811487	1.09072	0.0566641	1.04006	0.541305	0.266558	0.0868814	1.06207	0.352	0.453457	0.15684	1.11484	0.100775	0.996647	0.0460693	1.03245	0.618891	0.208386	0.0762866
A0A087WVQ6	Clathrin heavy chain	CLTC hCG_1818599	CLTC	192,058	-0.0390768	0.973278	0.33084	0.480382	-0.0525401	0.964237	0.195235	0.709442	-0.0325812	0.97767	0.415805	0.38111	0.0524808	1.03705	0.195719	0.708367	-0.0608094	0.958726	0.136557	0.864686	-0.0134633	0.990711	0.782088	0.106744	0.00649559	1.00451	0.89376	0.0487793	0.0915576	1.06552	0.0709838	1.14884	-0.0217326	0.985049	0.655745	0.183265	0.0199589	1.01393	0.682119	0.16614	0.105021	1.07551	0.0407414	1.38996	-0.00826927
A0A087WVR3	E3 ubiquitin-protein ligase UHRF1 (Ubiquitin-like, containing PHD and RING finger domains, 1, isoform CRA_b)	UHRF1 hCG_23497	UHRF1	91,100	-1.05343	0.481821	8.95477e-05	4.04795	-0.434025	0.740194	0.0580575	1.23614	-0.837144	0.559751	0.000930344	3.03136	-0.792003	0.577542	0.00151664	2.81912	-0.767648	0.587374	0.00197226	2.70504	0.619407	1.53624	0.0295834	1.52895	0.216289	1.16174	0.423085	0.373572	0.261429	1.19867	0.334693	0.475353	0.285784	1.21907	0.292708	0.533565	-0.403119	0.756222	0.143046	0.844524	-0.357979	0.780257	0.190926	0.719135	-0.333624
A0A087WVZ9	DNA-directed RNA polymerases I, II, and III subunit RPABC1	POLR2E	POLR2E	21,460	-0.0444296	0.969673	0.787998	0.103475	-0.113736	0.924191	0.493388	0.306811	-0.169223	0.889321	0.311592	0.506414	-0.00253753	0.998243	0.987735	0.00535956	-0.064053	0.956573	0.698534	0.155813	-0.0693068	0.953096	0.732118	0.135419	-0.124794	0.917135	0.538999	0.268412	0.041892	1.02946	0.83593	0.0778301	-0.0196235	0.98649	0.922684	0.0349472	-0.0554868	0.96227	0.783932	0.105721	0.111199	1.08013	0.583732	0.233786	0.0496834
A0A087WWJ1	DNA mismatch repair protein Msh6	MSH6	MSH6	121,116	-0.328368	0.796437	0.0010821	2.96573	-0.00627818	0.995658	0.942622	0.0256626	-0.553179	0.681517	2.81816e-06	5.55003	0.18124	1.13386	0.0481572	1.31734	-0.181821	0.881589	0.0475102	1.32321	0.32209	1.25014	0.00624978	2.20414	-0.224811	0.855707	0.0456239	1.34081	0.509609	1.42366	0.000100017	3.99993	0.146547	1.10692	0.180014	0.744695	-0.546901	0.684489	4.42725e-05	4.35387	0.187519	1.1388	0.0906302	1.04273	-0.175543
A0A087WWM0	Trafficking protein particle complex subunit	TRAPPC3	TRAPPC3	21,231	0.0998102	1.07163	0.330519	0.480804	-0.0897955	0.939656	0.380261	0.419918	0.0305844	1.02143	0.763078	0.117431	0.00344037	1.00239	0.972919	0.0119232	0.080294	1.05723	0.431812	0.364705	-0.189606	0.876845	0.13752	0.861634	-0.0692258	0.953149	0.578518	0.237683	-0.0963698	0.935384	0.440953	0.355608	-0.0195162	0.986563	0.875097	0.0579437	0.12038	1.08702	0.337766	0.471384	0.0932359	1.06676	0.455738	0.341284	0.17009
A0A087WXC5	NADH dehydrogenase [ubiquinone] 1 alpha subcomplex subunit 10, mitochondrial	NDUFA10	NDUFA10	40,837	0.0251355	1.01758	0.803545	0.09499	-0.0401791	0.972534	0.691247	0.160367	-0.0998277	0.933144	0.328659	0.483254	-0.39291	0.761592	0.000800983	3.09638	-0.060736	0.958775	0.549283	0.260204	-0.0653146	0.955737	0.598644	0.222831	-0.124963	0.917027	0.318348	0.497097	-0.418046	0.748438	0.002676	2.57251	-0.0858715	0.942215	0.490031	0.309777	-0.0596486	0.959498	0.630538	0.200289	-0.352731	0.7831	0.00905114	2.0433	-0.0205569
A0A087WXM6	60S ribosomal protein L17 (Fragment)	RPL17	RPL17	19,586	0.0372013	1.02612	0.588483	0.230266	0.0151245	1.01054	0.825369	0.083352	0.0627436	1.04445	0.364733	0.438025	-0.0820954	0.944685	0.239037	0.621534	-0.013126	0.990943	0.848118	0.0715435	-0.0220768	0.984814	0.792627	0.100931	0.0255423	1.01786	0.761068	0.118577	-0.119297	0.920636	0.16534	0.781622	-0.0503274	0.965717	0.550416	0.259309	0.0476191	1.03356	0.57189	0.242687	-0.0972199	0.934833	0.254402	0.59448	-0.0282505
A0A087WY61	Nuclear mitotic apparatus protein 1	NUMA1	NUMA1	236,162	0.0840218	1.05997	0.105149	0.978196	-0.0417625	0.971467	0.408929	0.388352	0.0852631	1.06088	0.10043	0.998135	-0.124878	0.917081	0.0202043	1.69456	-0.0528623	0.964022	0.298368	0.525248	-0.125784	0.916506	0.0511179	1.29143	0.00124125	1.00086	0.983873	0.00706117	-0.2089	0.865196	0.00254601	2.59414	-0.136884	0.909481	0.0352726	1.45256	0.127026	1.09204	0.0490713	1.30917	-0.083116	0.944017	0.185628	0.731357	-0.0110999
A0A087WY71	AP-2 complex subunit mu	AP2M1	AP2M1	49,527	0.0555601	1.03926	0.402	0.395774	-0.0194918	0.98658	0.766988	0.115211	0.116298	1.08395	0.0881714	1.05467	0.0809286	1.0577	0.226698	0.644551	-0.0135667	0.99064	0.836509	0.0775293	-0.0750519	0.949308	0.35623	0.448269	0.0607379	1.043	0.453628	0.3433	0.0253685	1.01774	0.752883	0.123273	-0.0691268	0.953215	0.394706	0.403726	0.13579	1.09869	0.102932	0.987451	0.10042	1.07209	0.220869	0.655865	0.00592511
A0A087WYN9	ATP-dependent RNA helicase DHX29 (EC 3.6.4.13) (DEAH box protein 29)	DHX29	DHX29	155,292	-0.22456	0.855856	0.0422368	1.37431	-0.00127458	0.999117	0.990299	0.00423368	-0.249175	0.841378	0.0258161	1.58811	0.0547231	1.03866	0.602897	0.219757	-0.165193	0.891809	0.126175	0.899027	0.223286	1.16739	0.0934452	1.02944	-0.0246143	0.983083	0.848032	0.0715876	0.279284	1.21359	0.0394493	1.40396	0.0593674	1.04201	0.644682	0.190654	-0.2479	0.842121	0.0646138	1.18967	0.0559977	1.03958	0.663478	0.178173	-0.163918
A0A087WZ13	Ribonucleoprotein PTB-binding 1	RAVER1	RAVER1	77,844	0.0923594	1.06611	0.63741	0.195581	-0.111267	0.925775	0.570649	0.243631	-0.239582	0.846991	0.228736	0.640666	0.138273	1.10059	0.481938	0.317009	0.200504	1.1491	0.311167	0.507007	-0.203627	0.868365	0.399124	0.398893	-0.331941	0.794467	0.175464	0.755811	0.0459141	1.03234	0.84793	0.0716402	0.108145	1.07784	0.652194	0.185623	-0.128315	0.9149	0.59319	0.226806	0.249541	1.18883	0.303603	0.517693	0.311772
A0A087WZK0	Deoxyhypusine synthase	DHPS	DHPS	41,115	-0.10503	0.929785	0.359003	0.444902	-0.0635973	0.956875	0.576045	0.239544	-0.250632	0.840528	0.036529	1.43736	0.0920699	1.0659	0.420216	0.376528	0.0170872	1.01191	0.880141	0.0554479	0.0414331	1.02914	0.76548	0.116066	-0.145601	0.904002	0.300578	0.522043	0.1971	1.14639	0.165705	0.780665	0.122118	1.08833	0.383374	0.416377	-0.187035	0.878409	0.187352	0.727341	0.155667	1.11394	0.269308	0.569751	0.0806845
A0A087WZN1	Isocitrate dehydrogenase [NAD] subunit, mitochondrial	IDH3B hCG_39616	IDH3B	42,411	0.0199036	1.01389	0.865015	0.0629762	-0.100265	0.932862	0.39597	0.402338	-0.114946	0.923417	0.331854	0.479053	-0.275986	0.825886	0.0268832	1.57052	-0.165744	0.891468	0.166983	0.777328	-0.120168	0.92008	0.405987	0.391488	-0.134849	0.910765	0.352156	0.453265	-0.29589	0.81457	0.0495211	1.30521	-0.185648	0.879254	0.204527	0.689249	-0.014681	0.989875	0.918437	0.0369506	-0.175721	0.885325	0.228817	0.640512	-0.0654798
A0A087X0A8	Collagen alpha-1(XII) chain	COL12A1	COL12A1	203,109	0.734616	1.66396	0.00128733	2.89031	0.00391285	1.00272	0.984313	0.00686672	0.682363	1.60477	0.00239071	2.62147	-0.0699824	0.95265	0.725506	0.139359	0.640868	1.55927	0.00389126	2.40991	-0.730704	0.60261	0.0065006	2.18705	-0.0522531	0.964429	0.830342	0.0807429	-0.804599	0.572521	0.00322359	2.49166	-0.0937481	0.937085	0.70104	0.154257	0.678451	1.60042	0.0105742	1.97575	-0.0738952	0.950069	0.762019	0.118034	0.636956
A0A087X0K1	Calcium-binding protein 39	CAB39	CAB39	39,453	-0.0899249	0.939572	0.137149	0.862807	-0.277334	0.825114	0.000113721	3.94416	-0.193786	0.874308	0.00326859	2.48564	-0.277695	0.824908	0.000112089	3.95044	-0.447895	0.733112	1.96278e-07	6.70713	-0.187409	0.878181	0.0158404	1.80023	-0.103861	0.930539	0.159716	0.79665	-0.187771	0.877961	0.0156662	1.80504	-0.35797	0.780262	6.2697e-05	4.20275	0.0835481	1.05962	0.253913	0.595315	-0.000361429	0.99975	0.995996	0.00174234	-0.170561
A0A087X0K9	Tight junction protein ZO-1	TJP1	TJP1	187,849	0.0102986	1.00716	0.820958	0.0856791	-0.157118	0.896815	0.00224873	2.64806	0.138943	1.1011	0.00569973	2.24415	-0.32219	0.799855	5.80528e-07	6.23618	-0.179475	0.883025	0.000703134	3.15296	-0.167417	0.890436	0.00638467	2.19486	0.128645	1.09327	0.029785	1.526	-0.332488	0.794165	6.40285e-06	5.19363	-0.189773	0.876744	0.00251513	2.59944	0.296062	1.22779	2.8156e-05	4.55043	-0.165072	0.891884	0.00703019	2.15303	-0.0223565
A0A087X0M4	Kanadaptin	SLC4A1AP	SLC4A1AP	82,890	-0.0893461	0.939949	0.302318	0.519536	0.0146861	1.01023	0.863598	0.0636884	-0.0410004	0.971981	0.632363	0.199034	-0.00726796	0.994975	0.932227	0.0304784	-0.0494172	0.966327	0.564709	0.248175	0.104032	1.07477	0.326157	0.486573	0.0483457	1.03408	0.64502	0.190427	0.0820781	1.05854	0.436435	0.36008	0.0399289	1.02806	0.703343	0.152833	-0.0556865	0.962136	0.595988	0.224763	-0.0219541	0.984898	0.833941	0.0788649	-0.0641033
A0A087X0R6	Sorting nexin-12	SNX12	SNX12	19,826	0.300558	1.23162	0.000234585	3.6297	-0.0359278	0.975404	0.599435	0.222258	0.23753	1.17897	0.00209753	2.67829	0.153563	1.11231	0.0335788	1.47393	0.182691	1.135	0.0133278	1.87524	-0.336486	0.791968	0.000576179	3.23944	-0.0630283	0.957253	0.453511	0.343412	-0.146995	0.90313	0.0897297	1.04706	-0.117867	0.921549	0.168217	0.774129	0.273457	1.2087	0.00342288	2.46561	0.189491	1.14036	0.0324058	1.48938	0.218618
A0A087X0R7	SENP3-EIF4A1 readthrough (NMD candidate) (Fragment)	SENP3-EIF4A1	SENP3-EIF4A1	61,278	-0.283286	0.821717	0.327879	0.484286	-0.303755	0.810141	0.294998	0.53018	-0.846617	0.556087	0.00709301	2.14917	-0.147529	0.902795	0.607219	0.216655	-0.357252	0.78065	0.220469	0.656653	-0.0204688	0.985912	0.953409	0.0207208	-0.563331	0.676738	0.11905	0.92427	0.135757	1.09867	0.698913	0.155577	-0.0739655	0.950023	0.832873	0.0794211	-0.542862	0.686408	0.132242	0.87863	0.156226	1.11437	0.65644	0.182805	-0.0534967
A0A087X0S5	Collagen alpha-1(VI) chain	COL6A1	COL6A1	108,339	0.0733971	1.05219	0.58639	0.231813	-0.130386	0.913587	0.337624	0.471567	0.085514	1.06107	0.526701	0.278436	-0.368019	0.774846	0.0117044	1.93165	-0.370948	0.773274	0.0111469	1.95285	-0.203783	0.868271	0.224388	0.649	0.0121168	1.00843	0.941322	0.0262617	-0.441416	0.736412	0.0132784	1.87685	-0.444345	0.734918	0.0127629	1.89405	0.2159	1.16143	0.199031	0.70108	-0.237633	0.848136	0.159257	0.7979	-0.240561
A0A087X1K9	Acyl-protein thioesterase 1	LYPLA1	LYPLA1	17,981	0.126381	1.09155	0.402982	0.394714	0.169767	1.12488	0.264591	0.577425	0.10264	1.07374	0.495717	0.304766	-0.0334654	0.977071	0.82331	0.0844365	0.0520782	1.03676	0.728466	0.137591	0.0433859	1.03053	0.813167	0.0898204	-0.0237411	0.983679	0.897047	0.0471848	-0.159846	0.89512	0.388052	0.41111	-0.0743027	0.949801	0.686059	0.163639	-0.0671269	0.954537	0.714879	0.145767	-0.203232	0.868602	0.275185	0.560375	-0.117689
A0A087X1Z3	Proteasome activator complex subunit 2	PSME2	PSME2	29,127	-0.0711643	0.95187	0.429557	0.366979	-0.0431317	0.970546	0.630392	0.200389	-0.0191828	0.986792	0.830152	0.0808424	-0.255825	0.837508	0.00885264	2.05293	-0.152052	0.89997	0.100307	0.99867	0.0280326	1.01962	0.798042	0.0979743	0.0519815	1.03669	0.635833	0.196657	-0.184661	0.879856	0.103004	0.987146	-0.0808874	0.945476	0.463001	0.334418	0.023949	1.01674	0.826918	0.0825374	-0.212693	0.862925	0.0630787	1.20012	-0.10892
A0A087X211	Protein CIP2A	CIP2A	CIP2A	102,282	-0.55323	0.681493	0.0295969	1.52875	-0.11601	0.922736	0.62872	0.201543	-0.292893	0.816264	0.229347	0.639507	-0.607664	0.656259	0.0181384	1.7414	-0.735763	0.6005	0.00543711	2.26463	0.43722	1.35399	0.146333	0.834658	0.260337	1.19776	0.378918	0.421455	-0.054434	0.962972	0.852667	0.0692206	-0.182533	0.881154	0.535257	0.271437	-0.176883	0.884612	0.54785	0.261338	-0.491654	0.711209	0.104704	0.980036	-0.619753
A0A087X271	Calponin (Fragment)	CNN2	CNN2	19,758	0.234576	1.17656	0.00353789	2.45126	0.0184323	1.01286	0.797914	0.0980438	0.335278	1.26162	0.000129316	3.88835	-0.179083	0.883264	0.0202481	1.69362	0.0169245	1.0118	0.814105	0.0893194	-0.216144	0.860864	0.0218991	1.65957	0.100702	1.0723	0.260656	0.583932	-0.413659	0.750717	0.00011926	3.9235	-0.217651	0.859964	0.0211032	1.67565	0.316846	1.2456	0.0016103	2.79309	-0.197516	0.872051	0.0343346	1.46427	-0.00150777
A0A087X2I1	26S proteasome regulatory subunit 10B	PSMC6	PSMC6	45,797	-0.0662298	0.955131	0.12642	0.898183	-0.083235	0.943939	0.0587338	1.23111	-0.149968	0.901271	0.00173196	2.76146	0.0309479	1.02168	0.464851	0.332686	-0.0464495	0.968316	0.276633	0.558096	-0.0170052	0.988282	0.741637	0.129809	-0.0837377	0.94361	0.11529	0.938209	0.0971777	1.06968	0.0704627	1.15204	0.0197804	1.01381	0.701495	0.153976	-0.0667325	0.954798	0.204374	0.689574	0.114183	1.08236	0.0361997	1.44129	0.0367856
A0A096LNV3	E3 ubiquitin-protein ligase RNF114 (Fragment)	RNF114	RNF114	20,885	0.117327	1.08472	0.271114	0.566847	-0.296969	0.81396	0.00955019	2.01999	-0.095956	0.935652	0.365691	0.436886	0.0798177	1.05688	0.450353	0.346447	0.0450792	1.03174	0.668354	0.174994	-0.414297	0.750385	0.00387403	2.41184	-0.213283	0.862572	0.1085	0.964571	-0.0375097	0.974335	0.770728	0.113099	-0.0722482	0.951155	0.575691	0.239811	0.201013	1.14951	0.129023	0.889334	0.376787	1.29845	0.00758348	2.12013	0.342049
A0A096LNZ9	Ubiquitin-like protein ISG15 (Fragment)	ISG15	ISG15	15,562	0.0621676	1.04403	0.424958	0.371654	0.14668	1.10702	0.0689468	1.16149	0.112156	1.08084	0.157233	0.803457	0.0698671	1.04962	0.370899	0.430744	0.257145	1.19511	0.003035	2.51784	0.0845128	1.06033	0.376719	0.423983	0.0499881	1.03526	0.598736	0.222765	0.00769956	1.00535	0.935179	0.0291054	0.194977	1.14471	0.0499664	1.30132	-0.0345247	0.976353	0.71578	0.14522	-0.0768132	0.94815	0.420937	0.375783	0.110464
A0A0A0MQS1	Pyrroline-5-carboxylate reductase (EC 1.5.1.2)	PYCR3	PYCR3	29,893	-0.0342187	0.976561	0.824034	0.084055	0.00743501	1.00517	0.961443	0.0170765	0.00331368	1.0023	0.98281	0.0075305	-0.0265864	0.98174	0.862803	0.0640883	0.31936	1.24778	0.0482914	1.31613	0.0416537	1.02929	0.825088	0.0834999	0.0375323	1.02636	0.842136	0.0746179	0.00763221	1.0053	0.967679	0.0142686	0.353578	1.27773	0.0717698	1.14406	-0.00412133	0.997147	0.982543	0.00764827	-0.0340214	0.976694	0.856722	0.06716	0.311925
A0A0A0MQT0	Retinol binding protein 1, cellular (Retinol-binding protein 1)	RBP1 hCG_16055	RBP1	22,310	0.860287	1.8154	1.82928e-07	6.73772	0.0144957	1.0101	0.897439	0.0469953	0.714644	1.64108	2.73472e-06	5.56309	0.191481	1.14194	0.0999784	1.00009	0.430445	1.34765	0.000930642	3.03122	-0.845791	0.556406	4.36949e-06	5.35957	-0.145643	0.903976	0.296905	0.527382	-0.668806	0.629027	8.16991e-05	4.08778	-0.429842	0.742343	0.00489303	2.31042	0.700148	1.62467	4.80445e-05	4.31836	0.176985	1.13052	0.207852	0.682246	0.41595
A0A0A0MRH8	Chromodomain-helicase-DNA-binding protein 1-like	CHD1L	CHD1L	83,720	0.175754	1.12955	0.351814	0.453687	0.147334	1.10752	0.433598	0.362913	0.185439	1.13716	0.326504	0.486111	0.326688	1.25413	0.0915823	1.03819	0.221845	1.16622	0.242889	0.614592	-0.0284199	0.980494	0.901103	0.0452258	0.00968458	1.00674	0.966216	0.0149256	0.150934	1.11029	0.511505	0.291151	0.0460905	1.03246	0.84033	0.07555	0.0381044	1.02676	0.867693	0.0616338	0.179353	1.13238	0.436348	0.360167	0.0745104
A0A0A0MRK1	G patch domain-containing protein 4	GPATCH4	GPATCH4	42,055	-0.300338	0.812062	0.156604	0.805196	-0.280067	0.823553	0.18509	0.732616	0.0225178	1.01573	0.91324	0.0394148	-0.409035	0.753127	0.058699	1.23137	-0.307012	0.808314	0.148046	0.829602	0.0202706	1.01415	0.936168	0.0286462	0.322856	1.2508	0.21113	0.67545	-0.108697	0.927425	0.668299	0.175029	-0.00667377	0.995385	0.978963	0.00923379	0.302585	1.23335	0.240107	0.619596	-0.128968	0.914486	0.611516	0.213593	-0.0269444
A0A0A0MRM9	Nucleolar and coiled-body phosphoprotein 1 (Fragment)	NOLC1	NOLC1	74,656	-0.154363	0.898529	0.0591861	1.22778	-0.0144483	0.990035	0.853383	0.0688558	-0.170275	0.888673	0.0391617	1.40714	0.172247	1.12681	0.0371657	1.42986	0.0565017	1.03994	0.472585	0.32552	0.139915	1.10184	0.154333	0.811542	-0.0159118	0.989031	0.868009	0.0614759	0.32661	1.25406	0.00248465	2.60474	0.210865	1.15738	0.0372418	1.42897	-0.155826	0.897618	0.114791	0.940094	0.186696	1.13815	0.0621494	1.20656	0.07095
A0A0A0MRN0	PRP38 pre-mRNA processing factor 38 (Yeast) domain containing B, isoform CRA_b (Pre-mRNA-splicing factor 38B)	PRPF38B hCG_39919	PRPF38B	52,487	0.15501	1.11343	0.618836	0.208424	0.151428	1.11067	0.626915	0.202791	0.467462	1.38267	0.143112	0.844323	0.404505	1.32363	0.202112	0.694409	0.139014	1.10115	0.655285	0.18357	-0.00358202	0.99752	0.992487	0.00327516	0.312451	1.24182	0.415381	0.381554	0.249495	1.18879	0.51419	0.288876	-0.0159967	0.988973	0.966458	0.0148168	0.316033	1.2449	0.410144	0.387064	0.253077	1.19175	0.508234	0.293936	-0.0124146
A0A0A0MRT6	Abl interactor 1	ABI1	ABI1	51,770	0.0658694	1.04672	0.610216	0.214517	0.00155214	1.00108	0.990384	0.00419623	0.105538	1.0759	0.416442	0.380445	-0.063581	0.956886	0.622602	0.20579	0.0175958	1.01227	0.891353	0.0499503	-0.0643172	0.956398	0.68408	0.164893	0.0396685	1.02788	0.801591	0.096047	-0.12945	0.91418	0.415757	0.381161	-0.0482735	0.967093	0.759847	0.119274	0.103986	1.07474	0.512045	0.290692	-0.0651331	0.955857	0.680309	0.167294	0.0160437
A0A0A0MSE2	Hydroxyacyl-coenzyme A dehydrogenase, mitochondrial	HADH	HADH	34,595	0.141904	1.10336	0.088444	1.05333	0.0330165	1.02315	0.681402	0.166597	0.288953	1.22175	0.00159503	2.79723	-0.0591991	0.959797	0.46375	0.333716	0.0867109	1.06195	0.286861	0.542329	-0.108888	0.927303	0.275181	0.560382	0.147049	1.1073	0.145356	0.837568	-0.201103	0.869885	0.0513548	1.28942	-0.0551931	0.962466	0.575926	0.239633	0.255936	1.19411	0.0157686	1.80221	-0.0922156	0.938081	0.35339	0.451746	0.0536944
A0A0A0MSG2	Deleted.	0	0	0	0.00660052	1.00459	0.947053	0.0236259	-0.0817473	0.944913	0.414736	0.382228	0.183902	1.13595	0.0755986	1.12149	-0.696689	0.616987	6.78484e-07	6.16846	-0.46897	0.72248	0.000112996	3.94694	-0.0883478	0.940599	0.470893	0.327078	0.177301	1.13077	0.155743	0.807592	-0.703289	0.61417	9.83511e-06	5.00722	-0.475571	0.719182	0.000772356	3.11218	0.265649	1.20218	0.0388767	1.41031	-0.614941	0.652956	5.18128e-05	4.28556	-0.387223
A0A0A0MSI8	Exocyst complex component 5	EXOC5	EXOC5	82,119	-0.00698893	0.995167	0.950349	0.0221167	-0.0273593	0.981215	0.807551	0.0928302	0.110607	1.07968	0.330216	0.481202	-0.0431863	0.970509	0.700928	0.154326	0.00313009	1.00217	0.977751	0.00977176	-0.0203704	0.98598	0.882223	0.0544218	0.117596	1.08493	0.396594	0.401654	-0.0361973	0.975222	0.792472	0.101016	0.010119	1.00704	0.941321	0.0262625	0.137966	1.10035	0.321579	0.492713	-0.0158269	0.98909	0.90835	0.041747	0.0304894
A0A0A0MSI9	Myeloid differentiation primary response protein MyD88	MYD88	MYD88	29,626	0.038835	1.02728	0.733766	0.134443	0.0985632	1.07071	0.39174	0.407002	0.0540936	1.03821	0.636137	0.196449	-0.113355	0.924436	0.326051	0.486714	-0.144728	0.90455	0.213296	0.671018	0.0597282	1.04227	0.669559	0.174211	0.0152586	1.01063	0.912998	0.03953	-0.15219	0.899883	0.282822	0.548487	-0.183563	0.880526	0.198072	0.703178	-0.0444695	0.969646	0.750441	0.124684	-0.211918	0.863389	0.139963	0.853985	-0.243291
A0A0A0MSK6	Rho GTPase-activating protein 5	ARHGAP5	ARHGAP5	171,685	-0.0738194	0.950119	0.605916	0.217588	-0.155564	0.897782	0.282399	0.549136	-0.39837	0.758715	0.0103398	1.98549	0.000406392	1.00028	0.997726	0.000988635	0.021444	1.01497	0.880502	0.0552696	-0.0817441	0.944915	0.64068	0.193359	-0.32455	0.798547	0.074451	1.12813	0.0742258	1.0528	0.671548	0.172923	0.0952634	1.06826	0.58685	0.231473	-0.242806	0.8451	0.174508	0.758185	0.15597	1.11417	0.376591	0.42413	0.177008
A0A0A0MSS8	Aldo-keto reductase family 1 member C3	AKR1C3	AKR1C3	36,867	1.53415	2.89618	7.12751e-12	11.1471	-0.0192707	0.986731	0.861537	0.0647261	0.32864	1.25583	0.00684142	2.16485	1.91746	3.77756	1.10833e-13	12.9553	1.48851	2.80598	1.23879e-11	10.907	-1.55342	0.340701	2.19296e-10	9.65897	-1.20551	0.433616	1.63822e-08	7.78563	0.383305	1.30433	0.00944481	2.02481	-0.045644	0.968857	0.73615	0.133034	0.347911	1.27272	0.0169178	1.77166	1.93673	3.82836	4.08238e-12	11.3891	1.50778
A0A0A0MSW4	Phosphatidylinositol transfer protein beta isoform	PITPNB	PITPNB	31,581	-0.0244199	0.983216	0.736172	0.13302	-0.0437636	0.970121	0.547234	0.261827	-0.00301468	0.997913	0.966775	0.0146745	-0.179255	0.883159	0.0208265	1.68138	-0.162357	0.893564	0.0342496	1.46534	-0.0193437	0.986681	0.827354	0.0823086	0.0214052	1.01495	0.809317	0.0918812	-0.154835	0.898235	0.092114	1.03567	-0.137937	0.908818	0.130708	0.883697	0.040749	1.02865	0.646602	0.189363	-0.135491	0.91036	0.137287	0.862372	-0.118594
A0A0A0MT33	SR-related and CTD-associated factor 8	SCAF8	SCAF8	148,859	-0.01639	0.988704	0.86816	0.0614002	-0.140318	0.907319	0.165415	0.781424	-0.119544	0.920478	0.234245	0.630329	-0.165297	0.891745	0.105375	0.977264	-0.149145	0.901785	0.1416	0.848936	-0.123928	0.917686	0.311593	0.506413	-0.103154	0.930995	0.397778	0.40036	-0.148907	0.901934	0.226647	0.64465	-0.132755	0.912088	0.279284	0.553954	0.0207735	1.0145	0.86361	0.0636822	-0.024979	0.982835	0.836384	0.0775944	-0.00882724
A0A0A0MT83	Isovaleryl-CoA dehydrogenase isoform 1 (Isovaleryl-CoA dehydrogenase, mitochondrial)	IVD	IVD	46,319	0.179249	1.13229	0.0474376	1.32388	0.169379	1.12457	0.0597446	1.2237	0.305534	1.23588	0.00177876	2.74988	-0.244135	0.844322	0.0093075	2.03117	0.0135218	1.00942	0.875039	0.0579724	-0.00987035	0.993182	0.92531	0.033713	0.126285	1.09148	0.238591	0.622347	-0.423384	0.745674	0.000588179	3.23049	-0.165727	0.891479	0.126541	0.897768	0.136155	1.09897	0.20512	0.687993	-0.413513	0.750793	0.000734829	3.13381	-0.155857
A0A0A0MTB8	WD repeat-containing protein 36	WDR36	WDR36	99,366	-0.17851	0.883615	0.083348	1.0791	0.0484828	1.03418	0.626061	0.203383	-0.21434	0.86194	0.040655	1.39089	-0.0272796	0.981269	0.783516	0.105952	0.115522	1.08337	0.252105	0.598418	0.226992	1.17039	0.073007	1.13664	-0.0358303	0.97547	0.768303	0.114467	0.15123	1.11052	0.221968	0.653709	0.294032	1.22606	0.0235336	1.62831	-0.262823	0.833456	0.040441	1.39318	-0.0757624	0.948841	0.53489	0.271735	0.0670391
A0A0A0MTC1	E3 ubiquitin-protein ligase RNF213	RNF213	RNF213	596,487	0.0383767	1.02696	0.725568	0.139322	-0.0149575	0.989686	0.891034	0.0501059	0.110363	1.0795	0.318131	0.497395	0.232474	1.17485	0.0433292	1.36322	0.133184	1.09671	0.23092	0.636538	-0.0533342	0.963707	0.690525	0.160821	0.0719861	1.05116	0.591614	0.227962	0.194097	1.14401	0.157021	0.804042	0.0948072	1.06792	0.480993	0.317861	0.12532	1.09075	0.353819	0.451219	0.247431	1.18709	0.0755328	1.12186	0.148141
A0A0A0MTH3	Integrin-linked protein kinase	ILK	ILK	54,612	-0.0430463	0.970603	0.395935	0.402376	-0.0500858	0.965879	0.324824	0.488352	-0.0932414	0.937414	0.0748202	1.12598	-0.103437	0.930813	0.0500773	1.30036	-0.167571	0.89034	0.00297831	2.52603	-0.00703949	0.995132	0.908942	0.041464	-0.050195	0.965806	0.418563	0.378239	-0.0603908	0.959004	0.332205	0.478594	-0.124525	0.917306	0.0537449	1.26966	-0.0431555	0.97053	0.485823	0.313522	-0.0533514	0.963695	0.390412	0.408477	-0.117485
A0A0A0MTH9	TATA-binding protein-associated factor 172	BTAF1	BTAF1	206,933	0.288728	1.22156	0.195818	0.708147	0.220457	1.1651	0.319082	0.496097	0.139314	1.10138	0.525831	0.279153	0.192865	1.14303	0.382014	0.417921	0.193164	1.14327	0.381291	0.418744	-0.0682713	0.95378	0.798782	0.0975718	-0.149414	0.901617	0.578088	0.238006	-0.0958636	0.935712	0.720593	0.14231	-0.0955646	0.935906	0.721425	0.141809	-0.0811427	0.945309	0.76198	0.118057	-0.0275922	0.981056	0.917884	0.0372124	-0.0272933
A0A0A0MTN0	Cullin-2	CUL2	CUL2	88,506	0.106392	1.07653	0.016523	1.78191	0.0991675	1.07116	0.024186	1.61644	0.0858065	1.06128	0.0476563	1.32188	0.205183	1.15283	6.11022e-05	4.21394	0.194781	1.14455	0.000110373	3.95714	-0.00722406	0.995005	0.886167	0.0524846	-0.0205851	0.985833	0.683879	0.165021	0.0987909	1.07088	0.0612207	1.2131	0.0883893	1.06318	0.091208	1.03997	-0.0133611	0.990782	0.791314	0.101651	0.106015	1.07625	0.0459129	1.33806	0.0956134
A0A0A0MTS2	Deleted.	0	0	0	-0.0308811	0.978822	0.501649	0.2996	-0.174899	0.88583	0.000933126	3.03006	0.0167659	1.01169	0.714171	0.146198	-0.196578	0.872618	0.000302637	3.51908	-0.174895	0.885832	0.000933303	3.02998	-0.144018	0.904995	0.0168764	1.77272	0.047647	1.03358	0.398867	0.399171	-0.165697	0.891498	0.00708183	2.14985	-0.144014	0.904998	0.0168788	1.77266	0.191665	1.14208	0.00241522	2.61704	-0.0216788	0.985086	0.699049	0.155492	3.64927e-06
A0A0A6YYH1	Protein C15orf38-AP3S2	C15orf38-AP3S2	C15orf38-AP3S2	43,882	-0.117726	0.921639	0.411675	0.385445	-0.192277	0.875223	0.186005	0.730475	0.221978	1.16633	0.129519	0.887668	-0.713872	0.609681	5.56857e-05	4.25426	-0.467233	0.723351	0.00333774	2.47655	-0.0745511	0.949638	0.669277	0.174394	0.339704	1.2655	0.0621197	1.20677	-0.596147	0.661518	0.00242075	2.61605	-0.349507	0.784852	0.0555408	1.25539	0.414255	1.33261	0.0257072	1.58995	-0.521596	0.696601	0.00653909	2.18448	-0.274956
A0A0B4J1Z1	Serine/arginine-rich-splicing factor 7 (Splicing factor, arginine/serine-rich 7, 35kDa, isoform CRA_a)	SRSF7 SFRS7 hCG_15878	SRSF7	15,763	0.100192	1.07192	0.0125434	1.90158	0.0342007	1.02399	0.360529	0.44306	0.0684558	1.04859	0.0756888	1.12097	0.0557248	1.03938	0.142932	0.844871	0.0641758	1.04549	0.0943386	1.02531	-0.0659917	0.955288	0.155916	0.807108	-0.0317366	0.978242	0.486495	0.312922	-0.0444676	0.969648	0.332345	0.478411	-0.0360165	0.975344	0.430485	0.366042	0.034255	1.02403	0.453035	0.343868	0.0215241	1.01503	0.635838	0.196654	0.0299751
A0A0B4J269	G_PROTEIN_RECEP_F1_2 domain-containing protein	0	0	88,382	0.217463	1.16269	0.111896	0.951186	-0.345464	0.787055	0.0156124	1.80653	-0.186729	0.878595	0.168741	0.772779	-0.145623	0.903989	0.278688	0.554881	-0.117177	0.92199	0.380921	0.419165	-0.562927	0.676927	0.00216725	2.66409	-0.404192	0.755659	0.0201511	1.6957	-0.363086	0.7775	0.0345923	1.46102	-0.33464	0.792982	0.0496205	1.30434	0.158735	1.11631	0.333509	0.476893	0.199841	1.14857	0.226543	0.644849	0.228287
A0A0B4J287	COMM domain-containing protein 4	COMMD4	COMMD4	19,382	-0.139331	0.90794	0.297408	0.526647	-0.104192	0.930326	0.433085	0.363427	-0.134953	0.910699	0.31244	0.505234	-0.103649	0.930676	0.435452	0.36106	-0.241406	0.84592	0.0785425	1.1049	0.0351382	1.02465	0.827879	0.082033	0.00437733	1.00304	0.978379	0.00949291	0.0356818	1.02504	0.825262	0.0834079	-0.102076	0.931692	0.529468	0.27616	-0.0307609	0.978904	0.849024	0.0710799	0.000543586	1.00038	0.997315	0.00116778	-0.137214
A0A0C4DG68	Pumilio homolog 2 (Fragment)	PUM2	PUM2	94,070	-0.0940504	0.936889	0.6327	0.198802	0.171873	1.12652	0.385622	0.413839	-0.151543	0.900287	0.443335	0.353268	0.410113	1.32879	0.0469823	1.32807	0.080744	1.05756	0.681349	0.166631	0.265923	1.20241	0.275743	0.559495	-0.0574922	0.960933	0.811057	0.0909486	0.504163	1.4183	0.0462402	1.33498	0.174794	1.1288	0.469961	0.327938	-0.323415	0.799176	0.188061	0.725701	0.23824	1.17955	0.327417	0.484899	-0.0911288
A0A0C4DG89	Probable ATP-dependent RNA helicase DDX46	DDX46	DDX46	117,461	-0.073877	0.950081	0.189875	0.721531	-0.0919527	0.938252	0.106702	0.971826	-0.226577	0.85466	0.000477114	3.32138	0.0947893	1.06791	0.0969787	1.01332	-0.0342233	0.976557	0.536729	0.270245	-0.0180758	0.987549	0.789112	0.102861	-0.152701	0.899565	0.0329664	1.48193	0.168666	1.12402	0.0198894	1.70138	0.0396537	1.02787	0.558725	0.252802	-0.134625	0.910907	0.0570375	1.24384	0.186742	1.13819	0.0110077	1.9583	0.0577295
A0A0C4DGA2	Enoyl-CoA delta isomerase 2, mitochondrial (Testicular secretory protein Li 33)	ECI2	ECI2	40,183	0.187921	1.13912	0.243819	0.612933	0.183561	1.13568	0.254563	0.594205	-0.0887831	0.940316	0.576812	0.238966	0.276436	1.2112	0.0925239	1.03375	0.332978	1.25961	0.0459289	1.33791	-0.00435952	0.996983	0.982079	0.0078534	-0.276704	0.825475	0.164263	0.784462	0.0885153	1.06328	0.6492	0.187621	0.145057	1.10577	0.457975	0.339158	-0.272344	0.827973	0.170693	0.767785	0.0928748	1.06649	0.633255	0.198422	0.149417
A0A0C4DGB1	rRNA adenine N(6)-methyltransferase (EC 2.1.1.-)	DIMT1	DIMT1	30,844	-0.615931	0.652509	6.87864e-05	4.1625	-0.250495	0.840608	0.0557618	1.25366	-0.372656	0.772359	0.00672707	2.17217	-0.19117	0.875895	0.136871	0.863689	-0.445479	0.73434	0.00173149	2.76158	0.365436	1.28827	0.025192	1.59874	0.243275	1.18368	0.122998	0.910102	0.424761	1.34235	0.0107518	1.96852	0.170452	1.12541	0.272601	0.564472	-0.12216	0.918811	0.428314	0.368238	0.0593252	1.04198	0.698753	0.155677	-0.194984
A0A0C4DGG8	Cell division cycle and apoptosis regulator protein 1 (Fragment)	CCAR1	CCAR1	120,425	0.0833084	1.05944	0.223918	0.649911	0.162996	1.11961	0.0232994	1.63266	0.12852	1.09317	0.0670616	1.17353	0.103405	1.07431	0.134932	0.869886	0.232475	1.17485	0.00223028	2.65164	0.079688	1.05679	0.338703	0.470181	0.045212	1.03183	0.584315	0.233353	0.0200963	1.01403	0.807294	0.0929684	0.149166	1.10893	0.0814055	1.08935	-0.034476	0.976386	0.676063	0.170013	-0.0595917	0.959536	0.472079	0.325985	0.0694784
A0A0D9SEI3	Cyclin-dependent kinase 11B	CDK11B	CDK11B	89,438	-0.167258	0.890534	0.0596541	1.22436	0.0890511	1.06367	0.300522	0.522124	-0.0736891	0.950205	0.389595	0.409387	-0.0208856	0.985627	0.805708	0.0938225	-0.0753736	0.949096	0.379053	0.4213	0.256309	1.19442	0.0212954	1.67171	0.0935691	1.06701	0.372729	0.428606	0.146373	1.10678	0.16915	0.771728	0.0918846	1.06576	0.381228	0.418815	-0.16274	0.893327	0.128409	0.891403	-0.109937	0.926629	0.296778	0.527568	-0.164425
A0A0D9SFE4	Dynamin-1	DNM1	DNM1	97,238	0.0594899	1.0421	0.535976	0.270854	0.0731824	1.05203	0.447563	0.349146	0.051086	1.03604	0.59462	0.225761	-0.0106837	0.992622	0.911082	0.0404423	0.0722316	1.05134	0.453401	0.343517	0.0136925	1.00954	0.906973	0.0424058	-0.0084039	0.994192	0.942816	0.0255728	-0.0701736	0.952523	0.550976	0.258867	0.0127417	1.00887	0.913404	0.0393369	-0.0220964	0.984801	0.850463	0.0703448	-0.0838661	0.943526	0.476906	0.321567	-0.000950843
A0A0D9SG12	ATP-dependent RNA helicase DDX3X	DDX3X	DDX3X	71,541	-0.111153	0.925848	0.0329785	1.48177	-0.167179	0.890582	0.00255105	2.59328	-0.306385	0.808665	3.57588e-06	5.44662	-0.0929758	0.937587	0.0697891	1.15621	-0.233496	0.850571	0.00010487	3.97935	-0.056026	0.96191	0.357219	0.447065	-0.195232	0.873432	0.00369111	2.43284	0.0181773	1.01268	0.762958	0.1175	-0.122343	0.918694	0.0528101	1.27728	-0.139206	0.908019	0.0296171	1.52846	0.0742032	1.05278	0.226353	0.645214	-0.0663174
A0A0D9SG77	Ubiquitin-protein ligase E3A	UBE3A	UBE3A	88,083	-0.198874	0.87123	0.169966	0.769637	-0.152613	0.89962	0.287639	0.541153	-0.0865194	0.941792	0.542729	0.265417	-0.192594	0.875031	0.183224	0.737017	-0.14542	0.904116	0.310337	0.508166	0.0462611	1.03259	0.789661	0.102559	0.112355	1.08099	0.518911	0.284907	0.0062801	1.00436	0.971088	0.0127416	0.0534541	1.03775	0.75798	0.120342	0.0660934	1.04688	0.703388	0.152805	-0.039981	0.972668	0.817633	0.0874417	0.00719306
A0A0D9SGF6	Spectrin alpha chain, non-erythrocytic 1	SPTAN1	SPTAN1	287,605	0.140654	1.1024	0.000375847	3.42499	0.0740931	1.0527	0.0361143	1.44232	0.29193	1.22428	2.25552e-08	7.64675	-0.068068	0.953915	0.0522536	1.28188	0.113453	1.08181	0.00258165	2.5881	-0.066561	0.954912	0.115055	0.939094	0.151276	1.11055	0.00126949	2.89637	-0.208722	0.865303	4.61915e-05	4.33544	-0.0272011	0.981322	0.508523	0.293689	0.217837	1.16299	2.76057e-05	4.559	-0.142161	0.906161	0.00214732	2.6681	0.0393599
A0A0G2JIW1	Heat shock 70 kDa protein 1B	HSPA1B	HSPA1B	70,109	0.190916	1.14149	2.35944e-06	5.62719	-0.0739205	0.950053	0.0203563	1.6913	0.216383	1.16182	3.87236e-07	6.41202	-0.0360134	0.975346	0.234008	0.63077	0.0569668	1.04028	0.0664206	1.1777	-0.264837	0.832293	3.91133e-07	6.40768	0.0254672	1.01781	0.486808	0.312642	-0.22693	0.854451	3.56528e-06	5.44791	-0.133949	0.911333	0.00132227	2.87868	0.290304	1.2229	9.63469e-08	7.01616	0.0379071	1.02662	0.304165	0.516891	0.130887
A0A0G2JMS5	39S ribosomal protein L45, mitochondrial	MRPL45	MRPL45	29,408	-0.20426	0.867984	0.0039218	2.40651	0.180549	1.13332	0.00923783	2.03443	-0.0297811	0.979569	0.639975	0.193837	0.0792873	1.0565	0.220558	0.656477	0.0347329	1.02437	0.585778	0.232267	0.384809	1.30569	6.59522e-05	4.18077	0.174479	1.12856	0.0342221	1.46569	0.283548	1.21718	0.00143251	2.8439	0.238993	1.18017	0.0054682	2.26216	-0.21033	0.864339	0.012616	1.89908	-0.101262	0.932217	0.202168	0.694288	-0.145816
A0A0G2JNZ5	Glucosylceramidase (EC 3.2.1.45)	GBA	GBA	50,263	0.239321	1.18044	0.443148	0.353451	0.229267	1.17224	0.462268	0.335106	0.271159	1.20678	0.385888	0.413539	0.224189	1.16812	0.47211	0.325957	-0.0839209	0.94349	0.786633	0.104228	-0.0100543	0.993055	0.978856	0.00928127	0.0318381	1.02231	0.933121	0.0300621	-0.0151319	0.989566	0.968183	0.0140426	-0.323242	0.799272	0.398453	0.399623	0.0418924	1.02946	0.912082	0.0399662	-0.00507755	0.996487	0.989321	0.0046628	-0.313187
A0A0G2JQ41	Active breakpoint cluster region-related protein (Fragment)	ABR	ABR	88,858	-0.21525	0.861397	0.00451358	2.34548	-0.117825	0.921576	0.0954644	1.02016	-0.00166919	0.998844	0.980473	0.00856458	-0.166108	0.891244	0.0227566	1.64289	-0.229338	0.853026	0.00278996	2.5544	0.0974246	1.06986	0.251358	0.599707	0.213581	1.15956	0.0174788	1.75749	0.0491421	1.03465	0.557997	0.253368	-0.014088	0.990282	0.8661	0.0624318	0.116156	1.08384	0.174359	0.758555	-0.0482824	0.967087	0.564847	0.248069	-0.111513
A0A0J9YWJ4	RNA polymerase II subunit A C-terminal domain phosphatase (EC 3.1.3.16) (Fragment)	CTDP1	CTDP1	80,499	0.12147	1.08784	0.190168	0.720863	0.125358	1.09078	0.176964	0.752115	0.266263	1.20269	0.00750046	2.12491	-0.0939675	0.936943	0.306673	0.513324	0.108647	1.07822	0.239282	0.62109	0.00388792	1.0027	0.972083	0.0122966	0.144793	1.10557	0.201783	0.695115	-0.215437	0.861285	0.0635623	1.1968	-0.012823	0.991151	0.908125	0.0418545	0.140905	1.1026	0.21367	0.670257	-0.219325	0.858967	0.0593092	1.22688	-0.016711
A0A0J9YX62	DnaJ homolog subfamily B member 6	DNAJB6	DNAJB6	36,658	-0.134943	0.910706	0.410385	0.386809	-0.186139	0.878955	0.259757	0.585432	-0.347978	0.785684	0.0423226	1.37343	-0.363891	0.777066	0.0345509	1.46154	-0.578019	0.669883	0.00176968	2.7521	-0.0511953	0.965136	0.797182	0.0984423	-0.213035	0.86272	0.291318	0.535633	-0.228948	0.853257	0.257789	0.588736	-0.443076	0.735565	0.0355053	1.44971	-0.16184	0.893884	0.420009	0.376741	-0.177752	0.884079	0.376583	0.424139	-0.391881
A0A0J9YYL3	Poly(U)-binding-splicing factor PUF60 (Fragment)	PUF60	PUF60	54,626	0.0440676	1.03102	0.384344	0.41528	-0.0192574	0.98674	0.701634	0.153889	0.017929	1.01251	0.721259	0.141909	0.0755155	1.05374	0.143083	0.844412	0.0649629	1.04606	0.204625	0.689042	-0.0633251	0.957056	0.309122	0.50987	-0.0261386	0.982045	0.671268	0.173104	0.0314478	1.02204	0.609985	0.214681	0.0208952	1.01459	0.734194	0.134189	0.0371865	1.02611	0.546914	0.262081	0.0947729	1.0679	0.133969	0.872997	0.0842203
A0A0M3HER2	Centromere protein V	CENPV	CENPV	18,807	0.0554285	1.03917	0.784199	0.105574	-0.158917	0.895697	0.435481	0.361031	-0.133952	0.911331	0.510027	0.292407	-0.20823	0.865599	0.309482	0.509364	-0.161442	0.894131	0.428336	0.368215	-0.214346	0.861937	0.391202	0.407599	-0.189381	0.876982	0.447787	0.348929	-0.263658	0.832973	0.293824	0.531913	-0.21687	0.86043	0.38575	0.413694	0.024965	1.01746	0.919716	0.0363465	-0.0493123	0.966397	0.842251	0.0745587	-0.0025247
A0A0S2Z4G6	Tropomyosin 1 (Alpha), isoform CRA_o (Tropomyosin 1 isoform 2) (Tropomyosin alpha-1 chain) (Fragment)	TPM1 hCG_33495	TPM1	32,727	0.63956	1.55785	0.000138329	3.85909	0.135959	1.09882	0.330536	0.480781	0.834254	1.78294	5.43942e-06	5.26445	-0.444478	0.73485	0.00389786	2.40917	-0.0344981	0.976371	0.802825	0.0953789	-0.503601	0.705344	0.0067973	2.16766	0.194694	1.14448	0.257296	0.589567	-1.08404	0.471706	2.42497e-06	5.61529	-0.674059	0.626741	0.000639287	3.1943	0.698295	1.62259	0.00045485	3.34213	-0.580438	0.668761	0.00236802	2.62562	-0.170458
A0A140T8Z0	Protein diaphanous homolog 1	DIAPH1	DIAPH1	140,300	-0.261196	0.834396	0.00024296	3.61447	-0.184265	0.880097	0.00514103	2.28895	-0.405209	0.755127	1.01696e-06	5.9927	-0.0487643	0.966764	0.415914	0.380997	-0.348053	0.785644	8.25807e-06	5.08312	0.0769304	1.05477	0.297298	0.526808	-0.144013	0.904998	0.0588332	1.23038	0.212432	1.15864	0.00780085	2.10786	-0.0868574	0.941572	0.241037	0.617916	-0.220944	0.858004	0.00597116	2.22394	0.135501	1.09847	0.0740108	1.13071	-0.163788
A0A1B0GTG2	Alpha-aminoadipic semialdehyde dehydrogenase	ALDH7A1	ALDH7A1	58,140	0.0010605	1.00074	0.982678	0.00758889	0.0303655	1.02127	0.536134	0.270727	0.00979505	1.00681	0.84114	0.0751318	-0.0620694	0.957889	0.212821	0.671986	-0.0406434	0.972221	0.409407	0.387845	0.029305	1.02052	0.62527	0.203932	0.00873455	1.00607	0.883944	0.0535752	-0.0631299	0.957185	0.297947	0.52586	-0.0417039	0.971507	0.488372	0.311249	-0.0205705	0.985843	0.731334	0.135884	-0.0924349	0.937938	0.133291	0.875198	-0.0710089
A0A1B0GUI1	Ral GTPase-activating protein subunit alpha-1	RALGAPA1	RALGAPA1	280,412	1.52669	2.88124	2.1784e-11	10.6619	-0.0264681	0.981821	0.820909	0.0857048	1.73695	3.3333	2.03915e-12	11.6906	-0.137852	0.908871	0.246161	0.608781	0.852306	1.80538	3.76784e-07	6.42391	-1.55316	0.340763	5.89899e-10	9.22922	0.21026	1.1569	0.152352	0.817151	-1.66454	0.315444	1.75099e-10	9.75672	-0.674387	0.626599	0.000114633	3.94069	1.76342	3.39502	6.26597e-11	10.203	-0.111384	0.9257	0.439846	0.3567	0.878774
A0A1B0GV98	Alpha-ketoglutarate-dependent dioxygenase FTO	FTO	FTO	52,501	-0.019255	0.986742	0.895536	0.0479168	0.0665323	1.0472	0.650828	0.186534	-0.121036	0.919527	0.413054	0.383993	0.212632	1.1588	0.157453	0.80285	0.0665844	1.04723	0.650574	0.186703	0.0857874	1.06127	0.633807	0.198043	-0.10178	0.931882	0.572396	0.242303	0.231887	1.17437	0.205779	0.686599	0.0858394	1.06131	0.633602	0.198183	-0.187568	0.878085	0.302761	0.5189	0.1461	1.10657	0.419712	0.377049	5.2052e-05
A0A1B0GVN9	Uroporphyrinogen decarboxylase (EC 4.1.1.37)	UROD	UROD	33,175	0.0606898	1.04296	0.392495	0.406166	0.0612333	1.04336	0.388348	0.410779	0.227397	1.17072	0.00377061	2.42359	-0.189845	0.8767	0.0127533	1.89438	-0.107597	0.928133	0.136894	0.863617	0.000543448	1.00038	0.994965	0.00219215	0.166707	1.12249	0.0639972	1.19384	-0.250535	0.840585	0.00796164	2.099	-0.168287	0.889899	0.0617213	1.20956	0.166164	1.12207	0.0647972	1.18844	-0.251078	0.840268	0.00784821	2.10523	-0.16883
A0A1B0GW44	Cathepsin D	CTSD	CTSD	43,688	1.06873	2.09758	2.00728e-15	14.6974	0.164786	1.121	0.00322846	2.491	0.616888	1.53356	5.9706e-11	10.224	0.872128	1.83036	9.8699e-14	13.0057	0.844987	1.79625	1.7956e-13	12.7458	-0.903943	0.534424	2.26113e-12	11.6457	-0.45184	0.73111	3.10383e-07	6.5081	-0.1966	0.872604	0.0039385	2.40467	-0.223742	0.856342	0.0013899	2.85702	0.452102	1.36803	3.07686e-07	6.51189	0.707342	1.63279	1.9301e-10	9.71442	0.680201
A0A1B0GWJ0	Adenylosuccinate lyase (ASL) (EC 4.3.2.2) (Adenylosuccinase)	ADSL	ADSL	54,466	-0.151057	0.90059	0.0640131	1.19373	-0.0429806	0.970648	0.583249	0.234146	-0.17668	0.884736	0.0327993	1.48414	0.150368	1.10985	0.0651358	1.18618	0.0284284	1.0199	0.716107	0.145022	0.108077	1.07779	0.265694	0.575618	-0.0256233	0.982396	0.788824	0.10302	0.301425	1.23236	0.0045423	2.34272	0.179486	1.13248	0.0716747	1.14463	-0.1337	0.911491	0.171978	0.764527	0.193348	1.14341	0.0538144	1.2691	0.071409
A0A1C7CYX9	Dihydropyrimidinase-related protein 2	DPYSL2	DPYSL2	73,503	-0.206915	0.866388	0.00288276	2.54019	-0.0271593	0.981351	0.661017	0.179787	-0.0335113	0.977039	0.588933	0.229934	-0.353106	0.782897	1.13257e-05	4.94594	-0.372828	0.772267	5.54479e-06	5.25611	0.179756	1.13269	0.0258975	1.58674	0.173404	1.12772	0.0309479	1.50937	-0.14619	0.903634	0.0644794	1.19058	-0.165913	0.891364	0.0380653	1.41947	-0.006352	0.995607	0.933108	0.0300683	-0.325946	0.797775	0.000298501	3.52505	-0.345669
A0A1W2PPH1	Malic enzyme	ME2	ME2	61,222	-0.0215168	0.985196	0.814026	0.0893616	-0.0407718	0.972135	0.656365	0.182855	0.00479363	1.00333	0.958177	0.0185545	-0.250458	0.84063	0.0116576	1.93339	-0.0866633	0.941698	0.348462	0.457845	-0.0192551	0.986742	0.863488	0.0637438	0.0263104	1.0184	0.814318	0.089206	-0.228941	0.853261	0.0514673	1.28847	-0.0651466	0.955848	0.562278	0.250049	0.0455655	1.03209	0.684615	0.164553	-0.209686	0.864725	0.0723451	1.14059	-0.0458915
A0A1W2PPZ5	Transcription elongation factor A protein 1	TCEA1	TCEA1	33,936	-0.119714	0.92037	0.279938	0.552938	-0.169796	0.888968	0.130876	0.883141	-0.114426	0.92375	0.301119	0.521262	-0.0972529	0.934811	0.377712	0.42284	-0.189711	0.876781	0.0936721	1.02839	-0.0500826	0.965881	0.708453	0.149689	0.00528721	1.00367	0.968455	0.0139203	0.0224607	1.01569	0.866633	0.0621648	-0.0699975	0.95264	0.601846	0.220515	0.0553698	1.03913	0.679425	0.167859	0.0725432	1.05157	0.588793	0.230037	-0.0199149
A0A1W2PRB8	DUF1907 domain-containing protein	0	0	93,445	-0.0490913	0.966545	0.598806	0.222714	0.409314	1.32805	0.000238516	3.62248	0.22876	1.17183	0.0215838	1.66587	0.0693996	1.04928	0.458577	0.338587	0.286635	1.21979	0.00535071	2.27159	0.458406	1.37402	0.000583035	3.23431	0.277851	1.21239	0.0225551	1.64676	0.118491	1.0856	0.304593	0.51628	0.335726	1.26201	0.0072852	2.13756	-0.180555	0.882364	0.124001	0.906576	-0.339915	0.790088	0.00669811	2.17405	-0.12268
A0A1W2PS02	Chromosome 13 open reading frame 12, isoform CRA_a (Proteasome maturation protein)	POMP C13orf12 hCG_30945	POMP	9,053	-0.535361	0.689986	2.68603e-05	4.57089	-0.444293	0.734945	0.000224164	3.64943	-0.394505	0.760751	0.000727637	3.13809	-0.770266	0.586309	1.73682e-07	6.76025	-0.759441	0.590725	2.15574e-07	6.6664	0.0910687	1.06516	0.461702	0.335638	0.140857	1.10256	0.259372	0.586076	-0.234905	0.849741	0.0670944	1.17331	-0.22408	0.856141	0.0795963	1.09911	0.0497879	1.03511	0.685961	0.163701	-0.325973	0.79776	0.0141579	1.849	-0.315149
A0A1X7SBZ2	Probable ATP-dependent RNA helicase DDX17	DDX17	DDX17	80,254	0.163777	1.12022	0.00230395	2.63753	0.134736	1.09789	0.00944346	2.02487	0.273057	1.20837	1.06359e-05	4.97323	0.052744	1.03724	0.27458	0.561331	0.163557	1.12005	0.00232918	2.6328	-0.0290411	0.980071	0.619082	0.208252	0.109279	1.07869	0.0718472	1.14359	-0.111033	0.925925	0.067748	1.1691	-0.000220539	0.999847	0.996978	0.00131433	0.13832	1.10062	0.0259075	1.58657	-0.0819922	0.944752	0.169304	0.771332	0.0288206
A0A286YEX4	Nuclear factor 1	NFIC	NFIC	58,204	0.0784825	1.05591	0.57359	0.241398	0.00378041	1.00262	0.978287	0.00953387	0.247626	1.18725	0.0860475	1.06526	-0.332506	0.794156	0.0248991	1.60382	-0.186525	0.87872	0.188972	0.723604	-0.0747021	0.949538	0.661342	0.179574	0.169144	1.12439	0.326021	0.486754	-0.410989	0.752108	0.0237479	1.62438	-0.265008	0.832194	0.130318	0.884994	0.243846	1.18414	0.162097	0.790226	-0.336287	0.792077	0.0590006	1.22914	-0.190306
A0A286YF22	D-3-phosphoglycerate dehydrogenase (EC 1.1.1.95)	PHGDH	PHGDH	55,939	-0.051506	0.964929	0.32667	0.48589	0.448698	1.36481	2.65945e-08	7.57521	0.191905	1.14227	0.00126284	2.89865	0.194469	1.1443	0.00112342	2.94946	0.115713	1.08351	0.0351625	1.45392	0.500204	1.41441	1.1777e-07	6.92897	0.243411	1.18379	0.000924048	3.03431	0.245975	1.18589	0.000839715	3.07587	0.167219	1.12289	0.0148227	1.82907	-0.256793	0.836946	0.000560496	3.25143	-0.25423	0.838435	0.000616852	3.20982	-0.332985
A0A2Q2TH77	Golgin subfamily A member 2	GOLGA2	GOLGA2	111,658	0.1924	1.14266	0.0491174	1.30876	0.202102	1.15037	0.0396805	1.40142	0.199652	1.14842	0.0418941	1.37785	0.13122	1.09522	0.168578	0.773199	0.21515	1.16082	0.0295948	1.52879	0.00970244	1.00675	0.932142	0.0305177	0.00725178	1.00504	0.949253	0.022618	-0.0611799	0.95848	0.592635	0.227213	0.0227497	1.01589	0.841816	0.0747828	-0.00245066	0.998303	0.98284	0.00751739	-0.0708823	0.952056	0.535846	0.27096	0.0130473
A0A2R8Y5J0	Chromodomain-helicase-DNA-binding protein 4	CHD4	CHD4	215,723	-0.0717745	0.951467	0.25109	0.600171	-0.0445374	0.969601	0.471842	0.326204	0.000959497	1.00067	0.987551	0.00544028	0.041773	1.02938	0.499449	0.301509	0.031131	1.02181	0.613843	0.211943	0.0272371	1.01906	0.718072	0.143832	0.072734	1.05171	0.339794	0.468785	0.113547	1.08189	0.142464	0.846294	0.102905	1.07393	0.181704	0.740635	0.0454969	1.03204	0.547636	0.261508	0.0863103	1.06165	0.259513	0.585841	0.0756683
A0A2R8Y5S7	Radixin	RDX	RDX	69,336	0.513032	1.42705	1.80719e-08	7.743	-0.0880068	0.940822	0.139469	0.855522	0.305941	1.23623	3.03614e-05	4.51768	0.19482	1.14458	0.00278308	2.55547	0.252712	1.19145	0.000261261	3.58293	-0.601039	0.659279	3.70052e-08	7.43174	-0.20709	0.866283	0.00777225	2.10945	-0.318212	0.802063	0.000195402	3.70907	-0.260319	0.834903	0.00135368	2.86848	0.393948	1.31398	1.63098e-05	4.78755	0.282827	1.21658	0.000637957	3.19521	0.340719
A0A2R8Y851	40S ribosomal protein S29 (Ribosomal protein S29, isoform CRA_b)	RPS29 hCG_20148	RPS29	10,256	-0.307535	0.808021	4.36211e-05	4.3603	-0.139471	0.907852	0.0288536	1.5398	-0.567314	0.674872	6.16823e-09	8.20984	0.00440867	1.00306	0.941425	0.0262144	-0.26802	0.830459	0.000204383	3.68956	0.168064	1.12355	0.0312302	1.50543	-0.259778	0.835216	0.0018606	2.73035	0.311944	1.24138	0.000345838	3.46113	0.039516	1.02777	0.592073	0.227625	-0.427842	0.743373	8.89022e-06	5.05109	0.14388	1.10487	0.0612305	1.21303	-0.128548
A0A2R8Y880	E3 ubiquitin-protein ligase RBBP6 (Fragment)	RBBP6	RBBP6	197,365	-0.0914038	0.938609	0.254485	0.594338	0.0557293	1.03938	0.482704	0.316319	-0.04375	0.97013	0.580683	0.236061	0.061022	1.0432	0.442677	0.353914	-0.0159453	0.989008	0.839915	0.0757646	0.147133	1.10737	0.138719	0.857863	0.0476538	1.03358	0.622957	0.205542	0.152426	1.11144	0.125809	0.900289	0.0754585	1.0537	0.438347	0.358182	-0.0994793	0.93337	0.309594	0.509207	0.00529271	1.00368	0.95632	0.019397	-0.0716746
A0A2R8YCS7	Deoxynucleoside triphosphate triphosphohydrolase SAMHD1	SAMHD1	SAMHD1	67,943	0.0371793	1.02611	0.696677	0.156968	0.230108	1.17292	0.0236825	1.62557	0.0292093	1.02045	0.759245	0.119618	-0.0182075	0.987459	0.848386	0.0714064	0.0242325	1.01694	0.799226	0.0973306	0.192929	1.14308	0.109313	0.961327	-0.00797008	0.994491	0.945502	0.0243376	-0.0553869	0.962336	0.635707	0.196743	-0.0129468	0.991066	0.911593	0.0401989	-0.200899	0.870008	0.0962956	1.01639	-0.248316	0.841879	0.0433204	1.36331	-0.205876
A0A2R8YD50	Peroxisomal multifunctional enzyme type 2	HSD17B4	HSD17B4	76,838	0.0417692	1.02938	0.568223	0.245482	0.139797	1.10175	0.0662848	1.17859	-0.0454682	0.968975	0.534772	0.271831	0.273247	1.20852	0.00112409	2.9492	0.219782	1.16456	0.00624895	2.20419	0.0980275	1.07031	0.279336	0.553873	-0.0872374	0.941324	0.334211	0.47598	0.231478	1.17404	0.0161602	1.79155	0.178013	1.13132	0.0570146	1.24401	-0.185265	0.879488	0.0484192	1.31498	0.13345	1.09691	0.145691	0.836567	0.0799852
A0A2R8YD85	Dedicator of cytokinesis protein 10	DOCK10	DOCK10	251,315	0.321093	1.24928	0.267501	0.572675	-0.729872	0.602957	0.0173606	1.76044	-0.120302	0.919995	0.673714	0.171524	0.486881	1.40141	0.0990743	1.00404	0.0786525	1.05603	0.782827	0.106334	-1.05097	0.482645	0.00632218	2.19913	-0.441395	0.736422	0.215096	0.667368	0.165788	1.12178	0.635861	0.196638	-0.24244	0.845314	0.49007	0.309742	0.60957	1.5258	0.0922673	1.03495	1.21675	2.32423	0.00209535	2.67874	0.808525
A0A2R8YDT1	Glutamine synthetase (EC 6.3.1.2)	GLUL	GLUL	57,174	0.17856	1.13175	0.422854	0.373809	-0.0551895	0.962468	0.802931	0.095322	-0.162968	0.893186	0.463876	0.333598	0.559441	1.4737	0.0184817	1.73326	0.479256	1.39403	0.039983	1.39813	-0.23375	0.850422	0.39217	0.406526	-0.341528	0.789205	0.215898	0.665751	0.380881	1.30214	0.169503	0.770822	0.300696	1.23174	0.273851	0.562485	-0.107778	0.928016	0.691044	0.160494	0.614631	1.53117	0.0323154	1.49059	0.534446
A0A2R8YF43	Casein kinase II subunit alpha	CSNK2A1	CSNK2A1	41,791	0.00696237	1.00484	0.960996	0.0172786	0.100653	1.07226	0.48231	0.316674	0.0105426	1.00733	0.940971	0.0264236	0.00391315	1.00272	0.978071	0.00962941	-0.0595178	0.959585	0.676571	0.169687	0.0936904	1.0671	0.59238	0.2274	0.00358026	1.00248	0.983618	0.00717371	-0.00304922	0.997889	0.986047	0.00610229	-0.0664802	0.954965	0.703512	0.152728	-0.0901101	0.939451	0.606504	0.217167	-0.0967396	0.935144	0.580481	0.236212	-0.160171
A0A2R8YGD1	Tripeptidyl-peptidase 1	TPP1	TPP1	50,890	0.40517	1.32425	0.035223	1.45317	0.226839	1.17027	0.220666	0.656264	0.428331	1.34568	0.0269208	1.56991	0.264411	1.20115	0.156116	0.806554	0.567381	1.48183	0.00488011	2.31157	-0.178332	0.883724	0.426643	0.369935	0.0231603	1.01618	0.917121	0.0375731	-0.14076	0.907041	0.529119	0.276447	0.16221	1.119	0.469018	0.32881	0.201492	1.14989	0.37013	0.431646	0.037572	1.02639	0.865974	0.0624953	0.340542
A0A2U3TZH3	Elongation factor 1-alpha	EEF1A2	EEF1A2	54,341	-0.138963	0.908172	0.0144244	1.8409	0.0567061	1.04009	0.287487	0.541381	-0.16933	0.889255	0.00387381	2.41186	0.145282	1.10595	0.0110335	1.95729	0.0318428	1.02232	0.546402	0.262488	0.195669	1.14526	0.00590034	2.22912	-0.030367	0.979171	0.637994	0.195183	0.284246	1.21777	0.000230548	3.63724	0.170806	1.12569	0.014124	1.85004	-0.226036	0.854981	0.00196598	2.70642	0.0885762	1.06332	0.178683	0.747918	-0.0248634
A0A3B3IRL5	Inosine-5'-monophosphate dehydrogenase (EC 1.1.1.205) (Fragment)	IMPDH1	IMPDH1	54,384	-0.159768	0.895169	0.011349	1.94504	-0.115951	0.922774	0.0566419	1.24686	-0.212859	0.862825	0.00136519	2.86481	-0.00763523	0.994722	0.895387	0.0479894	-0.137345	0.909191	0.0264385	1.57776	0.0438165	1.03084	0.539664	0.267877	-0.0530915	0.963869	0.458387	0.338768	0.152133	1.11121	0.0424554	1.37207	0.0224227	1.01566	0.752787	0.123328	-0.096908	0.935035	0.182728	0.738196	0.108316	1.07797	0.138543	0.858417	-0.0213939
A0A3B3IRQ9	Double-stranded RNA-specific adenosine deaminase (Fragment)	ADAR	ADAR	128,382	-0.112803	0.92479	0.0445741	1.35092	0.00484697	1.00337	0.927566	0.0326551	-0.138009	0.908772	0.0163108	1.78753	-0.155746	0.897668	0.00774226	2.11113	-0.0937875	0.937059	0.0899791	1.04586	0.11765	1.08497	0.0829791	1.08103	-0.0252061	0.98268	0.700003	0.1549	-0.0429435	0.970673	0.513026	0.28986	0.0190155	1.01327	0.771114	0.112881	-0.142856	0.905724	0.0384358	1.41526	-0.160593	0.894657	0.0216177	1.66519	-0.0986345
A0A3B3ISG8	Ricin B-type lectin domain-containing protein	0	0	64,217	-0.380463	0.768191	0.0888159	1.05151	0.112831	1.08135	0.601704	0.220617	0.0332761	1.02333	0.877278	0.0568626	-0.200696	0.870131	0.356732	0.447658	-0.0642639	0.956433	0.765721	0.115929	0.493294	1.40765	0.0728252	1.13772	0.413739	1.33213	0.127935	0.893012	0.179767	1.1327	0.498161	0.30263	0.316199	1.24505	0.239019	0.621567	-0.079555	0.94635	0.763278	0.117317	-0.313527	0.804672	0.242876	0.614615	-0.177095
A0A3B3ITT5	60S ribosomal protein L29	RPL29	RPL29	18,512	-0.00142966	0.99901	0.980365	0.00861203	-0.14316	0.905533	0.0213901	1.66979	-0.199793	0.870676	0.00233251	2.63218	-0.0766687	0.948245	0.196361	0.706945	-0.108114	0.9278	0.0740387	1.13054	-0.141731	0.906431	0.0572318	1.24236	-0.198363	0.871539	0.0104671	1.98017	-0.075239	0.949185	0.296957	0.527307	-0.106684	0.92872	0.144503	0.840122	-0.0566321	0.961506	0.429694	0.366841	0.0664918	1.04717	0.355238	0.449481	0.0350465
A0A3B3ITZ9	Thyroid hormone receptor-associated protein 3	THRAP3	THRAP3	103,523	0.170052	1.1251	0.00843346	2.07399	-0.0246327	0.983071	0.676821	0.169526	0.0413817	1.0291	0.485531	0.313783	0.124411	1.09006	0.0451342	1.34549	0.0555975	1.03929	0.351101	0.454568	-0.194685	0.873764	0.0128727	1.89033	-0.128671	0.914674	0.0862417	1.06428	-0.0456411	0.968859	0.529484	0.276147	-0.114455	0.923731	0.124165	0.906	0.0660144	1.04682	0.365684	0.436894	0.149044	1.10883	0.0495661	1.30481	0.0802301
A0A3B3IUD2	Protein misato homolog 1	MSTO1	MSTO1	60,646	-0.350419	0.784356	0.00284312	2.5462	-0.133287	0.911752	0.210985	0.675748	-0.10766	0.928092	0.309039	0.509986	-0.281736	0.822601	0.0128249	1.89195	-0.456631	0.728686	0.000256295	3.59126	0.217131	1.16242	0.101043	0.995496	0.242759	1.18325	0.0689595	1.16141	0.0686826	1.04876	0.592682	0.227178	-0.106212	0.929024	0.410423	0.386768	0.0256275	1.01792	0.841299	0.0750495	-0.148449	0.90222	0.253732	0.595624	-0.323343
A0A3F2YNX0	Protein transport protein sec16	SEC16A	SEC16A	228,870	0.14767	1.10778	0.244676	0.611409	-0.0287039	0.980301	0.818155	0.0871643	0.174341	1.12845	0.172394	0.763477	-0.135853	0.910132	0.283248	0.547833	-0.0225249	0.984508	0.856783	0.0671291	-0.176374	0.884924	0.256179	0.591456	0.0266707	1.01866	0.861489	0.0647504	-0.283523	0.821582	0.0748479	1.12582	-0.170195	0.888723	0.272686	0.564337	0.203045	1.15113	0.193449	0.713433	-0.107149	0.928421	0.485851	0.313497	0.00617907
A0A3F2YNX8	Protein-L-isoaspartate O-methyltransferase (EC 2.1.1.77)	PCMT1	PCMT1	26,361	-0.0968006	0.935104	0.188762	0.724086	0.0018381	1.00127	0.979647	0.00893059	0.0448328	1.03156	0.535756	0.271033	-0.0368795	0.974761	0.60992	0.214727	-0.0399467	0.972691	0.580739	0.236019	0.0986387	1.07076	0.271019	0.567	0.141633	1.10315	0.119689	0.921946	0.0599211	1.04241	0.499581	0.301394	0.0568539	1.04019	0.521551	0.282704	0.0429947	1.03025	0.627116	0.202652	-0.0387176	0.97352	0.661596	0.179407	-0.0417848
A0A3F2YNY6	Pre-mRNA-processing factor 40 homolog A	PRPF40A	PRPF40A	112,405	0.0714853	1.0508	0.107611	0.968142	0.0244575	1.0171	0.57088	0.243455	0.0726742	1.05166	0.102246	0.990354	-0.00176258	0.998779	0.967288	0.0144444	-0.00777678	0.994624	0.856467	0.0672895	-0.0470278	0.967928	0.376378	0.424376	0.00118884	1.00082	0.981981	0.00789699	-0.0732479	0.950496	0.174111	0.759173	-0.0792621	0.946542	0.142909	0.84494	0.0482167	1.03399	0.364673	0.438097	-0.0262201	0.98199	0.619489	0.207966	-0.0322343
A0A494C039	Hypoxia up-regulated protein 1	HYOU1	HYOU1	111,406	-0.202113	0.869277	0.00490988	2.30893	-0.17215	0.887519	0.0140132	1.85346	-0.295274	0.814918	0.00016494	3.78267	-0.477762	0.718091	3.1942e-07	6.49564	-0.454883	0.729569	6.61526e-07	6.17945	0.0299629	1.02099	0.70619	0.151078	-0.0931613	0.937466	0.248321	0.604987	-0.27565	0.826078	0.00214841	2.66788	-0.25277	0.839283	0.00421457	2.37525	-0.123124	0.918197	0.131709	0.880383	-0.305613	0.809099	0.00087996	3.05554	-0.282733
A0A494C0R8	Clustered mitochondria protein homolog	CLUH	CLUH	150,466	-0.231402	0.851807	5.60007e-05	4.25181	-0.170368	0.888616	0.00127691	2.89384	-0.341836	0.789036	2.95406e-07	6.52958	0.0530239	1.03744	0.257909	0.588534	-0.11739	0.921854	0.0179158	1.74676	0.0610344	1.04321	0.286752	0.542493	-0.110434	0.926309	0.0615442	1.21081	0.284426	1.21793	5.37005e-05	4.27002	0.114012	1.08223	0.0542482	1.26561	-0.171469	0.887938	0.00595329	2.22524	0.223392	1.16747	0.000687863	3.1625	0.0529772
A0A494C0W0	Poly(A)-specific ribonuclease PARN	PARN	PARN	76,350	-0.0479441	0.967314	0.839314	0.0760755	-0.033622	0.976964	0.886894	0.0521283	-0.0033178	0.997703	0.988799	0.00489215	-0.135551	0.910322	0.567854	0.245763	-0.0523795	0.964344	0.824698	0.0837053	0.0143222	1.00998	0.960535	0.0174867	0.0446264	1.03142	0.8775	0.0567527	-0.0876066	0.941083	0.762399	0.117818	-0.00443537	0.99693	0.987773	0.00534263	0.0303042	1.02123	0.916624	0.0378087	-0.101929	0.931786	0.725127	0.139586	-0.0187575
A0A494C143	Disco-interacting protein 2 homolog A	DIP2A	DIP2A	171,477	0.347068	1.27197	0.0240582	1.61874	0.108169	1.07786	0.455791	0.341235	0.424143	1.34178	0.00733563	2.13456	-0.0630029	0.95727	0.662537	0.17879	0.437556	1.35431	0.00592741	2.22714	-0.238899	0.847392	0.185363	0.731976	0.0770749	1.05488	0.662895	0.178556	-0.410071	0.752586	0.028844	1.53994	0.0904878	1.06473	0.609129	0.21529	0.315974	1.24485	0.0846506	1.07237	-0.171172	0.888121	0.337481	0.47175	0.329387
A0A494C1B8	Tripeptidyl-peptidase 2	TPP2	TPP2	130,290	-0.0717997	0.95145	0.42481	0.371806	-0.0120734	0.991666	0.892403	0.0494391	0.0883986	1.06319	0.327778	0.48442	-0.207261	0.86618	0.0289845	1.53783	-0.113826	0.924134	0.211174	0.67536	0.0597263	1.04227	0.586148	0.231993	0.160198	1.11744	0.15328	0.814515	-0.135461	0.910379	0.223884	0.649976	-0.0420261	0.97129	0.70112	0.154208	0.100472	1.07212	0.363	0.440094	-0.195188	0.873459	0.0855389	1.06784	-0.101752
A0A494C1F2	Nuclear pore complex protein Nup214	NUP214	NUP214	212,484	0.0249087	1.01742	0.781202	0.107237	-0.116602	0.922358	0.202394	0.693803	-0.0743823	0.949749	0.410443	0.386747	-0.0487484	0.966775	0.587756	0.230803	-0.0368743	0.974765	0.681291	0.166667	-0.141511	0.906569	0.206359	0.685377	-0.099291	0.933492	0.370412	0.431315	-0.0736571	0.950226	0.504461	0.297172	-0.061783	0.958079	0.574922	0.240391	0.0422197	1.0297	0.700941	0.154319	0.0678537	1.04816	0.538278	0.268993	0.0797277
A0A494C1K3	General transcription factor II-I	GTF2I	GTF2I	131,047	0.106155	1.07636	0.0434973	1.36154	-0.0422089	0.971167	0.401729	0.396067	-0.15149	0.90032	0.00594987	2.22549	0.0507868	1.03583	0.314896	0.501833	-0.0456736	0.968837	0.364933	0.437787	-0.148364	0.902273	0.0231311	1.6358	-0.257645	0.836452	0.000370171	3.4316	-0.055368	0.962349	0.369744	0.432099	-0.151828	0.900109	0.0204629	1.68903	-0.109281	0.92705	0.0851117	1.07001	0.0929957	1.06658	0.138886	0.857341	-0.00346466
A0A494C1N0	Peptidylprolyl isomerase (EC 5.2.1.8)	FKBP2	FKBP2	18,563	0.116084	1.08379	0.0184857	1.73316	0.0238929	1.0167	0.603565	0.219276	0.196958	1.14628	0.000307219	3.51255	-0.158166	0.896164	0.00227855	2.64234	-0.0321047	0.977992	0.486521	0.312899	-0.0921909	0.938097	0.111991	0.950815	0.0808746	1.05766	0.160249	0.795204	-0.274249	0.82688	7.67748e-05	4.11478	-0.148188	0.902383	0.0146078	1.83542	0.173065	1.12745	0.00536377	2.27053	-0.182058	0.881444	0.00370188	2.43158	-0.0559976
A0A499FI31	Squamous cell carcinoma antigen recognized by T-cells 3	SART3	SART3	111,958	-0.0829303	0.944138	0.576928	0.238878	0.160389	1.11759	0.2857	0.54409	0.0981677	1.07041	0.509675	0.292707	-0.173957	0.886408	0.248075	0.605417	-0.111504	0.925622	0.45462	0.342351	0.243319	1.18371	0.189333	0.722773	0.181098	1.13375	0.323962	0.489506	-0.0910268	0.938854	0.616819	0.209842	-0.0285741	0.980389	0.874836	0.0580732	-0.0622212	0.957788	0.731899	0.135549	-0.334346	0.793144	0.0765754	1.11591	-0.271893
A0A499FJY3	RNA-binding protein 15	RBM15	RBM15	101,312	-0.0329729	0.977404	0.851929	0.0695966	-0.238933	0.847372	0.185751	0.73107	-0.283606	0.821535	0.119453	0.922804	-0.0346087	0.976297	0.844681	0.0733071	-0.281667	0.82264	0.12185	0.914174	-0.20596	0.866962	0.346342	0.460494	-0.250633	0.840528	0.254315	0.594627	-0.00163579	0.998867	0.993965	0.00262904	-0.248694	0.841658	0.257889	0.588567	-0.0446729	0.96951	0.836428	0.0775712	0.204324	1.15215	0.350102	0.455806	-0.0427344
A0AVT1	Ubiquitin-like modifier-activating enzyme 6 (Ubiquitin-activating enzyme 6) (EC 6.2.1.45) (Monocyte protein 4) (MOP-4) (Ubiquitin-activating enzyme E1-like protein 2) (E1-L2)	UBA6 MOP4 UBE1L2	UBA6	117,970	-0.0488898	0.96668	0.369881	0.431938	0.0527265	1.03722	0.334302	0.475861	-0.158974	0.895662	0.00732483	2.1352	0.0379689	1.02667	0.484429	0.31477	-0.0120324	0.991694	0.823679	0.0842422	0.101616	1.07297	0.135149	0.869186	-0.110084	0.926534	0.107175	0.969905	0.0868587	1.06206	0.198219	0.702855	0.0368575	1.02588	0.578584	0.237633	-0.2117	0.863519	0.00405204	2.39233	-0.0147576	0.989823	0.823431	0.0843726	-0.0647589
A0MZ66	Shootin-1 (Shootin1)	SHTN1 KIAA1598	SHTN1	71,640	0.16315	1.11973	0.27152	0.566197	0.162319	1.11908	0.273895	0.562415	0.0948218	1.06793	0.518565	0.285197	0.0813535	1.05801	0.579145	0.237213	0.348108	1.27289	0.0255117	1.59326	-0.000830759	0.999424	0.996296	0.0016117	-0.0683282	0.953743	0.703102	0.152982	-0.0817964	0.94488	0.648462	0.188116	0.184958	1.13678	0.307729	0.511832	-0.0674974	0.954292	0.706531	0.150869	-0.0809657	0.945425	0.651778	0.185901	0.185789
A1X283	SH3 and PX domain-containing protein 2B (Adapter protein HOFI) (Factor for adipocyte differentiation 49) (Tyrosine kinase substrate with four SH3 domains)	SH3PXD2B FAD49 KIAA1295 TKS4	SH3PXD2B	101,579	0.00786726	1.00547	0.950689	0.0219613	-0.225661	0.855203	0.0875118	1.05793	-0.0625385	0.957578	0.624053	0.204779	-0.098715	0.933864	0.441203	0.355361	-0.0467302	0.968128	0.713831	0.146405	-0.233529	0.850552	0.144664	0.83964	-0.0704058	0.95237	0.652184	0.18563	-0.106582	0.928786	0.496453	0.304122	-0.0545974	0.962863	0.726425	0.138809	0.163123	1.11971	0.301668	0.52047	0.126947	1.09198	0.419056	0.377728	0.178931
A2A274	Aconitate hydratase, mitochondrial	ACO2	ACO2	87,820	0.364356	1.28731	0.000840867	3.07527	0.0718207	1.05104	0.448736	0.348009	0.16746	1.12308	0.0866377	1.06229	0.327741	1.25505	0.00210942	2.67584	0.404485	1.32362	0.000305628	3.51481	-0.292535	0.816466	0.0182388	1.739	-0.196896	0.872425	0.0990443	1.00417	-0.0366155	0.974939	0.751066	0.124322	0.0401286	1.02821	0.728154	0.137777	0.095639	1.06854	0.410758	0.386414	0.25592	1.1941	0.0359491	1.44431	0.332664
A2ACR1	Proteasome subunit beta (EC 3.4.25.1)	PSMB9 hCG_17510	PSMB9	20,961	-0.292068	0.816731	0.105541	0.976579	0.0674182	1.04784	0.699759	0.155051	-0.0240892	0.983441	0.890223	0.0505012	-0.424952	0.744863	0.0227748	1.64254	-0.359868	0.779236	0.0496971	1.30367	0.359486	1.28297	0.10393	0.98326	0.267978	1.20412	0.218701	0.660148	-0.132885	0.912006	0.536051	0.270794	-0.0678001	0.954092	0.751353	0.124156	-0.0915075	0.938542	0.669231	0.174424	-0.49237	0.710856	0.0301489	1.52073	-0.427286
A2RTX5	Threonine--tRNA ligase 2, cytoplasmic (EC 6.1.1.3) (Threonyl-tRNA synthetase) (ThrRS) (Threonyl-tRNA synthetase-like protein 2)	TARSL2	TARSL2	92,646	0.300274	1.23138	0.0921379	1.03556	0.187085	1.13846	0.283532	0.547397	0.319112	1.24756	0.0747462	1.12641	0.328274	1.25551	0.0673802	1.17147	0.602785	1.51865	0.00199274	2.70055	-0.113189	0.924542	0.592216	0.22752	0.0188377	1.01314	0.928717	0.0321167	0.0280005	1.0196	0.894227	0.0485521	0.302511	1.23329	0.16117	0.792716	0.132026	1.09583	0.532655	0.273554	0.141189	1.10281	0.504905	0.29679	0.415699
A3KMH1	von Willebrand factor A domain-containing protein 8 (PEX7-binding protein 2) (P7BP2)	VWA8 KIAA0564	VWA8	214,824	-0.250237	0.840759	0.121824	0.914268	-0.10077	0.932535	0.522749	0.281707	-0.225684	0.85519	0.160605	0.79424	-0.254348	0.838366	0.116167	0.934919	-0.305012	0.809435	0.062898	1.20136	0.149466	1.10916	0.440023	0.356525	0.0245529	1.01716	0.898322	0.0465678	-0.00411163	0.997154	0.982925	0.0074798	-0.0547757	0.962744	0.77577	0.110267	-0.124913	0.917059	0.517777	0.285857	-0.153578	0.899018	0.42774	0.36882	-0.204242
A5YKK6	CCR4-NOT transcription complex subunit 1 (CCR4-associated factor 1) (Negative regulator of transcription subunit 1 homolog) (NOT1H) (hNOT1)	CNOT1 CDC39 KIAA1007 NOT1 AD-005	CNOT1	266,939	-0.0692849	0.95311	0.616413	0.210128	0.118938	1.08593	0.392716	0.405922	-0.138824	0.908259	0.320064	0.494763	-0.0453383	0.969063	0.74261	0.129239	-0.14855	0.902157	0.288195	0.540314	0.188223	1.13936	0.272331	0.564903	-0.0695392	0.952942	0.681113	0.166781	0.0239467	1.01674	0.887253	0.0519527	-0.0792648	0.94654	0.639698	0.194025	-0.257762	0.836385	0.137782	0.860807	-0.164276	0.892376	0.336302	0.473271	-0.267487
A6NDG6	Glycerol-3-phosphate phosphatase (G3PP) (EC 3.1.3.21) (Aspartate-based ubiquitous Mg(2+)-dependent phosphatase) (AUM) (EC 3.1.3.48) (Phosphoglycolate phosphatase) (PGP)	PGP	PGP	34,006	-0.061887	0.95801	0.415245	0.381696	0.0857369	1.06123	0.26264	0.580638	0.0352256	1.02472	0.640957	0.193171	-0.0430008	0.970634	0.569672	0.244375	-0.0568801	0.961341	0.453401	0.343517	0.147624	1.10774	0.120755	0.918096	0.0971126	1.06963	0.299123	0.52415	0.0188862	1.01318	0.837875	0.0768207	0.0050069	1.00348	0.956719	0.0192156	-0.0505113	0.965594	0.585435	0.232521	-0.128738	0.914631	0.17296	0.762054	-0.142617
A6NFX8	ADP-sugar pyrophosphatase	NUDT5	NUDT5	25,896	0.0588037	1.0416	0.315735	0.500678	-0.00882095	0.993904	0.878877	0.0560717	0.0349152	1.0245	0.548092	0.261147	0.293011	1.22519	5.04268e-05	4.29734	0.217707	1.16288	0.00108858	2.96314	-0.0676246	0.954208	0.345455	0.461609	-0.0238884	0.983578	0.73643	0.132868	0.234207	1.17626	0.00319716	2.49524	0.158903	1.11644	0.0343329	1.46429	0.0437362	1.03078	0.539101	0.26833	0.301832	1.23271	0.000334951	3.47502	0.226528
A6NHR9	Structural maintenance of chromosomes flexible hinge domain-containing protein 1 (SMC hinge domain-containing protein 1) (EC 3.6.1.-)	SMCHD1 KIAA0650	SMCHD1	226,374	-0.0832601	0.943922	0.384387	0.415232	0.144532	1.10537	0.13826	0.859305	-0.160842	0.894503	0.10118	0.994907	0.0238527	1.01667	0.801502	0.0960956	0.0466267	1.03285	0.623897	0.204887	0.227792	1.17104	0.0607752	1.21627	-0.0775821	0.947645	0.506402	0.295505	0.107113	1.07707	0.361349	0.442073	0.129887	1.09421	0.270676	0.56755	-0.305374	0.809232	0.0148886	1.82715	-0.120679	0.919754	0.305107	0.515547	-0.0979055
A8MQB8	Synaptic functional regulator FMR1	FMR1	FMR1	65,822	0.0670035	1.04754	0.595411	0.225183	0.0176194	1.01229	0.88858	0.0513036	0.157869	1.11564	0.218119	0.661307	0.453598	1.36945	0.00156901	2.80437	0.323684	1.25152	0.0168304	1.77391	-0.0493841	0.966349	0.748752	0.125662	0.090865	1.06501	0.556868	0.254248	0.386594	1.3073	0.0193529	1.71325	0.256681	1.19473	0.106903	0.971011	0.140249	1.1021	0.367367	0.434899	0.435978	1.35283	0.00949774	2.02238	0.306065
A8MUM1	EARP and GARP complex-interacting protein 1	EIPR1	EIPR1	46,320	-0.011838	0.991828	0.916114	0.0380504	0.106606	1.07669	0.348192	0.458182	0.17631	1.12999	0.127747	0.893649	0.023872	1.01668	0.831864	0.0799476	-0.11412	0.923946	0.316046	0.50025	0.118444	1.08556	0.393839	0.404682	0.188148	1.1393	0.181474	0.741187	0.0357101	1.02506	0.795448	0.0993884	-0.102282	0.931558	0.460491	0.336779	0.0697043	1.0495	0.613681	0.212057	-0.082734	0.944267	0.549569	0.259978	-0.220726
A8MV53	HCG2033702, isoform CRA_a (Suppressor of SWI4 1 homolog)	PPAN hCG_2033702	PPAN	47,145	0.135881	1.09876	0.361605	0.441765	-0.00500989	0.996533	0.972882	0.01194	-0.00342838	0.997626	0.98144	0.00813612	0.0699567	1.04969	0.635966	0.196566	0.0331606	1.02325	0.822082	0.0850851	-0.14089	0.906959	0.438544	0.357987	-0.139309	0.907954	0.443624	0.352985	-0.0659239	0.955333	0.71539	0.145457	-0.10272	0.931276	0.570857	0.243473	0.00158151	1.0011	0.993009	0.00304685	0.0749665	1.05334	0.678553	0.168416	0.0381705
A8MXV4	Nucleoside diphosphate-linked moiety X motif 19 (Nudix motif 19) (EC 3.6.1.-)	NUDT19	NUDT19	42,233	-0.287493	0.819325	0.140316	0.852892	0.247717	1.18733	0.200747	0.69735	0.178229	1.13149	0.352535	0.452797	-0.126928	0.915779	0.505634	0.296164	-0.0364918	0.975023	0.847456	0.0718826	0.53521	1.44915	0.0301029	1.52139	0.465721	1.38101	0.0557271	1.25393	0.160565	1.11772	0.491907	0.308117	0.251001	1.19003	0.286726	0.542533	-0.0694887	0.952976	0.765024	0.116325	-0.374645	0.771295	0.117925	0.928394	-0.284209
A8MZF9	Developmentally-regulated GTP-binding protein 2	DRG2	DRG2	38,129	0.0169678	1.01183	0.79441	0.0999554	0.0595312	1.04213	0.365168	0.437508	-0.0621884	0.95781	0.344608	0.462674	0.238318	1.17962	0.00137614	2.86134	0.13111	1.09514	0.0546396	1.26249	0.0425634	1.02994	0.594537	0.225821	-0.0791562	0.946611	0.326425	0.486217	0.221351	1.16582	0.0107067	1.97035	0.114143	1.08233	0.162344	0.789565	-0.12172	0.919092	0.137511	0.861662	0.178787	1.13193	0.0342097	1.46585	0.0715791
A9Z1X7	Serine/arginine repetitive matrix protein 1	SRRM1	SRRM1	103,390	0.0166529	1.01161	0.709302	0.149169	0.082233	1.05866	0.0765134	1.11626	0.0999414	1.07173	0.034397	1.46348	0.0583887	1.0413	0.19977	0.69947	0.0989093	1.07096	0.036099	1.4425	0.0655801	1.04651	0.238128	0.623189	0.0832885	1.05943	0.138142	0.859674	0.0417358	1.02935	0.448072	0.348652	0.0822564	1.05867	0.142828	0.845187	0.0177084	1.01235	0.746076	0.127217	-0.0238443	0.983608	0.663163	0.17838	0.0166762
B0QY89	Eukaryotic translation initiation factor 3 subunit L (eIF3l) (Eukaryotic translation initiation factor 3 subunit 6-interacting protein) (Eukaryotic translation initiation factor 3 subunit E-interacting protein)	EIF3L EIF3EIP EIF3S6IP	EIF3L	70,902	-0.254331	0.838376	1.17465e-06	5.93009	-0.108352	0.927647	0.00859669	2.06567	-0.316868	0.802811	4.18637e-08	7.37816	-0.0828187	0.944211	0.0376591	1.42413	-0.210158	0.864443	1.54871e-05	4.81003	0.145979	1.10648	0.0044453	2.3521	-0.0625369	0.957579	0.185185	0.732395	0.171512	1.12624	0.001214	2.91578	0.0441731	1.03109	0.344013	0.463425	-0.208516	0.865427	0.000181345	3.74149	0.0255333	1.01786	0.581561	0.235405	-0.101806
B0V3J0	tRNA-splicing endonuclease subunit Sen34 (Fragment)	TSEN34	TSEN34	26,101	-0.929877	0.524903	0.0401268	1.39657	0.556394	1.47059	0.203998	0.690373	-0.775652	0.584125	0.0820653	1.08584	-0.0297089	0.979618	0.944805	0.024658	-0.281967	0.822469	0.51339	0.289552	1.48627	2.80164	0.00956478	2.01932	0.154225	1.11282	0.76941	0.113842	0.900168	1.86628	0.0981602	1.00806	0.64791	1.5669	0.226257	0.645397	-1.33205	0.397205	0.0183613	1.7361	-0.586103	0.66614	0.272095	0.56528	-0.838361
B1AJY5	26S proteasome non-ATPase regulatory subunit 10	PSMD10	PSMD10	20,217	0.0845116	1.06033	0.215382	0.66679	-0.0332049	0.977247	0.620702	0.207117	0.0433277	1.03049	0.519368	0.284525	0.0139309	1.0097	0.835115	0.0782535	0.0970303	1.06957	0.157378	0.803056	-0.117717	0.921645	0.161138	0.792802	-0.041184	0.971857	0.616301	0.210207	-0.0705807	0.952255	0.39334	0.405232	0.0125187	1.00872	0.878587	0.0562151	0.0765326	1.05448	0.355447	0.449226	0.0471358	1.03321	0.566674	0.246666	0.130235
B1AJZ9	Forkhead-associated domain-containing protein 1 (FHA domain-containing protein 1)	FHAD1 KIAA1937	FHAD1	161,904	-0.1334	0.91168	0.164283	0.784406	0.223874	1.16787	0.024974	1.60251	-0.166126	0.891233	0.0872725	1.05912	0.0351764	1.02468	0.707473	0.15029	-0.0192513	0.986745	0.837084	0.077231	0.357274	1.281	0.00493845	2.30641	-0.0327252	0.977572	0.775447	0.110448	0.168577	1.12395	0.151903	0.818433	0.114149	1.08234	0.325196	0.487855	-0.389999	0.76313	0.00254	2.59517	-0.188697	0.877398	0.110983	0.954745	-0.243125
B1AK87	F-actin-capping protein subunit beta	CAPZB hCG_41078	CAPZB	29,295	0.111396	1.08027	0.0731441	1.13582	-0.0181195	0.987519	0.76159	0.118279	0.15611	1.11428	0.0153262	1.81456	-0.114138	0.923934	0.0668739	1.17474	-0.0565062	0.96159	0.348897	0.457303	-0.129516	0.914138	0.0877054	1.05697	0.0447133	1.03148	0.542436	0.265652	-0.225535	0.855278	0.00529829	2.27586	-0.167903	0.890136	0.0305211	1.5154	0.174229	1.12836	0.0253912	1.59532	-0.0960188	0.935611	0.198177	0.702946	-0.0383868
B1AKJ5	Deleted.	0	0	0	-0.146821	0.903239	0.0428511	1.36804	-0.167469	0.890403	0.0227731	1.64258	-0.199762	0.870694	0.00803555	2.09498	-0.0456226	0.968872	0.509375	0.292962	-0.222229	0.85724	0.00378911	2.42146	-0.0206487	0.985789	0.80646	0.093417	-0.0529418	0.963969	0.531634	0.274387	0.101198	1.07266	0.237818	0.623755	-0.0754083	0.949073	0.375354	0.425559	-0.0322931	0.977865	0.701916	0.153715	0.121847	1.08813	0.158401	0.800243	-0.0547597
B1ALA9	Ribose-phosphate pyrophosphokinase 1	PRPS1	PRPS1	31,392	-0.0402264	0.972502	0.558682	0.252835	-0.0181271	0.987514	0.791442	0.101581	-0.130886	0.913271	0.0671783	1.17277	0.235982	1.17771	0.0022987	2.63852	0.201198	1.14965	0.00746046	2.12723	0.0220993	1.01544	0.792374	0.10107	-0.0906591	0.939094	0.286744	0.542506	0.276208	1.21101	0.00328666	2.48325	0.241425	1.18216	0.00854113	2.06848	-0.112758	0.924818	0.188541	0.724594	0.254109	1.1926	0.00604882	2.21833	0.219326
B2WTI3	Bifunctional arginine demethylase and lysyl-hydroxylase JMJD6 (Phosphatidylserine receptor transcript variant 1) (Phosphatidylserine receptor, isoform CRA_d)	JMJD6 PTDSR hCG_30900	JMJD6	39,241	-0.0424558	0.971001	0.702023	0.153649	0.0338797	1.02376	0.759975	0.119201	-0.00534758	0.9963	0.961495	0.0170531	0.324979	1.25265	0.00752352	2.12358	0.208178	1.15523	0.0714481	1.14601	0.0763355	1.05434	0.575158	0.240213	0.0371082	1.02606	0.784633	0.105333	0.367435	1.29006	0.012508	1.90281	0.250634	1.18973	0.0760081	1.11914	-0.0392273	0.973176	0.772688	0.111996	0.291099	1.22357	0.0419196	1.37758	0.174298
B3KS98	Eukaryotic translation initiation factor 3 subunit H (eIF3h) (Eukaryotic translation initiation factor 3 subunit 3) (eIF-3 gamma) (eIF3 p40 subunit)	EIF3H EIF3S3 hCG_20900	EIF3H	41,581	0.0135825	1.00946	0.749278	0.125357	0.010539	1.00733	0.804052	0.0947157	-0.0826249	0.944338	0.0626353	1.20318	0.149189	1.10895	0.00195277	2.70935	0.0540804	1.0382	0.211656	0.67437	-0.00304351	0.997893	0.953315	0.0207637	-0.0962074	0.935489	0.0755458	1.12179	0.135607	1.09855	0.0156105	1.80658	0.0404979	1.02847	0.439432	0.357108	-0.0931638	0.937465	0.0845262	1.07301	0.13865	1.10087	0.0137142	1.86283	0.0435414
B3KSI3	Branched-chain-amino-acid aminotransferase (EC 2.6.1.42)	BCAT2	BCAT2	39,916	0.134551	1.09775	0.266819	0.573784	0.195052	1.14477	0.113305	0.945749	0.245353	1.18538	0.0502524	1.29884	0.0999853	1.07176	0.406032	0.391439	0.254922	1.19327	0.0426778	1.3698	0.0605003	1.04283	0.679437	0.167851	0.110801	1.07983	0.451452	0.345389	-0.0345661	0.976325	0.813092	0.0898605	0.120371	1.08701	0.413939	0.383063	0.0503012	1.03548	0.730998	0.136084	-0.0950664	0.936229	0.51745	0.286132	0.0598702
B4DG22	Non-specific serine/threonine protein kinase (EC 2.7.11.1)	RPS6KA3	RPS6KA3	80,583	0.0239492	1.01674	0.618824	0.208433	-0.146547	0.90341	0.00571743	2.2428	-0.131174	0.913088	0.0118286	1.92707	0.120402	1.08704	0.0194146	1.71187	-0.0719565	0.951347	0.144503	0.840123	-0.170496	0.888537	0.00810974	2.09099	-0.155124	0.898055	0.0145832	1.83615	0.0964532	1.06914	0.112077	0.950485	-0.0959057	0.935685	0.114002	0.943087	0.0153722	1.01071	0.793835	0.10027	0.266949	1.20326	0.000171262	3.76634	0.0745902
B4DJ07	Exocyst complex component 7 (Exocyst complex component Exo70)	EXOC7	EXOC7	74,672	-0.131079	0.913149	0.33005	0.48142	0.160686	1.11782	0.235227	0.628513	-0.114355	0.923795	0.394126	0.404365	0.0725656	1.05159	0.586631	0.231635	0.106991	1.07698	0.424758	0.371858	0.291765	1.22414	0.0846027	1.07262	0.016724	1.01166	0.918212	0.0370572	0.203644	1.1516	0.219907	0.65776	0.23807	1.17941	0.154297	0.811642	-0.275041	0.826427	0.102621	0.988765	-0.0881205	0.940748	0.589786	0.229306	-0.0536949
B4DJ81	NADH-ubiquinone oxidoreductase 75 kDa subunit, mitochondrial (cDNA FLJ60586, highly similar to NADH-ubiquinone oxidoreductase 75 kDa subunit, mitochondrial)	NDUFS1	NDUFS1	66,922	0.0331148	1.02322	0.680445	0.167207	0.0434174	1.03055	0.589775	0.229314	0.0704351	1.05003	0.384572	0.415022	0.0572083	1.04045	0.478627	0.320003	0.114388	1.08252	0.164252	0.784488	0.0103026	1.00717	0.916508	0.0378639	0.0373204	1.02621	0.704605	0.152054	0.0240936	1.01684	0.806449	0.0934231	0.0812732	1.05795	0.412181	0.384912	0.0270177	1.0189	0.783553	0.105932	0.0137909	1.0096	0.888413	0.0513852	0.0709706
B4DK25	Arginyl-tRNA--protein transferase 1 (Arginyltransferase 1) (R-transferase 1) (EC 2.3.2.8) (Arginine-tRNA--protein transferase 1)	ATE1	ATE1	45,832	-0.084545	0.943082	0.542962	0.26523	-0.0456031	0.968885	0.741983	0.129606	0.00310889	1.00216	0.982069	0.00785801	0.0959151	1.06874	0.490678	0.309204	0.0511129	1.03606	0.71222	0.147386	0.0389419	1.02736	0.818317	0.0870783	0.0876539	1.06264	0.606096	0.217459	0.18046	1.13325	0.29356	0.532303	0.135658	1.09859	0.426989	0.369584	0.048712	1.03434	0.773933	0.111296	0.141518	1.10307	0.407618	0.389746	0.0967161
B4DKY1	Cysteinyl-tRNA synthetase 1 (cDNA FLJ59563, highly similar to Cysteinyl-tRNA synthetase)	CARS1	CARS1	84,278	-0.0139076	0.990406	0.774635	0.110903	0.265776	1.20228	1.94352e-05	4.71141	0.0586768	1.04151	0.234958	0.62901	0.256815	1.19484	2.96843e-05	4.52747	0.186782	1.13822	0.000885585	3.05277	0.279683	1.21393	0.000116352	3.93423	0.0725844	1.0516	0.230463	0.637398	0.270723	1.20641	0.000166	3.77989	0.20069	1.14925	0.00269998	2.56864	-0.207099	0.866277	0.00209611	2.67859	-0.00896074	0.993808	0.880183	0.0554271	-0.0789937
B4DL54	Protein farnesyltransferase subunit beta (FTase-beta) (EC 2.5.1.58)	CHURC1-FNTB	CHURC1-FNTB	52,785	0.169691	1.12482	0.204843	0.68858	0.157314	1.11521	0.23852	0.622476	0.229933	1.17278	0.0909386	1.04125	0.0493933	1.03483	0.706897	0.150644	0.174632	1.12868	0.192483	0.715607	-0.0123771	0.991458	0.93857	0.0275333	0.0602419	1.04264	0.708059	0.149931	-0.120297	0.919998	0.456966	0.340116	0.00494108	1.00343	0.975454	0.010793	0.072619	1.05162	0.651962	0.185778	-0.10792	0.927925	0.503988	0.297579	0.0173181
B4DLN1	cDNA FLJ60124, highly similar to Mitochondrial dicarboxylate carrier	0	0	48,099	0.0109032	1.00759	0.897386	0.0470208	0.191947	1.1423	0.0323278	1.49042	0.164958	1.12113	0.0620317	1.20739	0.0763313	1.05433	0.371368	0.430195	0.238285	1.17959	0.00976283	2.01042	0.181043	1.1337	0.0917617	1.03734	0.154055	1.11269	0.147421	0.831441	0.0654281	1.0464	0.529449	0.276176	0.227381	1.17071	0.0377623	1.42294	-0.0269888	0.981467	0.794495	0.099909	-0.115615	0.922989	0.271452	0.566308	0.0463379
B4DQI4	Protein ABHD14B (cDNA FLJ52723, highly similar to Abhydrolase domain-containing protein 14B)	ABHD14B	ABHD14B	19,756	0.146246	1.10669	0.0270307	1.56814	0.189547	1.14041	0.0057317	2.24172	0.196432	1.14586	0.00443748	2.35286	0.255887	1.19407	0.000464301	3.3332	0.233278	1.1755	0.00110179	2.9579	0.0433007	1.03047	0.570643	0.243635	0.0501856	1.0354	0.511591	0.291077	0.10964	1.07896	0.159769	0.796506	0.0870312	1.06218	0.260102	0.584856	0.0068849	1.00478	0.927866	0.0325148	0.0663395	1.04706	0.387506	0.411722	0.0437305
B4DUC8	S-methyl-5'-thioadenosine phosphorylase (EC 2.4.2.28) (5'-methylthioadenosine phosphorylase) (MTA phosphorylase) (MTAP) (MTAPase)	MTAP	MTAP	33,186	-0.0172417	0.98812	0.839187	0.0761415	-0.060018	0.959252	0.482455	0.316543	0.154134	1.11275	0.080906	1.09202	-0.0831847	0.943972	0.333057	0.477481	0.107323	1.07723	0.215231	0.667095	-0.0427763	0.970785	0.681497	0.166536	0.171375	1.12613	0.110724	0.955758	-0.065943	0.955321	0.528137	0.277254	0.124564	1.09018	0.239301	0.621056	0.214152	1.16002	0.0500306	1.30076	-0.0231667	0.98407	0.823838	0.084158	0.167341
B4DY08	Heterogeneous nuclear ribonucleoproteins C1/C2 (cDNA FLJ53542, highly similar to Heterogeneous nuclear ribonucleoproteins C)	HNRNPC	HNRNPC	31,972	-0.0279815	0.980792	0.483818	0.315318	0.0366774	1.02575	0.36085	0.442673	-0.0818461	0.944848	0.0498572	1.30227	0.0827796	1.05906	0.0475374	1.32296	-4.56472e-05	0.999968	0.999083	0.000398454	0.0646589	1.04584	0.193298	0.713772	-0.0538646	0.963352	0.275395	0.560044	0.110761	1.0798	0.0319058	1.49613	0.0279359	1.01955	0.56736	0.246141	-0.118523	0.92113	0.022712	1.64375	0.0461022	1.03247	0.348623	0.457644	-0.0367231
B4DYU2	Conserved oligomeric Golgi complex subunit 8 (COG complex subunit 8) (Component of oligomeric Golgi complex 8)	COG8	COG8	71,209	0.110008	1.07923	0.659872	0.18054	-0.0477531	0.967442	0.848197	0.0715033	-0.0884638	0.940524	0.723182	0.140753	0.0416479	1.02929	0.867398	0.0617818	-0.095966	0.935646	0.700874	0.15436	-0.157761	0.896415	0.60666	0.217055	-0.198471	0.871473	0.51799	0.285679	-0.0683597	0.953722	0.822991	0.0846049	-0.205974	0.866953	0.502468	0.298891	-0.0407107	0.972176	0.893975	0.0486745	0.089401	1.06393	0.769963	0.11353	-0.0482129
B4E2I4	Glutamate--cysteine ligase catalytic subunit (cDNA FLJ58227, highly similar to Glutamate--cysteine ligase catalytic subunit)	GCLC	GCLC	66,464	0.247015	1.18675	0.00160957	2.79329	-0.0406164	0.972239	0.555972	0.254947	0.0319038	1.02236	0.643148	0.191689	0.407331	1.32623	6.97227e-06	5.15663	0.20576	1.15329	0.00652771	2.18524	-0.287631	0.819246	0.00244229	2.6122	-0.215111	0.86148	0.0174656	1.75782	0.160316	1.11753	0.0678387	1.16852	-0.0412551	0.971809	0.624834	0.204235	0.0725202	1.05155	0.392964	0.405647	0.447948	1.3641	2.74991e-05	4.56068	0.246376
B5MBZ0	Echinoderm microtubule-associated protein-like 4	EML4	EML4	110,178	-0.412766	0.751182	0.00226387	2.64515	0.0436839	1.03074	0.715318	0.145501	-0.136343	0.909822	0.261811	0.582012	-0.464981	0.724481	0.000806475	3.09341	-0.481551	0.716207	0.000580371	3.23629	0.45645	1.37216	0.0049451	2.30583	0.276422	1.21119	0.0703328	1.15284	-0.0522148	0.964455	0.721856	0.14155	-0.0687856	0.95344	0.639498	0.194161	-0.180027	0.882686	0.227546	0.642931	-0.508664	0.702873	0.00215289	2.66698	-0.525235
B5MCF9	Pescadillo homolog	PES1	PES1	66,077	-0.216678	0.860545	0.000196862	3.70584	-0.0734838	0.95034	0.139273	0.856132	-0.305389	0.809224	2.96626e-06	5.52779	-0.000407829	0.999717	0.993267	0.00293387	-0.101325	0.932177	0.0463753	1.33371	0.143194	1.10435	0.0235874	1.62732	-0.0887114	0.940362	0.144714	0.839488	0.21627	1.16173	0.00140759	2.85152	0.115353	1.08324	0.0623736	1.205	-0.231905	0.85151	0.000752749	3.12335	0.073076	1.05196	0.225651	0.646562	-0.0278407
B5MD17	Chromobox protein homolog 1 (Fragment)	CBX1	CBX1	19,326	-0.09184	0.938325	0.188878	0.723818	0.0807249	1.05755	0.245834	0.609359	-0.0451844	0.969166	0.511038	0.291547	0.121765	1.08807	0.0863648	1.06366	0.0316941	1.02221	0.643879	0.191196	0.172565	1.12706	0.049869	1.30217	0.0466556	1.03287	0.578917	0.237383	0.213605	1.15958	0.017726	1.75139	0.123534	1.0894	0.150788	0.821635	-0.125909	0.916426	0.143482	0.843202	0.0410403	1.02886	0.625123	0.204035	-0.0490308
B5MDF5	GTP-binding nuclear protein Ran	RAN hCG_1744585	RAN	26,224	-0.0883074	0.940626	0.0457873	1.33926	0.125065	1.09056	0.00680454	2.1672	-0.0504724	0.96562	0.23774	0.623898	0.165374	1.12146	0.000717782	3.14401	0.122095	1.08831	0.00799486	2.09719	0.213372	1.1594	0.000435348	3.36116	0.037835	1.02657	0.465011	0.332537	0.253682	1.19225	6.8507e-05	4.16426	0.210403	1.15701	0.000499316	3.30162	-0.175537	0.885438	0.00248232	2.60514	0.0403093	1.02833	0.436748	0.359769	-0.00296965
B7Z385	Adenylyl cyclase-associated protein	CAP2	CAP2	39,911	0.231879	1.17436	0.5071	0.294906	0.0561684	1.0397	0.871673	0.0596466	-0.218897	0.859222	0.530921	0.27497	0.379213	1.30063	0.282378	0.549169	-0.00960136	0.993367	0.977964	0.00967706	-0.17571	0.885332	0.680454	0.167201	-0.450776	0.731649	0.296376	0.528157	0.147335	1.10752	0.729677	0.13687	-0.24148	0.845877	0.572124	0.24251	-0.275065	0.826413	0.5204	0.283663	0.323045	1.25097	0.451235	0.345597	-0.0657698
B7Z5P7	Leupaxin	LPXN	LPXN	41,643	-0.880399	0.543217	0.000285875	3.54382	-0.435958	0.739203	0.0422525	1.37415	-0.428527	0.74302	0.0455319	1.34168	-1.80662	0.28586	1.74904e-08	7.7572	-1.64964	0.318719	7.48915e-08	7.12557	0.44444	1.36079	0.0860199	1.0654	0.451872	1.36781	0.0812643	1.0901	-0.926222	0.526235	0.00121534	2.9153	-0.769242	0.586726	0.00531073	2.27485	0.00743188	1.00516	0.976215	0.0104544	-1.37066	0.386714	1.85067e-05	4.73267	-1.21368
B7Z6D5	Probable ATP-dependent RNA helicase DDX27 (cDNA FLJ61659, highly similar to Probable ATP-dependent RNA helicase DDX27)	DDX27	DDX27	86,605	-0.027537	0.981094	0.78247	0.106532	-0.0937829	0.937062	0.351902	0.453578	-0.272493	0.827888	0.0117961	1.92826	0.16338	1.11991	0.112373	0.949338	-0.0884461	0.940535	0.379409	0.420892	-0.0662459	0.95512	0.588615	0.230169	-0.244956	0.843841	0.0555218	1.25554	0.190917	1.14149	0.128775	0.89017	-0.0609091	0.95866	0.618796	0.208452	-0.17871	0.883492	0.153631	0.81352	0.257163	1.19513	0.0453603	1.34332	0.00533679
B7Z7F3	Ran-binding protein 3 (cDNA FLJ58549, highly similar to Ran-binding protein 3)	RANBP3	RANBP3	52,895	0.0931735	1.06671	0.584007	0.233582	-0.0422881	0.971114	0.803159	0.0951982	0.0179602	1.01253	0.915636	0.0382769	0.0613359	1.04343	0.717934	0.143915	-0.0432318	0.970479	0.798867	0.0975255	-0.135462	0.910378	0.516358	0.287049	-0.0752133	0.949202	0.717603	0.144116	-0.0318376	0.978174	0.878162	0.0564255	-0.136405	0.909783	0.513471	0.289484	0.0602483	1.04265	0.77191	0.112433	0.103624	1.07447	0.618809	0.208443	-0.000943693
B7Z9I1	Medium-chain-specific acyl-CoA dehydrogenase, mitochondrial (cDNA, FLJ78845, highly similar to Medium-chain specific acyl-CoA dehydrogenase, mitochondrial)	ACADM	ACADM	42,427	0.158058	1.11578	0.0227882	1.64229	-0.155453	0.89785	0.0248405	1.60484	0.0389088	1.02734	0.550676	0.259104	0.128302	1.09301	0.0590166	1.22903	0.149919	1.10951	0.029784	1.52602	-0.313511	0.804681	0.000707732	3.15013	-0.119149	0.920731	0.14468	0.839593	-0.0297558	0.979586	0.708667	0.149558	-0.00813917	0.994374	0.918461	0.0369392	0.194362	1.14422	0.0223103	1.65149	0.283755	1.21736	0.00171717	2.76519	0.305372
B8ZZQ6	Prothymosin alpha	PTMA	PTMA	11,759	-0.0696274	0.952884	0.22268	0.652319	-0.0556888	0.962135	0.326163	0.486565	-0.143072	0.905589	0.0176126	1.75418	-0.0408055	0.972112	0.469364	0.32849	-0.115244	0.923226	0.0502422	1.29893	0.0139386	1.00971	0.83911	0.0761809	-0.0734446	0.950366	0.291294	0.535668	0.0288219	1.02018	0.675137	0.170608	-0.0456166	0.968876	0.508532	0.293681	-0.0873832	0.941228	0.211877	0.673917	0.0148833	1.01037	0.828383	0.0817689	-0.0595552
B9A067	MICOS complex subunit MIC60 (Mitofilin)	IMMT	IMMT	78,974	0.246308	1.18617	0.277819	0.556238	0.11523	1.08315	0.607492	0.216459	0.338839	1.26474	0.140494	0.852341	-0.0883907	0.940571	0.693169	0.159161	0.0509735	1.03596	0.819774	0.0863056	-0.131078	0.913149	0.63315	0.198493	0.0925316	1.06624	0.735795	0.133243	-0.334698	0.79295	0.230128	0.638031	-0.195334	0.873371	0.47845	0.320163	0.223609	1.16765	0.418047	0.378774	-0.203621	0.868369	0.460234	0.337021	-0.0642564
B9EGQ5	Protein Wiz (WIZ protein)	WIZ	WIZ	89,055	-0.244114	0.844334	0.251077	0.600192	-0.100148	0.932937	0.633042	0.198568	-0.0563903	0.961667	0.787646	0.103669	-0.14042	0.907255	0.504392	0.297232	-0.230393	0.852403	0.277849	0.556192	0.143966	1.10494	0.575618	0.239866	0.187724	1.13897	0.466653	0.331006	0.103694	1.07452	0.686233	0.163528	0.0137213	1.00956	0.957282	0.01896	0.0437576	1.0308	0.864411	0.0632796	-0.0402723	0.972471	0.875111	0.0579367	-0.130245
B9ZVN9	DNA-directed RNA polymerase subunit (EC 2.7.7.6)	POLR1A	POLR1A	187,808	-0.186242	0.878892	0.148993	0.826834	-0.0522265	0.964447	0.678366	0.168536	-0.0581518	0.960494	0.644438	0.190819	-0.203121	0.868669	0.117265	0.930833	-0.0579606	0.960621	0.645521	0.19009	0.134016	1.09734	0.388384	0.410739	0.12809	1.09285	0.409326	0.387931	-0.0168789	0.988369	0.912685	0.0396791	0.128281	1.09299	0.408639	0.38866	-0.00592534	0.995901	0.96929	0.0135462	-0.150895	0.900692	0.332655	0.478005	-0.00573414
C9J0K6	Sorcin	SRI	SRI	17,605	0.255214	1.19351	0.000484762	3.31447	-0.168315	0.889881	0.0125786	1.90037	0.321236	1.2494	3.98941e-05	4.39909	-0.233674	0.850466	0.00110263	2.95757	-0.0272917	0.981261	0.661596	0.179407	-0.423529	0.745598	1.6107e-05	4.79299	0.0660214	1.04683	0.390574	0.408296	-0.488889	0.712574	2.39228e-06	5.62119	-0.282506	0.822162	0.00123646	2.90782	0.489551	1.40401	2.34766e-06	5.62936	-0.0653596	0.955707	0.395255	0.403123	0.141023
C9J1C6	E3 ubiquitin-protein ligase RNF181	RNF181	RNF181	16,031	-0.235351	0.849478	0.129339	0.888272	-0.254779	0.838116	0.102243	0.990368	-0.149793	0.901379	0.326071	0.486688	-0.324743	0.798441	0.0411092	1.38606	-0.280365	0.823383	0.0740867	1.13026	-0.0194277	0.986624	0.916164	0.0380268	0.0855577	1.0611	0.643799	0.19125	-0.0893916	0.939919	0.6291	0.201281	-0.0450137	0.969281	0.807423	0.092899	0.104985	1.07548	0.570974	0.243383	-0.0699639	0.952662	0.705091	0.151755	-0.025586
C9J2Y9	DNA-directed RNA polymerase subunit beta (EC 2.7.7.6)	POLR2B	POLR2B	133,057	-0.00606549	0.995805	0.946318	0.0239627	-0.0900682	0.939478	0.323382	0.490285	-0.229785	0.852762	0.0177212	1.75151	-0.0392042	0.973192	0.664161	0.177727	-0.123601	0.917894	0.179933	0.74489	-0.0840028	0.943436	0.449708	0.34707	-0.22372	0.856355	0.0532846	1.2734	-0.0331387	0.977292	0.764153	0.116819	-0.117535	0.921761	0.293495	0.532399	-0.139717	0.907697	0.214333	0.668911	0.050864	1.03589	0.645658	0.189998	-0.0335325
C9J363	Programmed cell death 10, isoform CRA_b (Programmed cell death protein 10)	PDCD10 hCG_27561	PDCD10	17,534	0.0307729	1.02156	0.834782	0.0784268	-0.0433227	0.970417	0.76916	0.113983	-0.0592329	0.959774	0.688514	0.162087	0.167166	1.12285	0.26451	0.577557	-2.89069e-05	0.99998	0.999844	6.79342e-05	-0.0740956	0.949937	0.682244	0.16606	-0.0900058	0.939519	0.619322	0.208084	0.136393	1.09915	0.453349	0.343567	-0.0308018	0.978876	0.864625	0.0631722	-0.0159103	0.989032	0.929807	0.0316074	0.210489	1.15708	0.251738	0.599051	0.0432938
C9J5H8	Neurochondrin (Fragment)	NCDN	NCDN	26,367	-0.0571681	0.961149	0.735541	0.133393	-0.437235	0.738549	0.0163704	1.78594	-0.114939	0.923422	0.498956	0.301938	-0.199148	0.871065	0.246727	0.607783	-0.0872596	0.941309	0.606856	0.216915	-0.380067	0.768402	0.0777019	1.10957	-0.0577705	0.960748	0.780384	0.107691	-0.14198	0.906275	0.495318	0.305116	-0.0300915	0.979358	0.884446	0.0533284	0.322297	1.25032	0.130502	0.884382	0.238087	1.17943	0.257806	0.588708	0.349976
C9J8Q5	Succinate-semialdehyde dehydrogenase (EC 1.2.1.24)	ALDH5A1	ALDH5A1	53,868	0.202001	1.15029	0.205512	0.687163	0.332181	1.25892	0.0437602	1.35892	0.240393	1.18131	0.135065	0.869459	0.434546	1.35149	0.0106666	1.97197	0.480961	1.39567	0.00542635	2.26549	0.13018	1.09443	0.499045	0.30186	0.0383914	1.02697	0.841155	0.0751239	0.232544	1.17491	0.232972	0.632697	0.27896	1.21332	0.15563	0.807908	-0.0917883	0.938359	0.632634	0.198847	0.102365	1.07353	0.594222	0.226052	0.14878
C9J9K3	40S ribosomal protein SA (Fragment)	RPSA	RPSA	29,405	-0.02641	0.981861	0.66064	0.180035	-0.00934625	0.993543	0.876269	0.0573627	-0.0443525	0.969725	0.462912	0.334501	-0.0671634	0.954513	0.270443	0.567923	-0.0906702	0.939086	0.141624	0.848863	0.0170637	1.0119	0.816525	0.0880305	-0.0179425	0.98764	0.807271	0.0929807	-0.0407534	0.972147	0.580701	0.236048	-0.0642602	0.956436	0.386465	0.41289	-0.0350062	0.976028	0.634826	0.197346	-0.0578171	0.960717	0.435032	0.361479	-0.0813239
C9JBI3	Phosphoserine phosphatase (Fragment)	PSPH	PSPH	20,745	-0.0147651	0.989818	0.8906	0.0503173	0.100736	1.07232	0.353203	0.451976	0.25962	1.19716	0.023589	1.62729	-0.233896	0.850335	0.0391188	1.40761	-0.216371	0.860728	0.054553	1.26318	0.115501	1.08335	0.384138	0.415513	0.274385	1.20948	0.0472303	1.32578	-0.219131	0.859083	0.106855	0.971204	-0.201606	0.869582	0.136014	0.866415	0.158884	1.11642	0.235131	0.628691	-0.334632	0.792987	0.017918	1.74671	-0.317107
C9JFR7	Cytochrome c (Fragment)	CYCS	CYCS	11,333	0.0589052	1.04168	0.221606	0.654419	0.0819501	1.05845	0.0945028	1.02456	0.146651	1.107	0.0051237	2.29042	-0.173354	0.886778	0.0013662	2.86449	0.0250558	1.01752	0.597476	0.22368	0.0230448	1.0161	0.69126	0.160359	0.0877456	1.06271	0.140568	0.852115	-0.23226	0.8513	0.000603774	3.21913	-0.0338495	0.97681	0.560561	0.251377	0.0647008	1.04587	0.271262	0.566611	-0.255304	0.83781	0.000234871	3.62917	-0.0568943
C9JFV4	Proline-, glutamic acid- and leucine-rich protein 1	PELP1	PELP1	124,944	0.0155756	1.01085	0.776939	0.109613	0.0329235	1.02308	0.550665	0.259113	0.127071	1.09207	0.029535	1.52966	-0.00764115	0.994718	0.889375	0.0509153	0.0651849	1.04622	0.243425	0.613634	0.0173479	1.0121	0.796646	0.0987345	0.111495	1.08035	0.108754	0.963556	-0.0232167	0.984036	0.730367	0.136459	0.0496093	1.03498	0.463853	0.333619	0.0941474	1.06743	0.171734	0.765144	-0.0405646	0.972274	0.5483	0.260982	0.0322614
C9JG87	39S ribosomal protein L39, mitochondrial (Fragment)	MRPL39	MRPL39	34,033	0.0437493	1.03079	0.813201	0.0898022	0.109514	1.07886	0.555644	0.255203	-0.102109	0.93167	0.582465	0.23473	0.0484629	1.03416	0.79354	0.100431	0.215642	1.16122	0.251715	0.599091	0.065765	1.04664	0.771874	0.112454	-0.145858	0.903842	0.521941	0.282378	0.00471361	1.00327	0.983404	0.00726819	0.171893	1.12654	0.451362	0.345475	-0.211623	0.863565	0.355567	0.449078	-0.0610514	0.958565	0.787788	0.103591	0.106128
C9JIF9	Acylamino-acid-releasing enzyme	APEH	APEH	81,674	-0.142531	0.905929	0.0607655	1.21634	0.128917	1.09347	0.0873998	1.05849	0.153758	1.11246	0.0445169	1.35147	-0.176421	0.884896	0.0231169	1.63607	-0.00448159	0.996898	0.950812	0.0219055	0.271448	1.20702	0.00575745	2.23977	0.296289	1.22798	0.00301301	2.521	-0.0338898	0.976783	0.703797	0.152552	0.138049	1.10042	0.13178	0.880149	0.0248411	1.01737	0.780305	0.107736	-0.305338	0.809253	0.00237429	2.62447	-0.133399
C9JLU1	DNA-directed RNA polymerases I, II, and III subunit RPABC3 (Fragment)	POLR2H	POLR2H	16,925	-0.163515	0.892847	0.0188028	1.72578	-0.0641186	0.95653	0.328233	0.483817	-0.364134	0.776935	1.40357e-05	4.85276	0.218771	1.16374	0.00270196	2.56832	-0.0675982	0.954225	0.303306	0.518118	0.0993959	1.07132	0.219176	0.659207	-0.200619	0.870177	0.0186197	1.73003	0.382286	1.30341	8.95442e-05	4.04796	0.0959163	1.06874	0.235135	0.628682	-0.300015	0.812244	0.00104154	2.98232	0.28289	1.21663	0.00173508	2.76068	-0.00347956
C9JP00	Muscleblind-like protein 1	MBNL1	MBNL1	37,899	0.00834549	1.0058	0.873935	0.0585207	0.033279	1.02334	0.528882	0.276641	0.0128492	1.00895	0.807092	0.0930767	-0.0349685	0.976053	0.508395	0.293799	-0.0987546	0.933839	0.0716425	1.14483	0.0249336	1.01743	0.699175	0.155414	0.00450373	1.00313	0.94425	0.024913	-0.043314	0.970423	0.503644	0.297876	-0.1071	0.928452	0.107664	0.96793	-0.0204298	0.985939	0.751373	0.124144	-0.0682476	0.953796	0.295975	0.528744	-0.132034
C9JP16	Cartilage-associated protein	CRTAP	CRTAP	41,433	-0.0271729	0.981341	0.755808	0.121588	-0.191009	0.875993	0.0383681	1.41603	-0.0873486	0.941251	0.322886	0.490951	-0.308851	0.807285	0.00184467	2.73408	-0.364061	0.776975	0.000411899	3.38521	-0.163836	0.892649	0.13624	0.865696	-0.0601757	0.959147	0.574954	0.240367	-0.281678	0.822634	0.0147139	1.83227	-0.336888	0.791747	0.00455985	2.34105	0.10366	1.0745	0.337768	0.471381	-0.117842	0.921565	0.277435	0.556839	-0.173052
C9JQV0	Uncharacterized protein C7orf50 (Fragment)	C7orf50	C7orf50	21,883	0.0887026	1.06341	0.282732	0.548625	-0.136241	0.909887	0.105445	0.976975	-0.0827042	0.944286	0.315646	0.5008	-0.218682	0.85935	0.0131088	1.88244	-0.187429	0.878169	0.0301849	1.52021	-0.224943	0.855629	0.0332702	1.47794	-0.171407	0.887976	0.0968712	1.01381	-0.307385	0.808105	0.00533002	2.27327	-0.276131	0.825802	0.0108825	1.96327	0.0535367	1.03781	0.592474	0.227331	-0.0824415	0.944458	0.412102	0.384995	-0.0511878
C9JRZ6	MICOS complex subunit	CHCHD3	CHCHD3	26,753	0.25967	1.19721	0.130137	0.885599	0.17455	1.12861	0.301355	0.520921	0.286249	1.21947	0.0972018	1.01233	-0.110969	0.925966	0.507739	0.29436	0.049424	1.03485	0.766982	0.115215	-0.0851207	0.942706	0.677232	0.169263	0.0265782	1.01859	0.896387	0.0475043	-0.37064	0.773439	0.0806978	1.09314	-0.210246	0.86439	0.309202	0.509757	0.111699	1.0805	0.585512	0.232464	-0.285519	0.820446	0.171848	0.764856	-0.125126
C9JTN7	Nucleolysin TIA-1 isoform p40	TIA1	TIA1	31,625	0.220344	1.16501	0.0831957	1.0799	0.0769168	1.05476	0.531712	0.274323	0.142016	1.10345	0.25373	0.595628	0.0932039	1.06674	0.4496	0.347173	0.347763	1.27259	0.00927707	2.03259	-0.143427	0.905366	0.344106	0.463307	-0.0783287	0.947154	0.602507	0.220038	-0.12714	0.915645	0.400534	0.397361	0.127419	1.09234	0.399522	0.398459	0.0650987	1.04616	0.664801	0.177308	0.0162871	1.01135	0.913482	0.0393002	0.270846
C9JTY3	Protein TFG (Fragment)	TFG	TFG	14,759	0.197153	1.14643	0.028818	1.54034	0.0858996	1.06135	0.317161	0.49872	0.301189	1.23216	0.00178794	2.74765	0.0689613	1.04896	0.419865	0.376891	0.241823	1.18249	0.00905954	2.04289	-0.111254	0.925783	0.290848	0.536334	0.104036	1.07478	0.322437	0.491555	-0.128192	0.914977	0.225667	0.646532	0.04467	1.03145	0.667798	0.175355	0.215289	1.16094	0.0486167	1.31321	-0.0169383	0.988328	0.870469	0.0602467	0.155924
C9JVE2	DCN1-like protein (Defective in cullin neddylation protein 1-like protein)	DCUN1D1 hCG_17206	DCUN1D1	28,305	0.196523	1.14593	0.059741	1.22373	0.121624	1.08796	0.231136	0.636132	0.13074	1.09486	0.199264	0.70057	0.503711	1.41786	5.19567e-05	4.28436	0.454492	1.3703	0.000165285	3.78177	-0.0748984	0.949409	0.541659	0.266274	-0.0657831	0.955427	0.59154	0.228016	0.307188	1.23729	0.0191678	1.71743	0.257969	1.19579	0.0449296	1.34747	0.00911538	1.00634	0.940515	0.0266345	0.382086	1.30322	0.00481798	2.31713	0.332867
C9JVY5	PALM2 and AKAP2 fusion (Fragment)	PALM2AKAP2	PALM2AKAP2	85,283	-0.28257	0.822125	0.00903583	2.04403	-0.237853	0.848006	0.0244818	1.61116	-0.375672	0.770746	0.00101102	2.99524	-0.216	0.860949	0.0389796	1.40916	-0.18848	0.87753	0.0682164	1.16611	0.0447167	1.03148	0.712839	0.147009	-0.0931024	0.937505	0.446081	0.350586	0.0665698	1.04722	0.584534	0.23319	0.0940902	1.06739	0.441342	0.355225	-0.137819	0.908892	0.263431	0.579333	0.0218531	1.01526	0.857074	0.0669817	0.0493735
C9JW69	Regulator of chromosome condensation (Fragment)	RCC1	RCC1	39,584	-0.0771169	0.94795	0.193264	0.713849	-0.0404308	0.972365	0.48847	0.311162	-0.0841243	0.943357	0.157472	0.802797	0.118085	1.08529	0.0524531	1.28023	0.0267161	1.01869	0.646001	0.189767	0.0366861	1.02575	0.606804	0.216952	-0.00700741	0.995155	0.92144	0.0355332	0.195202	1.14488	0.0114644	1.94065	0.103833	1.07462	0.154421	0.811293	-0.0436935	0.970168	0.54048	0.267221	0.158516	1.11614	0.0351279	1.45435	0.0671469
C9JYN0	Synaptophysin-like protein 1	SYPL1	SYPL1	24,784	-0.190304	0.876421	0.0571546	1.24295	0.175061	1.12901	0.0781443	1.1071	0.15402	1.11267	0.118019	0.928048	-0.22002	0.858554	0.0301492	1.52072	-0.0613098	0.958394	0.52302	0.281481	0.365366	1.28821	0.0048658	2.31285	0.344324	1.26956	0.00735416	2.13347	-0.0297153	0.979614	0.799604	0.0971252	0.128994	1.09353	0.277282	0.557079	-0.0210418	0.985521	0.857282	0.0668762	-0.395081	0.760447	0.00269369	2.56965	-0.236371
C9JZI1	Replication factor C subunit 4	RFC4	RFC4	36,878	-0.157528	0.89656	0.144392	0.840456	0.100103	1.07185	0.345964	0.46097	-0.231728	0.851614	0.0369828	1.432	0.338025	1.26402	0.00390691	2.40817	0.113266	1.08167	0.287745	0.540993	0.257631	1.19551	0.0560065	1.25176	-0.0742	0.949869	0.565657	0.247446	0.495553	1.40986	0.0008785	3.05626	0.270794	1.20647	0.0455496	1.34152	-0.331831	0.794528	0.016632	1.77906	0.237922	1.17929	0.0756897	1.12096	0.0131632
C9JZR2	Catenin delta-1	CTNND1	CTNND1	104,849	0.079625	1.05674	0.402489	0.395246	0.0790194	1.0563	0.406015	0.391458	0.294466	1.22643	0.00486732	2.31271	-0.195297	0.873393	0.048765	1.31189	-0.113553	0.924309	0.2367	0.625801	-0.000605559	0.99958	0.995815	0.00182132	0.214841	1.16058	0.074078	1.13031	-0.274922	0.826495	0.0255819	1.59207	-0.193178	0.874677	0.105661	0.976086	0.215447	1.16106	0.0733289	1.13472	-0.274317	0.826842	0.0258702	1.5872	-0.192572
D3YTB1	60S ribosomal protein L32 (Fragment)	RPL32	RPL32	15,617	-0.050212	0.965794	0.275713	0.559543	-0.132996	0.911936	0.00757338	2.12071	-0.204387	0.867907	0.000187211	3.72767	-0.0797401	0.946228	0.090289	1.04437	-0.151116	0.900554	0.0030104	2.52138	-0.0827835	0.944234	0.14702	0.832625	-0.154175	0.898646	0.010796	1.96674	-0.029528	0.979741	0.596483	0.224402	-0.100904	0.932449	0.0808036	1.09257	-0.0713914	0.95172	0.208049	0.681835	0.0532554	1.0376	0.343416	0.464179	-0.0181205
D6R938	Calcium/calmodulin-dependent protein kinase (CaM kinase) II delta, isoform CRA_e (Calcium/calmodulin-dependent protein kinase type II subunit delta)	CAMK2D hCG_22679	CAMK2D	56,298	0.0351808	1.02469	0.827923	0.0820101	0.0850643	1.06074	0.600238	0.221676	-0.33953	0.790299	0.0461329	1.33599	-0.085707	0.942323	0.597506	0.223658	-0.0994489	0.933389	0.540603	0.267121	0.0498834	1.03518	0.801351	0.0961771	-0.374711	0.77126	0.0698016	1.15613	-0.120888	0.919622	0.54361	0.264713	-0.13463	0.910904	0.499262	0.301672	-0.424594	0.745048	0.0421438	1.37527	-0.170771	0.888368	0.393074	0.405526	-0.184513
D6R9I4	Filamin-binding LIM protein 1 (Fragment)	FBLIM1	FBLIM1	3,411	-0.0750908	0.949282	0.706228	0.151055	-0.296785	0.814064	0.146311	0.834724	-0.240546	0.846425	0.234817	0.629271	-0.266159	0.831531	0.190387	0.720362	-0.367469	0.775141	0.0759618	1.1194	-0.221694	0.857558	0.367641	0.434577	-0.165455	0.891647	0.499413	0.30154	-0.191068	0.875957	0.436285	0.36023	-0.292378	0.816555	0.238253	0.622961	0.0562396	1.03975	0.817503	0.0875106	0.0306267	1.02146	0.89995	0.0457816	-0.0706834
D6R9P3	Heterogeneous nuclear ribonucleoprotein A/B	HNRNPAB	HNRNPAB	30,303	0.0306798	1.02149	0.462392	0.33499	0.0843998	1.06025	0.0524515	1.28024	0.0987077	1.07081	0.025609	1.59161	0.0764578	1.05443	0.0765164	1.11625	0.126925	1.09196	0.00562065	2.25021	0.05372	1.03794	0.296783	0.527561	0.0680279	1.04828	0.189984	0.721283	0.045778	1.03224	0.372162	0.429268	0.0962454	1.06899	0.069268	1.15947	0.0143079	1.00997	0.778337	0.108832	-0.00794204	0.99451	0.875752	0.057619	0.0425254
D6RBJ9	Deoxycytidylate deaminase (Fragment)	DCTD	DCTD	18,977	-0.149896	0.901316	0.286484	0.542899	0.151834	1.11098	0.280476	0.552104	0.0163249	1.01138	0.906263	0.0427457	0.215857	1.16139	0.130446	0.884568	0.0152048	1.01059	0.912666	0.0396883	0.301729	1.23262	0.0869435	1.06076	0.16622	1.12211	0.333281	0.47719	0.365753	1.28855	0.0411828	1.38528	0.1651	1.12124	0.336472	0.473051	-0.135509	0.910349	0.428431	0.368119	0.0640233	1.04538	0.70658	0.150839	-0.136629
D6RBV2	Vesicular integral-membrane protein VIP36	LMAN2	LMAN2	36,543	-0.208815	0.865248	0.0116493	1.9337	-0.0150685	0.98961	0.843314	0.0740106	-0.175873	0.885231	0.0298872	1.52451	-0.0743816	0.949749	0.334715	0.475325	-0.247427	0.842397	0.00365611	2.43698	0.193746	1.14373	0.0483403	1.31569	0.0329414	1.0231	0.72452	0.13995	0.134433	1.09766	0.160133	0.79552	-0.0386126	0.973591	0.679713	0.167675	-0.160805	0.894526	0.0963051	1.01635	-0.059313	0.959721	0.527163	0.278055	-0.232359
D6RC52	Ribonucloprotein (Fragment)	NHP2	NHP2	15,018	0.180379	1.13318	0.0788228	1.10335	0.236879	1.17844	0.0244976	1.61088	0.223154	1.16728	0.0329106	1.48266	0.180268	1.13309	0.0789931	1.10241	0.222333	1.16662	0.03349	1.47508	0.0565	1.03994	0.640931	0.193189	0.0427754	1.03009	0.7237	0.140442	-0.000110769	0.999923	0.999268	0.000317841	0.0419543	1.02951	0.728777	0.137405	-0.0137246	0.990532	0.909564	0.0411668	-0.0566108	0.96152	0.64028	0.19363	-0.0145457
D6REA1	Nucleotide exchange factor SIL1	SIL1	SIL1	52,748	0.238767	1.17998	0.670234	0.173773	0.506585	1.42068	0.370073	0.431712	-0.44067	0.736793	0.434436	0.362074	0.589899	1.50514	0.298319	0.525319	0.158124	1.11584	0.777661	0.109209	0.267818	1.20399	0.696438	0.157118	-0.679437	0.624409	0.327276	0.485085	0.351132	1.27556	0.609497	0.215029	-0.0806435	0.945636	0.906321	0.0427181	-0.947255	0.518618	0.176794	0.752531	0.083314	1.05945	0.903235	0.0441994	-0.348462
D6REX3	Protein transport protein Sec31A	SEC31A	SEC31A	136,226	0.131788	1.09565	0.00170631	2.76794	0.0290277	1.02032	0.434958	0.361552	0.122041	1.08827	0.00317265	2.49858	-0.0194214	0.986628	0.599868	0.221945	0.0368579	1.02588	0.323769	0.489765	-0.10276	0.93125	0.032099	1.49351	-0.00974617	0.993267	0.829323	0.0812764	-0.151209	0.900496	0.00289969	2.53765	-0.0949296	0.936318	0.0459567	1.33765	0.0930137	1.0666	0.0500874	1.30027	-0.0484491	0.966975	0.290468	0.536902	0.00783023
D6RGI3	Septin 11, isoform CRA_b (Septin-11)	SEPTIN11 SEPT11 hCG_24410	SEPTIN11	49,006	0.127344	1.09228	0.0442456	1.35413	0.00278097	1.00193	0.963083	0.0163363	0.128816	1.0934	0.0420784	1.37594	-0.00147424	0.998979	0.980424	0.00858599	0.022468	1.0157	0.708927	0.149398	-0.124563	0.917282	0.101901	0.991819	0.00147178	1.00102	0.984043	0.00698612	-0.128818	0.91458	0.091452	1.03881	-0.104876	0.929885	0.164391	0.784123	0.126035	1.09129	0.0981769	1.00799	-0.00425521	0.997055	0.953888	0.0205026	0.019687
D6RHW1	Transcription initiation factor TFIID subunit 9 (Fragment)	TAF9	TAF9	11,570	-0.0524544	0.964294	0.712073	0.147475	0.0168719	1.01176	0.905358	0.0431799	-0.0137012	0.990548	0.923077	0.034762	-0.034322	0.976491	0.808988	0.0920577	0.0354591	1.02488	0.802799	0.0953934	0.0693263	1.04923	0.690511	0.16083	0.0387531	1.02723	0.82363	0.084268	0.0181323	1.01265	0.916904	0.0376763	0.0879134	1.06283	0.61405	0.211796	-0.0305732	0.979031	0.860392	0.0653038	-0.051194	0.965137	0.768535	0.114336	0.0185871
D6RIY6	Exosome complex component RRP45 (Exosome component 9, isoform CRA_f)	EXOSC9 hCG_38830	EXOSC9	46,978	-0.201909	0.8694	0.402505	0.395228	0.0338038	1.02371	0.887572	0.0517963	0.0854145	1.06099	0.721286	0.141892	-0.141465	0.906598	0.555732	0.255134	-0.0357045	0.975555	0.8813	0.0548763	0.235712	1.17749	0.424514	0.372108	0.287323	1.22037	0.332184	0.478621	0.0604433	1.04279	0.836523	0.0775222	0.166204	1.1221	0.571802	0.242754	0.0516107	1.03642	0.860124	0.0654387	-0.175269	0.885602	0.551197	0.258693	-0.0695084
E5RGN3	Copper transport protein ATOX1	ATOX1	ATOX1	6,330	0.0566368	1.04004	0.226622	0.644698	0.19627	1.14573	0.000327064	3.48537	0.0427358	1.03007	0.357798	0.446362	0.224811	1.16862	7.5645e-05	4.12122	0.231025	1.17367	5.5183e-05	4.25819	0.139633	1.10162	0.020693	1.68418	-0.013901	0.990411	0.805158	0.0941191	0.168175	1.12364	0.0066718	2.17576	0.174388	1.12849	0.00517788	2.28585	-0.153534	0.899046	0.0120141	1.92031	0.0285419	1.01998	0.613392	0.212262	0.0347553
E5RHF4	39S ribosomal protein L15, mitochondrial (Fragment)	MRPL15	MRPL15	21,943	-0.0908178	0.93899	0.434332	0.362178	0.123997	1.08975	0.288941	0.539191	-0.119884	0.920261	0.304792	0.515996	-0.0542839	0.963072	0.63862	0.194757	-0.00296773	0.997945	0.979459	0.00901356	0.214815	1.16055	0.138973	0.85707	-0.0290665	0.980054	0.836959	0.0772957	0.0365339	1.02565	0.795965	0.0991058	0.08785	1.06279	0.535738	0.271048	-0.243881	0.84447	0.0955023	1.01999	-0.178281	0.883755	0.215569	0.666413	-0.126965
E5RIW3	Tubulin-specific chaperone A	TBCA	TBCA	10,080	-0.0130365	0.991004	0.84219	0.07459	-0.0504343	0.965646	0.444327	0.352297	-0.158934	0.895686	0.0231182	1.63605	0.323783	1.25161	6.61239e-05	4.17964	0.195433	1.14507	0.00667918	2.17528	-0.0373978	0.974411	0.641727	0.19265	-0.145898	0.903817	0.0801197	1.09626	0.33682	1.26297	0.000383281	3.41648	0.20847	1.15546	0.0158818	1.7991	-0.1085	0.927552	0.185615	0.731387	0.374218	1.29614	0.000127099	3.89586	0.245867
E5RJ09	Erlin-2 (Fragment)	ERLIN2	ERLIN2	22,316	-0.127434	0.915458	0.577241	0.238643	0.378446	1.29994	0.107885	0.96704	0.0748721	1.05327	0.742648	0.129217	0.27733	1.21195	0.231747	0.634985	0.238415	1.1797	0.301668	0.520471	0.50588	1.41999	0.081092	1.09102	0.202306	1.15054	0.471143	0.326847	0.404764	1.32387	0.157167	0.803638	0.36585	1.28864	0.198983	0.701184	-0.303574	0.810243	0.283425	0.547562	-0.101116	0.932312	0.717382	0.14425	-0.14003
E7EMB1	Switch-associated protein 70	SWAP70	SWAP70	62,033	-0.250817	0.84042	0.124623	0.9044	-0.10529	0.929618	0.508783	0.293467	0.0604384	1.04278	0.703438	0.152774	0.138529	1.10078	0.386564	0.412778	-0.12095	0.919582	0.448641	0.348101	0.145528	1.10614	0.456548	0.340514	0.311256	1.24079	0.119993	0.920843	0.389347	1.3098	0.0556625	1.25444	0.129867	1.09419	0.505817	0.296007	0.165728	1.12173	0.397471	0.400694	0.243819	1.18412	0.217899	0.661746	-0.0156607
E7EPA1	Phosphoribosyl pyrophosphate synthase-associated protein 2 (Fragment)	PRPSAP2	PRPSAP2	29,642	-0.0344549	0.976401	0.794785	0.0997504	-0.138211	0.908645	0.302897	0.518705	-0.194597	0.873817	0.152082	0.817923	-0.157998	0.896268	0.240796	0.618351	-0.385007	0.765776	0.00796514	2.09881	-0.103756	0.930607	0.524259	0.280454	-0.160142	0.894937	0.329055	0.482731	-0.123543	0.91793	0.449276	0.347487	-0.350552	0.784284	0.0405007	1.39254	-0.0563853	0.961671	0.728356	0.137656	-0.0197869	0.986378	0.902864	0.0443775	-0.246795
E7EPN9	Protein PRRC2C	PRRC2C	PRRC2C	308,777	-0.0313307	0.978517	0.580634	0.236097	-0.0591563	0.959825	0.301592	0.52058	0.0802356	1.05719	0.16579	0.780442	-0.28685	0.81969	4.87999e-05	4.31158	-0.0506512	0.9655	0.374721	0.426292	-0.0278256	0.980898	0.688162	0.16231	0.111566	1.0804	0.118091	0.927783	-0.25552	0.837685	0.00128222	2.89204	-0.0193205	0.986697	0.780268	0.107756	0.139392	1.10144	0.0547092	1.26194	-0.227694	0.853999	0.00330147	2.48129	0.00850508
E7EPT4	NADH dehydrogenase [ubiquinone] flavoprotein 2, mitochondrial	NDUFV2	NDUFV2	27,907	0.185578	1.13727	0.019545	1.70896	0.077132	1.05492	0.304107	0.516974	0.117202	1.08463	0.124634	0.904364	-0.0605843	0.958876	0.41719	0.379666	0.0747165	1.05315	0.319108	0.496062	-0.108446	0.927587	0.240056	0.619687	-0.0683756	0.953711	0.454128	0.342822	-0.246162	0.843136	0.0123531	1.90823	-0.110861	0.926035	0.230104	0.638076	0.0400701	1.02816	0.659415	0.180841	-0.137716	0.908957	0.139766	0.8546	-0.00241549
E7EQ61	Ubiquitin-like modifier-activating enzyme 5	UBA5	UBA5	41,851	-0.10938	0.926986	0.168932	0.772289	0.0544507	1.03846	0.485642	0.313684	-0.0446174	0.969547	0.566989	0.246425	-0.148315	0.902304	0.0671876	1.17271	-0.191709	0.875568	0.0211303	1.67509	0.163831	1.12026	0.0962233	1.01672	0.0647625	1.04591	0.498178	0.302615	-0.0389351	0.973373	0.68273	0.165751	-0.0823287	0.944532	0.390867	0.407971	-0.0990681	0.933636	0.303817	0.517387	-0.202766	0.868883	0.0430276	1.36625	-0.246159
E7EQ69	N-alpha-acetyltransferase 50	NAA50	NAA50	19,311	0.0452124	1.03184	0.519815	0.284152	-0.0108305	0.992521	0.876863	0.0570681	-0.0892823	0.93999	0.210431	0.676891	0.113652	1.08196	0.11513	0.938812	0.106066	1.07629	0.139901	0.854178	-0.0560429	0.961899	0.514835	0.288332	-0.134495	0.910989	0.127157	0.895661	0.0684398	1.04858	0.427586	0.368976	0.0608537	1.04308	0.479837	0.318906	-0.0784518	0.947073	0.364332	0.438503	0.124483	1.09012	0.156293	0.806059	0.116897
E7ERH2	S-phase kinase-associated protein 1 (Fragment)	SKP1	SKP1	16,034	0.0863913	1.06171	0.129822	0.886652	-0.163526	0.89284	0.00720823	2.14217	-0.0716752	0.951532	0.204818	0.688632	0.185565	1.13726	0.00287101	2.54197	0.109515	1.07887	0.0589225	1.22972	-0.249917	0.840945	0.00130817	2.88334	-0.158067	0.896225	0.028506	1.54506	0.0991737	1.07116	0.154245	0.81179	0.0231234	1.01616	0.733543	0.134575	0.0918509	1.06574	0.185436	0.731806	0.349091	1.27376	4.15725e-05	4.38119	0.273041
E7ERI8	CLIP-associating protein 2	CLASP2	CLASP2	165,628	0.0119547	1.00832	0.942435	0.0257486	-0.0594961	0.959599	0.719736	0.142827	0.00194091	1.00135	0.990645	0.00408174	-0.0786312	0.946956	0.635759	0.196707	0.174843	1.12884	0.297563	0.526422	-0.0714508	0.95168	0.724945	0.139695	-0.0100138	0.993083	0.96061	0.017453	-0.0905859	0.939141	0.65584	0.183202	0.162888	1.11953	0.425488	0.371113	0.061437	1.0435	0.762143	0.117964	-0.0191351	0.986824	0.924817	0.0339441	0.234339
E7ERS3	Zinc finger CCCH domain-containing protein 18	ZC3H18	ZC3H18	108,940	-0.0983747	0.934085	0.817407	0.0875618	-0.0692572	0.953129	0.870834	0.0600647	0.05675	1.04012	0.893996	0.0486646	-0.813489	0.569004	0.067249	1.17231	0.064299	1.04558	0.880003	0.055516	0.0291175	1.02039	0.955475	0.0197807	0.155125	1.11352	0.766366	0.115564	-0.715114	0.609157	0.180185	0.744281	0.162674	1.11936	0.755378	0.121836	0.126007	1.09127	0.809206	0.0919409	-0.744232	0.596986	0.163861	0.785525	0.133556
E7ES08	High mobility group protein B3 (Fragment)	HMGB3	HMGB3	21,445	-0.0794633	0.94641	0.412086	0.385012	0.0199019	1.01389	0.835946	0.0778216	-0.0908252	0.938986	0.349738	0.456257	0.00971084	1.00675	0.919484	0.036456	-0.0818361	0.944854	0.398508	0.399563	0.0993651	1.0713	0.40251	0.395223	-0.0113619	0.992155	0.923069	0.034766	0.0891741	1.06376	0.451705	0.345145	-0.00237283	0.998357	0.983908	0.00704554	-0.110727	0.926121	0.351906	0.453573	-0.010191	0.992961	0.930974	0.0310624	-0.101738
E7ES33	Septin-7	SEPTIN7	SEPTIN7	48,716	0.0433784	1.03052	0.408022	0.389316	-0.0601609	0.959157	0.254895	0.593639	0.164275	1.1206	0.00446877	2.34981	-0.124843	0.917104	0.0244699	1.61137	-0.0982477	0.934167	0.0699581	1.15516	-0.103539	0.930747	0.115108	0.938894	0.120897	1.08741	0.0687496	1.16273	-0.168221	0.889939	0.0144792	1.83925	-0.141626	0.906497	0.0355921	1.44865	0.224436	1.16832	0.00190335	2.72048	-0.064682	0.956156	0.315769	0.500631	-0.0380868
E7ESC6	Exportin-7	XPO7	XPO7	124,067	-0.0444659	0.969649	0.71648	0.144796	-0.153201	0.899253	0.218921	0.659712	-0.0277465	0.980951	0.820543	0.0858987	-0.0444646	0.96965	0.716487	0.144792	-0.0664112	0.955011	0.588305	0.230397	-0.108735	0.927401	0.470579	0.327367	0.0167193	1.01166	0.91109	0.0404387	1.2682e-06	1	0.999993	2.93546e-06	-0.0219453	0.984904	0.883488	0.0537996	0.125455	1.09085	0.406151	0.391313	0.108736	1.07828	0.470574	0.327372	0.0867899
E7ETK0	40S ribosomal protein S24	RPS24	RPS24	15,197	-0.0899712	0.939542	0.0586863	1.23146	-0.108753	0.927389	0.0249606	1.60275	-0.11226	0.925138	0.0211385	1.67493	-0.134267	0.911133	0.00718642	2.14349	-0.180546	0.882369	0.000661357	3.17956	-0.0187816	0.987066	0.736182	0.133015	-0.0222891	0.984669	0.689453	0.161495	-0.044296	0.969763	0.42984	0.366694	-0.0905753	0.939148	0.114991	0.939338	-0.00350746	0.997572	0.949762	0.0223853	-0.0255143	0.98247	0.647575	0.18871	-0.0717936
E7ETZ4	Basic leucine zipper and W2 domain-containing protein 2 (Fragment)	BZW2	BZW2	46,913	-0.242225	0.84544	5.21155e-05	4.28303	-0.16898	0.889472	0.00191795	2.71716	-0.248949	0.841509	3.76496e-05	4.42424	-0.0960602	0.935584	0.0560613	1.25134	-0.247382	0.842423	4.06065e-05	4.3914	0.0732458	1.05208	0.221283	0.655052	-0.00672391	0.99535	0.908899	0.0414842	0.146165	1.10662	0.0203329	1.6918	-0.00515702	0.996432	0.930061	0.0314884	-0.0799697	0.946078	0.183288	0.736866	0.0729195	1.05184	0.223271	0.651168	-0.0784028
E7EVA0	Microtubule-associated protein	MAP4	MAP4	245,444	0.310408	1.24006	7.33371e-06	5.13468	-0.106564	0.928798	0.0532156	1.27396	0.318444	1.24699	5.21898e-06	5.28241	-0.199525	0.870837	0.00100013	2.99994	0.00690252	1.0048	0.895489	0.0479399	-0.416972	0.748995	2.08737e-06	5.6804	0.00803619	1.00559	0.900622	0.0454574	-0.509933	0.702255	1.06311e-07	6.97342	-0.303505	0.810281	0.000113391	3.94542	0.425008	1.34258	1.59558e-06	5.79708	-0.0929614	0.937596	0.158943	0.798757	0.113467
E7EVE9	General transcription and DNA repair factor IIH helicase subunit XPD	ERCC2	ERCC2	77,922	0.0272754	1.01909	0.92524	0.0337458	0.0662545	1.04699	0.819793	0.0862959	-0.517215	0.698719	0.0865752	1.06261	0.0135291	1.00942	0.962873	0.0164309	-0.076127	0.948601	0.793551	0.100425	0.0389792	1.02739	0.912815	0.0396171	-0.544491	0.685633	0.137022	0.863209	-0.0137462	0.990517	0.969196	0.0135884	-0.103402	0.930835	0.771679	0.112564	-0.58347	0.667357	0.112491	0.94888	-0.0527254	0.964113	0.882279	0.0543942	-0.142382
E7EVX8	U4/U6 small nuclear ribonucleoprotein Prp31	PRPF31	PRPF31	54,766	-0.0730308	0.950639	0.46196	0.335396	-0.0887783	0.940319	0.372736	0.428599	-0.0122814	0.991523	0.90089	0.0453283	-0.153611	0.898998	0.130286	0.885101	-0.134976	0.910685	0.180891	0.742582	-0.0157475	0.989144	0.896266	0.0475629	0.0607494	1.04301	0.616039	0.210392	-0.0805797	0.945678	0.506965	0.295022	-0.0619454	0.957971	0.609155	0.215272	0.0764969	1.05445	0.528502	0.276953	-0.0648322	0.956057	0.592693	0.22717	-0.0461979
E7EW05	Protein SDA1	SDAD1	SDAD1	75,441	-0.667681	0.629518	0.182693	0.738277	0.240958	1.18178	0.623839	0.204928	-0.551045	0.682526	0.268073	0.571747	0.281714	1.21564	0.566827	0.24655	-0.0312991	0.978539	0.949055	0.0227088	0.908639	1.87727	0.140719	0.851648	0.116637	1.0842	0.84592	0.0726707	0.949396	1.93106	0.124668	0.904244	0.636382	1.55443	0.295519	0.529414	-0.792002	0.577542	0.196246	0.707199	0.0407565	1.02865	0.945839	0.0241826	-0.272257
E7EW69	Septin-10	SEPTIN10	SEPTIN10	52,146	-0.0956117	0.935875	0.244804	0.611181	0.0388299	1.02728	0.631822	0.199405	0.0912147	1.06527	0.26646	0.574369	-0.212251	0.863189	0.0149958	1.82403	-0.250499	0.840605	0.00513941	2.28909	0.134442	1.09767	0.184091	0.734967	0.186826	1.13826	0.0702895	1.15311	-0.116639	0.922334	0.246602	0.608003	-0.154888	0.898202	0.128623	0.890682	0.0523848	1.03698	0.597858	0.223402	-0.251081	0.840267	0.0182611	1.73847	-0.289329
E7EWC2	Ras GTPase-activating-like protein IQGAP2 (Fragment)	IQGAP2	IQGAP2	160,334	-0.161796	0.893911	0.112477	0.948935	-0.0552222	0.962446	0.577339	0.238569	-0.00964668	0.993336	0.922153	0.0351971	-0.334361	0.793135	0.00263396	2.57939	-0.394764	0.760614	0.000620035	3.20758	0.106574	1.07667	0.382609	0.417244	0.15215	1.11122	0.21706	0.663419	-0.172565	0.887264	0.163757	0.7858	-0.232967	0.850883	0.0650881	1.1865	0.0455755	1.03209	0.706668	0.150784	-0.279139	0.824083	0.0298237	1.52544	-0.339542
E7EX17	Eukaryotic translation initiation factor 4B	EIF4B	EIF4B	69,698	-0.154065	0.898715	0.00193002	2.71444	-0.105114	0.929731	0.0244956	1.61091	-0.0677656	0.954115	0.13257	0.877554	-0.257755	0.836388	7.66571e-06	5.11545	-0.251177	0.840211	1.07419e-05	4.96892	0.048951	1.03451	0.36615	0.436341	0.0862994	1.06164	0.118659	0.925698	-0.10369	0.93065	0.0641845	1.19257	-0.0971115	0.934903	0.0814559	1.08908	0.0373484	1.02623	0.488637	0.311014	-0.152641	0.899602	0.00915736	2.03823	-0.146062
E7EX70	DNA-directed RNA polymerase I subunit RPA49	POLR1E	POLR1E	15,862	-0.309785	0.806762	0.0895307	1.04803	0.0710612	1.05049	0.686714	0.163224	-0.207661	0.86594	0.245672	0.609644	-0.345546	0.78701	0.0603727	1.21916	-0.0380033	0.974002	0.828979	0.0814565	0.380846	1.3021	0.0884061	1.05352	0.102123	1.07335	0.636293	0.196343	-0.0357613	0.975517	0.868151	0.0614047	0.271781	1.2073	0.215847	0.665855	-0.278722	0.824321	0.204792	0.688687	-0.416607	0.749185	0.0641411	1.19286	-0.109064
E7EX90	Dynactin subunit 1	DCTN1	DCTN1	139,094	0.0806041	1.05746	0.180307	0.743987	0.071089	1.05051	0.235028	0.628881	-0.0489316	0.966652	0.409349	0.387906	0.0608316	1.04307	0.307273	0.512476	0.154685	1.11318	0.0148643	1.82785	-0.00951511	0.993426	0.894902	0.0482246	-0.129536	0.914126	0.0834612	1.07852	-0.0197725	0.986388	0.783844	0.10577	0.0740804	1.05269	0.309955	0.508701	-0.120021	0.920174	0.106943	0.970849	-0.0102574	0.992915	0.88676	0.0521939	0.0835955
E9PCX7	NAD(P) transhydrogenase, mitochondrial	NNT	NNT	99,729	-0.140091	0.907462	0.427125	0.369445	0.187209	1.13856	0.291559	0.535274	0.0340362	1.02387	0.845864	0.0726994	-0.136734	0.909576	0.438113	0.358414	-0.156784	0.897022	0.37509	0.425865	0.3273	1.25466	0.137648	0.861229	0.174127	1.12828	0.420393	0.376345	0.00335677	1.00233	0.987504	0.00546094	-0.0166931	0.988496	0.937925	0.0278319	-0.153173	0.89927	0.477648	0.320892	-0.323944	0.798883	0.141511	0.84921	-0.343993
E9PDF2	2-oxoglutarate dehydrogenase, mitochondrial	OGDH	OGDH	117,244	-0.0850762	0.942735	0.306036	0.514228	0.0434543	1.03058	0.597525	0.223644	0.052746	1.03724	0.522308	0.282073	0.0103413	1.00719	0.89968	0.0459119	0.126471	1.09162	0.134036	0.872777	0.12853	1.09318	0.209788	0.678219	0.137822	1.10024	0.179945	0.74486	0.0954175	1.06837	0.347568	0.458961	0.211548	1.15793	0.0454797	1.34218	0.00929165	1.00646	0.926307	0.0332452	-0.033113	0.977309	0.742003	0.129594	0.083017
E9PDF6	Unconventional myosin-Ib	MYO1B	MYO1B	128,481	0.0407658	1.02866	0.732205	0.135367	0.159524	1.11692	0.189553	0.72227	0.141444	1.10301	0.242591	0.615126	0.321594	1.24971	0.0126496	1.89792	0.149609	1.10927	0.217383	0.662775	0.118759	1.0858	0.418855	0.377936	0.100678	1.07228	0.492133	0.307917	0.280828	1.21489	0.0650326	1.18687	0.108843	1.07836	0.458157	0.338986	-0.0180805	0.987546	0.901252	0.0451538	0.16207	1.11889	0.273273	0.563403	-0.00991568
E9PE17	28S ribosomal protein S17, mitochondrial (Fragment)	MRPS17	MRPS17	14,374	-0.191311	0.875809	0.144324	0.840661	0.0876415	1.06263	0.494478	0.305853	-0.0680145	0.95395	0.595108	0.225404	0.0535902	1.03784	0.674991	0.170702	0.144415	1.10528	0.264988	0.576774	0.278953	1.21331	0.0855121	1.06797	0.123297	1.08922	0.433445	0.363066	0.244901	1.18501	0.127953	0.892949	0.335726	1.26201	0.041599	1.38092	-0.155656	0.897724	0.324911	0.488235	-0.0340513	0.976674	0.827513	0.0822254	0.0567732
E9PFH4	Transportin-3	TNPO3	TNPO3	96,670	-0.0565172	0.961583	0.469235	0.32861	-0.129988	0.913839	0.105186	0.978043	0.051333	1.03622	0.510475	0.292025	-0.263118	0.833285	0.00260761	2.58376	-0.139629	0.907752	0.0832827	1.07945	-0.0734709	0.950349	0.442761	0.353831	0.10785	1.07762	0.263889	0.578579	-0.206601	0.866577	0.0395123	1.40327	-0.083112	0.944019	0.386232	0.413152	0.181321	1.13392	0.067519	1.17057	-0.13313	0.911851	0.171274	0.76631	-0.00964112
E9PG73	Peptidyl-prolyl cis-trans isomerase G	PPIG	PPIG	87,089	0.0216058	1.01509	0.872084	0.0594417	0.0686498	1.04873	0.609998	0.214672	-0.0292491	0.97993	0.827497	0.0822335	0.111782	1.08056	0.408747	0.388546	-0.129367	0.914232	0.340436	0.467964	0.047044	1.03315	0.774842	0.110787	-0.0508549	0.965364	0.757195	0.120792	0.090176	1.0645	0.584517	0.233203	-0.150973	0.900643	0.363183	0.439875	-0.0978989	0.934393	0.553028	0.257253	0.043132	1.03035	0.793087	0.100679	-0.198017
E9PGC8	Microtubule-associated protein 1A	MAP1A	MAP1A	331,258	0.431536	1.34867	0.000412737	3.38433	-0.158676	0.895847	0.136056	0.866282	0.0959492	1.06877	0.358886	0.445043	0.661691	1.58194	2.51064e-06	5.60022	0.369752	1.29213	0.00169998	2.76956	-0.590211	0.664246	0.000130411	3.88469	-0.335586	0.792462	0.0142999	1.84467	0.230155	1.17296	0.0807186	1.09303	-0.0617834	0.958079	0.626888	0.20281	0.254625	1.19303	0.0552898	1.25735	0.820367	1.76585	2.11753e-06	5.67417	0.528428
E9PGT1	Translin	TSN	TSN	25,572	-0.0139181	0.990399	0.841879	0.0747505	0.0394285	1.02771	0.573333	0.241593	-0.0361494	0.975254	0.605404	0.217954	-0.0252378	0.982659	0.717859	0.143961	-0.056726	0.961443	0.419798	0.37696	0.0533466	1.03767	0.534223	0.272278	-0.0222313	0.984709	0.794801	0.0997413	-0.0113197	0.992185	0.89458	0.048381	-0.0428079	0.970764	0.617322	0.209488	-0.0755778	0.948962	0.38085	0.419246	-0.0646663	0.956166	0.4522	0.34467	-0.0961545
E9PGZ1	Caldesmon	CALD1	CALD1	61,706	0.400641	1.32009	1.09736e-05	4.95965	0.0660555	1.04685	0.350225	0.455653	0.349975	1.27454	5.78494e-05	4.2377	-0.0748652	0.949431	0.291208	0.535797	0.244119	1.18437	0.00206645	2.68478	-0.334586	0.793012	0.000773117	3.11175	-0.0506659	0.965491	0.555885	0.255015	-0.475506	0.719214	1.63938e-05	4.78532	-0.156522	0.897186	0.079	1.10237	0.28392	1.2175	0.00312119	2.50568	-0.140921	0.90694	0.111219	0.95382	0.178064
E9PH82	Protein FAM98A	FAM98A	FAM98A	34,431	-0.0129029	0.991096	0.864547	0.0632115	0.0318458	1.02232	0.674305	0.171144	-0.0297697	0.979577	0.694349	0.158422	0.0542153	1.03829	0.476194	0.322216	0.0859913	1.06142	0.263014	0.580021	0.0447487	1.0315	0.629937	0.200703	-0.0168668	0.988377	0.855531	0.0677644	0.0671182	1.04762	0.471498	0.32652	0.0988942	1.07095	0.292354	0.53409	-0.0616155	0.958191	0.50817	0.293991	0.0223695	1.01563	0.809255	0.0919147	0.0541455
E9PHA2	Condensin complex subunit 2	NCAPH	NCAPH	81,573	-0.523135	0.695858	2.40934e-07	6.6181	-0.151034	0.900605	0.0399317	1.39868	-0.593323	0.662815	3.37704e-08	7.47146	-0.161851	0.893878	0.0288485	1.53988	-0.394083	0.760973	1.28114e-05	4.8924	0.372101	1.29424	0.000261042	3.58329	-0.0701875	0.952514	0.414374	0.382608	0.361285	1.28457	0.000352654	3.45265	0.129052	1.09357	0.140982	0.850835	-0.442289	0.735966	3.78602e-05	4.42182	-0.0108166	0.992531	0.899074	0.0462047	-0.243049
E9PHM6	Dystonin	DST	DST	629,787	-0.0233988	0.983912	0.824727	0.0836901	-0.115753	0.9229	0.280092	0.552699	-0.0662925	0.955089	0.532139	0.273975	-0.109019	0.927219	0.30823	0.511125	-0.183536	0.880542	0.0936047	1.0287	-0.0923546	0.937991	0.477941	0.320626	-0.0428937	0.970706	0.740468	0.130494	-0.0856198	0.94238	0.510244	0.292222	-0.160137	0.89494	0.224281	0.649207	0.0494609	1.03488	0.70263	0.153273	0.00673474	1.00468	0.958467	0.0184229	-0.0677828
E9PID8	Cleavage stimulation factor subunit 2	CSTF2	CSTF2	46,666	0.103703	1.07453	0.288542	0.539792	-0.0270103	0.981452	0.779363	0.10826	0.271966	1.20745	0.00966301	2.01489	-0.286471	0.819905	0.0068638	2.16344	-0.174965	0.885789	0.0806831	1.09322	-0.130713	0.91338	0.27511	0.560494	0.168263	1.1237	0.164071	0.784967	-0.390174	0.763038	0.00317602	2.49812	-0.278668	0.824352	0.0266394	1.57448	0.298976	1.23027	0.0183708	1.73587	-0.259461	0.8354	0.0375249	1.42568	-0.147955
E9PIE3	Caveolae-associated protein 3	CAVIN3	CAVIN3	31,088	-0.0359632	0.97538	0.897629	0.0469033	-0.160084	0.894973	0.568368	0.24537	0.0757708	1.05392	0.786489	0.104308	-0.422715	0.746019	0.141222	0.850099	-0.742736	0.597605	0.0140064	1.85367	-0.124121	0.917563	0.717329	0.144282	0.111734	1.08053	0.744422	0.128181	-0.386752	0.76485	0.266025	0.575077	-0.706772	0.612689	0.049445	1.30588	0.235855	1.1776	0.493355	0.30684	-0.262631	0.833567	0.446258	0.350414	-0.582651
E9PIY1	Protein kinase C and casein kinase substrate in neurons protein 3	PACSIN3	PACSIN3	37,214	-0.0743919	0.949742	0.665822	0.176642	-0.0177611	0.987764	0.91769	0.0373042	0.185196	1.13697	0.288083	0.540482	-0.0240491	0.983469	0.888727	0.0512317	0.093912	1.06726	0.586128	0.232007	0.0566307	1.04003	0.788058	0.103442	0.259587	1.19714	0.226056	0.645784	0.0503428	1.03551	0.811082	0.090935	0.168304	1.12374	0.427591	0.368972	0.202957	1.15105	0.34046	0.467934	-0.00628793	0.995651	0.976165	0.0104766	0.111673
E9PKG1	Protein arginine N-methyltransferase 1	PRMT1	PRMT1	37,709	-0.171612	0.88785	0.00343427	2.46417	-0.0943144	0.936717	0.0833808	1.07893	-0.168938	0.889497	0.00386737	2.41258	-0.228108	0.853754	0.000268692	3.57075	-0.219035	0.85914	0.000405105	3.39243	0.0772979	1.05504	0.236894	0.625446	0.00267469	1.00186	0.966767	0.014678	-0.0564954	0.961597	0.383441	0.416301	-0.0474227	0.967663	0.463148	0.33428	-0.0746233	0.94959	0.252952	0.596961	-0.133793	0.911432	0.0475569	1.32279	-0.124721
E9PKG6	Nucleobindin-2	NUCB2	NUCB2	40,369	0.330313	1.25729	0.0205527	1.68713	0.113796	1.08207	0.396661	0.40158	0.205132	1.15279	0.134067	0.872679	0.627407	1.54479	0.00011368	3.94432	0.516523	1.4305	0.000818392	3.08704	-0.216517	0.860641	0.193443	0.713446	-0.125181	0.916889	0.445685	0.350972	0.297094	1.22867	0.0796292	1.09893	0.186209	1.13777	0.260773	0.583738	0.0913353	1.06536	0.576607	0.23912	0.513611	1.42762	0.00455717	2.3413	0.402726
E9PKP7	Nucleolar transcription factor 1	UBTF	UBTF	87,436	-0.0678912	0.954031	0.545519	0.26319	0.0478224	1.0337	0.66953	0.17423	-0.00829856	0.994264	0.94083	0.026489	0.186945	1.13835	0.105849	0.975313	0.130226	1.09447	0.251972	0.598648	0.115714	1.08351	0.402237	0.395518	0.0595926	1.04217	0.664137	0.177742	0.254836	1.1932	0.0740221	1.13064	0.198118	1.1472	0.158349	0.800386	-0.056121	0.961847	0.682523	0.165883	0.139123	1.10124	0.315776	0.500621	0.082404
E9PKS9	Trafficking protein particle complex subunit	TRAPPC4	TRAPPC4	14,150	0.0352817	1.02476	0.784565	0.105371	0.0635254	1.04502	0.6233	0.205303	0.151767	1.11093	0.247216	0.606923	0.152204	1.11127	0.245903	0.609237	0.0886948	1.06341	0.494091	0.306193	0.0282437	1.01977	0.858109	0.0664573	0.116485	1.08409	0.463783	0.333685	0.116923	1.08442	0.46213	0.335236	0.0534131	1.03772	0.735551	0.133387	0.0882417	1.06307	0.577802	0.238221	0.0886789	1.0634	0.575934	0.239627	0.0251694
E9PL57	NEDD8-MDP1 readthrough (Fragment)	NEDD8-MDP1	NEDD8-MDP1	19,536	0.00619898	1.00431	0.930079	0.0314802	0.108374	1.07801	0.135927	0.866693	0.0318478	1.02232	0.652935	0.18513	0.0438383	1.03085	0.536848	0.270148	0.0920044	1.06585	0.202077	0.694484	0.102175	1.07339	0.245694	0.609606	0.0256488	1.01794	0.767129	0.115132	0.0376393	1.02643	0.664277	0.177651	0.0858054	1.06128	0.327216	0.485166	-0.0765263	0.948338	0.381063	0.419003	-0.0645358	0.956253	0.458842	0.338336	-0.0163697
E9PLH9	GDP-L-fucose synthase (Fragment)	TSTA3	TSTA3	12,788	-0.0135804	0.990631	0.868114	0.0614233	0.15298	1.11186	0.0726066	1.13902	0.197107	1.1464	0.0240041	1.61971	-0.299887	0.812316	0.00136017	2.86641	-0.0985506	0.933971	0.23638	0.626389	0.16656	1.12238	0.10758	0.96827	0.210687	1.15724	0.0456542	1.34052	-0.286307	0.819998	0.00891232	2.05001	-0.0849701	0.942804	0.40034	0.397571	0.0441272	1.03106	0.660207	0.18032	-0.452867	0.73059	0.000179258	3.74652	-0.25153
E9PLK3	Aminopeptidase (EC 3.4.11.-)	NPEPPS	NPEPPS	102,988	0.169773	1.12488	0.000363184	3.43987	-0.0155266	0.989296	0.699758	0.155052	0.0311134	1.0218	0.442212	0.354369	0.148375	1.10832	0.00128472	2.89119	0.0503656	1.03553	0.218922	0.659711	-0.1853	0.879466	0.00108155	2.96595	-0.13866	0.908363	0.00980077	2.00874	-0.0213983	0.985277	0.664476	0.177521	-0.119407	0.920566	0.0232324	1.63391	0.04664	1.03286	0.348698	0.45755	0.163901	1.12031	0.00301216	2.52112	0.0658922
E9PLL6	60S ribosomal protein L27a	RPL27A	RPL27A	12,201	-0.0747334	0.949518	0.30576	0.514619	-0.0706002	0.952242	0.332605	0.478071	-0.174412	0.886129	0.0234261	1.6303	-0.056733	0.961439	0.434312	0.362198	-0.154493	0.898448	0.0419362	1.37741	0.00413324	1.00287	0.962618	0.0165462	-0.0996781	0.933241	0.265862	0.575343	0.0180004	1.01256	0.838342	0.0765789	-0.0797591	0.946216	0.370636	0.431052	-0.103811	0.930571	0.24716	0.607022	0.0138672	1.00966	0.875085	0.0579499	-0.0838924
E9PM92	Chromosome 11 open reading frame 58	C11orf58	C11orf58	17,635	0.319101	1.24755	0.000870784	3.06009	0.262233	1.19933	0.00438204	2.35832	0.182845	1.13512	0.0367337	1.43494	0.834718	1.78351	2.07555e-09	8.68287	0.693919	1.61767	4.36895e-08	7.35962	-0.0568677	0.961349	0.576213	0.239417	-0.136256	0.909877	0.188462	0.724776	0.515617	1.42961	4.76597e-05	4.32185	0.374818	1.29668	0.00126581	2.89763	-0.0793882	0.946459	0.436938	0.35958	0.572485	1.48708	1.31503e-05	4.88106	0.431686
E9PNR2	Ras and Rab interactor 1	RIN1	RIN1	66,546	-0.272891	0.827659	0.158179	0.800851	-0.246918	0.842695	0.199629	0.699777	-0.367077	0.775352	0.0625624	1.20369	-0.330351	0.795343	0.0911408	1.04029	-0.455602	0.729206	0.0237028	1.6252	0.0259736	1.01817	0.910442	0.0407478	-0.0941856	0.936801	0.683943	0.16498	-0.0574592	0.960955	0.80361	0.0949547	-0.18271	0.881046	0.43234	0.364174	-0.120159	0.920086	0.60399	0.21897	-0.0834328	0.943809	0.718267	0.143714	-0.208684
E9PPM8	Deoxyribose-phosphate aldolase	DERA	DERA	30,517	-0.0425233	0.970955	0.703546	0.152708	0.0550204	1.03887	0.622884	0.205593	-0.0300208	0.979406	0.788005	0.103471	-0.215522	0.861235	0.0644411	1.19084	-0.295436	0.814826	0.0142879	1.84503	0.0975437	1.06995	0.478021	0.320553	0.0125025	1.0087	0.927086	0.0328798	-0.172998	0.886997	0.214343	0.668891	-0.252912	0.839201	0.0754506	1.12234	-0.0850412	0.942758	0.535591	0.271166	-0.270542	0.829008	0.0585803	1.23225	-0.350456
E9PQH6	Rho-related GTP-binding protein RhoC (Fragment)	RHOC	RHOC	19,224	0.0858999	1.06135	0.42387	0.372767	0.168962	1.12425	0.123921	0.906856	0.32063	1.24888	0.00633243	2.19843	-0.0180656	0.987556	0.865402	0.062782	-0.0331307	0.977297	0.756117	0.121411	0.0830616	1.05926	0.526526	0.27858	0.23473	1.17669	0.0834526	1.07856	-0.103966	0.930472	0.429266	0.367273	-0.119031	0.920806	0.366635	0.435766	0.151668	1.11085	0.252988	0.596901	-0.187027	0.878414	0.162131	0.790135	-0.202092
E9PQX9	Dr1-associated corepressor	DRAP1	DRAP1	19,966	0.0314531	1.02204	0.84757	0.0718244	-0.157474	0.896593	0.341205	0.466985	0.0951491	1.06818	0.562397	0.249957	0.222165	1.16648	0.184146	0.734839	0.0186766	1.01303	0.909101	0.0413881	-0.188927	0.877258	0.350934	0.454774	0.063696	1.04514	0.750806	0.124472	0.190712	1.14133	0.346501	0.460295	-0.0127765	0.991183	0.949146	0.0226672	0.252623	1.19137	0.216172	0.6652	0.37964	1.30102	0.0692885	1.15934	0.176151
F2Z2X4	Exportin-4	XPO4	XPO4	130,153	0.16698	1.12271	0.547342	0.261741	-0.0521789	0.964479	0.850235	0.0704612	0.0617888	1.04376	0.823105	0.084545	-0.0910241	0.938856	0.742092	0.129542	0.248702	1.18814	0.372754	0.428577	-0.219159	0.859066	0.519302	0.28458	-0.105191	0.929682	0.756133	0.121402	-0.258004	0.836244	0.448979	0.347774	0.0817216	1.05828	0.809253	0.0919154	0.113968	1.0822	0.736567	0.132788	-0.0388452	0.973434	0.908598	0.041628	0.30088
F5GWE5	Phosphatidylinositol transfer protein alpha isoform	PITPNA	PITPNA	31,802	-0.0447459	0.969461	0.359166	0.444704	-0.119844	0.920287	0.0205776	1.6866	-0.0659923	0.955288	0.181525	0.741063	-0.0617328	0.958113	0.210101	0.677571	-0.0704515	0.95234	0.155024	0.809601	-0.0750984	0.949277	0.213065	0.671488	-0.0212463	0.985381	0.719796	0.142791	-0.0169869	0.988295	0.774126	0.111188	-0.0257056	0.98234	0.664509	0.177499	0.0538521	1.03803	0.367386	0.434877	0.0581116	1.0411	0.33152	0.47949	0.0493929
F5GWN1	Protein SSXT	SS18	SS18	4,387	-0.464002	0.724973	0.026832	1.57135	-0.0788023	0.946843	0.6893	0.161592	-0.0441251	0.969878	0.822616	0.0848027	-0.126904	0.915795	0.52101	0.283154	-0.15213	0.899921	0.442707	0.353884	0.3852	1.30604	0.121032	0.917101	0.419877	1.33781	0.0927945	1.03248	0.337098	1.26321	0.171849	0.764852	0.311872	1.24132	0.20471	0.688862	0.0346772	1.02433	0.885576	0.0527742	-0.0481014	0.967208	0.841821	0.0747801	-0.0733277
F5GY88	Mediator of RNA polymerase II transcription subunit 24	MED24	MED24	112,181	0.0267902	1.01874	0.833319	0.0791888	0.219885	1.16464	0.0953783	1.02055	0.0713043	1.05067	0.576692	0.239056	0.201897	1.15021	0.123698	0.907638	0.120271	1.08694	0.349865	0.456099	0.193095	1.14321	0.223975	0.6498	0.0445141	1.03134	0.775358	0.110498	0.175107	1.12905	0.268574	0.570937	0.0934811	1.06694	0.550372	0.259344	-0.148581	0.902137	0.345788	0.46119	-0.017988	0.987609	0.908114	0.0418597	-0.099614
F5GYN4	Ubiquitin thioesterase OTUB1	OTUB1	OTUB1	28,051	0.0943947	1.06762	0.0808507	1.09232	0.0357323	1.02508	0.494506	0.305828	0.0853826	1.06097	0.111881	0.951243	0.0233367	1.01631	0.654382	0.184169	0.0314353	1.02203	0.547304	0.261772	-0.0586623	0.960154	0.36203	0.441255	-0.00901202	0.993773	0.887489	0.051837	-0.0710579	0.95194	0.271853	0.565666	-0.0629594	0.957298	0.328701	0.483199	0.0496503	1.03501	0.439072	0.357464	-0.0123956	0.991445	0.845739	0.0727638	-0.00429704
F5GYT8	Methylcrotonoyl-CoA carboxylase subunit alpha, mitochondrial	MCCC1	MCCC1	64,007	0.556186	1.47038	0.0275197	1.56036	-0.134631	0.910903	0.57152	0.242969	-0.00604138	0.995821	0.979661	0.00892402	0.170527	1.12547	0.474647	0.32363	0.0521815	1.03683	0.825822	0.0831133	-0.690816	0.619503	0.0256398	1.59108	-0.562227	0.677256	0.0638214	1.19503	-0.385659	0.76543	0.193465	0.713397	-0.504004	0.705147	0.0939064	1.0273	0.128589	1.09322	0.658521	0.18143	0.305158	1.23555	0.299684	0.523336	0.186812
F5GZ78	Paxillin	PXN	PXN	64,233	-0.401686	0.756973	0.015532	1.80877	-0.245102	0.843756	0.122305	0.912554	-0.164777	0.892066	0.291001	0.536106	-0.496618	0.708766	0.00382286	2.41761	-0.665415	0.630507	0.000286246	3.54326	0.156584	1.11464	0.410012	0.387204	0.236909	1.17847	0.217519	0.662502	-0.0949321	0.936316	0.615521	0.210757	-0.263729	0.832932	0.171738	0.765134	0.0803254	1.05726	0.670602	0.173535	-0.251516	0.840013	0.191529	0.717767	-0.420313
F5GZS6	4F2 cell-surface antigen heavy chain	SLC3A2	SLC3A2	64,873	0.409237	1.32798	0.0817746	1.08738	0.709507	1.63525	0.00471844	2.3262	1.23673	2.35664	1.98324e-05	4.70263	0.125523	1.0909	0.58035	0.23631	0.778529	1.71538	0.00231589	2.63528	0.30027	1.23137	0.285338	0.54464	0.827492	1.7746	0.00665886	2.1766	-0.283714	0.821474	0.311998	0.505848	0.369292	1.29172	0.192036	0.716618	0.527222	1.44115	0.0681903	1.16628	-0.583983	0.667119	0.0452678	1.34421	0.069022
F5H0C4	Proteasomal ATPase-associated factor 1	PAAF1	PAAF1	42,723	0.195377	1.14502	0.0795791	1.0992	0.0886123	1.06335	0.412164	0.38493	0.269979	1.20579	0.018956	1.72225	0.252399	1.19119	0.027	1.56864	0.301772	1.23266	0.00981187	2.00825	-0.106765	0.928668	0.419671	0.377091	0.0746018	1.05307	0.571215	0.2432	0.057022	1.04032	0.664612	0.177432	0.106395	1.07653	0.421258	0.375452	0.181367	1.13396	0.176875	0.752334	0.163787	1.12022	0.220714	0.656171	0.21316
F5H1S9	tRNA pseudouridine synthase A	PUS1	PUS1	41,729	-0.275525	0.826149	0.367232	0.43506	0.172912	1.12733	0.569087	0.244822	-0.0380613	0.973963	0.899869	0.0458209	0.19702	1.14633	0.516988	0.28652	-0.0381682	0.973891	0.899589	0.0459559	0.448437	1.36456	0.234417	0.630011	0.237464	1.17892	0.523602	0.280999	0.472545	1.38756	0.211092	0.675529	0.237357	1.17883	0.523787	0.280846	-0.210973	0.863954	0.570535	0.243718	0.024108	1.01685	0.948108	0.0231424	-0.21108
F5H1Y4	Golgi-associated PDZ and coiled-coil motif containing protein transcript variant 3 (Golgi-associated PDZ and coiled-coil motif-containing protein)	GOPC	GOPC	44,790	0.324288	1.25205	0.0001757	3.75523	-0.10034	0.932813	0.171032	0.766924	0.261863	1.19903	0.00138968	2.85708	0.0236133	1.0165	0.741777	0.129726	0.159605	1.11698	0.0352002	1.45346	-0.424628	0.745031	8.40671e-05	4.07537	-0.0624252	0.957653	0.479133	0.319544	-0.300675	0.811873	0.00238187	2.62308	-0.164683	0.892124	0.0715316	1.1455	0.362203	1.28539	0.000452218	3.34465	0.123953	1.08972	0.167531	0.775905	0.259945
F5H345	Porphobilinogen deaminase	HMBS	HMBS	35,761	0.0426673	1.03002	0.804243	0.0946128	0.0233013	1.01628	0.892268	0.0495045	-0.123945	0.917675	0.474054	0.324172	0.330147	1.25714	0.0660933	1.17984	-0.0529647	0.963953	0.758425	0.120087	-0.019366	0.986666	0.926764	0.033031	-0.166613	0.890932	0.43262	0.363893	0.287479	1.22051	0.182221	0.739402	-0.095632	0.935862	0.650715	0.186609	-0.147247	0.902972	0.487254	0.312245	0.306845	1.237	0.155754	0.807559	-0.076266
F5H365	Protein transport protein SEC23	SEC23A	SEC23A	82,969	-0.00529438	0.996337	0.911506	0.0402404	-0.00203506	0.99859	0.96592	0.0150587	-0.0200743	0.986182	0.674107	0.171271	0.0356149	1.02499	0.457773	0.33935	-0.0257628	0.982301	0.589953	0.229183	0.00325932	1.00226	0.955445	0.0197943	-0.0147799	0.989808	0.800146	0.0968308	0.0409092	1.02876	0.485821	0.313524	-0.0204684	0.985913	0.726088	0.139011	-0.0180392	0.987574	0.757426	0.12066	0.0376499	1.02644	0.520845	0.283291	-0.0237278
F5H3K2	Chromosome 12 open reading frame 43 (Fragment)	C12orf43	C12orf43	20,499	0.173993	1.12818	0.369634	0.432228	0.0954104	1.06837	0.620259	0.207427	-0.0659755	0.955299	0.731464	0.135807	-0.489566	0.712239	0.0177433	1.75097	-0.0624799	0.957617	0.745147	0.127758	-0.0785822	0.946988	0.738551	0.13162	-0.239968	0.846764	0.313656	0.503547	-0.663559	0.631319	0.00968936	2.0137	-0.236473	0.848818	0.32058	0.494063	-0.161386	0.894166	0.494988	0.305405	-0.584977	0.66666	0.0203185	1.69211	-0.15789
F5H442	Tumor susceptibility gene 101 protein	TSG101	TSG101	40,918	-0.0279561	0.980809	0.754208	0.122509	-0.00325532	0.997746	0.970881	0.0128338	-0.0481284	0.96719	0.590777	0.228576	-0.0761789	0.948567	0.397284	0.400899	-0.119002	0.920824	0.191658	0.717474	0.0247008	1.01727	0.821195	0.0855537	-0.0201723	0.986115	0.853532	0.0687801	-0.0482228	0.967127	0.659624	0.180703	-0.0910459	0.938842	0.408584	0.388719	-0.0448731	0.969375	0.681826	0.166326	-0.0729236	0.950709	0.506726	0.295227	-0.115747
F5H5D3	Tubulin alpha chain	TUBA1C	TUBA1C	57,730	-0.314542	0.804106	0.00313778	2.50338	0.107722	1.07753	0.264152	0.578146	-0.148307	0.902309	0.129359	0.888202	-0.0105642	0.992704	0.911423	0.0402801	-0.0516654	0.964822	0.587744	0.230812	0.422265	1.34003	0.00148448	2.82843	0.166235	1.12213	0.163196	0.787291	0.303978	1.23454	0.0154276	1.8117	0.262877	1.19987	0.0330351	1.48102	-0.25603	0.837389	0.0373545	1.42766	-0.118287	0.921281	0.315283	0.501299	-0.159388
F5H669	Cleavage and polyadenylation-specificity factor subunit 7 (Fragment)	CPSF7	CPSF7	41,266	0.0605862	1.04289	0.429828	0.366705	0.0530628	1.03747	0.488489	0.311145	-0.0368663	0.97477	0.629246	0.20118	0.0124618	1.00868	0.870027	0.0604671	0.0521569	1.03681	0.495855	0.304646	-0.00752343	0.994799	0.935699	0.0288637	-0.0974526	0.934682	0.302518	0.519249	-0.0481244	0.967193	0.606996	0.216815	-0.00842939	0.994174	0.927978	0.0324624	-0.0899291	0.939569	0.340423	0.467981	-0.040601	0.97225	0.664018	0.17782	-0.000905959
F5H6E2	Unconventional myosin-Ic	MYO1C	MYO1C	118,994	0.317556	1.24622	0.0570649	1.24363	0.298604	1.22995	0.0721296	1.14189	0.464732	1.38006	0.00781078	2.10731	0.193665	1.14367	0.232515	0.633549	0.513784	1.42779	0.00384501	2.4151	-0.0189522	0.986949	0.922619	0.0349775	0.147176	1.1074	0.453829	0.343107	-0.123891	0.917709	0.527492	0.277784	0.196228	1.1457	0.32057	0.494077	0.166128	1.12204	0.398739	0.399312	-0.104939	0.929844	0.591996	0.227681	0.215181
F5H7C6	COP9 signalosome complex subunit 7a (Fragment)	COPS7A	COPS7A	21,307	-0.185884	0.87911	0.799327	0.0972756	-0.0708535	0.952075	0.922752	0.0349152	0.0163956	1.01143	0.982096	0.00784602	-0.0360988	0.975289	0.960594	0.0174601	-0.378309	0.769339	0.605814	0.217661	0.115031	1.083	0.897731	0.0468537	0.20228	1.15052	0.821267	0.0855156	0.149786	1.1094	0.867105	0.0619281	-0.192425	0.875134	0.829828	0.0810118	0.0872491	1.06234	0.922333	0.0351122	0.0347547	1.02438	0.969018	0.0136682	-0.307455
F5H8H2	Mevalonate kinase (MK) (EC 2.7.1.36)	MVK	MVK	37,172	-0.211955	0.863367	0.0474838	1.32345	-0.0882564	0.940659	0.389791	0.409169	0.081431	1.05807	0.426856	0.369719	-0.425542	0.744559	0.000398377	3.39971	-0.130751	0.913356	0.20756	0.682857	0.123699	1.08952	0.326413	0.486232	0.293386	1.22551	0.0269815	1.56893	-0.213588	0.86239	0.0976987	1.01011	0.0812042	1.0579	0.516529	0.286905	0.169687	1.12481	0.18277	0.738094	-0.337286	0.791529	0.0124994	1.90311	-0.0424943
F6WQW2	Ran-specific GTPase-activating protein	RANBP1	RANBP1	31,904	-0.159608	0.895268	0.00053977	3.26779	-0.136361	0.909811	0.00218659	2.66023	-0.148686	0.902072	0.00104328	2.9816	-0.00417358	0.997111	0.915508	0.0383379	-0.186507	0.878731	0.000107022	3.97053	0.0232471	1.01624	0.630403	0.200382	0.0109223	1.0076	0.820747	0.0857904	0.155435	1.11376	0.00383501	2.41623	-0.0268981	0.981528	0.578089	0.238005	-0.0123248	0.991494	0.798234	0.0978696	0.132188	1.09595	0.0115552	1.93722	-0.0501452
F8VPD4	CAD protein	CAD	CAD	236,023	-0.233122	0.850792	2.1758e-05	4.66238	-0.0966497	0.935202	0.0337489	1.47174	-0.265061	0.832164	4.09503e-06	5.38774	-0.0997456	0.933198	0.0289945	1.53768	-0.181121	0.882018	0.000369841	3.43198	0.136472	1.09921	0.0161059	1.79302	-0.0319393	0.978105	0.545588	0.263135	0.133376	1.09686	0.0183245	1.73697	0.0520009	1.0367	0.328742	0.483145	-0.168411	0.889822	0.00406398	2.39105	-0.0030959	0.997856	0.953069	0.0208756	-0.084471
F8VQR7	Cysteine and glycine-rich protein 2	CSRP2	CSRP2	20,678	0.496736	1.41102	0.00139544	2.85529	0.0605233	1.04284	0.656681	0.182645	0.505194	1.41931	0.0012043	2.91927	0.208657	1.15561	0.135419	0.868321	0.470228	1.38533	0.00221083	2.65544	-0.436213	0.739072	0.0151452	1.81973	0.00845735	1.00588	0.959452	0.0179766	-0.28808	0.818992	0.0947405	1.02346	-0.0265081	0.981794	0.873428	0.0587729	0.44467	1.361	0.0135324	1.86863	0.148133	1.10813	0.377908	0.422614	0.409705
F8VRR3	Methionine aminopeptidase 2 (MAP 2) (MetAP 2) (EC 3.4.11.18) (Initiation factor 2-associated 67 kDa glycoprotein) (Peptidase M) (p67) (p67eIF2)	METAP2	METAP2	48,876	-0.0730312	0.950639	0.13614	0.866015	-0.0733308	0.950441	0.134627	0.870866	-0.0410041	0.971978	0.393686	0.40485	-0.0863534	0.941901	0.0812324	1.09027	-0.0120643	0.991673	0.800203	0.0967998	-0.000299561	0.999792	0.995903	0.00178307	0.0320271	1.02245	0.584421	0.233274	-0.0133222	0.990808	0.819474	0.086465	0.0609669	1.04316	0.302513	0.519256	0.0323267	1.02266	0.580938	0.23587	-0.0130226	0.991014	0.82346	0.0843574	0.0612665
F8VSC5	SCY1-like protein 2 (Fragment)	SCYL2	SCYL2	77,054	-0.151777	0.900141	0.364635	0.438141	0.0887695	1.06346	0.593439	0.226624	-0.211603	0.863577	0.210608	0.676526	-0.00814069	0.994373	0.960812	0.0173614	-0.402068	0.756773	0.0232008	1.6345	0.240547	1.18144	0.24397	0.612663	-0.059825	0.95938	0.768371	0.114429	0.143637	1.10469	0.481785	0.317147	-0.25029	0.840727	0.226037	0.645821	-0.300372	0.812043	0.149451	0.825502	-0.0969102	0.935033	0.633917	0.197968	-0.490837
F8VVA7	Coatomer subunit zeta	COPZ1	COPZ1	22,340	0.0270439	1.01892	0.676029	0.170035	0.182596	1.13492	0.00957257	2.01897	0.179977	1.13287	0.0104885	1.97929	-0.0153488	0.989417	0.812246	0.0903123	0.118859	1.08588	0.0770185	1.11341	0.155552	1.11385	0.060174	1.22059	0.152933	1.11183	0.0642447	1.19216	-0.0423926	0.971043	0.593269	0.226748	0.0918153	1.06571	0.253521	0.595986	-0.00261955	0.998186	0.973576	0.0116299	-0.197945	0.871791	0.0196758	1.70607	-0.0637371
F8VVT7	Charged multivesicular body protein 1a	CHMP1A	CHMP1A	20,787	0.00922439	1.00641	0.950946	0.0218443	-0.0421689	0.971194	0.778737	0.108609	0.0477124	1.03362	0.750628	0.124575	0.429583	1.34684	0.00879794	2.05562	0.220444	1.16509	0.15209	0.817899	-0.0513933	0.965004	0.779791	0.108022	0.038488	1.02704	0.834077	0.0787937	0.420359	1.33826	0.0311086	1.50712	0.211219	1.15767	0.257803	0.588713	0.0898813	1.06428	0.625561	0.20373	0.471752	1.38679	0.0170327	1.76872	0.262613
F8VZJ2	Nascent polypeptide-associated complex subunit alpha	NACA	NACA	15,016	0.0128425	1.00894	0.736848	0.132622	-0.0536638	0.963486	0.169849	0.769938	0.0597936	1.04232	0.128249	0.891945	-0.11883	0.920934	0.00498176	2.30262	-0.0422591	0.971133	0.275426	0.559996	-0.0665063	0.954948	0.16506	0.782357	0.0469511	1.03308	0.321201	0.493223	-0.131673	0.912772	0.00980633	2.00849	-0.0551016	0.962527	0.246513	0.60816	0.113457	1.08182	0.0231721	1.63504	-0.0651666	0.955835	0.173333	0.76112	0.0114047
F8W031	DUF3456 domain-containing protein (Fragment)	0	0	29,224	0.286288	1.2195	0.0818565	1.08695	0.203463	1.15146	0.207722	0.682517	0.140013	1.10191	0.380968	0.419111	0.342283	1.26776	0.0404816	1.39274	0.119307	1.08621	0.454145	0.342806	-0.0828247	0.944207	0.669868	0.174011	-0.146275	0.903581	0.453675	0.343255	0.0559955	1.03958	0.772895	0.111879	-0.166981	0.890705	0.393354	0.405217	-0.0634501	0.956973	0.743735	0.128582	0.13882	1.101	0.476703	0.321752	-0.0841562
F8W0Q9	Periphilin-1	PPHLN1	PPHLN1	44,683	0.0838083	1.05981	0.786527	0.104286	-0.405599	0.754923	0.19895	0.701256	-0.20915	0.865047	0.501194	0.299994	-0.0413477	0.971747	0.893634	0.0488404	-0.0114838	0.992072	0.970371	0.0130623	-0.489407	0.712318	0.205404	0.687391	-0.292958	0.816227	0.442543	0.354044	-0.125156	0.916905	0.741345	0.129979	-0.0952921	0.936083	0.80146	0.0961183	0.196449	1.14587	0.605121	0.218158	0.364251	1.28721	0.341628	0.466447	0.394115
F8W1A4	Adenylate kinase 2, mitochondrial (AK 2) (EC 2.7.4.3) (ATP-AMP transphosphorylase 2) (ATP:AMP phosphotransferase) (Adenylate monophosphate kinase)	AK2	AK2	25,631	0.143902	1.10489	0.00972947	2.01191	0.0917707	1.06568	0.0834699	1.07847	0.221767	1.16616	0.000271929	3.56554	-0.170469	0.888554	0.00293499	2.53239	-0.043834	0.970074	0.394606	0.403836	-0.0521311	0.964511	0.408194	0.389133	0.0778651	1.05546	0.221479	0.654667	-0.314371	0.804202	5.43802e-05	4.26456	-0.187736	0.877983	0.00640418	2.19354	0.129996	1.09429	0.0479126	1.31955	-0.26224	0.833793	0.000388062	3.4111	-0.135605
F8W1B9	YEATS domain-containing protein 4 (Fragment)	YEATS4	YEATS4	24,431	-0.101062	0.932347	0.469821	0.328067	0.0154409	1.01076	0.911499	0.0402436	-0.0214414	0.985248	0.877359	0.0568229	0.105008	1.0755	0.452894	0.344003	0.000959541	1.00067	0.994488	0.00240038	0.116503	1.0841	0.495989	0.304528	0.0796203	1.05674	0.640687	0.193354	0.206069	1.15354	0.234178	0.630453	0.102021	1.07328	0.550506	0.259238	-0.0368822	0.974759	0.828461	0.0817277	0.0895669	1.06405	0.599817	0.221981	-0.0144813
F8W6G1	Nuclear receptor-binding protein	NRBP1	NRBP1	60,830	0.0934515	1.06692	0.37346	0.427756	-0.163914	0.8926	0.125939	0.899839	0.0435965	1.03068	0.675597	0.170312	-0.127714	0.915281	0.227798	0.642451	-0.221641	0.85759	0.0431081	1.36544	-0.257365	0.836614	0.0539571	1.26795	-0.0498549	0.966033	0.69591	0.157447	-0.221165	0.857872	0.0937845	1.02787	-0.315092	0.8038	0.0209063	1.67972	0.207511	1.15469	0.114394	0.941597	0.0362001	1.02541	0.776367	0.109933	-0.0577265
F8W726	Ubiquitin-associated protein 2-like	UBAP2L	UBAP2L	113,628	0.0827128	1.05901	0.287176	0.541853	-0.132618	0.912175	0.0948305	1.02305	-0.00387428	0.997318	0.959663	0.0178814	-0.097582	0.934598	0.21173	0.674217	-0.00104624	0.999275	0.989102	0.00475874	-0.215331	0.861349	0.0307071	1.51276	-0.0865871	0.941748	0.361129	0.442338	-0.180295	0.882523	0.065775	1.18194	-0.083759	0.943596	0.376706	0.423998	0.128744	1.09334	0.179872	0.745035	0.0350362	1.02458	0.709295	0.149173	0.131572
F8W7U3	WASH complex subunit 2A	WASHC2A	WASHC2A	136,862	0.0750072	1.05337	0.705807	0.151314	-0.0301899	0.979291	0.879053	0.0559847	0.104333	1.075	0.600136	0.22175	0.0310845	1.02178	0.8755	0.0577436	0.0114473	1.00797	0.953977	0.0204621	-0.105197	0.929678	0.665714	0.176712	0.0293262	1.02054	0.903925	0.0438675	-0.0439226	0.970014	0.856571	0.0672364	-0.0635599	0.9569	0.793762	0.10031	0.134523	1.09773	0.581186	0.235685	0.0612745	1.04339	0.801007	0.0963637	0.0416372
F8W7U8	Double-strand break repair protein	MRE11	MRE11	80,522	-0.0401946	0.972524	0.500099	0.300944	0.257846	1.19569	0.000269303	3.56976	-0.0437603	0.970123	0.463328	0.334111	0.213177	1.15924	0.00160865	2.79354	0.115359	1.08324	0.0626477	1.2031	0.298041	1.22947	0.000481187	3.31769	-0.00356572	0.997531	0.960819	0.0173582	0.253372	1.19199	0.00206666	2.68473	0.155553	1.11385	0.0421544	1.37516	-0.301607	0.811348	0.000428208	3.36835	-0.044669	0.969512	0.540206	0.267441	-0.142488
F8W930	Insulin-like growth factor 2 mRNA-binding protein 2	IGF2BP2	IGF2BP2	66,786	0.134044	1.09737	0.0544867	1.26371	0.175315	1.12921	0.0146422	1.83439	0.166895	1.12264	0.0193366	1.71362	0.110926	1.07992	0.106511	0.972607	0.325662	1.25324	7.39143e-05	4.13127	0.0412709	1.02902	0.613319	0.212313	0.0328504	1.02303	0.687159	0.162943	-0.0231188	0.984103	0.776635	0.109783	0.191618	1.14204	0.0271204	1.5667	-0.00842043	0.99418	0.917626	0.0373343	-0.0643896	0.95635	0.432565	0.363948	0.150347
F8W9S7	GTPase-activating protein and VPS9 domain-containing protein 1	GAPVD1	GAPVD1	157,464	-0.0400428	0.972626	0.665988	0.176533	-0.0855178	0.942446	0.360567	0.443014	-0.283442	0.821628	0.00560272	2.2516	0.0279519	1.01956	0.762891	0.117537	-0.00229697	0.998409	0.980199	0.00868583	-0.0454751	0.968971	0.688866	0.161866	-0.2434	0.844752	0.0417841	1.37899	0.0679947	1.04826	0.550385	0.259333	0.0377458	1.02651	0.739473	0.131078	-0.197925	0.871804	0.0922124	1.03521	0.11347	1.08183	0.322799	0.491067	0.0832209
F8WCF6	Actin-related protein 2/3 complex subunit 4	ARPC4-TTLL3	ARPC4-TTLL3	21,059	-0.040591	0.972257	0.524478	0.280272	-0.0142123	0.990197	0.822872	0.084668	0.0477484	1.03365	0.454928	0.342057	-0.241518	0.845855	0.000980246	3.00866	-0.174271	0.886215	0.0114884	1.93974	0.0263787	1.01845	0.73464	0.133926	0.0883394	1.06315	0.263224	0.579675	-0.200927	0.869991	0.0164212	1.7846	-0.13368	0.911503	0.0968153	1.01406	0.0619607	1.04388	0.42893	0.367614	-0.227306	0.854229	0.00767772	2.11477	-0.160059
F8WEX5	Inactive C-alpha-formylglycine-generating enzyme 2	SUMF2	SUMF2	18,584	0.305061	1.23547	0.257245	0.589653	0.212792	1.15893	0.425545	0.371054	0.367501	1.29012	0.175368	0.75605	0.0177111	1.01235	0.946696	0.0237894	0.552678	1.46681	0.0473389	1.32478	-0.0922691	0.938046	0.776326	0.109956	0.0624401	1.04423	0.847453	0.0718843	-0.28735	0.819406	0.380446	0.419707	0.247617	1.18724	0.448642	0.3481	0.154709	1.1132	0.634435	0.197613	-0.195081	0.873524	0.549461	0.260063	0.339886
F8WF49	Disks large-associated protein 4	DLGAP4	DLGAP4	26,941	0.22235	1.16663	0.0506765	1.29519	0.0468341	1.033	0.66621	0.176389	0.163406	1.11993	0.14222	0.84704	0.0398658	1.02802	0.713311	0.146721	0.281891	1.21579	0.0158253	1.80065	-0.175516	0.885451	0.195321	0.709251	-0.0589435	0.959967	0.657616	0.182027	-0.182484	0.881184	0.178895	0.747402	0.0595414	1.04213	0.654385	0.184167	0.116572	1.08416	0.384143	0.415507	-0.00696833	0.995182	0.95811	0.0185845	0.235057
G3V0I5	NADH dehydrogenase [ubiquinone] flavoprotein 1, mitochondrial (EC 1.6.99.3) (EC 7.1.1.2)	NDUFV1 hCG_21057	NDUFV1	50,054	0.0753882	1.05364	0.368675	0.433356	0.0847921	1.06053	0.313262	0.504092	-0.0877832	0.940968	0.296937	0.527335	0.00445195	1.00309	0.957227	0.018985	0.0291144	1.02039	0.726178	0.138957	0.00940395	1.00654	0.926305	0.0332461	-0.163171	0.89306	0.11969	0.921943	-0.0709362	0.95202	0.487973	0.311604	-0.0462738	0.968434	0.64983	0.1872	-0.172575	0.887257	0.100995	0.995699	-0.0803402	0.945835	0.432958	0.363554	-0.0556777
G3V1A6	Gasdermin domain containing 1, isoform CRA_d (Gasdermin-D)	GSDMD GSDMDC1 hCG_32063	GSDMD	57,735	-0.139233	0.908002	0.63116	0.199861	0.182788	1.13508	0.529378	0.276234	-0.0300308	0.979399	0.917297	0.0374901	-0.265958	0.831647	0.362769	0.44037	-0.0573102	0.961054	0.842972	0.0741869	0.322021	1.25008	0.368147	0.433979	0.109203	1.07863	0.758099	0.120274	-0.126724	0.915909	0.720909	0.14212	0.0819232	1.05843	0.817187	0.0876786	-0.212819	0.86285	0.549707	0.259869	-0.448746	0.73268	0.214096	0.669392	-0.240098
G3V1C3	Apoptosis inhibitor 5	API5	API5	57,561	-0.148494	0.902192	0.00707357	2.15036	-0.0371297	0.974592	0.462149	0.335218	-0.180471	0.882415	0.0016028	2.79512	0.100142	1.07188	0.056692	1.24648	-0.0607537	0.958763	0.234133	0.630538	0.111364	1.08025	0.0812058	1.09041	-0.0319774	0.978079	0.60386	0.219064	0.248636	1.18808	0.00055243	3.25772	0.0877403	1.0627	0.163467	0.78657	-0.143342	0.90542	0.0283039	1.54815	0.137271	1.09982	0.0348521	1.45777	-0.023624
G3V1D1	Ferritin	FTH1 hCG_1776129	FTH1	12,876	0.656199	1.57593	1.52703e-06	5.81615	-0.00462787	0.996797	0.962729	0.016496	0.594945	1.51041	5.88437e-06	5.2303	0.582172	1.4971	7.84437e-06	5.10544	0.519277	1.43324	3.32428e-05	4.4783	-0.660827	0.632516	2.0764e-05	4.68269	-0.061254	0.958431	0.614684	0.211348	-0.0740268	0.949983	0.543536	0.264772	-0.136922	0.909458	0.26646	0.574367	0.599573	1.51527	6.67417e-05	4.1756	0.5868	1.50191	8.53841e-05	4.06862	0.523905
G3V2Q5	Actin-related protein 10	ACTR10	ACTR10	14,334	-0.260195	0.834975	0.0163683	1.786	0.277574	1.21216	0.0111517	1.95266	-0.204642	0.867754	0.0525488	1.27944	-0.0860166	0.94212	0.396727	0.401508	-0.0976469	0.934556	0.337265	0.472029	0.537769	1.45173	0.000259942	3.58512	0.0555531	1.03926	0.652823	0.185205	0.174179	1.12832	0.167573	0.775795	0.162548	1.11926	0.196424	0.706806	-0.482216	0.715877	0.000758112	3.12027	-0.363591	0.777228	0.00722488	2.14117	-0.375221
G3V2V8	NPC intracellular cholesterol transporter 2 (Fragment)	NPC2	NPC2	13,078	-0.279778	0.823718	0.007042	2.1523	-0.0628908	0.957344	0.507749	0.294351	-0.116246	0.922585	0.226897	0.644171	-0.497453	0.708356	3.13933e-05	4.50316	-0.427281	0.743662	0.0001783	3.74885	0.216887	1.16222	0.072011	1.1426	0.163531	1.12003	0.167564	0.77582	-0.217675	0.85995	0.0710627	1.14836	-0.147503	0.902812	0.211194	0.675318	-0.0533554	0.963692	0.64542	0.190158	-0.434562	0.739918	0.00110033	2.95848	-0.36439
G3V325	ATP5MF-PTCD1 readthrough	ATP5MF-PTCD1	ATP5MF-PTCD1	84,110	-0.284917	0.820789	0.215977	0.665593	0.55097	1.46507	0.0225564	1.64673	0.0451124	1.03176	0.841738	0.0748233	0.210054	1.15673	0.357459	0.446774	0.163712	1.12017	0.471397	0.326613	0.835887	1.78495	0.0061478	2.21128	0.33003	1.25704	0.240975	0.618027	0.494971	1.40929	0.0849297	1.07094	0.44863	1.36474	0.116045	0.935375	-0.505858	0.704242	0.0787698	1.10364	-0.340916	0.78954	0.226337	0.645245	-0.387258
G3V582	Gephyrin	GPHN	GPHN	41,356	-0.131097	0.913137	0.165389	0.781492	-0.049154	0.966503	0.595311	0.225256	-0.0979996	0.934328	0.294632	0.53072	0.0673495	1.04779	0.468135	0.329629	-0.0605774	0.95888	0.513503	0.289457	0.0819431	1.05844	0.47103	0.326952	0.0330975	1.02321	0.769714	0.113671	0.198447	1.14746	0.0903261	1.04419	0.0705197	1.05009	0.534353	0.272172	-0.0488456	0.96671	0.666111	0.176453	0.116504	1.0841	0.308643	0.510544	-0.0114234
G3V5E4	Glucosamine 6-phosphate N-acetyltransferase (EC 2.3.1.4)	GNPNAT1	GNPNAT1	12,976	-0.0368867	0.974756	0.855395	0.0678332	0.32865	1.25584	0.115567	0.937166	0.00871721	1.00606	0.965634	0.0151874	0.151897	1.11103	0.455981	0.341053	0.116089	1.08379	0.567726	0.245861	0.365536	1.28836	0.150796	0.821611	0.0456039	1.03212	0.854045	0.0685195	0.188784	1.1398	0.449447	0.347322	0.152975	1.11186	0.538954	0.268448	-0.319932	0.801107	0.205866	0.686415	-0.176752	0.884692	0.478471	0.320144	-0.212561
G3V5R9	Kinesin light chain 1	KLC1	KLC1	71,407	0.0890145	1.06364	0.2446	0.611543	0.0141033	1.00982	0.851285	0.0699251	-0.00587876	0.995933	0.937687	0.027942	0.0530767	1.03748	0.483003	0.31605	0.047325	1.03335	0.531144	0.274788	-0.0749112	0.949401	0.419815	0.376942	-0.0948932	0.936342	0.30918	0.509789	-0.0359378	0.975398	0.696913	0.156821	-0.0416894	0.971517	0.651609	0.186013	-0.019982	0.986245	0.828324	0.0817997	0.0389734	1.02738	0.672844	0.172086	0.0332218
G3V5Z7	Proteasome subunit alpha type (EC 3.4.25.1)	PSMA6	PSMA6	28,147	-0.00897201	0.9938	0.823173	0.084509	-0.0807433	0.94557	0.0549645	1.25992	-0.015409	0.989376	0.701482	0.153983	-0.00186585	0.998708	0.962911	0.0164138	-0.0530096	0.963923	0.19593	0.707899	-0.0717713	0.951469	0.154689	0.81054	-0.00643701	0.995548	0.895806	0.0477858	0.00710616	1.00494	0.885052	0.0530311	-0.0440376	0.969937	0.374967	0.426007	0.0653343	1.04633	0.19323	0.713925	0.0788774	1.0562	0.119686	0.921956	0.0277337
G3XAH6	Poly(A) polymerase (EC 2.7.7.19)	PAPOLA	PAPOLA	80,626	-0.0339255	0.976759	0.642376	0.192211	0.0556776	1.03935	0.448065	0.348659	-0.0952089	0.936137	0.200626	0.697612	0.160956	1.11803	0.036771	1.43449	0.179377	1.13239	0.0215003	1.66756	0.0896032	1.06408	0.32135	0.493022	-0.0612834	0.958411	0.494767	0.3056	0.194882	1.14463	0.0387445	1.41179	0.213302	1.15934	0.0250821	1.60064	-0.150887	0.900697	0.102243	0.990366	0.105279	1.0757	0.246133	0.60883	0.123699
G5E9D5	ElaC homolog 2 (E. coli), isoform CRA_a (Zinc phosphodiesterase ELAC protein 2)	ELAC2 hCG_29734	ELAC2	90,037	-0.226056	0.854969	0.014743	1.83141	0.00562068	1.0039	0.947775	0.0232949	-0.156817	0.897002	0.0789873	1.10244	0.0475184	1.03349	0.581182	0.235688	0.0646071	1.0458	0.454688	0.342287	0.231677	1.1742	0.0371296	1.43028	0.0692388	1.04916	0.512292	0.290482	0.273574	1.2088	0.0157966	1.80144	0.290663	1.2232	0.0110035	1.95847	-0.162438	0.893514	0.133166	0.875608	0.0418977	1.02947	0.690714	0.160702	0.0589865
G5E9Q6	Profilin	PFN2 hCG_21343	PFN2	20,787	0.195265	1.14493	0.0171704	1.76522	0.0195247	1.01363	0.797724	0.0981474	0.207182	1.15443	0.0121421	1.9157	0.318286	1.24685	0.000402455	3.39528	0.206862	1.15418	0.0122564	1.91164	-0.175741	0.885313	0.0706673	1.15078	0.0119164	1.00829	0.898309	0.0465744	0.123021	1.08901	0.196427	0.7068	0.0115969	1.00807	0.90102	0.0452658	0.187657	1.13891	0.0548974	1.26045	0.298762	1.23009	0.00403476	2.39418	0.187338
G5EA06	28S ribosomal protein S27, mitochondrial (Mitochondrial ribosomal protein S27, isoform CRA_b)	MRPS27 hCG_37853	MRPS27	41,329	-0.092221	0.938077	0.460378	0.336886	0.261528	1.19875	0.0452932	1.34397	-0.0364994	0.975018	0.768846	0.114161	0.0155761	1.01086	0.900106	0.0457064	0.115304	1.0832	0.357847	0.446302	0.353749	1.27788	0.0286432	1.54298	0.0557216	1.03938	0.714286	0.146128	0.107797	1.07758	0.480814	0.318023	0.207525	1.15471	0.181854	0.740278	-0.298027	0.813364	0.0608295	1.21589	-0.245951	0.843259	0.116765	0.932687	-0.146223
G5EA30	CUG triplet repeat, RNA binding protein 1, isoform CRA_c (CUGBP Elav-like family member 1)	CELF1 CUGBP1 hCG_25183	CELF1	55,143	0.115548	1.08339	0.355512	0.449146	-0.0916842	0.938427	0.461699	0.335641	-0.0264533	0.981831	0.83077	0.0805189	0.0315093	1.02208	0.79911	0.0973935	-0.0331193	0.977305	0.7891	0.102868	-0.207232	0.866197	0.181254	0.741712	-0.142001	0.906261	0.353903	0.451116	-0.0840387	0.943413	0.580587	0.236133	-0.148667	0.902083	0.332263	0.478517	0.0652309	1.04625	0.667536	0.175525	0.123194	1.08914	0.420007	0.376744	0.0585649
G5EA31	Protein transport protein Sec24C (SEC24 related gene family, member C (S. cerevisiae), isoform CRA_b)	SEC24C hCG_19035	SEC24C	111,985	-0.0856592	0.942354	0.0408523	1.38878	-0.0147534	0.989826	0.710565	0.148396	0.0034722	1.00241	0.930288	0.0313824	-0.0426226	0.970888	0.289714	0.538031	-0.0380815	0.973949	0.342811	0.464946	0.0709059	1.05038	0.15515	0.809248	0.0891314	1.06373	0.0780585	1.10758	0.0430366	1.03028	0.380595	0.419537	0.0475777	1.03353	0.333417	0.477013	0.0182256	1.01271	0.708182	0.149855	-0.0278692	0.980868	0.567999	0.245652	-0.0233281
G5EA48	SLIT-ROBO Rho GTPase activating protein 1, isoform CRA_a (SLIT-ROBO Rho GTPase-activating protein 1)	SRGAP1 hCG_1818050	SRGAP1	116,842	-0.0267335	0.98164	0.915046	0.0385572	-0.171384	0.88799	0.496518	0.304065	-0.237642	0.848131	0.348318	0.458023	-0.168204	0.88995	0.504451	0.297181	-0.0916593	0.938443	0.714971	0.145711	-0.144651	0.904598	0.638328	0.194956	-0.210908	0.863993	0.494481	0.30585	-0.141471	0.906595	0.645689	0.189976	-0.0649257	0.955995	0.832539	0.0795953	-0.0662573	0.955113	0.829161	0.0813611	0.00318036	1.00221	0.991731	0.00360598	0.0797252
G8JLD5	#N/A	#N/A	#N/A	#N/A	0.057589	1.04073	0.204436	0.689442	-0.0114958	0.992063	0.796129	0.0990165	-0.0146574	0.989892	0.741973	0.129612	0.148275	1.10824	0.0029772	2.52619	0.0917579	1.06567	0.0495421	1.30503	-0.0690847	0.953243	0.213506	0.67059	-0.0722463	0.951156	0.194083	0.712012	0.0906859	1.06488	0.107174	0.969909	0.034169	1.02397	0.532339	0.273812	-0.00316162	0.997811	0.953698	0.0205889	0.159771	1.11711	0.0075182	2.12389	0.103254
H0UI80	Negative elongation factor C/D (TH1-like (Drosophila), isoform CRA_b)	NELFCD TH1L hCG_28547	NELFCD	67,347	-0.268952	0.829922	0.0318718	1.49659	-0.185271	0.879484	0.127745	0.893655	-0.0988896	0.933751	0.406462	0.39098	0.0673758	1.04781	0.569876	0.24422	-0.091828	0.938333	0.440247	0.356303	0.0836807	1.05972	0.564498	0.248337	0.170063	1.12511	0.247672	0.606124	0.336328	1.26254	0.0288045	1.54054	0.177124	1.13063	0.229232	0.639725	0.0863819	1.0617	0.552105	0.257978	0.252647	1.19139	0.0920909	1.03578	0.0934435
H0Y360	AMP deaminase (EC 3.5.4.6)	AMPD2	AMPD2	96,055	0.0412488	1.029	0.626172	0.203306	0.0374918	1.02633	0.657776	0.181922	0.126275	1.09147	0.14547	0.837227	0.027808	1.01946	0.742206	0.129475	0.132662	1.09631	0.127194	0.895534	-0.00375697	0.997399	0.971016	0.0127738	0.0850258	1.06071	0.414846	0.382113	-0.0134408	0.990727	0.896595	0.0474036	0.0914127	1.06541	0.381296	0.418737	0.0887828	1.06347	0.394889	0.403525	-0.00968386	0.99331	0.92539	0.033675	0.0951697
H0Y3P2	Eukaryotic translation initiation factor 4 gamma 2	EIF4G2	EIF4G2	98,118	-0.221162	0.857874	2.54385e-05	4.59451	-0.0779035	0.947433	0.0702825	1.15315	-0.38691	0.764766	7.09931e-09	8.14878	0.103237	1.07418	0.0197214	1.70506	-0.150017	0.90124	0.0014691	2.83295	0.143259	1.1044	0.0094244	2.02575	-0.165748	0.891466	0.00338913	2.46991	0.3244	1.25214	2.38544e-06	5.62243	0.071145	1.05055	0.169381	0.771135	-0.309007	0.807197	4.6447e-06	5.33304	0.181141	1.13378	0.00165822	2.78036	-0.0721137
H0Y4Z8	Deleted.	0	0	0	-0.00482725	0.99666	0.970358	0.0130682	-0.165775	0.89145	0.210966	0.675787	0.0802453	1.0572	0.538703	0.26865	-0.248502	0.84177	0.0669255	1.17441	-0.253535	0.838839	0.0620114	1.20753	-0.160948	0.894437	0.317864	0.497759	0.0850726	1.06074	0.594176	0.226085	-0.243674	0.844591	0.136548	0.864714	-0.248707	0.84165	0.129063	0.889197	0.24602	1.18593	0.133016	0.876097	-0.0827267	0.944271	0.604316	0.218736	-0.0877595
H0Y5B4	60S ribosomal protein L36a	RPL36A	RPL36A	13,228	-0.119601	0.920442	0.0455181	1.34182	-0.0549507	0.962627	0.338949	0.469866	-0.217465	0.860075	0.000930152	3.03145	-0.0342557	0.976535	0.54828	0.260997	-0.0978862	0.934401	0.0962586	1.01656	0.0646498	1.04583	0.35789	0.446251	-0.0978649	0.934415	0.16966	0.770422	0.0853448	1.06094	0.228461	0.641188	0.0217143	1.01517	0.755225	0.121923	-0.162515	0.893466	0.0281635	1.55031	0.0206949	1.01445	0.766349	0.115574	-0.0429355
H0Y8X4	2'-deoxynucleoside 5'-phosphate N-hydrolase 1 (Fragment)	DNPH1	DNPH1	25,868	0.280773	1.21485	0.00285367	2.5446	0.377994	1.29953	0.000182863	3.73787	0.598419	1.51406	5.10232e-07	6.29223	0.160091	1.11736	0.0670543	1.17357	0.557117	1.47133	1.43932e-06	5.84184	0.0972207	1.06971	0.348498	0.4578	0.317645	1.24629	0.00517113	2.28641	-0.120682	0.919753	0.247304	0.606768	0.276344	1.21112	0.0128981	1.88947	0.220425	1.16508	0.0416082	1.38082	-0.217903	0.859815	0.0437621	1.3589	0.179123
H0Y987	Phosphoacetylglucosamine mutase (PAGM) (EC 5.4.2.3) (Acetylglucosamine phosphomutase) (N-acetylglucosamine-phosphate mutase)	PGM3	PGM3	62,761	0.444861	1.36118	0.000199787	3.69943	0.0653725	1.04636	0.5129	0.289968	0.225824	1.16945	0.0322053	1.49207	0.265674	1.2022	0.0135172	1.86911	0.246798	1.18657	0.0205146	1.68794	-0.379488	0.76871	0.00492929	2.30722	-0.219036	0.859139	0.0832996	1.07936	-0.179187	0.883201	0.151524	0.819517	-0.198062	0.871721	0.114912	0.939633	0.160452	1.11764	0.196808	0.705957	0.200301	1.14894	0.111111	0.954244	0.181426
H0Y993	DEK oncogene (DNA binding), isoform CRA_b (Protein DEK)	DEK hCG_36749	DEK	43,248	0.0749829	1.05335	0.489905	0.309888	0.0226294	1.01581	0.834038	0.0788144	0.154827	1.11329	0.16184	0.790913	0.266445	1.20284	0.0212081	1.6735	0.266935	1.20325	0.0210006	1.67777	-0.0523535	0.964362	0.692676	0.15947	0.0798442	1.0569	0.547714	0.261446	0.191462	1.14192	0.158005	0.80133	0.191953	1.14231	0.156995	0.804114	0.132198	1.09596	0.323337	0.490345	0.243816	1.18412	0.0764932	1.11638	0.244306
H0YBX2	Putative deoxyribonuclease TATDN1 (Fragment)	TATDN1	TATDN1	22,669	-0.240878	0.84623	0.173397	0.760959	-0.170564	0.888495	0.329461	0.482196	-0.171165	0.888125	0.3278	0.484392	-0.147842	0.9026	0.396551	0.401701	-0.619102	0.651076	0.00166388	2.77888	0.0703137	1.04994	0.740054	0.130736	0.0697125	1.04951	0.742192	0.129484	0.0930357	1.06661	0.660996	0.179801	-0.378225	0.769384	0.0853335	1.06888	-0.000601234	0.999583	0.997733	0.000985549	0.0227219	1.01587	0.914512	0.0388108	-0.448538
H0YBX3	2-iminobutanoate/2-iminopropanoate deaminase (Fragment)	RIDA	RIDA	13,826	0.531788	1.44572	8.27274e-05	4.08235	-0.0161214	0.988888	0.883105	0.0539879	0.225532	1.16921	0.0501901	1.29938	0.387098	1.30776	0.00187804	2.7263	0.390674	1.31101	0.00173903	2.75969	-0.54791	0.684011	0.000510562	3.29195	-0.306256	0.808738	0.0316277	1.49993	-0.14469	0.904574	0.288059	0.540518	-0.141114	0.906819	0.299809	0.523155	0.241653	1.18235	0.0832671	1.07953	0.40322	1.32246	0.00641848	2.19257	0.406796
H0YC42	Uncharacterized protein	0	0	31,170	0.153732	1.11244	0.0788842	1.10301	0.188118	1.13928	0.0346887	1.45981	0.397293	1.31703	0.000111355	3.95329	0.329292	1.2564	0.000755729	3.12163	0.455512	1.37127	2.22957e-05	4.65178	0.0343852	1.02412	0.738818	0.131463	0.243561	1.18391	0.0264833	1.57703	0.175559	1.1294	0.0996634	1.00146	0.301779	1.23266	0.00758622	2.11997	0.209175	1.15603	0.0529299	1.2763	0.141174	1.1028	0.180322	0.743951	0.267394
H0YD13	CD44 antigen	CD44	CD44	22,683	-0.39224	0.761946	0.131052	0.882556	0.545341	1.45937	0.0405897	1.39158	0.737135	1.66686	0.00773698	2.11143	-0.701213	0.615055	0.0106759	1.9716	-0.160072	0.89498	0.527871	0.277472	0.93758	1.91531	0.00598164	2.22318	1.12937	2.18764	0.00140326	2.85286	-0.308973	0.807216	0.323357	0.490317	0.232167	1.1746	0.455631	0.341387	0.191794	1.14218	0.536775	0.270208	-1.24655	0.421454	0.000571011	3.24336	-0.705413
H0YD97	Pyruvate dehydrogenase protein X component, mitochondrial (Fragment)	PDHX	PDHX	20,674	0.161506	1.11845	0.122648	0.91134	0.121153	1.0876	0.240737	0.618458	0.0523181	1.03693	0.607355	0.216557	0.254647	1.19304	0.019399	1.71222	0.331591	1.2584	0.00348503	2.45779	-0.0403539	0.972416	0.745736	0.127415	-0.109188	0.927109	0.384222	0.415417	0.0931408	1.06669	0.456765	0.340307	0.170085	1.12512	0.181018	0.742279	-0.0688345	0.953408	0.581135	0.235723	0.133495	1.09695	0.289643	0.538137	0.210439
H0YDP7	39S ribosomal protein L49, mitochondrial (Fragment)	MRPL49	MRPL49	14,683	-0.224801	0.855713	0.290334	0.537102	0.0821457	1.05859	0.695673	0.157595	0.0604562	1.0428	0.773239	0.111686	-0.221962	0.857398	0.2963	0.528268	0.0648039	1.04594	0.757462	0.120639	0.306947	1.23709	0.240042	0.619713	0.285257	1.21863	0.27377	0.562613	0.00283897	1.00197	0.991176	0.00384923	0.289605	1.22231	0.266743	0.573907	-0.0216896	0.985078	0.93267	0.0302722	-0.304108	0.809943	0.244269	0.612132	-0.0173418
H0YDU8	Serine/threonine-protein phosphatase (EC 3.1.3.16) (Fragment)	PPP5C	PPP5C	55,208	-0.0728391	0.950765	0.170415	0.768492	-0.15826	0.896105	0.00575679	2.23982	-0.0439837	0.969973	0.400719	0.39716	-0.194688	0.873762	0.00111222	2.95381	-0.252454	0.839467	7.98117e-05	4.09793	-0.0854211	0.942509	0.188447	0.724811	0.0288554	1.0202	0.650538	0.186727	-0.121848	0.919009	0.0662769	1.17864	-0.179615	0.882939	0.00958488	2.01841	0.114277	1.08243	0.0834714	1.07846	-0.0364273	0.975067	0.567991	0.245658	-0.0941937
H0YFD6	Trifunctional enzyme subunit alpha, mitochondrial	HADHA	HADHA	86,372	0.24141	1.18215	0.0146831	1.83318	0.0933183	1.06682	0.314389	0.502532	0.149419	1.10912	0.114021	0.943017	-0.202653	0.868951	0.0364754	1.438	0.0992925	1.07125	0.285212	0.544832	-0.148091	0.902444	0.196142	0.707429	-0.0919908	0.938227	0.415996	0.380911	-0.444063	0.735062	0.000681656	3.16643	-0.142117	0.906188	0.214052	0.669482	0.0561006	1.03965	0.61802	0.208997	-0.295971	0.814524	0.0145947	1.8358	0.00597416
H0YG54	Oligoribonuclease, mitochondrial	REXO2	REXO2	21,848	0.0202388	1.01413	0.805799	0.0937732	0.0103271	1.00718	0.900113	0.0457031	0.000324492	1.00022	0.996853	0.00136908	-0.0412473	0.971814	0.617185	0.209585	-0.0674982	0.954291	0.41583	0.381084	-0.00991168	0.993153	0.921638	0.0354396	-0.0199143	0.986291	0.843382	0.0739759	-0.0614861	0.958276	0.543551	0.26476	-0.087737	0.940998	0.388322	0.410809	-0.0100026	0.993091	0.920922	0.0357773	-0.0515744	0.964883	0.609887	0.21475	-0.0778253
H0YID3	Serine dehydratase-like (Fragment)	SDSL	SDSL	23,919	0.0978088	1.07015	0.580866	0.235924	-0.027219	0.98131	0.877454	0.0567757	0.11714	1.08458	0.509164	0.293142	-0.183651	0.880472	0.304501	0.516411	0.140641	1.10239	0.429135	0.367406	-0.125028	0.916986	0.564575	0.248278	0.0193308	1.01349	0.928738	0.0321068	-0.28146	0.822758	0.202126	0.694379	0.0428323	1.03013	0.842981	0.0741824	0.144359	1.10524	0.506562	0.295368	-0.156432	0.897241	0.472106	0.32596	0.16786
H0YN26	Acidic leucine-rich nuclear phosphoprotein 32 family member A	ANP32A	ANP32A	19,997	-0.00933291	0.993552	0.874628	0.0581766	0.111784	1.08056	0.0699427	1.15526	0.155385	1.11372	0.0149648	1.82493	-0.328374	0.796434	1.6344e-05	4.78664	-0.15621	0.897379	0.0145102	1.83833	0.121117	1.08758	0.105823	0.97542	0.164718	1.12095	0.0320848	1.4937	-0.319041	0.801603	0.000236708	3.62579	-0.146877	0.903203	0.0532562	1.27363	0.043601	1.03068	0.548969	0.260452	-0.440158	0.737054	5.03654e-06	5.29787	-0.267994
H0YNW5	Deoxyuridine 5'-triphosphate nucleotidohydrolase, mitochondrial	DUT	DUT	17,827	-0.706254	0.61291	2.45044e-12	11.6108	-0.389337	0.76348	7.36196e-08	7.13301	-0.609617	0.655371	3.61696e-11	10.4417	-0.634569	0.644133	1.74884e-11	10.7572	-0.738679	0.599288	1.0636e-12	11.9732	0.316917	1.24567	2.35803e-05	4.62745	0.0966374	1.06928	0.111412	0.95307	0.0716845	1.05094	0.231036	0.63632	-0.0324253	0.977775	0.58256	0.234659	-0.220279	0.858399	0.00112502	2.94884	-0.245232	0.84368	0.00041071	3.38646	-0.349342
H3BLU7	Aflatoxin B1 aldehyde reductase member 2 (Fragment)	AKR7A2	AKR7A2	34,684	0.0656594	1.04656	0.51231	0.290467	0.0348929	1.02448	0.726659	0.138669	0.384115	1.30506	0.000875337	3.05782	-0.141805	0.906384	0.165061	0.782356	0.149572	1.10924	0.144177	0.841105	-0.0307666	0.9789	0.801149	0.0962865	0.318456	1.247	0.0155971	1.80696	-0.207464	0.866058	0.100601	0.9974	0.0839126	1.05989	0.49435	0.305965	0.349222	1.27387	0.00887841	2.05166	-0.176698	0.884726	0.158173	0.800868	0.114679
H3BM14	NEDD8 ultimate buster 1 (NEDD8 ultimate buster-1, isoform CRA_d)	NUB1 NYREN18 hCG_19587	NUB1	71,922	1.02501	2.03497	0.0329903	1.48161	0.688335	1.61142	0.139757	0.854626	0.652863	1.57229	0.160209	0.795312	-0.192995	0.874788	0.671	0.173278	0.0748519	1.05325	0.868891	0.0610347	-0.336675	0.791864	0.546095	0.262731	-0.372147	0.772632	0.505066	0.296652	-1.21801	0.429877	0.0379629	1.42064	-0.950158	0.517576	0.0984263	1.00689	-0.0354715	0.975713	0.949059	0.0227067	-0.88133	0.542867	0.123567	0.908098	-0.613483
H3BMH2	Ras-related protein Rab-11A (Fragment)	RAB11A	RAB11A	17,668	-0.181405	0.881844	0.0270473	1.56788	-0.0379788	0.974019	0.623028	0.205493	0.0614407	1.04351	0.428739	0.367807	-0.261437	0.834257	0.00259314	2.58617	-0.177821	0.884037	0.0298539	1.525	0.143426	1.10452	0.139288	0.856086	0.242845	1.18332	0.0168362	1.77376	-0.0800323	0.946036	0.400467	0.397433	0.00358382	1.00249	0.969696	0.0133644	0.0994195	1.07134	0.298578	0.524943	-0.223458	0.85651	0.0262739	1.58048	-0.139842
H3BMM9	RNA-binding protein with serine-rich domain 1 (Fragment)	RNPS1	RNPS1	31,701	0.236807	1.17838	0.0021845	2.66065	-0.0246109	0.983086	0.719032	0.143252	0.332322	1.25904	8.00089e-05	4.09686	0.108741	1.07829	0.122523	0.911782	0.237276	1.17877	0.00214949	2.66767	-0.261418	0.834268	0.00485096	2.31417	0.095515	1.06845	0.261165	0.583084	-0.128066	0.915058	0.136692	0.864258	0.000469435	1.00033	0.995522	0.00194902	0.356933	1.2807	0.00032849	3.48348	0.133352	1.09684	0.122069	0.913393	0.261887
H3BMU1	IST1 homolog (Fragment)	IST1	IST1	23,375	0.17473	1.12875	0.00107044	2.97044	0.0678085	1.04812	0.154075	0.812269	0.0990748	1.07109	0.042664	1.36994	0.162013	1.11885	0.00204637	2.68902	0.173347	1.12767	0.00114884	2.93974	-0.106921	0.928568	0.0709216	1.14922	-0.0756548	0.948911	0.192251	0.716132	-0.0127161	0.991225	0.822884	0.0846615	-0.00138306	0.999042	0.980565	0.00852367	0.0312663	1.02191	0.583267	0.234133	0.094205	1.06748	0.108406	0.964946	0.105538
H3BN14	Calretinin (Fragment)	CALB2	CALB2	27,317	-0.66541	0.63051	0.0434013	1.3625	-0.324227	0.798726	0.306028	0.514239	-0.405906	0.754762	0.203333	0.691793	-0.937859	0.522007	0.00646157	2.18966	-1.39574	0.380051	0.000205269	3.68768	0.341183	1.26679	0.377511	0.423071	0.259504	1.19707	0.500307	0.300763	-0.272449	0.827913	0.479433	0.319272	-0.730327	0.602767	0.0676017	1.17004	-0.0816786	0.944958	0.831134	0.0803291	-0.613632	0.65355	0.120143	0.9203	-1.07151
H3BNC9	Uncharacterized protein	0	0	64,533	-0.054216	0.963118	0.206626	0.684815	-0.106268	0.928988	0.0187	1.72816	-0.0255541	0.982443	0.545391	0.263292	-0.0647252	0.956127	0.134837	0.870192	-0.0935584	0.937208	0.0356469	1.44798	-0.0520523	0.964563	0.318455	0.496952	0.0286619	1.02007	0.579458	0.236978	-0.0105092	0.992742	0.838447	0.0765244	-0.0393424	0.973098	0.448393	0.348341	0.0807142	1.05754	0.128264	0.891894	0.0415431	1.02921	0.423803	0.372836	0.0127099
H3BND4	Pyridoxal-dependent decarboxylase domain-containing protein 1	PDXDC1	PDXDC1	88,762	0.263764	1.20061	0.0348379	1.45795	0.0246137	1.01721	0.834867	0.0783827	0.272188	1.20764	0.0299858	1.52308	-0.00489848	0.99661	0.96689	0.014623	0.224664	1.16851	0.0681363	1.16662	-0.23915	0.847244	0.109331	0.961257	0.00842387	1.00586	0.953523	0.0206686	-0.268662	0.830089	0.074362	1.12865	-0.0390995	0.973262	0.786944	0.104056	0.247574	1.18721	0.0981424	1.00814	-0.0295122	0.979752	0.838284	0.0766087	0.20005
H3BPE1	Microtubule-actin cross-linking factor 1, isoforms 1/2/3/5	MACF1	MACF1	856,879	-0.195413	0.873323	0.0259891	1.58521	-0.116275	0.922567	0.168018	0.774645	-0.190928	0.876042	0.0291824	1.53488	-0.334294	0.793172	0.000535812	3.27099	-0.194339	0.873973	0.0267228	1.57312	0.0791385	1.05639	0.436025	0.360489	0.00448563	1.00311	0.964513	0.0156918	-0.138881	0.908223	0.178301	0.748846	0.00107411	1.00074	0.9915	0.00370744	-0.0746529	0.949571	0.462102	0.335262	-0.218019	0.859745	0.0405095	1.39244	-0.0780644
H3BPK3	Hydroxyacylglutathione hydrolase, mitochondrial (Fragment)	HAGH	HAGH	26,416	0.260137	1.19759	0.00500175	2.30088	0.232738	1.17506	0.0105598	1.97635	0.274193	1.20932	0.00338587	2.47033	0.37443	1.29633	0.000198736	3.70172	0.460719	1.37623	1.79754e-05	4.74532	-0.0273988	0.981188	0.789178	0.102825	0.0140554	1.00979	0.89083	0.0502053	0.114293	1.08244	0.271634	0.566015	0.200581	1.14916	0.0611015	1.21395	0.0414542	1.02915	0.686162	0.163574	0.141692	1.1032	0.176363	0.753593	0.22798
H3BQQ2	E3 ubiquitin-protein ligase ZNF598	ZNF598	ZNF598	93,288	-0.260122	0.835017	0.125052	0.90291	-0.17819	0.883811	0.285837	0.543881	-0.21666	0.860556	0.197381	0.704695	-0.194072	0.874135	0.246301	0.608533	-0.248143	0.84198	0.142359	0.846615	0.0819326	1.05843	0.68496	0.164335	0.0434629	1.03058	0.829348	0.0812631	0.0660501	1.04685	0.743443	0.128753	0.0119798	1.00834	0.952601	0.0210891	-0.0384697	0.973687	0.848682	0.0712549	-0.0158825	0.989051	0.937189	0.0281729	-0.0699529
H3BRS6	ADP-dependent glucokinase (Fragment)	ADPGK	ADPGK	21,916	-0.395114	0.760429	0.0448509	1.34823	-0.17654	0.884822	0.350492	0.455322	-0.209031	0.865118	0.27104	0.566967	-0.49705	0.708554	0.0139971	1.85396	-0.4296	0.742467	0.0305772	1.5146	0.218573	1.16358	0.345381	0.461701	0.186082	1.13767	0.420361	0.376378	-0.101937	0.931781	0.657068	0.18239	-0.0344867	0.976379	0.880344	0.0553476	-0.0324912	0.977731	0.887216	0.0519705	-0.32051	0.800787	0.171806	0.764961	-0.25306
H3BRY6	Integrator complex subunit 14	INTS14	INTS14	51,584	-0.189496	0.876912	0.0247123	1.60709	-0.0586742	0.960146	0.460996	0.336303	-0.033588	0.976988	0.671587	0.172897	-0.159222	0.895508	0.0547391	1.2617	-0.235541	0.849366	0.00677442	2.16913	0.130822	1.09492	0.186312	0.729759	0.155908	1.11412	0.118517	0.926218	0.0302739	1.02121	0.754782	0.122178	-0.0460449	0.968588	0.635297	0.197023	0.0250862	1.01754	0.795698	0.0992516	-0.100548	0.932679	0.305433	0.515084	-0.176867
H3BSM5	Gamma-aminobutyric acid receptor-associated protein-like 2	GABARAPL2	GABARAPL2	10,401	-0.268969	0.829913	0.00539873	2.26771	-0.277718	0.824895	0.00428321	2.36823	-0.511089	0.701693	8.35581e-06	5.07801	0.160091	1.11736	0.0782408	1.10657	-0.0837417	0.943607	0.34329	0.464339	-0.00874927	0.993954	0.934832	0.0292663	-0.24212	0.845502	0.0328698	1.4832	0.429059	1.34636	0.000604581	3.21855	0.185227	1.137	0.0948539	1.02294	-0.233371	0.850645	0.0389761	1.4092	0.437809	1.35455	0.000497874	3.30288	0.193976
H3BTL1	Microtubule-associated protein 1 light chain 3 beta, isoform CRA_f (Microtubule-associated proteins 1A/1B light chain 3B)	MAP1LC3B hCG_32374	MAP1LC3B	9,012	0.229764	1.17264	0.00467197	2.3305	-0.30595	0.80891	0.000400902	3.39696	0.0562288	1.03974	0.445388	0.351262	0.148422	1.10836	0.0531245	1.27471	0.0710447	1.05048	0.337035	0.472325	-0.535714	0.689817	6.24857e-06	5.20422	-0.173535	0.886667	0.0638033	1.19516	-0.0813418	0.945178	0.368766	0.43325	-0.158719	0.89582	0.0878475	1.05627	0.362178	1.28537	0.000558862	3.2527	0.454372	1.37019	4.93996e-05	4.30628	0.376994
H3BUF6	Ataxin-2-like protein	ATXN2L	ATXN2L	112,714	-0.000143558	0.9999	0.997907	0.000910109	0.067926	1.04821	0.223165	0.651373	0.0924263	1.06616	0.10258	0.988938	0.0403972	1.0284	0.463385	0.334058	0.116764	1.0843	0.0429504	1.36703	0.0680695	1.04831	0.315935	0.500402	0.0925699	1.06627	0.177143	0.751675	0.0405408	1.0285	0.547046	0.261976	0.116908	1.08441	0.0925	1.03386	0.0245003	1.01713	0.715119	0.145622	-0.0275287	0.981099	0.681862	0.166304	0.0488385
H3BUM8	Ubiquitin domain-containing protein UBFD1	UBFD1	UBFD1	19,576	0.0664587	1.04714	0.709973	0.148758	-0.0147999	0.989794	0.933886	0.029706	0.221579	1.16601	0.222926	0.651839	-0.406716	0.754338	0.0317171	1.49871	0.0448508	1.03158	0.801646	0.0960175	-0.0812586	0.945233	0.710435	0.148476	0.155121	1.11351	0.480491	0.318315	-0.473175	0.720378	0.0402385	1.39536	-0.0216079	0.985134	0.921227	0.0356331	0.236379	1.17803	0.286265	0.543232	-0.391916	0.762117	0.0842635	1.07436	0.0596507
H3BV90	Fe-S cluster assembly protein DRE2	CIAPIN1	CIAPIN1	26,446	-0.0643363	0.956385	0.389695	0.409275	0.0666493	1.04728	0.373201	0.428057	-0.0288569	0.980197	0.697486	0.156465	0.0770307	1.05484	0.304989	0.515715	0.0804159	1.05732	0.284793	0.545471	0.130986	1.09504	0.159328	0.797707	0.0354794	1.0249	0.696376	0.157156	0.141367	1.10295	0.130319	0.884993	0.144752	1.10554	0.121868	0.914112	-0.0955063	0.935944	0.299222	0.524007	0.0103814	1.00722	0.908936	0.0414667	0.0137665
H7BY36	RNA-binding protein EWS (Fragment)	EWSR1	EWSR1	32,182	0.255852	1.19404	0.00234936	2.62905	-0.0140516	0.990307	0.850376	0.070389	0.382076	1.30322	4.30662e-05	4.36586	-0.0836425	0.943672	0.268725	0.570692	0.011991	1.00835	0.872098	0.0594348	-0.269904	0.829375	0.0070935	2.14914	0.126224	1.09143	0.176302	0.753742	-0.339495	0.790318	0.00119477	2.92272	-0.243861	0.844482	0.0135016	1.86962	0.396128	1.31597	0.000273732	3.56267	-0.0695909	0.952908	0.448692	0.348052	0.0260426
H7BYY1	Tropomyosin 1 (Alpha), isoform CRA_m (Tropomyosin alpha-1 chain)	TPM1 hCG_33495	TPM1	28,747	0.802868	1.74457	1.9964e-05	4.69975	0.00503446	1.0035	0.972661	0.0120386	1.09949	2.14279	2.55733e-07	6.59221	-0.830974	0.56215	1.29201e-05	4.88873	-0.153693	0.898946	0.301997	0.519998	-0.797833	0.575212	0.000220876	3.65585	0.296621	1.22826	0.11054	0.956482	-1.63384	0.322229	1.20424e-08	7.91929	-0.956561	0.515284	2.8073e-05	4.55171	1.09445	2.13532	4.97507e-06	5.3032	-0.836008	0.560191	0.000133819	3.87348	-0.158727
H7C003	Protein phosphatase 1 regulatory subunit 7 (Fragment)	PPP1R7	PPP1R7	38,745	0.0147252	1.01026	0.844557	0.0733712	0.0839939	1.05995	0.270565	0.567728	0.299263	1.23052	0.000639194	3.19437	-0.154122	0.898679	0.0506338	1.29556	0.0468184	1.03298	0.534827	0.271787	0.0692687	1.04918	0.454398	0.342563	0.284538	1.21802	0.00520208	2.28382	-0.168847	0.889553	0.0776365	1.10993	0.0320932	1.02249	0.727432	0.138207	0.215269	1.16092	0.0278442	1.55527	-0.238116	0.847852	0.016264	1.78877	-0.0371755
H7C0E5	Zinc finger protein ZPR1 (Fragment)	ZPR1	ZPR1	42,654	0.0185175	1.01292	0.866452	0.0622556	-0.119269	0.920654	0.285566	0.544294	0.0018121	1.00126	0.986865	0.00574205	0.159772	1.11711	0.157124	0.803758	-0.000326854	0.999773	0.997631	0.00103016	-0.137786	0.908913	0.313026	0.50442	-0.0167054	0.988487	0.901401	0.0450819	0.141254	1.10286	0.301315	0.520979	-0.0188444	0.987023	0.88886	0.0511667	0.121081	1.08755	0.373922	0.427219	0.279041	1.21339	0.0489551	1.3102	0.118942
H7C2Q8	EBNA1 binding protein 2, isoform CRA_d (Probable rRNA-processing protein EBP2)	EBNA1BP2 hCG_2031782	EBNA1BP2	40,684	-0.123373	0.918039	0.0271165	1.56677	0.0274551	1.01921	0.601647	0.220658	-0.268369	0.830258	4.41875e-05	4.3547	0.250794	1.18986	9.66495e-05	4.0148	0.00963508	1.0067	0.854203	0.0684391	0.150828	1.11021	0.0273624	1.56285	-0.144996	0.904382	0.0331517	1.47949	0.374166	1.29609	8.76474e-06	5.05726	0.133008	1.09658	0.048731	1.31219	-0.295824	0.814607	0.000146427	3.83438	0.223339	1.16743	0.0021233	2.67299	-0.01782
H7C3I5	Quinone oxidoreductase-like protein 1 (Fragment)	CRYZL1	CRYZL1	26,286	-0.166249	0.891157	0.18042	0.743715	0.143098	1.10427	0.246208	0.608698	0.111366	1.08025	0.363622	0.439349	-0.172045	0.887584	0.16636	0.778951	-0.0887276	0.940352	0.467496	0.330222	0.309347	1.23915	0.0477409	1.32111	0.277615	1.21219	0.0729715	1.13685	-0.00579562	0.995991	0.968883	0.0137288	0.0775215	1.0552	0.603057	0.219641	-0.0317317	0.978245	0.830966	0.0804168	-0.315143	0.803772	0.0440915	1.35565	-0.231825
H7C3P4	N-acetylglucosamine-6-sulfatase (EC 3.1.6.14) (Glucosamine-6-sulfatase)	GNS hCG_1640559	GNS	56,374	0.232657	1.175	0.00808624	2.09225	0.198378	1.14741	0.0209216	1.6794	0.367953	1.29052	0.000152967	3.8154	-0.0397705	0.97281	0.620896	0.206981	0.111545	1.08038	0.174138	0.759106	-0.0342794	0.976519	0.72738	0.138238	0.135296	1.09832	0.178144	0.749228	-0.272428	0.827925	0.0107852	1.96717	-0.121112	0.919479	0.226002	0.645888	0.169575	1.12473	0.0955674	1.01969	-0.238149	0.847833	0.0232584	1.63342	-0.0868325
H7C5G1	Isoamyl acetate-hydrolyzing esterase 1 homolog (Fragment)	IAH1	IAH1	25,197	0.240955	1.18177	0.16275	0.788478	-0.155455	0.897849	0.360963	0.442537	-0.124871	0.917086	0.461401	0.335922	0.208994	1.15588	0.223228	0.651252	-0.117479	0.921797	0.488006	0.311575	-0.39641	0.759746	0.0657083	1.18238	-0.365826	0.776024	0.0874932	1.05803	-0.0319609	0.97809	0.876867	0.0570664	-0.358434	0.780011	0.0936184	1.02864	0.0305842	1.02143	0.882128	0.0544685	0.36445	1.28739	0.0886069	1.05253	0.0379763
H7C5L9	28S ribosomal protein S22, mitochondrial (Fragment)	MRPS22	MRPS22	14,721	0.124482	1.09012	0.517715	0.285909	0.00491901	1.00342	0.979498	0.00899624	0.086729	1.06196	0.651329	0.1862	0.111979	1.08071	0.56024	0.251626	0.367432	1.29005	0.0660704	1.17999	-0.119563	0.920466	0.611221	0.213801	-0.037753	0.974171	0.872106	0.0594308	-0.0125031	0.991371	0.957468	0.0188755	0.24295	1.18341	0.306496	0.513575	0.08181	1.05834	0.72752	0.138155	0.10706	1.07703	0.648773	0.187907	0.362513
I1E4Y6	GRB10-interacting GYF protein 2	GIGYF2	GIGYF2	152,528	-0.00559955	0.996126	0.952002	0.0213622	-0.114143	0.923931	0.228378	0.641345	0.00308319	1.00214	0.97356	0.0116375	0.0532263	1.03758	0.568789	0.245049	-0.0216543	0.985102	0.816051	0.0882827	-0.108543	0.927524	0.346176	0.460703	0.00868274	1.00604	0.939255	0.0272166	0.0588259	1.04162	0.606827	0.216935	-0.0160548	0.988933	0.887961	0.051606	0.117226	1.08465	0.309858	0.508837	0.167369	1.12301	0.152403	0.817008	0.0924885
I3L0H8	ATP-dependent RNA helicase DDX19A	DDX19A	DDX19A	50,520	-0.103549	0.93074	0.0474093	1.32414	-0.0745028	0.949669	0.144228	0.84095	-0.31633	0.80311	2.64502e-06	5.57757	0.143728	1.10476	0.00822312	2.08496	-0.00945084	0.993471	0.8491	0.0710413	0.0290465	1.02034	0.633853	0.198012	-0.212781	0.862872	0.00202592	2.69338	0.247277	1.18696	0.000528702	3.27679	0.0940985	1.0674	0.132743	0.87699	-0.241827	0.845673	0.000654093	3.18436	0.218231	1.16331	0.00164016	2.78511	0.065052
I3L0N3	Vesicle-fusing ATPase	NSF	NSF	82,092	0.0924698	1.06619	0.101496	0.99355	0.0433171	1.03048	0.430846	0.365678	0.0173884	1.01213	0.750248	0.124795	0.0462881	1.0326	0.400434	0.397469	0.0430504	1.03029	0.433644	0.362866	-0.0491527	0.966504	0.464994	0.332552	-0.0750814	0.949289	0.268605	0.570886	-0.0461817	0.968496	0.492067	0.307976	-0.0494194	0.966325	0.462608	0.334786	-0.0259287	0.982188	0.698525	0.155818	0.002971	1.00206	0.964535	0.0156818	-0.000266673
I3L0U5	Coiled-coil domain-containing protein 137 (Fragment)	CCDC137	CCDC137	33,525	0.0461533	1.03251	0.82591	0.0830675	-0.146669	0.903333	0.486978	0.312491	-0.0859671	0.942153	0.682488	0.165905	-0.00690645	0.995224	0.973728	0.0115625	0.138735	1.10094	0.510576	0.29194	-0.192823	0.874892	0.455984	0.341051	-0.13212	0.912489	0.608161	0.215982	-0.0530598	0.96389	0.836418	0.0775769	0.0925819	1.06628	0.718938	0.143308	0.0607024	1.04297	0.813294	0.0897526	0.139763	1.10172	0.587719	0.23083	0.285405
I3L2C7	Gem-associated protein 4	GEMIN4	GEMIN4	118,822	0.0605063	1.04283	0.664583	0.177451	0.139264	1.10134	0.323149	0.490597	0.0629468	1.0446	0.651993	0.185757	0.0433972	1.03054	0.755535	0.121745	0.10301	1.07401	0.462409	0.334974	0.0787574	1.05611	0.645031	0.190419	0.00244054	1.00169	0.98858	0.00498839	-0.0171091	0.988211	0.92008	0.0361746	0.0425041	1.0299	0.803288	0.0951285	-0.0763168	0.948476	0.655255	0.18359	-0.0958665	0.93571	0.575459	0.239986	-0.0362533
I3L2L5	Mapk-regulated corepressor-interacting protein 1	MCRIP1	MCRIP1	10,463	0.331686	1.25848	0.0487843	1.31172	0.12664	1.09175	0.432589	0.363925	0.398302	1.31796	0.020343	1.69159	-0.0278808	0.98086	0.861815	0.0645858	0.457025	1.37271	0.00901446	2.04506	-0.205045	0.867511	0.302285	0.519584	0.0666159	1.04726	0.734452	0.134037	-0.359567	0.779399	0.0780817	1.10745	0.125339	1.09076	0.524849	0.279965	0.271661	1.2072	0.175964	0.754577	-0.154521	0.89843	0.434288	0.362222	0.330385
I3L2R6	Thioredoxin domain-containing protein 17	TXNDC17	TXNDC17	11,292	-0.0404082	0.97238	0.506043	0.295813	0.0272007	1.01903	0.653415	0.184811	0.0409526	1.02879	0.500394	0.300688	-0.139032	0.908129	0.0303398	1.51799	-0.0272514	0.981288	0.652814	0.18521	0.0676089	1.04798	0.365915	0.436619	0.0813608	1.05802	0.278754	0.554779	-0.0986234	0.933924	0.192208	0.716228	0.0131568	1.00916	0.858945	0.0660347	0.0137519	1.00958	0.852641	0.0692336	-0.166232	0.891167	0.0340349	1.46807	-0.0544521
I3VM54	Lysine-specific demethylase 2A (N-terminus deleted lysine-specific demethylase 2A)	KDM2A	KDM2A	130,660	-0.556828	0.679795	6.70731e-06	5.17345	-0.183736	0.88042	0.0606554	1.21713	-0.540308	0.687624	9.95833e-06	5.00181	-0.150102	0.901187	0.12002	0.920745	-0.277394	0.82508	0.0070347	2.15275	0.373092	1.29513	0.00359482	2.44432	0.0165208	1.01152	0.885445	0.0528382	0.406727	1.32567	0.00180722	2.74299	0.279435	1.21372	0.0226743	1.64447	-0.356571	0.781019	0.00502104	2.29921	0.0336346	1.02359	0.76947	0.113808	-0.0936571
J3KMX2	SWI/SNF-related matrix-associated actin-dependent regulator of chromatin subfamily D member 2	SMARCD2	SMARCD2	52,238	-0.270267	0.829166	0.223362	0.650992	-0.498884	0.707654	0.0310149	1.50843	-0.466369	0.723784	0.0423173	1.37348	-0.468347	0.722793	0.0415347	1.38159	-0.907912	0.532956	0.000415045	3.3819	-0.228617	0.853452	0.395759	0.402569	-0.196101	0.872906	0.465278	0.332288	-0.198079	0.87171	0.46085	0.336441	-0.637645	0.642761	0.0250855	1.60058	0.0325158	1.02279	0.903	0.0443124	0.030538	1.02139	0.908871	0.0414976	-0.409028
J3KN29	26S proteasome non-ATPase regulatory subunit 9	PSMD9	PSMD9	24,554	0.128344	1.09304	0.0438066	1.35846	-0.0707045	0.952173	0.249842	0.602334	0.0507341	1.03579	0.405183	0.392349	0.0113427	1.00789	0.85114	0.0699991	0.104635	1.07522	0.0947194	1.02356	-0.199048	0.871125	0.0130324	1.88497	-0.0776098	0.947626	0.300815	0.5217	-0.117001	0.922102	0.124953	0.903253	-0.0237093	0.9837	0.748958	0.125543	0.121439	1.08782	0.112063	0.950537	0.0820472	1.05852	0.274773	0.561026	0.175339
J3KN36	Nodal modulator 3	NOMO3	NOMO3	139,381	-0.294116	0.815572	0.00135869	2.86688	-0.119415	0.920561	0.147063	0.832497	-0.675096	0.62629	4.092e-08	7.38806	0.0402336	1.02828	0.616894	0.209789	-0.258298	0.836074	0.00387771	2.41142	0.174701	1.12873	0.0866322	1.06232	-0.38098	0.767916	0.000823254	3.08447	0.33435	1.26081	0.00252732	2.59734	0.035818	1.02514	0.715729	0.145252	-0.555681	0.680336	1.28481e-05	4.89116	0.159649	1.11702	0.11524	0.938398	-0.138883
J3KNN5	Deleted.	0	0	0	-0.265927	0.831664	0.0100202	1.99912	0.0723868	1.05145	0.448062	0.348662	-0.163147	0.893075	0.0964262	1.0158	-0.0636736	0.956825	0.503862	0.297689	-0.094855	0.936366	0.322647	0.491273	0.338314	1.26428	0.0078327	2.10609	0.10278	1.07384	0.380299	0.419875	0.202254	1.15049	0.0926942	1.03295	0.171072	1.12589	0.150926	0.821235	-0.235534	0.849371	0.0530172	1.27558	-0.13606	0.910001	0.248853	0.604058	-0.167242
J3KP58	CAP-Gly domain-containing linker protein 1	CLIP1	CLIP1	148,129	0.135538	1.0985	0.0979622	1.00894	-0.0671223	0.95454	0.400238	0.397682	0.0403224	1.02834	0.611291	0.213752	-0.0185168	0.987247	0.81499	0.0888479	0.0403732	1.02838	0.610845	0.214069	-0.20266	0.868947	0.0467543	1.33018	-0.0952158	0.936132	0.331362	0.479697	-0.154055	0.898721	0.122861	0.910586	-0.0951649	0.936165	0.331615	0.479366	0.107445	1.07732	0.274558	0.561366	0.0486054	1.03426	0.61689	0.209793	0.107495
J3KPM9	Signal transducer and activator of transcription	STAT1	STAT1	83,360	-0.0186764	0.987138	0.793433	0.10049	-0.0438587	0.970057	0.540182	0.26746	-0.0991	0.933615	0.174382	0.758499	0.158046	1.11577	0.0361195	1.44226	-0.0445536	0.96959	0.533844	0.272586	-0.0251823	0.982696	0.773171	0.111724	-0.0804236	0.94578	0.361885	0.44143	0.176722	1.13031	0.0536049	1.2708	-0.0258772	0.982223	0.767103	0.115146	-0.0552412	0.962433	0.52885	0.276667	0.201904	1.15022	0.0295554	1.52936	-0.00069491
J3KPP4	Cisplatin resistance-associated overexpressed protein, isoform CRA_b (Luc7-like protein 3)	LUC7L3 CROP hCG_27416	LUC7L3	58,220	0.131741	1.09561	0.062994	1.2007	-0.0433194	0.97042	0.524854	0.279961	-0.0955806	0.935896	0.168666	0.772972	0.165483	1.12154	0.0224722	1.64835	0.0266734	1.01866	0.694481	0.15834	-0.17506	0.885731	0.0452122	1.34474	-0.227321	0.854219	0.0116983	1.93188	0.0337419	1.02366	0.685007	0.164305	-0.105067	0.929762	0.214567	0.668437	-0.0522612	0.964424	0.531014	0.274894	0.208802	1.15573	0.0191486	1.71786	0.0699928
J3KQ32	Obg-like ATPase 1	OLA1	OLA1	46,938	0.0531392	1.03752	0.206902	0.684235	-0.0205315	0.985869	0.619813	0.207739	-0.0600554	0.959227	0.155983	0.806923	0.130694	1.09482	0.00439462	2.35708	0.0656244	1.04654	0.122849	0.910629	-0.0736707	0.950217	0.155352	0.808684	-0.113195	0.924539	0.0344679	1.46258	0.0775546	1.05523	0.13575	0.867259	0.0124852	1.00869	0.804981	0.0942144	-0.0395239	0.972976	0.437596	0.358926	0.151225	1.11051	0.00657607	2.18203	0.0861559
J3KQ34	COP9 signalosome complex subunit 7b	COPS7B	COPS7B	26,424	0.169784	1.12489	0.495624	0.304847	-0.864196	0.549352	0.00207663	2.68264	0.0483929	1.03411	0.845182	0.0730497	-0.0105897	0.992687	0.965901	0.0150675	-0.250356	0.840689	0.318299	0.497165	-1.03398	0.488361	0.00250925	2.60046	-0.121391	0.919301	0.689656	0.161367	-0.180373	0.882475	0.55391	0.256561	-0.420139	0.747352	0.176099	0.754244	0.912589	1.88242	0.00635168	2.19711	0.853607	1.80701	0.00988198	2.00516	0.61384
J3KQY1	39S ribosomal protein L22, mitochondrial	MRPL22	MRPL22	26,475	-0.0450411	0.969262	0.714756	0.145842	0.231438	1.174	0.0712182	1.14741	-0.075912	0.948742	0.539169	0.268275	0.0111004	1.00772	0.928116	0.0323978	0.115638	1.08345	0.352563	0.452764	0.276479	1.21124	0.0778912	1.10851	-0.0308709	0.978829	0.837754	0.0768833	0.0561415	1.03968	0.709944	0.148776	0.160679	1.11781	0.293057	0.533048	-0.30735	0.808125	0.0520228	1.28381	-0.220338	0.858364	0.154212	0.811881	-0.115801
J3KR97	Tubulin-specific chaperone D	TBCD	TBCD	136,551	-0.0432832	0.970444	0.754141	0.122547	-0.135951	0.91007	0.330492	0.480839	-0.00980873	0.993224	0.943353	0.025326	0.103588	1.07444	0.45616	0.340882	-0.0650071	0.955941	0.638612	0.194763	-0.0926679	0.937787	0.585008	0.232838	0.0334745	1.02347	0.843114	0.0741139	0.146871	1.10717	0.389439	0.40956	-0.0217239	0.985055	0.897772	0.0468337	0.126142	1.09137	0.458707	0.338465	0.239539	1.18062	0.166747	0.777942	0.070944
J3KS22	L-xylulose reductase (Fragment)	DCXR	DCXR	23,804	0.0502618	1.03545	0.701845	0.153759	-0.0249115	0.982881	0.849301	0.0709385	-0.12753	0.915397	0.336158	0.473456	0.0299406	1.02097	0.819395	0.0865067	0.0282533	1.01978	0.829399	0.0812364	-0.0751733	0.949228	0.640442	0.193521	-0.177792	0.884055	0.275238	0.560292	-0.0203212	0.986013	0.899266	0.0461117	-0.0220085	0.984861	0.890957	0.0501434	-0.102619	0.931341	0.52471	0.280081	0.054852	1.03875	0.732909	0.13495	0.0531648
J3KSI8	28S ribosomal protein S7, mitochondrial (Fragment)	MRPS7	MRPS7	18,386	-0.133804	0.911425	0.0956548	1.01929	0.140448	1.10225	0.0813163	1.08982	-0.173687	0.886574	0.0343873	1.4636	0.16808	1.12356	0.0399653	1.39832	0.114962	1.08295	0.148602	0.827976	0.274252	1.20937	0.00832077	2.07984	-0.0398829	0.972734	0.674999	0.170697	0.301884	1.23275	0.00426481	2.3701	0.248766	1.18819	0.0151848	1.81859	-0.314135	0.804333	0.00315822	2.50056	0.027632	1.01934	0.771176	0.112847	-0.0254861
J3KSL8	Trafficking protein particle complex subunit 8	TRAPPC8	TRAPPC8	104,244	-0.24743	0.842396	0.415378	0.381556	-0.152939	0.899417	0.612825	0.212663	0.219806	1.16458	0.468569	0.329226	-1.20067	0.435074	0.00064067	3.19337	-0.22168	0.857566	0.464836	0.3327	0.0944914	1.06769	0.798028	0.0979816	0.467236	1.38246	0.214335	0.668908	-0.953236	0.516473	0.016492	1.78273	0.0257499	1.01801	0.944362	0.0248617	0.372745	1.29481	0.318485	0.496912	-1.04773	0.483729	0.0093165	2.03075	-0.0687414
J3KTF8	Rho GDP-dissociation inhibitor 1 (Fragment)	ARHGDIA	ARHGDIA	21,517	-0.0608367	0.958708	0.152936	0.815492	-0.0888535	0.94027	0.0421935	1.37475	0.0939958	1.06732	0.0326115	1.48663	-0.236997	0.84851	1.1325e-05	4.94596	-0.169921	0.888891	0.000491157	3.30878	-0.0280168	0.980768	0.582641	0.234599	0.154832	1.11329	0.00578787	2.23748	-0.176161	0.885055	0.0021779	2.66196	-0.109085	0.927176	0.0417488	1.37936	0.182849	1.13512	0.00159691	2.79672	-0.148144	0.902411	0.00782219	2.10667	-0.0810679
J3KTL2	Serine/arginine-rich-splicing factor 1 (Splicing factor, arginine/serine-rich 1 (Splicing factor 2, alternate splicing factor), isoform CRA_g)	SRSF1 SFRS1 hCG_1774411	SRSF1	28,329	0.102308	1.07349	0.02135	1.6706	0.0392424	1.02757	0.349704	0.456299	0.128494	1.09315	0.00518549	2.28521	-0.00245714	0.998298	0.952787	0.0210042	0.0854367	1.06101	0.0500626	1.30049	-0.0630651	0.957228	0.223387	0.650942	0.0261863	1.01832	0.607602	0.216381	-0.104765	0.929957	0.0498113	1.30267	-0.0168708	0.988374	0.740286	0.1306	0.0892515	1.06382	0.0905207	1.04325	-0.0416996	0.97151	0.41589	0.381021	0.0461943
J3QK89	Calcium homeostasis endoplasmic reticulum protein	CHERP	CHERP	104,934	-0.10016	0.93293	0.219539	0.658489	0.293153	1.22531	0.00137608	2.86136	0.0879835	1.06288	0.278751	0.554784	0.15196	1.11108	0.0687951	1.16244	0.090035	1.0644	0.268025	0.571825	0.393312	1.31341	0.00060055	3.22145	0.188143	1.1393	0.0660599	1.18006	0.25212	1.19096	0.0169067	1.77194	0.190195	1.14092	0.0633948	1.19795	-0.205169	0.867437	0.0466742	1.33092	-0.141192	0.90677	0.160113	0.795573	-0.203118
J3QL14	V-type proton ATPase subunit d 1 (Fragment)	ATP6V0D1	ATP6V0D1	26,817	-0.171475	0.887934	0.356105	0.448422	-0.13608	0.909989	0.462194	0.335175	-0.0859674	0.942153	0.640933	0.193188	-0.390006	0.763127	0.0440461	1.35609	-0.186172	0.878935	0.317307	0.49852	0.0353953	1.02484	0.875107	0.0579388	0.0855074	1.06106	0.704593	0.152061	-0.218531	0.85944	0.33736	0.471907	-0.014697	0.989865	0.947951	0.023214	0.0501121	1.03535	0.823959	0.0840943	-0.253926	0.838611	0.266852	0.57373	-0.0500923
J3QLE5	Small nuclear ribonucleoprotein-associated protein N (Fragment)	SNRPN	SNRPN	17,546	0.171915	1.12655	0.00706241	2.15105	0.12859	1.09322	0.0363077	1.44	0.256038	1.19419	0.00023356	3.6316	0.123826	1.08962	0.0430182	1.36635	0.1447	1.1055	0.0201117	1.69655	-0.0433249	0.970416	0.544123	0.264303	0.0841232	1.06004	0.244796	0.611197	-0.0480892	0.967217	0.50122	0.299972	-0.0272149	0.981313	0.702379	0.153429	0.127448	1.09236	0.0844332	1.07349	-0.00476429	0.996703	0.946571	0.0238467	0.0161099
J3QLR8	28S ribosomal protein S23, mitochondrial	MRPS23	MRPS23	17,517	-0.122372	0.918676	0.33232	0.478444	0.220205	1.1649	0.088917	1.05102	-0.0982048	0.934195	0.434641	0.361869	0.043648	1.03072	0.726783	0.138595	-0.0717846	0.95146	0.56655	0.246762	0.342577	1.26802	0.0342996	1.46471	0.0241671	1.01689	0.874335	0.0583222	0.16602	1.12196	0.284149	0.546454	0.0505873	1.03569	0.740871	0.130257	-0.31841	0.801953	0.0475294	1.32304	-0.176557	0.884812	0.255579	0.592475	-0.291989
J3QQ67	60S ribosomal protein L18 (Fragment)	RPL18	RPL18	21,840	-0.112516	0.924974	0.0145025	1.83856	-0.0448187	0.969412	0.299255	0.523959	-0.196524	0.872651	0.000144381	3.84049	-0.104586	0.930072	0.0217961	1.66162	-0.180117	0.882632	0.000359317	3.44452	0.0676974	1.04804	0.203591	0.691241	-0.084008	0.943433	0.1185	0.926283	0.00793034	1.00551	0.87919	0.0559171	-0.0676007	0.954224	0.204212	0.689919	-0.151705	0.900186	0.00797314	2.09837	-0.0597671	0.959419	0.259558	0.585766	-0.135298
J3QQJ0	SAP30-binding protein (Fragment)	SAP30BP	SAP30BP	35,884	-0.18701	0.878424	0.275152	0.560428	-0.0225461	0.984494	0.893761	0.0487785	0.227317	1.17066	0.187757	0.726404	0.0858734	1.06133	0.61208	0.213192	-0.0190021	0.986915	0.910378	0.0407783	0.164464	1.12075	0.429933	0.366599	0.414327	1.33268	0.05586	1.2529	0.272884	1.20822	0.196286	0.707111	0.168008	1.12351	0.42022	0.376523	0.249863	1.18909	0.235165	0.628627	0.10842	1.07805	0.601215	0.22097	0.00354399
J3QQZ9	Pyridoxine-5'-phosphate oxidase (Fragment)	PNPO	PNPO	27,312	0.119448	1.08632	0.103111	0.986696	0.217746	1.16292	0.00545608	2.26312	0.258421	1.19617	0.00142473	2.84627	0.0527853	1.03727	0.45925	0.337951	0.224349	1.16825	0.00439902	2.35664	0.0982982	1.07051	0.264707	0.577234	0.138974	1.10112	0.120349	0.919557	-0.0666623	0.954845	0.44558	0.351074	0.104901	1.07542	0.234945	0.629033	0.0406757	1.0286	0.640071	0.193772	-0.164961	0.891953	0.0684296	1.16476	0.00660323
J3QR09	Ribosomal protein L19	RPL19	RPL19	23,135	-0.0500283	0.965917	0.29662	0.5278	-0.0848716	0.942868	0.0840138	1.07565	-0.166099	0.89125	0.0019587	2.70803	-0.0931597	0.937467	0.0597247	1.22385	-0.137154	0.909311	0.00810369	2.09132	-0.0348433	0.976138	0.549119	0.260333	-0.11607	0.922698	0.055804	1.25333	-0.0431315	0.970546	0.459418	0.337792	-0.0871261	0.941396	0.143156	0.844191	-0.0812269	0.945253	0.170774	0.767578	-0.00828812	0.994272	0.886199	0.0524689	-0.0522828
J3QRD1	Aldehyde dehydrogenase family 3 member A2	ALDH3A2	ALDH3A2	44,648	-0.276162	0.825785	0.0429524	1.36701	-0.23684	0.848602	0.078601	1.10457	-0.288342	0.818843	0.0353531	1.45157	-0.102989	0.931102	0.429789	0.366744	-0.385603	0.765459	0.00677844	2.16887	0.0393215	1.02763	0.804212	0.0946296	-0.0121801	0.991593	0.938748	0.0274508	0.173173	1.12754	0.281663	0.550271	-0.109441	0.926947	0.492472	0.307618	-0.0515016	0.964931	0.745553	0.127521	0.133851	1.09722	0.402579	0.395149	-0.148763
J3QRS3	Myosin regulatory light chain 12A (Myosin regulatory light chain MRCL3, isoform CRA_b)	MYL12A MRCL3 hCG_2045956	MYL12A	20,457	0.41926	1.33724	0.00014915	3.82638	-0.0606877	0.958807	0.507806	0.294302	0.696507	1.62058	1.85977e-07	6.73054	-0.552018	0.682065	5.26624e-06	5.2785	-0.147949	0.902532	0.115747	0.936492	-0.479947	0.717004	0.000303641	3.51764	0.277247	1.21188	0.0204988	1.68827	-0.971278	0.510054	2.41176e-08	7.61767	-0.567209	0.674921	4.83044e-05	4.31601	0.757194	1.6902	1.09017e-06	5.96251	-0.49133	0.711369	0.000238449	3.6226	-0.0872616
J3QRS9	BUB3-interacting and GLEBS motif-containing protein ZNF207	ZNF207	ZNF207	52,542	0.205376	1.15299	0.000254063	3.59506	0.152207	1.11127	0.00369397	2.43251	0.233282	1.17551	6.27097e-05	4.20267	0.0731508	1.05201	0.130173	0.88548	0.240513	1.18141	4.38233e-05	4.3583	-0.0531691	0.963817	0.360148	0.443519	0.0279062	1.01953	0.628392	0.201769	-0.132225	0.912423	0.0303974	1.51716	0.0351371	1.02465	0.542956	0.265235	0.0810753	1.05781	0.168644	0.773029	-0.0790563	0.946677	0.179002	0.747142	0.0883062
J9JIC5	Protein Njmu-R1	C17orf75	C17orf75	44,609	0.193349	1.14341	0.710066	0.148702	0.351428	1.27582	0.500932	0.300221	1.12287	2.17779	0.0404808	1.39275	0.0684098	1.04856	0.89519	0.0480846	0.385388	1.30621	0.460995	0.336304	0.15808	1.1158	0.803811	0.094846	0.929516	1.90464	0.154326	0.81156	-0.124939	0.917043	0.844301	0.0735029	0.19204	1.14238	0.762901	0.117532	0.771437	1.70697	0.233469	0.631772	-0.283018	0.82187	0.657048	0.182403	0.0339599
K4DI81	Ubiquitin-conjugating enzyme E2 C (Ubiquitin-conjugating enzyme E2C, isoform CRA_d)	UBE2C hCG_38372	UBE2C	5,117	-0.966663	0.511688	0.000231513	3.63542	-1.01981	0.493182	0.000130502	3.88438	-1.4654	0.362134	1.32523e-06	5.87771	-0.362329	0.777908	0.109321	0.961298	-1.07285	0.47538	7.39075e-05	4.13131	-0.0531454	0.963833	0.842986	0.0741798	-0.498742	0.707724	0.0742362	1.12938	0.604334	1.52028	0.0335258	1.47462	-0.106184	0.929042	0.692718	0.159443	-0.445596	0.734281	0.107953	0.966766	0.657479	1.57732	0.0219888	1.6578	-0.0530391
K7EIU8	Mothers against decapentaplegic homolog (MAD homolog) (Mothers against DPP homolog) (SMAD family member)	SMAD4	SMAD4	50,053	-0.158879	0.895721	0.104946	0.979033	-0.0986182	0.933927	0.304427	0.516516	-0.19264	0.875003	0.0527084	1.27812	-0.346867	0.78629	0.00138327	2.85909	-0.384738	0.765918	0.000536106	3.27075	0.0602605	1.04265	0.604773	0.218407	-0.0337615	0.97687	0.771329	0.112761	-0.187988	0.877829	0.116484	0.933733	-0.225859	0.855085	0.0626663	1.20297	-0.094022	0.936907	0.421608	0.375091	-0.248249	0.841918	0.0424835	1.37178	-0.28612
K7EJL1	AP-1 complex subunit mu-1	AP1M1	AP1M1	40,296	0.117005	1.08448	0.364266	0.438582	0.213048	1.15913	0.106414	0.973	0.154231	1.11283	0.235233	0.628501	0.183023	1.13526	0.161906	0.790738	0.456398	1.37211	0.00169015	2.77207	0.0960423	1.06884	0.540836	0.266934	0.0372258	1.02614	0.811886	0.0905047	0.0660174	1.04682	0.673451	0.171694	0.339393	1.26522	0.0397726	1.40042	-0.0588164	0.960051	0.707197	0.15046	-0.0300249	0.979403	0.847739	0.0717378	0.24335
K7EK07	Histone H3 (Fragment)	H3-3B	H3-3B	14,914	0.189758	1.14057	0.421311	0.375398	0.205426	1.15303	0.384664	0.414919	0.0697388	1.04953	0.765977	0.115784	0.143489	1.10457	0.541731	0.266217	0.139561	1.10157	0.552748	0.257473	0.0156678	1.01092	0.956411	0.0193554	-0.120019	0.920175	0.676106	0.169985	-0.0462695	0.968437	0.871805	0.0595807	-0.050197	0.965804	0.861038	0.0649778	-0.135687	0.910236	0.636904	0.195926	-0.0619373	0.957977	0.829025	0.0814322	-0.0658648
K7EKE6	Lon protease homolog, mitochondrial (EC 3.4.21.53) (Lon protease-like protein) (LONP) (Mitochondrial ATP-dependent protease Lon) (Serine protease 15)	LONP1	LONP1	95,180	-0.0171924	0.988154	0.848148	0.0715286	0.205347	1.15296	0.0311725	1.50623	-0.0310313	0.97872	0.729903	0.136735	0.0925961	1.06629	0.30856	0.51066	0.176245	1.12994	0.060539	1.21796	0.222539	1.16679	0.0536223	1.27065	-0.0138389	0.990453	0.899825	0.045842	0.109788	1.07907	0.323857	0.489647	0.193437	1.14348	0.0898625	1.04642	-0.236378	0.848874	0.0415136	1.38181	-0.112751	0.924823	0.311294	0.50683	-0.0291023
K7EKV4	Vacuolar protein-sorting-associated protein 25 (Fragment)	VPS25	VPS25	12,835	-0.0908619	0.938962	0.456711	0.340358	0.167488	1.1231	0.177067	0.751863	0.00906445	1.0063	0.940399	0.0266879	0.145736	1.10629	0.237602	0.624149	0.171262	1.12604	0.167941	0.774843	0.25835	1.19611	0.0932822	1.0302	0.0999263	1.07172	0.503352	0.298128	0.236598	1.17821	0.122209	0.912898	0.262124	1.19924	0.0889157	1.05102	-0.158424	0.896003	0.292751	0.533501	-0.0217521	0.985036	0.883551	0.0537684	0.00377386
K7ELJ7	Calpain small subunit 1	CAPNS1	CAPNS1	29,440	-0.300103	0.812194	0.00048763	3.31191	-0.0457609	0.968779	0.533799	0.272622	-0.074077	0.94995	0.317597	0.498123	-0.367187	0.775293	5.61636e-05	4.25054	-0.415065	0.749986	1.24981e-05	4.90316	0.254342	1.19279	0.00936206	2.02863	0.226026	1.16961	0.018888	1.72381	-0.0670835	0.954566	0.457362	0.33974	-0.114962	0.923407	0.208756	0.68036	-0.0283161	0.980564	0.75237	0.123569	-0.321426	0.800278	0.00165125	2.78219	-0.369304
K7ELL7	Glucosidase 2 subunit beta	PRKCSH	PRKCSH	60,192	0.0308222	1.02159	0.566834	0.246544	-0.0330505	0.977352	0.539384	0.268102	-0.118789	0.920961	0.0362218	1.44103	-0.000219862	0.999848	0.996727	0.00142388	-0.144721	0.904554	0.0127394	1.89485	-0.0638727	0.956693	0.336195	0.473409	-0.149611	0.901494	0.0317573	1.49816	-0.0310421	0.978713	0.637218	0.195712	-0.175543	0.885434	0.0134963	1.86978	-0.0857382	0.942302	0.200822	0.69719	0.0328306	1.02302	0.618063	0.208967	-0.11167
K7ENL9	Regulator of MON1-CCZ1 complex	RMC1	RMC1	69,389	0.123372	1.08928	0.549751	0.259834	0.330071	1.25708	0.119158	0.923875	0.0861944	1.06157	0.675319	0.170491	0.313712	1.2429	0.137454	0.861844	0.0234584	1.01639	0.909055	0.0414097	0.2067	1.15405	0.415047	0.381903	-0.0371772	0.97456	0.882503	0.0542839	0.190341	1.14103	0.452357	0.344519	-0.0999133	0.933089	0.691721	0.160069	-0.243877	0.844473	0.3378	0.47134	-0.0163588	0.988725	0.948135	0.0231297	-0.306613
K7EP90	RNA-binding protein 42	RBM42	RBM42	48,024	-0.0592604	0.959756	0.336885	0.472518	-0.00844514	0.994163	0.889893	0.050662	-0.0693801	0.953047	0.262895	0.580218	-0.150262	0.901087	0.0214202	1.66918	-0.14575	0.903909	0.0251173	1.60003	0.0508153	1.03585	0.498808	0.302066	-0.0101197	0.99301	0.892257	0.0495102	-0.0910012	0.938871	0.231589	0.635282	-0.0864895	0.941812	0.254736	0.593909	-0.0609349	0.958643	0.418499	0.378306	-0.141816	0.906377	0.0688324	1.16221	-0.137305
K7EQ55	DAZ-associated protein 1	DAZAP1	DAZAP1	43,312	-0.0464882	0.96829	0.658967	0.181136	0.155768	1.11401	0.148887	0.827145	0.0177391	1.01237	0.865982	0.062491	-0.169261	0.889298	0.11844	0.9265	0.0184083	1.01284	0.860981	0.0650062	0.202256	1.1505	0.127127	0.895763	0.0642273	1.04552	0.61882	0.208436	-0.122773	0.918421	0.345534	0.461509	0.0648964	1.04601	0.615194	0.210988	-0.138029	0.90876	0.290325	0.537116	-0.32503	0.798282	0.0187247	1.72759	-0.13736
K7ERA3	Endoplasmic reticulum protein SC65 (Fragment)	P3H4	P3H4	25,985	-0.216456	0.860677	0.255655	0.592346	-0.108204	0.927743	0.565123	0.247857	-0.272645	0.827801	0.156015	0.806834	-0.126763	0.915884	0.501028	0.300138	-0.173002	0.886995	0.360796	0.442738	0.108252	1.07792	0.637959	0.195207	-0.0561891	0.961801	0.806653	0.093313	0.0896929	1.06414	0.696372	0.157159	0.0434539	1.03058	0.849833	0.0706666	-0.164441	0.892274	0.476338	0.322084	-0.0185593	0.987218	0.935526	0.0289442	-0.0647983
K7ERP4	Glutathione peroxidase (Fragment)	GPX4	GPX4	17,629	0.977624	1.96922	2.20559e-09	8.65648	0.15298	1.11186	0.126841	0.896741	0.692548	1.61613	5.3881e-07	6.26856	0.592551	1.50791	4.87443e-06	5.31208	0.82057	1.7661	3.96779e-08	7.40145	-0.824644	0.564622	8.13814e-07	6.08947	-0.285076	0.820698	0.0249338	1.60321	-0.385073	0.76574	0.00378078	2.42242	-0.157054	0.896854	0.196794	0.705987	0.539568	1.45354	0.000176376	3.75356	0.439571	1.3562	0.00129092	2.8891	0.66759
K7ERQ7	Kinetochore protein Spc24 (Fragment)	SPC24	SPC24	13,596	-0.436704	0.738821	0.132816	0.876749	-0.522469	0.696179	0.0754986	1.12206	-1.31548	0.401791	0.000129531	3.88763	0.087764	1.06272	0.756137	0.121399	-0.729468	0.603126	0.0164653	1.78343	-0.0857655	0.942284	0.804208	0.0946316	-0.87878	0.543827	0.0180663	1.74313	0.524468	1.4384	0.140085	0.85361	-0.292764	0.816336	0.401278	0.396554	-0.793014	0.577137	0.0307908	1.51158	0.610233	1.52651	0.0889588	1.05081	-0.206999
K7ES31	Eukaryotic translation initiation factor 3 subunit K	EIF3K	EIF3K	15,875	-0.067363	0.954381	0.430257	0.366272	-0.0367482	0.97485	0.665254	0.177013	-0.0688955	0.953368	0.420009	0.376742	0.0941524	1.06744	0.2738	0.562566	-0.0621615	0.957828	0.46619	0.331437	0.0306148	1.02145	0.768233	0.114507	-0.00153248	0.998938	0.988218	0.00514731	0.161515	1.11846	0.13065	0.88389	0.00520154	1.00361	0.960025	0.0177173	-0.0321473	0.977964	0.757015	0.120896	0.130901	1.09498	0.216087	0.665371	-0.0254133
K7ES52	Thymidine kinase (EC 2.7.1.21)	TK1	TK1	19,786	-0.724529	0.605195	3.50102e-05	4.45581	-0.401041	0.757311	0.00831606	2.08008	-1.00399	0.498621	4.25686e-07	6.37091	-0.18268	0.881065	0.197469	0.7045	-0.635702	0.643627	0.000156285	3.80608	0.323487	1.25135	0.0682021	1.1662	-0.279457	0.823901	0.111443	0.952946	0.541848	1.45584	0.00419359	2.37741	0.0888264	1.0635	0.602479	0.220058	-0.602944	0.658409	0.00180809	2.74278	0.218361	1.16341	0.208011	0.681914	-0.234661
M0QY97	Zinc finger CCCH domain-containing protein 4 (Fragment)	ZC3H4	ZC3H4	95,538	0.0793154	1.05652	0.451135	0.345694	0.0457812	1.03224	0.662091	0.179082	0.0915722	1.06553	0.385442	0.414041	-0.190353	0.876391	0.0799141	1.09738	-0.118962	0.92085	0.262587	0.580727	-0.0335342	0.977024	0.79349	0.100458	0.0122568	1.00853	0.923716	0.0344615	-0.269669	0.82951	0.0453943	1.343	-0.198277	0.871591	0.132346	0.878289	0.045791	1.03225	0.720946	0.142097	-0.236135	0.849017	0.07639	1.11696	-0.164743
M0QZR4	Rho guanine nucleotide exchange factor 1	ARHGEF1	ARHGEF1	108,324	-0.128587	0.914727	0.386628	0.412706	-0.142434	0.905989	0.338597	0.470317	-0.0409933	0.971985	0.780729	0.107499	-0.266353	0.831419	0.0816247	1.08818	-0.241726	0.845733	0.111686	0.952001	-0.0138466	0.990448	0.938749	0.0274505	0.0875939	1.0626	0.627894	0.202114	-0.137765	0.908926	0.447845	0.348872	-0.113139	0.924574	0.532097	0.274009	0.101441	1.07284	0.574971	0.240354	-0.123919	0.917692	0.494183	0.306112	-0.0992921
M0R0F0	40S ribosomal protein S5 (Fragment)	RPS5	RPS5	22,391	-0.344323	0.787678	2.22311e-06	5.65304	-0.111601	0.92556	0.0468917	1.3289	-0.262417	0.83369	7.09933e-05	4.14878	-0.131051	0.913166	0.0218089	1.66137	-0.361682	0.778257	1.1078e-06	5.95554	0.232722	1.17505	0.00175468	2.7558	0.0819057	1.05842	0.219028	0.6595	0.213272	1.15931	0.00352567	2.45276	-0.0173593	0.98804	0.790751	0.10196	-0.150816	0.900741	0.0299394	1.52376	-0.0194504	0.986608	0.766291	0.115606	-0.250081
M0R0N4	AP complex subunit sigma	AP2S1	AP2S1	17,303	0.130051	1.09433	0.210116	0.677541	0.0229932	1.01607	0.821267	0.0855159	0.297257	1.22881	0.00772233	2.11225	0.00366084	1.00254	0.971289	0.0126515	0.0408691	1.02873	0.688425	0.162144	-0.107058	0.92848	0.394479	0.403976	0.167206	1.12288	0.189174	0.723139	-0.12639	0.916121	0.316478	0.499657	-0.0891819	0.940056	0.476883	0.321588	0.274264	1.20938	0.0373539	1.42766	-0.0193324	0.986689	0.876707	0.0571453	0.0178759
M0R0Q7	DNA ligase (EC 6.5.1.1)	LIG1	LIG1	88,387	-0.41453	0.750264	0.000664564	3.17746	-0.1982	0.871637	0.0688728	1.16195	-0.392362	0.761881	0.0010997	2.95873	-0.182962	0.880893	0.0911494	1.04025	-0.36435	0.776819	0.00207229	2.68355	0.21633	1.16177	0.102097	0.990987	0.0221685	1.01548	0.862418	0.0642822	0.231568	1.17411	0.0815541	1.08855	0.0501798	1.03539	0.695313	0.15782	-0.194162	0.874081	0.139778	0.85456	0.0152382	1.01062	0.90516	0.0432745	-0.16615
M0R1C6	Upstream stimulatory factor 2 (Fragment)	USF2	USF2	15,685	0.00250474	1.00174	0.985492	0.00634709	-0.194056	0.874144	0.16906	0.771958	-0.252911	0.839201	0.0776966	1.1096	-0.374558	0.771342	0.012211	1.91325	-0.069643	0.952874	0.614269	0.211641	-0.196561	0.872628	0.251859	0.598843	-0.255416	0.837746	0.140849	0.851247	-0.377063	0.770004	0.0348363	1.45797	-0.0721477	0.951221	0.669602	0.174184	-0.0588546	0.960026	0.727581	0.138119	-0.180501	0.882396	0.291459	0.535422	0.124414
M0R1S3	Probable ATP-dependent RNA helicase DDX49	DDX49	DDX49	11,720	-0.333376	0.793677	0.0798041	1.09797	-0.185216	0.879518	0.317507	0.498247	-0.180044	0.882676	0.330876	0.480335	-0.00905612	0.993742	0.960521	0.017493	0.0512186	1.03614	0.77972	0.108062	0.148161	1.10816	0.510785	0.291762	0.153332	1.11214	0.49631	0.304247	0.32432	1.25207	0.158228	0.800716	0.384595	1.30549	0.0975093	1.01095	0.00517163	1.00359	0.981586	0.00807171	0.17616	1.12987	0.435309	0.361202	0.236434
M0R2B7	DNA polymerase (EC 2.7.7.7)	POLD1	POLD1	126,388	-0.393974	0.761031	7.23981e-05	4.14027	-0.040109	0.972581	0.618383	0.208742	-0.321058	0.800483	0.000619249	3.20813	-0.19101	0.875992	0.0256627	1.5907	-0.365208	0.776357	0.000168095	3.77445	0.353865	1.27798	0.00159879	2.79621	0.0729154	1.05184	0.461338	0.335981	0.202963	1.15106	0.0494691	1.30567	0.0287656	1.02014	0.770053	0.113479	-0.280949	0.823049	0.00894071	2.04863	-0.150901	0.900688	0.135711	0.867386	-0.325099
M0R300	Unconventional myosin-IXb (Fragment)	MYO9B	MYO9B	234,074	-0.0409295	0.972028	0.834309	0.0786733	-0.0289668	0.980122	0.882278	0.0543946	-0.345051	0.78728	0.0890965	1.05014	-0.00946294	0.993462	0.961407	0.0170926	-0.170618	0.888462	0.387469	0.411763	0.0119627	1.00833	0.960166	0.0176536	-0.304121	0.809935	0.213169	0.671276	0.0314666	1.02205	0.895498	0.0479353	-0.129689	0.914029	0.589556	0.229475	-0.316084	0.803247	0.196396	0.706866	0.0195039	1.01361	0.935103	0.0291404	-0.141652
M0R3F1	Heterogeneous nuclear ribonucleoprotein U-like protein 1 (Fragment)	HNRNPUL1	HNRNPUL1	71,723	-0.0115256	0.992043	0.79635	0.0988958	0.0712612	1.05063	0.12146	0.915568	0.0602644	1.04266	0.186574	0.72915	-0.191061	0.875961	0.000317287	3.49855	-0.052004	0.964596	0.251766	0.599002	0.0827868	1.05906	0.140662	0.851824	0.07179	1.05102	0.198389	0.702482	-0.179535	0.882987	0.00334657	2.4754	-0.0404784	0.972332	0.461978	0.335379	-0.0109967	0.992407	0.840609	0.0754058	-0.262322	0.833745	9.33518e-05	4.02988	-0.123265
O00148	ATP-dependent RNA helicase DDX39A (EC 3.6.4.13) (DEAD box protein 39) (Nuclear RNA helicase URH49)	DDX39A DDX39	DDX39A	49,130	-0.279411	0.823928	0.00343671	2.46386	-0.212247	0.863192	0.020379	1.69082	-0.402871	0.756352	0.00011257	3.94858	0.0172871	1.01205	0.839574	0.0759411	-0.166543	0.890975	0.062063	1.20717	0.0671635	1.04765	0.522697	0.28175	-0.12346	0.917983	0.24566	0.609665	0.296698	1.22833	0.0093468	2.02934	0.112868	1.08138	0.287203	0.54181	-0.190624	0.876227	0.0795966	1.09911	0.229534	1.17246	0.037809	1.4224	0.045704
O00151	PDZ and LIM domain protein 1 (C-terminal LIM domain protein 1) (Elfin) (LIM domain protein CLP-36)	PDLIM1 CLIM1 CLP36	PDLIM1	36,072	0.333961	1.26047	1.80379e-06	5.74381	-0.00480102	0.996678	0.925006	0.0338554	0.336386	1.26259	1.62873e-06	5.78815	0.171708	1.12639	0.00276428	2.55842	0.275541	1.21045	2.3039e-05	4.63754	-0.338762	0.79072	2.19707e-05	4.65816	0.0024248	1.00168	0.969033	0.0136613	-0.162252	0.893629	0.0159916	1.79611	-0.05842	0.960315	0.354872	0.449929	0.341187	1.2668	2.01039e-05	4.69672	0.176509	1.13015	0.00961239	2.01717	0.280342
O00154	Cytosolic acyl coenzyme A thioester hydrolase (EC 3.1.2.2) (Acyl-CoA thioesterase 7) (Brain acyl-CoA hydrolase) (BACH) (hBACH) (CTE-IIa) (CTE-II) (Long chain acyl-CoA thioester hydrolase)	ACOT7 BACH	ACOT7	41,796	-0.115506	0.923059	0.119088	0.924133	-0.096379	0.935378	0.189375	0.722677	0.0314023	1.02201	0.662783	0.178629	-0.165617	0.891547	0.0300561	1.52207	-0.165584	0.891568	0.0300857	1.52164	0.0191269	1.01335	0.828003	0.0819681	0.146908	1.10719	0.106344	0.973288	-0.050111	0.965862	0.570557	0.243701	-0.0500776	0.965884	0.570812	0.243507	0.127781	1.09261	0.156892	0.8044	-0.069238	0.953141	0.434878	0.361632	-0.0692045
O00170	AH receptor-interacting protein (AIP) (Aryl-hydrocarbon receptor-interacting protein) (HBV X-associated protein 2) (XAP-2) (Immunophilin homolog ARA9)	AIP XAP2	AIP	37,636	0.141063	1.10272	0.00272974	2.56388	0.0491444	1.03465	0.248072	0.605422	0.0935049	1.06696	0.0348233	1.45813	0.185255	1.13702	0.000223948	3.64985	0.230064	1.17289	1.84531e-05	4.73393	-0.0919184	0.938274	0.0842015	1.07468	-0.0475579	0.967573	0.358413	0.445616	0.0441917	1.03111	0.392762	0.405871	0.0890011	1.06363	0.0937813	1.02788	0.0443605	1.03123	0.390989	0.407835	0.13611	1.09894	0.014034	1.85282	0.18092
O00203	AP-3 complex subunit beta-1 (Adaptor protein complex AP-3 subunit beta-1) (Adaptor-related protein complex 3 subunit beta-1) (Beta-3A-adaptin) (Clathrin assembly protein complex 3 beta-1 large chain)	AP3B1 ADTB3A	AP3B1	121,320	-0.128657	0.914683	0.0110365	1.95717	-0.0648759	0.956028	0.173386	0.760987	-0.204806	0.867655	0.000239268	3.62111	0.022675	1.01584	0.627126	0.202645	-0.157583	0.896525	0.00264284	2.57793	0.0637808	1.0452	0.270536	0.567775	-0.0761491	0.948586	0.191155	0.718614	0.151332	1.11059	0.014088	1.85115	-0.0289267	0.980149	0.612954	0.212572	-0.13993	0.907563	0.021831	1.66093	0.087551	1.06256	0.135475	0.868142	-0.0927075
O00231	26S proteasome non-ATPase regulatory subunit 11 (26S proteasome regulatory subunit RPN6) (26S proteasome regulatory subunit S9) (26S proteasome regulatory subunit p44.5)	PSMD11	PSMD11	47,464	-0.0323707	0.977812	0.472566	0.325537	-0.060986	0.958609	0.182966	0.737629	-0.153123	0.899302	0.00243992	2.61262	0.130384	1.09458	0.00790519	2.10209	-0.0698661	0.952726	0.129689	0.887098	-0.0286152	0.980361	0.60301	0.219675	-0.120752	0.919708	0.0373126	1.42814	0.162754	1.11942	0.00695875	2.15747	-0.0374954	0.974345	0.496623	0.303973	-0.0921372	0.938132	0.104281	0.981796	0.19137	1.14185	0.00207037	2.68395	-0.00888015
O00232	26S proteasome non-ATPase regulatory subunit 12 (26S proteasome regulatory subunit RPN5) (26S proteasome regulatory subunit p55)	PSMD12	PSMD12	52,904	-0.131897	0.912631	0.106596	0.97226	-0.0949746	0.936289	0.237904	0.623599	-0.418525	0.748189	2.95747e-05	4.52908	0.181184	1.13381	0.0309261	1.50967	-0.0282562	0.980605	0.721201	0.141944	0.0369223	1.02592	0.703464	0.152758	-0.286628	0.819816	0.00708377	2.14974	0.31308	1.24236	0.00377296	2.42332	0.103641	1.07448	0.291259	0.53572	-0.32355	0.799101	0.00293192	2.53285	0.276158	1.21097	0.00905726	2.043	0.0667184
O00264	Membrane-associated progesterone receptor component 1 (mPR) (Dap1) (IZA)	PGRMC1 HPR6.6 PGRMC	PGRMC1	21,671	0.283538	1.21718	0.0693679	1.15884	0.179139	1.13221	0.239551	0.620603	0.504755	1.41888	0.00272604	2.56447	0.15509	1.11349	0.306483	0.513594	0.427183	1.34461	0.00901141	2.04521	-0.104399	0.930193	0.570528	0.243723	0.221217	1.16572	0.235814	0.627431	-0.128448	0.914815	0.486114	0.313262	0.143645	1.10469	0.436732	0.359785	0.325616	1.2532	0.0870736	1.06011	-0.0240493	0.983468	0.89563	0.0478715	0.248044
O00267	Transcription elongation factor SPT5 (hSPT5) (DRB sensitivity-inducing factor 160 kDa subunit) (DSIF p160) (DRB sensitivity-inducing factor large subunit) (DSIF large subunit) (Tat-cotransactivator 1 protein) (Tat-CT1 protein)	SUPT5H SPT5 SPT5H	SUPT5H	121,000	-0.169393	0.889217	0.0109832	1.95927	0.0364915	1.02562	0.552944	0.257319	-0.0661542	0.955181	0.28688	0.5423	-0.167844	0.890172	0.0116236	1.93466	-0.137004	0.909406	0.0346551	1.46023	0.205885	1.15339	0.0115138	1.93878	0.103239	1.07418	0.178526	0.748298	0.00154879	1.00107	0.983522	0.00721614	0.0323896	1.0227	0.666523	0.176185	-0.102646	0.931324	0.180924	0.742504	-0.204336	0.867938	0.012058	1.91872	-0.173495
O00273	DNA fragmentation factor subunit alpha (DNA fragmentation factor 45 kDa subunit) (DFF-45) (Inhibitor of CAD) (ICAD)	DFFA DFF1 DFF45 H13	DFFA	36,522	0.0493535	1.0348	0.708931	0.149396	0.0165515	1.01154	0.900218	0.0456523	0.180573	1.13333	0.181125	0.742022	0.166099	1.12202	0.217091	0.663359	0.0649775	1.04607	0.623545	0.205132	-0.0328021	0.97752	0.83927	0.0760984	0.131219	1.09522	0.42074	0.375987	0.116745	1.08429	0.473038	0.325104	0.015624	1.01089	0.923006	0.0347956	0.164021	1.12041	0.316416	0.499741	0.149547	1.10922	0.359994	0.443705	0.048426
O00299	Chloride intracellular channel protein 1 (Chloride channel ABP) (Nuclear chloride ion channel 27) (NCC27) (Regulatory nuclear chloride ion channel protein) (hRNCC)	CLIC1 G6 NCC27	CLIC1	26,923	-0.36219	0.777983	2.30616e-08	7.63711	-0.198548	0.871427	9.69485e-05	4.01346	-0.228013	0.85381	1.8717e-05	4.72776	-0.331486	0.794718	9.4284e-08	7.02556	-0.406193	0.754612	3.46666e-09	8.46009	0.163642	1.12011	0.00390086	2.40884	0.134177	1.09747	0.0145777	1.83631	0.0307045	1.02151	0.547658	0.261491	-0.0440023	0.96996	0.391121	0.407688	-0.0294648	0.979784	0.5638	0.248875	-0.132938	0.911973	0.0153847	1.81291	-0.207644
O00303	Eukaryotic translation initiation factor 3 subunit F (eIF3f) (Deubiquitinating enzyme eIF3f) (EC 3.4.19.12) (Eukaryotic translation initiation factor 3 subunit 5) (eIF-3-epsilon) (eIF3 p47)	EIF3F EIF3S5	EIF3F	37,564	-0.0939827	0.936933	0.146146	0.835214	-0.134689	0.910866	0.0424468	1.37215	-0.253433	0.838898	0.000581924	3.23513	0.0194899	1.0136	0.757128	0.120831	-0.0413039	0.971776	0.513986	0.289049	-0.0407065	0.972179	0.59877	0.22274	-0.15945	0.895366	0.0491076	1.30885	0.113473	1.08183	0.151653	0.819149	0.0526788	1.03719	0.496931	0.303704	-0.118743	0.92099	0.134461	0.871404	0.154179	1.11279	0.0563471	1.24913	0.0933853
O00410	Importin-5 (Imp5) (Importin subunit beta-3) (Karyopherin beta-3) (Ran-binding protein 5) (RanBP5)	IPO5 KPNB3 RANBP5	IPO5	123,630	-0.245575	0.84348	1.0442e-05	4.98122	-0.294305	0.815465	8.67901e-07	6.06153	-0.359319	0.779533	4.13713e-08	7.3833	-0.105148	0.929709	0.0214815	1.66794	-0.296289	0.814345	7.87217e-07	6.10391	-0.0487299	0.966787	0.356646	0.447763	-0.113744	0.924187	0.0394784	1.40364	0.140427	1.10223	0.0131764	1.8802	-0.0507135	0.965459	0.337835	0.471296	-0.0650139	0.955936	0.222543	0.652586	0.189157	1.1401	0.00153502	2.81389	-0.00198363
O00422	Histone deacetylase complex subunit SAP18 (18 kDa Sin3-associated polypeptide) (2HOR0202) (Cell growth-inhibiting gene 38 protein) (Sin3-associated polypeptide p18)	SAP18 GIG38	SAP18	17,561	0.120057	1.08678	0.0520073	1.28394	-0.0120698	0.991669	0.837597	0.0769651	0.052041	1.03673	0.381222	0.418823	0.0727496	1.05172	0.225091	0.647641	0.0668638	1.04744	0.263514	0.579197	-0.132126	0.912485	0.0781702	1.10696	-0.0680158	0.953949	0.350721	0.455038	-0.0473072	0.967741	0.513914	0.28911	-0.053193	0.963801	0.4636	0.333857	0.0641107	1.04544	0.378489	0.421947	0.0848193	1.06055	0.247353	0.606682	0.0789335
O00425	Insulin-like growth factor 2 mRNA-binding protein 3 (IGF2 mRNA-binding protein 3) (IMP-3) (IGF-II mRNA-binding protein 3) (KH domain-containing protein overexpressed in cancer) (hKOC) (VICKZ family member 3)	IGF2BP3 IMP3 KOC1 VICKZ3	IGF2BP3	63,705	0.0645192	1.04574	0.359929	0.443783	0.0743982	1.05292	0.292772	0.533471	-0.0595741	0.959547	0.397195	0.400997	0.0164766	1.01149	0.813328	0.0897345	-0.129474	0.914165	0.0746524	1.12696	0.00987908	1.00687	0.907919	0.041953	-0.124093	0.917581	0.156678	0.804991	-0.0480426	0.967248	0.575248	0.240145	-0.193993	0.874183	0.0322736	1.49115	-0.133972	0.911319	0.12778	0.893538	-0.0579217	0.960647	0.500086	0.300955	-0.203872
O00442	RNA 3'-terminal phosphate cyclase (RNA cyclase) (RNA-3'-phosphate cyclase) (EC 6.5.1.4) (RNA terminal phosphate cyclase domain-containing protein 1) (RTC domain-containing protein 1)	RTCA RPC RPC1 RTC1 RTCD1	RTCA	39,337	-0.0354019	0.97576	0.721779	0.141596	0.17304	1.12743	0.0927235	1.03281	0.123228	1.08917	0.223159	0.651385	0.0816055	1.05819	0.41495	0.382004	0.0439615	1.03094	0.658639	0.181353	0.208442	1.15544	0.0978468	1.00945	0.158629	1.11623	0.201275	0.69621	0.117007	1.08448	0.341376	0.466767	0.0793634	1.05655	0.51612	0.287249	-0.0498121	0.966062	0.682632	0.165813	-0.0914342	0.938589	0.455182	0.341815	-0.129078
O00469	Procollagen-lysine,2-oxoglutarate 5-dioxygenase 2 (EC 1.14.11.4) (Lysyl hydroxylase 2) (LH2)	PLOD2	PLOD2	84,686	-0.131434	0.912924	0.613444	0.212225	-0.0937603	0.937077	0.718146	0.143788	-0.158948	0.895678	0.541858	0.266115	-0.435666	0.739352	0.104363	0.981452	-0.669304	0.62881	0.0165964	1.77999	0.0376733	1.02646	0.905601	0.0430629	-0.0275142	0.981109	0.930976	0.0310615	-0.304232	0.809873	0.343655	0.463877	-0.537871	0.688787	0.101782	0.992328	-0.0651875	0.955821	0.837474	0.0770285	-0.341906	0.788998	0.288637	0.539648	-0.575544
O00487	26S proteasome non-ATPase regulatory subunit 14 (EC 3.4.19.-) (26S proteasome regulatory subunit RPN11) (26S proteasome-associated PAD1 homolog 1)	PSMD14 POH1	PSMD14	34,577	-0.074925	0.949391	0.255638	0.592374	-0.102101	0.931675	0.126411	0.898216	-0.158978	0.895659	0.0219701	1.65817	0.0339205	1.02379	0.602097	0.220334	-0.044849	0.969391	0.4917	0.3083	-0.0271765	0.981339	0.732543	0.135167	-0.0840529	0.943404	0.296513	0.527956	0.108845	1.07836	0.180346	0.743894	0.030076	1.02107	0.705371	0.151582	-0.0568764	0.961343	0.476659	0.321792	0.136022	1.09887	0.0981359	1.00817	0.0572525
O00499	Myc box-dependent-interacting protein 1 (Amphiphysin II) (Amphiphysin-like protein) (Box-dependent myc-interacting protein 1) (Bridging integrator 1)	BIN1 AMPHL	BIN1	64,699	-0.0716271	0.951564	0.401084	0.396765	-0.0671182	0.954543	0.430885	0.365639	0.0902672	1.06457	0.292447	0.533953	-0.243225	0.844854	0.0085636	2.06734	-0.168853	0.88955	0.0566432	1.24685	0.00450893	1.00313	0.965266	0.015353	0.161894	1.11876	0.128983	0.889467	-0.171598	0.887859	0.108807	0.963342	-0.0972261	0.934829	0.353012	0.45221	0.157385	1.11526	0.139373	0.85582	-0.176107	0.885088	0.100386	0.998328	-0.101735
O00505	Importin subunit alpha-4 (Importin alpha Q2) (Qip2) (Karyopherin subunit alpha-3) (SRP1-gamma)	KPNA3 QIP2	KPNA3	57,811	-0.114851	0.923478	0.150574	0.822251	-0.0352328	0.975874	0.651541	0.186058	-0.169564	0.889112	0.0391391	1.40739	0.0730743	1.05196	0.352963	0.452271	-0.029719	0.979611	0.703034	0.153024	0.0796183	1.05674	0.407561	0.389808	-0.0547126	0.962786	0.567504	0.246031	0.187925	1.13912	0.0595774	1.22492	0.0851321	1.06078	0.376448	0.424295	-0.134331	0.911092	0.168863	0.772466	0.108307	1.07796	0.263351	0.579465	0.00551381
O00567	Nucleolar protein 56 (Nucleolar protein 5A)	NOP56 NOL5A	NOP56	66,050	-0.147202	0.903	0.0484011	1.31514	0.106525	1.07663	0.143895	0.841954	-0.0457008	0.968819	0.521527	0.282723	0.0823084	1.05871	0.253714	0.595655	-0.0971922	0.934851	0.180475	0.743584	0.253727	1.19228	0.00775117	2.11063	0.101502	1.07289	0.250562	0.601085	0.229511	1.17244	0.0144972	1.83872	0.0500103	1.03527	0.566427	0.246856	-0.152225	0.899861	0.0911414	1.04028	-0.0242162	0.983355	0.780626	0.107557	-0.203717
O00622	CCN family member 1 (Cellular communication network factor 1) (Cysteine-rich angiogenic inducer 61) (Insulin-like growth factor-binding protein 10) (IBP-10) (IGF-binding protein 10) (IGFBP-10) (Protein CYR61) (Protein GIG1)	CCN1 CYR61 GIG1 IGFBP10	CCN1	42,027	0.134136	1.09744	0.166434	0.778758	0.235304	1.17715	0.020346	1.69152	1.02411	2.03371	6.15711e-10	9.21062	-0.266405	0.831389	0.00982315	2.00775	0.485498	1.40007	4.29742e-05	4.36679	0.101168	1.07264	0.387052	0.412231	0.889978	1.85315	1.72087e-07	6.76425	-0.400542	0.757574	0.00223598	2.65053	0.351362	1.27576	0.00600127	2.22176	0.788811	1.72765	1.03528e-06	5.98494	-0.501709	0.706269	0.000282571	3.54887	0.250194
O00625	Pirin (EC 1.13.11.24) (Probable quercetin 2,3-dioxygenase PIR) (Probable quercetinase)	PIR	PIR	32,113	0.385632	1.30643	6.32037e-09	8.19926	0.230433	1.17319	1.33564e-05	4.87431	0.243188	1.18361	6.6214e-06	5.17905	0.565945	1.48036	7.4516e-12	11.1278	0.465759	1.38104	2.48093e-10	9.60538	-0.155199	0.898008	0.00510935	2.29163	-0.142443	0.905983	0.0091508	2.03854	0.180313	1.13313	0.00157974	2.80141	0.0801271	1.05711	0.120383	0.919434	0.0127557	1.00888	0.798875	0.0975211	0.335512	1.26183	1.28324e-06	5.89169	0.235326
O00629	Importin subunit alpha-3 (Importin alpha Q1) (Qip1) (Karyopherin subunit alpha-4)	KPNA4 QIP1	KPNA4	57,887	-0.114021	0.924009	0.0774991	1.1107	0.00954107	1.00664	0.877838	0.0565858	-0.106205	0.929029	0.0984098	1.00696	0.137087	1.09968	0.0367739	1.43446	0.0326414	1.02288	0.600143	0.221745	0.123562	1.08942	0.115259	0.938326	0.0078167	1.00543	0.918091	0.0371144	0.251109	1.19012	0.00320151	2.49465	0.146663	1.10701	0.0647511	1.18875	-0.115746	0.922905	0.138646	0.858091	0.127546	1.09243	0.104681	0.98013	0.0231004
O00743	Serine/threonine-protein phosphatase 6 catalytic subunit (PP6C) (EC 3.1.3.16) [Cleaved into: Serine/threonine-protein phosphatase 6 catalytic subunit, N-terminally processed]	PPP6C PPP6	PPP6C	35,144	-0.0980329	0.934306	0.283091	0.548074	-0.156263	0.897347	0.0939513	1.0271	-0.0406219	0.972236	0.652564	0.185377	-0.0822186	0.944604	0.365939	0.436591	-0.0635818	0.956886	0.482638	0.316379	-0.0582298	0.960442	0.598592	0.222869	0.0574109	1.0406	0.603709	0.219172	0.0158143	1.01102	0.885947	0.0525925	0.0344511	1.02417	0.754914	0.122103	0.115641	1.08346	0.300707	0.521857	0.074044	1.05266	0.504161	0.297431	0.0926809
O00754	Lysosomal alpha-mannosidase (Laman) (EC 3.2.1.24) (Lysosomal acid alpha-mannosidase) (Mannosidase alpha class 2B member 1) (Mannosidase alpha-B) [Cleaved into: Lysosomal alpha-mannosidase A peptide; Lysosomal alpha-mannosidase B peptide; Lysosomal alpha-mannosidase C peptide; Lysosomal alpha-mannosidase D peptide; Lysosomal alpha-mannosidase E peptide]	MAN2B1 LAMAN MANB	MAN2B1	113,744	0.173157	1.12752	0.116349	0.934239	0.0906172	1.06483	0.400598	0.397291	0.154641	1.11314	0.158244	0.800672	0.17245	1.12697	0.117758	0.929011	0.104898	1.07542	0.33199	0.478875	-0.0825398	0.944394	0.530248	0.275521	-0.0185157	0.987248	0.887505	0.0518294	-0.000707192	0.99951	0.995688	0.00187676	-0.0682586	0.953789	0.603168	0.219562	0.0640241	1.04538	0.625691	0.20364	0.0818326	1.05836	0.533743	0.272668	0.0142811
O00764	Pyridoxal kinase (EC 2.7.1.35) (Pyridoxine kinase)	PDXK C21orf124 C21orf97 PKH PNK PRED79	PDXK	35,102	-0.118537	0.921121	0.377669	0.422889	-0.0067665	0.995321	0.959438	0.0179829	-0.0199219	0.986286	0.881002	0.0550233	-0.123838	0.917743	0.357138	0.447164	-0.0106759	0.992627	0.936048	0.028702	0.111771	1.08055	0.495294	0.305137	0.0986153	1.07075	0.546886	0.262104	-0.00530088	0.996332	0.974048	0.0114197	0.107861	1.07763	0.510328	0.29215	-0.0131554	0.990923	0.935657	0.0288836	-0.117072	0.922057	0.475321	0.323013	-0.00390942
O14519	Cyclin-dependent kinase 2-associated protein 1 (CDK2-associated protein 1) (Deleted in oral cancer 1) (DOC-1) (Putative oral cancer suppressor)	CDK2AP1 CDKAP1 DOC1	CDK2AP1	12,365	-0.189696	0.87679	0.0796175	1.09899	-0.191394	0.875759	0.0771581	1.11262	-0.161795	0.893912	0.130918	0.883001	-0.0974607	0.934677	0.354102	0.450872	-0.0984058	0.934065	0.349555	0.456484	-0.00169724	0.998824	0.989372	0.0046405	0.0279016	1.01953	0.826763	0.0826191	0.0922356	1.06602	0.472031	0.326029	0.0912905	1.06532	0.476525	0.321915	0.0295988	1.02073	0.816421	0.0880858	0.0939329	1.06728	0.464025	0.333458	0.0929878
O14530	Thioredoxin domain-containing protein 9 (ATP-binding protein associated with cell differentiation) (Protein 1-4)	TXNDC9 APACD	TXNDC9	26,534	-0.28941	0.818237	0.00385004	2.41454	-0.181831	0.881583	0.0534627	1.27195	-0.250301	0.840721	0.0104434	1.98116	-0.173462	0.886712	0.0643561	1.19141	-0.295077	0.815029	0.00332353	2.4784	0.107579	1.07742	0.333445	0.476975	0.0391089	1.02748	0.722398	0.141223	0.115947	1.08369	0.298117	0.525613	-0.00566742	0.996079	0.958878	0.0182369	-0.0684697	0.953649	0.535307	0.271397	0.00836881	1.00582	0.93931	0.0271908	-0.113246
O14561	Acyl carrier protein, mitochondrial (ACP) (CI-SDAP) (NADH-ubiquinone oxidoreductase 9.6 kDa subunit)	NDUFAB1	NDUFAB1	17,417	0.153098	1.11196	0.0502126	1.29919	0.027484	1.01923	0.712361	0.1473	0.177223	1.13071	0.0255695	1.59228	0.179263	1.13231	0.0241115	1.61778	0.276702	1.21142	0.00120815	2.91788	-0.125614	0.916614	0.17809	0.749362	0.0241249	1.01686	0.791425	0.10159	0.0261642	1.0183	0.774287	0.111098	0.123603	1.08945	0.184826	0.733236	0.149739	1.10937	0.111718	0.951878	0.151779	1.11094	0.107218	0.969733	0.249218
O14579	Coatomer subunit epsilon (Epsilon-coat protein) (Epsilon-COP)	COPE	COPE	34,482	0.0310938	1.02179	0.743329	0.128819	-0.0457958	0.968755	0.630153	0.200554	-0.0472155	0.967802	0.61965	0.207854	-0.00685536	0.995259	0.942373	0.025777	-0.0184508	0.987292	0.845804	0.0727305	-0.0768896	0.9481	0.510282	0.29219	-0.0783093	0.947167	0.50259	0.298786	-0.0379492	0.974039	0.744191	0.128316	-0.0495446	0.966241	0.670393	0.173671	-0.0014197	0.999016	0.990247	0.00425647	0.0389404	1.02736	0.73777	0.132079	0.027345
O14617	AP-3 complex subunit delta-1 (AP-3 complex subunit delta) (Adaptor-related protein complex 3 subunit delta-1) (Delta-adaptin)	AP3D1 PRO0039	AP3D1	130,158	-0.0907272	0.939049	0.0878214	1.0564	-0.0806299	0.945645	0.126407	0.898228	-0.192758	0.874932	0.00108188	2.96582	-0.00920494	0.99364	0.857378	0.0668279	-0.114465	0.923725	0.0347997	1.45842	0.0100973	1.00702	0.872114	0.0594269	-0.10203	0.931721	0.11499	0.939341	0.0815223	1.05813	0.202863	0.692798	-0.0237376	0.983681	0.705527	0.151486	-0.112128	0.925223	0.0851757	1.06968	0.0714249	1.05075	0.262309	0.581186	-0.033835
O14646	Chromodomain-helicase-DNA-binding protein 1 (CHD-1) (EC 3.6.4.12) (ATP-dependent helicase CHD1)	CHD1	CHD1	196,688	-0.0676296	0.954205	0.415577	0.381348	-0.0857925	0.942267	0.304143	0.516923	-0.103409	0.930831	0.218208	0.66113	-0.0319392	0.978105	0.698757	0.155674	-0.107285	0.928333	0.202082	0.694472	-0.0181629	0.987489	0.857185	0.0669255	-0.0357792	0.975505	0.723277	0.140695	0.0356904	1.02505	0.723933	0.140302	-0.0396556	0.972887	0.694834	0.158119	-0.0176162	0.987864	0.861436	0.0647769	0.0538533	1.03803	0.594805	0.225625	-0.0214927
O14656	Torsin-1A (Dystonia 1 protein) (Torsin ATPase-1A) (EC 3.6.4.-) (Torsin family 1 member A)	TOR1A DQ2 DYT1 TA TORA	TOR1A	37,809	-0.242286	0.845405	0.246066	0.608948	-0.10701	0.928511	0.603483	0.219335	-0.423757	0.745481	0.04955	1.30496	-0.111952	0.925335	0.586985	0.231373	-0.504571	0.70487	0.0217157	1.66323	0.135276	1.0983	0.591965	0.227704	-0.181471	0.881804	0.473404	0.324768	0.130334	1.09455	0.605475	0.217904	-0.262285	0.833766	0.303457	0.517903	-0.316747	0.802878	0.216716	0.664109	-0.00494196	0.99658	0.984321	0.00686342	-0.397561
O14737	Programmed cell death protein 5 (TF-1 cell apoptosis-related protein 19) (Protein TFAR19)	PDCD5 TFAR19	PDCD5	14,285	-0.0603576	0.959026	0.222813	0.652059	-0.0156551	0.989207	0.747585	0.126339	0.0537513	1.03796	0.275796	0.559412	-0.143501	0.905319	0.00719023	2.14326	-0.0803494	0.945829	0.109484	0.960651	0.0447025	1.03147	0.455656	0.341363	0.114109	1.08231	0.0662925	1.17854	-0.0831439	0.943998	0.172397	0.76347	-0.0199917	0.986238	0.737232	0.132396	0.0694064	1.04928	0.251338	0.599741	-0.127846	0.915197	0.0416741	1.38013	-0.0646943
O14744	Protein arginine N-methyltransferase 5 (PRMT5) (EC 2.1.1.320) (72 kDa ICln-binding protein) (Histone-arginine N-methyltransferase PRMT5) (Jak-binding protein 1) (Shk1 kinase-binding protein 1 homolog) (SKB1 homolog) (SKB1Hs) [Cleaved into: Protein arginine N-methyltransferase 5, N-terminally processed]	PRMT5 HRMT1L5 IBP72 JBP1 SKB1	PRMT5	72,684	-0.145091	0.904322	0.0479096	1.31958	-0.0192348	0.986756	0.782897	0.106295	-0.191952	0.875421	0.0113402	1.94538	0.120881	1.0874	0.0944737	1.02469	0.00545473	1.00379	0.937661	0.0279542	0.125856	1.09115	0.151231	0.820358	-0.0468608	0.96804	0.584679	0.233082	0.265972	1.20245	0.00497875	2.30288	0.150546	1.10999	0.0894117	1.04861	-0.172717	0.88717	0.053896	1.26844	0.140116	1.10199	0.112223	0.949919	0.0246895
O14745	Na(+)/H(+) exchange regulatory cofactor NHE-RF1 (NHERF-1) (Ezrin-radixin-moesin-binding phosphoprotein 50) (EBP50) (Regulatory cofactor of Na(+)/H(+) exchanger) (Sodium-hydrogen exchanger regulatory factor 1) (Solute carrier family 9 isoform A3 regulatory factor 1)	SLC9A3R1 NHERF NHERF1	SLC9A3R1	38,868	0.401629	1.321	0.00239257	2.62113	-0.0346296	0.976282	0.767772	0.114768	0.0566208	1.04003	0.629861	0.200755	0.396309	1.31614	0.00266143	2.57489	0.073334	1.05215	0.533324	0.273009	-0.436259	0.739049	0.00589326	2.22964	-0.345008	0.787303	0.0243278	1.6139	-0.00531956	0.99632	0.970424	0.0130386	-0.328295	0.796477	0.0311667	1.50631	0.0912504	1.06529	0.526868	0.278298	0.430939	1.34811	0.00641647	2.1927	0.107964
O14776	Transcription elongation regulator 1 (TATA box-binding protein-associated factor 2S) (Transcription factor CA150)	TCERG1 CA150 TAF2S	TCERG1	123,901	0.0393424	1.02765	0.454806	0.342174	0.0811257	1.05784	0.131633	0.880636	0.0981273	1.07038	0.0717244	1.14433	0.0204267	1.01426	0.69648	0.157092	0.118247	1.08542	0.0329018	1.48278	0.0417833	1.02939	0.516166	0.28721	0.0587848	1.04159	0.363479	0.439521	-0.0189158	0.986974	0.767855	0.114721	0.0789049	1.05622	0.226328	0.645262	0.0170016	1.01185	0.790727	0.101973	-0.060699	0.958799	0.348395	0.457929	0.0371216
O14802	DNA-directed RNA polymerase III subunit RPC1 (RNA polymerase III subunit C1) (EC 2.7.7.6) (DNA-directed RNA polymerase III largest subunit) (DNA-directed RNA polymerase III subunit A) (RNA polymerase III 155 kDa subunit) (RPC155) (RNA polymerase III subunit C160)	POLR3A	POLR3A	155,641	0.0449114	1.03162	0.840151	0.0756426	-0.645186	0.63941	0.00814577	2.08907	-0.0269256	0.98151	0.903719	0.0439666	-0.171321	0.888029	0.444797	0.351838	-0.157609	0.89651	0.481586	0.317327	-0.690097	0.619812	0.0184749	1.73342	-0.071837	0.951426	0.792299	0.101111	-0.216232	0.860811	0.431225	0.365296	-0.20252	0.869031	0.460582	0.336693	0.61826	1.53502	0.0325019	1.48809	0.473865	1.38883	0.0935556	1.02893	0.487577
O14818	Proteasome subunit alpha type-7 (EC 3.4.25.1) (Proteasome subunit RC6-1) (Proteasome subunit XAPC7)	PSMA7 HSPC	PSMA7	27,887	-0.0766387	0.948264	0.117426	0.930234	-0.035908	0.975418	0.452318	0.344556	-0.0222577	0.984691	0.63985	0.193922	-0.0461641	0.968508	0.336157	0.473458	-0.0939819	0.936933	0.0584882	1.23293	0.0407307	1.02863	0.48595	0.313408	0.054381	1.03841	0.354511	0.45037	0.0304746	1.02135	0.601165	0.221007	-0.0173432	0.988051	0.765564	0.116018	0.0136503	1.00951	0.814371	0.0891775	-0.0102561	0.992916	0.85993	0.0655367	-0.0580739
O14907	Tax1-binding protein 3 (Glutaminase-interacting protein 3) (Tax interaction protein 1) (TIP-1) (Tax-interacting protein 1)	TAX1BP3 TIP1	TAX1BP3	13,735	0.200678	1.14924	0.0851193	1.06997	-0.0347203	0.976221	0.757274	0.120747	0.644493	1.56319	1.06138e-05	4.97413	-0.439521	0.73738	0.000753943	3.12266	-0.173244	0.886846	0.133572	0.874286	-0.235398	0.84945	0.0981455	1.00813	0.443815	1.3602	0.00380865	2.41923	-0.640199	0.641625	0.000130132	3.88562	-0.373922	0.771682	0.0121663	1.91484	0.679213	1.60127	6.6861e-05	4.17483	-0.4048	0.755341	0.007326	2.13513	-0.138524
O14908	PDZ domain-containing protein GIPC1 (GAIP C-terminus-interacting protein) (RGS-GAIP-interacting protein) (RGS19-interacting protein 1) (Synectin) (Tax interaction protein 2) (TIP-2)	GIPC1 C19orf3 GIPC RGS19IP1	GIPC1	36,049	0.566797	1.48123	0.0075829	2.12016	0.499897	1.41411	0.0164567	1.78366	0.43006	1.34729	0.0356903	1.44745	0.288294	1.2212	0.146785	0.833318	0.287763	1.22075	0.147492	0.831231	-0.0668995	0.954688	0.777838	0.109111	-0.136737	0.909574	0.565406	0.247639	-0.278503	0.824446	0.247736	0.60601	-0.279033	0.824143	0.246866	0.607539	-0.0698373	0.952745	0.768375	0.114427	-0.211603	0.863577	0.37645	0.424293	-0.212134
O14929	Histone acetyltransferase type B catalytic subunit (EC 2.3.1.48) (Histone acetyltransferase 1)	HAT1 KAT1	HAT1	49,513	-0.225514	0.85529	0.000833667	3.07901	-0.135517	0.910344	0.0286269	1.54323	-0.395962	0.759982	1.04708e-06	5.98002	0.0346541	1.02431	0.553332	0.257014	-0.227139	0.854327	0.000780232	3.10778	0.0899976	1.06437	0.215672	0.666206	-0.170448	0.888567	0.0250429	1.60132	0.260169	1.19762	0.00142014	2.84767	-0.00162473	0.998874	0.981815	0.00797022	-0.260445	0.83483	0.00140717	2.85165	0.170171	1.12519	0.0252518	1.59771	-0.0916224
O14933	Ubiquitin/ISG15-conjugating enzyme E2 L6 (EC 2.3.2.23) (E2 ubiquitin-conjugating enzyme L6) (Retinoic acid-induced gene B protein) (RIG-B) (UbcH8) (Ubiquitin carrier protein L6) (Ubiquitin-protein ligase L6)	UBE2L6 UBCH8	UBE2L6	17,769	-0.0196725	0.986457	0.846634	0.0723042	-0.1946	0.873815	0.0667703	1.17542	-0.0832519	0.943928	0.416756	0.380118	-0.194532	0.873856	0.0668578	1.17485	-0.0823146	0.944541	0.421935	0.374754	-0.174927	0.885812	0.170206	0.769024	-0.0635794	0.956887	0.610784	0.214112	-0.17486	0.885854	0.170365	0.76862	-0.0626422	0.957509	0.616019	0.210406	0.111348	1.08024	0.375938	0.424884	6.79232e-05	1.00005	0.999565	0.000189072	0.112285
O14964	Hepatocyte growth factor-regulated tyrosine kinase substrate (Hrs) (Protein pp110)	HGS HRS	HGS	86,192	0.0187484	1.01308	0.870941	0.0600112	0.0457908	1.03225	0.692002	0.159893	0.118233	1.0854	0.311724	0.50623	0.0524826	1.03705	0.65001	0.18708	0.0862389	1.0616	0.457888	0.339241	0.0270424	1.01892	0.848285	0.0714584	0.0994846	1.07139	0.484083	0.31508	0.0337342	1.02366	0.811426	0.090751	0.0674905	1.04789	0.63386	0.198006	0.0724422	1.0515	0.609334	0.215144	0.00669183	1.00465	0.962225	0.0167232	0.0404481
O14974	Protein phosphatase 1 regulatory subunit 12A (Myosin phosphatase-targeting subunit 1) (Myosin phosphatase target subunit 1) (Protein phosphatase myosin-binding subunit)	PPP1R12A MBS MYPT1	PPP1R12A	115,281	-0.0245306	0.98314	0.829938	0.0809544	-0.111361	0.925714	0.334981	0.47498	0.0906775	1.06487	0.430606	0.365919	-0.365262	0.776328	0.0040798	2.38936	-0.42834	0.743117	0.00111382	2.95319	-0.0868303	0.941589	0.536508	0.270424	0.115208	1.08313	0.413853	0.383153	-0.340731	0.789641	0.0226821	1.64432	-0.403809	0.75586	0.00834364	2.07864	0.202038	1.15032	0.158839	0.799043	-0.253901	0.838626	0.080736	1.09293	-0.316979
O14976	Cyclin-G-associated kinase (EC 2.7.11.1)	GAK	GAK	143,191	-0.218779	0.859292	0.144136	0.841227	-0.214159	0.862048	0.15235	0.817159	-0.117076	0.922054	0.425589	0.37101	-0.563792	0.676522	0.000847216	3.07201	-0.308519	0.80747	0.0445068	1.35157	0.00461972	1.00321	0.979355	0.00906004	0.101703	1.07304	0.570453	0.24378	-0.345013	0.787301	0.0643877	1.1912	-0.0897398	0.939692	0.616304	0.210205	0.097083	1.06961	0.587951	0.230659	-0.349633	0.784784	0.0611809	1.21338	-0.0943595
O14980	Exportin-1 (Exp1) (Chromosome region maintenance 1 protein homolog)	XPO1 CRM1	XPO1	123,386	-0.247255	0.842498	1.84492e-05	4.73402	-0.11847	0.921164	0.0147176	1.83216	-0.420035	0.747406	7.52781e-09	8.12333	0.112652	1.08121	0.0195503	1.70885	-0.165912	0.891365	0.00128975	2.8895	0.128785	1.09337	0.0279887	1.55302	-0.17278	0.887132	0.00470843	2.32712	0.359908	1.28334	1.84928e-06	5.733	0.0813433	1.058	0.150207	0.82331	-0.301565	0.811372	1.94384e-05	4.71134	0.231123	1.17375	0.000387214	3.41205	-0.0474418
O15020	Spectrin beta chain, non-erythrocytic 2 (Beta-III spectrin) (Spinocerebellar ataxia 5 protein)	SPTBN2 KIAA0302 SCA5	SPTBN2	271,325	0.254009	1.19252	0.0112614	1.94841	0.264446	1.20117	0.00872551	2.05921	0.266033	1.2025	0.00839143	2.07616	0.197502	1.14671	0.042206	1.37463	0.310675	1.24029	0.00274278	2.56181	0.0104373	1.00726	0.92635	0.033225	0.0120247	1.00837	0.915191	0.0384883	-0.0565065	0.96159	0.617831	0.209131	0.0566658	1.04006	0.616846	0.209823	0.00158738	1.0011	0.988782	0.00489946	-0.0669438	0.954658	0.554965	0.255734	0.0462285
O15042	U2 snRNP-associated SURP motif-containing protein (140 kDa Ser/Arg-rich domain protein) (U2-associated protein SR140)	U2SURP KIAA0332 SR140	U2SURP	118,292	-0.184499	0.879955	0.00161065	2.793	0.0249892	1.01747	0.627191	0.2026	-0.111108	0.925877	0.0402207	1.39555	-0.0269018	0.981526	0.601247	0.220947	-0.0536041	0.963526	0.302583	0.519155	0.209488	1.15628	0.00298299	2.52535	0.0733903	1.05219	0.2507	0.600846	0.157597	1.11543	0.0194427	1.71124	0.130894	1.09497	0.0476244	1.32217	-0.136098	0.909977	0.0401967	1.39581	-0.051891	0.964671	0.412829	0.384229	-0.0785933
O15067	Phosphoribosylformylglycinamidine synthase (FGAM synthase) (FGAMS) (EC 6.3.5.3) (Formylglycinamide ribonucleotide amidotransferase) (FGAR amidotransferase) (FGAR-AT) (Formylglycinamide ribotide amidotransferase)	PFAS KIAA0361	PFAS	144,734	-0.149477	0.901577	0.0116924	1.9321	-0.0636076	0.956868	0.25176	0.599013	-0.0774117	0.947756	0.166341	0.779	-0.165722	0.891482	0.00595224	2.22532	-0.141819	0.906376	0.015965	1.79683	0.0858691	1.06133	0.208071	0.681788	0.072065	1.05122	0.287918	0.540731	-0.0162453	0.988803	0.808122	0.0925229	0.00765824	1.00532	0.908803	0.0415304	-0.0138041	0.990477	0.836479	0.0775448	-0.102114	0.931667	0.13751	0.861667	-0.0782109
O15116	U6 snRNA-associated Sm-like protein LSm1 (Cancer-associated Sm-like) (Small nuclear ribonuclear CaSm)	LSM1 CASM	LSM1	15,179	-0.24191	0.845625	0.0502075	1.29923	-0.296647	0.814142	0.0188408	1.7249	-0.118344	0.921244	0.320275	0.494476	0.0649689	1.04606	0.582036	0.23505	-0.211858	0.863425	0.0829938	1.08095	-0.0547371	0.96277	0.704391	0.152186	0.123566	1.08942	0.395222	0.403159	0.306879	1.23703	0.0432211	1.3643	0.0300521	1.02105	0.834787	0.0784242	0.178303	1.13155	0.224355	0.649064	0.361616	1.28486	0.019332	1.71372	0.0847891
O15144	Actin-related protein 2/3 complex subunit 2 (Arp2/3 complex 34 kDa subunit) (p34-ARC)	ARPC2 ARC34 PRO2446	ARPC2	34,333	0.0394071	1.02769	0.426321	0.370263	-0.0406652	0.972207	0.411944	0.385162	0.0963961	1.0691	0.0608057	1.21606	-0.141399	0.906639	0.00855527	2.06777	-0.0904353	0.939239	0.0770738	1.11309	-0.0800724	0.94601	0.19293	0.7146	0.056989	1.04029	0.349069	0.457088	-0.180807	0.88221	0.00640862	2.19324	-0.129842	0.913931	0.0409349	1.38791	0.137061	1.09966	0.031889	1.49636	-0.100734	0.932558	0.105557	0.976511	-0.0497701
O15145	Actin-related protein 2/3 complex subunit 3 (Arp2/3 complex 21 kDa subunit) (p21-ARC)	ARPC3 ARC21	ARPC3	20,547	0.00619685	1.0043	0.924277	0.0341979	-0.110414	0.926322	0.101723	0.992579	0.159862	1.11718	0.0219613	1.65834	-0.229827	0.852737	0.00190467	2.72018	-0.126963	0.915757	0.0625191	1.20399	-0.11661	0.922352	0.154679	0.810569	0.153665	1.11239	0.0654105	1.18435	-0.236023	0.849082	0.00715249	2.14554	-0.13316	0.911832	0.10672	0.971754	0.270276	1.20604	0.00264851	2.577	-0.119413	0.920562	0.145491	0.837165	-0.0165495
O15160	DNA-directed RNA polymerases I and III subunit RPAC1 (DNA-directed RNA polymerase I subunit C) (RNA polymerases I and III subunit AC1) (AC40) (DNA-directed RNA polymerases I and III 40 kDa polypeptide) (RPA40) (RPA39) (RPC40)	POLR1C POLR1E	POLR1C	39,250	-0.0798656	0.946146	0.401145	0.396699	-0.0314016	0.978469	0.739427	0.131104	-0.0559102	0.961987	0.554907	0.25578	-0.0319074	0.978126	0.735398	0.133478	0.00266315	1.00185	0.977464	0.00989903	0.0484639	1.03416	0.675366	0.170461	0.0239554	1.01674	0.835732	0.0779329	0.0479581	1.0338	0.67855	0.168418	0.0825287	1.05887	0.47759	0.320945	-0.0245085	0.983155	0.831999	0.079877	-0.000505806	0.999649	0.996505	0.0015206	0.0340648
O15212	Prefoldin subunit 6 (Protein Ke2)	PFDN6 HKE2 PFD6	PFDN6	14,583	0.0295724	1.02071	0.571784	0.242768	-0.0785032	0.94704	0.142592	0.845905	0.0148367	1.01034	0.775996	0.11014	0.0430909	1.03032	0.412099	0.384998	0.0363154	1.02549	0.488349	0.31127	-0.108076	0.927825	0.101657	0.992863	-0.0147357	0.989838	0.817451	0.0875385	0.0135185	1.00941	0.832277	0.0797319	0.00674305	1.00468	0.915835	0.038183	0.0933399	1.06684	0.153993	0.812499	0.121594	1.08794	0.0678488	1.16846	0.114819
O15294	UDP-N-acetylglucosamine--peptide N-acetylglucosaminyltransferase 110 kDa subunit (EC 2.4.1.255) (O-GlcNAc transferase subunit p110) (O-linked N-acetylglucosamine transferase 110 kDa subunit) (OGT)	OGT	OGT	116,925	-0.139385	0.907906	0.0396014	1.40229	-0.106094	0.9291	0.1094	0.960984	-0.419449	0.74771	1.83463e-06	5.73645	-0.00278068	0.998074	0.965416	0.0152856	-0.192483	0.875098	0.00644949	2.19047	0.0332909	1.02334	0.672374	0.172389	-0.280063	0.823555	0.00173249	2.76133	0.136605	1.09931	0.0934346	1.02949	-0.053098	0.963864	0.50148	0.299747	-0.313354	0.804768	0.000634845	3.19733	0.103314	1.07424	0.197813	0.703746	-0.0863889
O15305	Phosphomannomutase 2 (PMM 2) (EC 5.4.2.8)	PMM2	PMM2	28,082	0.00846298	1.00588	0.950336	0.0221227	0.0898513	1.06426	0.510743	0.291798	0.30235	1.23315	0.0355623	1.44901	-0.31847	0.80192	0.0277005	1.55751	-0.0857321	0.942306	0.530111	0.275633	0.0813883	1.05804	0.625818	0.203552	0.293887	1.22594	0.0888183	1.0515	-0.326933	0.797229	0.0604418	1.21866	-0.0941951	0.936795	0.572906	0.241917	0.212499	1.15869	0.210676	0.676385	-0.408321	0.7535	0.0218898	1.65976	-0.175583
O15344	E3 ubiquitin-protein ligase Midline-1 (EC 2.3.2.27) (Midin) (Putative transcription factor XPRF) (RING finger protein 59) (RING finger protein Midline-1) (RING-type E3 ubiquitin transferase Midline-1) (Tripartite motif-containing protein 18)	MID1 FXY RNF59 TRIM18 XPRF	MID1	75,251	-0.581079	0.668463	0.071344	1.14664	-0.271172	0.828646	0.384814	0.414749	-0.701094	0.615106	0.0324825	1.48835	0.346916	1.27184	0.269073	0.57013	0.0321121	1.02251	0.917254	0.0375103	0.309907	1.23963	0.416827	0.380044	-0.120015	0.920178	0.75149	0.124077	0.927995	1.90263	0.0219851	1.65787	0.613192	1.52964	0.116482	0.933741	-0.429922	0.742302	0.263609	0.57904	0.618088	1.53484	0.113767	0.943985	0.303284
O15355	Protein phosphatase 1G (EC 3.1.3.16) (Protein phosphatase 1C) (Protein phosphatase 2C isoform gamma) (PP2C-gamma) (Protein phosphatase magnesium-dependent 1 gamma)	PPM1G PPM1C	PPM1G	59,272	-0.316389	0.803078	4.96894e-07	6.30374	-0.102353	0.931512	0.029377	1.53199	-0.311458	0.805827	6.26298e-07	6.20322	-0.194845	0.873667	0.000234494	3.62987	-0.310653	0.806277	6.5053e-07	6.18673	0.214036	1.15993	0.000689506	3.16146	0.00493032	1.00342	0.927422	0.0327226	0.121544	1.0879	0.0340725	1.4676	0.00573551	1.00398	0.915613	0.0382879	-0.209105	0.865074	0.000855923	3.06757	-0.092492	0.937901	0.0988751	1.00491	-0.2083
O15371	Eukaryotic translation initiation factor 3 subunit D (eIF3d) (Eukaryotic translation initiation factor 3 subunit 7) (eIF-3-zeta) (eIF3 p66)	EIF3D EIF3S7	EIF3D	63,973	-0.152133	0.899919	0.0968498	1.0139	-0.0604232	0.958983	0.497028	0.303619	-0.107442	0.928232	0.232898	0.632834	-0.0531242	0.963847	0.549893	0.259721	-0.0852667	0.94261	0.340603	0.467752	0.0917102	1.06563	0.401422	0.396399	0.0446912	1.03146	0.680571	0.167127	0.0990092	1.07104	0.365706	0.436868	0.0668667	1.04744	0.538994	0.268416	-0.047019	0.967934	0.664994	0.177182	0.00729895	1.00507	0.946282	0.0239796	-0.0248435
O15460	Prolyl 4-hydroxylase subunit alpha-2 (4-PH alpha-2) (EC 1.14.11.2) (Procollagen-proline,2-oxoglutarate-4-dioxygenase subunit alpha-2)	P4HA2 UNQ290/PRO330	P4HA2	60,902	0.178633	1.13181	0.418448	0.378358	-0.208605	0.865373	0.346156	0.460728	0.0987422	1.07084	0.652831	0.185199	-0.119859	0.920277	0.585496	0.232476	-0.289303	0.818297	0.195865	0.708043	-0.387238	0.764592	0.159143	0.798212	-0.079891	0.946129	0.766011	0.115765	-0.298492	0.813102	0.272979	0.56387	-0.467937	0.722998	0.0924176	1.03425	0.307347	1.23743	0.259432	0.585977	0.0887461	1.06345	0.741026	0.130167	-0.0806981
O15511	Actin-related protein 2/3 complex subunit 5 (Arp2/3 complex 16 kDa subunit) (p16-ARC)	ARPC5 ARC16	ARPC5	16,320	0.175933	1.12969	0.00514631	2.2885	0.0192496	1.01343	0.734874	0.133787	0.355574	1.27949	3.33892e-06	5.47639	-0.185607	0.879279	0.00346616	2.46015	0.158407	1.11605	0.0104033	1.98283	-0.156683	0.897085	0.0334968	1.475	0.179641	1.1326	0.0164741	1.7832	-0.36154	0.778334	3.6686e-05	4.4355	-0.0175261	0.987925	0.801107	0.0963092	0.336325	1.26254	8.53635e-05	4.06873	-0.204856	0.867625	0.00730557	2.13635	0.139157
O43143	Pre-mRNA-splicing factor ATP-dependent RNA helicase DHX15 (EC 3.6.4.13) (ATP-dependent RNA helicase #46) (DEAH box protein 15)	DHX15 DBP1 DDX15	DHX15	90,933	-0.156467	0.89722	0.00125791	2.90035	-0.016622	0.988545	0.694746	0.158174	-0.132711	0.912116	0.0046962	2.32825	0.0906341	1.06484	0.0420858	1.37586	0.00687231	1.00477	0.870905	0.060029	0.139845	1.10179	0.0127214	1.89546	0.0237562	1.0166	0.647232	0.18894	0.247101	1.18682	9.95556e-05	4.00193	0.163339	1.11988	0.00453077	2.34383	-0.116089	0.922686	0.0343327	1.46429	0.107256	1.07718	0.048785	1.31171	0.0234944
O43148	mRNA cap guanine-N7 methyltransferase (EC 2.1.1.56) (RG7MT1) (mRNA (guanine-N(7)-)-methyltransferase) (mRNA cap methyltransferase) (hCMT1) (hMet) (hcm1p)	RNMT KIAA0398	RNMT	54,844	0.21793	1.16306	0.036234	1.44088	0.139196	1.10129	0.167127	0.776952	0.032245	1.0226	0.743304	0.128834	0.265084	1.20171	0.012867	1.89052	0.423703	1.34137	0.000297418	3.52663	-0.0787332	0.946889	0.515518	0.287757	-0.185685	0.879232	0.134083	0.872628	0.0471547	1.03323	0.695947	0.157424	0.205773	1.1533	0.0989351	1.00465	-0.106951	0.928548	0.379189	0.421145	0.125888	1.09118	0.302417	0.519394	0.284506
O43172	U4/U6 small nuclear ribonucleoprotein Prp4 (PRP4 homolog) (hPrp4) (U4/U6 snRNP 60 kDa protein) (WD splicing factor Prp4)	PRPF4 PRP4	PRPF4	58,449	-0.0775251	0.947682	0.399395	0.398598	-0.0153666	0.989405	0.866197	0.0623831	-0.140464	0.907227	0.134357	0.87174	0.104272	1.07495	0.260413	0.584337	-0.0743648	0.94976	0.418558	0.378244	0.0621585	1.04403	0.579226	0.237152	-0.0629392	0.957312	0.574507	0.240704	0.181797	1.1343	0.114773	0.940159	0.00316028	1.00219	0.977421	0.0099185	-0.125098	0.916942	0.269975	0.568677	0.119639	1.08646	0.290808	0.536394	-0.0589982
O43237	Cytoplasmic dynein 1 light intermediate chain 2 (Dynein light intermediate chain 2, cytosolic) (LIC-2) (LIC53/55)	DYNC1LI2 DNCLI2 LIC2	DYNC1LI2	54,099	0.0837014	1.05973	0.387068	0.412213	-0.0450193	0.969277	0.639527	0.194141	-0.112132	0.92522	0.250042	0.601988	0.0453547	1.03194	0.637049	0.195827	-0.135591	0.910297	0.167427	0.776176	-0.128721	0.914642	0.280019	0.552812	-0.195833	0.873069	0.106659	0.972002	-0.0383467	0.97377	0.744272	0.128269	-0.219293	0.858987	0.0730659	1.13629	-0.0671123	0.954547	0.569137	0.244783	0.090374	1.06465	0.444793	0.351842	-0.0905718
O43242	26S proteasome non-ATPase regulatory subunit 3 (26S proteasome regulatory subunit RPN3) (26S proteasome regulatory subunit S3) (Proteasome subunit p58)	PSMD3	PSMD3	60,978	-0.0376801	0.97422	0.450851	0.345967	-0.0838018	0.943568	0.102606	0.988828	-0.0201261	0.986147	0.685617	0.163919	-0.0963266	0.935412	0.063273	1.19878	-0.13521	0.910537	0.0120511	1.91897	-0.0461217	0.968536	0.45111	0.345718	0.017554	1.01224	0.772902	0.111876	-0.0586466	0.960164	0.340068	0.468434	-0.0975299	0.934632	0.119699	0.92191	0.0636757	1.04513	0.301256	0.521065	-0.0125249	0.991356	0.836782	0.0773874	-0.0514082
O43264	Centromere/kinetochore protein zw10 homolog	ZW10	ZW10	88,829	-0.370941	0.773278	0.0135185	1.86907	-0.0743166	0.949792	0.593533	0.226555	-0.288871	0.818543	0.0477508	1.32102	-0.233994	0.850278	0.103083	0.986813	-0.191179	0.87589	0.178166	0.749176	0.296624	1.22827	0.092308	1.03476	0.0820703	1.05854	0.630109	0.200584	0.136947	1.09958	0.424043	0.37259	0.179762	1.1327	0.296784	0.527559	-0.214554	0.861813	0.215637	0.666276	-0.159677	0.895225	0.352658	0.452646	-0.116862
O43290	U4/U6.U5 tri-snRNP-associated protein 1 (SNU66 homolog) (hSnu66) (Squamous cell carcinoma antigen recognized by T-cells 1) (SART-1) (hSART-1) (U4/U6.U5 tri-snRNP-associated 110 kDa protein) (allergen Hom s 1)	SART1	SART1	90,255	-0.075616	0.948937	0.513376	0.289564	0.0567378	1.04011	0.623021	0.205497	0.0344102	1.02414	0.765164	0.116245	0.0931361	1.06669	0.42209	0.374595	-0.0639316	0.956654	0.579958	0.236603	0.132354	1.09608	0.352939	0.4523	0.110026	1.07925	0.438463	0.358067	0.168752	1.12409	0.239402	0.620873	0.0116844	1.00813	0.933928	0.0296864	-0.0223276	0.984643	0.874156	0.0584111	0.0363983	1.02555	0.796362	0.0988892	-0.120669
O43310	CBP80/20-dependent translation initiation factor	CTIF KIAA0427	CTIF	67,587	0.323893	1.2517	0.0350224	1.45565	0.0920294	1.06587	0.527931	0.277422	0.177251	1.13073	0.230299	0.637708	0.244582	1.18475	0.103206	0.986293	0.222994	1.16715	0.135217	0.868969	-0.231863	0.851535	0.201235	0.696297	-0.146641	0.903351	0.41317	0.383871	-0.0793107	0.94651	0.656136	0.183006	-0.100899	0.932452	0.571682	0.242846	0.085222	1.06085	0.632468	0.198961	0.152552	1.11153	0.39492	0.40349	0.130964
O43324	Eukaryotic translation elongation factor 1 epsilon-1 (Aminoacyl tRNA synthetase complex-interacting multifunctional protein 3) (Elongation factor p18) (Multisynthase complex auxiliary component p18)	EEF1E1 AIMP3 P18	EEF1E1	19,811	-0.109245	0.927073	0.138937	0.857183	0.0467189	1.03291	0.517403	0.286171	-0.179691	0.882892	0.0196678	1.70624	0.148191	1.10818	0.0495023	1.30538	0.0340563	1.02389	0.636164	0.196431	0.155964	1.11417	0.0875076	1.05795	-0.0704461	0.952344	0.426703	0.369874	0.257436	1.19535	0.00762563	2.11772	0.143301	1.10443	0.114407	0.941546	-0.22641	0.854759	0.0168024	1.77463	0.101472	1.07287	0.256234	0.591363	-0.0126626
O43390	Heterogeneous nuclear ribonucleoprotein R (hnRNP R)	HNRNPR HNRPR	HNRNPR	70,943	-0.00557995	0.99614	0.858564	0.0662275	0.0199088	1.0139	0.526837	0.278324	0.11426	1.08242	0.00141809	2.8483	-0.038789	0.973472	0.223942	0.649864	-0.00494957	0.996575	0.87439	0.0582947	0.0254887	1.01782	0.508467	0.293737	0.11984	1.08661	0.00484005	2.31515	-0.0332091	0.977244	0.390768	0.408082	0.000630382	1.00044	0.98688	0.00573569	0.0943514	1.06759	0.021537	1.66681	-0.0586978	0.96013	0.136642	0.864416	-0.0248584
O43395	U4/U6 small nuclear ribonucleoprotein Prp3 (Pre-mRNA-splicing factor 3) (hPrp3) (U4/U6 snRNP 90 kDa protein)	PRPF3 HPRP3 PRP3	PRPF3	77,529	0.0790444	1.05632	0.427478	0.369086	-0.00702416	0.995143	0.943337	0.0253333	0.329411	1.2565	0.00298915	2.52445	0.0867948	1.06201	0.38435	0.415273	0.038858	1.0273	0.69472	0.15819	-0.0860686	0.942086	0.479784	0.318954	0.250367	1.18951	0.0490703	1.30918	0.00775041	1.00539	0.948942	0.0227601	-0.0401864	0.972529	0.740207	0.130647	0.336436	1.26263	0.0106642	1.97207	0.093819	1.06719	0.441671	0.354901	0.0458822
O43396	Thioredoxin-like protein 1 (32 kDa thioredoxin-related protein)	TXNL1 TRP32 TXL TXNL	TXNL1	32,251	-0.0932188	0.937429	0.0539668	1.26787	-0.12274	0.918441	0.0138827	1.85752	-0.0137856	0.99049	0.765239	0.116203	-0.297742	0.813524	2.19845e-06	5.65788	-0.241399	0.845925	3.39126e-05	4.46964	-0.0295215	0.979745	0.602427	0.220096	0.0794332	1.0566	0.16976	0.770164	-0.204524	0.867825	0.0015194	2.81833	-0.14818	0.902388	0.0151005	1.82101	0.108955	1.07845	0.0648325	1.18821	-0.175002	0.885766	0.00515841	2.28748	-0.118659
O43399	Tumor protein D54 (hD54) (Tumor protein D52-like 2)	TPD52L2	TPD52L2	22,238	0.108252	1.07792	0.111628	0.952228	0.0962301	1.06898	0.154593	0.810809	0.240273	1.18122	0.00142801	2.84527	0.124324	1.09	0.0703632	1.15265	0.153188	1.11202	0.0288046	1.54054	-0.0120218	0.991702	0.881577	0.0547398	0.132022	1.09583	0.113053	0.946716	0.016072	1.0112	0.842173	0.0745988	0.0449357	1.03164	0.579023	0.237304	0.144043	1.105	0.0856167	1.06744	0.0280939	1.01966	0.72807	0.137827	0.0569575
O43447	Peptidyl-prolyl cis-trans isomerase H (PPIase H) (EC 5.2.1.8) (Rotamase H) (Small nuclear ribonucleoprotein particle-specific cyclophilin H) (CypH) (U-snRNP-associated cyclophilin SnuCyp-20) (USA-CYP)	PPIH CYP20 CYPH	PPIH	19,208	-0.183971	0.880277	0.0514652	1.28849	-0.0994812	0.933369	0.276032	0.559041	0.0106321	1.0074	0.905933	0.0429039	-0.210663	0.86414	0.027826	1.55555	-0.0921438	0.938128	0.311988	0.505862	0.0844896	1.06031	0.446513	0.350166	0.194603	1.14441	0.0887805	1.05168	-0.0266922	0.981668	0.808709	0.0922076	0.091827	1.06572	0.408655	0.388643	0.110113	1.07931	0.323584	0.490013	-0.111182	0.925829	0.319025	0.496175	0.00733737
O43491	Band 4.1-like protein 2 (Generally expressed protein 4.1) (4.1G)	EPB41L2	EPB41L2	112,588	0.198719	1.14768	0.0145365	1.83754	0.0267456	1.01871	0.722685	0.141051	0.293278	1.22542	0.000789791	3.10249	-0.105068	0.929761	0.172713	0.762675	0.164047	1.12043	0.039059	1.40828	-0.171973	0.887628	0.0733336	1.1347	0.0945589	1.06774	0.311184	0.506983	-0.303787	0.810123	0.00325976	2.48682	-0.0346716	0.976254	0.707253	0.150425	0.266532	1.20291	0.00827508	2.08223	-0.131814	0.912683	0.162968	0.787897	0.137302
O43493	Trans-Golgi network integral membrane protein 2 (Trans-Golgi network glycoprotein 46) (TGN38 homolog) (hTGN46) (Trans-Golgi network glycoprotein 48) (hTGN48) (Trans-Golgi network glycoprotein 51) (hTGN51) (Trans-Golgi network protein 2)	TGOLN2 TGN46 TGN51	TGOLN2	45,880	0.0314844	1.02206	0.707378	0.150349	0.0410935	1.02889	0.624605	0.204394	-0.0459962	0.968621	0.584175	0.233457	0.0612727	1.04339	0.467258	0.330443	-0.00533443	0.996309	0.9492	0.0226423	0.00960908	1.00668	0.925347	0.0336953	-0.0774805	0.947711	0.453118	0.343789	0.0297883	1.02086	0.771668	0.11257	-0.0368188	0.974802	0.719982	0.142678	-0.0870896	0.94142	0.399952	0.397992	0.0201792	1.01409	0.844064	0.0736244	-0.0464279
O43583	Density-regulated protein (DRP) (Protein DRP1) (Smooth muscle cell-associated protein 3) (SMAP-3)	DENR DRP1 H14	DENR	22,092	0.100127	1.07187	0.124434	0.90506	0.0289543	1.02027	0.64787	0.188512	0.185114	1.13691	0.00763193	2.11737	-0.0417605	0.971469	0.511269	0.29135	0.0347385	1.02437	0.584153	0.233474	-0.0711722	0.951864	0.363107	0.439965	0.0849877	1.06068	0.279581	0.553492	-0.141887	0.906333	0.0782832	1.10633	-0.065388	0.955688	0.402649	0.395074	0.15616	1.11432	0.0545017	1.26359	-0.0707148	0.952166	0.366136	0.436358	0.00578421
O43592	Exportin-T (Exportin(tRNA)) (tRNA exportin)	XPOT	XPOT	109,964	-0.260172	0.834988	0.00011677	3.93267	-0.0260214	0.982125	0.638906	0.194563	-0.20337	0.86852	0.00133041	2.87601	-0.03923	0.973174	0.480856	0.317985	-0.235816	0.849205	0.000330729	3.48053	0.234151	1.17621	0.00223703	2.65033	0.0568026	1.04016	0.405788	0.391701	0.220942	1.16549	0.00353079	2.45213	0.0243564	1.01703	0.719577	0.142923	-0.177348	0.884327	0.0152753	1.81601	-0.0132086	0.990886	0.845452	0.0729113	-0.209794
O43615	Mitochondrial import inner membrane translocase subunit TIM44	TIMM44 MIMT44 TIM44	TIMM44	51,356	-0.0856962	0.94233	0.492174	0.307881	-0.0249469	0.982857	0.840661	0.0753793	-0.140478	0.907219	0.264896	0.576924	0.080263	1.05721	0.51972	0.284231	0.0743437	1.05288	0.55068	0.259101	0.0607493	1.04301	0.689791	0.161283	-0.0547813	0.96274	0.7188	0.143392	0.165959	1.12191	0.281665	0.550267	0.16004	1.11732	0.298694	0.524773	-0.115531	0.923043	0.450183	0.346611	0.10521	1.07565	0.49114	0.308795	0.0992906
O43633	Charged multivesicular body protein 2a (Chromatin-modifying protein 2a) (CHMP2a) (Putative breast adenocarcinoma marker BC-2) (Vacuolar protein sorting-associated protein 2-1) (Vps2-1) (hVps2-1)	CHMP2A BC2 CHMP2	CHMP2A	25,104	0.130242	1.09448	0.435212	0.361299	0.0135919	1.00947	0.934601	0.0293736	0.307445	1.23751	0.0747384	1.12646	-0.14477	0.904524	0.386605	0.412733	-0.168072	0.890031	0.316398	0.499767	-0.11665	0.922327	0.566868	0.246518	0.177204	1.13069	0.386875	0.41243	-0.275012	0.826444	0.184952	0.73294	-0.298314	0.813202	0.151991	0.818182	0.293854	1.22591	0.1579	0.801619	-0.158362	0.896042	0.438482	0.358048	-0.181664
O43660	Pleiotropic regulator 1	PLRG1	PLRG1	57,194	0.0625612	1.04432	0.496455	0.30412	0.038932	1.02735	0.671029	0.173258	0.107168	1.07711	0.249245	0.603373	0.16563	1.12166	0.0815244	1.08871	0.0605882	1.04289	0.50998	0.292447	-0.0236291	0.983755	0.833008	0.0793507	0.0446073	1.0314	0.691027	0.160505	0.103069	1.07406	0.362529	0.440657	-0.00197297	0.998633	0.985946	0.00614682	0.0682364	1.04843	0.544259	0.264194	0.126698	1.09179	0.265518	0.575906	0.0216562
O43665	Regulator of G-protein signaling 10 (RGS10)	RGS10	RGS10	21,210	-0.0818277	0.94486	0.623747	0.204991	0.106803	1.07684	0.522885	0.281594	0.341618	1.26718	0.0505259	1.29649	-0.480177	0.71689	0.00836435	2.07757	-0.250008	0.840892	0.143533	0.843048	0.18863	1.13968	0.359515	0.444283	0.423445	1.34113	0.0480518	1.31829	-0.398349	0.758726	0.0615133	1.21103	-0.168181	0.889964	0.412946	0.384106	0.234815	1.17676	0.256737	0.590512	-0.586979	0.665735	0.00846885	2.07218	-0.356811
O43678	NADH dehydrogenase [ubiquinone] 1 alpha subcomplex subunit 2 (Complex I-B8) (CI-B8) (NADH-ubiquinone oxidoreductase B8 subunit)	NDUFA2	NDUFA2	10,922	0.181525	1.13408	0.0480097	1.31867	0.177567	1.13097	0.0526169	1.27888	0.172189	1.12677	0.0595111	1.2254	0.175075	1.12902	0.0557174	1.25401	0.283869	1.21746	0.00361644	2.44172	-0.00395875	0.99726	0.970464	0.0130207	-0.00933653	0.993549	0.930418	0.0313219	-0.0064509	0.995539	0.951889	0.0214136	0.102343	1.07352	0.343947	0.463509	-0.00537778	0.996279	0.959885	0.017781	-0.00249215	0.998274	0.981403	0.00815251	0.106302
O43681	ATPase ASNA1 (EC 3.6.-.-) (Arsenical pump-driving ATPase) (Arsenite-stimulated ATPase) (Transmembrane domain recognition complex 40 kDa ATPase subunit) (hARSA-I) (hASNA-I)	ASNA1 ARSA TRC40	ASNA1	38,793	-0.0306092	0.979007	0.429764	0.36677	0.0309289	1.02167	0.425037	0.371573	-0.086463	0.941829	0.0339039	1.46975	0.0248701	1.01739	0.520051	0.283954	-0.0190313	0.986895	0.621792	0.206355	0.0615381	1.04358	0.200744	0.697357	-0.0558538	0.962025	0.243851	0.612876	0.0554793	1.0392	0.24692	0.607444	0.0115779	1.00806	0.805983	0.0936739	-0.117392	0.921853	0.0201399	1.69594	-0.00605879	0.995809	0.897673	0.0468817	-0.0499602
O43684	Mitotic checkpoint protein BUB3	BUB3	BUB3	37,155	-0.00778982	0.994615	0.931817	0.0306695	-0.0419622	0.971333	0.645732	0.189948	0.0129615	1.00902	0.886812	0.0521685	0.0155519	1.01084	0.864407	0.0632816	0.0259004	1.01811	0.776248	0.11	-0.0341723	0.976592	0.759512	0.119465	0.0207514	1.01449	0.852419	0.0693471	0.0233417	1.01631	0.834268	0.0786945	0.0336902	1.02363	0.762795	0.117592	0.0549237	1.0388	0.62336	0.205261	0.0575141	1.04067	0.607179	0.216684	0.0678626
O43707	Alpha-actinin-4 (Non-muscle alpha-actinin 4)	ACTN4	ACTN4	104,854	0.200335	1.14897	0.00254392	2.5945	0.0894374	1.06396	0.13964	0.854989	0.571501	1.48607	3.98568e-09	8.3995	-0.325067	0.798261	1.75999e-05	4.75449	0.0406584	1.02858	0.492463	0.307627	-0.110898	0.926012	0.135051	0.869502	0.371166	1.2934	4.15606e-05	4.38132	-0.525402	0.694766	3.83495e-07	6.41624	-0.159677	0.895226	0.0363918	1.439	0.482064	1.39674	1.34722e-06	5.87056	-0.414504	0.750277	1.05191e-05	4.97802	-0.048779
O43719	HIV Tat-specific factor 1 (Tat-SF1)	HTATSF1	HTATSF1	85,853	0.0678837	1.04818	0.245132	0.6106	-0.035349	0.975796	0.540005	0.267602	-0.0452985	0.969089	0.433675	0.362836	0.063254	1.04482	0.277749	0.556348	0.016938	1.01181	0.768212	0.114519	-0.103233	0.930945	0.152631	0.816356	-0.113182	0.924547	0.11869	0.925586	-0.00462962	0.996796	0.947505	0.0234186	-0.0509457	0.965303	0.471641	0.326389	-0.00994956	0.993127	0.887498	0.0518324	0.098603	1.07074	0.170946	0.767141	0.052287
O43747	AP-1 complex subunit gamma-1 (Adaptor protein complex AP-1 subunit gamma-1) (Adaptor-related protein complex 1 subunit gamma-1) (Clathrin assembly protein complex 1 gamma-1 large chain) (Gamma1-adaptin) (Golgi adaptor HA1/AP1 adaptin subunit gamma-1)	AP1G1 ADTG CLAPG1	AP1G1	91,351	-0.0283908	0.980513	0.548309	0.260975	0.0232649	1.01626	0.622261	0.206028	-0.0445835	0.96957	0.349023	0.457146	-0.0678754	0.954042	0.159791	0.796446	-0.0196878	0.986446	0.676484	0.169743	0.0516557	1.03645	0.375104	0.425849	-0.0161926	0.988839	0.779054	0.108432	-0.0394846	0.973003	0.496018	0.304503	0.00870301	1.00605	0.880059	0.0554882	-0.0678483	0.95406	0.247354	0.606681	-0.0911402	0.93878	0.125088	0.902785	-0.0429527
O43765	Small glutamine-rich tetratricopeptide repeat-containing protein alpha (Alpha-SGT) (Vpu-binding protein) (UBP)	SGTA SGT SGT1	SGTA	34,063	-0.160291	0.894844	0.0261355	1.58277	0.031465	1.02205	0.642505	0.192124	-0.0807296	0.945579	0.240609	0.618688	0.104646	1.07523	0.132612	0.877417	-0.0421821	0.971185	0.534624	0.271952	0.191756	1.14215	0.0293817	1.53192	0.0795618	1.0567	0.3421	0.465846	0.264937	1.20158	0.00407874	2.38947	0.118109	1.08531	0.164009	0.785134	-0.112195	0.92518	0.185136	0.732509	0.0731805	1.05203	0.381384	0.418638	-0.0736472
O43776	Asparagine--tRNA ligase, cytoplasmic (EC 6.1.1.22) (Asparaginyl-tRNA synthetase) (AsnRS) (Asparaginyl-tRNA synthetase 1)	NARS1 NARS NRS	NARS1	62,943	-0.350279	0.784432	3.17967e-07	6.49762	-0.0203813	0.985972	0.66846	0.174924	-0.265943	0.831655	1.46581e-05	4.83392	-0.203233	0.868602	0.000318289	3.49718	-0.349318	0.784955	3.31365e-07	6.47969	0.329898	1.25692	1.24522e-05	4.90475	0.0843365	1.0602	0.157445	0.80287	0.147047	1.1073	0.0186021	1.73044	0.000961545	1.00067	0.986807	0.00576762	-0.245562	0.843487	0.000364857	3.43788	-0.182852	0.88096	0.00464017	2.33347	-0.328937
O43809	Cleavage and polyadenylation specificity factor subunit 5 (Cleavage and polyadenylation specificity factor 25 kDa subunit) (CPSF 25 kDa subunit) (Cleavage factor Im complex 25 kDa subunit) (CFIm25) (Nucleoside diphosphate-linked moiety X motif 21) (Nudix motif 21) (Nudix hydrolase 21) (Pre-mRNA cleavage factor Im 68 kDa subunit)	NUDT21 CFIM25 CPSF25 CPSF5	NUDT21	26,227	0.0476151	1.03355	0.428885	0.367659	0.00753351	1.00524	0.899621	0.0459404	0.0894491	1.06396	0.144883	0.838983	0.0377856	1.02654	0.528939	0.276595	0.0630613	1.04468	0.297594	0.526376	-0.0400816	0.9726	0.585061	0.232799	0.041834	1.02942	0.568889	0.244972	-0.00982945	0.99321	0.893104	0.049098	0.0154462	1.01076	0.832815	0.0794516	0.0819156	1.05842	0.270075	0.568515	0.0302521	1.02119	0.679771	0.167638	0.0555278
O43813	Glutathione S-transferase LANCL1 (EC 2.5.1.18) (40 kDa erythrocyte membrane protein) (p40) (LanC-like protein 1)	LANCL1 GPR69A	LANCL1	45,283	0.0769191	1.05476	0.549867	0.259742	0.362202	1.28539	0.00955648	2.0197	0.375194	1.29701	0.00759261	2.11961	0.315584	1.24452	0.0213888	1.66981	0.1857	1.13737	0.157479	0.802776	0.285283	1.21865	0.0802973	1.0953	0.298275	1.22967	0.0683968	1.16496	0.238665	1.1799	0.138943	0.857163	0.108781	1.07832	0.490548	0.309319	0.0129922	1.00905	0.933984	0.0296607	-0.0466179	0.968203	0.766532	0.11547	-0.176502
O43818	U3 small nucleolar RNA-interacting protein 2 (RRP9 homolog) (U3 small nucleolar ribonucleoprotein-associated 55 kDa protein) (U3 snoRNP-associated 55 kDa protein) (U3-55K)	RRP9 RNU3IP2 U355K	RRP9	51,841	0.228974	1.172	0.054726	1.26181	-0.017025	0.988269	0.880967	0.0550404	0.292072	1.2244	0.0170077	1.76936	0.0417253	1.02934	0.71401	0.146296	0.0925715	1.06627	0.419253	0.377524	-0.245999	0.843232	0.0886397	1.05237	0.0630979	1.04471	0.651202	0.186284	-0.187249	0.878279	0.188274	0.725209	-0.136403	0.909785	0.332928	0.47765	0.309097	1.23893	0.0359255	1.4446	0.0587503	1.04156	0.673691	0.171539	0.109596
O43823	A-kinase anchor protein 8 (AKAP-8) (A-kinase anchor protein 95 kDa) (AKAP 95)	AKAP8 AKAP95	AKAP8	76,108	0.220181	1.16488	0.00749463	2.12525	0.034911	1.02449	0.642505	0.192124	0.0829212	1.05916	0.276148	0.558858	0.177726	1.1311	0.0262247	1.58129	-0.00563293	0.996103	0.940136	0.0268093	-0.18527	0.879485	0.0544631	1.2639	-0.13726	0.909245	0.145842	0.836117	-0.0424545	0.971002	0.644846	0.190544	-0.225814	0.855113	0.0216764	1.66401	0.0480103	1.03384	0.602462	0.22007	0.142815	1.10406	0.131037	0.882605	-0.0405439
O43852	Calumenin (Crocalbin) (IEF SSP 9302)	CALU	CALU	37,107	0.108548	1.07814	0.0238255	1.62296	-0.0584753	0.960278	0.202665	0.69322	0.132369	1.09609	0.00734934	2.13375	-0.169735	0.889006	0.00105516	2.97668	-0.117748	0.921625	0.0152552	1.81658	-0.167024	0.890678	0.0059939	2.22229	0.0238204	1.01665	0.666041	0.176499	-0.278283	0.824572	5.15661e-05	4.28764	-0.226297	0.854826	0.000477106	3.32139	0.190844	1.14143	0.00219104	2.65935	-0.11126	0.925779	0.0540606	1.26712	-0.0592729
O43854	EGF-like repeat and discoidin I-like domain-containing protein 3 (Developmentally-regulated endothelial cell locus 1 protein) (Integrin-binding protein DEL1)	EDIL3 DEL1	EDIL3	53,765	0.390996	1.3113	0.032405	1.48939	-0.234403	0.850037	0.183424	0.736544	1.07232	2.10281	3.64327e-06	5.43851	-0.84797	0.555566	7.00752e-05	4.15444	-0.460141	0.726915	0.0135955	1.86661	-0.625399	0.648241	0.00702237	2.15352	0.68132	1.60361	0.0038113	2.41893	-1.23897	0.423676	7.95411e-06	5.09941	-0.851136	0.554348	0.000571051	3.24333	1.30672	2.47378	3.90205e-06	5.40871	-0.613567	0.653579	0.00797949	2.09802	-0.225738
O43865	S-adenosylhomocysteine hydrolase-like protein 1 (DC-expressed AHCY-like molecule) (IP(3)Rs binding protein released with IP(3)) (IRBIT) (Putative adenosylhomocysteinase 2) (S-adenosyl-L-homocysteine hydrolase 2) (AdoHcyase 2)	AHCYL1 DCAL IRBIT XPVKONA	AHCYL1	58,951	0.129163	1.09366	0.0512689	1.29015	0.0647944	1.04594	0.31081	0.507506	-0.0176683	0.987828	0.779684	0.108082	0.527358	1.44129	4.61277e-08	7.33604	0.284678	1.21814	0.000184095	3.73496	-0.0643683	0.956364	0.408957	0.388323	-0.146831	0.903232	0.0686496	1.16336	0.398195	1.31786	4.10151e-05	4.38706	0.155515	1.11382	0.0549642	1.25992	-0.0824627	0.944444	0.292744	0.533512	0.462563	1.37799	6.17934e-06	5.20906	0.219883
O43896	Kinesin-like protein KIF1C	KIF1C KIAA0706	KIF1C	122,947	-0.191391	0.875761	0.389809	0.409148	-0.10024	0.932878	0.650208	0.186948	-0.0804926	0.945735	0.715503	0.145389	0.157836	1.11561	0.476893	0.321579	0.178727	1.13189	0.421386	0.37532	0.091151	1.06522	0.736056	0.133089	0.110898	1.0799	0.681935	0.166257	0.349227	1.27388	0.205125	0.687981	0.370118	1.29246	0.180368	0.743841	0.0197473	1.01378	0.941705	0.026085	0.258076	1.19588	0.344683	0.46258	0.278967
O60216	Double-strand-break repair protein rad21 homolog (hHR21) (Nuclear matrix protein 1) (NXP-1) (SCC1 homolog) [Cleaved into: 64-kDa C-terminal product (64-kDa carboxy-terminal product) (65-kDa carboxy-terminal product)]	RAD21 HR21 KIAA0078 NXP1 SCC1	RAD21	71,690	-0.193722	0.874347	0.142265	0.846903	0.0294789	1.02064	0.818572	0.086943	-0.332259	0.794292	0.0163685	1.78599	0.0965724	1.06923	0.455279	0.341722	-0.12633	0.916159	0.331102	0.480038	0.223201	1.16732	0.166155	0.779486	-0.138537	0.90844	0.383059	0.416734	0.290294	1.22289	0.0763014	1.11747	0.0673923	1.04782	0.669045	0.174545	-0.361737	0.778227	0.0304174	1.51688	0.0670935	1.0476	0.670419	0.173653	-0.155809
O60218	Aldo-keto reductase family 1 member B10 (EC 1.1.1.300) (EC 1.1.1.54) (ARL-1) (Aldose reductase-like) (Aldose reductase-related protein) (ARP) (hARP) (Small intestine reductase) (SI reductase)	AKR1B10 AKR1B11	AKR1B10	36,020	-0.335358	0.792588	0.00103756	2.98399	-0.495228	0.70945	1.5182e-05	4.81867	-0.048015	0.967266	0.589497	0.229519	-0.798503	0.574946	1.37973e-08	7.8602	-0.864368	0.549287	3.69876e-09	8.43194	-0.15987	0.895106	0.151551	0.819441	0.287342	1.22039	0.0143664	1.84265	-0.463145	0.725403	0.000329931	3.48158	-0.52901	0.69303	7.88818e-05	4.10302	0.447212	1.3634	0.000467386	3.33032	-0.303275	0.81041	0.010354	1.98489	-0.36914
O60220	Mitochondrial import inner membrane translocase subunit Tim8 A (Deafness dystonia protein 1) (X-linked deafness dystonia protein)	TIMM8A DDP DDP1 TIM8A	TIMM8A	10,998	0.0217085	1.01516	0.870209	0.0603762	0.111168	1.0801	0.406702	0.390723	0.288844	1.22166	0.0394947	1.40346	0.260014	1.19749	0.0612823	1.21267	0.408878	1.32765	0.00540267	2.26739	0.0894594	1.06397	0.583784	0.233748	0.267135	1.20342	0.111858	0.951332	0.238306	1.17961	0.153485	0.813934	0.38717	1.30783	0.0256422	1.59104	0.177676	1.13106	0.281805	0.550052	0.148846	1.10868	0.365176	0.437498	0.29771
O60231	Pre-mRNA-splicing factor ATP-dependent RNA helicase DHX16 (EC 3.6.4.13) (ATP-dependent RNA helicase #3) (DEAH-box protein 16)	DHX16 DBP2 DDX16 KIAA0577 PRP2	DHX16	119,264	-0.0589904	0.959936	0.573976	0.241106	-0.0861524	0.942032	0.4137	0.383314	-0.230859	0.852127	0.0367862	1.43431	0.218795	1.16376	0.0466484	1.33116	-0.171339	0.888018	0.112419	0.94916	-0.027162	0.981349	0.832035	0.0798583	-0.171869	0.887692	0.189006	0.723524	0.277785	1.21233	0.0398605	1.39946	-0.112348	0.925081	0.384648	0.414937	-0.144707	0.904563	0.265764	0.575503	0.304947	1.23537	0.0255131	1.59324	-0.0851863
O60264	SWI/SNF-related matrix-associated actin-dependent regulator of chromatin subfamily A member 5 (SWI/SNF-related matrix-associated actin-dependent regulator of chromatin A5) (EC 3.6.4.-) (Sucrose nonfermenting protein 2 homolog) (hSNF2H)	SMARCA5 SNF2H WCRF135	SMARCA5	121,905	-0.162859	0.893253	0.0139178	1.85643	-0.0734165	0.950385	0.238672	0.622199	-0.0074284	0.994864	0.903429	0.0441059	0.0162569	1.01133	0.790745	0.101963	-0.0570427	0.961232	0.356607	0.44781	0.0894429	1.06396	0.241069	0.617858	0.155431	1.11375	0.0486185	1.3132	0.179116	1.13219	0.0251526	1.59942	0.105817	1.0761	0.168318	0.773869	0.0659881	1.0468	0.383359	0.416394	0.0896735	1.06413	0.2399	0.61997	0.0163739
O60271	C-Jun-amino-terminal kinase-interacting protein 4 (JIP-4) (JNK-interacting protein 4) (Cancer/testis antigen 89) (CT89) (Human lung cancer oncogene 6 protein) (HLC-6) (JNK-associated leucine-zipper protein) (JLP) (Mitogen-activated protein kinase 8-interacting protein 4) (Proliferation-inducing protein 6) (Protein highly expressed in testis) (PHET) (Sperm surface protein) (Sperm-associated antige…	SPAG9 HSS KIAA0516 MAPK8IP4 SYD1 HLC6	SPAG9	146,205	0.0793688	1.05656	0.353944	0.451065	-0.0399054	0.972719	0.638448	0.194875	-0.109211	0.927095	0.206405	0.68528	0.14274	1.104	0.103303	0.985889	-0.0195383	0.986548	0.817668	0.0874231	-0.119274	0.920651	0.257928	0.588501	-0.18858	0.877469	0.0804438	1.09451	0.0633715	1.0449	0.543124	0.265101	-0.0989071	0.93374	0.34577	0.461213	-0.0693057	0.953097	0.506414	0.295495	0.182646	1.13496	0.0896992	1.04721	0.0203671
O60306	RNA helicase aquarius (EC 3.6.4.13) (Intron-binding protein of 160 kDa) (IBP160)	AQR KIAA0560	AQR	171,295	-0.165305	0.89174	0.120632	0.918536	-0.0652748	0.955763	0.529394	0.276221	-0.377051	0.77001	0.00141569	2.84903	0.0301626	1.02113	0.770463	0.113248	-0.33329	0.793724	0.00382733	2.4171	0.10003	1.0718	0.432606	0.363908	-0.211746	0.863492	0.10547	0.976871	0.195468	1.1451	0.133216	0.875443	-0.167985	0.890085	0.193651	0.71298	-0.311776	0.805649	0.0213595	1.67041	0.0954374	1.06839	0.45372	0.343212	-0.268016
O60313	Dynamin-like 120 kDa protein, mitochondrial (EC 3.6.5.5) (Optic atrophy protein 1) [Cleaved into: Dynamin-like 120 kDa protein, form S1]	OPA1 KIAA0567	OPA1	111,631	0.204993	1.15268	0.179771	0.745281	0.0649507	1.04605	0.664375	0.177587	-0.277648	0.824935	0.0743218	1.12888	0.404458	1.32359	0.0125152	1.90256	0.267601	1.2038	0.0845716	1.07278	-0.140042	0.907493	0.447219	0.349479	-0.482641	0.715666	0.0146053	1.83549	0.199466	1.14827	0.282543	0.548915	0.0626085	1.04435	0.732504	0.13519	-0.342599	0.788619	0.0723389	1.14063	0.339508	1.26532	0.0747479	1.1264	0.20265
O60318	Germinal-center associated nuclear protein (GANP) (EC 2.3.1.48) (80 kDa MCM3-associated protein) (MCM3 acetylating protein) (MCM3AP) (EC 2.3.1.-) (MCM3 acetyltransferase)	MCM3AP GANP KIAA0572 MAP80	MCM3AP	218,405	0.0119297	1.0083	0.954324	0.0203042	0.692529	1.61611	0.00304786	2.516	0.30079	1.23182	0.159105	0.798316	0.15146	1.11069	0.470034	0.327871	0.273965	1.20913	0.19779	0.703795	0.6806	1.60281	0.0136827	1.86383	0.28886	1.22167	0.264999	0.576755	0.13953	1.10155	0.585785	0.232262	0.262035	1.19917	0.310621	0.507769	-0.39174	0.76221	0.135541	0.86793	-0.54107	0.687261	0.0440932	1.35563	-0.418565
O60341	Lysine-specific histone demethylase 1A (EC 1.-.-.-) (BRAF35-HDAC complex protein BHC110) (Flavin-containing amine oxidase domain-containing protein 2)	KDM1A AOF2 KDM1 KIAA0601 LSD1	KDM1A	92,903	-0.0340906	0.976647	0.67169	0.172831	0.13724	1.0998	0.0986659	1.00583	-0.0890615	0.940134	0.274389	0.561634	0.033763	1.02368	0.67465	0.170921	-0.0382748	0.973819	0.634382	0.197649	0.171331	1.1261	0.0927455	1.03271	-0.0549709	0.962614	0.577468	0.238472	0.0678536	1.04816	0.492563	0.307538	-0.00418422	0.997104	0.966044	0.015003	-0.226302	0.854823	0.0302463	1.51933	-0.103477	0.930787	0.299066	0.524233	-0.175515
O60343	TBC1 domain family member 4 (Akt substrate of 160 kDa) (AS160)	TBC1D4 AS160 KIAA0603	TBC1D4	146,563	-0.485799	0.714101	0.423381	0.373268	0.00803366	1.00558	0.989351	0.00464973	-0.221121	0.857899	0.713806	0.14642	-0.12864	0.914693	0.830858	0.0804734	-0.678304	0.624899	0.267253	0.573078	0.493833	1.40818	0.50532	0.296433	0.264679	1.20137	0.719996	0.14267	0.357159	1.2809	0.629046	0.201318	-0.192505	0.875085	0.794157	0.100094	-0.229154	0.853135	0.756197	0.121365	-0.136674	0.909614	0.852975	0.0690635	-0.686338
O60488	Long-chain-fatty-acid--CoA ligase 4 (EC 6.2.1.3) (Arachidonate--CoA ligase) (EC 6.2.1.15) (Long-chain acyl-CoA synthetase 4) (LACS 4)	ACSL4 ACS4 FACL4 LACS4	ACSL4	79,188	-0.587379	0.665551	0.000427604	3.36896	-0.157518	0.896566	0.272408	0.56478	-0.638058	0.642577	0.000182812	3.738	-0.362622	0.77775	0.0171552	1.7656	-0.423645	0.745539	0.00650793	2.18656	0.429861	1.3471	0.0205319	1.68757	-0.0506795	0.965482	0.769933	0.113547	0.224757	1.16858	0.203407	0.691633	0.163734	1.12018	0.349566	0.45647	-0.480541	0.716709	0.0107529	1.96847	-0.205104	0.867476	0.244185	0.612282	-0.266128
O60493	Sorting nexin-3 (Protein SDP3)	SNX3	SNX3	18,762	0.0790004	1.05629	0.111583	0.952401	-0.0563233	0.961712	0.24927	0.60333	-0.0105072	0.992743	0.827066	0.0824598	-0.0145453	0.989969	0.762454	0.117786	-0.0548014	0.962727	0.261871	0.581912	-0.135324	0.910466	0.0304839	1.51593	-0.0895076	0.939843	0.139268	0.856148	-0.0935457	0.937217	0.123211	0.909352	-0.133802	0.911426	0.0321898	1.49228	0.0458162	1.03227	0.439879	0.356666	0.041778	1.02938	0.480679	0.318145	0.00152187
O60502	Protein O-GlcNAcase (OGA) (EC 3.2.1.169) (Beta-N-acetylglucosaminidase) (Beta-N-acetylhexosaminidase) (Beta-hexosaminidase) (Meningioma-expressed antigen 5) (N-acetyl-beta-D-glucosaminidase) (N-acetyl-beta-glucosaminidase) (Nuclear cytoplasmic O-GlcNAcase and acetyltransferase) (NCOAT)	OGA HEXC KIAA0679 MEA5 MGEA5	OGA	102,915	0.0582894	1.04123	0.693436	0.158994	-0.0106402	0.992652	0.942527	0.0257062	0.0468654	1.03302	0.751123	0.124289	0.138234	1.10056	0.35418	0.450776	-0.000219227	0.999848	0.998815	0.000515058	-0.0689296	0.953345	0.703453	0.152765	-0.0114241	0.992113	0.949605	0.0224568	0.0799449	1.05698	0.659056	0.181078	-0.0585086	0.960256	0.746484	0.12698	0.0575055	1.04066	0.750674	0.124549	0.148875	1.1087	0.414091	0.382904	0.010421
O60506	Heterogeneous nuclear ribonucleoprotein Q (hnRNP Q) (Glycine- and tyrosine-rich RNA-binding protein) (GRY-RBP) (NS1-associated protein 1) (Synaptotagmin-binding, cytoplasmic RNA-interacting protein)	SYNCRIP HNRPQ NSAP1	SYNCRIP	69,603	-0.0314248	0.978454	0.319622	0.495363	0.0568773	1.04021	0.0795066	1.0996	0.000999538	1.00069	0.974427	0.0112509	0.0992065	1.07118	0.00425566	2.37103	0.0263996	1.01847	0.401387	0.396437	0.0883021	1.06312	0.0296188	1.52843	0.0324243	1.02273	0.400078	0.397855	0.130631	1.09477	0.00243613	2.6133	0.0578243	1.04089	0.140806	0.851379	-0.0558778	0.962009	0.153948	0.812626	0.0423292	1.02978	0.274938	0.560766	-0.0304778
O60568	Multifunctional procollagen lysine hydroxylase and glycosyltransferase LH3 [Includes: Procollagen-lysine,2-oxoglutarate 5-dioxygenase 3 (EC 1.14.11.4) (Lysyl hydroxylase 3) (LH3); Procollagen glycosyltransferase (EC 2.4.1.50) (EC 2.4.1.66) (Galactosylhydroxylysine-glucosyltransferase) (Procollagen galactosyltransferase) (Procollagen glucosyltransferase)]	PLOD3	PLOD3	84,785	0.0215255	1.01503	0.874973	0.0580053	0.0749532	1.05333	0.585076	0.232788	0.0428462	1.03014	0.754355	0.122424	-0.0395639	0.972949	0.772593	0.112049	0.0249217	1.01742	0.855465	0.0677978	0.0534276	1.03773	0.750058	0.124905	0.0213207	1.01489	0.898732	0.0463696	-0.0610895	0.95854	0.715781	0.14522	0.00339614	1.00236	0.983824	0.00708278	-0.0321069	0.977991	0.848059	0.071574	-0.114517	0.923691	0.496701	0.303905	-0.0500315
O60664	Perilipin-3 (47 kDa mannose 6-phosphate receptor-binding protein) (47 kDa MPR-binding protein) (Cargo selection protein TIP47) (Mannose-6-phosphate receptor-binding protein 1) (Placental protein 17) (PP17)	PLIN3 M6PRBP1 TIP47	PLIN3	47,075	0.0913482	1.06537	0.162325	0.789614	-0.16955	0.88912	0.0139643	1.85498	0.0448367	1.03157	0.484664	0.314559	-0.179686	0.882895	0.00978618	2.00939	-0.17081	0.888344	0.013365	1.87403	-0.260898	0.834568	0.00293841	2.53189	-0.0465115	0.968275	0.553229	0.257095	-0.271034	0.828725	0.00216736	2.66407	-0.262158	0.83384	0.00282958	2.54828	0.214386	1.16021	0.0115243	1.93839	-0.0101361	0.992999	0.896751	0.0473279	-0.00125999
O60684	Importin subunit alpha-7 (Karyopherin subunit alpha-6)	KPNA6 IPOA7	KPNA6	60,030	0.00433959	1.00301	0.961792	0.0169188	-0.101964	0.931764	0.267805	0.572182	-0.176879	0.884614	0.0619007	1.2083	0.188933	1.13992	0.0474055	1.32417	0.0572811	1.0405	0.529236	0.276351	-0.106304	0.928965	0.34349	0.464086	-0.181219	0.881958	0.113675	0.944337	0.184593	1.1365	0.107506	0.968567	0.0529415	1.03738	0.634201	0.197773	-0.0749154	0.949398	0.501966	0.299325	0.290896	1.2234	0.0151565	1.8194	0.159245
O60701	UDP-glucose 6-dehydrogenase (UDP-Glc dehydrogenase) (UDP-GlcDH) (UDPGDH) (EC 1.1.1.22)	UGDH	UGDH	55,024	0.535475	1.44942	2.76119e-10	9.5589	-0.199352	0.870942	0.000367406	3.43485	0.0172755	1.01205	0.715058	0.145659	0.566705	1.48114	1.01247e-10	9.99462	0.29365	1.22574	3.71378e-06	5.43018	-0.734827	0.60089	3.63929e-11	10.439	-0.5182	0.698243	1.51119e-08	7.82068	0.0312296	1.02188	0.590727	0.228613	-0.241825	0.845675	0.000404267	3.39333	0.216628	1.16201	0.00113636	2.94449	0.766057	1.70062	1.71223e-11	10.7664	0.493003
O60749	Sorting nexin-2 (Transformation-related gene 9 protein) (TRG-9)	SNX2 TRG9	SNX2	58,471	-0.037721	0.974193	0.750043	0.124914	0.104081	1.07481	0.383367	0.416385	-0.121118	0.919475	0.312013	0.505828	0.340999	1.26663	0.00843494	2.07392	0.275005	1.21	0.0287989	1.54062	0.141802	1.10328	0.333284	0.477185	-0.0833973	0.943832	0.566345	0.246919	0.37872	1.30019	0.0153933	1.81267	0.312726	1.24205	0.0407741	1.38962	-0.225199	0.855477	0.130987	0.88277	0.236917	1.17847	0.113168	0.946275	0.170924
O60763	General vesicular transport factor p115 (Protein USO1 homolog) (Transcytosis-associated protein) (TAP) (Vesicle-docking protein)	USO1 VDP	USO1	107,895	0.156465	1.11455	0.102657	0.988611	0.0482529	1.03401	0.603734	0.219154	-0.00771984	0.994663	0.9336	0.0298393	0.143523	1.1046	0.132362	0.878237	0.238295	1.1796	0.0169193	1.77162	-0.108213	0.927737	0.345717	0.46128	-0.164185	0.892432	0.158364	0.800343	-0.0129428	0.991069	0.909203	0.0413391	0.0818295	1.05836	0.473706	0.324491	-0.0559727	0.961946	0.622884	0.205593	0.0952698	1.06827	0.405276	0.392249	0.190042
O60828	Polyglutamine-binding protein 1 (PQBP-1) (38 kDa nuclear protein containing a WW domain) (Npw38) (Polyglutamine tract-binding protein 1)	PQBP1 NPW38 JM26	PQBP1	30,472	0.0386936	1.02718	0.760895	0.118675	0.188343	1.13945	0.148756	0.827525	0.112495	1.0811	0.380417	0.419741	0.0254702	1.01781	0.841134	0.0751349	0.18495	1.13678	0.155834	0.807338	0.149649	1.1093	0.341572	0.466518	0.0738012	1.05249	0.636132	0.196452	-0.0132235	0.990876	0.932258	0.0304639	0.146256	1.10669	0.352385	0.452983	-0.0758478	0.948784	0.626856	0.202832	-0.162872	0.893245	0.301625	0.520533	-0.00339263
O60832	H/ACA ribonucleoprotein complex subunit DKC1 (EC 5.4.99.-) (CBF5 homolog) (Dyskerin) (Nopp140-associated protein of 57 kDa) (Nucleolar protein NAP57) (Nucleolar protein family A member 4) (snoRNP protein DKC1)	DKC1 NOLA4	DKC1	57,674	0.0937357	1.06713	0.185122	0.732543	0.089776	1.0642	0.203569	0.691287	0.127082	1.09208	0.0775239	1.11056	0.215687	1.16126	0.00492858	2.30728	0.134389	1.09763	0.0630936	1.20001	-0.00395977	0.997259	0.962718	0.0165007	0.0333464	1.02338	0.694412	0.158383	0.121951	1.08821	0.160383	0.794842	0.0406533	1.02858	0.632289	0.199084	0.0373062	1.0262	0.660436	0.180169	0.125911	1.0912	0.14788	0.830092	0.0446131
O60869	Endothelial differentiation-related factor 1 (EDF-1) (Multiprotein-bridging factor 1) (MBF1)	EDF1	EDF1	16,369	0.279332	1.21363	0.0087386	2.05856	-0.0558146	0.962051	0.568188	0.245508	0.272674	1.20804	0.0101973	1.99152	-0.275344	0.826253	0.00958618	2.01835	-0.0463906	0.968356	0.634813	0.197354	-0.335146	0.792704	0.00997059	2.00128	-0.00665822	0.995396	0.955487	0.0197751	-0.554676	0.68081	0.000132757	3.87694	-0.325722	0.797899	0.0119047	1.92428	0.328488	1.2557	0.0113028	1.94681	-0.21953	0.858845	0.07706	1.11317	0.00942399
O60884	DnaJ homolog subfamily A member 2 (Cell cycle progression restoration gene 3 protein) (Dnj3) (Dj3) (HIRA-interacting protein 4) (Renal carcinoma antigen NY-REN-14)	DNAJA2 CPR3 HIRIP4	DNAJA2	45,746	-0.219424	0.858908	0.00558354	2.25309	-0.0689901	0.953305	0.340904	0.467367	-0.143346	0.905417	0.0561357	1.25076	0.0720148	1.05118	0.320648	0.493971	-0.116724	0.92228	0.114382	0.941644	0.150434	1.1099	0.09772	1.01002	0.0760779	1.05415	0.390147	0.408772	0.291439	1.22386	0.00306288	2.51387	0.1027	1.07378	0.249573	0.602803	-0.0743559	0.949766	0.400769	0.397105	0.141005	1.10267	0.119108	0.924057	-0.0477337
O60888	Protein CutA (Acetylcholinesterase-associated protein) (Brain acetylcholinesterase putative membrane anchor)	CUTA ACHAP C6orf82	CUTA	19,116	0.197152	1.14643	0.140517	0.852271	-0.0233117	0.983971	0.85785	0.0665887	0.22693	1.17034	0.092548	1.03363	0.0745617	1.05304	0.568168	0.245523	0.12282	1.08886	0.35049	0.455324	-0.220464	0.858289	0.17647	0.753328	0.0297774	1.02085	0.851818	0.0696533	-0.122591	0.918537	0.44505	0.351591	-0.0743321	0.949782	0.641768	0.192622	0.250241	1.18941	0.127391	0.894861	0.0978733	1.07019	0.540972	0.266825	0.146132
O60925	Prefoldin subunit 1	PFDN1 PFD1	PFDN1	14,210	-0.0300523	0.979385	0.489099	0.310603	-0.0206514	0.985788	0.633452	0.198286	-0.05063	0.965515	0.248989	0.60382	0.0636125	1.04508	0.151322	0.820099	0.0536172	1.03786	0.223075	0.651549	0.00940088	1.00654	0.858968	0.0660228	-0.0205778	0.985838	0.697753	0.156298	0.0936648	1.06708	0.0879821	1.05561	0.0836695	1.05971	0.124769	0.903895	-0.0299787	0.979435	0.572367	0.242325	0.0842639	1.06015	0.122265	0.912696	0.0742686
O60942	mRNA-capping enzyme (HCAP1) (HCE) [Includes: Polynucleotide 5'-triphosphatase (EC 3.1.3.33) (mRNA 5'-triphosphatase) (TPase); mRNA guanylyltransferase (EC 2.7.7.50) (GTP--RNA guanylyltransferase) (GTase)]	RNGTT CAP1A	RNGTT	68,557	-0.00861073	0.994049	0.93735	0.0280983	-0.0778093	0.947495	0.480288	0.318498	-0.0719295	0.951365	0.513694	0.289296	-0.138471	0.908481	0.215138	0.667283	-0.219583	0.858814	0.0558261	1.25316	-0.0691985	0.953167	0.607207	0.216664	-0.0633188	0.95706	0.637897	0.195249	-0.129861	0.91392	0.338697	0.470189	-0.210972	0.863955	0.126926	0.896448	0.00587977	1.00408	0.965043	0.0154531	-0.060662	0.958824	0.651992	0.185758	-0.141774
O75083	WD repeat-containing protein 1 (Actin-interacting protein 1) (AIP1) (NORI-1)	WDR1	WDR1	66,194	0.259692	1.19722	0.000182743	3.73816	-0.0705947	0.952245	0.228292	0.641509	0.292054	1.22438	4.88418e-05	4.31121	-0.109928	0.926635	0.0671745	1.1728	-0.0329981	0.977387	0.567798	0.245806	-0.330287	0.795378	0.000121344	3.91598	0.0323627	1.02269	0.646839	0.189203	-0.369619	0.773987	3.30006e-05	4.48148	-0.29269	0.816378	0.000428952	3.36759	0.362649	1.28578	4.14844e-05	4.38211	-0.0393329	0.973105	0.57812	0.237982	0.0375966
O75113	NEDD4-binding protein 1 (N4BP1)	N4BP1 KIAA0615	N4BP1	100,379	-0.299721	0.812409	0.0981137	1.00827	-0.220385	0.858336	0.216691	0.664159	-0.502387	0.705938	0.00867109	2.06193	-0.0531693	0.963817	0.761473	0.118346	-0.496499	0.708825	0.00935711	2.02886	0.079336	1.05653	0.711672	0.14772	-0.202666	0.868944	0.34961	0.456417	0.246552	1.18637	0.257639	0.588989	-0.196778	0.872497	0.363487	0.439511	-0.282002	0.822449	0.197583	0.704251	0.167216	1.12289	0.438663	0.357869	-0.276114
O75131	Copine-3 (Copine III)	CPNE3 CPN3 KIAA0636	CPNE3	60,131	-0.160418	0.894766	0.0402158	1.3956	-0.0952368	0.936119	0.20763	0.68271	-0.0372561	0.974507	0.616063	0.210375	0.0893069	1.06386	0.236232	0.626662	-0.0962856	0.935438	0.202864	0.692795	0.0651814	1.04622	0.475255	0.323073	0.123162	1.08912	0.184318	0.734433	0.249725	1.18898	0.0113229	1.94604	0.0641325	1.04546	0.482299	0.316684	0.0579807	1.04101	0.524819	0.27999	0.184544	1.13646	0.0525738	1.27923	-0.00104882
O75165	DnaJ homolog subfamily C member 13 (Required for receptor-mediated endocytosis 8) (RME-8)	DNAJC13 KIAA0678 RME8	DNAJC13	254,415	-0.294727	0.815226	0.0228307	1.64148	0.146067	1.10655	0.236014	0.627063	-0.0740267	0.949983	0.542825	0.26534	-0.0656641	0.955505	0.588964	0.229911	-0.12888	0.914541	0.293887	0.53182	0.440795	1.35735	0.00688906	2.16184	0.220701	1.1653	0.147361	0.831618	0.229063	1.17207	0.133395	0.87486	0.165848	1.12182	0.270774	0.567393	-0.220094	0.85851	0.148419	0.82851	-0.211731	0.8635	0.163654	0.786075	-0.274947
O75223	Gamma-glutamylcyclotransferase (EC 4.3.2.9) (Cytochrome c-releasing factor 21)	GGCT C7orf24 CRF21	GGCT	21,008	-0.016024	0.988954	0.811523	0.0906993	-0.00715742	0.995051	0.915126	0.038519	0.0816062	1.0582	0.232704	0.633196	-0.0156607	0.989204	0.815713	0.0884627	-0.00676538	0.995322	0.919758	0.0363265	0.00886662	1.00616	0.914156	0.0389795	0.0976303	1.07001	0.24333	0.613805	0.000363345	1.00025	0.996475	0.00153364	0.00925866	1.00644	0.910378	0.0407785	0.0887636	1.06346	0.287388	0.541531	-0.00850327	0.994123	0.91766	0.037318	0.000392043
O75306	NADH dehydrogenase [ubiquinone] iron-sulfur protein 2, mitochondrial (EC 1.6.99.3) (EC 7.1.1.2) (Complex I-49kD) (CI-49kD) (NADH-ubiquinone oxidoreductase 49 kDa subunit)	NDUFS2	NDUFS2	52,546	-0.00697007	0.99518	0.924969	0.0338729	0.0312255	1.02188	0.673751	0.1715	-0.0719167	0.951373	0.336817	0.472606	0.0647387	1.0459	0.386213	0.413173	0.0482866	1.03404	0.516326	0.287076	0.0381956	1.02683	0.674133	0.171254	-0.0649467	0.955981	0.476476	0.321959	0.0717088	1.05096	0.432443	0.364071	0.0552567	1.03904	0.543968	0.264427	-0.103142	0.931003	0.262731	0.580489	0.0335132	1.0235	0.712034	0.147499	0.0170611
O75340	Programmed cell death protein 6 (Apoptosis-linked gene 2 protein homolog) (ALG-2)	PDCD6 ALG2	PDCD6	21,868	0.234513	1.17651	0.000289388	3.53852	0.0774809	1.05517	0.163765	0.785779	0.130151	1.09441	0.0246898	1.60748	0.274971	1.20997	5.01574e-05	4.29966	0.234128	1.1762	0.000294285	3.53123	-0.157032	0.896868	0.0266453	1.57438	-0.104361	0.930217	0.127537	0.894365	0.040458	1.02844	0.544669	0.263867	-0.00038415	0.999734	0.995389	0.00200702	0.0526704	1.03718	0.431806	0.364711	0.19749	1.1467	0.00691799	2.16002	0.156648
O75348	V-type proton ATPase subunit G 1 (V-ATPase subunit G 1) (V-ATPase 13 kDa subunit 1) (Vacuolar proton pump subunit G 1) (Vacuolar proton pump subunit M16)	ATP6V1G1 ATP6G ATP6G1 ATP6J	ATP6V1G1	13,758	-0.0883504	0.940598	0.320708	0.49389	-0.181475	0.881801	0.0493928	1.30634	-0.0685993	0.953563	0.438447	0.358083	-0.152926	0.899424	0.0932081	1.03055	-0.317214	0.802618	0.00155932	2.80707	-0.0931248	0.93749	0.391256	0.407539	0.0197511	1.01378	0.854432	0.0683223	-0.0645759	0.956226	0.550253	0.259437	-0.228864	0.853307	0.0435915	1.3606	0.112876	1.08138	0.300794	0.521731	0.0285489	1.01999	0.79096	0.101846	-0.135739
O75351	Vacuolar protein sorting-associated protein 4B (EC 3.6.4.6) (Cell migration-inducing gene 1 protein) (Suppressor of K(+) transport growth defect 1) (Protein SKD1)	VPS4B SKD1 VPS42 MIG1	VPS4B	49,302	0.107522	1.07738	0.439443	0.357097	-0.0704169	0.952363	0.611089	0.213895	0.0655312	1.04647	0.635897	0.196614	-0.0471944	0.967817	0.732778	0.135027	-0.0367987	0.974816	0.789948	0.102401	-0.177939	0.883965	0.299135	0.524133	-0.0419911	0.971314	0.803968	0.0947612	-0.154717	0.898309	0.365062	0.437634	-0.144321	0.904805	0.397535	0.400624	0.135948	1.09881	0.425013	0.371598	0.0232225	1.01623	0.890757	0.0502405	0.0336182
O75367	Core histone macro-H2A.1 (Histone macroH2A1) (mH2A1) (Histone H2A.y) (H2A/y) (Medulloblastoma antigen MU-MB-50.205)	H2AFY MACROH2A1	H2AFY	39,617	-0.0783123	0.947165	0.567071	0.246362	0.0770916	1.05489	0.57308	0.241784	-0.206373	0.866713	0.140709	0.851678	0.122966	1.08897	0.371663	0.429851	-0.00839781	0.994196	0.950857	0.0218849	0.155404	1.11373	0.356917	0.447432	-0.128061	0.91506	0.446199	0.350471	0.201278	1.14972	0.236113	0.626879	0.0699145	1.04965	0.675922	0.170104	-0.283465	0.821615	0.100795	0.996562	0.045874	1.03231	0.783595	0.105908	-0.0854894
O75368	SH3 domain-binding glutamic acid-rich-like protein	SH3BGRL	SH3BGRL	12,774	0.407451	1.32634	5.29023e-06	5.27653	0.212028	1.15832	0.00456851	2.34023	0.556543	1.47074	5.43885e-08	7.26449	0.345324	1.27044	4.30021e-05	4.36651	0.566208	1.48063	4.13671e-08	7.38334	-0.195423	0.873317	0.0261255	1.58293	0.149091	1.10887	0.0818254	1.08711	-0.0621269	0.957851	0.454131	0.342819	0.158757	1.11632	0.0651756	1.18592	0.344514	1.26972	0.000403329	3.39434	0.133296	1.0968	0.11702	0.931742	0.35418
O75369	Filamin-B (FLN-B) (ABP-278) (ABP-280 homolog) (Actin-binding-like protein) (Beta-filamin) (Filamin homolog 1) (Fh1) (Filamin-3) (Thyroid autoantigen) (Truncated actin-binding protein) (Truncated ABP)	FLNB FLN1L FLN3 TABP TAP	FLNB	278,164	0.583724	1.49871	1.09876e-10	9.9591	0.0212785	1.01486	0.664108	0.177761	0.54238	1.45637	4.01594e-10	9.39621	-0.0753177	0.949133	0.134346	0.871775	0.211398	1.15781	0.000286664	3.54263	-0.562446	0.677153	6.87726e-09	8.16258	-0.0413441	0.971749	0.492434	0.307652	-0.659042	0.633299	4.61102e-10	9.3362	-0.372326	0.772536	3.69033e-06	5.43293	0.521102	1.43505	2.40559e-08	7.61878	-0.0965962	0.935237	0.117892	0.928517	0.19012
O75390	Citrate synthase, mitochondrial (EC 2.3.3.1) (Citrate (Si)-synthase)	CS	CS	51,712	-0.10956	0.926871	0.247165	0.607014	-0.0428493	0.970736	0.646107	0.189696	0.0122874	1.00855	0.894987	0.0481834	-0.196047	0.872939	0.0454395	1.34257	-0.113247	0.924505	0.232143	0.634244	0.0667102	1.04733	0.560071	0.251757	0.121847	1.08813	0.291904	0.534761	-0.0864875	0.941813	0.451264	0.345569	-0.00368724	0.997447	0.974194	0.0113543	0.0551368	1.03896	0.629597	0.200937	-0.153198	0.899255	0.188619	0.724414	-0.0703975
O75431	Metaxin-2 (Mitochondrial outer membrane import complex protein 2)	MTX2	MTX2	29,763	0.157645	1.11546	0.146488	0.834199	0.178596	1.13178	0.102431	0.989568	-0.0778926	0.947441	0.464126	0.333364	0.265423	1.20199	0.0193086	1.71425	0.182401	1.13477	0.0957807	1.01872	0.0209507	1.01463	0.871451	0.0597572	-0.235538	0.849368	0.0801753	1.09596	0.107778	1.07757	0.40907	0.388202	0.024756	1.01731	0.848383	0.0714082	-0.256488	0.837123	0.058433	1.23334	0.0868269	1.06203	0.504731	0.29694	0.00380535
O75436	Vacuolar protein sorting-associated protein 26A (Vesicle protein sorting 26A) (hVPS26)	VPS26A VPS26	VPS26A	38,170	0.225147	1.1689	0.0698035	1.15612	-0.161224	0.894266	0.185364	0.731976	-0.0448784	0.969372	0.706662	0.150788	0.114276	1.08243	0.342578	0.46524	0.0817844	1.05833	0.494604	0.305742	-0.386371	0.765052	0.0142391	1.84652	-0.270026	0.829305	0.0753311	1.12303	-0.110871	0.926029	0.450243	0.346553	-0.143363	0.905406	0.331237	0.479862	0.116345	1.08399	0.428526	0.368022	0.2755	1.21041	0.0700355	1.15468	0.243008
O75475	PC4 and SFRS1-interacting protein (CLL-associated antigen KW-7) (Dense fine speckles 70 kDa protein) (DFS 70) (Lens epithelium-derived growth factor) (Transcriptional coactivator p75/p52)	PSIP1 DFS70 LEDGF PSIP2	PSIP1	60,103	0.0499221	1.03521	0.641167	0.193029	0.0567366	1.04011	0.596623	0.2243	-0.105594	0.929422	0.328764	0.483116	0.104015	1.07476	0.335877	0.473819	0.27786	1.2124	0.015867	1.7995	0.00681447	1.00473	0.95846	0.0184261	-0.155516	0.897811	0.242718	0.614899	0.0540929	1.03821	0.679913	0.167547	0.227938	1.17116	0.0928937	1.03201	-0.162331	0.89358	0.223387	0.650941	0.0472785	1.03331	0.718257	0.14372	0.221124
O75489	NADH dehydrogenase [ubiquinone] iron-sulfur protein 3, mitochondrial (EC 1.6.99.3) (EC 7.1.1.2) (Complex I-30kD) (CI-30kD) (NADH-ubiquinone oxidoreductase 30 kDa subunit)	NDUFS3	NDUFS3	30,242	-0.124429	0.917367	0.373868	0.427282	0.0982483	1.07047	0.480946	0.317904	0.124339	1.09001	0.37421	0.426885	-0.00854503	0.994095	0.950816	0.0219037	0.0285055	1.01995	0.83705	0.0772484	0.222678	1.1669	0.19875	0.701694	0.248768	1.18819	0.153142	0.814906	0.115884	1.08364	0.497102	0.303554	0.152935	1.11183	0.372209	0.429213	0.0260904	1.01825	0.877818	0.0565955	-0.106793	0.92865	0.531097	0.274826	-0.0697428
O75531	Barrier-to-autointegration factor (Breakpoint cluster region protein 1) [Cleaved into: Barrier-to-autointegration factor, N-terminally processed]	BANF1 BAF BCRG1	BANF1	10,059	0.0284665	1.01993	0.624988	0.204128	0.116523	1.08412	0.0555701	1.25516	0.120654	1.08723	0.048149	1.31741	-0.126813	0.915852	0.0387395	1.41185	0.0110602	1.0077	0.848995	0.071095	0.0880567	1.06294	0.224295	0.64918	0.0921876	1.06599	0.204095	0.690167	-0.15528	0.897958	0.038778	1.41141	-0.0174064	0.988007	0.806773	0.0932486	0.00413093	1.00287	0.953678	0.0205982	-0.243336	0.844789	0.00242994	2.6144	-0.105463
O75533	Splicing factor 3B subunit 1 (Pre-mRNA-splicing factor SF3b 155 kDa subunit) (SF3b155) (Spliceosome-associated protein 155) (SAP 155)	SF3B1 SAP155	SF3B1	145,830	-0.138545	0.908435	0.0184583	1.73381	-0.0390261	0.973312	0.478473	0.320143	-0.198066	0.871718	0.00152354	2.81715	0.0517532	1.03652	0.34956	0.456478	-0.0624009	0.957669	0.261708	0.582184	0.0995193	1.07142	0.148181	0.829207	-0.0595211	0.959583	0.379095	0.421252	0.190299	1.141	0.00931372	2.03088	0.0761445	1.0542	0.263408	0.57937	-0.15904	0.895621	0.0260127	1.58482	0.0907793	1.06495	0.185265	0.732207	-0.0233748
O75534	Cold shock domain-containing protein E1 (N-ras upstream gene protein) (Protein UNR)	CSDE1 D1S155E KIAA0885 NRU UNR	CSDE1	88,885	-0.0495421	0.966243	0.30103	0.52139	-0.1612	0.894281	0.00249111	2.60361	-0.24297	0.845004	4.20613e-05	4.37612	0.0948481	1.06795	0.0555361	1.25542	-0.0214185	0.985263	0.651208	0.186281	-0.111658	0.925524	0.064814	1.18833	-0.193428	0.874525	0.00292892	2.53329	0.14439	1.10526	0.0200242	1.69845	0.0281236	1.01969	0.628034	0.202017	-0.0817703	0.944897	0.167905	0.774936	0.256048	1.1942	0.000226379	3.64516	0.139781
O75569	Interferon-inducible double-stranded RNA-dependent protein kinase activator A (PKR-associated protein X) (PKR-associating protein X) (Protein activator of the interferon-induced protein kinase) (Protein kinase, interferon-inducible double-stranded RNA-dependent activator)	PRKRA PACT RAX HSD-14 HSD14	PRKRA	34,404	0.180457	1.13324	0.471792	0.326249	0.51077	1.42481	0.0509457	1.29289	0.356023	1.27989	0.163334	0.786923	0.00441795	1.00307	0.985852	0.00618821	0.290676	1.22321	0.25126	0.599877	0.330313	1.25729	0.286004	0.543628	0.175566	1.12941	0.566659	0.246678	-0.176039	0.88513	0.565623	0.247473	0.110219	1.07939	0.718385	0.143643	-0.154747	0.89829	0.613207	0.212393	-0.506352	0.704	0.108381	0.965048	-0.220094
O75607	Nucleoplasmin-3	NPM3	NPM3	19,344	-0.167225	0.890554	0.158138	0.800963	-0.0689894	0.953306	0.552106	0.257977	0.0301392	1.02111	0.794317	0.100006	-0.219663	0.858766	0.0684129	1.16486	-0.0807971	0.945535	0.486914	0.312548	0.0982355	1.07046	0.490052	0.309758	0.197364	1.1466	0.173058	0.761809	-0.0524377	0.964306	0.711358	0.147912	0.0864278	1.06174	0.54313	0.265097	0.0991286	1.07113	0.486162	0.313219	-0.150673	0.90083	0.293611	0.532228	-0.0118077
O75643	U5 small nuclear ribonucleoprotein 200 kDa helicase (EC 3.6.4.13) (Activating signal cointegrator 1 complex subunit 3-like 1) (BRR2 homolog) (U5 snRNP-specific 200 kDa protein) (U5-200KD)	SNRNP200 ASCC3L1 HELIC2 KIAA0788	SNRNP200	244,508	-0.285436	0.820494	2.45669e-06	5.60965	-0.108496	0.927554	0.0228077	1.64192	-0.312304	0.805355	6.80654e-07	6.16707	-0.251742	0.839882	1.3143e-05	4.88131	-0.266455	0.83136	6.26362e-06	5.20317	0.17694	1.13048	0.00369984	2.43182	-0.0268676	0.981549	0.623577	0.20511	0.0336939	1.02363	0.538942	0.268458	0.0189811	1.01324	0.7284	0.13763	-0.203808	0.868256	0.00116302	2.93441	-0.143246	0.90548	0.0150679	1.82195	-0.157959
O75694	Nuclear pore complex protein Nup155 (155 kDa nucleoporin) (Nucleoporin Nup155)	NUP155 KIAA0791	NUP155	155,199	-0.068213	0.953819	0.277831	0.556219	-0.0934329	0.93729	0.142137	0.847292	-0.349853	0.784664	1.31219e-05	4.882	0.212435	1.15864	0.00238012	2.6234	0.0890855	1.0637	0.160633	0.794166	-0.02522	0.982671	0.739823	0.130872	-0.28164	0.822655	0.00122112	2.91324	0.280648	1.21474	0.00125952	2.89979	0.157298	1.1152	0.0485284	1.314	-0.25642	0.837163	0.00267346	2.57293	0.305868	1.23616	0.000572342	3.24234	0.182518
O75717	WD repeat and HMG-box DNA-binding protein 1 (Acidic nucleoplasmic DNA-binding protein 1) (And-1)	WDHD1 AND1	WDHD1	125,967	-0.568069	0.674519	6.88987e-05	4.16179	-0.233421	0.850615	0.0535209	1.27148	-0.784846	0.580414	1.03066e-06	5.98689	-0.0109732	0.992423	0.924145	0.03426	-0.394798	0.760596	0.00240655	2.61861	0.334647	1.26107	0.0261401	1.58269	-0.216778	0.860485	0.13549	0.868094	0.557095	1.4713	0.000701818	3.15378	0.173271	1.12761	0.228134	0.64181	-0.551425	0.682346	0.000772046	3.11236	0.222448	1.16671	0.126104	0.899269	-0.161376
O75794	Cell division cycle protein 123 homolog (Protein D123) (HT-1080) (PZ32)	CDC123 C10orf7 D123	CDC123	39,135	0.0128488	1.00895	0.847709	0.0717533	0.0617149	1.04371	0.361185	0.44227	-0.235987	0.849104	0.00188989	2.72356	0.184755	1.13662	0.0110814	1.9554	0.0515129	1.03635	0.444516	0.352113	0.0488662	1.03445	0.552539	0.257637	-0.248836	0.841575	0.00592866	2.22704	0.171907	1.12655	0.04615	1.33583	0.0386642	1.02716	0.637826	0.195298	-0.297702	0.813547	0.00147187	2.83213	0.123041	1.08903	0.143811	0.842206	-0.010202
O75818	Ribonuclease P protein subunit p40 (RNaseP protein p40) (EC 3.1.26.5) (RNase P subunit 1)	RPP40 RNASEP1	RPP40	41,834	0.0782773	1.05576	0.42677	0.369807	-0.127692	0.915295	0.200605	0.697659	-0.141505	0.906573	0.158006	0.801328	0.0768147	1.05469	0.435326	0.361186	-0.146863	0.903213	0.143601	0.842842	-0.205969	0.866956	0.0966482	1.01481	-0.219782	0.858695	0.0776287	1.10998	-0.00146265	0.998987	0.990248	0.00425605	-0.22514	0.855512	0.0711845	1.14761	-0.0138135	0.990471	0.908117	0.041858	0.204506	1.15229	0.0988799	1.00489	-0.0191709
O75821	Eukaryotic translation initiation factor 3 subunit G (eIF3g) (Eukaryotic translation initiation factor 3 RNA-binding subunit) (eIF-3 RNA-binding subunit) (Eukaryotic translation initiation factor 3 subunit 4) (eIF-3-delta) (eIF3 p42) (eIF3 p44)	EIF3G EIF3S4	EIF3G	35,611	0.0169365	1.01181	0.77475	0.110839	-0.00276276	0.998087	0.96273	0.0164956	0.0185787	1.01296	0.753635	0.122839	0.142376	1.10372	0.0241495	1.61709	0.12355	1.08941	0.0470162	1.32775	-0.0196992	0.986438	0.785778	0.1047	0.00164224	1.00114	0.981906	0.00793018	0.125439	1.09084	0.0946478	1.02389	0.106614	1.0767	0.151531	0.8195	0.0213415	1.0149	0.768446	0.114387	0.145138	1.10584	0.0558455	1.25301	0.126313
O75822	Eukaryotic translation initiation factor 3 subunit J (eIF3j) (Eukaryotic translation initiation factor 3 subunit 1) (eIF-3-alpha) (eIF3 p35)	EIF3J EIF3S1 PRO0391	EIF3J	29,062	-0.178369	0.883701	0.00139992	2.8539	-0.147672	0.902706	0.00608537	2.21571	-0.0267886	0.981603	0.584382	0.233303	-0.476365	0.718786	3.60637e-09	8.44293	-0.396519	0.759689	7.1756e-08	7.14414	0.0306974	1.02151	0.608631	0.215646	0.15158	1.11079	0.0182776	1.73808	-0.297996	0.813381	6.02575e-05	4.21999	-0.21815	0.859667	0.00141699	2.84863	0.120883	1.0874	0.0538	1.26922	-0.328694	0.796257	1.84169e-05	4.73478	-0.248848
O75874	Isocitrate dehydrogenase [NADP] cytoplasmic (IDH) (EC 1.1.1.42) (Cytosolic NADP-isocitrate dehydrogenase) (IDP) (NADP(+)-specific ICDH) (Oxalosuccinate decarboxylase)	IDH1 PICD	IDH1	46,659	0.4301	1.34733	7.55262e-10	9.1219	0.115531	1.08337	0.00862062	2.06446	0.25913	1.19676	2.24756e-06	5.64829	0.493286	1.40765	6.7483e-11	10.1708	0.390804	1.31112	3.876e-09	8.41162	-0.314569	0.804091	2.54244e-06	5.59475	-0.170969	0.888246	0.00215634	2.66628	0.0631859	1.04477	0.208468	0.680961	-0.0392952	0.97313	0.428456	0.368094	0.143599	1.10466	0.00782356	2.1066	0.377755	1.29932	1.75192e-07	6.75649	0.275274
O75934	Pre-mRNA-splicing factor SPF27 (Breast carcinoma-amplified sequence 2) (DNA amplified in mammary carcinoma 1 protein) (Spliceosome-associated protein SPF 27)	BCAS2 DAM1	BCAS2	26,131	-0.00369789	0.99744	0.975619	0.0107199	0.170565	1.1255	0.16882	0.772575	0.142724	1.10399	0.246234	0.608651	0.0401503	1.02822	0.74036	0.130557	0.0886107	1.06335	0.46695	0.330729	0.174263	1.12839	0.247639	0.606181	0.146421	1.10682	0.328977	0.482834	0.0438482	1.03086	0.767558	0.114889	0.0923086	1.06607	0.53533	0.271378	-0.0278419	0.980886	0.851033	0.0700535	-0.130415	0.913569	0.38342	0.416325	-0.0819547
O75935	Dynactin subunit 3 (Dynactin complex subunit 22 kDa subunit) (p22)	DCTN3 DCTN22	DCTN3	21,119	-0.232813	0.850974	0.0580939	1.23587	-0.233702	0.85045	0.0572237	1.24242	-0.144832	0.904485	0.225624	0.646615	-0.278183	0.824629	0.0261278	1.5829	-0.24438	0.844179	0.0476438	1.32199	-0.00088861	0.999384	0.995065	0.00214847	0.0879813	1.06288	0.542201	0.26584	-0.0453699	0.969041	0.752468	0.123512	-0.0115667	0.992015	0.93584	0.0287986	0.0888699	1.06354	0.538168	0.269082	-0.0444813	0.969638	0.757151	0.120818	-0.0106781
O75937	DnaJ homolog subfamily C member 8 (Splicing protein spf31)	DNAJC8 SPF31 HSPC315 HSPC331	DNAJC8	29,842	0.014632	1.01019	0.783923	0.105727	-0.0554375	0.962303	0.304859	0.515901	0.0849861	1.06068	0.12207	0.91339	0.0712936	1.05066	0.190726	0.719591	0.0145568	1.01014	0.785002	0.105129	-0.0700694	0.952592	0.290054	0.53752	0.0703541	1.04997	0.288154	0.540376	0.0566617	1.04006	0.389943	0.408999	-7.51061e-05	0.999948	0.999082	0.000398795	0.140424	1.10223	0.0414993	1.38196	0.126731	1.09182	0.0633335	1.19837	0.0699943
O75940	Survival of motor neuron-related-splicing factor 30 (30 kDa splicing factor SMNrp) (SMN-related protein) (Survival motor neuron domain-containing protein 1)	SMNDC1 SMNR SPF30	SMNDC1	26,711	-0.128187	0.914981	0.525298	0.279594	-0.145698	0.903942	0.470968	0.327009	-0.308871	0.807273	0.134909	0.869958	0.137016	1.09963	0.49748	0.303225	-0.240405	0.846507	0.239418	0.620843	-0.0175113	0.987935	0.943231	0.0253818	-0.180684	0.882284	0.465488	0.332091	0.265203	1.20181	0.287739	0.541002	-0.112218	0.925164	0.64899	0.187762	-0.163173	0.893059	0.509304	0.293023	0.282714	1.21648	0.258002	0.588377	-0.0947071
O75947	ATP synthase subunit d, mitochondrial (ATPase subunit d) (ATP synthase peripheral stalk subunit d)	ATP5PD ATP5H My032	ATP5PD	18,491	0.276586	1.21133	0.210493	0.676763	0.317252	1.24595	0.153391	0.8142	0.551505	1.46561	0.0178597	1.74813	0.0421237	1.02963	0.845806	0.072729	0.106553	1.07665	0.623668	0.205046	0.0406654	1.02859	0.878149	0.0564319	0.274919	1.20993	0.306271	0.513894	-0.234462	0.850002	0.38122	0.418824	-0.170033	0.888823	0.523512	0.281073	0.234253	1.1763	0.381637	0.41835	-0.275128	0.826377	0.305913	0.514402	-0.210698
O75964	ATP synthase subunit g, mitochondrial (ATPase subunit g) (ATP synthase membrane subunit g)	ATP5MG ATP5L	ATP5MG	11,428	-0.236347	0.848892	0.408485	0.388823	0.242549	1.18308	0.396514	0.401742	-0.0211803	0.985426	0.940443	0.0266676	0.127359	1.09229	0.654048	0.18439	-0.181127	0.882014	0.524972	0.279864	0.478896	1.39368	0.177734	0.750231	0.215167	1.16084	0.53738	0.269718	0.363706	1.28673	0.301387	0.520875	0.05522	1.03902	0.873665	0.0586548	-0.263729	0.832932	0.450746	0.346068	-0.11519	0.923261	0.740395	0.130537	-0.423676
O76003	Glutaredoxin-3 (PKC-interacting cousin of thioredoxin) (PICOT) (PKC-theta-interacting protein) (PKCq-interacting protein) (Thioredoxin-like protein 2)	GLRX3 PICOT TXNL2 HUSSY-22	GLRX3	37,432	-0.110284	0.926406	0.0732636	1.13511	-0.126944	0.915769	0.0416891	1.37998	-0.261521	0.834208	0.000225266	3.6473	0.189973	1.14074	0.00393707	2.40483	-0.0128612	0.991125	0.827782	0.082084	-0.0166598	0.988519	0.818036	0.0872274	-0.151237	0.900478	0.0469927	1.32797	0.300257	1.23136	0.000434407	3.3621	0.0974228	1.06986	0.187897	0.72608	-0.134577	0.910937	0.0742364	1.12938	0.316916	1.24567	0.000251612	3.59927	0.114083
O76021	Ribosomal L1 domain-containing protein 1 (CATX-11) (Cellular senescence-inhibited gene protein) (Protein PBK1)	RSL1D1 CATX11 CSIG PBK1 L12	RSL1D1	54,973	0.0407123	1.02862	0.500837	0.300304	0.0389725	1.02738	0.519112	0.284739	0.1184	1.08553	0.0599204	1.22242	0.177216	1.1307	0.00730108	2.13661	0.0904296	1.06469	0.143401	0.843448	-0.00173976	0.998795	0.981153	0.00826326	0.0776881	1.05533	0.29813	0.525595	0.136504	1.09924	0.0751362	1.12415	0.0497173	1.03506	0.502068	0.299237	0.0794279	1.0566	0.287735	0.541008	0.138243	1.10056	0.0717727	1.14404	0.051457
O76031	ATP-dependent Clp protease ATP-binding subunit clpX-like, mitochondrial	CLPX	CLPX	69,224	0.0969594	1.06952	0.360099	0.443577	0.0906845	1.06488	0.391404	0.407375	-0.00642014	0.99556	0.951164	0.0217444	-0.00424374	0.997063	0.967707	0.014256	0.102847	1.07389	0.332307	0.478461	-0.00627486	0.99566	0.961019	0.0172681	-0.103379	0.93085	0.424437	0.372186	-0.101203	0.932255	0.434102	0.362408	0.00588745	1.00409	0.963424	0.0161827	-0.0971046	0.934907	0.452669	0.344219	-0.0949282	0.936319	0.462722	0.33468	0.0121623
O76071	Probable cytosolic iron-sulfur protein assembly protein CIAO1 (WD repeat-containing protein 39)	CIAO1 CIA1 WDR39	CIAO1	37,840	0.100389	1.07206	0.267529	0.572629	-0.0403721	0.972404	0.651436	0.186128	0.0326234	1.02287	0.714823	0.145802	0.0641914	1.0455	0.474299	0.323948	0.126607	1.09172	0.165755	0.780534	-0.140761	0.90704	0.206438	0.685211	-0.0677659	0.954114	0.536734	0.270241	-0.0361979	0.975222	0.74055	0.130446	0.0262181	1.01834	0.810336	0.0913346	0.0729955	1.0519	0.506101	0.295763	0.104563	1.07517	0.343654	0.463879	0.166979
O76094	Signal recognition particle subunit SRP72 (SRP72) (Signal recognition particle 72 kDa protein)	SRP72	SRP72	74,606	-0.178204	0.883803	0.0042572	2.37088	-0.0466046	0.968212	0.409427	0.387824	-0.339641	0.790238	5.19309e-06	5.28457	0.0679003	1.04819	0.233825	0.631108	-0.0687628	0.953455	0.228147	0.641785	0.131599	1.09551	0.0662175	1.17903	-0.161437	0.894134	0.02715	1.56623	0.246104	1.186	0.00164523	2.78377	0.109441	1.07881	0.12181	0.914318	-0.293037	0.816182	0.00032486	3.4883	0.114505	1.0826	0.106447	0.972866	-0.0221582
O94760	N(G),N(G)-dimethylarginine dimethylaminohydrolase 1 (DDAH-1) (Dimethylarginine dimethylaminohydrolase 1) (EC 3.5.3.18) (DDAHI) (Dimethylargininase-1)	DDAH1 DDAH	DDAH1	31,122	-0.0088529	0.993882	0.910875	0.0405411	0.125175	1.09064	0.124577	0.904563	0.176012	1.12976	0.0355233	1.44949	-0.118988	0.920833	0.143191	0.844084	-0.0556575	0.962156	0.484256	0.314925	0.134028	1.09735	0.176397	0.753508	0.184865	1.13671	0.0674782	1.17084	-0.110135	0.926501	0.263068	0.579932	-0.0468046	0.968078	0.629913	0.200719	0.0508372	1.03587	0.600913	0.221189	-0.244163	0.844305	0.0189154	1.72318	-0.180832
O94762	ATP-dependent DNA helicase Q5 (EC 3.6.4.12) (DNA helicase, RecQ-like type 5) (RecQ5) (RecQ protein-like 5)	RECQL5 RECQ5	RECQL5	108,858	-0.0157917	0.989114	0.765304	0.116166	-0.0059076	0.995914	0.910994	0.0404845	-0.107914	0.927929	0.0517564	1.28604	0.040194	1.02825	0.450138	0.346655	-0.146483	0.90345	0.0108479	1.96465	0.0098841	1.00687	0.878645	0.0561867	-0.0921221	0.938142	0.164882	0.782826	0.0559857	1.03957	0.391408	0.40737	-0.130691	0.913394	0.0541844	1.26613	-0.102006	0.931736	0.126088	0.899327	0.0461016	1.03247	0.479034	0.319634	-0.140575
O94776	Metastasis-associated protein MTA2 (Metastasis-associated 1-like 1) (MTA1-L1 protein) (p53 target protein in deacetylase complex)	MTA2 MTA1L1 PID	MTA2	75,023	-0.313132	0.804893	2.05722e-06	5.68672	-0.122427	0.918641	0.0182911	1.73776	-0.298228	0.813251	4.03162e-06	5.39452	-0.0843262	0.943225	0.0920675	1.03589	-0.289153	0.818382	6.10993e-06	5.21396	0.190704	1.14132	0.00384083	2.41558	0.0149035	1.01038	0.801115	0.0963053	0.228805	1.17186	0.000842216	3.07458	0.0239785	1.01676	0.685641	0.163903	-0.175801	0.885276	0.0068696	2.16307	0.0381013	1.02676	0.521415	0.282817	-0.166726
O94808	Glutamine--fructose-6-phosphate aminotransferase [isomerizing] 2 (EC 2.6.1.16) (D-fructose-6-phosphate amidotransferase 2) (Glutamine:fructose-6-phosphate amidotransferase 2) (GFAT 2) (GFAT2) (Hexosephosphate aminotransferase 2)	GFPT2	GFPT2	76,931	-0.285482	0.820468	0.138268	0.859278	-0.233348	0.850658	0.221484	0.654658	-0.0861852	0.94201	0.64622	0.189619	-1.26241	0.416846	1.19372e-06	5.9231	-0.320905	0.800567	0.0980092	1.00873	0.0521335	1.0368	0.820293	0.0860307	0.199297	1.14814	0.389329	0.409684	-0.976933	0.508059	0.000334306	3.47586	-0.0354233	0.975745	0.877288	0.056858	0.147163	1.10739	0.52324	0.281299	-1.02907	0.490027	0.000195115	3.70971	-0.0875568
O94855	Protein transport protein Sec24D (SEC24-related protein D)	SEC24D KIAA0755	SEC24D	113,010	0.124672	1.09026	0.300875	0.521614	0.097114	1.06963	0.417857	0.378972	0.0604248	1.04277	0.612403	0.212963	0.0101943	1.00709	0.931667	0.0307393	-0.0662374	0.955126	0.57888	0.237412	-0.0275585	0.981079	0.849937	0.070613	-0.0642476	0.956444	0.659794	0.180592	-0.114478	0.923716	0.435257	0.361254	-0.19091	0.876053	0.19916	0.700797	-0.0366892	0.97489	0.801199	0.0962595	-0.0869197	0.941531	0.55229	0.257833	-0.163351
O94874	E3 UFM1-protein ligase 1 (EC 2.3.2.-) (E3 UFM1-protein transferase 1) (Multiple alpha-helix protein located at ER) (Novel LZAP-binding protein) (Regulator of C53/LZAP and DDRGK1)	UFL1 KIAA0776 MAXER NLBP RCAD	UFL1	89,595	0.0805959	1.05745	0.407503	0.389869	0.144577	1.10541	0.144671	0.839618	0.121825	1.08811	0.215528	0.666496	0.128844	1.09342	0.191237	0.718429	0.125563	1.09093	0.202308	0.693988	0.0639809	1.04535	0.589482	0.229529	0.0412295	1.02899	0.727494	0.138171	0.0482479	1.03401	0.683605	0.165195	0.0449674	1.03166	0.703988	0.152435	-0.0227514	0.984354	0.847354	0.0719351	-0.015733	0.989154	0.894077	0.048625	-0.0190135
O94903	Pyridoxal phosphate homeostasis protein (PLP homeostasis protein) (Proline synthase co-transcribed bacterial homolog protein) (Pyridoxal phosphate-binding protein)	PLPBP PROSC	PLPBP	30,344	-0.0566059	0.961524	0.518605	0.285164	0.147125	1.10736	0.103074	0.986851	0.264947	1.20159	0.00593982	2.22623	-0.343462	0.788148	0.000718527	3.14356	-0.0333702	0.977135	0.702576	0.153307	0.203731	1.15167	0.0677187	1.16929	0.321553	1.24967	0.00632687	2.19881	-0.286856	0.819686	0.0131809	1.88005	0.0232357	1.01624	0.827927	0.0820079	0.117822	1.0851	0.277311	0.557033	-0.490587	0.711736	0.000152265	3.8174	-0.180495
O94906	Pre-mRNA-processing factor 6 (Androgen receptor N-terminal domain-transactivating protein 1) (ANT-1) (PRP6 homolog) (U5 snRNP-associated 102 kDa protein) (U5-102 kDa protein)	PRPF6 C20orf14	PRPF6	106,925	-0.11266	0.924881	0.218875	0.659805	3.78952e-05	1.00003	0.999664	0.000146126	0.0622322	1.04408	0.491294	0.308659	-0.265748	0.831767	0.00714301	2.14612	-0.279668	0.82378	0.00500549	2.30055	0.112698	1.08125	0.312221	0.505538	0.174892	1.12888	0.123267	0.909155	-0.153088	0.899323	0.174361	0.758552	-0.167009	0.890688	0.140076	0.853637	0.0621943	1.04405	0.573614	0.24138	-0.265786	0.831746	0.0238211	1.62304	-0.279706
O94925	Glutaminase kidney isoform, mitochondrial (GLS) (EC 3.5.1.2) (K-glutaminase) (L-glutamine amidohydrolase) [Cleaved into: Glutaminase kidney isoform, mitochondrial 68 kDa chain; Glutaminase kidney isoform, mitochondrial 65 kDa chain]	GLS GLS1 KIAA0838	GLS	73,461	0.476558	1.39142	0.000640971	3.19316	-0.109861	0.926677	0.363261	0.439781	-0.430528	0.74199	0.00159573	2.79704	0.882596	1.84369	3.15489e-07	6.50102	0.525736	1.43967	0.000241548	3.617	-0.58642	0.665994	0.000612949	3.21258	-0.907086	0.533261	3.89772e-06	5.40919	0.406038	1.32504	0.0108383	1.96504	0.049178	1.03468	0.737375	0.132311	-0.320667	0.8007	0.0382961	1.41685	0.992457	1.98957	1.10739e-06	5.9557	0.635598
O94973	AP-2 complex subunit alpha-2 (100 kDa coated vesicle protein C) (Adaptor protein complex AP-2 subunit alpha-2) (Adaptor-related protein complex 2 subunit alpha-2) (Alpha-adaptin C) (Alpha2-adaptin) (Clathrin assembly protein complex 2 alpha-C large chain) (Huntingtin yeast partner J) (Huntingtin-interacting protein 9) (HIP-9) (Huntingtin-interacting protein J) (Plasma membrane adaptor HA2/AP2 ada…	AP2A2 ADTAB CLAPA2 HIP9 HYPJ KIAA0899	AP2A2	103,960	0.112486	1.08109	0.228963	0.640236	0.270445	1.20618	0.00731542	2.13576	0.246495	1.18632	0.0131705	1.8804	0.398742	1.31836	0.000273721	3.56269	0.44097	1.35752	9.2455e-05	4.03407	0.157959	1.11571	0.17016	0.769142	0.134009	1.09734	0.241456	0.617163	0.286257	1.21947	0.0179008	1.74713	0.328484	1.25569	0.00773341	2.11163	-0.0239499	0.983536	0.831393	0.0801938	0.128297	1.093	0.261427	0.58265	0.170525
O94992	Protein HEXIM1 (Cardiac lineage protein 1) (Estrogen down-regulated gene 1 protein) (Hexamethylene bis-acetamide-inducible protein 1) (Menage a quatre protein 1)	HEXIM1 CLP1 EDG1 HIS1 MAQ1	HEXIM1	40,623	0.279752	1.21399	0.0129724	1.88698	0.0336164	1.02357	0.746635	0.126892	0.123725	1.08954	0.241974	0.616231	0.020999	1.01466	0.839932	0.0757557	-0.0387309	0.973511	0.709838	0.14884	-0.246136	0.843152	0.0642144	1.19237	-0.156027	0.897493	0.228765	0.64061	-0.258753	0.83581	0.0527153	1.27806	-0.318483	0.801912	0.0196952	1.70564	0.0901091	1.06445	0.481683	0.317238	-0.0126174	0.991292	0.921035	0.0357237	-0.0723473
O95071	E3 ubiquitin-protein ligase UBR5 (EC 2.3.2.26) (E3 ubiquitin-protein ligase, HECT domain-containing 1) (HECT-type E3 ubiquitin transferase UBR5) (Hyperplastic discs protein homolog) (hHYD) (Progestin-induced protein)	UBR5 EDD EDD1 HYD KIAA0896	UBR5	309,352	-0.0462502	0.96845	0.699965	0.154924	-0.114868	0.923467	0.343129	0.464543	-0.142616	0.905875	0.242022	0.616145	0.0711842	1.05058	0.554114	0.256401	0.0149451	1.01041	0.900732	0.0454043	-0.0686173	0.953551	0.640922	0.193195	-0.0963655	0.935386	0.513574	0.289397	0.117434	1.0848	0.427166	0.369403	0.0611954	1.04333	0.677267	0.16924	-0.0277482	0.98095	0.850055	0.0705529	0.186052	1.13765	0.213732	0.670129	0.129813
O95163	Elongator complex protein 1 (ELP1) (IkappaB kinase complex-associated protein) (IKK complex-associated protein) (p150)	ELP1 IKAP IKBKAP	ELP1	150,254	-0.236339	0.848897	0.0472717	1.3254	-0.0856695	0.942347	0.452575	0.344309	-0.17784	0.884025	0.127397	0.894839	-0.0240669	0.983456	0.831787	0.0799878	-0.0196325	0.986484	0.862411	0.0642856	0.15067	1.11008	0.284335	0.54617	0.0584986	1.04138	0.673865	0.171427	0.212272	1.15851	0.136801	0.863912	0.216707	1.16208	0.129226	0.888652	-0.0921709	0.93811	0.508671	0.293563	0.0616025	1.04362	0.657714	0.181963	0.066037
O95218	Zinc finger Ran-binding domain-containing protein 2 (Zinc finger protein 265) (Zinc finger, splicing)	ZRANB2 ZIS ZNF265	ZRANB2	37,404	0.077282	1.05503	0.354952	0.44983	0.085553	1.06109	0.306985	0.512883	0.161782	1.11867	0.0612881	1.21262	0.113602	1.08193	0.179168	0.74674	0.172055	1.12666	0.0477662	1.32088	0.00827101	1.00575	0.934877	0.0292457	0.0845004	1.06032	0.407881	0.389466	0.0363204	1.02549	0.720147	0.142579	0.0947727	1.0679	0.354346	0.450573	0.0762294	1.05426	0.454571	0.342398	0.0280493	1.01963	0.781888	0.106855	0.0865017
O95302	Peptidyl-prolyl cis-trans isomerase FKBP9 (PPIase FKBP9) (EC 5.2.1.8) (63 kDa FK506-binding protein) (63 kDa FKBP) (FKBP-63) (FK506-binding protein 9) (FKBP-9) (Rotamase)	FKBP9 FKBP60 FKBP63	FKBP9	63,084	0.402369	1.32168	0.00616285	2.21022	-0.126724	0.915909	0.346773	0.459954	0.165244	1.12136	0.223407	0.650903	-0.239731	0.846903	0.0832645	1.07954	-0.00625458	0.995674	0.962543	0.0165797	-0.529093	0.69299	0.00368496	2.43357	-0.237125	0.848434	0.156505	0.805473	-0.6421	0.640779	0.000719914	3.14272	-0.408624	0.753342	0.0195802	1.70818	0.291968	1.22431	0.0848772	1.07121	-0.113007	0.924659	0.491035	0.308887	0.120469
O95336	6-phosphogluconolactonase (6PGL) (EC 3.1.1.31)	PGLS	PGLS	27,547	0.293862	1.22592	0.000143426	3.84337	0.182208	1.13462	0.00884067	2.05351	0.335033	1.26141	3.16876e-05	4.49911	0.360377	1.28376	1.27563e-05	4.89427	0.421862	1.33966	1.51888e-06	5.81848	-0.111654	0.925526	0.162369	0.789497	0.0411704	1.02895	0.598656	0.222822	0.0665146	1.04718	0.397769	0.400369	0.128	1.09278	0.111875	0.951266	0.152825	1.11174	0.0609271	1.21519	0.178169	1.13145	0.0313278	1.50407	0.239654
O95340	Bifunctional 3'-phosphoadenosine 5'-phosphosulfate synthase 2 (PAPS synthase 2) (PAPSS 2) (Sulfurylase kinase 2) (SK 2) (SK2) [Includes: Sulfate adenylyltransferase (EC 2.7.7.4) (ATP-sulfurylase) (Sulfate adenylate transferase) (SAT); Adenylyl-sulfate kinase (EC 2.7.1.25) (3'-phosphoadenosine-5'-phosphosulfate synthase) (APS kinase) (Adenosine-5'-phosphosulfate 3'-phosphotransferase) (Adenylylsul…	PAPSS2 ATPSK2	PAPSS2	69,501	-0.165333	0.891723	0.0365049	1.43765	-0.0997143	0.933218	0.191627	0.717543	-0.0800672	0.946014	0.290763	0.536461	-0.0827777	0.944238	0.275197	0.560356	-0.0832625	0.943921	0.272479	0.564667	0.0656187	1.04653	0.476191	0.322219	0.0852658	1.06088	0.35667	0.447734	0.0825553	1.05889	0.371845	0.429638	0.0820705	1.05854	0.374604	0.426427	0.0196471	1.01371	0.830103	0.0808681	0.0169366	1.01181	0.853233	0.0689326	0.0164518
O95347	Structural maintenance of chromosomes protein 2 (SMC protein 2) (SMC-2) (Chromosome-associated protein E) (hCAP-E) (XCAP-E homolog)	SMC2 CAPE SMC2L1 PRO0324	SMC2	135,656	-0.442488	0.735864	2.70078e-06	5.56851	-0.195857	0.873054	0.0098325	2.00734	-0.630729	0.64585	1.23327e-08	7.90894	-0.118348	0.921242	0.100258	0.998881	-0.392402	0.76186	1.3371e-05	4.87383	0.246631	1.18643	0.00821748	2.08526	-0.188241	0.877675	0.0367308	1.43497	0.32414	1.25192	0.0009835	3.00723	0.0500864	1.03533	0.55827	0.253156	-0.434872	0.73976	4.58065e-05	4.33907	0.0775088	1.05519	0.367833	0.434349	-0.196544
O95372	Acyl-protein thioesterase 2 (APT-2) (EC 3.1.2.-) (Lysophospholipase II) (LPL-II) (LysoPLA II)	LYPLA2 APT2	LYPLA2	24,737	-0.0435121	0.97029	0.653505	0.184751	0.0778603	1.05545	0.424403	0.372222	0.00448673	1.00311	0.962987	0.0163794	-0.0746224	0.949591	0.443625	0.352984	-0.0548011	0.962727	0.572399	0.242301	0.121372	1.08777	0.31167	0.506305	0.0479988	1.03383	0.685836	0.16378	-0.0311103	0.978667	0.792937	0.100761	-0.011289	0.992206	0.924056	0.0343016	-0.0733736	0.950413	0.537459	0.269654	-0.152483	0.899701	0.207013	0.684001	-0.132661
O95373	Importin-7 (Imp7) (Ran-binding protein 7) (RanBP7)	IPO7 RANBP7	IPO7	119,517	-0.241013	0.846151	2.19534e-05	4.6585	-0.0863936	0.941874	0.0629301	1.20114	-0.320132	0.800997	4.53106e-07	6.3438	0.158071	1.11579	0.00176687	2.7528	-0.0987352	0.933851	0.0358055	1.44605	0.15462	1.11313	0.0092877	2.03209	-0.0791185	0.946636	0.156493	0.805506	0.399085	1.31867	3.47945e-07	6.45849	0.142278	1.10365	0.0154139	1.81209	-0.233738	0.850428	0.000307468	3.5122	0.244465	1.18465	0.00019279	3.71492	-0.0123416
O95433	Activator of 90 kDa heat shock protein ATPase homolog 1 (AHA1) (p38)	AHSA1 C14orf3 HSPC322	AHSA1	38,274	-0.160013	0.895017	0.00724072	2.14022	-0.0852795	0.942602	0.126905	0.89652	-0.273461	0.827333	5.29161e-05	4.27641	0.122753	1.08881	0.0328184	1.48388	-0.0774718	0.947717	0.163431	0.786667	0.0747339	1.05317	0.267946	0.571953	-0.113447	0.924377	0.0990252	1.00425	0.282766	1.21653	0.000335962	3.47371	0.0825416	1.05888	0.222666	0.652347	-0.188181	0.877712	0.00945098	2.02452	0.208032	1.15511	0.00477179	2.32132	0.00780768
O95456	Proteasome assembly chaperone 1 (PAC-1) (Chromosome 21 leucine-rich protein) (C21-LRP) (Down syndrome critical region protein 2)	PSMG1 C21LRP DSCR2 PAC1	PSMG1	32,854	-0.252622	0.839369	0.0133141	1.87569	-0.117691	0.921662	0.220538	0.656517	-0.361662	0.778267	0.000910737	3.04061	-0.0156587	0.989205	0.868084	0.0614383	-0.118879	0.920903	0.216087	0.665371	0.134932	1.09804	0.250362	0.601432	-0.10904	0.927205	0.350178	0.455711	0.236964	1.17851	0.0506538	1.29539	0.133744	1.09714	0.25442	0.594448	-0.243971	0.844418	0.044777	1.34894	0.102032	1.07328	0.38136	0.418665	-0.00118796
O95486	Protein transport protein Sec24A (SEC24-related protein A)	SEC24A	SEC24A	119,749	-0.205813	0.86705	0.430852	0.365672	0.211189	1.15764	0.419103	0.377679	-0.0227126	0.98438	0.930186	0.0314302	0.273382	1.20864	0.298245	0.525427	-0.121909	0.918971	0.639083	0.194443	0.417002	1.33515	0.198428	0.702396	0.1831	1.13532	0.565748	0.247377	0.479195	1.39397	0.142017	0.84766	0.0839042	1.05988	0.791741	0.101417	-0.233902	0.850332	0.464318	0.333184	0.0621935	1.04405	0.844763	0.0732649	-0.333097
O95721	Synaptosomal-associated protein 29 (SNAP-29) (Soluble 29 kDa NSF attachment protein) (Vesicle-membrane fusion protein SNAP-29)	SNAP29	SNAP29	28,970	0.0526947	1.0372	0.678051	0.168738	-0.155553	0.897788	0.227988	0.642088	0.126951	1.09198	0.322236	0.491826	0.0155389	1.01083	0.902377	0.0446119	-0.240723	0.846321	0.0685737	1.16384	-0.208248	0.865588	0.189115	0.723274	0.0742565	1.05282	0.633147	0.198496	-0.0371558	0.974574	0.810837	0.0910662	-0.293418	0.815967	0.0697986	1.15615	0.282505	1.2163	0.0799747	1.09705	0.171092	1.12591	0.277276	0.557087	-0.0851701
O95747	Serine/threonine-protein kinase OSR1 (EC 2.7.11.1) (Oxidative stress-responsive 1 protein)	OXSR1 KIAA1101 OSR1	OXSR1	58,022	0.0500697	1.03531	0.363401	0.439613	0.0951687	1.06819	0.0922807	1.03489	0.136069	1.09891	0.0199703	1.69962	-0.0342664	0.976528	0.531653	0.274372	0.0040688	1.00282	0.940505	0.0266388	0.0450989	1.03175	0.501811	0.29946	0.0859991	1.06142	0.206881	0.684279	-0.0843361	0.943218	0.215451	0.666651	-0.046001	0.968618	0.493394	0.306806	0.0409002	1.02876	0.542042	0.265967	-0.129435	0.914189	0.0636247	1.19637	-0.0910999
O95757	Heat shock 70 kDa protein 4L (Heat shock 70-related protein APG-1) (Osmotic stress protein 94)	HSPA4L APG1 OSP94	HSPA4L	94,512	0.0699251	1.04966	0.72234	0.141258	0.435001	1.35191	0.0364047	1.43884	0.183234	1.13543	0.356231	0.448268	0.290785	1.22331	0.149521	0.825298	0.0916597	1.0656	0.641755	0.192631	0.365076	1.28795	0.14008	0.853625	0.113309	1.08171	0.638663	0.194728	0.22086	1.16543	0.363741	0.439208	0.0217346	1.01518	0.928037	0.0324347	-0.251767	0.839867	0.301985	0.520015	-0.144216	0.904871	0.550756	0.25904	-0.343341
O95758	Polypyrimidine tract-binding protein 3 (Regulator of differentiation 1) (Rod1)	PTBP3 ROD1	PTBP3	59,690	0.0219982	1.01536	0.884655	0.053226	0.0607614	1.04302	0.689161	0.16168	0.0683671	1.04853	0.65284	0.185193	-0.121162	0.919447	0.427852	0.368707	-0.0185204	0.987245	0.902784	0.044416	0.0387632	1.02723	0.834713	0.078463	0.0463688	1.03266	0.802941	0.0953164	-0.14316	0.905533	0.444072	0.352546	-0.0405186	0.972305	0.827352	0.0823099	0.00760562	1.00529	0.967326	0.0144273	-0.181924	0.881527	0.332941	0.477633	-0.0792818
O95777	U6 snRNA-associated Sm-like protein LSm8	LSM8	LSM8	10,403	0.137423	1.09994	0.017502	1.75691	0.228152	1.17133	0.000346586	3.46019	0.213792	1.15973	0.000653526	3.18474	0.360897	1.28422	1.26566e-06	5.89768	0.368589	1.29109	9.34717e-07	6.02932	0.0907287	1.06491	0.178109	0.749315	0.0763692	1.05436	0.253891	0.595352	0.223474	1.16754	0.00259103	2.58653	0.231166	1.17378	0.00196906	2.70574	-0.0143596	0.990096	0.827438	0.0822648	0.132745	1.09638	0.0545218	1.26343	0.140437
O95782	AP-2 complex subunit alpha-1 (100 kDa coated vesicle protein A) (Adaptor protein complex AP-2 subunit alpha-1) (Adaptor-related protein complex 2 subunit alpha-1) (Alpha-adaptin A) (Alpha1-adaptin) (Clathrin assembly protein complex 2 alpha-A large chain) (Plasma membrane adaptor HA2/AP2 adaptin alpha A subunit)	AP2A1 ADTAA CLAPA1	AP2A1	107,546	0.0661359	1.04691	0.266859	0.573718	-0.064636	0.956187	0.277528	0.556693	0.106542	1.07664	0.0806078	1.09362	-0.104928	0.929851	0.0849589	1.07079	0.00776876	1.0054	0.894619	0.048362	-0.130772	0.913343	0.0799974	1.09692	0.0404065	1.0284	0.575196	0.240184	-0.171064	0.888187	0.0255386	1.5928	-0.0583672	0.96035	0.420204	0.37654	0.171178	1.12598	0.0254521	1.59428	-0.0402925	0.972458	0.576266	0.239377	0.0724048
O95801	Tetratricopeptide repeat protein 4 (TPR repeat protein 4)	TTC4 My044	TTC4	44,679	-0.255853	0.837492	0.0351926	1.45355	-0.0523865	0.96434	0.648779	0.187903	-0.128538	0.914758	0.269925	0.568757	-0.085053	0.94275	0.461532	0.335799	-0.0654454	0.95565	0.569924	0.244183	0.203466	1.15146	0.158027	0.801268	0.127315	1.09226	0.369753	0.432089	0.1708	1.12568	0.232568	0.63345	0.190407	1.14109	0.185116	0.732556	-0.0761514	0.948585	0.589193	0.229742	-0.0326665	0.977612	0.81627	0.0881662	-0.0130589
O95816	BAG family molecular chaperone regulator 2 (BAG-2) (Bcl-2-associated athanogene 2)	BAG2	BAG2	23,772	0.106522	1.07663	0.0752533	1.12347	-0.136878	0.909485	0.0256121	1.59156	0.00618842	1.0043	0.914298	0.0389123	-0.0564037	0.961658	0.332364	0.478386	-0.0788316	0.946824	0.180239	0.744152	-0.243399	0.844753	0.00223997	2.64976	-0.100333	0.932817	0.164498	0.783838	-0.162926	0.893212	0.0295318	1.52971	-0.185353	0.879434	0.0148173	1.82923	0.143066	1.10425	0.0528692	1.2768	0.0804738	1.05737	0.260777	0.583731	0.0580459
O95817	BAG family molecular chaperone regulator 3 (BAG-3) (Bcl-2-associated athanogene 3) (Bcl-2-binding protein Bis) (Docking protein CAIR-1)	BAG3 BIS	BAG3	61,595	0.0328312	1.02302	0.630843	0.200079	-0.0544581	0.962956	0.427743	0.368818	-0.186336	0.878835	0.0117819	1.92879	0.178172	1.13145	0.0153758	1.81316	0.119647	1.08647	0.0904624	1.04353	-0.0872893	0.94129	0.302006	0.519985	-0.219167	0.859061	0.0149933	1.8241	0.145341	1.10599	0.0929408	1.03179	0.086816	1.06202	0.304565	0.51632	-0.131878	0.912643	0.125086	0.902793	0.23263	1.17497	0.0104634	1.98033	0.174105
O95831	Apoptosis-inducing factor 1, mitochondrial (EC 1.1.1.-) (Programmed cell death protein 8)	AIFM1 AIF PDCD8	AIFM1	66,901	0.218195	1.16328	0.00671002	2.17328	0.207819	1.15494	0.00926534	2.03314	0.0565515	1.03998	0.442694	0.353896	0.350684	1.27517	9.41937e-05	4.02598	0.3402	1.26593	0.000131955	3.87957	-0.0103754	0.992834	0.907779	0.0420197	-0.161643	0.894006	0.0824779	1.08366	0.13249	1.09618	0.149664	0.824884	0.122005	1.08825	0.182899	0.737788	-0.151268	0.900459	0.102588	0.988905	0.142865	1.1041	0.121821	0.914279	0.132381
O95861	3'(2'),5'-bisphosphate nucleotidase 1 (EC 3.1.3.7) (Bisphosphate 3'-nucleotidase 1) (PAP-inositol 1,4-phosphatase) (PIP)	BPNT1	BPNT1	33,392	0.0393714	1.02767	0.59135	0.228156	-0.0356341	0.975603	0.626797	0.202873	-0.0226354	0.984433	0.757003	0.120902	0.125976	1.09125	0.0961129	1.01722	-0.00559001	0.996133	0.93902	0.0273249	-0.0750055	0.949338	0.406059	0.391411	-0.0620067	0.957931	0.49098	0.308937	0.086605	1.06187	0.338774	0.47009	-0.0449614	0.969316	0.616484	0.210078	0.0129988	1.00905	0.884537	0.0532841	0.161611	1.11854	0.0823298	1.08444	0.0300441
O95881	Thioredoxin domain-containing protein 12 (EC 1.8.4.2) (Endoplasmic reticulum resident protein 18) (ER protein 18) (ERp18) (Endoplasmic reticulum resident protein 19) (ER protein 19) (ERp19) (Thioredoxin-like protein p19) (hTLP19)	TXNDC12 TLP19 UNQ713/PRO1376	TXNDC12	19,206	0.00937835	1.00652	0.867669	0.0616459	-0.0436249	0.970214	0.441586	0.354985	0.108931	1.07843	0.063966	1.19405	-0.23044	0.852375	0.000493581	3.30664	-0.101252	0.932223	0.0833495	1.0791	-0.0530032	0.963928	0.445183	0.351462	0.0995526	1.07144	0.158994	0.79862	-0.239819	0.846852	0.00211952	2.67376	-0.110631	0.926183	0.119623	0.922186	0.152556	1.11154	0.0364246	1.43861	-0.186816	0.878543	0.0124417	1.90512	-0.0576274
O96019	Actin-like protein 6A (53 kDa BRG1-associated factor A) (Actin-related protein Baf53a) (ArpNbeta) (BRG1-associated factor 53A) (BAF53A) (INO80 complex subunit K)	ACTL6A BAF53 BAF53A INO80K	ACTL6A	47,461	0.0242172	1.01693	0.791281	0.10167	-0.0203133	0.986019	0.824279	0.0839257	-0.120106	0.92012	0.198357	0.702553	0.380227	1.30155	0.000424694	3.37192	0.290247	1.22285	0.00432633	2.36388	-0.0445305	0.969605	0.691445	0.160242	-0.144324	0.904803	0.206612	0.684844	0.356009	1.27988	0.00427906	2.36865	0.26603	1.20249	0.0258799	1.58704	-0.0997932	0.933167	0.37754	0.423037	0.40054	1.32	0.00168653	2.77301	0.310561
P00338	L-lactate dehydrogenase A chain (LDH-A) (EC 1.1.1.27) (Cell proliferation-inducing gene 19 protein) (LDH muscle subunit) (LDH-M) (Renal carcinoma antigen NY-REN-59)	LDHA PIG19	LDHA	36,689	-0.252484	0.83945	1.8041e-05	4.74374	-0.216609	0.860586	0.000110797	3.95547	-0.411523	0.751829	1.4461e-08	7.8398	0.137043	1.09965	0.00661067	2.17975	-0.20452	0.867827	0.000206424	3.68524	0.0358751	1.02518	0.524807	0.28	-0.159039	0.895621	0.00944381	2.02485	0.389527	1.30996	7.84192e-07	6.10558	0.0479637	1.0338	0.397071	0.401132	-0.194914	0.873625	0.00215513	2.66653	0.353652	1.27779	3.08055e-06	5.51137	0.0120885
P00352	Retinal dehydrogenase 1 (RALDH 1) (RalDH1) (EC 1.2.1.-) (EC 1.2.1.36) (ALDH-E1) (ALHDII) (Aldehyde dehydrogenase family 1 member A1) (Aldehyde dehydrogenase, cytosolic)	ALDH1A1 ALDC ALDH1 PUMB1	ALDH1A1	54,862	1.95791	3.88498	4.7882e-13	12.3198	-0.30171	0.81129	0.0208774	1.68032	0.64974	1.56889	2.71496e-05	4.56624	1.90898	3.75545	7.69245e-13	12.1139	1.54209	2.91215	3.89142e-11	10.4099	-2.25962	0.208827	1.45349e-12	11.8376	-1.30817	0.403833	2.15073e-08	7.66741	-0.0489238	0.966657	0.74342	0.128766	-0.415823	0.749592	0.01052	1.97798	0.951451	1.93382	2.62768e-06	5.58043	2.21069	4.62898	2.18285e-12	11.661	1.8438
P00367	Glutamate dehydrogenase 1, mitochondrial (GDH 1) (EC 1.4.1.3)	GLUD1 GLUD	GLUD1	61,398	0.100423	1.07209	0.168125	0.774369	0.152823	1.11174	0.0416518	1.38037	0.176677	1.13028	0.0204849	1.68857	-0.00785397	0.994571	0.912073	0.0399704	0.188009	1.13919	0.0144456	1.84027	0.0524006	1.03699	0.54924	0.260238	0.0762548	1.05428	0.385844	0.413588	-0.108277	0.927696	0.222544	0.652585	0.087586	1.06259	0.320678	0.49393	0.0238542	1.01667	0.784376	0.105476	-0.160677	0.894605	0.0764139	1.11683	0.0351855
P00390	Glutathione reductase, mitochondrial (GR) (GRase) (EC 1.8.1.7)	GSR GLUR GRD1	GSR	56,257	0.364118	1.28709	1.01072e-06	5.99537	-0.0532657	0.963752	0.324411	0.488904	0.181341	1.13394	0.0025786	2.58862	0.446248	1.36249	4.60575e-08	7.3367	0.360578	1.28394	1.16313e-06	5.93437	-0.417384	0.748781	2.57795e-06	5.58872	-0.182777	0.881005	0.0102999	1.98717	0.0821294	1.05858	0.21797	0.661604	-0.00354019	0.997549	0.956824	0.0191679	0.234607	1.17659	0.00164402	2.78409	0.499513	1.41374	1.87432e-07	6.72716	0.413844
P00403	Cytochrome c oxidase subunit 2 (Cytochrome c oxidase polypeptide II)	MT-CO2 COII COX2 COXII MTCO2	MT-CO2	25,565	-0.340955	0.789519	0.364039	0.438853	0.764687	1.699	0.0502207	1.29912	0.172895	1.12732	0.642742	0.191963	0.0271853	1.01902	0.941702	0.0260865	0.0459879	1.03239	0.901556	0.0450074	1.10564	2.15194	0.0231083	1.63623	0.51385	1.42786	0.266524	0.574263	0.36814	1.29069	0.422513	0.37416	0.386942	1.30762	0.399607	0.398367	-0.591791	0.663519	0.202911	0.692694	-0.737501	0.599777	0.116493	0.9337	-0.718699
P00441	Superoxide dismutase [Cu-Zn] (EC 1.15.1.1) (Superoxide dismutase 1) (hSod1)	SOD1	SOD1	15,936	0.153189	1.11203	0.0109909	1.95897	0.0558773	1.03949	0.319062	0.496125	0.226893	1.17031	0.00049147	3.3085	0.0829899	1.05921	0.144717	0.839481	0.122771	1.08882	0.0361773	1.44156	-0.0973121	0.934773	0.161702	0.791285	0.0737034	1.05241	0.284182	0.546403	-0.0701995	0.952506	0.307059	0.512778	-0.0304186	0.979136	0.654603	0.184022	0.171016	1.12585	0.0188937	1.72368	0.0271126	1.01897	0.689921	0.161201	0.0668935
P00491	Purine nucleoside phosphorylase (PNP) (EC 2.4.2.1) (Inosine phosphorylase) (Inosine-guanosine phosphorylase)	PNP NP	PNP	32,118	-0.0727566	0.950819	0.133867	0.873328	0.0152528	1.01063	0.746696	0.126856	-0.0399014	0.972721	0.401719	0.396077	0.0896375	1.0641	0.0685517	1.16398	0.0414049	1.02912	0.384539	0.41506	0.0880094	1.0629	0.138463	0.858666	0.0328552	1.02303	0.571039	0.243334	0.162394	1.11914	0.00992863	2.00311	0.114161	1.08235	0.0590373	1.22887	-0.0551542	0.962492	0.345102	0.462052	0.0743847	1.05291	0.206972	0.684088	0.0261521
P00492	Hypoxanthine-guanine phosphoribosyltransferase (HGPRT) (HGPRTase) (EC 2.4.2.8)	HPRT1 HPRT	HPRT1	24,579	-0.184589	0.8799	0.0041929	2.37749	-0.0431554	0.97053	0.459177	0.33802	-0.0982033	0.934196	0.101266	0.994535	-0.0178473	0.987705	0.758169	0.120234	-0.00724454	0.994991	0.900443	0.0455438	0.141433	1.103	0.0569554	1.24447	0.0863853	1.06171	0.231616	0.635232	0.166741	1.12252	0.0272611	1.56446	0.177344	1.1308	0.0197605	1.7042	-0.0550479	0.962563	0.44102	0.355542	0.0253081	1.0177	0.721593	0.141708	0.0359109
P00505	Aspartate aminotransferase, mitochondrial (mAspAT) (EC 2.6.1.1) (EC 2.6.1.7) (Fatty acid-binding protein) (FABP-1) (Glutamate oxaloacetate transaminase 2) (Kynurenine aminotransferase 4) (Kynurenine aminotransferase IV) (Kynurenine--oxoglutarate transaminase 4) (Kynurenine--oxoglutarate transaminase IV) (Plasma membrane-associated fatty acid-binding protein) (FABPpm) (Transaminase A)	GOT2	GOT2	47,518	0.164311	1.12063	0.0180707	1.74302	0.146288	1.10672	0.0328541	1.48341	0.210712	1.15726	0.00354976	2.4498	0.0804861	1.05737	0.22183	0.653981	0.253541	1.19213	0.000744546	3.12811	-0.0180223	0.987586	0.820033	0.0861687	0.046401	1.03269	0.559495	0.252204	-0.0838245	0.943553	0.296376	0.528157	0.0892304	1.0638	0.26718	0.573196	0.0644233	1.04567	0.419631	0.377132	-0.0658021	0.955414	0.409915	0.387306	0.107253
P00558	Phosphoglycerate kinase 1 (EC 2.7.2.3) (Cell migration-inducing gene 10 protein) (Primer recognition protein 2) (PRP 2)	PGK1 PGKA MIG10 OK/SW-cl.110	PGK1	44,615	0.184028	1.13605	0.000644569	3.19073	0.0472116	1.03327	0.313114	0.504297	0.194376	1.14423	0.000378705	3.4217	0.298845	1.23016	2.14387e-06	5.6688	0.306838	1.23699	1.47812e-06	5.83029	-0.136816	0.909524	0.0236498	1.62617	0.0103483	1.0072	0.854952	0.0680582	0.114817	1.08284	0.0531471	1.27452	0.12281	1.08885	0.0398559	1.39951	0.147164	1.10739	0.0158835	1.79905	0.251634	1.19055	0.000214482	3.66861	0.259626
P00568	Adenylate kinase isoenzyme 1 (AK 1) (EC 2.7.4.3) (EC 2.7.4.6) (ATP-AMP transphosphorylase 1) (ATP:AMP phosphotransferase) (Adenylate monophosphate kinase) (Myokinase)	AK1	AK1	21,635	0.247001	1.18674	2.84815e-05	4.54544	-0.0402032	0.972518	0.391803	0.406932	0.0223121	1.01559	0.632421	0.198994	0.248513	1.18798	2.64299e-05	4.5779	0.133349	1.09684	0.00875986	2.0575	-0.287204	0.819489	5.30484e-05	4.27533	-0.224689	0.85578	0.000706747	3.15074	0.0015121	1.00105	0.978823	0.00929576	-0.113652	0.924246	0.0568886	1.24498	0.0625153	1.04428	0.2796	0.553463	0.288716	1.22155	4.98727e-05	4.30214	0.173552
P02452	Collagen alpha-1(I) chain (Alpha-1 type I collagen)	COL1A1	COL1A1	138,941	1.08023	2.11437	0.000341359	3.46679	-0.366554	0.775633	0.159595	0.796981	1.23443	2.35288	8.15325e-05	4.08867	-0.750849	0.594254	0.0071763	2.1441	-0.5214	0.696695	0.0507731	1.29437	-1.44678	0.366838	0.000133244	3.87535	0.1542	1.1128	0.621361	0.206656	-1.83108	0.281054	7.76086e-06	5.11009	-1.60163	0.329504	4.16368e-05	4.38052	1.60098	3.0335	4.18375e-05	4.37843	-0.384295	0.766153	0.225573	0.646713	-0.154846
P02545	Prelamin-A/C [Cleaved into: Lamin-A/C (70 kDa lamin) (Renal carcinoma antigen NY-REN-32)]	LMNA LMN1	LMNA	74,139	0.282233	1.21608	0.000628181	3.20192	-0.0565987	0.961528	0.426875	0.369699	0.392617	1.31277	1.62384e-05	4.78946	-0.440619	0.736818	3.55923e-06	5.44864	-0.172421	0.887352	0.02255	1.64685	-0.338832	0.790681	0.000757655	3.12053	0.110384	1.07952	0.211206	0.675293	-0.722852	0.605898	4.66008e-08	7.33161	-0.454654	0.729685	3.24948e-05	4.48819	0.449216	1.3653	3.75707e-05	4.42515	-0.384021	0.766299	0.000219511	3.65854	-0.115822
P02751	Fibronectin (FN) (Cold-insoluble globulin) (CIG) [Cleaved into: Anastellin; Ugl-Y1; Ugl-Y2; Ugl-Y3]	FN1 FN	FN1	272,320	-0.18255	0.881144	0.41607	0.380834	-0.163155	0.89307	0.466569	0.331085	0.0839643	1.05993	0.706514	0.150879	-0.580477	0.668743	0.0156371	1.80584	-0.249384	0.841255	0.269964	0.568695	0.0193945	1.01353	0.943288	0.0253559	0.266514	1.2029	0.334003	0.47625	-0.397927	0.758948	0.15491	0.809921	-0.0668344	0.954731	0.806475	0.093409	0.24712	1.18684	0.369586	0.432284	-0.417322	0.748813	0.136737	0.864115	-0.0862289
P02786	Transferrin receptor protein 1 (TR) (TfR) (TfR1) (Trfr) (T9) (p90) (CD antigen CD71) [Cleaved into: Transferrin receptor protein 1, serum form (sTfR)]	TFRC	TFRC	84,871	-0.234268	0.850116	0.0392002	1.40671	0.155926	1.11414	0.157553	0.802573	-0.0666635	0.954844	0.537303	0.26978	0.421265	1.3391	0.000753783	3.12275	0.209192	1.15604	0.0628131	1.20195	0.390194	1.31057	0.00705014	2.1518	0.167604	1.12319	0.212219	0.673217	0.655533	1.5752	6.16872e-05	4.2098	0.44346	1.35986	0.00276433	2.55841	-0.222589	0.857026	0.102434	0.989557	0.265339	1.20192	0.0547224	1.26183	0.0532665
P02792	Ferritin light chain (Ferritin L subunit)	FTL	FTL	20,020	0.503796	1.41794	6.98681e-05	4.15572	-0.211456	0.863665	0.0492762	1.30736	0.326524	1.25399	0.0041638	2.38051	0.684218	1.60683	1.34071e-06	5.87266	0.450344	1.36637	0.000238984	3.62163	-0.715252	0.609099	1.15205e-05	4.93853	-0.177271	0.884374	0.167418	0.776197	0.180422	1.13322	0.160348	0.794938	-0.0534521	0.963628	0.67043	0.173646	0.537981	1.45194	0.000308932	3.51014	0.895674	1.86048	5.09941e-07	6.29248	0.6618
P04040	Catalase (EC 1.11.1.6)	CAT	CAT	59,756	0.0457482	1.03222	0.570903	0.243438	-0.0967125	0.935162	0.237317	0.624672	0.0170887	1.01192	0.831768	0.079998	-0.105769	0.929309	0.197735	0.703917	-0.093535	0.937223	0.252551	0.597651	-0.142461	0.905973	0.158395	0.800258	-0.0286596	0.980331	0.77124	0.112811	-0.151517	0.900303	0.134812	0.87027	-0.139283	0.90797	0.167427	0.776173	0.113801	1.08208	0.255591	0.592454	-0.00905667	0.993742	0.926722	0.0330503	0.00317747
P04075	Fructose-bisphosphate aldolase A (EC 4.1.2.13) (Lung cancer antigen NY-LU-1) (Muscle-type aldolase)	ALDOA ALDA	ALDOA	39,420	-0.00215759	0.998506	0.959289	0.0180505	-0.160859	0.894492	0.000981748	3.008	-0.0954336	0.935991	0.0332182	1.47862	0.0839409	1.05991	0.0579347	1.23706	-0.050797	0.965403	0.237741	0.623895	-0.158702	0.895831	0.00556368	2.25464	-0.093276	0.937392	0.082974	1.08106	0.0860985	1.0615	0.107625	0.968086	-0.0486394	0.966848	0.352714	0.452577	0.0654256	1.04639	0.215216	0.667126	0.2448	1.18493	0.000110271	3.95754	0.110062
P04080	Cystatin-B (CPI-B) (Liver thiol proteinase inhibitor) (Stefin-B)	CSTB CST6 STFB	CSTB	11,140	0.252332	1.19113	0.000476993	3.32149	0.0319391	1.02239	0.604147	0.218857	0.307278	1.23737	5.78113e-05	4.23799	-0.0652651	0.95577	0.294523	0.530881	0.0924536	1.06618	0.1429	0.844969	-0.220393	0.858331	0.0075751	2.12061	0.0549453	1.03882	0.467938	0.329812	-0.317598	0.802405	0.000364097	3.43878	-0.159879	0.8951	0.0436428	1.36009	0.275339	1.21028	0.00138104	2.85979	-0.0972042	0.934843	0.205329	0.68755	0.0605145
P04083	Annexin A1 (Annexin I) (Annexin-1) (Calpactin II) (Calpactin-2) (Chromobindin-9) (Lipocortin I) (Phospholipase A2 inhibitory protein) (p35)	ANXA1 ANX1 LPC1	ANXA1	38,714	0.276831	1.21153	0.000121048	3.91704	-0.244877	0.843888	0.000435695	3.36082	0.230782	1.17347	0.000768051	3.11461	-0.242512	0.845272	0.000479176	3.3195	-0.202606	0.868979	0.00237287	2.62473	-0.521708	0.696547	4.42749e-07	6.35384	-0.0460489	0.968585	0.526301	0.278766	-0.519343	0.69769	4.73632e-07	6.32456	-0.479437	0.717257	1.51067e-06	5.82083	0.475659	1.39055	1.68966e-06	5.7722	0.00236506	1.00164	0.973905	0.0114833	0.0422706
P04179	Superoxide dismutase [Mn], mitochondrial (EC 1.15.1.1)	SOD2	SOD2	24,750	1.26457	2.40256	8.12833e-13	12.09	0.152129	1.11121	0.0715389	1.14546	0.73662	1.66627	1.16964e-08	7.93195	0.41155	1.33011	4.823e-05	4.31668	0.709957	1.63576	2.13531e-08	7.67054	-1.11244	0.46251	3.3134e-10	9.47973	-0.527953	0.693538	2.76221e-05	4.55874	-0.853023	0.553623	2.90944e-08	7.53619	-0.554616	0.680838	1.49411e-05	4.82562	0.584491	1.49951	7.57843e-06	5.12042	0.259421	1.197	0.0153589	1.81364	0.557829
P04181	Ornithine aminotransferase, mitochondrial (EC 2.6.1.13) (Ornithine delta-aminotransferase) (Ornithine--oxo-acid aminotransferase) [Cleaved into: Ornithine aminotransferase, hepatic form; Ornithine aminotransferase, renal form]	OAT	OAT	48,535	-0.126987	0.915742	0.261409	0.582679	-0.053938	0.963303	0.628868	0.201441	-0.263682	0.832959	0.0262165	1.58143	0.097849	1.07018	0.38378	0.415918	0.0414749	1.02917	0.709824	0.148849	0.073049	1.05194	0.593271	0.226747	-0.136695	0.9096	0.321868	0.492322	0.224836	1.16864	0.110304	0.957409	0.168462	1.12386	0.225056	0.647709	-0.209744	0.864691	0.134737	0.870513	0.151787	1.11094	0.272694	0.564324	0.0954128
P04406	Glyceraldehyde-3-phosphate dehydrogenase (GAPDH) (EC 1.2.1.12) (Peptidyl-cysteine S-nitrosylase GAPDH) (EC 2.6.99.-)	GAPDH GAPD CDABP0047 OK/SW-cl.12	GAPDH	36,053	0.0629748	1.04462	0.377058	0.423591	-0.185362	0.879428	0.0150249	1.82319	-0.0511454	0.96517	0.471646	0.326384	0.0679168	1.0482	0.341535	0.466565	0.0377369	1.0265	0.594253	0.226028	-0.248337	0.841866	0.00865151	2.06291	-0.11412	0.923946	0.196293	0.707095	0.00494196	1.00343	0.954417	0.020262	-0.0252379	0.982659	0.770583	0.11318	0.134217	1.0975	0.131567	0.880855	0.253279	1.19191	0.00759788	2.11931	0.223099
P04792	Heat shock protein beta-1 (HspB1) (28 kDa heat shock protein) (Estrogen-regulated 24 kDa protein) (Heat shock 27 kDa protein) (HSP 27) (Stress-responsive protein 27) (SRP27)	HSPB1 HSP27 HSP28	HSPB1	22,783	1.09241	2.1323	8.0398e-09	8.09475	-0.582376	0.667863	6.39818e-05	4.19394	0.777907	1.71464	1.52348e-06	5.81716	-0.466159	0.723889	0.000662955	3.17852	-0.143477	0.905335	0.230115	0.638055	-1.67479	0.313213	1.70354e-10	9.76865	-0.314502	0.804129	0.0384561	1.41503	-1.55857	0.339488	6.01333e-10	9.22089	-1.23589	0.424582	2.93765e-08	7.532	1.36028	2.56736	6.10389e-09	8.21439	0.116217	1.08389	0.42266	0.374009	0.438899
P04818	Thymidylate synthase (TS) (TSase) (EC 2.1.1.45)	TYMS TS OK/SW-cl.29	TYMS	35,716	-0.318874	0.801695	0.0752175	1.12368	-0.36454	0.776716	0.0443522	1.35308	-0.537659	0.688888	0.00486092	2.31328	-0.333911	0.793383	0.0634188	1.19778	-0.632068	0.645251	0.00134485	2.87133	-0.0456665	0.968842	0.828564	0.0816737	-0.218785	0.859289	0.305702	0.514701	-0.0150373	0.989631	0.943125	0.0254306	-0.313194	0.804858	0.147969	0.82983	-0.173118	0.886924	0.415366	0.38157	0.0306292	1.02146	0.884485	0.0533096	-0.267528
P04843	Dolichyl-diphosphooligosaccharide--protein glycosyltransferase subunit 1 (Dolichyl-diphosphooligosaccharide--protein glycosyltransferase 67 kDa subunit) (Ribophorin I) (RPN-I) (Ribophorin-1)	RPN1	RPN1	68,569	-0.187896	0.877885	0.261636	0.582303	0.187563	1.13884	0.262456	0.580944	0.142886	1.10411	0.390151	0.408768	-0.137757	0.908931	0.407084	0.390316	-0.0456149	0.968877	0.782043	0.106769	0.37546	1.29725	0.0740415	1.13052	0.330782	1.2577	0.112387	0.949284	0.0501397	1.03537	0.803869	0.0948149	0.142281	1.10365	0.483373	0.315717	-0.0446771	0.969507	0.824841	0.0836298	-0.32532	0.798121	0.118074	0.927845	-0.233178
P04899	Guanine nucleotide-binding protein G(i) subunit alpha-2 (Adenylate cyclase-inhibiting G alpha protein)	GNAI2 GNAI2B	GNAI2	40,451	0.109096	1.07855	0.539176	0.26827	0.379508	1.3009	0.0418759	1.37804	0.737181	1.66692	0.000414362	3.38262	-0.0877877	0.940965	0.620632	0.207166	0.274463	1.20954	0.131619	0.880681	0.270412	1.20615	0.220564	0.656466	0.628085	1.54551	0.00812154	2.09036	-0.196884	0.872433	0.368198	0.433918	0.165367	1.12145	0.448405	0.34833	0.357673	1.28136	0.10994	0.958843	-0.467296	0.723319	0.0408946	1.38833	-0.105045
P05091	Aldehyde dehydrogenase, mitochondrial (EC 1.2.1.3) (ALDH class 2) (ALDH-E2) (ALDHI)	ALDH2 ALDM	ALDH2	56,381	0.088639	1.06337	0.212598	0.672441	0.0611777	1.04332	0.384778	0.414789	0.25027	1.18943	0.00163671	2.78603	-0.193262	0.874626	0.0108507	1.96454	0.0108238	1.00753	0.876659	0.0571694	-0.0274613	0.981145	0.748062	0.126062	0.161631	1.11855	0.0695972	1.15741	-0.281901	0.822507	0.00322094	2.49202	-0.0778152	0.947491	0.367079	0.43524	0.189092	1.14005	0.0363648	1.43932	-0.25444	0.838313	0.00677521	2.16908	-0.0503539
P05121	Plasminogen activator inhibitor 1 (PAI) (PAI-1) (Endothelial plasminogen activator inhibitor) (Serpin E1)	SERPINE1 PAI1 PLANH1	SERPINE1	45,060	0.80311	1.74486	2.64932e-07	6.57687	-0.296223	0.814382	0.0112934	1.94718	0.88188	1.84277	6.24078e-08	7.20476	-0.496795	0.70868	0.000142813	3.84523	0.0136874	1.00953	0.898751	0.0463605	-1.09933	0.466732	4.71732e-08	7.3263	0.0787694	1.05612	0.551635	0.258348	-1.2999	0.406153	3.01272e-09	8.52104	-0.789423	0.578576	6.0764e-06	5.21635	1.1781	2.26279	1.54617e-08	7.81074	-0.200572	0.870206	0.138721	0.857859	0.30991
P05141	ADP/ATP translocase 2 (ADP,ATP carrier protein 2) (ADP,ATP carrier protein, fibroblast isoform) (Adenine nucleotide translocator 2) (ANT 2) (Solute carrier family 25 member 5) [Cleaved into: ADP/ATP translocase 2, N-terminally processed]	SLC25A5 ANT2	SLC25A5	32,852	-0.222269	0.857216	0.449861	0.346921	0.40395	1.32313	0.176565	0.753095	0.0431649	1.03037	0.88252	0.0542756	-0.0316732	0.978285	0.913641	0.0392245	-0.0492543	0.966436	0.866104	0.0624298	0.626218	1.54351	0.091395	1.03908	0.265434	1.202	0.461085	0.336219	0.190595	1.14123	0.59541	0.225184	0.173014	1.12741	0.62957	0.200956	-0.360785	0.778741	0.319196	0.495943	-0.435623	0.739374	0.231694	0.635085	-0.453204
P05198	Eukaryotic translation initiation factor 2 subunit 1 (Eukaryotic translation initiation factor 2 subunit alpha) (eIF-2-alpha) (eIF-2A) (eIF-2alpha)	EIF2S1 EIF2A	EIF2S1	36,112	0.00217373	1.00151	0.960067	0.0176987	-0.029958	0.979449	0.492735	0.307387	-0.0827326	0.944267	0.0678819	1.16825	0.177932	1.13126	0.000489972	3.30983	0.102953	1.07397	0.0261201	1.58303	-0.0321317	0.977974	0.547467	0.261642	-0.0849063	0.942846	0.121476	0.915511	0.175758	1.12956	0.00319006	2.4962	0.100779	1.07235	0.0692604	1.15951	-0.0527746	0.96408	0.326837	0.485668	0.20789	1.155	0.000766869	3.11528	0.132911
P05386	60S acidic ribosomal protein P1 (Large ribosomal subunit protein P1)	RPLP1 RRP1	RPLP1	11,514	-0.176624	0.884771	0.089881	1.04633	-0.130878	0.913275	0.201554	0.695608	-0.0102263	0.992937	0.918855	0.036753	-0.151366	0.900397	0.142328	0.84671	-0.171528	0.887902	0.0988681	1.00494	0.0457457	1.03222	0.710266	0.148579	0.166397	1.12225	0.185597	0.731428	0.0252573	1.01766	0.837288	0.0771249	0.00509543	1.00354	0.966936	0.0146023	0.120652	1.08723	0.332125	0.478699	-0.0204884	0.985899	0.867671	0.0616451	-0.0406502
P05387	60S acidic ribosomal protein P2 (Large ribosomal subunit protein P2) (Renal carcinoma antigen NY-REN-44)	RPLP2 D11S2243E RPP2	RPLP2	11,665	0.00893619	1.00621	0.935137	0.0291249	0.0143938	1.01003	0.89572	0.0478276	0.0717677	1.051	0.51559	0.287695	0.006608	1.00459	0.95201	0.0213585	-0.106161	0.929057	0.339206	0.469536	0.00545758	1.00379	0.967627	0.0142922	0.0628315	1.04451	0.641238	0.192981	-0.00232819	0.998388	0.986186	0.00604105	-0.115097	0.92332	0.39636	0.40191	0.0573739	1.04057	0.670335	0.173708	-0.00778577	0.994618	0.95383	0.0205289	-0.120555
P05388	60S acidic ribosomal protein P0 (60S ribosomal protein L10E) (Large ribosomal subunit protein uL10)	RPLP0	RPLP0	34,274	-0.168414	0.88982	0.00566162	2.24706	-0.136724	0.909582	0.0205593	1.68699	-0.224379	0.855963	0.000518947	3.28488	-0.15452	0.898431	0.0100566	1.99755	-0.224179	0.856082	0.000523434	3.28114	0.0316902	1.02221	0.639391	0.194233	-0.055965	0.961951	0.410702	0.386474	0.0138934	1.00968	0.836884	0.0773347	-0.0557654	0.962084	0.412345	0.38474	-0.0876552	0.941051	0.203012	0.692478	-0.0177968	0.98774	0.792062	0.101241	-0.0874555
P05455	Lupus La protein (La autoantigen) (La ribonucleoprotein) (Sjoegren syndrome type B antigen) (SS-B)	SSB	SSB	46,837	0.308603	1.23851	3.87896e-06	5.41128	0.202763	1.1509	0.000523051	3.28146	0.255559	1.1938	4.31056e-05	4.36547	0.409511	1.32824	5.97558e-08	7.22362	0.513101	1.42711	1.44959e-09	8.83876	-0.105839	0.929264	0.0941589	1.02614	-0.0530438	0.963901	0.389006	0.410043	0.100908	1.07245	0.109415	0.960924	0.204498	1.15229	0.00285915	2.54376	0.0527956	1.03727	0.391188	0.407614	0.206748	1.15408	0.00262259	2.58127	0.310337
P05556	Integrin beta-1 (Fibronectin receptor subunit beta) (Glycoprotein IIa) (GPIIA) (VLA-4 subunit beta) (CD antigen CD29)	ITGB1 FNRB MDF2 MSK12	ITGB1	88,415	0.0344936	1.0242	0.833551	0.0790677	0.193049	1.14318	0.247322	0.606737	0.617138	1.53383	0.00108933	2.96284	-0.356618	0.780993	0.0395672	1.40267	-0.0660226	0.955268	0.68795	0.162443	0.158555	1.11617	0.433606	0.362905	0.582644	1.49759	0.0081295	2.08994	-0.391112	0.762542	0.0626364	1.20317	-0.100516	0.932699	0.617981	0.209025	0.424089	1.34173	0.0450425	1.34638	-0.549667	0.683178	0.0117697	1.92923	-0.259071
P05783	Keratin, type I cytoskeletal 18 (Cell proliferation-inducing gene 46 protein) (Cytokeratin-18) (CK-18) (Keratin-18) (K18)	KRT18 CYK18 PIG46	KRT18	48,058	-0.525123	0.6949	0.000185396	3.7319	-0.159133	0.895563	0.181707	0.740628	-0.0886544	0.940399	0.449848	0.346934	-1.272	0.414085	5.29215e-10	9.27637	-1.01396	0.495185	2.39743e-08	7.62025	0.365989	1.28877	0.0171559	1.76559	0.436468	1.35329	0.00564094	2.24865	-0.746877	0.595892	3.38342e-05	4.47064	-0.488838	0.712599	0.00240164	2.61949	0.070479	1.05007	0.622323	0.205984	-1.11287	0.462374	1.35711e-07	6.86738	-0.854828
P06493	Cyclin-dependent kinase 1 (CDK1) (EC 2.7.11.22) (EC 2.7.11.23) (Cell division control protein 2 homolog) (Cell division protein kinase 1) (p34 protein kinase)	CDK1 CDC2 CDC28A CDKN1 P34CDC2	CDK1	34,095	-0.933518	0.52358	1.37009e-12	11.8633	-0.213951	0.862173	0.00211681	2.67432	-1.03991	0.486357	1.80891e-13	12.7426	-0.233419	0.850617	0.0010017	2.99926	-0.71075	0.611002	1.94462e-10	9.71116	0.719567	1.64669	5.15654e-09	8.28764	-0.106396	0.928906	0.167797	0.775215	0.700099	1.62462	8.14041e-09	8.08935	0.222768	1.16697	0.00710574	2.14839	-0.825963	0.564106	4.88621e-10	9.31103	-0.019468	0.986596	0.796116	0.0990236	-0.496799
P06576	ATP synthase subunit beta, mitochondrial (EC 7.1.2.2) (ATP synthase F1 subunit beta)	ATP5F1B ATP5B ATPMB ATPSB	ATP5F1B	56,560	0.301948	1.23281	0.00298371	2.52524	0.0781709	1.05568	0.392434	0.406233	0.235814	1.17757	0.0157713	1.80213	-0.010961	0.992431	0.903679	0.0439857	0.250858	1.18991	0.0108995	1.96259	-0.223777	0.85632	0.0543877	1.2645	-0.0661338	0.955194	0.552772	0.257454	-0.312909	0.805017	0.00971481	2.01257	-0.0510906	0.965206	0.64594	0.189808	0.157643	1.11546	0.165494	0.781217	-0.0891319	0.940088	0.425357	0.371247	0.172687
P06703	Protein S100-A6 (Calcyclin) (Growth factor-inducible protein 2A9) (MLN 4) (Prolactin receptor-associated protein) (PRA) (S100 calcium-binding protein A6)	S100A6 CACY	S100A6	10,180	0.603648	1.51955	3.14267e-11	10.5027	0.194755	1.14453	0.000453734	3.3432	0.560922	1.47521	1.17197e-10	9.93108	0.312214	1.24161	1.5389e-06	5.81279	0.469514	1.38464	2.58168e-09	8.5881	-0.408893	0.753201	5.84342e-07	6.23333	-0.0427254	0.970819	0.462402	0.33498	-0.291434	0.81709	5.23725e-05	4.2809	-0.134134	0.911217	0.028956	1.53826	0.366167	1.28892	2.82196e-06	5.54945	0.117459	1.08482	0.0525996	1.27902	0.274759
P06730	Eukaryotic translation initiation factor 4E (eIF-4E) (eIF4E) (eIF-4F 25 kDa subunit) (mRNA cap-binding protein)	EIF4E EIF4EL1 EIF4F	EIF4E	25,097	-0.178218	0.883794	0.0947054	1.02363	-0.102636	0.93133	0.324513	0.488768	-0.0323988	0.977793	0.75316	0.123113	-0.0679988	0.95396	0.51103	0.291554	0.0595042	1.04211	0.564705	0.248178	0.075582	1.05379	0.550475	0.259262	0.145819	1.10636	0.255057	0.593362	0.110219	1.07939	0.386325	0.413047	0.237722	1.17913	0.0704974	1.15183	0.0702373	1.04989	0.578779	0.237487	0.0346373	1.0243	0.783631	0.105888	0.16214
P06733	Alpha-enolase (EC 4.2.1.11) (2-phospho-D-glycerate hydro-lyase) (C-myc promoter-binding protein) (Enolase 1) (MBP-1) (MPB-1) (Non-neural enolase) (NNE) (Phosphopyruvate hydratase) (Plasminogen-binding protein)	ENO1 ENO1L1 MBPB1 MPB1	ENO1	47,169	0.0640792	1.04542	0.127215	0.895461	-0.00151467	0.998951	0.970373	0.0130613	0.122526	1.08864	0.00640516	2.19347	0.0729471	1.05186	0.0850823	1.07016	0.0617686	1.04374	0.140712	0.851669	-0.0655939	0.955552	0.198499	0.702241	0.0584464	1.04134	0.249904	0.602227	0.0088679	1.00617	0.859135	0.0659386	-0.00231062	0.9984	0.963103	0.0163274	0.12404	1.08978	0.0205279	1.68766	0.0744618	1.05297	0.146726	0.833494	0.0632833
P06737	Glycogen phosphorylase, liver form (EC 2.4.1.1)	PYGL	PYGL	97,149	-0.0307063	0.978941	0.61153	0.213582	0.0871839	1.06229	0.158409	0.800221	0.0475624	1.03352	0.433542	0.362969	0.168039	1.12353	0.0104575	1.98057	0.208142	1.1552	0.00225349	2.64714	0.11789	1.08515	0.121381	0.915849	0.0782686	1.05575	0.295644	0.52923	0.198745	1.1477	0.0129529	1.88763	0.238848	1.18005	0.00374998	2.42597	-0.0396216	0.97291	0.592718	0.227152	0.080855	1.05764	0.280413	0.552202	0.120958
P06748	Nucleophosmin (NPM) (Nucleolar phosphoprotein B23) (Nucleolar protein NO38) (Numatrin)	NPM1 NPM	NPM1	32,575	0.0313596	1.02197	0.590191	0.229008	0.049285	1.03475	0.399842	0.398112	-0.0890391	0.940149	0.135782	0.867157	0.156106	1.11428	0.0130129	1.88563	0.138294	1.1006	0.0254438	1.59442	0.0179254	1.0125	0.80098	0.0963782	-0.120399	0.919933	0.10158	0.993192	0.124746	1.09032	0.0905831	1.04295	0.106935	1.07694	0.143118	0.844307	-0.138324	0.908574	0.062621	1.20328	0.106821	1.07685	0.143523	0.84308	0.0890095
P06756	Integrin alpha-V (Vitronectin receptor) (Vitronectin receptor subunit alpha) (CD antigen CD51) [Cleaved into: Integrin alpha-V heavy chain; Integrin alpha-V light chain]	ITGAV MSK8 VNRA VTNR	ITGAV	116,038	0.063761	1.04519	0.712166	0.147419	0.138346	1.10064	0.426329	0.370255	0.615458	1.53204	0.00172534	2.76313	-0.369433	0.774087	0.0423057	1.3736	-0.212357	0.863126	0.226969	0.644033	0.0745854	1.05306	0.724509	0.139956	0.551697	1.46581	0.0155275	1.8089	-0.433194	0.74062	0.0509369	1.29297	-0.276118	0.82581	0.200629	0.697607	0.477111	1.39195	0.0332076	1.47876	-0.507779	0.703304	0.0244075	1.61248	-0.350703
P07108	Acyl-CoA-binding protein (ACBP) (Diazepam-binding inhibitor) (DBI) (Endozepine) (EP)	DBI	DBI	10,044	0.102404	1.07356	0.128779	0.890153	-0.116116	0.922668	0.087505	1.05797	0.278681	1.21309	0.00033603	3.47362	-0.326401	0.797523	6.03321e-05	4.21945	-0.139359	0.907923	0.0433911	1.3626	-0.218519	0.859447	0.0120359	1.91952	0.176277	1.12996	0.0375713	1.42514	-0.428805	0.742877	2.60782e-05	4.58372	-0.241762	0.845712	0.00624141	2.20472	0.394796	1.31476	6.97085e-05	4.15671	-0.210286	0.864366	0.0151203	1.82044	-0.0232431
P07195	L-lactate dehydrogenase B chain (LDH-B) (EC 1.1.1.27) (LDH heart subunit) (LDH-H) (Renal carcinoma antigen NY-REN-46)	LDHB	LDHB	36,638	-0.0900826	0.939469	0.0434953	1.36156	-0.109759	0.926743	0.0161693	1.79131	-0.247183	0.84254	8.57497e-06	5.06677	0.103001	1.07401	0.0228914	1.64033	-0.0636711	0.956826	0.14337	0.843542	-0.0196767	0.986454	0.704829	0.151916	-0.157101	0.896826	0.00604096	2.21889	0.193084	1.1432	0.0011919	2.92376	0.0264115	1.01848	0.611644	0.213501	-0.137424	0.909141	0.0142321	1.84673	0.212761	1.1589	0.00048439	3.3148	0.0460882
P07237	Protein disulfide-isomerase (PDI) (EC 5.3.4.1) (Cellular thyroid hormone-binding protein) (Prolyl 4-hydroxylase subunit beta) (p55)	P4HB ERBA2L PDI PDIA1 PO4DB	P4HB	57,116	-0.0434728	0.970316	0.430607	0.365919	-0.0804491	0.945763	0.152132	0.817778	0.0188542	1.01315	0.730834	0.136181	-0.327992	0.796644	6.06975e-06	5.21683	-0.254207	0.838448	0.000134293	3.87195	-0.0369763	0.974696	0.582603	0.234627	0.062327	1.04415	0.357585	0.44662	-0.28452	0.821015	0.000346067	3.46084	-0.210734	0.864097	0.00464245	2.33325	0.0993033	1.07126	0.149101	0.826519	-0.247543	0.84233	0.00128126	2.89236	-0.173758
P07355	Annexin A2 (Annexin II) (Annexin-2) (Calpactin I heavy chain) (Calpactin-1 heavy chain) (Chromobindin-8) (Lipocortin II) (Placental anticoagulant protein IV) (PAP-IV) (Protein I) (p36)	ANXA2 ANX2 ANX2L4 CAL1H LPC2D	ANXA2	38,604	0.520029	1.43398	0.000989362	3.00464	0.144686	1.10549	0.296759	0.527596	1.12308	2.17812	6.09143e-08	7.21528	-0.338121	0.791071	0.021024	1.67728	0.164704	1.12094	0.236789	0.625639	-0.375343	0.770922	0.0344179	1.46322	0.603055	1.51893	0.00159596	2.79698	-0.85815	0.55166	4.38772e-05	4.35776	-0.355325	0.781694	0.0440721	1.35584	0.978398	1.97028	8.5243e-06	5.06934	-0.482807	0.715584	0.00845675	2.0728	0.0200186
P07384	Calpain-1 catalytic subunit (EC 3.4.22.52) (Calcium-activated neutral proteinase 1) (CANP 1) (Calpain mu-type) (Calpain-1 large subunit) (Cell proliferation-inducing gene 30 protein) (Micromolar-calpain) (muCANP)	CAPN1 CANPL1 PIG30	CAPN1	81,890	0.0151199	1.01054	0.835225	0.0781967	-0.00165971	0.99885	0.981774	0.00798853	-0.0406321	0.972229	0.577469	0.238471	-0.231614	0.851681	0.00419397	2.37737	-0.255121	0.837917	0.0019679	2.706	-0.0167796	0.988437	0.850487	0.0703323	-0.055752	0.962093	0.532958	0.273307	-0.246734	0.842802	0.0108292	1.9654	-0.270241	0.829181	0.00594187	2.22608	-0.0389724	0.973348	0.662154	0.179041	-0.229955	0.852662	0.0164658	1.78342	-0.253461
P07602	Prosaposin (Proactivator polypeptide) [Cleaved into: Saposin-A (Protein A); Saposin-B-Val; Saposin-B (Cerebroside sulfate activator) (CSAct) (Dispersin) (Sphingolipid activator protein 1) (SAP-1) (Sulfatide/GM1 activator); Saposin-C (A1 activator) (Co-beta-glucosidase) (Glucosylceramidase activator) (Sphingolipid activator protein 2) (SAP-2); Saposin-D (Component C) (Protein C)]	PSAP GLBA SAP1	PSAP	58,113	1.20455	2.30465	1.56799e-17	16.8047	0.211705	1.15806	8.79984e-05	4.05553	0.872283	1.83056	8.34306e-15	14.0787	0.679571	1.60166	9.49394e-13	12.0226	0.942902	1.92239	1.85977e-15	14.7305	-0.992843	0.502487	3.39407e-14	13.4693	-0.332265	0.794288	3.99093e-06	5.39893	-0.524978	0.69497	3.57171e-09	8.44712	-0.261646	0.834135	7.93892e-05	4.10024	0.660578	1.58072	6.54169e-11	10.1843	0.467866	1.38306	2.39313e-08	7.62103	0.731197
P07686	Beta-hexosaminidase subunit beta (EC 3.2.1.52) (Beta-N-acetylhexosaminidase subunit beta) (Hexosaminidase subunit B) (Cervical cancer proto-oncogene 7 protein) (HCC-7) (N-acetyl-beta-glucosaminidase subunit beta) [Cleaved into: Beta-hexosaminidase subunit beta chain B; Beta-hexosaminidase subunit beta chain A]	HEXB HCC7	HEXB	63,111	0.155295	1.11365	0.00891916	2.04968	0.1653	1.1214	0.00585925	2.23216	0.116617	1.08419	0.0418221	1.37859	0.171052	1.12588	0.0045896	2.33823	0.21345	1.15946	0.000731715	3.13566	0.0100051	1.00696	0.880484	0.0552786	-0.0386776	0.973547	0.56263	0.249777	0.0157576	1.01098	0.812888	0.0899695	0.0581556	1.04113	0.386541	0.412804	-0.0486828	0.966819	0.467281	0.330421	0.00575245	1.004	0.931098	0.0310047	0.0481505
P07711	Cathepsin L1 (EC 3.4.22.15) (Cathepsin L) (Major excreted protein) (MEP) [Cleaved into: Cathepsin L1 heavy chain; Cathepsin L1 light chain]	CTSL CTSL1	CTSL	37,564	0.177797	1.13116	0.183797	0.735662	0.102287	1.07347	0.437659	0.358864	0.170675	1.12559	0.201214	0.696341	0.457841	1.37349	0.00201879	2.69491	0.367784	1.29037	0.00991525	2.0037	-0.0755099	0.949007	0.638283	0.194987	-0.00712197	0.995076	0.964536	0.0156817	0.280044	1.21423	0.0918405	1.03697	0.189987	1.14075	0.243718	0.613112	0.0683879	1.04854	0.670126	0.173844	0.355554	1.27948	0.0359727	1.44403	0.265497
P07737	Profilin-1 (Epididymis tissue protein Li 184a) (Profilin I)	PFN1	PFN1	15,054	-0.0358383	0.975465	0.585104	0.232767	-0.009961	0.993119	0.878973	0.0560247	0.0870598	1.0622	0.192671	0.715183	-0.114874	0.923463	0.0904296	1.04369	-0.126312	0.91617	0.0645379	1.19019	0.0258773	1.0181	0.746953	0.126707	0.122898	1.08892	0.135867	0.866886	-0.0790358	0.94669	0.329601	0.482011	-0.0904738	0.939214	0.266168	0.574845	0.0970208	1.06956	0.234179	0.630452	-0.104913	0.929861	0.199616	0.699804	-0.116351
P07741	Adenine phosphoribosyltransferase (APRT) (EC 2.4.2.7)	APRT	APRT	19,608	0.293057	1.22523	4.83821e-05	4.31532	0.234393	1.17641	0.000531698	3.27434	0.192532	1.14277	0.00295511	2.52943	0.526544	1.44047	1.10309e-08	7.95739	0.583718	1.49871	1.96159e-09	8.70739	-0.0586637	0.960153	0.410279	0.386921	-0.100524	0.932694	0.164975	0.782582	0.233487	1.17567	0.00319034	2.49616	0.290662	1.2232	0.000471247	3.32675	-0.0418606	0.971401	0.555171	0.255573	0.292151	1.22446	0.000448232	3.3485	0.349325
P07814	Bifunctional glutamate/proline--tRNA ligase (Bifunctional aminoacyl-tRNA synthetase) (Cell proliferation-inducing gene 32 protein) (Glutamatyl-prolyl-tRNA synthetase) [Includes: Glutamate--tRNA ligase (EC 6.1.1.17) (Glutamyl-tRNA synthetase) (GluRS); Proline--tRNA ligase (EC 6.1.1.15) (Prolyl-tRNA synthetase)]	EPRS GLNS PARS QARS QPRS PIG32	EPRS	170,591	-0.153375	0.899144	0.00147147	2.83225	0.0989304	1.07098	0.0276629	1.5581	-0.116555	0.922388	0.0110928	1.95496	0.0315254	1.02209	0.458136	0.339005	-0.0148795	0.989739	0.724779	0.139794	0.252306	1.19111	7.69868e-05	4.11358	0.0368204	1.02585	0.478967	0.319694	0.184901	1.13674	0.00168339	2.77381	0.138496	1.10076	0.0133309	1.87514	-0.215485	0.861256	0.000413886	3.38312	-0.067405	0.954353	0.201454	0.695824	-0.11381
P07858	Cathepsin B (EC 3.4.22.1) (APP secretase) (APPS) (Cathepsin B1) [Cleaved into: Cathepsin B light chain; Cathepsin B heavy chain]	CTSB CPSB	CTSB	37,822	-0.0485285	0.966922	0.749762	0.125077	0.0600756	1.04252	0.693155	0.15917	-0.0482101	0.967136	0.751345	0.124161	-0.23346	0.850592	0.13539	0.868414	-0.109163	0.927126	0.475371	0.322968	0.108604	1.07818	0.561192	0.250889	0.000318411	1.00022	0.998635	0.000593274	-0.184932	0.879691	0.326302	0.48638	-0.060635	0.958842	0.744896	0.127904	-0.108286	0.92769	0.562331	0.250008	-0.293536	0.8159	0.125853	0.900136	-0.169239
P07900	Heat shock protein HSP 90-alpha (Heat shock 86 kDa) (HSP 86) (HSP86) (Lipopolysaccharide-associated protein 2) (LAP-2) (LPS-associated protein 2) (Renal carcinoma antigen NY-REN-38)	HSP90AA1 HSP90A HSPC1 HSPCA	HSP90AA1	84,660	-0.145093	0.904321	0.00213133	2.67135	-0.207484	0.866046	6.22483e-05	4.20587	-0.335543	0.792486	8.45717e-08	7.07277	0.087426	1.06247	0.0464678	1.33285	-0.162504	0.893473	0.000794519	3.0999	-0.0623904	0.957676	0.230593	0.637154	-0.19045	0.876333	0.00118281	2.92709	0.232519	1.17488	0.000167921	3.7749	-0.0174106	0.988004	0.733679	0.134494	-0.128059	0.915062	0.0195379	1.70912	0.29491	1.22681	9.97337e-06	5.00116	0.0449798
P07919	Cytochrome b-c1 complex subunit 6, mitochondrial (Complex III subunit 6) (Complex III subunit VIII) (Cytochrome c1 non-heme 11 kDa protein) (Mitochondrial hinge protein) (Ubiquinol-cytochrome c reductase complex 11 kDa protein)	UQCRH	UQCRH	10,739	0.0104199	1.00725	0.938032	0.0277822	0.0416278	1.02927	0.756384	0.121257	0.101332	1.07276	0.452829	0.344065	0.0356737	1.02504	0.790282	0.102218	0.0352618	1.02474	0.792643	0.100922	0.0312079	1.02187	0.849275	0.0709518	0.0909123	1.06504	0.581129	0.235728	0.0252538	1.01766	0.87776	0.0566243	0.0248419	1.01737	0.879737	0.0556472	0.0597044	1.04225	0.716504	0.144781	-0.00595415	0.995881	0.971064	0.0127523	-0.00636601
P07954	Fumarate hydratase, mitochondrial (Fumarase) (HsFH) (EC 4.2.1.2)	FH	FH	54,637	0.23016	1.17297	0.000624931	3.20417	0.0643267	1.0456	0.27142	0.566358	0.165248	1.12136	0.00871803	2.05958	0.0792833	1.05649	0.178589	0.748145	0.199004	1.14791	0.00224705	2.64839	-0.165833	0.891413	0.0272907	1.56398	-0.0649124	0.956003	0.362519	0.440669	-0.150877	0.900703	0.0425218	1.37139	-0.0311558	0.978636	0.659507	0.180781	0.100921	1.07246	0.162855	0.788199	0.0149565	1.01042	0.832176	0.0797847	0.134678
P08133	Annexin A6 (67 kDa calelectrin) (Annexin VI) (Annexin-6) (Calphobindin-II) (CPB-II) (Chromobindin-20) (Lipocortin VI) (Protein III) (p68) (p70)	ANXA6 ANX6	ANXA6	75,873	-0.0806219	0.94565	0.0897327	1.04705	-0.0225393	0.984498	0.623621	0.205079	-0.0641142	0.956532	0.171588	0.765514	-0.0545267	0.96291	0.241931	0.616309	-0.110047	0.926558	0.0244042	1.61254	0.0580826	1.04108	0.306784	0.513168	0.0165077	1.01151	0.768736	0.114223	0.0260952	1.01825	0.642621	0.192045	-0.0294247	0.979811	0.601073	0.221073	-0.0415749	0.971594	0.461585	0.335748	-0.0319874	0.978072	0.570008	0.244119	-0.0875073
P08237	ATP-dependent 6-phosphofructokinase, muscle type (ATP-PFK) (PFK-M) (EC 2.7.1.11) (6-phosphofructokinase type A) (Phosphofructo-1-kinase isozyme A) (PFK-A) (Phosphohexokinase)	PFKM PFKX	PFKM	85,183	-0.105972	0.929179	0.123325	0.908947	0.0294755	1.02064	0.65939	0.180857	-0.194486	0.873884	0.00784938	2.10516	-0.0552661	0.962417	0.411435	0.385699	-0.004004	0.997228	0.952141	0.0212985	0.135448	1.09843	0.108708	0.96374	-0.0885137	0.940491	0.285641	0.54418	0.0507061	1.03577	0.53683	0.270163	0.101968	1.07324	0.220807	0.655988	-0.223962	0.856211	0.0116298	1.93443	-0.0847417	0.942953	0.306098	0.51414	-0.0334795
P08238	Heat shock protein HSP 90-beta (HSP 90) (Heat shock 84 kDa) (HSP 84) (HSP84)	HSP90AB1 HSP90B HSPC2 HSPCB	HSP90AB1	83,264	-0.368617	0.774525	2.15866e-07	6.66582	-0.27026	0.82917	1.6494e-05	4.78267	-0.411692	0.751741	3.84756e-08	7.41481	-0.505019	0.704651	1.29628e-09	8.8873	-0.543994	0.68587	3.57228e-10	9.44705	0.0983575	1.07055	0.110485	0.956698	-0.0430746	0.970584	0.473102	0.325046	-0.136402	0.909785	0.031261	1.505	-0.175376	0.885536	0.00741789	2.12972	-0.141432	0.906619	0.0261417	1.58267	-0.23476	0.849826	0.000721313	3.14188	-0.273734
P08243	Asparagine synthetase [glutamine-hydrolyzing] (EC 6.3.5.4) (Cell cycle control protein TS11) (Glutamine-dependent asparagine synthetase)	ASNS TS11	ASNS	64,370	-0.353911	0.78246	4.21627e-05	4.37507	0.225304	1.16902	0.00344529	2.46277	-0.161165	0.894303	0.0278747	1.55479	0.0950306	1.06809	0.177448	0.750929	-0.199572	0.870809	0.00814951	2.08887	0.579215	1.49404	9.10735e-07	6.04061	0.192746	1.14294	0.0313161	1.50423	0.448942	1.36504	2.75867e-05	4.5593	0.154339	1.11291	0.0785544	1.10483	-0.386469	0.765	0.000155344	3.8087	-0.130274	0.913658	0.133325	0.87509	-0.424876
P08559	Pyruvate dehydrogenase E1 component subunit alpha, somatic form, mitochondrial (EC 1.2.4.1) (PDHE1-A type I)	PDHA1 PHE1A	PDHA1	43,296	0.234018	1.17611	0.110006	0.958585	0.0293062	1.02052	0.836255	0.0776613	0.205822	1.15334	0.156884	0.804423	0.0341204	1.02393	0.809871	0.0915843	0.0533928	1.0377	0.706851	0.150672	-0.204712	0.867712	0.246285	0.608562	-0.0281968	0.980645	0.870988	0.0599878	-0.199898	0.870612	0.257201	0.589728	-0.180626	0.88232	0.304511	0.516397	0.176515	1.13015	0.315361	0.501192	0.00481422	1.00334	0.977872	0.00971811	0.0240865
P08579	U2 small nuclear ribonucleoprotein B'' (U2 snRNP B'')	SNRPB2	SNRPB2	25,486	0.0165084	1.01151	0.723962	0.140284	0.0527571	1.03725	0.265824	0.575407	0.0156508	1.01091	0.737719	0.132109	0.0542587	1.03833	0.252877	0.59709	0.0277554	1.01942	0.5538	0.256647	0.0362486	1.02544	0.528055	0.27732	-0.000857581	0.999406	0.988029	0.00523013	0.0377502	1.02651	0.511286	0.291336	0.011247	1.00783	0.844085	0.0736138	-0.0371062	0.974608	0.518441	0.2853	0.00150158	1.00104	0.979042	0.00919875	-0.0250017
P08621	U1 small nuclear ribonucleoprotein 70 kDa (U1 snRNP 70 kDa) (U1-70K) (snRNP70)	SNRNP70 RNPU1Z RPU1 SNRP70 U1AP1	SNRNP70	51,557	0.0729514	1.05187	0.0736933	1.13257	0.0119168	1.00829	0.761083	0.118568	0.0760198	1.05411	0.0632217	1.19913	-0.000128034	0.999911	0.99739	0.00113481	0.051724	1.0365	0.195882	0.708005	-0.0610346	0.958576	0.21204	0.673582	0.00306841	1.00213	0.948973	0.0227459	-0.0730794	0.950607	0.138337	0.859062	-0.0212274	0.985394	0.658738	0.181287	0.064103	1.04543	0.19083	0.719354	-0.0120448	0.991686	0.801796	0.0959364	0.0398072
P08670	Vimentin	VIM	VIM	53,652	-0.285324	0.820557	0.0111264	1.95364	0.00806478	1.00561	0.937803	0.0278886	0.0609737	1.04317	0.556917	0.254209	-0.84494	0.556734	6.53212e-08	7.18495	-0.667661	0.629526	2.18005e-06	5.66153	0.293389	1.22552	0.0292679	1.53361	0.346298	1.27129	0.0117644	1.92943	-0.559616	0.678483	0.000227885	3.64228	-0.382337	0.767194	0.00617008	2.20971	0.0529089	1.03735	0.676606	0.169664	-0.853005	0.55363	1.19929e-06	5.92108	-0.675726
P08758	Annexin A5 (Anchorin CII) (Annexin V) (Annexin-5) (Calphobindin I) (CBP-I) (Endonexin II) (Lipocortin V) (Placental anticoagulant protein 4) (PP4) (Placental anticoagulant protein I) (PAP-I) (Thromboplastin inhibitor) (Vascular anticoagulant-alpha) (VAC-alpha)	ANXA5 ANX5 ENX2 PP4	ANXA5	35,937	0.378392	1.29989	3.26308e-06	5.48637	-0.0355809	0.975639	0.556884	0.254235	0.31399	1.24314	3.61602e-05	4.44177	-0.0521543	0.964495	0.39152	0.407246	0.0522964	1.03691	0.390255	0.408652	-0.413973	0.750554	1.4519e-05	4.83806	-0.0644023	0.956341	0.3877	0.411504	-0.430547	0.741981	8.75056e-06	5.05796	-0.326096	0.797692	0.000231102	3.6362	0.349571	1.27418	0.000109158	3.96194	-0.0165735	0.988578	0.822548	0.0848385	0.0878773
P09012	U1 small nuclear ribonucleoprotein A (U1 snRNP A) (U1-A) (U1A)	SNRPA	SNRPA	31,280	0.0743995	1.05292	0.389765	0.409197	0.0197188	1.01376	0.818134	0.0871754	0.145577	1.10617	0.10078	0.996625	-0.0239056	0.983566	0.78049	0.107633	0.140429	1.10223	0.112588	0.948506	-0.0546807	0.962808	0.603618	0.219238	0.0711771	1.05057	0.500151	0.300899	-0.098305	0.93413	0.354211	0.450737	0.0660299	1.04683	0.531319	0.274644	0.125858	1.09116	0.238756	0.622046	-0.0436243	0.970215	0.678335	0.168555	0.120711
P09110	3-ketoacyl-CoA thiolase, peroxisomal (EC 2.3.1.16) (Acetyl-CoA acyltransferase) (Beta-ketothiolase) (Peroxisomal 3-oxoacyl-CoA thiolase)	ACAA1 ACAA PTHIO	ACAA1	44,292	0.252001	1.19086	0.00986633	2.00584	0.0854721	1.06103	0.345271	0.46184	0.149308	1.10904	0.106784	0.971492	0.111772	1.08055	0.220715	0.656168	0.308855	1.23872	0.00227847	2.64236	-0.166529	0.890984	0.139743	0.85467	-0.102693	0.931293	0.35431	0.450616	-0.140229	0.907375	0.210086	0.677603	0.0568537	1.04019	0.60538	0.217972	0.0638362	1.04524	0.562166	0.250136	0.0263003	1.0184	0.810601	0.0911929	0.223383
P09211	Glutathione S-transferase P (EC 2.5.1.18) (GST class-pi) (GSTP1-1)	GSTP1 FAEES3 GST3	GSTP1	23,356	0.361696	1.28494	1.722e-06	5.76397	0.0495566	1.03495	0.372864	0.428449	0.454437	1.37025	5.61588e-08	7.25058	0.0767004	1.0546	0.173624	0.760389	0.315021	1.24403	1.11464e-05	4.95286	-0.312139	0.805446	0.000139407	3.85572	0.092741	1.06639	0.178922	0.747337	-0.284996	0.820744	0.00036141	3.442	-0.0466753	0.968165	0.49139	0.308574	0.404881	1.32398	5.91943e-06	5.22772	0.0271437	1.01899	0.687867	0.162495	0.265464
P09234	U1 small nuclear ribonucleoprotein C (U1 snRNP C) (U1-C) (U1C)	SNRPC	SNRPC	17,394	0.237894	1.17927	0.0236578	1.62603	0.0846725	1.06045	0.393875	0.404641	0.189976	1.14074	0.0646327	1.18955	0.0239421	1.01673	0.807895	0.092645	0.119752	1.08655	0.23206	0.6344	-0.153222	0.89924	0.212586	0.672465	-0.0479186	0.967331	0.691486	0.160217	-0.213952	0.862172	0.0872656	1.05916	-0.118143	0.921373	0.332686	0.477965	0.105303	1.07572	0.386749	0.412571	-0.0607304	0.958779	0.615432	0.21082	0.0350791
P09382	Galectin-1 (Gal-1) (14 kDa laminin-binding protein) (HLBP14) (14 kDa lectin) (Beta-galactoside-binding lectin L-14-I) (Galaptin) (HBL) (HPL) (Lactose-binding lectin 1) (Lectin galactoside-binding soluble 1) (Putative MAPK-activating protein PM12) (S-Lac lectin 1)	LGALS1	LGALS1	14,716	0.400258	1.31974	0.00243485	2.61353	-0.0231358	0.984091	0.843321	0.074007	0.493718	1.40807	0.000367433	3.43482	-0.495454	0.709338	0.000354717	3.45012	-0.233307	0.850682	0.0570052	1.24409	-0.423394	0.745668	0.007176	2.14412	0.0934598	1.06693	0.516499	0.28693	-0.895712	0.537482	3.44028e-06	5.46341	-0.633565	0.644581	0.000227842	3.64237	0.516854	1.43083	0.00157175	2.80362	-0.472318	0.720805	0.00326136	2.4866	-0.210172
P09429	High mobility group protein B1 (High mobility group protein 1) (HMG-1)	HMGB1 HMG1	HMGB1	24,894	0.0513389	1.03623	0.266692	0.57399	-0.0282303	0.980622	0.536943	0.270072	0.165624	1.12165	0.00145362	2.83755	-0.11939	0.920577	0.0150927	1.82123	-0.0870263	0.941461	0.0669696	1.17412	-0.0795692	0.94634	0.163657	0.786066	0.114285	1.08244	0.050874	1.2935	-0.170729	0.888394	0.00559046	2.25255	-0.138365	0.908548	0.0205505	1.68718	0.193854	1.14382	0.00212664	2.67231	-0.0911595	0.938768	0.113175	0.946248	-0.058796
P09496	Clathrin light chain A (Lca)	CLTA	CLTA	27,077	0.0234417	1.01638	0.629337	0.201117	-0.0200571	0.986194	0.679389	0.167882	0.17309	1.12747	0.00169716	2.77028	0.0889865	1.06362	0.0774764	1.11083	0.0358521	1.02516	0.462154	0.335213	-0.0434988	0.970299	0.466298	0.331337	0.149648	1.1093	0.0188246	1.72528	0.0655447	1.04648	0.276328	0.558575	0.0124104	1.00864	0.83434	0.0786571	0.193147	1.14325	0.00357563	2.44665	0.109044	1.07851	0.0773311	1.11165	0.0559092
P09497	Clathrin light chain B (Lcb)	CLTB	CLTB	25,190	0.0672604	1.04773	0.398895	0.399141	0.0482555	1.03401	0.54327	0.264985	0.251806	1.1907	0.00420511	2.37622	0.119277	1.08619	0.141963	0.847825	0.268136	1.20425	0.00259676	2.58557	-0.0190048	0.986913	0.844378	0.0734631	0.184546	1.13646	0.0677054	1.16938	0.0520165	1.03671	0.592252	0.227493	0.200876	1.1494	0.0483653	1.31547	0.203551	1.15153	0.0457211	1.33988	0.0710214	1.05046	0.466013	0.331602	0.219881
P09525	Annexin A4 (35-beta calcimedin) (Annexin IV) (Annexin-4) (Carbohydrate-binding protein p33/p41) (Chromobindin-4) (Endonexin I) (Lipocortin IV) (P32.5) (PP4-X) (Placental anticoagulant protein II) (PAP-II) (Protein II)	ANXA4 ANX4	ANXA4	35,883	0.162917	1.11955	0.0498048	1.30273	-0.0242029	0.983364	0.759706	0.119354	0.439362	1.356	1.61289e-05	4.7924	-0.21773	0.859917	0.0112786	1.94775	-0.166863	0.890777	0.0449992	1.34679	-0.18712	0.878357	0.0643312	1.19158	0.276444	1.21121	0.00898335	2.04656	-0.380647	0.768093	0.000727115	3.1384	-0.329781	0.795658	0.00251705	2.59911	0.463565	1.37894	9.57784e-05	4.01873	-0.193527	0.874465	0.0564185	1.24858	-0.14266
P09622	Dihydrolipoyl dehydrogenase, mitochondrial (EC 1.8.1.4) (Dihydrolipoamide dehydrogenase) (Glycine cleavage system L protein)	DLD GCSL LAD PHE3	DLD	54,177	0.325482	1.25308	5.8907e-05	4.22983	0.0676809	1.04803	0.305257	0.515334	0.254797	1.19317	0.000763807	3.11702	-0.0218669	0.984957	0.737456	0.132264	0.180738	1.13346	0.0107874	1.96708	-0.257802	0.836361	0.00379147	2.42119	-0.0706855	0.952185	0.380268	0.41991	-0.347349	0.786027	0.000267325	3.57296	-0.144744	0.90454	0.0810198	1.09141	0.187116	1.13849	0.0276096	1.55894	-0.0895478	0.939817	0.2691	0.570086	0.113057
P09651	Heterogeneous nuclear ribonucleoprotein A1 (hnRNP A1) (Helix-destabilizing protein) (Single-strand RNA-binding protein) (hnRNP core protein A1) [Cleaved into: Heterogeneous nuclear ribonucleoprotein A1, N-terminally processed]	HNRNPA1 HNRPA1	HNRNPA1	38,747	0.0732354	1.05207	0.0991481	1.00372	-0.0789338	0.946757	0.0770697	1.11312	0.0613456	1.04344	0.162971	0.78789	-0.0808024	0.945532	0.0708322	1.14977	-0.0751814	0.949223	0.0910616	1.04066	-0.152169	0.899896	0.00818721	2.08686	-0.0118898	0.991793	0.821048	0.0856316	-0.154038	0.898732	0.00755089	2.122	-0.148417	0.90224	0.00962417	2.01664	0.140279	1.10212	0.0136139	1.86602	-0.00186858	0.998706	0.971624	0.0125017	0.00375236
P09661	U2 small nuclear ribonucleoprotein A' (U2 snRNP A')	SNRPA1	SNRPA1	28,416	-0.0640762	0.956558	0.127063	0.89598	0.0238056	1.01664	0.560899	0.251116	0.0181302	1.01265	0.657282	0.182248	0.0636851	1.04513	0.129268	0.888509	0.0321645	1.02255	0.433658	0.362852	0.0878819	1.06281	0.0897903	1.04677	0.0822064	1.05864	0.110957	0.954845	0.127761	1.0926	0.0174044	1.75934	0.0962407	1.06898	0.065011	1.18701	-0.00567541	0.996074	0.909505	0.0411951	0.0398795	1.02803	0.428093	0.368462	0.00835885
P09874	Poly [ADP-ribose] polymerase 1 (PARP-1) (EC 2.4.2.30) (ADP-ribosyltransferase diphtheria toxin-like 1) (ARTD1) (DNA ADP-ribosyltransferase PARP1) (EC 2.4.2.-) (NAD(+) ADP-ribosyltransferase 1) (ADPRT 1) (Poly[ADP-ribose] synthase 1) (Protein poly-ADP-ribosyltransferase PARP1) (EC 2.4.2.-)	PARP1 ADPRT PPOL	PARP1	113,084	-0.274879	0.82652	4.87617e-05	4.31192	-0.0488866	0.966682	0.37133	0.43024	-0.204259	0.867984	0.00106009	2.97466	0.0353667	1.02482	0.515782	0.287534	-0.154072	0.89871	0.00918058	2.03713	0.225992	1.16958	0.00250579	2.60106	0.0706192	1.05017	0.293561	0.532301	0.310245	1.23992	0.000123841	3.90714	0.120807	1.08734	0.079807	1.09796	-0.155373	0.8979	0.0277197	1.55721	0.0842533	1.06014	0.21279	0.672049	-0.105185
P09936	Ubiquitin carboxyl-terminal hydrolase isozyme L1 (UCH-L1) (EC 3.4.19.12) (Neuron cytoplasmic protein 9.5) (PGP 9.5) (PGP9.5) (Ubiquitin thioesterase L1)	UCHL1	UCHL1	24,824	0.438062	1.35478	1.04928e-08	7.97911	0.118394	1.08553	0.020905	1.67975	0.464675	1.38001	3.93071e-09	8.40553	0.0409575	1.0288	0.396206	0.402079	0.264573	1.20128	1.71968e-05	4.76455	-0.319667	0.801255	2.03853e-05	4.69068	0.0266134	1.01862	0.650491	0.186759	-0.397104	0.759381	1.10462e-06	5.95679	-0.173489	0.886696	0.00706992	2.15059	0.346281	1.27128	7.30196e-06	5.13656	-0.0774369	0.94774	0.19573	0.708342	0.146178
P09960	Leukotriene A-4 hydrolase (LTA-4 hydrolase) (EC 3.3.2.6) (Leukotriene A(4) hydrolase)	LTA4H LTA4	LTA4H	69,285	-0.122285	0.918731	0.0212559	1.67252	-0.04375	0.97013	0.382005	0.417931	-0.0412422	0.971818	0.409385	0.387869	-0.344094	0.787803	7.80631e-07	6.10755	-0.265448	0.831941	2.56583e-05	4.59077	0.078535	1.05595	0.204954	0.688343	0.0810428	1.05778	0.19143	0.71799	-0.221809	0.85749	0.00140579	2.85208	-0.143163	0.905532	0.0268529	1.57101	0.00250782	1.00174	0.967045	0.0145532	-0.300344	0.812059	6.60086e-05	4.1804	-0.221698
P0CG39	POTE ankyrin domain family member J	POTEJ	POTEJ	117,390	0.0322159	1.02258	0.698218	0.156009	0.0977813	1.07013	0.246437	0.608295	0.178892	1.13201	0.0409588	1.38765	-0.133552	0.911584	0.118541	0.92613	-0.0125427	0.991344	0.879818	0.0556069	0.0655655	1.0465	0.520773	0.283352	0.146676	1.10702	0.159142	0.798215	-0.165768	0.891454	0.113956	0.943262	-0.0447586	0.969452	0.660232	0.180303	0.0811104	1.05783	0.428227	0.368326	-0.231333	0.851847	0.0318723	1.49659	-0.110324
P0DI81	Trafficking protein particle complex subunit 2 (Sedlin)	TRAPPC2 SEDL	TRAPPC2	16,445	0.110633	1.0797	0.155345	0.808703	-0.00965709	0.993329	0.898744	0.0463639	0.130828	1.09492	0.0961009	1.01727	0.0939174	1.06726	0.224486	0.648812	0.128472	1.09313	0.101829	0.992127	-0.12029	0.920003	0.204755	0.688766	0.0201952	1.0141	0.828062	0.0819371	-0.0167151	0.988481	0.857313	0.0668605	0.017839	1.01244	0.847841	0.0716856	0.140485	1.10228	0.141429	0.849461	0.103575	1.07443	0.272391	0.564807	0.138129
P0DN76	Splicing factor U2AF 35 kDa subunit-like protein (U2 small nuclear RNA auxiliary factor 1-like protein 5)	U2AF1L5	U2AF1L5	27,872	-0.0327015	0.977588	0.65135	0.186186	0.0243393	1.01701	0.736326	0.13293	0.0665882	1.04724	0.361341	0.442083	-0.00885314	0.993882	0.902399	0.0446016	0.140393	1.10221	0.0628325	1.20182	0.0570408	1.04033	0.520949	0.283205	0.0992896	1.07125	0.26881	0.570555	0.0238483	1.01667	0.787525	0.103736	0.173094	1.12747	0.0612388	1.21297	0.0422489	1.02972	0.633684	0.198127	-0.0331924	0.977255	0.707803	0.150087	0.116053
P0DP25	Calmodulin-3	CALM3 CALML2 CAM3 CAMC CAMIII	CALM3	16,838	0.0497872	1.03511	0.413106	0.383939	0.0644057	1.04565	0.292416	0.533998	0.292338	1.22462	8.36444e-05	4.07756	-0.158301	0.89608	0.0150722	1.82182	0.0129568	1.00902	0.830009	0.0809174	0.0146185	1.01018	0.843207	0.0740658	0.24255	1.18308	0.00335993	2.47367	-0.208088	0.865683	0.00981056	2.00831	-0.0368304	0.974794	0.61918	0.208183	0.227932	1.17115	0.0053164	2.27438	-0.222707	0.856956	0.00625504	2.20377	-0.0514489
P10155	60 kDa SS-A/Ro ribonucleoprotein (60 kDa Ro protein) (60 kDa ribonucleoprotein Ro) (Ro60) (RoRNP) (Ro 60 kDa autoantigen) (Ro60 autoantigen) (Sjoegren syndrome antigen A2) (Sjoegren syndrome type A antigen) (SS-A) (TROVE domain family member 2)	RO60 SSA2 TROVE2	RO60	60,671	0.137519	1.10001	0.016401	1.78513	0.051985	1.03669	0.333998	0.476257	0.0688219	1.04886	0.204803	0.688663	-0.0223675	0.984616	0.674699	0.17089	0.136709	1.09939	0.0169586	1.77061	-0.0855335	0.942436	0.198463	0.702321	-0.0686966	0.953499	0.298152	0.525562	-0.159886	0.895096	0.021828	1.66099	-0.000809329	0.999439	0.990085	0.00432767	0.0168369	1.01174	0.796164	0.0989974	-0.0743526	0.949768	0.261236	0.582967	0.0847242
P10253	Lysosomal alpha-glucosidase (EC 3.2.1.20) (Acid maltase) (Aglucosidase alfa) [Cleaved into: 76 kDa lysosomal alpha-glucosidase; 70 kDa lysosomal alpha-glucosidase]	GAA	GAA	105,324	0.195549	1.14516	0.00271085	2.56689	0.191115	1.14165	0.00324202	2.48918	0.400947	1.32037	8.18039e-07	6.08723	0.0548533	1.03875	0.349125	0.457019	0.250486	1.18961	0.000287369	3.54156	-0.00443409	0.996931	0.950175	0.0221964	0.205398	1.153	0.00822713	2.08475	-0.140695	0.907082	0.0583007	1.23433	0.0549368	1.03881	0.442226	0.354355	0.209832	1.15655	0.00713614	2.14654	-0.136261	0.909874	0.0659659	1.18068	0.0593709
P10316	#N/A	#N/A	#N/A	#N/A	-0.0360167	0.975344	0.77745	0.109328	0.208785	1.15571	0.112292	0.949653	0.37136	1.29357	0.00781624	2.107	-0.133534	0.911596	0.300775	0.521758	0.0852723	1.06089	0.50535	0.296408	0.244802	1.18493	0.12747	0.894592	0.407376	1.32627	0.0154636	1.81069	-0.0975172	0.93464	0.533674	0.272724	0.121289	1.08771	0.440068	0.35648	0.162575	1.11928	0.303576	0.517733	-0.342319	0.788772	0.037824	1.42223	-0.123513
P10412	Histone H1.4 (Histone H1b) (Histone H1s-4)	H1-4 H1F4 HIST1H1E	H1-4	21,865	0.045237	1.03185	0.818526	0.0869674	-0.266052	0.831592	0.186646	0.728981	0.336745	1.2629	0.0988544	1.005	-0.0388043	0.973461	0.843945	0.0736856	-0.11462	0.923626	0.562412	0.249945	-0.311289	0.805921	0.206249	0.685608	0.291508	1.22392	0.235418	0.628159	-0.0840414	0.943411	0.728039	0.137845	-0.159857	0.895114	0.51002	0.292412	0.602797	1.51866	0.019889	1.70139	0.227247	1.1706	0.351658	0.45388	0.151432
P10515	Dihydrolipoyllysine-residue acetyltransferase component of pyruvate dehydrogenase complex, mitochondrial (EC 2.3.1.12) (70 kDa mitochondrial autoantigen of primary biliary cirrhosis) (PBC) (Dihydrolipoamide acetyltransferase component of pyruvate dehydrogenase complex) (M2 antigen complex 70 kDa subunit) (Pyruvate dehydrogenase complex component E2) (PDC-E2) (PDCE2)	DLAT DLTA	DLAT	68,997	0.137667	1.10012	0.106911	0.970978	0.104769	1.07532	0.213597	0.670404	0.127251	1.09221	0.134348	0.871768	0.135055	1.09813	0.113301	0.945765	0.294551	1.2265	0.00172972	2.76203	-0.0328977	0.977455	0.745338	0.127647	-0.0104152	0.992807	0.918002	0.0371565	-0.00261187	0.998191	0.9794	0.00903978	0.156884	1.11488	0.131925	0.879672	0.0224825	1.01571	0.824218	0.083958	0.0302858	1.02121	0.764889	0.116402	0.189782
P10586	Receptor-type tyrosine-protein phosphatase F (EC 3.1.3.48) (Leukocyte common antigen related) (LAR)	PTPRF LAR	PTPRF	212,879	-0.179465	0.883031	0.365017	0.437687	0.378835	1.30029	0.0644415	1.19083	0.0307313	1.02153	0.875485	0.0577511	0.0385577	1.02709	0.844167	0.0735714	-0.00381804	0.997357	0.984463	0.0068005	0.5583	1.47253	0.0288339	1.5401	0.210196	1.15685	0.385924	0.413498	0.218022	1.16314	0.368826	0.433179	0.175647	1.12947	0.467476	0.33024	-0.348104	0.785616	0.157615	0.802403	-0.340278	0.789889	0.166703	0.778055	-0.382653
P10599	Thioredoxin (Trx) (ATL-derived factor) (ADF) (Surface-associated sulphydryl protein) (SASP)	TXN TRDX TRX TRX1	TXN	11,737	0.258573	1.19629	0.00161261	2.79247	0.0626195	1.04436	0.388317	0.410814	0.359956	1.28339	5.76494e-05	4.23921	0.226951	1.17036	0.00451426	2.34541	0.387709	1.30831	2.36189e-05	4.62674	-0.195953	0.872996	0.0355742	1.44886	0.101384	1.0728	0.25739	0.589408	-0.0316215	0.97832	0.719976	0.142682	0.129136	1.09364	0.153114	0.814986	0.297337	1.22887	0.00270369	2.56804	0.164332	1.12065	0.0733365	1.13468	0.32509
P10606	Cytochrome c oxidase subunit 5B, mitochondrial (Cytochrome c oxidase polypeptide Vb)	COX5B	COX5B	13,696	0.123499	1.08937	0.0509256	1.29306	0.180551	1.13332	0.00650781	2.18657	0.270538	1.20626	0.000193073	3.71428	0.0186981	1.01304	0.756526	0.121176	0.188761	1.13978	0.00475575	2.32278	0.0570524	1.04034	0.442725	0.353866	0.14704	1.1073	0.0571105	1.24328	-0.104801	0.929933	0.1657	0.780677	0.0652622	1.04628	0.380996	0.41908	0.0899873	1.06436	0.231034	0.636323	-0.161853	0.893876	0.0379542	1.42074	0.00820984
P10644	cAMP-dependent protein kinase type I-alpha regulatory subunit (Tissue-specific extinguisher 1) (TSE1)	PRKAR1A PKR1 PRKAR1 TSE1	PRKAR1A	42,982	-0.003211	0.997777	0.966461	0.0148156	-0.196503	0.872663	0.0168756	1.77274	-0.0497272	0.966119	0.517168	0.286368	-0.172846	0.887091	0.0328365	1.48364	-0.214072	0.8621	0.0101163	1.99498	-0.193292	0.874608	0.0492681	1.30743	-0.0465162	0.968272	0.620033	0.207585	-0.169635	0.889068	0.0811155	1.0909	-0.210861	0.864021	0.0334538	1.47555	0.146776	1.10709	0.127661	0.893943	0.0236575	1.01653	0.800468	0.0966561	-0.0175689
P10809	60 kDa heat shock protein, mitochondrial (EC 5.6.1.7) (60 kDa chaperonin) (Chaperonin 60) (CPN60) (Heat shock protein 60) (HSP-60) (Hsp60) (HuCHA60) (Mitochondrial matrix protein P1) (P60 lymphocyte protein)	HSPD1 HSP60	HSPD1	61,055	0.344296	1.26953	0.00468083	2.32968	0.115641	1.08346	0.29814	0.52558	0.285543	1.21887	0.0157458	1.80283	0.234065	1.17614	0.0428527	1.36802	0.510761	1.4248	0.000129973	3.88615	-0.228655	0.85343	0.0999776	1.0001	-0.0587531	0.960094	0.662445	0.17885	-0.110231	0.926439	0.415576	0.38135	0.166465	1.1223	0.223739	0.650258	0.169902	1.12498	0.214672	0.668225	0.118424	1.08555	0.382386	0.417498	0.39512
P11021	Endoplasmic reticulum chaperone BiP (EC 3.6.4.10) (78 kDa glucose-regulated protein) (GRP-78) (Binding-immunoglobulin protein) (BiP) (Heat shock protein 70 family protein 5) (HSP70 family protein 5) (Heat shock protein family A member 5) (Immunoglobulin heavy chain-binding protein)	HSPA5 GRP78	HSPA5	72,333	-0.193115	0.874715	0.00802383	2.09562	-0.185523	0.87933	0.0103885	1.98345	-0.114036	0.923999	0.0976177	1.01047	-0.493374	0.710362	2.89489e-07	6.53837	-0.451714	0.731174	1.06197e-06	5.97389	0.00759195	1.00528	0.925697	0.0335311	0.0790787	1.05634	0.336964	0.472417	-0.300259	0.812107	0.00129532	2.88762	-0.258599	0.835899	0.00430309	2.36622	0.0714868	1.0508	0.384391	0.415226	-0.307851	0.807844	0.00103863	2.98354	-0.266191
P11047	Laminin subunit gamma-1 (Laminin B2 chain) (Laminin-1 subunit gamma) (Laminin-10 subunit gamma) (Laminin-11 subunit gamma) (Laminin-2 subunit gamma) (Laminin-3 subunit gamma) (Laminin-4 subunit gamma) (Laminin-6 subunit gamma) (Laminin-7 subunit gamma) (Laminin-8 subunit gamma) (Laminin-9 subunit gamma) (S-laminin subunit gamma) (S-LAM gamma)	LAMC1 LAMB2	LAMC1	177,603	-0.127185	0.915616	0.291562	0.535269	-0.349207	0.785015	0.00746928	2.12672	-0.127991	0.915105	0.2886	0.539703	-0.391923	0.762113	0.00325917	2.48689	-0.310959	0.806106	0.0153769	1.81313	-0.222022	0.857363	0.138217	0.859438	-0.000805789	0.999442	0.995585	0.00192178	-0.264738	0.83235	0.080441	1.09452	-0.183774	0.880397	0.215848	0.665852	0.221216	1.16572	0.139577	0.855188	-0.042716	0.970826	0.769496	0.113794	0.0382481
P11137	Microtubule-associated protein 2 (MAP-2)	MAP2	MAP2	199,526	0.655786	1.57547	2.16283e-06	5.66498	-0.218846	0.859253	0.0409513	1.38773	0.396727	1.31652	0.000765677	3.11595	0.298696	1.23003	0.00734881	2.13378	0.541651	1.45564	2.66674e-05	4.57402	-0.874632	0.545393	6.37979e-07	6.19519	-0.259059	0.835633	0.0474711	1.32357	-0.35709	0.780738	0.00862248	2.06437	-0.114135	0.923936	0.363353	0.439671	0.615573	1.53217	6.50386e-05	4.18683	0.517542	1.43151	0.000418173	3.37864	0.760497
[truncated: 1,514 more rows]
[truncated: 15 more columns]
